# Supplementary material for: Genetic disruption of WASHC4 drives endo-lysosomal dysfunction and cognitive-movement impairments in mice and humans
Source: eLife. 2021 Mar 22;10:e61590. doi: 10.7554/eLife.61590 (PMC7984842; doi:10.7554/eLife.61590)
Supplement: Supplementary file 1. — Raw data and statistical analyses for the in vivo BioID (iBioID) experiment (Figure 1). Normalized protein data were fit with a linear model to derive a model-based statistical comparison of WASH1-iBioID and solubleBioID2 control groups (Huang et al., 2020). 175 proteins were considered enriched in the WASH interactome by exhibiting a fold-change greater than four over the negative control with a Benjamini–Hochberg false discovery rate (FDR) less than 0.05 (Benjamini and Hochberg, 1995). [file elife-61590-supp1.xlsx]

## Sheet: Table of Contents
Supplementary Table 1
Experiment: WASH1 in vivo BioID Proteomics
Corresponding Figure: 1
Sheet Name	Description
Raw Protein	Raw data and corresponding protein information
WASH1-BioID	Statistical analysis of identified proteins to determine enrichment in WASH1-BioID samples
Functional Annotations	Cellular functions for WASH1-BioID2 enriched proteins
Edges	Evidence for protein-protein interactions in WASH1-BioID2 network (corresponding to dashed black edges in Figure 1)

## Sheet: Raw Protein
Identified Protein Information			Peptide Intensity for Each Sample
UniProt Accession	Description	Number of Peptides	39383 WASH 1	39384 WASH 2	39385 WASH 3	39386 Control 1	39387 Control 2	39388 Control 3	39389 QC Pool 1	39389 QC Pool 2	39389 QC Pool 3
A2A432	Cullin-4B OS=Mus musculus OX=10090 GN=Cul4b PE=1 SV=1	5	3.19737e+07	39456318	17471771	27703114	28017923	2.7608e+07	1.95665e+07	1.95337e+07	22579437
A2A5R2	Brefeldin A-inhibited guanine nucleotide-exchange protein 2 OS=Mus musculus OX=10090 GN=Arfgef2 PE=1 SV=1	2	1.10596e+07	1.54788e+07	1.16493e+07	1.19939e+07	6337326	8.40358e+06	8.70571e+06	1.35123e+07	1.10866e+07
A2A690	Protein TANC2 OS=Mus musculus OX=10090 GN=Tanc2 PE=1 SV=1	10	9.55506e+07	5.35853e+07	7.60639e+07	3.88669e+07	34127587	4.21215e+07	8.12304e+07	51876824	5.78124e+07
A2A699	Protein FAM171A2 OS=Mus musculus OX=10090 GN=Fam171a2 PE=1 SV=1	4	65092405	44422380	3.33597e+07	1.73558e+07	17422835	1.07416e+07	24662970	23592099	3.50421e+07
A2A6T1	Cerebellar degeneration-related protein 2-like OS=Mus musculus OX=10090 GN=Cdr2l PE=1 SV=1	1	4.74464e+06	6897618	3.70056e+06				1.9379e+06		3.26613e+06
A2A8Z1	Oxysterol-binding protein-related protein 9 OS=Mus musculus OX=10090 GN=Osbpl9 PE=1 SV=1	1	14433671	16685001	9311716	16157951	16524008	11397134	14915273	14473248	13195783
A2ADY9	Protein DDI1 homolog 2 OS=Mus musculus OX=10090 GN=Ddi2 PE=1 SV=1	2	2.02523e+07	21755272	4.01376e+06	1.63839e+07	30368023	20232894	1.71723e+07	18957988	19849480
A2AG50	MAP7 domain-containing protein 2 OS=Mus musculus OX=10090 GN=Map7d2 PE=1 SV=1	11	170714948	1.50321e+08	8.72244e+07	5.73175e+07	71790844	5.60475e+07	7.59567e+07	9.92083e+07	8.8704e+07
A2AGT5	Cytoskeleton-associated protein 5 OS=Mus musculus OX=10090 GN=Ckap5 PE=1 SV=1	19	2.41506e+08	1.56746e+08	1.20837e+08	1.22613e+08	96646493	9.27975e+07	1.49041e+08	1.4168e+08	1.14764e+08
A2AHC3	Calmodulin-regulated spectrin-associated protein 1 OS=Mus musculus OX=10090 GN=Camsap1 PE=1 SV=1	15	1.97636e+08	1.52735e+08	7.84742e+07	3.4605e+07	42471003	2.62407e+07	71077970	8.30303e+07	60882420
A2AHG0	Leucine zipper putative tumor suppressor 3 OS=Mus musculus OX=10090 GN=Lzts3 PE=1 SV=1	3	17734558	14577490	10454352		997880		8.91765e+06	8.26126e+06	9.66222e+06
A2AIW0	Serologically defined colon cancer antigen 3 homolog OS=Mus musculus OX=10090 GN=Sdccag3 PE=1 SV=1	4	58126114	48399372	2.67574e+07			1.51405e+06	2.59756e+07	1.69979e+07	1.76018e+07
A2AJA9	Apical junction component 1 homolog OS=Mus musculus OX=10090 GN=Ajm1 PE=1 SV=1	2	40487494	2.63802e+07	13797851	7287336	8.30357e+06	11008885	8.54301e+06	8.3338e+06	19615789
A2ALK8	Tyrosine-protein phosphatase non-receptor type 3 OS=Mus musculus OX=10090 GN=Ptpn3 PE=1 SV=1	2	19622190	1.57708e+07	1.10474e+07	4.13737e+06		5.16875e+06	9.72661e+06	9.39896e+06	9751564
A2ALS5	Rap1 GTPase-activating protein 1 OS=Mus musculus OX=10090 GN=Rap1gap PE=1 SV=2	15	388502529	3.15915e+08	2.08745e+08	1.91703e+08	1.64967e+08	169071075	2.21273e+08	2.32473e+08	2.31248e+08
A2ALU4	Protein Shroom2 OS=Mus musculus OX=10090 GN=Shroom2 PE=1 SV=1	17	3.76703e+08	3.25486e+08	1.17348e+08	3.30072e+07	4.7436e+07	3.12493e+07	1.20089e+08	1.47797e+08	1.31576e+08
A2AN08	E3 ubiquitin-protein ligase UBR4 OS=Mus musculus OX=10090 GN=Ubr4 PE=1 SV=1	22	122200960	1.17835e+08	1.04306e+08	1.42635e+08	1.43753e+08	1.30611e+08	1.21589e+08	1.06661e+08	1.2527e+08
A2AP18	1-phosphatidylinositol 4,5-bisphosphate phosphodiesterase eta-2 OS=Mus musculus OX=10090 GN=Plch2 PE=1 SV=2	3	4.52076e+07	5.26097e+07	58474675	81924626	78777618	55475907	53201383	59804232	60370306
A2AQ25	Sickle tail protein OS=Mus musculus OX=10090 GN=Skt PE=1 SV=1	16	1.85104e+08	1.75657e+08	1.17319e+08	1.91255e+07	2.39154e+07	8.35831e+06	7.73508e+07	7.75821e+07	8.72302e+07
A2ARS0	Ankyrin repeat domain-containing protein 63 OS=Mus musculus OX=10090 GN=Ankrd63 PE=1 SV=1	1	9915781	11488125	6014978	3.28495e+06	4245804	3.13439e+06	4826666	5753223	7.03365e+06
A2AWA9	Rab GTPase-activating protein 1 OS=Mus musculus OX=10090 GN=Rabgap1 PE=1 SV=1	9	6.75366e+07	5.27922e+07	26936842	6.45494e+07	3.15405e+07	4.80448e+07	4.18278e+07	5.74631e+07	53558760
A2BDX3	Adenylyltransferase and sulfurtransferase MOCS3 OS=Mus musculus OX=10090 GN=Mocs3 PE=1 SV=1	1	30671474	30592882	22700028	20804090	28090094	16547485	26110860	24981398	28337104
A2CG49	Kalirin OS=Mus musculus OX=10090 GN=Kalrn PE=1 SV=1	5	4.91163e+07	3.90153e+07	44935812	2.07346e+07	2.45384e+07	3.44538e+07	22389221	34329310	42151138
A2RSJ4	UHRF1-binding protein 1-like OS=Mus musculus OX=10090 GN=Uhrf1bp1l PE=1 SV=2	3	2.18818e+07	24825055	1.82669e+07	20874263	25580936	1.73981e+07	20131853	21347050	22890480
A2RT62	F-box/LRR-repeat protein 16 OS=Mus musculus OX=10090 GN=Fbxl16 PE=1 SV=1	8	188342687	1.25576e+08	107913235	1.28486e+08	148016748	112148021	1.45814e+08	138756932	142177050
A6H630	Protein-glutamate O-methyltransferase OS=Mus musculus OX=10090 GN=Armt1 PE=1 SV=1	2	17378278	1.65853e+07	2.00244e+07	2.72787e+07	20407718	18038874	2.22374e+07	16453138	23426901
A6H8H5	Potassium voltage-gated channel subfamily B member 2 OS=Mus musculus OX=10090 GN=Kcnb2 PE=1 SV=2	1	11821988	5.36086e+06	2507007	1.61384e+06			2459742	3.41231e+06	3276000
B0F2B4	Neuroligin 4-like OS=Mus musculus OX=10090 GN=Nlgn4l PE=1 SV=1	3	8.00697e+06	14484911	1.39695e+07	1.2626e+07	1.63946e+07	8.57644e+06	14591115	1.49461e+07	1.5548e+07
B0V2N1	Receptor-type tyrosine-protein phosphatase S OS=Mus musculus OX=10090 GN=Ptprs PE=1 SV=1	14	1.80117e+08	1.78887e+08	1.67382e+08	1.1344e+08	1.06523e+08	1.30439e+08	127278381	1.55915e+08	170779342
B1AXH1	NHS-like protein 2 OS=Mus musculus OX=10090 GN=Nhsl2 PE=1 SV=1	7	78286204	5.73183e+07	3.51818e+07	19147604	2.19646e+07	1.94238e+07	3.65518e+07	29727908	45496030
B1AXV0	DOMON domain-containing protein FRRS1L OS=Mus musculus OX=10090 GN=Frrs1l PE=1 SV=1	3	10820971	17748565	27919683	29787258	3.73393e+07	3.28e+07	32399767	18476652	22608595
B1AZP2	Disks large-associated protein 4 OS=Mus musculus OX=10090 GN=Dlgap4 PE=1 SV=1	7	1.61453e+08	1.33603e+08	7.14232e+07	24815034	1.44735e+07	2562767	9.92175e+07	47600759	99384828
B2RQC6	CAD protein OS=Mus musculus OX=10090 GN=Cad PE=1 SV=1	1	12217900	9636021	14167891	8395159	8058551	6.95112e+06	9277522	9255214	10844342
B2RSH2	Guanine nucleotide-binding protein G(i) subunit alpha-1 OS=Mus musculus OX=10090 GN=Gnai1 PE=1 SV=1	7	3.83698e+08	3.1378e+08	2.82066e+08	346758736	353875723	298174197	2.98083e+08	2.97014e+08	3.22015e+08
B2RUJ5	Amyloid-beta A4 precursor protein-binding family A member 1 OS=Mus musculus OX=10090 GN=Apba1 PE=1 SV=2	2	15619015	1.51719e+07	1.71877e+07	9.68018e+06	1.64037e+07	12228423	14798118	15994859	15034193
B2RXC1	Trafficking protein particle complex subunit 11 OS=Mus musculus OX=10090 GN=Trappc11 PE=1 SV=1	3	1.46551e+07	9.7935e+06	1.34856e+07	18486810	1.03689e+07	1.38038e+07	11984465	10971254	10739604
B2RXS4	Plexin-B2 OS=Mus musculus OX=10090 GN=Plxnb2 PE=1 SV=1	5	72342555	4.7254e+07	3.86438e+07	3.94256e+07	45748761	36203426	38397527	4.32559e+07	3.9554e+07
B5TVM2	Immunoglobulin-like domain-containing receptor 2 OS=Mus musculus OX=10090 GN=Ildr2 PE=1 SV=2	2	1.79297e+07	3.76114e+06	1.24829e+07	4.65752e+06		3.57093e+06	7883114	4993859	8.92269e+06
B9EJ86	Oxysterol-binding protein-related protein 8 OS=Mus musculus OX=10090 GN=Osbpl8 PE=1 SV=1	7	6.44275e+07	5.25221e+07	4.41691e+07	4.74277e+07	53583669	53056572	5.23668e+07	4.0087e+07	5.01161e+07
B9EJA2	Cortactin-binding protein 2 OS=Mus musculus OX=10090 GN=Cttnbp2 PE=1 SV=2	12	180342803	1.25548e+08	8.92994e+07	5.10933e+07	3.87821e+07	3.16878e+07	9.48981e+07	85884884	7.84849e+07
B9EKR1	Receptor-type tyrosine-protein phosphatase zeta OS=Mus musculus OX=10090 GN=Ptprz1 PE=1 SV=1	10	4.69866e+08	3.98166e+08	266919978	420913051	448639080	4.23906e+08	441923187	424109650	419320453
D3YVF0	A-kinase anchor protein 5 OS=Mus musculus OX=10090 GN=Akap5 PE=1 SV=2	5	86549695	3.14143e+07	83350575		3.23125e+06	5183079	18660090	1.57164e+07	1.65629e+07
D3YZI9	PiggyBac transposable element-derived protein 5 OS=Mus musculus OX=10090 GN=Pgbd5 PE=1 SV=1	4	44632492	4.1329e+07	4.19721e+07	42844462	5.11704e+07	36177881	48133758	49277074	43429143
D3YZP9	Coiled-coil domain-containing protein 6 OS=Mus musculus OX=10090 GN=Ccdc6 PE=1 SV=1	2	24922147	8.23014e+06	9.06683e+06	4548367	4.38219e+06			7.09925e+06	5.97486e+06
D3YZU1	SH3 and multiple ankyrin repeat domains protein 1 OS=Mus musculus OX=10090 GN=Shank1 PE=1 SV=1	16	364689269	2.0961e+08	1.53953e+08	7.1631e+07	7.49438e+07	70172737	149259717	1.41023e+08	1.5621e+08
E9PUL5	Proline-rich transmembrane protein 2 OS=Mus musculus OX=10090 GN=Prrt2 PE=1 SV=1	4	6.22476e+07	54068030	2.13188e+07	4.81694e+07	58717984	4.28404e+07	49959951	4.45033e+07	4.48687e+07
E9PV24	Fibrinogen alpha chain OS=Mus musculus OX=10090 GN=Fga PE=1 SV=1	6	4.89973e+07	3.56885e+07	2.80622e+07	5.05071e+07	26806738	6.04646e+07	4.23263e+07	46958240	5.04273e+07
E9PVA8	eIF-2-alpha kinase activator GCN1 OS=Mus musculus OX=10090 GN=Gcn1 PE=1 SV=1	4	2.02841e+07	1.65604e+07	1.24876e+07	15053347	2.21147e+07	2.06843e+07	1.95076e+07	1.62863e+07	1.71617e+07
E9Q3L2	Phosphatidylinositol 4-kinase alpha OS=Mus musculus OX=10090 GN=Pi4ka PE=1 SV=2	26	327736165	2.55158e+08	2.23836e+08	2.75728e+08	2.52934e+08	2.65288e+08	2.58583e+08	258156805	257721270
E9Q4P1	WD repeat and FYVE domain-containing protein 1 OS=Mus musculus OX=10090 GN=Wdfy1 PE=1 SV=1	5	63564760	5.56806e+07	1.42551e+07	8.10735e+07	69006640	59832515	6.62356e+07	6.61272e+07	68148977
E9Q557	Desmoplakin OS=Mus musculus OX=10090 GN=Dsp PE=1 SV=1	25	358916184	313774148	1.59771e+08	2.05708e+08	2.84344e+08	405561796	2.7376e+08	2.78869e+08	3.00508e+08
E9Q6B2	Coiled-coil domain-containing protein 85C OS=Mus musculus OX=10090 GN=Ccdc85c PE=1 SV=1	1	5.34657e+06	4.53159e+06					2155413		3059607
E9Q7G0	Nuclear mitotic apparatus protein 1 OS=Mus musculus OX=10090 GN=Numa1 PE=1 SV=1	1	15855299	13107943	8072132				12078868	13103662	6962766
E9Q8I9	Protein furry homolog OS=Mus musculus OX=10090 GN=Fry PE=1 SV=1	2	9747298	4.31571e+06	8.14206e+06	3.13099e+06	7.54192e+06	6868547	5.63868e+06	5.03876e+06	5.21692e+06
F6SEU4	Ras/Rap GTPase-activating protein SynGAP OS=Mus musculus OX=10090 GN=Syngap1 PE=1 SV=2	40	1394118751	8.44658e+08	6.91289e+08	2.36193e+08	3.97777e+08	191933018	5.11319e+08	5.39369e+08	5.45186e+08
F8VPU2	FERM, ARHGEF and pleckstrin domain-containing protein 1 OS=Mus musculus OX=10090 GN=Farp1 PE=1 SV=1	14	229711925	218012647	2.33789e+08	1.79275e+08	183291263	165191724	182698060	1.95995e+08	2.43384e+08
G3X9C2	F-box only protein 50 OS=Mus musculus OX=10090 GN=Nccrp1 PE=1 SV=2	1	7595636	4979901	29783634	11999195	7847189	11671733		7.03044e+06
G3X9K3	Brefeldin A-inhibited guanine nucleotide-exchange protein 1 OS=Mus musculus OX=10090 GN=Arfgef1 PE=1 SV=1	2	9.27763e+06	6173475	9941599	13377802	7635181		6.11226e+06	5.5612e+06	6683210
G3XA57	Rab11 family-interacting protein 2 OS=Mus musculus OX=10090 GN=Rab11fip2 PE=1 SV=1	3	2.23847e+07	5468348	13117751				5.73702e+06	4081164
G5E829	Plasma membrane calcium-transporting ATPase 1 OS=Mus musculus OX=10090 GN=Atp2b1 PE=1 SV=1	31	2664368399	2167338190	1767523336	2241896831	2306593238	1996152878	2139002810	2166429978	2157660578
G5E8K5	Ankyrin-3 OS=Mus musculus OX=10090 GN=Ank3 PE=1 SV=1	24	3.41555e+08	268648453	185838001	2.24007e+08	2.27372e+08	2.03795e+08	2.01317e+08	2.13748e+08	2.13351e+08
O08529	Calpain-2 catalytic subunit OS=Mus musculus OX=10090 GN=Capn2 PE=1 SV=4	4	102818091	8.14408e+07	6.0022e+07	8.05046e+07	73939030	7.0514e+07	7.35325e+07	8.36697e+07	7.75988e+07
O08530	Sphingosine 1-phosphate receptor 1 OS=Mus musculus OX=10090 GN=S1pr1 PE=1 SV=3	2	21773511	3.04528e+07	20505006	26307674	23531290	28508732	28710799	19311841	1.9953e+07
O08532	Voltage-dependent calcium channel subunit alpha-2/delta-1 OS=Mus musculus OX=10090 GN=Cacna2d1 PE=1 SV=1	2	20277259	1.6089e+07	12994704	7225388	1.39473e+07	4056145	6849630	3.97081e+06	10766139
O08539	Myc box-dependent-interacting protein 1 OS=Mus musculus OX=10090 GN=Bin1 PE=1 SV=1	21	1475294048	9.51301e+08	5.90844e+08	2.99505e+08	288396587	1.97163e+08	5.61668e+08	5.84694e+08	5.78684e+08
O08547	Vesicle-trafficking protein SEC22b OS=Mus musculus OX=10090 GN=Sec22b PE=1 SV=3	10	105461628	9.30123e+07	9.78701e+07	1.0219e+08	111586325	7.47139e+07	8.94932e+07	1.00624e+08	110727313
O08553	Dihydropyrimidinase-related protein 2 OS=Mus musculus OX=10090 GN=Dpysl2 PE=1 SV=2	53	19091897757	15743531224	13852602554	14778858674	15467938151	12592146016	15079165352	14664228033	14767725573
O08579	Emerin OS=Mus musculus OX=10090 GN=Emd PE=1 SV=1	2	28940360	1.81863e+07	1.24192e+07				11481974	14524684	1.25708e+07
O08582	GTP-binding protein 1 OS=Mus musculus OX=10090 GN=Gtpbp1 PE=1 SV=2	3	6875818	4595813	3988334	4226188	5.05277e+06	2936507	16311841	12455465	1.66935e+07
O08585	Clathrin light chain A OS=Mus musculus OX=10090 GN=Clta PE=1 SV=2	3	41044640	49737092	27627522	3.60205e+07	45342298	27699613	32920788	37647472	3.22567e+07
O08586	Phosphatidylinositol 3,4,5-trisphosphate 3-phosphatase and dual-specificity protein phosphatase PTEN OS=Mus musculus OX=10090 GN=Pten PE=1 SV=1	2	57528552	48879842	48582697	44816930	50484076	4.43629e+07	46510406	48456946	50488418
O08599	Syntaxin-binding protein 1 OS=Mus musculus OX=10090 GN=Stxbp1 PE=1 SV=2	53	9026884759	7221380001	6180737477	7041194322	7360340667	6621627834	6915223597	6934766433	6824098044
O08688	Calpain-5 OS=Mus musculus OX=10090 GN=Capn5 PE=1 SV=1	5	813018502	5.59763e+08	1024618509	1410319441	1746163596	1600143682	1076714503	1157904898	1154452384
O08709	Peroxiredoxin-6 OS=Mus musculus OX=10090 GN=Prdx6 PE=1 SV=3	17	1624748682	1311760981	8.37176e+08	1316043552	1331000847	1106484264	1157321465	1181258723	1179124228
O08739	AMP deaminase 3 OS=Mus musculus OX=10090 GN=Ampd3 PE=1 SV=2	1	10061534	8546730	8507370	8.22494e+06	7510049	7.77155e+06	8544961	9085281	8.21767e+06
O08756	3-hydroxyacyl-CoA dehydrogenase type-2 OS=Mus musculus OX=10090 GN=Hsd17b10 PE=1 SV=4	4	119277265	89055769	89440105	77658564	99215344	64964210	8.55357e+07	91542132	94207195
O08759	Ubiquitin-protein ligase E3A OS=Mus musculus OX=10090 GN=Ube3a PE=1 SV=2	11	1.77466e+08	1.52066e+08	127568969	1.67419e+08	125733905	184267544	1.5283e+08	1.7186e+08	1.33923e+08
O08788	Dynactin subunit 1 OS=Mus musculus OX=10090 GN=Dctn1 PE=1 SV=3	28	550940376	4.75977e+08	2.71646e+08	5.3833e+08	5.6157e+08	5.33489e+08	4.9678e+08	546699916	5.2746e+08
O08795	Glucosidase 2 subunit beta OS=Mus musculus OX=10090 GN=Prkcsh PE=1 SV=1	3	3.76601e+07	2.41431e+07	3.49053e+07	2.97652e+07	4.84421e+07	1.34796e+07	3.17789e+07	3.60665e+07	3.01336e+07
O08810	116 kDa U5 small nuclear ribonucleoprotein component OS=Mus musculus OX=10090 GN=Eftud2 PE=1 SV=1	9	1.28017e+08	7.39509e+07	4.52988e+07	7.42095e+07	9.50595e+07	7.29765e+07	91978641	7.0249e+07	8.42171e+07
O08848	60 kDa SS-A/Ro ribonucleoprotein OS=Mus musculus OX=10090 GN=Trove2 PE=1 SV=1	6	764488760	566751155	2.15778e+08	5.90593e+08	619478159	546684632	537124862	5.64776e+08	540287439
O08911	Mitogen-activated protein kinase 12 OS=Mus musculus OX=10090 GN=Mapk12 PE=1 SV=1	1	45371628	144295840	17309166		8838081	40676568	38011536	74596016	81822840
O08914	Fatty-acid amide hydrolase 1 OS=Mus musculus OX=10090 GN=Faah PE=1 SV=1	7	94216295	80371501	60055188	3.09235e+07	9.04168e+07	2.0199e+07	68981869	72355582	64401867
O08917	Flotillin-1 OS=Mus musculus OX=10090 GN=Flot1 PE=1 SV=1	1	4927170			6.74318e+06
O08919	Numb-like protein OS=Mus musculus OX=10090 GN=Numbl PE=1 SV=3	7	162461070	116454831	8.7617e+07	4.18986e+07	4.8868e+07	2.27538e+07	75475525	7.62256e+07	68942735
O09012	Peroxisomal targeting signal 1 receptor OS=Mus musculus OX=10090 GN=Pex5 PE=1 SV=2	2	2.35961e+07	12062269	10651795				9794884	1.12873e+07	7008522
O09061	Proteasome subunit beta type-1 OS=Mus musculus OX=10090 GN=Psmb1 PE=1 SV=1	7	165275118	1.20685e+08	1.17534e+08	9.76709e+07	9.91895e+07	8.91985e+07	1.18888e+08	96079227	104153284
O09106	Histone deacetylase 1 OS=Mus musculus OX=10090 GN=Hdac1 PE=1 SV=1	1	6073477		4.85307e+06	12647096		6026521		6.21724e+06	5.78236e+06
O09114	Prostaglandin-H2 D-isomerase OS=Mus musculus OX=10090 GN=Ptgds PE=1 SV=1	4	80030473	90131422	59164877	96080386	84062478	7.04985e+07	93943235	95279745	84933806
O09126	Semaphorin-4D OS=Mus musculus OX=10090 GN=Sema4d PE=1 SV=2	2	13310092	4678016		2706220	9.66718e+06	6.31338e+06	8.03598e+06	4.30784e+06	1.24256e+07
O09172	Glutamate--cysteine ligase regulatory subunit OS=Mus musculus OX=10090 GN=Gclm PE=1 SV=1	4	2.56336e+07	4.48077e+07	3.4968e+07	3.25863e+07	32422457	2.62961e+07	3.88799e+07	3.65944e+07	3.65465e+07
O35066	Kinesin-like protein KIF3C OS=Mus musculus OX=10090 GN=Kif3c PE=1 SV=3	1	9847141	6.2421e+06		5.04492e+06	4637804	5.35285e+06		6.68947e+06	4.16818e+06
O35075	Down syndrome critical region protein 3 homolog OS=Mus musculus OX=10090 GN=Dscr3 PE=1 SV=1	3	18492577	16217014	1.23629e+07	2.24103e+07	19786269	13276522	20156577	1.47564e+07	14028708
O35083	1-acyl-sn-glycerol-3-phosphate acyltransferase alpha OS=Mus musculus OX=10090 GN=Agpat1 PE=1 SV=1	2	40771774	30203683	31327075	36805698	33853221	2.63866e+07	34891812	36357682	35844366
O35098	Dihydropyrimidinase-related protein 4 OS=Mus musculus OX=10090 GN=Dpysl4 PE=1 SV=1	26	3984576576	3456277475	3231440826	3076693128	3285365447	3412000034	3329019481	3164097040	3294978914
O35136	Neural cell adhesion molecule 2 OS=Mus musculus OX=10090 GN=Ncam2 PE=1 SV=1	24	1142493991	9.41719e+08	6.83985e+08	9.49487e+08	1059918277	8.79666e+08	9.35646e+08	8.97714e+08	9.48643e+08
O35215	D-dopachrome decarboxylase OS=Mus musculus OX=10090 GN=Ddt PE=1 SV=3	4	69841357	50848584	55297897	127947984	166395776	5.31673e+07	112877581	71764410	107875290
O35226	26S proteasome non-ATPase regulatory subunit 4 OS=Mus musculus OX=10090 GN=Psmd4 PE=1 SV=1	5	2.30327e+08	1.7253e+08	1.3999e+08	3.82938e+07	46746637	2.16479e+07	8.54748e+07	8.82564e+07	9.74511e+07
O35239	Tyrosine-protein phosphatase non-receptor type 9 OS=Mus musculus OX=10090 GN=Ptpn9 PE=1 SV=2	2	6443060	1.19322e+07	1.32148e+07	9033459	6.62617e+06	9.46074e+06	9220941	9930210	1.1989e+07
O35286	Pre-mRNA-splicing factor ATP-dependent RNA helicase DHX15 OS=Mus musculus OX=10090 GN=Dhx15 PE=1 SV=2	14	308960651	2.24646e+08	2.41276e+08	2.02095e+08	2.5206e+08	202102260	2.29095e+08	2.31641e+08	250944142
O35295	Transcriptional activator protein Pur-beta OS=Mus musculus OX=10090 GN=Purb PE=1 SV=3	18	1030671706	813585279	7.71124e+08	3.74371e+08	4.29436e+08	349084024	5.95363e+08	5.89715e+08	6.06916e+08
O35326	Serine/arginine-rich splicing factor 5 OS=Mus musculus OX=10090 GN=Srsf5 PE=1 SV=2	2	32368910	2.78104e+07	2.07778e+07	2.09907e+07	25196736	18959772	24740746	2.37169e+07	24244358
O35344	Importin subunit alpha-4 OS=Mus musculus OX=10090 GN=Kpna3 PE=1 SV=1	4	41518490	3.1094e+07	36338644	3.33969e+07	28983508	27152598	33063017	2.7604e+07	34085750
O35381	Acidic leucine-rich nuclear phosphoprotein 32 family member A OS=Mus musculus OX=10090 GN=Anp32a PE=1 SV=1	3	4.8762e+07	45501898	2.11555e+07	33532854	3.27771e+07	26673924	3.31167e+07	3.64191e+07	30133132
O35382	Exocyst complex component 4 OS=Mus musculus OX=10090 GN=Exoc4 PE=1 SV=2	8	153573638	2.49482e+08	6.32429e+07	2.55989e+08	302275573	1.47762e+08	1.64416e+08	1.95469e+08	1.82575e+08
O35393	Ephrin-B3 OS=Mus musculus OX=10090 GN=Efnb3 PE=1 SV=1	2	5075351	1.49086e+07	14294258	13788151	3.00311e+06		1.07195e+07	4.9716e+06	1.30203e+07
O35405	Phospholipase D3 OS=Mus musculus OX=10090 GN=Pld3 PE=1 SV=1	5	273063632	215459096	1.71719e+08	206518256	164514941	139916045	155502758	146479398	159812677
O35409	Glutamate carboxypeptidase 2 OS=Mus musculus OX=10090 GN=Folh1 PE=1 SV=2	2	3.33883e+06	1.83922e+07	1.82778e+07	6.89241e+06	9.67072e+06	1.63699e+07	16396568	9.6135e+06	16016858
O35495	Cyclin-dependent kinase 14 OS=Mus musculus OX=10090 GN=Cdk14 PE=1 SV=2	1	7643367	6.03452e+06	3575509	2.826e+06	4.11766e+06	1.96282e+06	2.91433e+06	4.33233e+06
O35526	Syntaxin-1A OS=Mus musculus OX=10090 GN=Stx1a PE=1 SV=3	7	185069422	1.66498e+08	100834674	1.19558e+08	1.14743e+08	118890903	1.28415e+08	7.0256e+07	142259131
O35544	Excitatory amino acid transporter 4 OS=Mus musculus OX=10090 GN=Slc1a6 PE=1 SV=1	4	5.1469e+07	4.02949e+07	2.92637e+07	56751365	4.12047e+07	29626022	38765729	3.69463e+07	3.36897e+07
O35551	Rab GTPase-binding effector protein 1 OS=Mus musculus OX=10090 GN=Rabep1 PE=1 SV=2	1	5.0159e+06	3249414	4.39216e+06			901344	2.41666e+06	1.82786e+06
O35593	26S proteasome non-ATPase regulatory subunit 14 OS=Mus musculus OX=10090 GN=Psmd14 PE=1 SV=2	6	2.33332e+08	160692966	1.83724e+08	9.92941e+07	142986795	123564396	143609869	139306421	1.39486e+08
O35609	Secretory carrier-associated membrane protein 3 OS=Mus musculus OX=10090 GN=Scamp3 PE=1 SV=3	4	6.42433e+07	6.76486e+07	3.78816e+07	5.70846e+07	7.44231e+07	49099923	5.9139e+07	58558398	56913997
O35621	Phosphomannomutase 1 OS=Mus musculus OX=10090 GN=Pmm1 PE=1 SV=1	2	18074184	14780770	7131101	1.37629e+07	1.81999e+07	9.87579e+06	1.5721e+07	19014065	1.67135e+07
O35633	Vesicular inhibitory amino acid transporter OS=Mus musculus OX=10090 GN=Slc32a1 PE=1 SV=3	7	192040428	1.44139e+08	104195979	132171581	144337593	147624090	123356671	145806365	152796519
O35643	AP-1 complex subunit beta-1 OS=Mus musculus OX=10090 GN=Ap1b1 PE=1 SV=2	12	450977632	3.50823e+08	2.79603e+08	3.81372e+08	405028782	343945935	352184462	3.32372e+08	365946459
O35668	Huntingtin-associated protein 1 OS=Mus musculus OX=10090 GN=Hap1 PE=1 SV=1	13	264243170	324364822	328837510	4.47547e+07	49982806	47947323	152833955	1.41564e+08	1.40475e+08
O35678	Monoglyceride lipase OS=Mus musculus OX=10090 GN=Mgll PE=1 SV=1	9	3.98616e+08	3.20584e+08	2.79501e+08	336810901	3.59067e+08	2.99716e+08	325438835	333452990	3.47953e+08
O35685	Nuclear migration protein nudC OS=Mus musculus OX=10090 GN=Nudc PE=1 SV=1	8	2.45775e+08	2.11387e+08	1.30187e+08	1.47105e+08	1.55897e+08	1.20597e+08	1.78694e+08	1.77776e+08	1.67762e+08
O35737	Heterogeneous nuclear ribonucleoprotein H OS=Mus musculus OX=10090 GN=Hnrnph1 PE=1 SV=3	6	264599638	307322882	191672103	162079462	212678360	195776347	228740861	196926350	204116953
O35855	Branched-chain-amino-acid aminotransferase, mitochondrial OS=Mus musculus OX=10090 GN=Bcat2 PE=1 SV=2	3	2.83766e+07	1.1913e+07	2.20483e+07	1.32663e+07	1.92939e+07	10665716	13782278	19769019	1.62589e+07
O35864	COP9 signalosome complex subunit 5 OS=Mus musculus OX=10090 GN=Cops5 PE=1 SV=3	11	2.10609e+08	147396213	8.28745e+07	1.07032e+08	1.20577e+08	1.25086e+08	1.41535e+08	145058126	127812673
O35874	Neutral amino acid transporter A OS=Mus musculus OX=10090 GN=Slc1a4 PE=1 SV=1	3	48015970	49308850	1.89404e+07	44887223	4.16995e+07	35802308	44321957	3.93505e+07	39303641
O35900	U6 snRNA-associated Sm-like protein LSm2 OS=Mus musculus OX=10090 GN=Lsm2 PE=1 SV=1	2	23846966	10335993	7.43429e+06	2.0938e+07	25465425	2.03275e+07	1.85149e+07	9.57123e+06	20555212
O35927	Catenin delta-2 OS=Mus musculus OX=10090 GN=Ctnnd2 PE=1 SV=1	26	5.70988e+08	3.89637e+08	3.01656e+08	1.5448e+08	1.53872e+08	1.15411e+08	2.19049e+08	2.55031e+08	4.89402e+08
O35954	Membrane-associated phosphatidylinositol transfer protein 1 OS=Mus musculus OX=10090 GN=Pitpnm1 PE=1 SV=1	20	3.77015e+08	341352960	2.75664e+08	307250155	315908950	2.93186e+08	3.10628e+08	3.18935e+08	3.37197e+08
O35963	Ras-related protein Rab-33B OS=Mus musculus OX=10090 GN=Rab33b PE=1 SV=1	2	21572352	24434266	33722812	27231305	3.56078e+07	2.91716e+07	32099772	33476203	21895516
O35969	Guanidinoacetate N-methyltransferase OS=Mus musculus OX=10090 GN=Gamt PE=1 SV=1	2	28623360	28935261	18972239	1.67987e+07	8.28099e+06	8706694	18270624	19509055	17810960
O54734	Dolichyl-diphosphooligosaccharide--protein glycosyltransferase 48 kDa subunit OS=Mus musculus OX=10090 GN=Ddost PE=1 SV=2	6	104428563	7.73389e+07	178968732	89656303	9.14792e+07	6.71157e+07	104646488	63702181	9.31764e+07
O54774	AP-3 complex subunit delta-1 OS=Mus musculus OX=10090 GN=Ap3d1 PE=1 SV=1	13	2.97377e+08	1.91045e+08	9.63147e+07	2.0643e+08	2.41805e+08	1.46234e+08	1.9726e+08	1.72836e+08	1.83664e+08
O54781	SRSF protein kinase 2 OS=Mus musculus OX=10090 GN=Srpk2 PE=1 SV=2	8	7.67483e+07	6.38594e+07	5.01799e+07	5.38719e+07	53044865	4.48264e+07	53911871	4.86745e+07	4.76347e+07
O54829	Regulator of G-protein signaling 7 OS=Mus musculus OX=10090 GN=Rgs7 PE=1 SV=2	1	13125666	16939554	14767497
O54865	Guanylate cyclase soluble subunit beta-1 OS=Mus musculus OX=10090 GN=Gucy1b1 PE=1 SV=1	13	1.71832e+08	1.25513e+08	9.76649e+07	1.44874e+08	1.40647e+08	128723392	128366026	142812615	133544012
O54901	OX-2 membrane glycoprotein OS=Mus musculus OX=10090 GN=Cd200 PE=1 SV=1	5	1.87003e+08	167850845	1.42685e+08	1.21483e+08	1.47341e+08	133741898	1.57881e+08	1.50642e+08	1.49637e+08
O54931	A-kinase anchor protein 2 OS=Mus musculus OX=10090 GN=Akap2 PE=1 SV=3	4	50962067	54952817	1.99223e+07	39577556	34698064	2.98582e+07	4727889	25759204	41711162
O54983	Ketimine reductase mu-crystallin OS=Mus musculus OX=10090 GN=Crym PE=1 SV=1	10	370367064	120823780	336808370	556607063	485396150	536511696	423255251	422742575	364630117
O54984	ATPase Asna1 OS=Mus musculus OX=10090 GN=Asna1 PE=1 SV=2	5	8.07328e+07	101822647	5.43547e+07	59906206	54288635	45083595	54582999	6.1538e+07	6.73535e+07
O54988	STE20-like serine/threonine-protein kinase OS=Mus musculus OX=10090 GN=Slk PE=1 SV=2	4	4.05123e+07	39321086	25296133	3.61469e+07	24288165	39101778	41037906	27650002	20304621
O54991	Contactin-associated protein 1 OS=Mus musculus OX=10090 GN=Cntnap1 PE=1 SV=2	17	2.99307e+08	320822158	313941752	2.39848e+08	3.05837e+08	2.88423e+08	3.079e+08	258618617	2.96048e+08
O55022	Membrane-associated progesterone receptor component 1 OS=Mus musculus OX=10090 GN=Pgrmc1 PE=1 SV=4	7	207259315	237494197	141847132	1.85548e+08	252532203	155965497	200572815	195703559	189105522
O55023	Inositol monophosphatase 1 OS=Mus musculus OX=10090 GN=Impa1 PE=1 SV=1	11	597447718	575117291	488524200	4.7325e+08	5.76381e+08	5.10563e+08	561493722	522270240	5.24035e+08
O55026	Ectonucleoside triphosphate diphosphohydrolase 2 OS=Mus musculus OX=10090 GN=Entpd2 PE=1 SV=2	3	53436169	19272582	2.21443e+07	2.03755e+07	12916898	40439664	20226808	15653967	26532937
O55029	Coatomer subunit beta' OS=Mus musculus OX=10090 GN=Copb2 PE=1 SV=2	18	3.03371e+08	2.36314e+08	1.65706e+08	2.68899e+08	265280122	2.2577e+08	2.47142e+08	2.28985e+08	238633434
O55033	Cytoplasmic protein NCK2 OS=Mus musculus OX=10090 GN=Nck2 PE=1 SV=1	2	23031843	8828841	7982883	7408591	1.00261e+07	1.59765e+07	6102711	6.48963e+06	1.1343e+07
O55042	Alpha-synuclein OS=Mus musculus OX=10090 GN=Snca PE=1 SV=2	9	1337831452	7.59117e+08	479013504	7.05436e+07	25700513	3.31682e+07	3.54662e+08	3.73237e+08	3.95752e+08
O55057	Retinal rod rhodopsin-sensitive cGMP 3',5'-cyclic phosphodiesterase subunit delta OS=Mus musculus OX=10090 GN=Pde6d PE=1 SV=1	3	40336155	47847765	19785098	53103918	57968525	34128303	49748770	38358812	41795138
O55091	Protein IMPACT OS=Mus musculus OX=10090 GN=Impact PE=1 SV=2	9	2.08961e+08	180888431	110820740	180730714	181824656	1.55586e+08	1.63101e+08	175037083	177493211
O55100	Synaptogyrin-1 OS=Mus musculus OX=10090 GN=Syngr1 PE=1 SV=2	2	331823776	278514052	231550936	303068504	312304348	268136956	298915048	267075864	288688836
O55106	Striatin OS=Mus musculus OX=10090 GN=Strn PE=1 SV=2	17	840366104	6.45905e+08	3.81795e+08	160235251	1.07506e+08	113484122	3.1421e+08	341571236	3.28955e+08
O55126	Protein NipSnap homolog 2 OS=Mus musculus OX=10090 GN=Nipsnap2 PE=1 SV=1	4	73611485	6.26047e+07	54892802	45702810	4.12255e+07	3.67442e+07	44217558	48155548	4.87906e+07
O55131	Septin-7 OS=Mus musculus OX=10090 GN=Sept7 PE=1 SV=1	36	3127259074	2611115275	2279415741	2522803276	2593595379	2373306559	2481768742	2590236686	2574677216
O55135	Eukaryotic translation initiation factor 6 OS=Mus musculus OX=10090 GN=Eif6 PE=1 SV=2	2	27210164	27390584	10343194	25577327	23605530	18835418	22891922	19738155	2.01886e+07
O55137	Acyl-coenzyme A thioesterase 1 OS=Mus musculus OX=10090 GN=Acot1 PE=1 SV=1	8	179618374	152498316	1.67476e+08	1.44371e+08	164033424	1.45172e+08	157864121	160822382	1.68801e+08
O55143	Sarcoplasmic/endoplasmic reticulum calcium ATPase 2 OS=Mus musculus OX=10090 GN=Atp2a2 PE=1 SV=2	31	2152520608	1090958646	8.02275e+08	1976747948	1310049353	1305238791	1356976974	1466425682	1409130047
O55201	Transcription elongation factor SPT5 OS=Mus musculus OX=10090 GN=Supt5h PE=1 SV=1	1						3.83835e+06		3.49323e+06	3.7833e+06
O55222	Integrin-linked protein kinase OS=Mus musculus OX=10090 GN=Ilk PE=1 SV=2	2	1.11282e+07	1.17585e+07	9.19076e+06	8.89173e+06	9.6694e+06	7.71398e+06	8.0388e+06	9.19319e+06	9.81965e+06
O55234	Proteasome subunit beta type-5 OS=Mus musculus OX=10090 GN=Psmb5 PE=1 SV=3	12	7.54815e+08	7.91854e+08	601411207	770194530	8.79645e+08	735683841	768936209	8.10672e+08	754113224
O70133	ATP-dependent RNA helicase A OS=Mus musculus OX=10090 GN=Dhx9 PE=1 SV=2	29	1023897628	9.34452e+08	5.61284e+08	5.64343e+08	7.84442e+08	6.2639e+08	6.4613e+08	6.68639e+08	718815569
O70161	Phosphatidylinositol 4-phosphate 5-kinase type-1 gamma OS=Mus musculus OX=10090 GN=Pip5k1c PE=1 SV=2	13	3.15199e+08	3.4288e+08	2.75897e+08	2.31361e+08	216090747	1.59872e+08	241757006	193497116	2.19485e+08
O70172	Phosphatidylinositol 5-phosphate 4-kinase type-2 alpha OS=Mus musculus OX=10090 GN=Pip4k2a PE=1 SV=1	5	67706997	59709428	7.59982e+07	9.04065e+07	1.0111e+08	5.95208e+07	51296067	8.56329e+07	8.677e+07
O70194	Eukaryotic translation initiation factor 3 subunit D OS=Mus musculus OX=10090 GN=Eif3d PE=1 SV=2	7	1.26961e+08	6.54634e+07	7.6675e+07	75842768	84330952	5.8267e+07	6.65876e+07	83579070	9.14504e+07
O70228	Probable phospholipid-transporting ATPase IIA OS=Mus musculus OX=10090 GN=Atp9a PE=1 SV=3	2	25212318	23787256	9621403	20068624	19578351	15167428	21359709	17242990	20921372
O70251	Elongation factor 1-beta OS=Mus musculus OX=10090 GN=Eef1b PE=1 SV=5	3	247730125	190183683	120696032	106307210	113876671	75334747	132192120	1.23463e+08	1.17799e+08
O70252	Heme oxygenase 2 OS=Mus musculus OX=10090 GN=Hmox2 PE=1 SV=1	1	11032037	9318040	4.35317e+06		3.87319e+06		6.32239e+06	5808430	3.63163e+06
O70305	Ataxin-2 OS=Mus musculus OX=10090 GN=Atxn2 PE=1 SV=1	7	7.36897e+07	76524070	2.73086e+07	6.01718e+07	5.32586e+07	57749228	4.88578e+07	5.27195e+07	56007009
O70310	Glycylpeptide N-tetradecanoyltransferase 1 OS=Mus musculus OX=10090 GN=Nmt1 PE=1 SV=1	10	3.05211e+08	2.81449e+08	1.9363e+08	1.29147e+08	1.48213e+08	1.26952e+08	190926083	1.97748e+08	1.96494e+08
O70311	Glycylpeptide N-tetradecanoyltransferase 2 OS=Mus musculus OX=10090 GN=Nmt2 PE=1 SV=1	6	36271231	3.23472e+07	23496817	2.31695e+07	3.38854e+07	2.27768e+07	34256104	2.96231e+07	2.757e+07
O70318	Band 4.1-like protein 2 OS=Mus musculus OX=10090 GN=Epb41l2 PE=1 SV=2	10	187590364	1.51673e+08	1.31471e+08	152529153	1.41202e+08	1.47346e+08	163488125	1.65678e+08	147934553
O70378	ER membrane protein complex subunit 8 OS=Mus musculus OX=10090 GN=Emc8 PE=1 SV=1	1	11651643	7.56233e+06	4.91158e+06	9242718	10182054	5.67955e+06	6900202	8594400	8.20838e+06
O70435	Proteasome subunit alpha type-3 OS=Mus musculus OX=10090 GN=Psma3 PE=1 SV=3	5	134217783	9.03177e+07	92829069	83794195	8.99867e+07	9.22132e+07	9.50051e+07	1.07229e+08	77936791
O70439	Syntaxin-7 OS=Mus musculus OX=10090 GN=Stx7 PE=1 SV=3	3	21134893	16219828	1.80687e+06	4355688	1.94548e+07	3.06424e+06	1.37194e+07	1.10414e+07	8.88533e+06
O70443	Guanine nucleotide-binding protein G(z) subunit alpha OS=Mus musculus OX=10090 GN=Gnaz PE=1 SV=4	11	403563835	3.15809e+08	254519084	328724058	323248871	2.87057e+08	338235399	335693749	3.39539e+08
O70451	Monocarboxylate transporter 2 OS=Mus musculus OX=10090 GN=Slc16a7 PE=1 SV=1	1	8151874	6155420	4503050	1.85439e+06	9919522	4.22434e+06	6438579	5.36816e+06	3968347
O70492	Sorting nexin-3 OS=Mus musculus OX=10090 GN=Snx3 PE=1 SV=3	6	504781850	498574861	364625008	89647353	100377717	91371770	257257220	250561838	261864540
O70493	Sorting nexin-12 OS=Mus musculus OX=10090 GN=Snx12 PE=1 SV=1	7	375544498	3.16454e+08	2.02423e+08	2.36421e+08	251905615	215255631	2.64872e+08	2.57866e+08	263540525
O70503	Very-long-chain 3-oxoacyl-CoA reductase OS=Mus musculus OX=10090 GN=Hsd17b12 PE=1 SV=1	5	7.61593e+07	4.47344e+07	24377354	4.77431e+07	3.98455e+07	3.59689e+07	4.2676e+07	4.45605e+07	4.2555e+07
O70589	Peripheral plasma membrane protein CASK OS=Mus musculus OX=10090 GN=Cask PE=1 SV=2	18	3.67322e+08	2.95677e+08	2.16026e+08	3.01592e+08	2.96602e+08	232095156	2.7589e+08	2.73314e+08	2.88041e+08
O70591	Prefoldin subunit 2 OS=Mus musculus OX=10090 GN=Pfdn2 PE=1 SV=2	9	2.71215e+08	285744756	2.15269e+08	9.55539e+07	160643555	5.09615e+07	1.67271e+08	1.61267e+08	1.85945e+08
O88307	Sortilin-related receptor OS=Mus musculus OX=10090 GN=Sorl1 PE=1 SV=3	4	1.92576e+07	1.42563e+07	1.37448e+07	23246107	2.34089e+07	1.45265e+07	14397186	9.18561e+06	9.42832e+06
O88342	WD repeat-containing protein 1 OS=Mus musculus OX=10090 GN=Wdr1 PE=1 SV=3	29	2632774118	2251243649	2143157022	2198708446	2280418067	2209487189	2236985497	2272845998	2354124206
O88343	Electrogenic sodium bicarbonate cotransporter 1 OS=Mus musculus OX=10090 GN=Slc4a4 PE=1 SV=2	9	2.04494e+08	158411483	1.05024e+08	8.12861e+07	1.04223e+08	8.08484e+07	1.01186e+08	9.71574e+07	1.03247e+08
O88444	Adenylate cyclase type 1 OS=Mus musculus OX=10090 GN=Adcy1 PE=1 SV=2	1	4.34885e+06	3.10947e+06	2.93765e+06	3.13017e+06		3395789	3.06244e+06	3207955	2.98588e+06
O88448	Kinesin light chain 2 OS=Mus musculus OX=10090 GN=Klc2 PE=1 SV=1	3	41273054	3.32953e+07	18245316	2.84336e+07	1.88819e+07	14926287	31582780	2.14289e+07	23698632
O88455	7-dehydrocholesterol reductase OS=Mus musculus OX=10090 GN=Dhcr7 PE=1 SV=1	2	22314946	1.61691e+07	1.51058e+07	12713104	23842052	1.31072e+07	1.69723e+07	18573645	1.41756e+07
O88485	Cytoplasmic dynein 1 intermediate chain 1 OS=Mus musculus OX=10090 GN=Dync1i1 PE=1 SV=2	15	3.9063e+08	333389073	232602482	2.99808e+08	3.13703e+08	278555925	3.13883e+08	2.79438e+08	2.9661e+08
O88487	Cytoplasmic dynein 1 intermediate chain 2 OS=Mus musculus OX=10090 GN=Dync1i2 PE=1 SV=1	8	116635130	119882133	6.71008e+07	116743121	122659494	1.19015e+08	90497147	93565886	102191622
O88507	Ciliary neurotrophic factor receptor subunit alpha OS=Mus musculus OX=10090 GN=Cntfr PE=1 SV=2	4	66418461	47780867	29046879	50843900	44743640	3.90354e+07	34951703	35949051	31813373
O88522	NF-kappa-B essential modulator OS=Mus musculus OX=10090 GN=Ikbkg PE=1 SV=2	1	6068632						2.8619e+06
O88531	Palmitoyl-protein thioesterase 1 OS=Mus musculus OX=10090 GN=Ppt1 PE=1 SV=2	5	55059954	51360638	3.10883e+07	4.52207e+07	4.18296e+07	3.3459e+07	45415112	4.43698e+07	38166727
O88532	Zinc finger RNA-binding protein OS=Mus musculus OX=10090 GN=Zfr PE=1 SV=2	2	15153881	1.61254e+07	9.92136e+06	5016950	5055781	11214237	1.22109e+07	5.82707e+06	1.43225e+07
O88533	Aromatic-L-amino-acid decarboxylase OS=Mus musculus OX=10090 GN=Ddc PE=1 SV=1	4	2.16501e+07	1.66414e+07	9.08966e+06	36819133	3.64943e+07	2.29106e+07	1.7791e+07	2.82568e+07	1.78567e+07
O88543	COP9 signalosome complex subunit 3 OS=Mus musculus OX=10090 GN=Cops3 PE=1 SV=3	7	94101207	77423940	7.85784e+07	58878864	145922295	7.26988e+07	7.21252e+07	55811556	86937678
O88545	COP9 signalosome complex subunit 6 OS=Mus musculus OX=10090 GN=Cops6 PE=1 SV=1	3	59609623	24267935	22089795	32631687	35362390	15832428	27914003	42718420	36077797
O88569	Heterogeneous nuclear ribonucleoproteins A2/B1 OS=Mus musculus OX=10090 GN=Hnrnpa2b1 PE=1 SV=2	21	6.41837e+08	4.94858e+08	4.34498e+08	3.56474e+08	4.22781e+08	3.04144e+08	4.07697e+08	4.39275e+08	4.63955e+08
O88602	Voltage-dependent calcium channel gamma-2 subunit OS=Mus musculus OX=10090 GN=Cacng2 PE=1 SV=1	1	19346404	9622398		9412598	13653142	8.2176e+06	9394923		7.88538e+06
O88643	Serine/threonine-protein kinase PAK 1 OS=Mus musculus OX=10090 GN=Pak1 PE=1 SV=1	10	308425541	2.33689e+08	118015216	61606876	54208056	6.57125e+07	1.03421e+08	1.07826e+08	1.26514e+08
O88685	26S proteasome regulatory subunit 6A OS=Mus musculus OX=10090 GN=Psmc3 PE=1 SV=2	7	111852675	104350952	1.01502e+08	6.69211e+07	9.00297e+07	5.55823e+07	9.20493e+07	7.86869e+07	8.13191e+07
O88703	Potassium/sodium hyperpolarization-activated cyclic nucleotide-gated channel 2 OS=Mus musculus OX=10090 GN=Hcn2 PE=1 SV=1	1	8905816	4.79121e+06		6.72756e+06	5.33619e+06	5346855	4984659	7766787	4.44632e+06
O88704	Potassium/sodium hyperpolarization-activated cyclic nucleotide-gated channel 1 OS=Mus musculus OX=10090 GN=Hcn1 PE=1 SV=1	5	7.35267e+07	7.36545e+07	6.26478e+07	56648616	57064736	5.04212e+07	5.11456e+07	6.49956e+07	4.87802e+07
O88712	C-terminal-binding protein 1 OS=Mus musculus OX=10090 GN=Ctbp1 PE=1 SV=2	10	3.74969e+08	294959666	2.71021e+08	278362019	246534301	212908509	244457204	3.00779e+08	2.7503e+08
O88735	Ensconsin OS=Mus musculus OX=10090 GN=Map7 PE=1 SV=1	3	115153527	1.03681e+08	27976130	102529053	98498648	73348672	8.55013e+07	9.45336e+07	8.13187e+07
O88737	Protein bassoon OS=Mus musculus OX=10090 GN=Bsn PE=1 SV=4	48	8.75858e+08	6.72677e+08	3.58664e+08	396617098	4.73552e+08	3.62324e+08	4.81245e+08	5.44242e+08	5.08743e+08
O88738	Baculoviral IAP repeat-containing protein 6 OS=Mus musculus OX=10090 GN=Birc6 PE=1 SV=2	4	20849119	11841284	13295402	8331258	9119843	1.31337e+07	1.25865e+07	1.07772e+07	1.78264e+07
O88809	Neuronal migration protein doublecortin OS=Mus musculus OX=10090 GN=Dcx PE=1 SV=1	2	1.84721e+07	1.70937e+07	16103007	9.47978e+06	1.09143e+07	7.18652e+06	1.14537e+07	7.41181e+06	11431779
O88851	Putative hydrolase RBBP9 OS=Mus musculus OX=10090 GN=Rbbp9 PE=1 SV=2	5	1.04241e+08	8.54376e+07	7.57201e+07	8.02465e+07	8.48309e+07	6.10582e+07	82445091	73816747	7.3806e+07
O88910	MAGUK p55 subfamily member 3 OS=Mus musculus OX=10090 GN=Mpp3 PE=1 SV=2	1	7848795	4.00238e+06	4.42255e+06	4927043	4513857	3895465	4073367	3.58009e+06
O88935	Synapsin-1 OS=Mus musculus OX=10090 GN=Syn1 PE=1 SV=2	35	6543989544	4913467676	4031441012	4963567737	4732268763	4245048847	4836944757	4722059812	4752367450
O88958	Glucosamine-6-phosphate isomerase 1 OS=Mus musculus OX=10090 GN=Gnpda1 PE=1 SV=3	4	89299941	5.34071e+07	53326866	81686363	51509500	38432665	43542069	42586651	8.01701e+07
O89029	Matrilin-4 OS=Mus musculus OX=10090 GN=Matn4 PE=1 SV=1	5	49464286	5.09609e+07	3.58274e+07	4.4287e+07	4.81454e+07	4.12202e+07	4.83715e+07	4.60401e+07	5.28965e+07
O89053	Coronin-1A OS=Mus musculus OX=10090 GN=Coro1a PE=1 SV=5	16	1148698974	1011908900	518557683	9.55416e+08	1003328814	8.73313e+08	891582806	9.34227e+08	9.50513e+08
O89079	Coatomer subunit epsilon OS=Mus musculus OX=10090 GN=Cope PE=1 SV=3	2	1.29961e+07	8623611	6.85224e+06	7968885	7600379		7.61114e+06	1.21824e+07	4.86509e+06
O89112	LanC-like protein 1 OS=Mus musculus OX=10090 GN=Lancl1 PE=1 SV=1	7	317282379	292031607	2.39218e+08	313316586	293986173	2.47131e+08	272095222	3.02149e+08	282004014
P00493	Hypoxanthine-guanine phosphoribosyltransferase OS=Mus musculus OX=10090 GN=Hprt1 PE=1 SV=3	6	158289778	134285654	99007041	1.26402e+08	1.39289e+08	132224979	136820483	130572486	139390649
P00920	Carbonic anhydrase 2 OS=Mus musculus OX=10090 GN=Ca2 PE=1 SV=4	13	9.6624e+08	772155908	505064315	7.58302e+08	752097816	6.86945e+08	7.21522e+08	728776906	6.81238e+08
P01027	Complement C3 OS=Mus musculus OX=10090 GN=C3 PE=1 SV=3	12	1.26163e+08	88201399	7.36251e+07	9.96444e+07	91835162	8.35958e+07	9.21354e+07	98140865	1.04213e+08
P01831	Thy-1 membrane glycoprotein OS=Mus musculus OX=10090 GN=Thy1 PE=1 SV=1	4	2.57921e+08	2.10565e+08	174198367	1.61481e+08	158319364	110701459	1.69664e+08	1.68468e+08	187849807
P01865	Ig gamma-2A chain C region, membrane-bound form OS=Mus musculus OX=10090 GN=Igh-1a PE=1 SV=3	1	21754886		37643712	12293005	14673638	14382881	19971342	14015743
P01869	Ig gamma-1 chain C region, membrane-bound form OS=Mus musculus OX=10090 GN=Ighg1 PE=1 SV=2	2	1.69969e+06	1.19682e+07	17410394	14984998	20907322	34923400	18065647	23678447	1.73166e+07
P01942	Hemoglobin subunit alpha OS=Mus musculus OX=10090 GN=Hba PE=1 SV=2	9	7744378697	7937233352	5990460831	5647543196	6080158131	4278184892	6059720628	6294747671	6232238454
P02088	Hemoglobin subunit beta-1 OS=Mus musculus OX=10090 GN=Hbb-b1 PE=1 SV=2	17	13097704037	13502739475	7781580025	10577408435	10826999079	7746993006	10091517566	10336047277	10385223038
P02089	Hemoglobin subunit beta-2 OS=Mus musculus OX=10090 GN=Hbb-b2 PE=1 SV=2	7	1246646647	1230145006	848479276	8.56103e+08	8.3962e+08	637274501	8.63482e+08	8.71415e+08	8.61134e+08
P02301	Histone H3.3C OS=Mus musculus OX=10090 GN=H3f3c PE=3 SV=3	4	336126704	382633924	448273452	303828152	510238840	301626876	452837116	464909812	415081744
P03995	Glial fibrillary acidic protein OS=Mus musculus OX=10090 GN=Gfap PE=1 SV=4	4	79668101	153203021	160994896	100028909	8.98123e+07	9.47764e+07	1.1942e+08	1.14992e+08	1.07932e+08
P04370	Myelin basic protein OS=Mus musculus OX=10090 GN=Mbp PE=1 SV=2	10	3653921429	2623395273	2509909170	2902930137	3072827761	1807306517	2739366249	2785545115	2739478140
P04443	Hemoglobin subunit beta-H0 OS=Mus musculus OX=10090 GN=Hbb-bh0 PE=2 SV=5	1	32926180		14306052		4763161	16885388	9547389	9955559	13100227
P04627	Serine/threonine-protein kinase A-Raf OS=Mus musculus OX=10090 GN=Araf PE=1 SV=2	5	1.14272e+08	105023945	8.10555e+07	9.70337e+07	98576729	7.82514e+07	1.05562e+08	85705849	86067155
P04925	Major prion protein OS=Mus musculus OX=10090 GN=Prnp PE=1 SV=2	2	8802482		8494043	1.27711e+07	1.15541e+07	4489805	12505812	5494563	11525590
P05063	Fructose-bisphosphate aldolase C OS=Mus musculus OX=10090 GN=Aldoc PE=1 SV=4	42	7227381788	5911877200	5056190084	5982371162	5942342240	4930094422	5806833685	5815609036	5861832015
P05064	Fructose-bisphosphate aldolase A OS=Mus musculus OX=10090 GN=Aldoa PE=1 SV=2	39	15228221513	12666812006	10753041783	12891839332	13225976237	11139220711	12127529764	12669114724	12720892789
P05132	cAMP-dependent protein kinase catalytic subunit alpha OS=Mus musculus OX=10090 GN=Prkaca PE=1 SV=3	5	212365822	188564253	1.7096e+08	1.5904e+08	1.91887e+08	1.58417e+08	169477792	174724619	1.73891e+08
P05201	Aspartate aminotransferase, cytoplasmic OS=Mus musculus OX=10090 GN=Got1 PE=1 SV=3	31	3918043888	2948773879	2518865372	3074025463	3035280805	2778911891	2938319945	2957865904	2993785999
P05480	Neuronal proto-oncogene tyrosine-protein kinase Src OS=Mus musculus OX=10090 GN=Src PE=1 SV=4	13	378412559	3.06983e+08	218255932	308972648	3.56048e+08	264949927	3.01132e+08	2.90614e+08	3.08036e+08
P05532	Mast/stem cell growth factor receptor Kit OS=Mus musculus OX=10090 GN=Kit PE=1 SV=3	1	10091317	5487041		6.47056e+06	5326327	4.53849e+06	7.27912e+06	4027668	4.09799e+06
P06151	L-lactate dehydrogenase A chain OS=Mus musculus OX=10090 GN=Ldha PE=1 SV=3	24	4946560910	4285525953	3653211394	4201034759	4764792748	4040181979	4174184180	4312705607	4387504551
P06797	Cathepsin L1 OS=Mus musculus OX=10090 GN=Ctsl PE=1 SV=2	1	14816600	13281715		11390677	16529051	10572792	11691206	10620996	9495527
P06837	Neuromodulin OS=Mus musculus OX=10090 GN=Gap43 PE=1 SV=1	16	2706528763	3038215909	6.31505e+08	2582336189	2780517302	1937797745	2224077190	2210410079	2306317794
P06880	Somatotropin OS=Mus musculus OX=10090 GN=Gh1 PE=2 SV=1	2	4.23043e+06	1.24516e+06		3.09733e+06	4646324	27649962	7.47775e+06	2.85694e+06	8.1066e+06
P06909	Complement factor H OS=Mus musculus OX=10090 GN=Cfh PE=1 SV=2	1	14639219	14498932	9117234	19031288	20134052	16455219	16209744	15313961	20953948
P07310	Creatine kinase M-type OS=Mus musculus OX=10090 GN=Ckm PE=1 SV=1	1	3.06489e+06	4.51494e+06		5.46693e+06	3.63457e+06	4575662	4651145	5738405	3.38651e+06
P07356	Annexin A2 OS=Mus musculus OX=10090 GN=Anxa2 PE=1 SV=2	7	90110568	5.86563e+07	73581770	3.02608e+07	4.5751e+07	70107137	74484664	7.21216e+07	71239507
P07724	Serum albumin OS=Mus musculus OX=10090 GN=Alb PE=1 SV=3	20	2681490290	2739671459	1874243944	2103511255	2464386872	1585813410	2143166464	2149894531	2118978949
P07758	Alpha-1-antitrypsin 1-1 OS=Mus musculus OX=10090 GN=Serpina1a PE=1 SV=4	2	1.91161e+07	3.02934e+07	34840056	5711958		6.93998e+06	1.98128e+07	9.39832e+06	15630994
P07759	Serine protease inhibitor A3K OS=Mus musculus OX=10090 GN=Serpina3k PE=1 SV=2	8	191361411	159719541	3.37998e+08	121585125	1.27966e+08	122997095	1.50911e+08	1.85376e+08	160151904
P07901	Heat shock protein HSP 90-alpha OS=Mus musculus OX=10090 GN=Hsp90aa1 PE=1 SV=4	29	2665370132	1800667223	1603499965	1944971938	1903674046	1638582868	1900733781	1913193500	1923517200
P08003	Protein disulfide-isomerase A4 OS=Mus musculus OX=10090 GN=Pdia4 PE=1 SV=3	7	92198802	43784966	31601751	4.1939e+07	4.57394e+07	49521639	4.22883e+07	56703476	5.88299e+07
P08113	Endoplasmin OS=Mus musculus OX=10090 GN=Hsp90b1 PE=1 SV=2	26	6.02712e+08	5.0483e+08	4.84901e+08	5.20313e+08	4.68371e+08	414628948	4.82634e+08	4.81049e+08	4.50278e+08
P08122	Collagen alpha-2(IV) chain OS=Mus musculus OX=10090 GN=Col4a2 PE=1 SV=4	2	10038676	2.1671e+07	7.94944e+06	6427448	1.47212e+07	7.16459e+06	9481181	10287691	1.32546e+07
P08414	Calcium/calmodulin-dependent protein kinase type IV OS=Mus musculus OX=10090 GN=Camk4 PE=1 SV=2	16	7.60554e+08	6.35129e+08	5.16336e+08	6.82028e+08	6.53384e+08	5.65198e+08	6.20557e+08	627991883	6.34952e+08
P08551	Neurofilament light polypeptide OS=Mus musculus OX=10090 GN=Nefl PE=1 SV=5	21	5.50527e+08	4.47783e+08	3.36314e+08	447518607	494012155	4.10985e+08	428318183	4.67386e+08	4.15968e+08
P08553	Neurofilament medium polypeptide OS=Mus musculus OX=10090 GN=Nefm PE=1 SV=4	38	2453046523	2329146624	1641348454	7.82118e+08	7.85789e+08	6.37726e+08	1310915011	1423579223	1415104964
P08752	Guanine nucleotide-binding protein G(i) subunit alpha-2 OS=Mus musculus OX=10090 GN=Gnai2 PE=1 SV=5	14	7.97217e+08	664264515	7.35643e+08	7.06819e+08	7.6361e+08	6.93373e+08	6.9248e+08	656189334	7.19817e+08
P09055	Integrin beta-1 OS=Mus musculus OX=10090 GN=Itgb1 PE=1 SV=1	4	1.14332e+07	2.36522e+07	1.75968e+07	2.65619e+07	28327456	16403359	1.95593e+07	2.61194e+07	19512128
P09411	Phosphoglycerate kinase 1 OS=Mus musculus OX=10090 GN=Pgk1 PE=1 SV=4	33	4828772155	4279819569	3782049258	4530989405	4672555702	3689658474	4170914160	4163902622	4354774403
P0C027	Diphosphoinositol polyphosphate phosphohydrolase 3-alpha OS=Mus musculus OX=10090 GN=Nudt10 PE=1 SV=1	1	6.02402e+06	10830108	5300725	8179527	8323973	7365193	6.589e+06	7.31107e+06	7554426
P0C192	Leucine-rich repeat-containing protein 4B OS=Mus musculus OX=10090 GN=Lrrc4b PE=1 SV=1	2	23111503	18020375	4114429	13737104	1.50712e+07	11711928	13837338	12320938	7.36173e+06
P0C7L0	WAS/WASL-interacting protein family member 3 OS=Mus musculus OX=10090 GN=Wipf3 PE=1 SV=1	3	48211757	49717147	4.43206e+07	2.54439e+07	2.03031e+07	1.56418e+07	25987846	3.13462e+07	32459457
P0DP27	Calmodulin-2 OS=Mus musculus OX=10090 GN=Calm2 PE=1 SV=1	6	289914961	250682054	22383437		32783541	8788120	9.04751e+07	1.03861e+08	1.03755e+08
P10126	Elongation factor 1-alpha 1 OS=Mus musculus OX=10090 GN=Eef1a1 PE=1 SV=3	17	3616465530	3155429834	2415462504	3025862341	3135221596	2783736948	2864718592	2890621460	2960780600
P10518	Delta-aminolevulinic acid dehydratase OS=Mus musculus OX=10090 GN=Alad PE=1 SV=1	7	98158518	7.36901e+07	47849552	7.74972e+07	7.70892e+07	6.48866e+07	8.08474e+07	6.86153e+07	66913336
P10605	Cathepsin B OS=Mus musculus OX=10090 GN=Ctsb PE=1 SV=2	2	4.48409e+07	35296391	44627353	37404276	3.80439e+07	33013945	3.16607e+07	5.44736e+07	30333262
P10630	Eukaryotic initiation factor 4A-II OS=Mus musculus OX=10090 GN=Eif4a2 PE=1 SV=2	10	6.96679e+08	5.81769e+08	4.84425e+08	5.75234e+08	5.65338e+08	4.82986e+08	530958101	541556436	5.36666e+08
P10637	Microtubule-associated protein tau OS=Mus musculus OX=10090 GN=Mapt PE=1 SV=3	46	14898456894	9565673549	7356827568	2114757308	1967164911	1486034581	5591955594	5752207994	5717200291
P10639	Thioredoxin OS=Mus musculus OX=10090 GN=Txn PE=1 SV=3	2	59210942	60751282	27794529	53689421	63904456	45857523	43948269	48838414	50074615
P10649	Glutathione S-transferase Mu 1 OS=Mus musculus OX=10090 GN=Gstm1 PE=1 SV=2	17	1074002215	8.36997e+08	7.26667e+08	5.64735e+08	5.87034e+08	4.66624e+08	6.24416e+08	6.40659e+08	6.62938e+08
P10833	Ras-related protein R-Ras OS=Mus musculus OX=10090 GN=Rras PE=1 SV=1	1	11324449		891451	2289462	17315286		5968968
P10852	4F2 cell-surface antigen heavy chain OS=Mus musculus OX=10090 GN=Slc3a2 PE=1 SV=1	18	908107272	6.84993e+08	524025944	8.14396e+08	709526347	6.3347e+08	7.12867e+08	6.74933e+08	7.05988e+08
P10853	Histone H2B type 1-F/J/L OS=Mus musculus OX=10090 GN=Hist1h2bf PE=1 SV=2	6	4.23846e+08	5.35286e+08	553401794	283512526	392030050	286641557	401186502	3.98315e+08	432092982
P11404	Fatty acid-binding protein, heart OS=Mus musculus OX=10090 GN=Fabp3 PE=1 SV=5	8	161664504	1.73784e+08	1.54289e+08	118102258	172514869	1.5676e+08	132196356	1.53857e+08	1.59301e+08
P11438	Lysosome-associated membrane glycoprotein 1 OS=Mus musculus OX=10090 GN=Lamp1 PE=1 SV=2	2	71949354	47322801	2.86835e+07	62263040	57207596	45719078	52245044	55278888	56246518
P11499	Heat shock protein HSP 90-beta OS=Mus musculus OX=10090 GN=Hsp90ab1 PE=1 SV=3	46	9342387700	7310030844	5926191516	7196370238	7112432407	6051392733	6796897961	6884848484	7323126506
P11627	Neural cell adhesion molecule L1 OS=Mus musculus OX=10090 GN=L1cam PE=1 SV=1	19	6.35727e+08	509682256	3.49285e+08	513581224	6.48666e+08	4.66167e+08	492567811	444025414	5.39234e+08
P11798	Calcium/calmodulin-dependent protein kinase type II subunit alpha OS=Mus musculus OX=10090 GN=Camk2a PE=1 SV=2	22	4747761633	3966898697	4460768156	3105384146	3401210076	3162986030	3739902365	3817030639	3775398246
P11881	Inositol 1,4,5-trisphosphate receptor type 1 OS=Mus musculus OX=10090 GN=Itpr1 PE=1 SV=2	67	2005623526	1806769796	1181478744	1964106102	2168864524	1749118192	1788082328	1833024493	1741463970
P11983	T-complex protein 1 subunit alpha OS=Mus musculus OX=10090 GN=Tcp1 PE=1 SV=3	22	1152994010	9.57998e+08	911714679	1024434317	1090517915	9.43867e+08	989655774	1023364331	1046972692
P12023	Amyloid-beta A4 protein OS=Mus musculus OX=10090 GN=App PE=1 SV=3	5	6.684e+07	52836016	4.68002e+07	5.01662e+07	5.55882e+07	3.80591e+07	4.16171e+07	5.92342e+07	5.11351e+07
P12367	cAMP-dependent protein kinase type II-alpha regulatory subunit OS=Mus musculus OX=10090 GN=Prkar2a PE=1 SV=2	20	2710606055	2153038854	1665216562	5.81931e+08	5.31049e+08	4.19048e+08	1224674335	1231056059	1283788376
P12382	ATP-dependent 6-phosphofructokinase, liver type OS=Mus musculus OX=10090 GN=Pfkl PE=1 SV=4	19	6.80967e+08	5.02573e+08	3.98689e+08	512842181	5.73503e+08	5.22242e+08	5.22243e+08	5.39905e+08	552292745
P12658	Calbindin OS=Mus musculus OX=10090 GN=Calb1 PE=1 SV=2	2	31277946	28114198	148279328	33832084	36436051	74746912	66338994	58374776	5.95234e+07
P12849	cAMP-dependent protein kinase type I-beta regulatory subunit OS=Mus musculus OX=10090 GN=Prkar1b PE=1 SV=2	3	18887403	21379517	15013563	1.82406e+07	2.04841e+07	1.48348e+07	18750489	1.52086e+07	1.50774e+07
P12960	Contactin-1 OS=Mus musculus OX=10090 GN=Cntn1 PE=1 SV=1	56	5037762544	4517705591	4021643211	3692434930	4109796056	3529083888	4080313605	4008407371	4033086491
P12970	60S ribosomal protein L7a OS=Mus musculus OX=10090 GN=Rpl7a PE=1 SV=2	3	29833171	21311017	7.16337e+06	2.25673e+07	22606120	1.29149e+07	21157698	2.11547e+07	3.25755e+06
P13020	Gelsolin OS=Mus musculus OX=10090 GN=Gsn PE=1 SV=3	12	319082505	2.32783e+08	2.4652e+08	257956100	233828124	1.96848e+08	203362409	206177470	283838689
P13595	Neural cell adhesion molecule 1 OS=Mus musculus OX=10090 GN=Ncam1 PE=1 SV=3	47	8039610623	7322143085	4018876664	6581934562	7041743472	5722154109	6329900192	6446952923	6374777856
P13707	Glycerol-3-phosphate dehydrogenase [NAD(+)], cytoplasmic OS=Mus musculus OX=10090 GN=Gpd1 PE=1 SV=3	8	459415703	359103815	307349488	4.33784e+08	3.36648e+08	3.15603e+08	360502956	3.74138e+08	371699835
P14094	Sodium/potassium-transporting ATPase subunit beta-1 OS=Mus musculus OX=10090 GN=Atp1b1 PE=1 SV=1	21	7061589312	5469797425	3877463961	6235978518	6795157849	5844303705	5825969662	5592327537	5701336530
P14115	60S ribosomal protein L27a OS=Mus musculus OX=10090 GN=Rpl27a PE=1 SV=5	1	13319981	11232481	7779370	6761547	11087904	7.29477e+06	12272041	11567313	10417951
P14131	40S ribosomal protein S16 OS=Mus musculus OX=10090 GN=Rps16 PE=1 SV=4	9	2.53861e+08	217250316	192836243	199294406	232259040	1.64733e+08	2.16822e+08	211505752	2.06811e+08
P14148	60S ribosomal protein L7 OS=Mus musculus OX=10090 GN=Rpl7 PE=1 SV=2	2	8829273	13803603	9.2544e+06	5462074		4818147	1.18486e+07	6.95968e+06	6968638
P14206	40S ribosomal protein SA OS=Mus musculus OX=10090 GN=Rpsa PE=1 SV=4	4	65293895	63521406	74885254	4.90997e+07	49598318	55527613	60202468	66135209	63387295
P14211	Calreticulin OS=Mus musculus OX=10090 GN=Calr PE=1 SV=1	16	1225379541	968476012	524356623	9.21632e+08	9.84172e+08	7.73173e+08	890482327	9.1105e+08	8.91844e+08
P14231	Sodium/potassium-transporting ATPase subunit beta-2 OS=Mus musculus OX=10090 GN=Atp1b2 PE=1 SV=2	11	1741384181	1363952542	1172312558	1404517257	1546613201	1354040617	1529437461	1421266507	1448274359
P14685	26S proteasome non-ATPase regulatory subunit 3 OS=Mus musculus OX=10090 GN=Psmd3 PE=1 SV=3	10	152188390	1.48478e+08	9.26066e+07	1.32758e+08	1.75021e+08	109500724	130517142	1.19023e+08	136418812
P14733	Lamin-B1 OS=Mus musculus OX=10090 GN=Lmnb1 PE=1 SV=3	13	1.94916e+08	1.46405e+08	1.03081e+08	1.55847e+08	1.51987e+08	1.37914e+08	1.40407e+08	1.35129e+08	1.37723e+08
P14869	60S acidic ribosomal protein P0 OS=Mus musculus OX=10090 GN=Rplp0 PE=1 SV=3	3	61535756	51970035	4.36111e+07	43308749	60062826	43814816	55672475	52847779	48779602
P14873	Microtubule-associated protein 1B OS=Mus musculus OX=10090 GN=Map1b PE=1 SV=2	83	5554197711	3975385546	2286061170	2956808964	3057329661	2349993102	3211561868	3200693484	3305831538
P15105	Glutamine synthetase OS=Mus musculus OX=10090 GN=Glul PE=1 SV=6	20	4115969583	3612258573	2878112705	3587559824	3731649704	3260489832	3383938577	3483482943	3464228952
P15209	BDNF/NT-3 growth factors receptor OS=Mus musculus OX=10090 GN=Ntrk2 PE=1 SV=1	5	84986473	7.20873e+07	61768984	6.53641e+07	6.13929e+07	61294650	7.77877e+07	5.66758e+07	6.52025e+07
P15508	Spectrin beta chain, erythrocytic OS=Mus musculus OX=10090 GN=Sptb PE=1 SV=4	1		3.81228e+06		4552667	5.29508e+06	4.0854e+06
P15532	Nucleoside diphosphate kinase A OS=Mus musculus OX=10090 GN=Nme1 PE=1 SV=1	13	1248800332	1227427342	9.45956e+08	1088568820	1225382438	9.05162e+08	1042687823	1054449278	1062261786
P16045	Galectin-1 OS=Mus musculus OX=10090 GN=Lgals1 PE=1 SV=3	2	23155776	21392704		19028678	36805682	31348155	30881084	33789999	15929038
P16054	Protein kinase C epsilon type OS=Mus musculus OX=10090 GN=Prkce PE=1 SV=1	16	558304202	5.86937e+08	5.49328e+08	6.27865e+08	6.80967e+08	5.41475e+08	5.0869e+08	5.25357e+08	5.58302e+08
P16125	L-lactate dehydrogenase B chain OS=Mus musculus OX=10090 GN=Ldhb PE=1 SV=2	22	5326044125	4368896667	3567981855	4431071873	4324049883	3839719271	4228620579	4296710674	4379770171
P16330	2',3'-cyclic-nucleotide 3'-phosphodiesterase OS=Mus musculus OX=10090 GN=Cnp PE=1 SV=3	45	14949482208	11563571922	9323175175	12288878158	12650700610	10699872793	11330726885	11615498242	11484831444
P16388	Potassium voltage-gated channel subfamily A member 1 OS=Mus musculus OX=10090 GN=Kcna1 PE=1 SV=1	1	4086809	3.20045e+06	1.41718e+06	4.81645e+06	3746467	1.45442e+06	3.85736e+06	1.86869e+06	3.51524e+06
P16390	Potassium voltage-gated channel subfamily A member 3 OS=Mus musculus OX=10090 GN=Kcna3 PE=1 SV=3	5	85227408	51542878	34275801	80075846	50800855	6.11125e+07	63732132	67599697	66285877
P16460	Argininosuccinate synthase OS=Mus musculus OX=10090 GN=Ass1 PE=1 SV=1	8	239799136	220299536	185565591	1.71881e+08	1.69193e+08	1.44996e+08	1.81495e+08	185651425	1.8496e+08
P16546	Spectrin alpha chain, non-erythrocytic 1 OS=Mus musculus OX=10090 GN=Sptan1 PE=1 SV=4	147	5997999493	5943069752	3569577383	5740386187	6248118368	4788274515	5060863992	5107088068	5192293573
P16627	Heat shock 70 kDa protein 1-like OS=Mus musculus OX=10090 GN=Hspa1l PE=1 SV=4	1			14446070
P16675	Lysosomal protective protein OS=Mus musculus OX=10090 GN=Ctsa PE=1 SV=1	4	39514555	34519342	47104696	33528106	22550517	22282719	28075560	2.16351e+07	4.98634e+07
P16858	Glyceraldehyde-3-phosphate dehydrogenase OS=Mus musculus OX=10090 GN=Gapdh PE=1 SV=2	60	39375403867	37263194246	29788884427	35806657176	39688778040	32274077524	37767766730	35071845935	37595690863
P17047	Lysosome-associated membrane glycoprotein 2 OS=Mus musculus OX=10090 GN=Lamp2 PE=1 SV=2	2	43399702	38027644	2.3052e+07	32186734	34871407	2.69995e+07	32154602	3.2547e+07	31312410
P17156	Heat shock-related 70 kDa protein 2 OS=Mus musculus OX=10090 GN=Hspa2 PE=1 SV=2	7	8.3779e+07	7.34265e+07	5.1045e+07	7.27383e+07	6.97586e+07	6.20648e+07	7.71747e+07	79777032	6.53334e+07
P17182	Alpha-enolase OS=Mus musculus OX=10090 GN=Eno1 PE=1 SV=3	41	10051324654	7968442023	6421802982	7496207025	7866697483	6199837511	7433937294	7604016629	7636835686
P17183	Gamma-enolase OS=Mus musculus OX=10090 GN=Eno2 PE=1 SV=2	23	33664881451	38808748655	9008309068	50879920100	56624973653	36823676739	39220639251	39337125283	38540352589
P17225	Polypyrimidine tract-binding protein 1 OS=Mus musculus OX=10090 GN=Ptbp1 PE=1 SV=2	3	2.01288e+07	1.62821e+07	7.42067e+06	2.35545e+07	32233799	2.11315e+07	2.56771e+07	1.15061e+07	2.25108e+07
P17426	AP-2 complex subunit alpha-1 OS=Mus musculus OX=10090 GN=Ap2a1 PE=1 SV=1	39	3725253532	3087458081	2671530771	3203610827	3421662519	3047992441	2955792981	3117549996	3131697770
P17427	AP-2 complex subunit alpha-2 OS=Mus musculus OX=10090 GN=Ap2a2 PE=1 SV=2	30	1875580800	1572111981	1304156465	1601515913	1730000318	1520857808	1643208723	1569870950	1638151248
P17563	Methanethiol oxidase OS=Mus musculus OX=10090 GN=Selenbp1 PE=1 SV=2	8	145720217	1.27742e+08	8.33434e+07	1.15088e+08	142062878	127205282	1.20489e+08	96586425	114905899
P17710	Hexokinase-1 OS=Mus musculus OX=10090 GN=Hk1 PE=1 SV=3	29	1196285495	964536584	1045018894	9.78116e+08	1069994540	938282467	9.44453e+08	1025471607	957365556
P17742	Peptidyl-prolyl cis-trans isomerase A OS=Mus musculus OX=10090 GN=Ppia PE=1 SV=2	18	10972595215	9361033121	8339049526	8553231995	10536888798	8230136981	9136643661	8445841840	9784266292
P17809	Solute carrier family 2, facilitated glucose transporter member 1 OS=Mus musculus OX=10090 GN=Slc2a1 PE=1 SV=4	3	127596642	87727882	61750680	118969550	117072598	81219397	88699730	60099948	91700426
P17879	Heat shock 70 kDa protein 1B OS=Mus musculus OX=10090 GN=Hspa1b PE=1 SV=3	3	1.28581e+07	2.24258e+07	1.38604e+07	28551429	2.32737e+07	2.67729e+07	1.80134e+07	2.25352e+07	2.21023e+07
P18052	Receptor-type tyrosine-protein phosphatase alpha OS=Mus musculus OX=10090 GN=Ptpra PE=1 SV=3	4	3.4779e+07	2.62512e+07	38895619	3.96031e+07	2.92e+07	3.32539e+07	2.64568e+07	3.49184e+07	32934080
P18242	Cathepsin D OS=Mus musculus OX=10090 GN=Ctsd PE=1 SV=1	8	434307434	350715808	248113901	309661923	344867778	304293205	304229287	3.04285e+08	321048140
P18572	Basigin OS=Mus musculus OX=10090 GN=Bsg PE=1 SV=2	4	1.95785e+08	2.14656e+08	8.81589e+07	1.97487e+08	2.4854e+08	1.51127e+08	1.82976e+08	185906913	1.83764e+08
P18653	Ribosomal protein S6 kinase alpha-1 OS=Mus musculus OX=10090 GN=Rps6ka1 PE=1 SV=1	2	17038073	9461825	9.31061e+06	1.58881e+07	13827586	10793263	1.04065e+07	15268899	4.67494e+06
P18760	Cofilin-1 OS=Mus musculus OX=10090 GN=Cfl1 PE=1 SV=3	13	4211105951	4060102023	2501867886	3742717810	3886064816	3068263730	3239401110	3215394890	3355209633
P18872	Guanine nucleotide-binding protein G(o) subunit alpha OS=Mus musculus OX=10090 GN=Gnao1 PE=1 SV=3	31	14015031251	12186169784	10525912639	11505897642	11554038538	10778810494	11649260165	11589780236	11659633931
P19157	Glutathione S-transferase P 1 OS=Mus musculus OX=10090 GN=Gstp1 PE=1 SV=2	12	1200652990	1035183337	1050225065	8.64524e+08	8.11164e+08	7.61289e+08	782370952	9.41275e+08	969264750
P19246	Neurofilament heavy polypeptide OS=Mus musculus OX=10090 GN=Nefh PE=1 SV=3	13	275534313	2.3901e+08	1.641e+08	1.9882e+08	2.00985e+08	1.63955e+08	206172589	2.10195e+08	1.92019e+08
P19253	60S ribosomal protein L13a OS=Mus musculus OX=10090 GN=Rpl13a PE=1 SV=4	1	8690385	8676724	4303186	7.23612e+06	4.85218e+06	4.8617e+06	7820502	5.08685e+06	6061325
P20029	Endoplasmic reticulum chaperone BiP OS=Mus musculus OX=10090 GN=Hspa5 PE=1 SV=3	35	1414027334	1272637068	8.0777e+08	1271105295	1470338313	1034282612	1123034044	1187434703	1214673915
P20060	Beta-hexosaminidase subunit beta OS=Mus musculus OX=10090 GN=Hexb PE=1 SV=2	6	5.9535e+07	7.76812e+07	5.70472e+07	7.22142e+07	73791531	60473834	65385634	62999264	69811097
P20152	Vimentin OS=Mus musculus OX=10090 GN=Vim PE=1 SV=3	1	5593805	5.16532e+06	5193962	4.98715e+06	4440072	2969679	6.13326e+06	4.23919e+06	3.55372e+06
P20357	Microtubule-associated protein 2 OS=Mus musculus OX=10090 GN=Map2 PE=1 SV=2	195	63458694530	36415627724	15736886332	7974884998	6386400738	4440771658	19843581555	20794387758	20822426520
P20444	Protein kinase C alpha type OS=Mus musculus OX=10090 GN=Prkca PE=1 SV=3	5	31455135	3.61932e+07	3.53987e+07	14547335	3.29219e+07	4.25455e+07	3.9752e+07	29794256	27409462
P20917	Myelin-associated glycoprotein OS=Mus musculus OX=10090 GN=Mag PE=1 SV=2	9	686382727	549040259	3.6944e+08	623764919	665445321	5.23365e+08	5.46222e+08	5.39835e+08	544776509
P21278	Guanine nucleotide-binding protein subunit alpha-11 OS=Mus musculus OX=10090 GN=Gna11 PE=1 SV=1	7	2.13897e+08	1.41661e+08	1.53997e+08	1.47359e+08	155693713	1.42724e+08	1.66255e+08	190222180	1.96541e+08
P21279	Guanine nucleotide-binding protein G(q) subunit alpha OS=Mus musculus OX=10090 GN=Gnaq PE=1 SV=4	14	602867138	4.45075e+08	3.75376e+08	4.33002e+08	438929465	353244364	406310909	446415578	420043548
P21460	Cystatin-C OS=Mus musculus OX=10090 GN=Cst3 PE=1 SV=2	4	137860378	1.17867e+08	124693600	104125386	113933575	1.10552e+08	1.02375e+08	109252139	1.00892e+08
P21661	Neuroendocrine convertase 2 OS=Mus musculus OX=10090 GN=Pcsk2 PE=1 SV=1	2	1.31428e+07	12313167	2.67082e+07	10553478	2.5932e+07	2.92832e+06	24602704	5.4547e+06	1.30983e+07
P21956	Lactadherin OS=Mus musculus OX=10090 GN=Mfge8 PE=1 SV=3	2	7.29434e+06	4899328	4.68187e+06	5.06787e+06	8.10738e+06	3.91935e+06	6.05757e+06	7.8572e+06	7.91905e+06
P22315	Ferrochelatase, mitochondrial OS=Mus musculus OX=10090 GN=Fech PE=1 SV=2	9	1.92304e+08	1.36994e+08	98633576	6.01188e+07	8.77407e+07	61243421	105315452	9.52228e+07	1.00942e+08
P22723	Gamma-aminobutyric acid receptor subunit gamma-2 OS=Mus musculus OX=10090 GN=Gabrg2 PE=1 SV=3	4	47284539	2.50877e+07	81215197	3.32689e+07	39604844	31335965	3.22203e+07	3.34674e+07	34173315
P22892	AP-1 complex subunit gamma-1 OS=Mus musculus OX=10090 GN=Ap1g1 PE=1 SV=3	10	1.72816e+08	1.3747e+08	1.21503e+08	1.27875e+08	1.45904e+08	1.37292e+08	136476564	1.31641e+08	1.39661e+08
P23116	Eukaryotic translation initiation factor 3 subunit A OS=Mus musculus OX=10090 GN=Eif3a PE=1 SV=5	3	30607136	19963892	11562866	1.34973e+07	2.28136e+07	1.00083e+07	1.71745e+07	2.03468e+07	1.30726e+07
P23198	Chromobox protein homolog 3 OS=Mus musculus OX=10090 GN=Cbx3 PE=1 SV=2	3	42270208	65703502	1.74881e+07	5.35773e+07	4.86687e+07	27202539	4.29228e+07	33817403	34870509
P23242	Gap junction alpha-1 protein OS=Mus musculus OX=10090 GN=Gja1 PE=1 SV=2	10	541563258	482339346	4.55415e+08	4.28125e+08	566241029	525054616	470505739	463646577	4.89539e+08
P23492	Purine nucleoside phosphorylase OS=Mus musculus OX=10090 GN=Pnp PE=1 SV=2	9	128801156	128435233	1.16629e+08	113310068	145852900	124264650	128151785	1.11524e+08	1.22272e+08
P23506	Protein-L-isoaspartate(D-aspartate) O-methyltransferase OS=Mus musculus OX=10090 GN=Pcmt1 PE=1 SV=3	11	563834379	3.51304e+08	2.35729e+08	2.78435e+07	11826408	1.34604e+07	1.64589e+08	1.56623e+08	178391195
P23818	Glutamate receptor 1 OS=Mus musculus OX=10090 GN=Gria1 PE=1 SV=1	3	88701089	7.73409e+07	8.81996e+07	49002825	51609356	5.74924e+07	62486002	6.66089e+07	59376398
P23819	Glutamate receptor 2 OS=Mus musculus OX=10090 GN=Gria2 PE=1 SV=3	16	3.16941e+08	295854040	192537116	2.2074e+08	2.2117e+08	222591466	2.45642e+08	254169039	268137726
P23953	Carboxylesterase 1C OS=Mus musculus OX=10090 GN=Ces1c PE=1 SV=4	7	137898812	128770769	102541028	8.71705e+07	114092410	81847161	1.09204e+08	1.01375e+08	107034660
P24288	Branched-chain-amino-acid aminotransferase, cytosolic OS=Mus musculus OX=10090 GN=Bcat1 PE=1 SV=2	8	280879944	211267242	139420222	204307984	205260565	1.73056e+08	191054117	1.93773e+08	187834189
P24369	Peptidyl-prolyl cis-trans isomerase B OS=Mus musculus OX=10090 GN=Ppib PE=1 SV=2	2	4793757	30621319	2.02581e+07	4.34829e+06	7019938	4214800	41192461	5899347	5.33761e+06
P24527	Leukotriene A-4 hydrolase OS=Mus musculus OX=10090 GN=Lta4h PE=1 SV=4	19	471284267	3.85761e+08	607827956	3.47702e+08	3.72691e+08	3.33246e+08	3.58883e+08	3.87821e+08	3.54174e+08
P24549	Retinal dehydrogenase 1 OS=Mus musculus OX=10090 GN=Aldh1a1 PE=1 SV=5	8	1.00378e+08	74277317	5.4649e+07	68733896	1.34455e+08	87285211	1.14639e+08	8.47666e+07	81254153
P24668	Cation-dependent mannose-6-phosphate receptor OS=Mus musculus OX=10090 GN=M6pr PE=1 SV=1	2	1.96008e+07	14107214	1.35252e+07	1.45074e+07	14778288	1.12407e+07	1.53702e+07	1.64497e+07	9279282
P25444	40S ribosomal protein S2 OS=Mus musculus OX=10090 GN=Rps2 PE=1 SV=3	5	60828155	39711792	4.59939e+07	42059062	3.20694e+07	3.56068e+07	40495611	3.77339e+07	39687322
P26040	Ezrin OS=Mus musculus OX=10090 GN=Ezr PE=1 SV=3	3	3.10184e+07	25211774	1.67865e+07	19925207	2.20214e+07	2.26283e+07	22338721	2.69531e+07	2.335e+07
P26041	Moesin OS=Mus musculus OX=10090 GN=Msn PE=1 SV=3	14	3.50679e+08	2.50862e+08	2.40032e+08	2.34675e+08	2.09159e+08	1.82116e+08	2.37266e+08	272829472	2.68526e+08
P26043	Radixin OS=Mus musculus OX=10090 GN=Rdx PE=1 SV=3	6	5.82687e+07	4.3423e+07	2.11693e+07	2.10779e+07	3.342e+07	30276737	25384143	24044404	2.48544e+07
P26048	Gamma-aminobutyric acid receptor subunit alpha-2 OS=Mus musculus OX=10090 GN=Gabra2 PE=1 SV=1	1	6.8492e+06	7073680	4.65802e+06	4.86437e+06	7127941	4.82732e+06	6427036	6.51682e+06	6445000
P26049	Gamma-aminobutyric acid receptor subunit alpha-3 OS=Mus musculus OX=10090 GN=Gabra3 PE=1 SV=1	1									8.10061e+06
P26516	26S proteasome non-ATPase regulatory subunit 7 OS=Mus musculus OX=10090 GN=Psmd7 PE=1 SV=2	5	4.87027e+07	42270381	3.54822e+07	4.38459e+07	4.33273e+07	3.3576e+07	29274939	33907120	44195145
P26638	Serine--tRNA ligase, cytoplasmic OS=Mus musculus OX=10090 GN=Sars PE=1 SV=3	12	336492363	278269096	1.41233e+08	1.99197e+08	1.98584e+08	1.36929e+08	2.10854e+08	205186786	1.73935e+08
P26645	Myristoylated alanine-rich C-kinase substrate OS=Mus musculus OX=10090 GN=Marcks PE=1 SV=2	3	40299348	41482779	39966130	2.30417e+07	36846098	20987205	2.9957e+07	3.39019e+07	37826427
P26883	Peptidyl-prolyl cis-trans isomerase FKBP1A OS=Mus musculus OX=10090 GN=Fkbp1a PE=1 SV=2	4	225321959	229203333	192725335	2.64168e+08	289853657	178060293	231593302	236883836	2.38076e+08
P27546	Microtubule-associated protein 4 OS=Mus musculus OX=10090 GN=Map4 PE=1 SV=3	30	1689765420	1456008117	1154619511	5.86627e+08	678848895	4.73717e+08	9.10863e+08	9.88567e+08	9.61563e+08
P27601	Guanine nucleotide-binding protein subunit alpha-13 OS=Mus musculus OX=10090 GN=Gna13 PE=1 SV=1	6	61955422	6.03844e+07	6.47168e+07	5.47599e+07	5.13337e+07	35819149	5.2096e+07	50886298	5.29923e+07
P27612	Phospholipase A-2-activating protein OS=Mus musculus OX=10090 GN=Plaa PE=1 SV=4	15	328601449	249570253	1.75661e+08	1.91217e+08	1.71726e+08	1.59375e+08	2.05195e+08	1.81054e+08	2.14043e+08
P27659	60S ribosomal protein L3 OS=Mus musculus OX=10090 GN=Rpl3 PE=1 SV=3	6	1.01487e+08	7.25632e+07	5.11983e+07	5.95082e+07	51923409	4.72316e+07	6.33884e+07	72747241	6.24515e+07
P27661	Histone H2AX OS=Mus musculus OX=10090 GN=H2afx PE=1 SV=2	1	50353492	58893772	72232296	24220866	42632408	27141538	45059884	38780492	46694000
P27671	Ras-specific guanine nucleotide-releasing factor 1 OS=Mus musculus OX=10090 GN=Rasgrf1 PE=1 SV=2	5	8.09973e+08	7.18998e+08	384055091	8.35988e+08	880307739	551735872	1057370812	6.74825e+08	5.66938e+08
P27773	Protein disulfide-isomerase A3 OS=Mus musculus OX=10090 GN=Pdia3 PE=1 SV=2	17	621131423	4.74408e+08	338091496	444139542	4.94919e+08	3.09812e+08	5.84565e+08	4.56234e+08	397502269
P28028	Serine/threonine-protein kinase B-raf OS=Mus musculus OX=10090 GN=Braf PE=1 SV=3	1	28928654	23290572	15564006	15925423	18788078	16053883	20084846	21019840	17241424
P28352	DNA-(apurinic or apyrimidinic site) lyase OS=Mus musculus OX=10090 GN=Apex1 PE=1 SV=2	7	1.48005e+08	1.11557e+08	9.2289e+07	95862631	1.03106e+08	103680202	110759198	117284379	1.14818e+08
P28474	Alcohol dehydrogenase class-3 OS=Mus musculus OX=10090 GN=Adh5 PE=1 SV=3	6	259454929	2.28289e+08	187409499	3.1649e+08	2.58346e+08	3.36566e+08	224118843	232469259	220832880
P28571	Sodium- and chloride-dependent glycine transporter 1 OS=Mus musculus OX=10090 GN=Slc6a9 PE=1 SV=3	3	133220218	80960184	70504129	118630584	104980590	93717824	97482000	92668826	92322878
P28650	Adenylosuccinate synthetase isozyme 1 OS=Mus musculus OX=10090 GN=Adssl1 PE=1 SV=2	1	5.99418e+06							6262783
P28651	Carbonic anhydrase-related protein OS=Mus musculus OX=10090 GN=Ca8 PE=1 SV=5	4	2.10237e+08	139395981	1.04996e+08	165133524	151535171	140036794	161214327	151997123	170050838
P28652	Calcium/calmodulin-dependent protein kinase type II subunit beta OS=Mus musculus OX=10090 GN=Camk2b PE=1 SV=2	30	6601611551	5810653080	6031505772	4430141701	4835904683	4417316584	5348055837	5214278471	5126237371
P28656	Nucleosome assembly protein 1-like 1 OS=Mus musculus OX=10090 GN=Nap1l1 PE=1 SV=2	5	128215269	82393427	5.34803e+07	2.41069e+07	6.16279e+07	21376635	1.00573e+08	5.13557e+07	7.10986e+07
P28658	Ataxin-10 OS=Mus musculus OX=10090 GN=Atxn10 PE=1 SV=2	5	78099427	58497671	4.96705e+07	51478475	4.05991e+07	43066582	4.89004e+07	4.53395e+07	5.11187e+07
P28659	CUGBP Elav-like family member 1 OS=Mus musculus OX=10090 GN=Celf1 PE=1 SV=2	3	6.36167e+07	54723599	19697044	10393547	1.44166e+07	16035825	10527802	1.77968e+07	1.84423e+07
P28660	Nck-associated protein 1 OS=Mus musculus OX=10090 GN=Nckap1 PE=1 SV=2	49	2046461368	1792368384	1580187927	1857303817	2058506366	1795522970	1787787190	1853425166	1912001626
P28663	Beta-soluble NSF attachment protein OS=Mus musculus OX=10090 GN=Napb PE=1 SV=2	16	8.34155e+08	721105350	578641930	769315646	7.85264e+08	6.27902e+08	7.04073e+08	721392471	698975711
P28665	Murinoglobulin-1 OS=Mus musculus OX=10090 GN=Mug1 PE=1 SV=3	2	1.45277e+07	2.4925e+06	8.5321e+06	1.24169e+07	19454385	1.71938e+07	12177599	1.50133e+07	15031820
P28667	MARCKS-related protein OS=Mus musculus OX=10090 GN=Marcksl1 PE=1 SV=2	2	208532684	191364923	1.80337e+08	163513874	1.84205e+08	156338041	1.74114e+08	1.77716e+08	1.74238e+08
P28738	Kinesin heavy chain isoform 5C OS=Mus musculus OX=10090 GN=Kif5c PE=1 SV=3	35	6.74669e+08	583139280	4.38631e+08	5.93652e+08	5.74441e+08	516553654	5.71533e+08	5.51777e+08	5.98056e+08
P28740	Kinesin-like protein KIF2A OS=Mus musculus OX=10090 GN=Kif2a PE=1 SV=2	21	494593762	407470093	2.93169e+08	403369454	369271578	335209674	3.7924e+08	389955851	3.79011e+08
P28741	Kinesin-like protein KIF3A OS=Mus musculus OX=10090 GN=Kif3a PE=1 SV=2	3	4.15108e+07	3.0711e+07	2.29533e+07	3.13886e+07	3.23358e+07	2.03763e+07	27299287	3.82141e+07	26113323
P28867	Protein kinase C delta type OS=Mus musculus OX=10090 GN=Prkcd PE=1 SV=3	8	86679859	8.43221e+07	8.70229e+07	83587051	74506267	82061558	8.9144e+07	92099278	81305146
P29341	Polyadenylate-binding protein 1 OS=Mus musculus OX=10090 GN=Pabpc1 PE=1 SV=2	15	5.55658e+08	468934201	353831420	3.64921e+08	4.25388e+08	3.48857e+08	4.20762e+08	4.01365e+08	400028688
P29387	Guanine nucleotide-binding protein subunit beta-4 OS=Mus musculus OX=10090 GN=Gnb4 PE=1 SV=4	2	76763904	75888849	44844128	66214979	75618606	65706902	60206871	60688109	64863673
P29533	Vascular cell adhesion protein 1 OS=Mus musculus OX=10090 GN=Vcam1 PE=1 SV=1	2	1.33971e+07	13570374	4.92345e+06	7.33586e+06	6610584	9996050	5263066	8632564	6835144
P29595	NEDD8 OS=Mus musculus OX=10090 GN=Nedd8 PE=1 SV=2	1	8082320	19309918	7211464	9163999	7.70356e+06	6673079	15742827	11351033
P29699	Alpha-2-HS-glycoprotein OS=Mus musculus OX=10090 GN=Ahsg PE=1 SV=1	3	7.37145e+07	74291551	2.15371e+07	3.59031e+07	5.27677e+07	23354953	5.71916e+07	4.09613e+07	5.75275e+07
P30416	Peptidyl-prolyl cis-trans isomerase FKBP4 OS=Mus musculus OX=10090 GN=Fkbp4 PE=1 SV=5	11	263114967	2.09688e+08	129513203	1.99411e+08	1.91982e+08	154682869	1.73531e+08	1.80517e+08	1.76221e+08
P30677	Guanine nucleotide-binding protein subunit alpha-14 OS=Mus musculus OX=10090 GN=Gna14 PE=1 SV=2	1	12206962	11128975	8.09145e+06	7.69208e+06	7008637	6714940	9640729	7.70781e+06	10444354
P30875	Somatostatin receptor type 2 OS=Mus musculus OX=10090 GN=Sstr2 PE=2 SV=1	1	1.91716e+06	2.3263e+06	1.38274e+06		2.23439e+06		1.53644e+06	7.1419e+06	6711894
P30999	Catenin delta-1 OS=Mus musculus OX=10090 GN=Ctnnd1 PE=1 SV=2	5	66767877	28760140	27165306	9484805	30782358	2.63408e+07	33331301	3.20517e+07	3.1596e+07
P31230	Aminoacyl tRNA synthase complex-interacting multifunctional protein 1 OS=Mus musculus OX=10090 GN=Aimp1 PE=1 SV=2	4	5.20032e+07	5.81865e+07	2.46224e+07	5.97476e+07	59947845	2.68978e+07	48630255	73261026	51584717
P31324	cAMP-dependent protein kinase type II-beta regulatory subunit OS=Mus musculus OX=10090 GN=Prkar2b PE=1 SV=3	14	1037493195	9.01368e+08	615417319	667397641	6.67976e+08	6.17836e+08	729078036	684472785	6.54098e+08
P31648	Sodium- and chloride-dependent GABA transporter 1 OS=Mus musculus OX=10090 GN=Slc6a1 PE=1 SV=2	4	128071546	9.90598e+07	6.00204e+07	94709133	1.08172e+08	84228468	89325967	92034927	9.06753e+07
P31650	Sodium- and chloride-dependent GABA transporter 3 OS=Mus musculus OX=10090 GN=Slc6a11 PE=1 SV=2	12	1383135165	8.86654e+08	6.74532e+08	1412132797	1277707752	1064238936	1130303027	9.64149e+08	1126586338
P31750	RAC-alpha serine/threonine-protein kinase OS=Mus musculus OX=10090 GN=Akt1 PE=1 SV=2	4	6.03288e+07	6.73974e+07	1.52502e+07	7.32591e+07	8.92419e+07	3.74785e+07	7.08541e+07	64182991	7.07031e+07
P31938	Dual specificity mitogen-activated protein kinase kinase 1 OS=Mus musculus OX=10090 GN=Map2k1 PE=1 SV=2	16	7.69615e+08	5.78954e+08	482024860	5.56824e+08	6.14255e+08	472963336	577262933	5.88439e+08	5.67169e+08
P32037	Solute carrier family 2, facilitated glucose transporter member 3 OS=Mus musculus OX=10090 GN=Slc2a3 PE=1 SV=1	9	3.43205e+08	348913672	2.71409e+08	327069659	377443675	302119637	3.0276e+08	323826241	3.12049e+08
P32233	Developmentally-regulated GTP-binding protein 1 OS=Mus musculus OX=10090 GN=Drg1 PE=1 SV=1	2	1.14704e+07	6237027	1.13962e+07	5.62201e+06	5959188	6.10407e+06	4749785	4.04217e+06	8737570
P32883	GTPase KRas OS=Mus musculus OX=10090 GN=Kras PE=1 SV=1	3	1.56066e+08	1.21603e+08	8.89787e+07	1.32579e+08	141783056	1.16822e+08	1.24631e+08	1.19623e+08	1.22943e+08
P32921	Tryptophan--tRNA ligase, cytoplasmic OS=Mus musculus OX=10090 GN=Wars PE=1 SV=2	12	3.1908e+08	2.57537e+08	236161114	212494826	2.36292e+08	200747749	2.45305e+08	2.29514e+08	242647735
P33173	Kinesin-like protein KIF1A OS=Mus musculus OX=10090 GN=Kif1a PE=1 SV=2	24	368346483	3.11612e+08	2.48259e+08	294238374	3.13408e+08	3.19258e+08	3.24133e+08	3.2273e+08	315544831
P34022	Ran-specific GTPase-activating protein OS=Mus musculus OX=10090 GN=Ranbp1 PE=1 SV=2	6	132566330	104480020	7.28758e+07	8.63465e+07	6.92383e+07	4.29289e+07	86047636	81821928	1.48968e+08
P34152	Focal adhesion kinase 1 OS=Mus musculus OX=10090 GN=Ptk2 PE=1 SV=3	3	24700136	18068701	1.78942e+07	1.14217e+07	5557776	9.2479e+06	1.7985e+07	16330117	9.57701e+06
P34884	Macrophage migration inhibitory factor OS=Mus musculus OX=10090 GN=Mif PE=1 SV=2	2	784872306	765613656	5.76024e+08	714864556	8.07427e+08	582474390	659906208	621047579	680035489
P35123	Ubiquitin carboxyl-terminal hydrolase 4 OS=Mus musculus OX=10090 GN=Usp4 PE=1 SV=3	1	7169425	4.16496e+06	1.56096e+06	3654511	3.53801e+06	2829952	4.10659e+06	2.90986e+06	2.99446e+06
P35235	Tyrosine-protein phosphatase non-receptor type 11 OS=Mus musculus OX=10090 GN=Ptpn11 PE=1 SV=2	15	370917212	3.08867e+08	2.45058e+08	2.39117e+08	264555149	2.18371e+08	272646929	2.89751e+08	258919143
P35278	Ras-related protein Rab-5C OS=Mus musculus OX=10090 GN=Rab5c PE=1 SV=2	9	409576051	365558059	342248516	375952481	3.84374e+08	3.05919e+08	375526300	3.56945e+08	365012121
P35279	Ras-related protein Rab-6A OS=Mus musculus OX=10090 GN=Rab6a PE=1 SV=4	8	121179712	145101650	1.01247e+08	147426482	143601781	131160881	134295042	100956245	118128108
P35282	Ras-related protein Rab-21 OS=Mus musculus OX=10090 GN=Rab21 PE=1 SV=4	4	105097897	75767496	61825786	42046878	7.23848e+07	55871441	80189806	6.00148e+07	63492673
P35283	Ras-related protein Rab-12 OS=Mus musculus OX=10090 GN=Rab12 PE=1 SV=3	3	40250262	30314000	28869635	35106777	3.77076e+07	32351099	33800381	31188939	31743403
P35288	Ras-related protein Rab-23 OS=Mus musculus OX=10090 GN=Rab23 PE=1 SV=2	1	18096150	8.17708e+06	8430160	9094120	9446628		12996486	15629166	15275735
P35293	Ras-related protein Rab-18 OS=Mus musculus OX=10090 GN=Rab18 PE=1 SV=2	3	48944407	41788411	1.89969e+07	28368626	28941810	2.4628e+07	40503553	43196407	41218095
P35436	Glutamate receptor ionotropic, NMDA 2A OS=Mus musculus OX=10090 GN=Grin2a PE=1 SV=2	7	81268088	56504172	2.52778e+07	2.42227e+07	48500765	34682320	2.57832e+07	4.35608e+07	40675296
P35438	Glutamate receptor ionotropic, NMDA 1 OS=Mus musculus OX=10090 GN=Grin1 PE=1 SV=1	11	294511153	2.69281e+08	3.49262e+08	2.86686e+08	2.82108e+08	2.4912e+08	262146282	2.8277e+08	3.07957e+08
P35505	Fumarylacetoacetase OS=Mus musculus OX=10090 GN=Fah PE=1 SV=2	7	1.32034e+08	131498032	1.13022e+08	1.33837e+08	145832840	1.28411e+08	103821618	1.11815e+08	1.20762e+08
P35564	Calnexin OS=Mus musculus OX=10090 GN=Canx PE=1 SV=1	11	466579758	366549670	243007820	2.85967e+08	3.45334e+08	289602034	3.24418e+08	323205819	3.5828e+08
P35585	AP-1 complex subunit mu-1 OS=Mus musculus OX=10090 GN=Ap1m1 PE=1 SV=3	14	325372943	2.98747e+08	2.17431e+08	2.99866e+08	339457014	3.04877e+08	2.79129e+08	2.87654e+08	2.71397e+08
P35700	Peroxiredoxin-1 OS=Mus musculus OX=10090 GN=Prdx1 PE=1 SV=1	17	3755163688	3399056792	2980315987	3485443314	3818997462	3188520463	3535253791	3678151132	3658309827
P35762	CD81 antigen OS=Mus musculus OX=10090 GN=Cd81 PE=1 SV=2	1	8596517	9127902	5.34668e+06	7.88465e+06	15856478		8.1703e+06	9370579	9706054
P35802	Neuronal membrane glycoprotein M6-a OS=Mus musculus OX=10090 GN=Gpm6a PE=1 SV=1	9	2087822876	1908032730	1111598080	1759329208	1994998709	1375275904	1688828569	1745741086	1689470031
P35803	Neuronal membrane glycoprotein M6-b OS=Mus musculus OX=10090 GN=Gpm6b PE=1 SV=2	8	1148119893	998776684	7.77923e+08	970437925	1082806753	9.81416e+08	1000331601	951002107	9.68936e+08
P35922	Synaptic functional regulator FMR1 OS=Mus musculus OX=10090 GN=Fmr1 PE=1 SV=1	2	1.10214e+07	5.01265e+06	7212147	7.70962e+06	4.98682e+06	7.12158e+06	8.06171e+06	5341451	1.02295e+07
P35979	60S ribosomal protein L12 OS=Mus musculus OX=10090 GN=Rpl12 PE=1 SV=2	3	75403562	71168528	69934341	56591399	65020750	65198395	69938292	68995507	75744506
P35980	60S ribosomal protein L18 OS=Mus musculus OX=10090 GN=Rpl18 PE=1 SV=3	2	11678581	12484295	11241440	7.83776e+06	1.03042e+07	9.07201e+06	1.11711e+07	3.435e+06	10505600
P36916	Guanine nucleotide-binding protein-like 1 OS=Mus musculus OX=10090 GN=Gnl1 PE=1 SV=4	4	47449859	1.61964e+07	21907999	17592894	2.48631e+07	1.27801e+07	36170257	20975434	31523940
P36993	Protein phosphatase 1B OS=Mus musculus OX=10090 GN=Ppm1b PE=1 SV=1	1	7735950	7489036	3.94742e+06	5.79855e+06	5454678	2917110	5.34353e+06	5568856	4628776
P37040	NADPH--cytochrome P450 reductase OS=Mus musculus OX=10090 GN=Por PE=1 SV=2	8	1.16404e+08	9.8611e+07	7.69424e+07	88787537	84563369	6.84056e+07	7.06775e+07	1.14823e+08	86677709
P38585	Tubulin--tyrosine ligase OS=Mus musculus OX=10090 GN=Ttl PE=1 SV=2	1	9154602	14844508	11528328	14065430	11126288	12110295		15763286	13408506
P39053	Dynamin-1 OS=Mus musculus OX=10090 GN=Dnm1 PE=1 SV=2	72	9539084653	7530915092	6110156232	6910402968	7217199961	6390840583	7204752851	7076398509	7223830758
P39054	Dynamin-2 OS=Mus musculus OX=10090 GN=Dnm2 PE=1 SV=2	1	5.74758e+06
P39087	Glutamate receptor ionotropic, kainate 2 OS=Mus musculus OX=10090 GN=Grik2 PE=1 SV=4	2	2.54355e+07	2.47807e+07	9.21643e+06	3.1136e+06	5.12991e+06		1.3481e+07	15866283	1.1751e+07
P39447	Tight junction protein ZO-1 OS=Mus musculus OX=10090 GN=Tjp1 PE=1 SV=2	31	1382909433	938156989	5.30419e+08	5.40448e+07	33245264	2.07145e+06	3.85641e+08	4.26022e+08	4.08325e+08
P39688	Tyrosine-protein kinase Fyn OS=Mus musculus OX=10090 GN=Fyn PE=1 SV=4	5	40142837	3.57725e+07	23154902	3.79884e+07	32167633	3.02669e+07	2.97624e+07	3.52797e+07	3.13547e+07
P40124	Adenylyl cyclase-associated protein 1 OS=Mus musculus OX=10090 GN=Cap1 PE=1 SV=4	13	751415495	7.00573e+08	543578969	676469379	748845397	5.85752e+08	6.27639e+08	6.55159e+08	6.65847e+08
P40336	Vacuolar protein sorting-associated protein 26A OS=Mus musculus OX=10090 GN=Vps26a PE=1 SV=1	6	9.3497e+07	8.26008e+07	5.98458e+07	9.15133e+07	108206748	87668638	9.21263e+07	68144553	8.92224e+07
P41241	Tyrosine-protein kinase CSK OS=Mus musculus OX=10090 GN=Csk PE=1 SV=2	2	13949122	10763074	8.86089e+06	9.98157e+06	8664252	9.54865e+06	9.40778e+06	9770035	7.72887e+06
P42208	Septin-2 OS=Mus musculus OX=10090 GN=Sept2 PE=1 SV=2	8	1.55162e+08	1.3146e+08	8.94376e+07	107096717	1.26514e+08	89089524	1.18361e+08	1.0359e+08	1.16356e+08
P42227	Signal transducer and activator of transcription 3 OS=Mus musculus OX=10090 GN=Stat3 PE=1 SV=2	3	1.99701e+07	1.91627e+07	1.26263e+07	1.81344e+07	14406888	1.54376e+07	1.59424e+07	14623836	17757620
P42669	Transcriptional activator protein Pur-alpha OS=Mus musculus OX=10090 GN=Pura PE=1 SV=1	13	6.6139e+08	5.59553e+08	4.68627e+08	5.37032e+08	583102500	4.31182e+08	5.13231e+08	5.31004e+08	5.31733e+08
P42859	Huntingtin OS=Mus musculus OX=10090 GN=Htt PE=1 SV=2	11	8.17973e+07	7.3517e+07	5.65526e+07	8.35857e+07	71359741	68731716	6.98837e+07	6.48489e+07	65587936
P42932	T-complex protein 1 subunit theta OS=Mus musculus OX=10090 GN=Cct8 PE=1 SV=3	35	2363128182	2114616732	1894050279	1066901178	1675255452	1328744216	1695899235	1835516046	1829488439
P43006	Excitatory amino acid transporter 2 OS=Mus musculus OX=10090 GN=Slc1a2 PE=1 SV=1	18	3113149549	9.79363e+08	7.95272e+08	1983974300	1185700366	1205070049	1492775457	1464867571	1447326680
P43406	Integrin alpha-V OS=Mus musculus OX=10090 GN=Itgav PE=1 SV=2	4	3.00389e+07	7.40423e+06	17764440	1.51239e+07	3.18407e+07	25072864	25549059	1.74999e+07	2.51853e+07
P45376	Aldose reductase OS=Mus musculus OX=10090 GN=Akr1b1 PE=1 SV=3	10	617793399	537677005	440727482	492152379	427636949	468556930	5.03407e+08	492493663	519900442
P45377	Aldose reductase-related protein 2 OS=Mus musculus OX=10090 GN=Akr1b8 PE=1 SV=2	3	53574899	33004289	4.06316e+07	51546330	26251322	4.87527e+07	49290445	47923613	57309695
P45591	Cofilin-2 OS=Mus musculus OX=10090 GN=Cfl2 PE=1 SV=1	5	115756454	87641128	5.89693e+07	8.12999e+07	7.92857e+07	7.61142e+07	6.16888e+07	79070472	8.3372e+07
P45878	Peptidyl-prolyl cis-trans isomerase FKBP2 OS=Mus musculus OX=10090 GN=Fkbp2 PE=1 SV=1	3	133840683	112266323	106221373	113712757	107670257	96706596	113900023	110612949	109034148
P46096	Synaptotagmin-1 OS=Mus musculus OX=10090 GN=Syt1 PE=1 SV=1	26	2192220040	1758349799	1361492531	1578630786	1675460786	1364171156	1527540585	1551024879	1640440766
P46097	Synaptotagmin-2 OS=Mus musculus OX=10090 GN=Syt2 PE=1 SV=1	5	1.20979e+08	84314220	36465044	116287404	55768347	91147264	82023602	9.03043e+07	77333836
P46460	Vesicle-fusing ATPase OS=Mus musculus OX=10090 GN=Nsf PE=1 SV=2	61	7934624079	6235943010	5824203475	6127036956	6027672578	5899160053	6080152934	6136069660	6191914867
P46471	26S proteasome regulatory subunit 7 OS=Mus musculus OX=10090 GN=Psmc2 PE=1 SV=5	14	398256693	2.81771e+08	2.46618e+08	1.08911e+08	1.41221e+08	118210148	1.93879e+08	1.8992e+08	1.69381e+08
P46638	Ras-related protein Rab-11B OS=Mus musculus OX=10090 GN=Rab11b PE=1 SV=3	3	62968204	50091691	61083136	3.60854e+07	4.26061e+07	3.58393e+07	42142281	56217298	52074891
P46660	Alpha-internexin OS=Mus musculus OX=10090 GN=Ina PE=1 SV=3	24	9.59237e+08	867020448	6.31504e+08	6.809e+08	8.32288e+08	6.16963e+08	7.34868e+08	741067549	7.64262e+08
P46664	Adenylosuccinate synthetase isozyme 2 OS=Mus musculus OX=10090 GN=Adss PE=1 SV=2	8	1.48683e+08	1.0453e+08	131329921	1.35698e+08	1.11675e+08	9.20895e+07	150725817	1.41652e+08	156929346
P46735	Unconventional myosin-Ib OS=Mus musculus OX=10090 GN=Myo1b PE=1 SV=3	3	109265368	131087292	156201793	151420941	149246408	181843474	150450870	147203311	136866981
P46737	Lys-63-specific deubiquitinase BRCC36 OS=Mus musculus OX=10090 GN=Brcc3 PE=1 SV=1	1	7721766	7620031	2193157	4.66128e+06	6309398	4.7001e+06	5303565	6.85714e+06	3.73377e+06
P46935	E3 ubiquitin-protein ligase NEDD4 OS=Mus musculus OX=10090 GN=Nedd4 PE=1 SV=3	11	1.17762e+08	83554324	5.8141e+07	6.13409e+07	106710804	7.4909e+07	6.28099e+07	7.68761e+07	76922015
P46978	Dolichyl-diphosphooligosaccharide--protein glycosyltransferase subunit STT3A OS=Mus musculus OX=10090 GN=Stt3a PE=1 SV=1	3	28560936	2.7196e+07	8706696	24851369	2.82295e+07	19646912	3.05792e+07	33717933	24752552
P47708	Rabphilin-3A OS=Mus musculus OX=10090 GN=Rph3a PE=1 SV=2	23	4.71517e+08	4.40952e+08	329339552	3.70154e+08	4.0215e+08	3.12128e+08	3.73717e+08	3.67545e+08	3.07169e+08
P47738	Aldehyde dehydrogenase, mitochondrial OS=Mus musculus OX=10090 GN=Aldh2 PE=1 SV=1	21	6764105797	4493636702	2614711747	6.45129e+08	6.02826e+08	454160091	2421406659	2314168686	2328862095
P47746	Cannabinoid receptor 1 OS=Mus musculus OX=10090 GN=Cnr1 PE=1 SV=1	2	19233414	1.54199e+07	8.20177e+06	1.54339e+07	1.51041e+07	1.41217e+07	11905426	1.29684e+07	15789534
P47753	F-actin-capping protein subunit alpha-1 OS=Mus musculus OX=10090 GN=Capza1 PE=1 SV=4	3	53487157	43936041	19216196	42193557	33507508	37057880	27450277	52432658	4.12685e+07
P47754	F-actin-capping protein subunit alpha-2 OS=Mus musculus OX=10090 GN=Capza2 PE=1 SV=3	10	820106781	7.10622e+08	6.17095e+08	603404696	6.09158e+08	5.8607e+08	587478000	648801992	6.50538e+08
P47757	F-actin-capping protein subunit beta OS=Mus musculus OX=10090 GN=Capzb PE=1 SV=3	12	1343204381	1288932883	1122184594	1119265732	1100057358	1022197028	1085563181	1109553519	1106956479
P47802	Metaxin-1 OS=Mus musculus OX=10090 GN=Mtx1 PE=1 SV=1	1	4652935	2354884	2.55153e+06			2103231	1.94756e+06	1.59688e+06	1.90425e+06
P47809	Dual specificity mitogen-activated protein kinase kinase 4 OS=Mus musculus OX=10090 GN=Map2k4 PE=1 SV=2	7	212442806	180396697	149682244	184799123	1.57312e+08	123423531	165737633	1.63262e+08	1.61527e+08
P47856	Glutamine--fructose-6-phosphate aminotransferase [isomerizing] 1 OS=Mus musculus OX=10090 GN=Gfpt1 PE=1 SV=3	1					31865530				4.03633e+06
P47857	ATP-dependent 6-phosphofructokinase, muscle type OS=Mus musculus OX=10090 GN=Pfkm PE=1 SV=3	34	2885092613	2615497020	2101864403	2461119711	2752385874	2461514332	2408462460	2453878252	2500684437
P47911	60S ribosomal protein L6 OS=Mus musculus OX=10090 GN=Rpl6 PE=1 SV=3	3	3.66723e+07	1.41394e+07	9550445	1.35909e+07	28856637	1.25311e+07	2.20631e+07	17808578	19784016
P47915	60S ribosomal protein L29 OS=Mus musculus OX=10090 GN=Rpl29 PE=1 SV=2	2	29561183	20479492	6.81558e+06	15529470	9237781	2.24602e+06	1.96999e+07	16457369	1.85163e+07
P47941	Crk-like protein OS=Mus musculus OX=10090 GN=Crkl PE=1 SV=2	7	195033214	1.77237e+08	9.878e+07	41726903	42400789	3.00862e+07	81141551	8.85481e+07	82859873
P47955	60S acidic ribosomal protein P1 OS=Mus musculus OX=10090 GN=Rplp1 PE=1 SV=1	1		61187452	23961412	75693464	74547760	49200104	44787064	61002692	60900548
P47962	60S ribosomal protein L5 OS=Mus musculus OX=10090 GN=Rpl5 PE=1 SV=3	3	47776918	33479803	1.92197e+07	2.99863e+07	4.48983e+07	27968032	2.69358e+07	3.18585e+07	3.4439e+07
P48036	Annexin A5 OS=Mus musculus OX=10090 GN=Anxa5 PE=1 SV=1	5	47748577	45463889	2.75304e+07	4.18441e+07	52636127	23807700	4.47325e+07	39353410	3.84769e+07
P48193	Protein 4.1 OS=Mus musculus OX=10090 GN=Epb41 PE=1 SV=2	1	3.92378e+07	32286680	18583430	2.99652e+07	2.63838e+07	26932760	31746927	2.92232e+07	27861162
P48318	Glutamate decarboxylase 1 OS=Mus musculus OX=10090 GN=Gad1 PE=1 SV=2	6	174090959	107075645	129279141	1.06021e+08	1.49374e+08	115284799	128953747	124531281	134760895
P48320	Glutamate decarboxylase 2 OS=Mus musculus OX=10090 GN=Gad2 PE=1 SV=1	6	318433574	2.37825e+08	211818266	206337984	156166478	213391972	2.1629e+08	2.21436e+08	2.32027e+08
P48453	Serine/threonine-protein phosphatase 2B catalytic subunit beta isoform OS=Mus musculus OX=10090 GN=Ppp3cb PE=1 SV=2	11	4.0071e+08	3.05397e+08	2.60947e+08	244258175	2.66177e+08	2.30847e+08	256038436	2.52522e+08	270806216
P48678	Prelamin-A/C OS=Mus musculus OX=10090 GN=Lmna PE=1 SV=2	2	1.6205e+07	1.47985e+07	9.68268e+06	1.2465e+07	11703600	13439430	7772303	1.36056e+07	1.03751e+07
P48722	Heat shock 70 kDa protein 4L OS=Mus musculus OX=10090 GN=Hspa4l PE=1 SV=2	35	1062158363	835986980	7.08259e+08	8.78192e+08	951684093	795489361	865792199	9.08893e+08	8.8806e+08
P48758	Carbonyl reductase [NADPH] 1 OS=Mus musculus OX=10090 GN=Cbr1 PE=1 SV=3	12	4.33691e+08	314744321	240755787	2.26311e+08	2.34889e+08	1.8904e+08	2.44883e+08	250314981	278979780
P48774	Glutathione S-transferase Mu 5 OS=Mus musculus OX=10090 GN=Gstm5 PE=1 SV=1	8	1171628550	1018724426	321309814	6.91792e+08	810621651	990618577	600374548	509601416	489438858
P49025	Citron Rho-interacting kinase OS=Mus musculus OX=10090 GN=Cit PE=1 SV=3	6	1.71146e+07	2.29486e+07	25483476	2.72793e+07	3.21123e+07	3.64232e+07	2.26787e+07	1.71046e+07	2.80424e+07
P49312	Heterogeneous nuclear ribonucleoprotein A1 OS=Mus musculus OX=10090 GN=Hnrnpa1 PE=1 SV=2	10	4.34956e+08	3.55568e+08	333793988	3.11158e+08	323821564	323226396	351391434	3.63708e+08	339010815
P49442	Inositol polyphosphate 1-phosphatase OS=Mus musculus OX=10090 GN=Inpp1 PE=1 SV=2	8	2.33337e+08	236654631	1.34908e+08	2.26874e+08	2.61867e+08	187299269	1.79998e+08	183257535	182475609
P49443	Protein phosphatase 1A OS=Mus musculus OX=10090 GN=Ppm1a PE=1 SV=1	11	988225967	882172804	437992720	6.12618e+08	6.70326e+08	536333991	6.71378e+08	6.82428e+08	707079644
P49615	Cyclin-dependent-like kinase 5 OS=Mus musculus OX=10090 GN=Cdk5 PE=1 SV=1	11	652834456	494707930	478118549	504795579	526006513	465823281	5.06311e+08	5.18603e+08	466377638
P49722	Proteasome subunit alpha type-2 OS=Mus musculus OX=10090 GN=Psma2 PE=1 SV=3	10	2.72898e+08	2.15966e+08	207630385	1.9132e+08	192383049	171304328	239905284	201079179	207984679
P50114	Protein S100-B OS=Mus musculus OX=10090 GN=S100b PE=1 SV=2	1	29642792			34107364		8.95267e+06		32778276	10030143
P50136	2-oxoisovalerate dehydrogenase subunit alpha, mitochondrial OS=Mus musculus OX=10090 GN=Bckdha PE=1 SV=1	6	7.64871e+07	5.70922e+07	2.98681e+08	3.69222e+07	31400212	3.39748e+07	3.78141e+08	3.03797e+08	3.28421e+08
P50247	Adenosylhomocysteinase OS=Mus musculus OX=10090 GN=Ahcy PE=1 SV=3	11	5.31633e+08	462602903	3.90624e+08	4.91252e+08	5.15448e+08	480912445	4.62017e+08	438887390	4.7852e+08
P50396	Rab GDP dissociation inhibitor alpha OS=Mus musculus OX=10090 GN=Gdi1 PE=1 SV=3	49	9172103465	8247865462	6862537561	7967638513	8627042598	7357203457	7661775703	7749222075	7679629729
P50429	Arylsulfatase B OS=Mus musculus OX=10090 GN=Arsb PE=1 SV=3	4	6.47432e+07	6.38145e+07	4.45632e+07	5.51672e+07	6.58158e+07	4.76646e+07	58062194	61727854	59133647
P50516	V-type proton ATPase catalytic subunit A OS=Mus musculus OX=10090 GN=Atp6v1a PE=1 SV=2	35	4494160470	3424144153	3130900841	2771109144	2939752867	2352288708	3084013187	2906136751	3007471710
P50518	V-type proton ATPase subunit E 1 OS=Mus musculus OX=10090 GN=Atp6v1e1 PE=1 SV=2	7	2.68001e+08	251757504	241264950	261235764	289730437	205045741	233091474	238985372	264258758
P50580	Proliferation-associated protein 2G4 OS=Mus musculus OX=10090 GN=Pa2g4 PE=1 SV=3	5	132108364	105215099	7.53373e+07	111129757	114573006	93111504	108481453	104337722	95648847
P51141	Segment polarity protein dishevelled homolog DVL-1 OS=Mus musculus OX=10090 GN=Dvl1 PE=1 SV=2	12	287030721	203745172	1.65236e+08	6.38988e+07	23460645	3.05681e+07	1.24053e+08	1.25232e+08	1.23474e+08
P51150	Ras-related protein Rab-7a OS=Mus musculus OX=10090 GN=Rab7a PE=1 SV=2	13	724334838	692110029	539625302	6.19111e+08	6.31476e+08	533762426	576591131	612476472	608596754
P51174	Long-chain specific acyl-CoA dehydrogenase, mitochondrial OS=Mus musculus OX=10090 GN=Acadl PE=1 SV=2	12	614204998	940951506	3.49197e+08	945634264	1183795894	671107919	7.98323e+08	793538608	7.92588e+08
P51791	H(+)/Cl(-) exchange transporter 3 OS=Mus musculus OX=10090 GN=Clcn3 PE=1 SV=2	2	27041438	2.24931e+07	23910106	17510932	17949658	1.55447e+07	16904427	1.8374e+07	19444888
P51807	Dynein light chain Tctex-type 1 OS=Mus musculus OX=10090 GN=Dynlt1 PE=1 SV=1	1	4797231	4.53144e+06	1775474	3.96514e+06	4.03116e+06	5723037	3395287	6.15293e+06	6695880
P51830	Adenylate cyclase type 9 OS=Mus musculus OX=10090 GN=Adcy9 PE=1 SV=1	6	4.70499e+07	4.37798e+07	2.66558e+07	4.16201e+07	4.87854e+07	37816633	4.26578e+07	3.60508e+07	4.13237e+07
P51855	Glutathione synthetase OS=Mus musculus OX=10090 GN=Gss PE=1 SV=1	2	15274951	1.51689e+07	2.53889e+06	9360202	8.65199e+06	10517492	7243455	1.16288e+07	13278938
P51859	Hepatoma-derived growth factor OS=Mus musculus OX=10090 GN=Hdgf PE=1 SV=2	3	4.63567e+07	4.13426e+07	30446952	3.29653e+07	3.76409e+07	25419554	28044342	35271053	35624057
P51863	V-type proton ATPase subunit d 1 OS=Mus musculus OX=10090 GN=Atp6v0d1 PE=1 SV=2	1	15845438	13890875	16678016	18107306	12245306	11568140	11461174	12081679	17538582
P51880	Fatty acid-binding protein, brain OS=Mus musculus OX=10090 GN=Fabp7 PE=1 SV=2	9	3648540018	3594290894	2670416923	3277235372	3555255396	2836405741	3114870647	3141237382	3204743077
P52479	Ubiquitin carboxyl-terminal hydrolase 10 OS=Mus musculus OX=10090 GN=Usp10 PE=1 SV=3	1	8.12967e+06	7.6629e+06	1.96757e+06	8.17467e+06	6.69441e+06	6.18961e+06	4.32481e+06	4554509	5037091
P52480	Pyruvate kinase PKM OS=Mus musculus OX=10090 GN=Pkm PE=1 SV=4	51	13842651679	11442244528	9533154669	11913130736	12346576472	10774403457	11269539155	11310862278	11381855083
P52912	Nucleolysin TIA-1 OS=Mus musculus OX=10090 GN=Tia1 PE=1 SV=1	1	4.01024e+06	6.74165e+06	3.83327e+06	4539617		4334349	6003681	4.36221e+06	5948968
P53026	60S ribosomal protein L10a OS=Mus musculus OX=10090 GN=Rpl10a PE=1 SV=3	4	42170237	2.81666e+07	2.94427e+07	2.70218e+07	4.08395e+07	2.93999e+07	31073612	33144659	2.90419e+07
P53612	Geranylgeranyl transferase type-2 subunit beta OS=Mus musculus OX=10090 GN=Rabggtb PE=1 SV=2	3	39008575	2.5422e+07	14379819	1.83075e+07	1.51604e+07	2.42539e+07	1.81864e+07	2.31238e+07	2.08816e+07
P53810	Phosphatidylinositol transfer protein alpha isoform OS=Mus musculus OX=10090 GN=Pitpna PE=1 SV=2	19	9.58055e+08	770825468	526590958	746673415	7.7659e+08	6.56914e+08	7.04138e+08	6.89132e+08	7.27384e+08
P53811	Phosphatidylinositol transfer protein beta isoform OS=Mus musculus OX=10090 GN=Pitpnb PE=1 SV=2	4	70066093	5.99613e+07	2.54709e+07	4.6658e+07	52634689	3.12984e+07	38459515	52902827	2.97237e+07
P53994	Ras-related protein Rab-2A OS=Mus musculus OX=10090 GN=Rab2a PE=1 SV=1	14	8.30902e+08	751405231	6.30735e+08	678485696	7.57621e+08	6.41888e+08	6.96707e+08	6.79658e+08	703735863
P54227	Stathmin OS=Mus musculus OX=10090 GN=Stmn1 PE=1 SV=2	15	1259214649	1209745968	6.99602e+08	4.19002e+07	3.94187e+07	1.79937e+07	4.48929e+08	4.49902e+08	4.42779e+08
P54731	FAS-associated factor 1 OS=Mus musculus OX=10090 GN=Faf1 PE=1 SV=2	1	9738239	7.47927e+06	6170208	13856941	13828410	10791666	7457416	8.02005e+06
P54754	Ephrin type-B receptor 3 OS=Mus musculus OX=10090 GN=Ephb3 PE=1 SV=2	1	6.06222e+06		5.39856e+06	4679591	3.93389e+06	4149479	4.8836e+06	4534779
P54763	Ephrin type-B receptor 2 OS=Mus musculus OX=10090 GN=Ephb2 PE=1 SV=3	7	6.00912e+07	4.64858e+07	43681302	49356261	45916383	4.89988e+07	5.01642e+07	4.98355e+07	61143986
P54775	26S proteasome regulatory subunit 6B OS=Mus musculus OX=10090 GN=Psmc4 PE=1 SV=2	5	71859831	59644230	54265659	3.0152e+07	3.63813e+07	39902445	5.83075e+07	4.81461e+07	50996708
P54822	Adenylosuccinate lyase OS=Mus musculus OX=10090 GN=Adsl PE=1 SV=2	4	3.05447e+07	2.84413e+07	2.11247e+07	2.29559e+07	1.42749e+07	1.39659e+07	18365123	22291670	2.05252e+07
P54823	Probable ATP-dependent RNA helicase DDX6 OS=Mus musculus OX=10090 GN=Ddx6 PE=1 SV=1	9	213919967	2.08919e+08	1.35696e+08	1.7757e+08	186531143	1.66516e+08	1.78986e+08	171942824	1.88798e+08
P54830	Tyrosine-protein phosphatase non-receptor type 5 OS=Mus musculus OX=10090 GN=Ptpn5 PE=1 SV=2	3	1.69344e+07	14722168	14959956	21121900	15360490	12523771	14850389	19205856	1.67665e+07
P54923	[Protein ADP-ribosylarginine] hydrolase OS=Mus musculus OX=10090 GN=Adprh PE=1 SV=1	10	169150171	150683659	138204582	8.80545e+07	7.80047e+07	74516444	91729383	103636982	1.08938e+08
P55012	Solute carrier family 12 member 2 OS=Mus musculus OX=10090 GN=Slc12a2 PE=1 SV=2	7	94994389	7.23895e+07	4.96314e+07	80519461	7.02884e+07	6.50269e+07	7.28345e+07	5.79196e+07	59474169
P55066	Neurocan core protein OS=Mus musculus OX=10090 GN=Ncan PE=1 SV=1	11	3.68803e+08	302683348	3.75611e+08	3.04512e+08	3.58991e+08	3.5285e+08	3.28928e+08	3.07731e+08	3.02399e+08
P55258	Ras-related protein Rab-8A OS=Mus musculus OX=10090 GN=Rab8a PE=1 SV=2	2	2.55403e+07	1.93326e+07	23518201	1.98165e+07	1.98147e+07	17774723	2.32766e+07	21846210	1.84502e+07
P55264	Adenosine kinase OS=Mus musculus OX=10090 GN=Adk PE=1 SV=2	3	125041352	102937333	8.5977e+07	9.42267e+07	7.97762e+07	9.45684e+07	101594543	125421870	1.2087e+08
P56371	Ras-related protein Rab-4A OS=Mus musculus OX=10090 GN=Rab4a PE=1 SV=2	4	547643248	409226264	301502382	394141984	3.82202e+08	341605884	384946241	399396924	402075069
P56376	Acylphosphatase-1 OS=Mus musculus OX=10090 GN=Acyp1 PE=1 SV=2	1	6075190	2.92507e+06					2.70409e+06
P56395	Cytochrome b5 OS=Mus musculus OX=10090 GN=Cyb5a PE=1 SV=2	1	3508381		5009884
P56399	Ubiquitin carboxyl-terminal hydrolase 5 OS=Mus musculus OX=10090 GN=Usp5 PE=1 SV=1	30	1153451822	9.9217e+08	8.1398e+08	962423685	1006441229	8.87255e+08	9.64493e+08	9.5023e+08	975217152
P56546	C-terminal-binding protein 2 OS=Mus musculus OX=10090 GN=Ctbp2 PE=1 SV=2	1	14779376	11141510	9587783	10499803	12495531	8776776	10979687	12107749	12462413
P56564	Excitatory amino acid transporter 1 OS=Mus musculus OX=10090 GN=Slc1a3 PE=1 SV=2	9	1577342692	1268470486	873882303	1384329214	1372161223	1149620382	1244451454	1210700426	1262379494
P56695	Wolframin OS=Mus musculus OX=10090 GN=Wfs1 PE=1 SV=1	5	4.01806e+07	23365771	3.24007e+07	4.62685e+07	3.96592e+07	2.32584e+07	3.19545e+07	3.63252e+07	4.19979e+07
P56959	RNA-binding protein FUS OS=Mus musculus OX=10090 GN=Fus PE=1 SV=1	2	3.0411e+07	1.86351e+07	1.63751e+07	13888684	1.14369e+07	1.90275e+07	10684625	1.06063e+07	16885558
P57722	Poly(rC)-binding protein 3 OS=Mus musculus OX=10090 GN=Pcbp3 PE=1 SV=3	3	95925215	85423967	58546507	85223476	81761134	74708463	76598165	68466309	79539591
P57724	Poly(rC)-binding protein 4 OS=Mus musculus OX=10090 GN=Pcbp4 PE=1 SV=1	1	4.1285e+06	5.1901e+06	5.0065e+06	4.0986e+06	5569154	3.94536e+06	5.73871e+06	5.48372e+06	5486618
P57759	Endoplasmic reticulum resident protein 29 OS=Mus musculus OX=10090 GN=Erp29 PE=1 SV=2	2	1.88952e+07	4.91857e+06	6.21282e+06				3.71933e+06	12733639	12689592
P57776	Elongation factor 1-delta OS=Mus musculus OX=10090 GN=Eef1d PE=1 SV=3	8	1.38035e+08	1.35678e+08	1.16933e+08	71867399	8.58621e+07	44353580	1.01078e+08	9.59878e+07	9.44082e+07
P57780	Alpha-actinin-4 OS=Mus musculus OX=10090 GN=Actn4 PE=1 SV=1	11	1.03189e+08	9.83706e+07	47348919	6.77746e+07	6.19206e+07	54039472	7.50962e+07	7.11857e+07	76662937
P58021	Transmembrane 9 superfamily member 2 OS=Mus musculus OX=10090 GN=Tm9sf2 PE=1 SV=1	1	11445955	11702794	4.18604e+06	10473315	4.67225e+06	10317914	10065301	13135804	7.35399e+06
P58044	Isopentenyl-diphosphate Delta-isomerase 1 OS=Mus musculus OX=10090 GN=Idi1 PE=1 SV=1	3	5.78235e+07	52099582	2.85268e+07	61307346	5.7212e+07	4.36194e+07	4.48355e+07	4.28063e+07	42887617
P58252	Elongation factor 2 OS=Mus musculus OX=10090 GN=Eef2 PE=1 SV=2	44	3710036922	2840423200	2712884761	2890890027	2920137480	2552129445	2843795029	2869551696	2890513689
P58281	Dynamin-like 120 kDa protein, mitochondrial OS=Mus musculus OX=10090 GN=Opa1 PE=1 SV=1	23	5.14446e+08	4.33159e+08	340556642	3.45531e+08	3.67799e+08	3.17268e+08	3.74959e+08	3.94388e+08	3.85009e+08
P58389	Serine/threonine-protein phosphatase 2A activator OS=Mus musculus OX=10090 GN=Ptpa PE=1 SV=1	7	145424221	1.2636e+08	116412848	1.19173e+08	1.28062e+08	9.61111e+07	1.03065e+08	1.04665e+08	1.26431e+08
P58404	Striatin-4 OS=Mus musculus OX=10090 GN=Strn4 PE=1 SV=2	13	2.1304e+08	1.77061e+08	1.01102e+08	62891284	5.97581e+07	5.35892e+07	8.8042e+07	8.11655e+07	1.18939e+08
P58871	182 kDa tankyrase-1-binding protein OS=Mus musculus OX=10090 GN=Tnks1bp1 PE=1 SV=2	14	1.54506e+08	1.02303e+08	5.7168e+07	4.03451e+07	4.38857e+07	3.65043e+07	59148690	6.4763e+07	6.31425e+07
P59016	Vacuolar protein sorting-associated protein 33B OS=Mus musculus OX=10090 GN=Vps33b PE=1 SV=1	2	1.75746e+07	1.48499e+07	1.16389e+07	1.04139e+07	3.48933e+06	13172451	1.04587e+07	3.22696e+06	1.34326e+07
P59108	Copine-2 OS=Mus musculus OX=10090 GN=Cpne2 PE=1 SV=1	1	13521879	6.45775e+06	4993974	19567634	23837810	8942730	14019003	13726011	13897099
P59279	Ras-related protein Rab-2B OS=Mus musculus OX=10090 GN=Rab2b PE=1 SV=1	2	88224106	57183324	4.03149e+07	68372813	54525136	34979056	51278137	34078210	48226493
P59281	Rho GTPase-activating protein 39 OS=Mus musculus OX=10090 GN=Arhgap39 PE=1 SV=2	6	7.44401e+07	58150329	36448099	34369410	3.02794e+07	1.86342e+07	4.23999e+07	48695833	4.29606e+07
P59325	Eukaryotic translation initiation factor 5 OS=Mus musculus OX=10090 GN=Eif5 PE=1 SV=1	5	130346656	109318764	69524597	28138837	22540724	1.60178e+07	67565986	5.52489e+07	46772271
P59326	YTH domain-containing family protein 1 OS=Mus musculus OX=10090 GN=Ythdf1 PE=1 SV=1	1	1.1618e+07	13014883	6.99397e+06	8804305	1.02328e+07	6.81705e+06	8.67689e+06	1.04085e+07	9.88033e+06
P59481	VIP36-like protein OS=Mus musculus OX=10090 GN=Lman2l PE=1 SV=1	1	6.3454e+06	7.36414e+06	5.71701e+06	5955137	5.82291e+06	4.694e+06	4.5508e+06	5.90448e+06	4.48424e+06
P59759	MKL/myocardin-like protein 2 OS=Mus musculus OX=10090 GN=Mkl2 PE=1 SV=1	4	72059779	5.54669e+07	2.93885e+07	1.04764e+07	5.71599e+06	1.89061e+06	30676617	2.68801e+07	2.90863e+07
P59999	Actin-related protein 2/3 complex subunit 4 OS=Mus musculus OX=10090 GN=Arpc4 PE=1 SV=3	8	455951592	464929269	374270241	430983593	452269806	385326515	4.28325e+08	383912278	4.07781e+08
P60122	RuvB-like 1 OS=Mus musculus OX=10090 GN=Ruvbl1 PE=1 SV=1	9	196586821	154798810	1.48062e+08	2.34035e+07	7.08822e+07	36096274	9.31216e+07	109261583	9.50104e+07
P60202	Myelin proteolipid protein OS=Mus musculus OX=10090 GN=Plp1 PE=1 SV=2	11	16100135476	11430423736	9403935878	14928121078	14605891688	12746603946	13121659450	13181806587	13116538728
P60229	Eukaryotic translation initiation factor 3 subunit E OS=Mus musculus OX=10090 GN=Eif3e PE=1 SV=1	7	63474736	5.95709e+07	50372362	49991595	5.20804e+07	3.28818e+07	4.80348e+07	5.80903e+07	4.66029e+07
P60335	Poly(rC)-binding protein 1 OS=Mus musculus OX=10090 GN=Pcbp1 PE=1 SV=1	12	1252490035	1097671743	859926170	9.27507e+08	9.26913e+08	8.16328e+08	9.54346e+08	934629062	9.13392e+08
P60469	Liprin-alpha-3 OS=Mus musculus OX=10090 GN=Ppfia3 PE=1 SV=2	22	264973338	211958401	1.46365e+08	1.65381e+08	2.13822e+08	1.90803e+08	213999187	2.04785e+08	1.75165e+08
P60487	Pyridoxal phosphate phosphatase OS=Mus musculus OX=10090 GN=Pdxp PE=1 SV=1	6	195918758	135311675	126496001	134471301	117780363	127318447	147939077	138870072	150623460
P60521	Gamma-aminobutyric acid receptor-associated protein-like 2 OS=Mus musculus OX=10090 GN=Gabarapl2 PE=1 SV=1	4	5.0455e+07	51925289	39299712	5.19089e+07	61536293	40908633	5.04506e+07	57563360	52124528
P60670	Nuclear protein localization protein 4 homolog OS=Mus musculus OX=10090 GN=Nploc4 PE=1 SV=3	2	211041296	159961387	205138590	1.17988e+08	106543833	1.47465e+08	159912169	139119096	155844705
P60710	Actin, cytoplasmic 1 OS=Mus musculus OX=10090 GN=Actb PE=1 SV=1	50	65775852860	57889840883	50627345821	52027845933	52445215966	44270554131	53133827034	55172586462	52927441802
P60761	Neurogranin OS=Mus musculus OX=10090 GN=Nrgn PE=1 SV=1	1	2.70287e+07	2.61936e+07	2.11521e+07	2.05718e+07	1.66077e+07	2.2297e+07	2.30784e+07	1.81077e+07	1.82984e+07
P60764	Ras-related C3 botulinum toxin substrate 3 OS=Mus musculus OX=10090 GN=Rac3 PE=1 SV=1	2	95736569	106701624	124599051	102874636	1.21242e+08	96609396	1.13617e+08	108986418	97839198
P60766	Cell division control protein 42 homolog OS=Mus musculus OX=10090 GN=Cdc42 PE=1 SV=2	9	1026560523	993733389	819211028	964793464	1041147966	8.09355e+08	8.95021e+08	8.77839e+08	9.02548e+08
P60840	Alpha-endosulfine OS=Mus musculus OX=10090 GN=Ensa PE=1 SV=1	1	23840266	23391378	10731204				10445800	10302005	10905574
P60843	Eukaryotic initiation factor 4A-I OS=Mus musculus OX=10090 GN=Eif4a1 PE=1 SV=1	23	1637414846	1461407540	1311479245	1359111466	1485573181	1229624043	1327834830	1358126999	1363978299
P60867	40S ribosomal protein S20 OS=Mus musculus OX=10090 GN=Rps20 PE=1 SV=1	3	112584923	94184596	5.18613e+07	68906876	89605845	78029519	108747532	86497358	85950522
P60879	Synaptosomal-associated protein 25 OS=Mus musculus OX=10090 GN=Snap25 PE=1 SV=1	23	1010379262	1167395095	6.9599e+08	8.81935e+08	1031411875	6.36978e+08	8.62563e+08	8.59588e+08	8.93392e+08
P60904	DnaJ homolog subfamily C member 5 OS=Mus musculus OX=10090 GN=Dnajc5 PE=1 SV=1	2	41811009	42757543	1.23929e+07	40564846	4.57455e+07	24881351	30767702	29277464	32255566
P61021	Ras-related protein Rab-5B OS=Mus musculus OX=10090 GN=Rab5b PE=1 SV=1	3	111661504	108255362	83436142	110294494	132096528	92322448	102352378	95363072	107828064
P61027	Ras-related protein Rab-10 OS=Mus musculus OX=10090 GN=Rab10 PE=1 SV=1	9	998565083	1013608923	772460508	962109745	1087568335	806140942	876132704	9.11998e+08	888776809
P61028	Ras-related protein Rab-8B OS=Mus musculus OX=10090 GN=Rab8b PE=1 SV=1	3	72133061	6.6917e+07	42374201	6.51684e+07	67453026	54633321	65681006	62071388	65693174
P61079	Ubiquitin-conjugating enzyme E2 D3 OS=Mus musculus OX=10090 GN=Ube2d3 PE=1 SV=1	3	191466315	149711206	1.28747e+08	150994457	156969530	1.52867e+08	1.56956e+08	143927117	1.50723e+08
P61082	NEDD8-conjugating enzyme Ubc12 OS=Mus musculus OX=10090 GN=Ube2m PE=1 SV=1	8	3.0544e+08	2.59434e+08	3.50963e+08	211786910	2.45171e+08	2.16663e+08	251569369	235372107	2.43252e+08
P61087	Ubiquitin-conjugating enzyme E2 K OS=Mus musculus OX=10090 GN=Ube2k PE=1 SV=3	1	11145160	11132514	10550493	9216380	12142464		11574614	10323699	11118470
P61089	Ubiquitin-conjugating enzyme E2 N OS=Mus musculus OX=10090 GN=Ube2n PE=1 SV=1	2	30477396	27562294	18928794	32045579	3.35303e+07	19287666	3.15058e+07	28747087	24323790
P61161	Actin-related protein 2 OS=Mus musculus OX=10090 GN=Actr2 PE=1 SV=1	14	7.53824e+08	5.97866e+08	3.99913e+08	4.85144e+08	4.79851e+08	3.98911e+08	5.17074e+08	478492127	4.89228e+08
P61164	Alpha-centractin OS=Mus musculus OX=10090 GN=Actr1a PE=1 SV=1	11	4.95099e+08	386139753	2.90701e+08	3.97978e+08	4.03646e+08	329606774	3.12388e+08	3.87439e+08	400002901
P61202	COP9 signalosome complex subunit 2 OS=Mus musculus OX=10090 GN=Cops2 PE=1 SV=1	3	1.84797e+07	6720666	35408137	25319416	2789458	4.83467e+06	1.11422e+07	1.79935e+07	10172257
P61205	ADP-ribosylation factor 3 OS=Mus musculus OX=10090 GN=Arf3 PE=2 SV=2	14	2432037387	2207326037	1431941612	2086170711	2386066445	1738372421	1945674603	1876869483	1987695869
P61211	ADP-ribosylation factor-like protein 1 OS=Mus musculus OX=10090 GN=Arl1 PE=1 SV=1	4	6.33577e+07	69109250	3.38691e+07	6.39269e+07	62042054	5.11737e+07	49957242	5.80775e+07	5.25882e+07
P61215	Carbonic anhydrase-related protein 10 OS=Mus musculus OX=10090 GN=Ca10 PE=1 SV=1	1	9798550	12479199	4.96984e+06	17204726		5364188	8951296	11983250	3.01465e+06
P61222	ATP-binding cassette sub-family E member 1 OS=Mus musculus OX=10090 GN=Abce1 PE=1 SV=1	9	1.00892e+08	9.22847e+07	6.79163e+07	6.56195e+07	8.42934e+07	5.59468e+07	6.54651e+07	7.40971e+07	7.62347e+07
P61226	Ras-related protein Rap-2b OS=Mus musculus OX=10090 GN=Rap2b PE=1 SV=1	1	19183198	16260902	11121069	16573391	22521362	12813689	16458018	15996720	17569592
P61264	Syntaxin-1B OS=Mus musculus OX=10090 GN=Stx1b PE=1 SV=1	17	1320256327	1217713883	653139534	1029527346	1061391612	835859506	1022072648	9.97907e+08	1023737364
P61294	Ras-related protein Rab-6B OS=Mus musculus OX=10090 GN=Rab6b PE=1 SV=1	1	13116280	13585105	9708108	6.27235e+06	8.0322e+06	7.47263e+06	8149141	8946705	7339383
P61327	Protein mago nashi homolog OS=Mus musculus OX=10090 GN=Magoh PE=2 SV=1	1	15205694	15460772	7.14677e+06	9886213	12934166	13533023	11517477	13433159	10691583
P61358	60S ribosomal protein L27 OS=Mus musculus OX=10090 GN=Rpl27 PE=1 SV=2	2	9.0482e+06	7.38057e+06	1.22973e+07	1.02018e+07	7.28032e+06	7.23681e+06	9.29057e+06	4575070	7652410
P61620	Protein transport protein Sec61 subunit alpha isoform 1 OS=Mus musculus OX=10090 GN=Sec61a1 PE=1 SV=2	4	61974839	6.03582e+07	40520141	7.40359e+07	100558114	5.69248e+07	67870930	5.56321e+07	5.99923e+07
P61750	ADP-ribosylation factor 4 OS=Mus musculus OX=10090 GN=Arf4 PE=1 SV=2	2	79697498	76991906	5.97839e+07	6.05278e+07	91721472	67521430	75001404	74827974	81085868
P61759	Prefoldin subunit 3 OS=Mus musculus OX=10090 GN=Vbp1 PE=1 SV=2	4	45453283	5.56899e+07	3.74748e+07	2.49435e+07	3.07031e+07	4.63449e+06	2.29983e+07	2.57467e+07	2.99266e+07
P61793	Lysophosphatidic acid receptor 1 OS=Mus musculus OX=10090 GN=Lpar1 PE=1 SV=1	1	6.21386e+06	5.58291e+06	4058061	5491850	5.8709e+06	4177156	5.62284e+06	4873157	5170342
P61924	Coatomer subunit zeta-1 OS=Mus musculus OX=10090 GN=Copz1 PE=1 SV=1	1	8293692	7.54384e+06		7592985	8064224	5.13804e+06	6930951	6.31443e+06	7972725
P61957	Small ubiquitin-related modifier 2 OS=Mus musculus OX=10090 GN=Sumo2 PE=1 SV=1	2	4.11811e+07	5.19195e+07	25225438	33008252	55368154	37709543	3.74898e+07	32619580	36856823
P61963	DDB1- and CUL4-associated factor 7 OS=Mus musculus OX=10090 GN=Dcaf7 PE=1 SV=1	5	120574090	128651144	119242801	1.11467e+08	8.39074e+07	9.74068e+07	58064896	98721456	94466310
P61967	AP-1 complex subunit sigma-1A OS=Mus musculus OX=10090 GN=Ap1s1 PE=1 SV=1	2	1.33995e+07	11178096	1.49344e+07	13811894	19011185	10633021	1.09817e+07	1.38895e+07	1.24335e+07
P61971	Nuclear transport factor 2 OS=Mus musculus OX=10090 GN=Nutf2 PE=1 SV=1	3	86244511	84189826	69136958	80067059	92798259	6.18441e+07	78735952	79460416	79695610
P61979	Heterogeneous nuclear ribonucleoprotein K OS=Mus musculus OX=10090 GN=Hnrnpk PE=1 SV=1	16	421175641	342535244	2.6696e+08	234594635	237285558	2.06942e+08	2.59181e+08	271040368	2.65575e+08
P61982	14-3-3 protein gamma OS=Mus musculus OX=10090 GN=Ywhag PE=1 SV=2	20	3867471690	3313828809	2940028138	3596883593	3708080129	2915480770	3296558927	3323237227	3347598503
P62071	Ras-related protein R-Ras2 OS=Mus musculus OX=10090 GN=Rras2 PE=1 SV=1	7	204001187	163575956	1.31928e+08	164686727	168830090	1.45173e+08	149228167	173235889	160486474
P62082	40S ribosomal protein S7 OS=Mus musculus OX=10090 GN=Rps7 PE=2 SV=1	3	20863060	1.71054e+07	20518309	15231939	2.44685e+07	1.33218e+07	1.78524e+07	1.74509e+07	1.9275e+07
P62137	Serine/threonine-protein phosphatase PP1-alpha catalytic subunit OS=Mus musculus OX=10090 GN=Ppp1ca PE=1 SV=1	12	6.46775e+08	4.9209e+08	5.00265e+08	2.85467e+08	2.67765e+08	2.57012e+08	400208467	385146815	417934151
P62141	Serine/threonine-protein phosphatase PP1-beta catalytic subunit OS=Mus musculus OX=10090 GN=Ppp1cb PE=1 SV=3	2	159383293	1.27004e+08	134214310	107856928	110000601	9.49451e+07	1.23003e+08	120891835	1.24306e+08
P62192	26S proteasome regulatory subunit 4 OS=Mus musculus OX=10090 GN=Psmc1 PE=1 SV=1	23	1118263000	9.9593e+08	704059824	2.98153e+08	2.90571e+08	2.32245e+08	5.14681e+08	598373716	5.54445e+08
P62196	26S proteasome regulatory subunit 8 OS=Mus musculus OX=10090 GN=Psmc5 PE=1 SV=1	9	1.249e+08	9.79312e+07	6.04618e+07	44617334	6.11637e+07	74054680	7.5176e+07	71141035	8.73044e+07
P62242	40S ribosomal protein S8 OS=Mus musculus OX=10090 GN=Rps8 PE=1 SV=2	4	60757569	36719106	1.88302e+07	3.66714e+07	4.20319e+07	3.08342e+07	40614877	3.96536e+07	39537556
P62259	14-3-3 protein epsilon OS=Mus musculus OX=10090 GN=Ywhae PE=1 SV=1	20	3844959306	3652432295	2712302199	3747533130	3921752695	3031255065	3319015834	3456346533	3474028903
P62267	40S ribosomal protein S23 OS=Mus musculus OX=10090 GN=Rps23 PE=1 SV=3	3	50492794	26494018	33575094	23202905	24295752	21237703	20321566	37789017	40126734
P62281	40S ribosomal protein S11 OS=Mus musculus OX=10090 GN=Rps11 PE=1 SV=3	6	6.66067e+07	6.53228e+07	66411762	6.27818e+07	7.18939e+07	4.71575e+07	63688316	3.53778e+07	6.37176e+07
P62301	40S ribosomal protein S13 OS=Mus musculus OX=10090 GN=Rps13 PE=1 SV=2	2	6533446	7.51694e+06	19220509	1.30161e+07	2.02215e+07	10562255	1.52133e+07	18624436	1.6981e+07
P62307	Small nuclear ribonucleoprotein F OS=Mus musculus OX=10090 GN=Snrpf PE=1 SV=1	1	7628028	13011412	7.54485e+06	11168906	11597517	8772807	7.16885e+06	10767315	10374242
P62309	Small nuclear ribonucleoprotein G OS=Mus musculus OX=10090 GN=Snrpg PE=1 SV=1	1	11184521	12446153	8.34999e+06	11590319	15562920	8972067	11622673	10738328	10659175
P62320	Small nuclear ribonucleoprotein Sm D3 OS=Mus musculus OX=10090 GN=Snrpd3 PE=1 SV=1	2	48741178	39627005	47401292	34556736	22540194	30072480	32130791	37670171	37542614
P62331	ADP-ribosylation factor 6 OS=Mus musculus OX=10090 GN=Arf6 PE=1 SV=2	6	1.41105e+08	130022610	7.66503e+07	1.07644e+08	127723896	115623527	114231271	1.14069e+08	123464445
P62334	26S proteasome regulatory subunit 10B OS=Mus musculus OX=10090 GN=Psmc6 PE=1 SV=1	5	60088756	4.66298e+07	3.74998e+07	32653488	36632624	21681440	4.38966e+07	4.26693e+07	33114429
P62482	Voltage-gated potassium channel subunit beta-2 OS=Mus musculus OX=10090 GN=Kcnab2 PE=1 SV=1	10	2.25263e+08	1.81064e+08	1.43129e+08	206273072	1.83426e+08	1.56275e+08	1.62662e+08	180984962	1.79337e+08
P62484	Abl interactor 2 OS=Mus musculus OX=10090 GN=Abi2 PE=1 SV=1	4	347358213	222655809	182338807	41471312	44649246	37134089	1.27294e+08	137287277	131575466
P62631	Elongation factor 1-alpha 2 OS=Mus musculus OX=10090 GN=Eef1a2 PE=1 SV=1	35	12312464507	10531274072	8661025243	9859215381	10458958850	8926848274	10038542919	10140148969	9945369022
P62702	40S ribosomal protein S4, X isoform OS=Mus musculus OX=10090 GN=Rps4x PE=1 SV=2	7	124363338	99317224	71982337	9.21061e+07	1.09151e+08	7.39896e+07	99643265	1.01531e+08	9.86775e+07
P62715	Serine/threonine-protein phosphatase 2A catalytic subunit beta isoform OS=Mus musculus OX=10090 GN=Ppp2cb PE=1 SV=1	9	718962502	603109986	444232183	530889858	500015220	543670592	578141172	562182190	602354808
P62717	60S ribosomal protein L18a OS=Mus musculus OX=10090 GN=Rpl18a PE=1 SV=1	2	29542987	20227712	45144649	33199492	31088319	3.3026e+07	2.18566e+07	32914774	32135268
P62743	AP-2 complex subunit sigma OS=Mus musculus OX=10090 GN=Ap2s1 PE=1 SV=1	3	302618734	259921034	215092828	273251472	305034769	239606065	252680067	251436168	237674089
P62746	Rho-related GTP-binding protein RhoB OS=Mus musculus OX=10090 GN=Rhob PE=1 SV=1	5	283622671	280373977	259653973	2.20342e+08	268391109	214342347	2.54976e+08	2.49107e+08	239119711
P62748	Hippocalcin-like protein 1 OS=Mus musculus OX=10090 GN=Hpcal1 PE=1 SV=2	2	25167358	20639799	8.65227e+06			3.94419e+06	7440100	9.25539e+06	11200489
P62754	40S ribosomal protein S6 OS=Mus musculus OX=10090 GN=Rps6 PE=1 SV=1	3	37510679	3.46055e+07	1.5288e+07	40564203	4.33805e+07	3.16372e+07	2.30811e+07	1.99893e+07	21983592
P62761	Visinin-like protein 1 OS=Mus musculus OX=10090 GN=Vsnl1 PE=1 SV=2	18	1543343508	1229194661	8.66369e+08	6.196e+08	559305534	4.23283e+08	7.9686e+08	790391245	8.20577e+08
P62774	Myotrophin OS=Mus musculus OX=10090 GN=Mtpn PE=1 SV=2	3	49988207	61800980	7.20081e+06	112895624	119033518	31170992	54775846	87783646	84835374
P62806	Histone H4 OS=Mus musculus OX=10090 GN=Hist1h4a PE=1 SV=2	5	220616067	3.32463e+08	180200487	193011998	338730930	2.2601e+08	2.37636e+08	2.54429e+08	2.78692e+08
P62812	Gamma-aminobutyric acid receptor subunit alpha-1 OS=Mus musculus OX=10090 GN=Gabra1 PE=1 SV=1	12	606229353	498507148	3.30632e+08	2.76683e+08	292657915	1.93593e+08	3.42232e+08	358564273	3.45935e+08
P62814	V-type proton ATPase subunit B, brain isoform OS=Mus musculus OX=10090 GN=Atp6v1b2 PE=1 SV=1	33	4464366090	3441472658	3339626673	3346460098	3284299869	3019066105	3304047395	3385202956	3452578181
P62821	Ras-related protein Rab-1A OS=Mus musculus OX=10090 GN=Rab1A PE=1 SV=3	17	2331474175	2070665411	1576665753	1859374763	2866620621	1649582284	1917770613	1915572060	1967138922
P62823	Ras-related protein Rab-3C OS=Mus musculus OX=10090 GN=Rab3c PE=1 SV=1	7	2.47352e+08	223976987	1.46726e+08	195386662	2.3855e+08	1.60755e+08	177852466	204589779	204177216
P62827	GTP-binding nuclear protein Ran OS=Mus musculus OX=10090 GN=Ran PE=1 SV=3	12	1138165140	1096343154	957622666	1004407010	1172864392	9.15697e+08	995604300	1041971006	1054529971
P62830	60S ribosomal protein L23 OS=Mus musculus OX=10090 GN=Rpl23 PE=1 SV=1	4	59866647	52189111	54444084	46504372	56199480	4.19427e+07	4.82358e+07	46545314	49915885
P62835	Ras-related protein Rap-1A OS=Mus musculus OX=10090 GN=Rap1a PE=1 SV=1	7	708922285	595332703	439609177	580679637	599918531	514828976	543339843	552081477	562375644
P62838	Ubiquitin-conjugating enzyme E2 D2 OS=Mus musculus OX=10090 GN=Ube2d2 PE=1 SV=1	1	2.26688e+06	22671160	11484052	21257646	21131498	17670112	19543392	17956602	20467424
P62858	40S ribosomal protein S28 OS=Mus musculus OX=10090 GN=Rps28 PE=1 SV=1	1	16717134	20756718	4.83767e+06	18684350	24593386	17722438	15784452	16498612	15135245
P62869	Elongin-B OS=Mus musculus OX=10090 GN=Elob PE=1 SV=1	7	235774583	196308893	1.07324e+08	94881107	1.12505e+08	78928292	133639069	137427451	129416951
P62874	Guanine nucleotide-binding protein G(I)/G(S)/G(T) subunit beta-1 OS=Mus musculus OX=10090 GN=Gnb1 PE=1 SV=3	3	8.32182e+07	96648503	39024806	77621871	85391871	7.20216e+07	8.95434e+07	9.90857e+07	100545877
P62880	Guanine nucleotide-binding protein G(I)/G(S)/G(T) subunit beta-2 OS=Mus musculus OX=10090 GN=Gnb2 PE=1 SV=3	13	5625503759	4515963969	3022745704	4749664347	4783132714	4605442999	4382725626	4369041095	4391510152
P62881	Guanine nucleotide-binding protein subunit beta-5 OS=Mus musculus OX=10090 GN=Gnb5 PE=1 SV=1	8	294222251	260480426	1.55976e+08	234682217	253577043	223624978	256459807	2.58268e+08	267150946
P62889	60S ribosomal protein L30 OS=Mus musculus OX=10090 GN=Rpl30 PE=1 SV=2	2	3.53172e+06	7.88961e+06	8819475	2.09801e+07	5.98459e+06	5.31731e+06	16958282	1.48053e+07	5.9088e+06
P62908	40S ribosomal protein S3 OS=Mus musculus OX=10090 GN=Rps3 PE=1 SV=1	12	388174422	367999086	334106701	340014618	414257921	363058263	3.56392e+08	357449195	358961954
P62918	60S ribosomal protein L8 OS=Mus musculus OX=10090 GN=Rpl8 PE=1 SV=2	2	37595819	21815651	17566478	21746618	22632760	19874930	23524266	23520154	23002605
P62962	Profilin-1 OS=Mus musculus OX=10090 GN=Pfn1 PE=1 SV=2	11	1575634486	1413477382	1107955320	1597690790	1686422620	1474374237	1238474520	1493247197	1521843095
P62983	Ubiquitin-40S ribosomal protein S27a OS=Mus musculus OX=10090 GN=Rps27a PE=1 SV=2	11	1861222818	2646183210	1679731163	1017663041	1194141535	9.7495e+08	1267018462	1339097478	1270586457
P63001	Ras-related C3 botulinum toxin substrate 1 OS=Mus musculus OX=10090 GN=Rac1 PE=1 SV=1	10	1156636241	1220943108	1008538028	1040637255	1143022485	8.83437e+08	1090556411	1083873286	1074134570
P63005	Platelet-activating factor acetylhydrolase IB subunit alpha OS=Mus musculus OX=10090 GN=Pafah1b1 PE=1 SV=2	23	1392796557	1266027719	9.36474e+08	1250463740	1294289752	1152805854	1157384270	1184355644	1215180190
P63011	Ras-related protein Rab-3A OS=Mus musculus OX=10090 GN=Rab3a PE=1 SV=1	12	2829848147	2459410545	1620238546	2492756990	2730170735	2266185970	2347580091	2306675329	2368474417
P63017	Heat shock cognate 71 kDa protein OS=Mus musculus OX=10090 GN=Hspa8 PE=1 SV=1	61	14580418090	13978992641	11285587767	12890808866	14587600932	10915361884	12840154224	12831223183	13071389116
P63028	Translationally-controlled tumor protein OS=Mus musculus OX=10090 GN=Tpt1 PE=1 SV=1	4	2.20105e+08	2.0429e+08	135774220	1.58154e+08	2.04898e+08	1.29068e+08	166387638	1.74417e+08	175337738
P63037	DnaJ homolog subfamily A member 1 OS=Mus musculus OX=10090 GN=Dnaja1 PE=1 SV=1	14	464137747	3.99864e+08	2.60652e+08	3.36479e+08	3.8751e+08	2.87821e+08	332272073	3.54877e+08	3.43679e+08
P63040	Complexin-1 OS=Mus musculus OX=10090 GN=Cplx1 PE=1 SV=1	2	66320038	81638402	50410730	23815159	28121211	15776863	36537333	43366730	44724565
P63044	Vesicle-associated membrane protein 2 OS=Mus musculus OX=10090 GN=Vamp2 PE=1 SV=2	3	65564577	63416447	3.5795e+07	44873716	49922293	4.25622e+07	42444312	55760804	49445175
P63046	Sulfotransferase 4A1 OS=Mus musculus OX=10090 GN=Sult4a1 PE=1 SV=1	5	4.92656e+07	3.17635e+07	15029036	3.68124e+07	3.05281e+07	2.73035e+07	3.11958e+07	3.0081e+07	3.4138e+07
P63073	Eukaryotic translation initiation factor 4E OS=Mus musculus OX=10090 GN=Eif4e PE=1 SV=1	4	58408349	42056990	37476058	42644092	41954412	4.02086e+07	49309856	4.54965e+07	45053379
P63085	Mitogen-activated protein kinase 1 OS=Mus musculus OX=10090 GN=Mapk1 PE=1 SV=3	14	799963099	562654362	5.26178e+08	450648884	4.46339e+08	347973586	497948995	517718892	516312251
P63087	Serine/threonine-protein phosphatase PP1-gamma catalytic subunit OS=Mus musculus OX=10090 GN=Ppp1cc PE=1 SV=1	3	258001050	195828114	181774102	8.45629e+07	9.12389e+07	7.36455e+07	1.40906e+08	1.47795e+08	1.42722e+08
P63101	14-3-3 protein zeta/delta OS=Mus musculus OX=10090 GN=Ywhaz PE=1 SV=1	22	5655952024	4955569100	3881715771	5030345500	5199545878	3939761676	4629461902	4808913571	4766018642
P63137	Gamma-aminobutyric acid receptor subunit beta-2 OS=Mus musculus OX=10090 GN=Gabrb2 PE=1 SV=2	4	80069911	65704416	36405276	62473085	7.907e+07	56750943	51959588	63447448	59769085
P63143	Voltage-gated potassium channel subunit beta-1 OS=Mus musculus OX=10090 GN=Kcnab1 PE=1 SV=2	1									6266429
P63158	High mobility group protein B1 OS=Mus musculus OX=10090 GN=Hmgb1 PE=1 SV=2	5	138276641	129275636	140982501	8.14756e+07	1.24121e+08	8.04893e+07	120528037	1.20778e+08	1.13508e+08
P63163	Small nuclear ribonucleoprotein-associated protein N OS=Mus musculus OX=10090 GN=Snrpn PE=1 SV=1	4	60185755	63784085	4.81326e+07	55590805	62922622	45758726	59298159	55343524	56505093
P63168	Dynein light chain 1, cytoplasmic OS=Mus musculus OX=10090 GN=Dynll1 PE=1 SV=1	5	172029854	171231239	90799185	160389348	201280843	139999103	138916424	1.3517e+08	129275227
P63216	Guanine nucleotide-binding protein G(I)/G(S)/G(O) subunit gamma-3 OS=Mus musculus OX=10090 GN=Gng3 PE=1 SV=1	2	16098496	16556578	9.50654e+06	18810626	1.61952e+07	10878136	15849506	1.44361e+07	13362292
P63242	Eukaryotic translation initiation factor 5A-1 OS=Mus musculus OX=10090 GN=Eif5a PE=1 SV=2	12	816849976	7.32162e+08	4.91789e+08	5.27663e+08	551161246	4.30409e+08	5.52198e+08	590559356	5.69036e+08
P63250	G protein-activated inward rectifier potassium channel 1 OS=Mus musculus OX=10090 GN=Kcnj3 PE=1 SV=1	3	35301713	2.38407e+07	1.25741e+07	8489145		8.64909e+06	1.81412e+07	17725691	16723413
P63276	40S ribosomal protein S17 OS=Mus musculus OX=10090 GN=Rps17 PE=1 SV=2	3	29947248	5.50643e+07	33435421	20553267	38576611	2.49817e+07	48809671	4.96388e+07	4.99535e+07
P63280	SUMO-conjugating enzyme UBC9 OS=Mus musculus OX=10090 GN=Ube2i PE=1 SV=1	2	24903541	44585968	26240000	36839124	43296717	2.61852e+07	20041489	24777782	2.21344e+07
P63300	Selenoprotein W OS=Mus musculus OX=10090 GN=Selenow PE=1 SV=3	3	2.91905e+07	2.5782e+07	23511463	1.81688e+07	1.99657e+07	20162026	23505573	2.24111e+07	1.85392e+07
P63318	Protein kinase C gamma type OS=Mus musculus OX=10090 GN=Prkcg PE=1 SV=1	22	1632869782	1295151558	1218289916	1137085616	1455873801	1322991725	1233373714	1298484338	1349678964
P63321	Ras-related protein Ral-A OS=Mus musculus OX=10090 GN=Rala PE=1 SV=1	8	389679024	366114292	2.48936e+08	3.13288e+08	2.74967e+08	2.47653e+08	306621285	2.9579e+08	3.33008e+08
P63323	40S ribosomal protein S12 OS=Mus musculus OX=10090 GN=Rps12 PE=1 SV=2	2	34038431	29971104	2.62131e+07	2.23138e+07	34853042	27074926	27866512	27181147	25224552
P63328	Serine/threonine-protein phosphatase 2B catalytic subunit alpha isoform OS=Mus musculus OX=10090 GN=Ppp3ca PE=1 SV=1	28	3240001179	2593867095	2443136993	2080006288	2097216277	1766567985	2233636668	2335031704	2373706619
P63330	Serine/threonine-protein phosphatase 2A catalytic subunit alpha isoform OS=Mus musculus OX=10090 GN=Ppp2ca PE=1 SV=1	1		109175272	81697736	93485088	76023784	88950056		95909800	84528328
P67984	60S ribosomal protein L22 OS=Mus musculus OX=10090 GN=Rpl22 PE=1 SV=2	3	73650184	85692026	8.71426e+07	70747920	101958222	71191621	8.01935e+07	7.9566e+07	8.2564e+07
P68033	Actin, alpha cardiac muscle 1 OS=Mus musculus OX=10090 GN=Actc1 PE=1 SV=1	9	4613033558	4562610472	2173272135	4249578484	4292769926	3672950561	3300296470	3147520877	3109302848
P68037	Ubiquitin-conjugating enzyme E2 L3 OS=Mus musculus OX=10090 GN=Ube2l3 PE=1 SV=1	4	166807863	165612310	1.23749e+08	1.70746e+08	1.59575e+08	118928939	129021646	146294350	162573039
P68040	Receptor of activated protein C kinase 1 OS=Mus musculus OX=10090 GN=Rack1 PE=1 SV=3	12	440819238	415076292	467357469	400551908	511630834	4.54723e+08	439140534	443267507	505019794
P68181	cAMP-dependent protein kinase catalytic subunit beta OS=Mus musculus OX=10090 GN=Prkacb PE=1 SV=2	20	1267632530	1220668837	1138235913	1181845323	1460010102	1041500603	1178546233	1151371370	1135174883
P68254	14-3-3 protein theta OS=Mus musculus OX=10090 GN=Ywhaq PE=1 SV=1	12	7.08255e+08	606111859	3.93927e+08	6.088e+08	5.91868e+08	4.5126e+08	5.37368e+08	5.45488e+08	5.52993e+08
P68368	Tubulin alpha-4A chain OS=Mus musculus OX=10090 GN=Tuba4a PE=1 SV=1	11	3204658682	2148322506	2427329923	2501526501	2825887030	2616874108	2236855289	2309554708	2264017165
P68369	Tubulin alpha-1A chain OS=Mus musculus OX=10090 GN=Tuba1a PE=1 SV=1	50	108000000000	88908767328	77791886338	89909704901	90458955387	76081781793	85023330838	85868907428	87462020604
P68372	Tubulin beta-4B chain OS=Mus musculus OX=10090 GN=Tubb4b PE=1 SV=1	65	125000000000	107000000000	86747685282	110000000000	114000000000	96978326663	104000000000	101000000000	105000000000
P68404	Protein kinase C beta type OS=Mus musculus OX=10090 GN=Prkcb PE=1 SV=4	17	5.91008e+08	5.25831e+08	471312522	4.7414e+08	5.81464e+08	5.07394e+08	5.03939e+08	507764311	542202089
P68510	14-3-3 protein eta OS=Mus musculus OX=10090 GN=Ywhah PE=1 SV=2	25	6270891609	5692720840	4173775078	5627800915	5863063796	4560403794	5339418775	5309486343	5253857005
P69566	Ran-binding protein 9 OS=Mus musculus OX=10090 GN=Ranbp9 PE=1 SV=1	3	2.34663e+07	4.35081e+07	22164380	16603924	1.26181e+07	35483859	2.96369e+07	34302979	3.79816e+07
P70122	Ribosome maturation protein SBDS OS=Mus musculus OX=10090 GN=Sbds PE=1 SV=4	4	3.81927e+07	3.14917e+07	3.02251e+07	2.71676e+07	2.61423e+07	2.82814e+07	22231411	2.70154e+07	34189465
P70168	Importin subunit beta-1 OS=Mus musculus OX=10090 GN=Kpnb1 PE=1 SV=2	6	9.15631e+07	8.17542e+07	8.00862e+07	6.7402e+07	87102883	3.94763e+07	6.50335e+07	8.13679e+07	90294758
P70175	Disks large homolog 3 OS=Mus musculus OX=10090 GN=Dlg3 PE=1 SV=1	19	570474270	442756383	310399441	1.89756e+08	2.49085e+08	1.784e+08	2.84285e+08	2.78042e+08	3.40989e+08
P70195	Proteasome subunit beta type-7 OS=Mus musculus OX=10090 GN=Psmb7 PE=1 SV=1	4	93222270	68325232	4.40963e+07	66719384	6.8708e+07	55506466	6.41779e+07	7.76372e+07	6.00087e+07
P70202	Latexin OS=Mus musculus OX=10090 GN=Lxn PE=1 SV=2	3	138084496	106560670	56729268	103387834	120157504	92765292	98951982	102932124	97605366
P70206	Plexin-A1 OS=Mus musculus OX=10090 GN=Plxna1 PE=1 SV=1	14	231185062	194816164	1.1797e+08	181575702	185031965	1.57505e+08	1.53499e+08	183835419	1.74029e+08
P70207	Plexin-A2 OS=Mus musculus OX=10090 GN=Plxna2 PE=1 SV=2	1	6.46287e+06	5029157	6.03478e+06	10696792	7929056	6823751	7524862	6683801	4507117
P70208	Plexin-A3 OS=Mus musculus OX=10090 GN=Plxna3 PE=1 SV=2	1	4196632	2.37698e+06		3.72057e+06	5605244	1524267	3.1126e+06	3.90246e+06	3977485
P70232	Neural cell adhesion molecule L1-like protein OS=Mus musculus OX=10090 GN=Chl1 PE=1 SV=2	5	7.68672e+07	5.83925e+07	42920320	6.0522e+07	8.52846e+07	4.66203e+07	57472620	4.47583e+07	5.2782e+07
P70236	Dual specificity mitogen-activated protein kinase kinase 6 OS=Mus musculus OX=10090 GN=Map2k6 PE=1 SV=1	5	4.02728e+08	426126992	4.09262e+08	527257362	451703122	344527412	4.16773e+08	4.43451e+08	413529597
P70288	Histone deacetylase 2 OS=Mus musculus OX=10090 GN=Hdac2 PE=1 SV=1	6	1.96686e+08	2.18559e+08	167255821	2.31356e+08	244092876	224896570	208882438	217238055	2.33221e+08
P70296	Phosphatidylethanolamine-binding protein 1 OS=Mus musculus OX=10090 GN=Pebp1 PE=1 SV=3	15	3727018344	3078920104	1674547653	1965328442	2146004514	1699215923	2366187812	2286402200	2308380237
P70297	Signal transducing adapter molecule 1 OS=Mus musculus OX=10090 GN=Stam PE=1 SV=3	7	1.54029e+08	84894629	52471159	8.82373e+06	1.67691e+07	3106923	79063304	59339812	60749674
P70318	Nucleolysin TIAR OS=Mus musculus OX=10090 GN=Tial1 PE=1 SV=1	5	70489983	53190837	40968361	5.94097e+07	6.91375e+07	5.8068e+07	7.21172e+07	62018836	6.49426e+07
P70333	Heterogeneous nuclear ribonucleoprotein H2 OS=Mus musculus OX=10090 GN=Hnrnph2 PE=1 SV=1	2	37418516	3.28728e+07	2.61669e+07	3.4336e+07	41383433	3.19915e+07	28726677	3.00865e+07	29595664
P70336	Rho-associated protein kinase 2 OS=Mus musculus OX=10090 GN=Rock2 PE=1 SV=1	24	1526846256	1302424640	9.23659e+08	1275572468	1303083856	1079476161	1104057190	1256260309	1182434976
P70362	Ubiquitin recognition factor in ER-associated degradation protein 1 OS=Mus musculus OX=10090 GN=Ufd1 PE=1 SV=2	5	56085563	33021681	36174827	3.3032e+07	45040807	2.57931e+07	49049734	5.2846e+07	46569967
P70372	ELAV-like protein 1 OS=Mus musculus OX=10090 GN=Elavl1 PE=1 SV=2	13	281567838	231351151	2.01771e+08	1.83109e+08	1.81365e+08	1.74307e+08	197617965	213483159	2.06234e+08
P70379	Fibroblast growth factor 14 OS=Mus musculus OX=10090 GN=Fgf14 PE=2 SV=1	2	35297711	34814594	27787146	2.49272e+07	29581383	28866565	29025302	28987458	28517056
P70392	Ras-specific guanine nucleotide-releasing factor 2 OS=Mus musculus OX=10090 GN=Rasgrf2 PE=1 SV=2	3	57894880	7.63153e+06	8.95531e+06	55717322	4.9557e+07	4.49595e+07	2.67393e+06	9.837e+06	63718378
P70398	Probable ubiquitin carboxyl-terminal hydrolase FAF-X OS=Mus musculus OX=10090 GN=Usp9x PE=1 SV=2	35	5.08703e+08	3.73041e+08	390708575	4.45812e+08	4.82398e+08	4.68493e+08	4.28366e+08	4.42021e+08	4.51235e+08
P70414	Sodium/calcium exchanger 1 OS=Mus musculus OX=10090 GN=Slc8a1 PE=1 SV=1	11	382352289	3.47365e+08	2.20415e+08	2.97241e+08	2.79779e+08	2.66462e+08	2.98669e+08	2.79658e+08	289747803
P70429	Ena/VASP-like protein OS=Mus musculus OX=10090 GN=Evl PE=1 SV=2	6	4.31166e+07	3.90926e+07	2.85511e+07	3.76109e+07	41933137	2.90576e+07	3.20704e+07	3.64111e+07	3.43065e+07
P70441	Na(+)/H(+) exchange regulatory cofactor NHE-RF1 OS=Mus musculus OX=10090 GN=Slc9a3r1 PE=1 SV=3	3	31491401	32040334	1.1019e+07	2.57617e+07	2.03528e+07	1.40684e+07	24684213	2.33389e+07	2.20005e+07
P70670	Nascent polypeptide-associated complex subunit alpha, muscle-specific form OS=Mus musculus OX=10090 GN=Naca PE=1 SV=2	3	104067357	122559127	30995859	2.52587e+07	3.99062e+07	17291437	5.60482e+07	5.13282e+07	5.28601e+07
P70677	Caspase-3 OS=Mus musculus OX=10090 GN=Casp3 PE=1 SV=1	3	72467000	79718939	4.21777e+07	8.09744e+07	8.50568e+07	7.40012e+07	7.01103e+07	6.57039e+07	7.43768e+07
P70698	CTP synthase 1 OS=Mus musculus OX=10090 GN=Ctps1 PE=1 SV=2	5	57267529	41062469	28798699	46572559	33366850	3.00686e+07	3.5701e+07	31880120	3.54942e+07
P70699	Lysosomal alpha-glucosidase OS=Mus musculus OX=10090 GN=Gaa PE=1 SV=2	5	4.65368e+07	4.86618e+07	46587505	40922878	41710608	44921303	4.34393e+07	3.66693e+07	3.81686e+07
P70704	Phospholipid-transporting ATPase IA OS=Mus musculus OX=10090 GN=Atp8a1 PE=1 SV=2	15	357025745	3.08348e+08	2.87372e+08	2.71763e+08	302389951	3.50118e+08	295757875	3.72098e+08	328353260
P80314	T-complex protein 1 subunit beta OS=Mus musculus OX=10090 GN=Cct2 PE=1 SV=4	17	3.60004e+08	299049726	2.48248e+08	2.52064e+08	2.65504e+08	168057409	237217279	2.59171e+08	2.72057e+08
P80315	T-complex protein 1 subunit delta OS=Mus musculus OX=10090 GN=Cct4 PE=1 SV=3	20	714793957	6.01116e+08	6.84832e+08	6.0271e+08	6.35935e+08	5.15343e+08	6.07606e+08	622351936	6.22784e+08
P80316	T-complex protein 1 subunit epsilon OS=Mus musculus OX=10090 GN=Cct5 PE=1 SV=1	30	2319341038	2082149267	1473863431	1061426895	9.79251e+08	8.85226e+08	1338764997	1344815269	1417334471
P80317	T-complex protein 1 subunit zeta OS=Mus musculus OX=10090 GN=Cct6a PE=1 SV=3	22	1321304130	1091191175	860104656	7.07633e+08	722968349	6.47288e+08	863944716	8.30129e+08	8.55512e+08
P80318	T-complex protein 1 subunit gamma OS=Mus musculus OX=10090 GN=Cct3 PE=1 SV=1	20	523468957	4.56851e+08	3.61547e+08	4.90418e+08	479639063	3.82217e+08	4.95447e+08	4.78435e+08	4.75337e+08
P80560	Receptor-type tyrosine-protein phosphatase N2 OS=Mus musculus OX=10090 GN=Ptprn2 PE=1 SV=2	1	8.00635e+06	8863351	7495729	5.15133e+06	6542668	8.30101e+06	5804496	6.7292e+06	5697729
P83510	Traf2 and NCK-interacting protein kinase OS=Mus musculus OX=10090 GN=Tnik PE=1 SV=2	10	1.39642e+08	1.28959e+08	8.63721e+07	6.42852e+07	6.91001e+07	6.16862e+07	1.07409e+08	9.59491e+07	1.0595e+08
P83940	Elongin-C OS=Mus musculus OX=10090 GN=Eloc PE=1 SV=1	5	238472194	196501724	80759643	205461134	216019846	163634950	182388394	138647710	140454190
P84075	Neuron-specific calcium-binding protein hippocalcin OS=Mus musculus OX=10090 GN=Hpca PE=1 SV=2	7	460251789	2.74775e+08	1.57653e+08	1.66207e+08	210370435	1.42552e+08	201998400	1.97913e+08	206910108
P84091	AP-2 complex subunit mu OS=Mus musculus OX=10090 GN=Ap2m1 PE=1 SV=1	24	2364635747	2032805789	1774287612	1863241630	2225042331	1762541740	1911820658	1925520928	1996056420
P84096	Rho-related GTP-binding protein RhoG OS=Mus musculus OX=10090 GN=Rhog PE=1 SV=1	2	45033094	36334985	13685100	36881632	44038320	33572788	37600023	35443210	37778644
P84099	60S ribosomal protein L19 OS=Mus musculus OX=10090 GN=Rpl19 PE=1 SV=1	2	328442027	296476864	4.15808e+08	603049216	552308736	2.71642e+08	420234764	414373152	4.21259e+08
P84104	Serine/arginine-rich splicing factor 3 OS=Mus musculus OX=10090 GN=Srsf3 PE=1 SV=1	4	177173423	93061300	62244703	124399596	1.30165e+08	87057056	1.36683e+08	102928356	107455222
P84309	Adenylate cyclase type 5 OS=Mus musculus OX=10090 GN=Adcy5 PE=1 SV=2	8	93225365	8.38284e+07	5.6108e+07	100137230	1.01952e+08	78070412	84325229	65232274	7.65527e+07
P85094	Isochorismatase domain-containing protein 2A OS=Mus musculus OX=10090 GN=Isoc2a PE=1 SV=1	1	7488963	6769119		6308009	5.25716e+06		3.14727e+06	4672736
P97300	Neuroplastin OS=Mus musculus OX=10090 GN=Nptn PE=1 SV=3	13	1327389323	1238527131	995653806	1237423300	1344271175	1106314101	1104648142	1107228250	1145706564
P97315	Cysteine and glycine-rich protein 1 OS=Mus musculus OX=10090 GN=Csrp1 PE=1 SV=3	3	64223010	98737068	4.30157e+07	85226436	94781400	71483643	86226459	82952865	87695398
P97350	Plakophilin-1 OS=Mus musculus OX=10090 GN=Pkp1 PE=1 SV=1	3	22451798	2.388e+07	1.29128e+07	1.30718e+07	2.87447e+07	3.11281e+07	1.99539e+07	12485078	3.13511e+07
P97351	40S ribosomal protein S3a OS=Mus musculus OX=10090 GN=Rps3a PE=1 SV=3	7	162515910	1.25577e+08	97448584	1.81926e+08	216354759	159093237	1.80592e+08	1.62702e+08	1.58992e+08
P97355	Spermine synthase OS=Mus musculus OX=10090 GN=Sms PE=1 SV=1	4	49987075	33195410	28051058	34626378	30338604	38124762	3.53285e+07	3.51735e+07	35827092
P97370	Sodium/potassium-transporting ATPase subunit beta-3 OS=Mus musculus OX=10090 GN=Atp1b3 PE=1 SV=1	4	110158013	104550101	56642403	104215628	102165523	89176729	9.11744e+07	78849110	104406355
P97379	Ras GTPase-activating protein-binding protein 2 OS=Mus musculus OX=10090 GN=G3bp2 PE=1 SV=2	8	1.21572e+08	98979471	7.6615e+07	4.17246e+07	52244975	27736875	6.05047e+07	63832905	56715742
P97390	Vacuolar protein sorting-associated protein 45 OS=Mus musculus OX=10090 GN=Vps45 PE=1 SV=1	9	79018261	7.04364e+07	6.4388e+07	54300255	5.85965e+07	57658446	6.68871e+07	72733003	59011241
P97393	Rho GTPase-activating protein 5 OS=Mus musculus OX=10090 GN=Arhgap5 PE=1 SV=2	5	3.44981e+07	1.60326e+07	2.96168e+07	1.51176e+07	2.3845e+07	2.53126e+07	22301950	25524671	2.74313e+07
P97427	Dihydropyrimidinase-related protein 1 OS=Mus musculus OX=10090 GN=Crmp1 PE=1 SV=1	37	7603763908	6742715601	6364622166	6262635319	6663631863	5705615658	6303137087	6268099701	6389911345
P97441	Zinc transporter 3 OS=Mus musculus OX=10090 GN=Slc30a3 PE=1 SV=1	2	40162590	5533907	24617949	7.26089e+06	11060262	8413507	7025263	3.9167e+07	33626773
P97447	Four and a half LIM domains protein 1 OS=Mus musculus OX=10090 GN=Fhl1 PE=1 SV=3	3	63758768	67734000	39063020	125988826	57987039	4.43199e+07	54598348	5.69964e+07	4.94647e+07
P97461	40S ribosomal protein S5 OS=Mus musculus OX=10090 GN=Rps5 PE=1 SV=3	4	7.04581e+07	69695490	4.97271e+07	5.92799e+07	68566711	62921630	6.35356e+07	60536644	6.97539e+07
P97467	Peptidyl-glycine alpha-amidating monooxygenase OS=Mus musculus OX=10090 GN=Pam PE=1 SV=2	1	21163664	23406700	11490127	13764974	23302584	14914830	12853969	28239542	14557521
P97492	Regulator of G-protein signaling 14 OS=Mus musculus OX=10090 GN=Rgs14 PE=1 SV=2	1	8555378	9768567	2.54707e+06
P97494	Glutamate--cysteine ligase catalytic subunit OS=Mus musculus OX=10090 GN=Gclc PE=1 SV=4	5	56461714	37473031	34518162	53310098	43181272	3.53603e+07	44810539	42942575	4.30155e+07
P97765	WW domain-binding protein 2 OS=Mus musculus OX=10090 GN=Wbp2 PE=1 SV=1	1	1.79038e+07	1.26437e+07	13507823	14717321	1.32631e+07	12177845	11667739	1.44796e+07	1.30687e+07
P97772	Metabotropic glutamate receptor 1 OS=Mus musculus OX=10090 GN=Grm1 PE=1 SV=2	5	82711936	72631652	43923591	63330535	76954417	5.80945e+07	72150022	64766417	67405466
P97792	Coxsackievirus and adenovirus receptor homolog OS=Mus musculus OX=10090 GN=Cxadr PE=1 SV=1	14	353345281	393135012	203804531	2.5137e+08	229786145	2.31279e+08	2.68577e+08	2.96223e+08	2.79266e+08
P97797	Tyrosine-protein phosphatase non-receptor type substrate 1 OS=Mus musculus OX=10090 GN=Sirpa PE=1 SV=1	14	565788411	478854513	326830055	427037155	4.73064e+08	3.45077e+08	4.12475e+08	4.43267e+08	4.42092e+08
P97798	Neogenin OS=Mus musculus OX=10090 GN=Neo1 PE=1 SV=1	5	39768936	32653349	15538920	2.30137e+07	2.11019e+07	2.25622e+07	3.95996e+07	3.39689e+07	3.07319e+07
P97813	Phospholipase D2 OS=Mus musculus OX=10090 GN=Pld2 PE=1 SV=2	1			4.10682e+06	7378353			1.90957e+06
P97820	Mitogen-activated protein kinase kinase kinase kinase 4 OS=Mus musculus OX=10090 GN=Map4k4 PE=1 SV=1	2	8.3515e+06	7.60429e+06	3.62494e+06	7.44817e+06	7.35855e+06	9.75283e+06	8.73591e+06	7381985	5.88607e+06
P97825	Jupiter microtubule associated homolog 1 OS=Mus musculus OX=10090 GN=JPT1 PE=1 SV=3	3	110007978	183373737	933286611	135905528	162016584	126605195	221582600	263482846	2.88386e+08
P97855	Ras GTPase-activating protein-binding protein 1 OS=Mus musculus OX=10090 GN=G3bp1 PE=1 SV=1	3	65984920	45813544	30999251	8205965	6.68373e+06		29740773	26410541	27268187
P98191	Phosphatidate cytidylyltransferase 1 OS=Mus musculus OX=10090 GN=Cds1 PE=1 SV=2	1	5941325
P99024	Tubulin beta-5 chain OS=Mus musculus OX=10090 GN=Tubb5 PE=1 SV=1	10	15152942111	12789852911	12761945534	12758685955	13014896551	11549397160	12510563674	12381223667	12545021245
P99026	Proteasome subunit beta type-4 OS=Mus musculus OX=10090 GN=Psmb4 PE=1 SV=1	2	22960888	2.76572e+07	19897803	2.09038e+07	21738570	13898763	13586654	27782419	2.4574e+07
Q00493	Carboxypeptidase E OS=Mus musculus OX=10090 GN=Cpe PE=1 SV=2	6	1.33394e+08	120956832	118420373	1.31771e+08	1.54019e+08	1.08723e+08	1.12822e+08	112934863	8.88758e+07
Q00612	Glucose-6-phosphate 1-dehydrogenase X OS=Mus musculus OX=10090 GN=G6pdx PE=1 SV=3	15	2.6426e+08	2.03523e+08	1.65767e+08	1.87837e+08	1.74389e+08	1.49561e+08	1.68085e+08	1.73281e+08	1.80828e+08
Q00PI9	Heterogeneous nuclear ribonucleoprotein U-like protein 2 OS=Mus musculus OX=10090 GN=Hnrnpul2 PE=1 SV=2	16	482653581	462514012	282583686	4.33192e+08	4.72216e+08	4.18606e+08	421684816	4.49208e+08	4.10376e+08
Q01063	cAMP-specific 3',5'-cyclic phosphodiesterase 4D OS=Mus musculus OX=10090 GN=Pde4d PE=1 SV=2	2	32529512	26233478	1.85461e+07	18459541	1.06934e+07	8.78183e+06	2.06575e+07	17410101	1.3046e+07
Q01065	Calcium/calmodulin-dependent 3',5'-cyclic nucleotide phosphodiesterase 1B OS=Mus musculus OX=10090 GN=Pde1b PE=1 SV=2	14	383700843	3.47531e+08	2.67705e+08	3.15081e+08	356149467	319815067	306191924	342715711	344820806
Q01097	Glutamate receptor ionotropic, NMDA 2B OS=Mus musculus OX=10090 GN=Grin2b PE=1 SV=3	19	347534545	2.44566e+08	2.13816e+08	1.59982e+08	1.47536e+08	1.0823e+08	2.0395e+08	215923879	2.12116e+08
Q01338	Alpha-2A adrenergic receptor OS=Mus musculus OX=10090 GN=Adra2a PE=1 SV=1	1	4.89454e+06	4.27728e+06	2.33976e+06	3.29863e+06	3.93198e+06	3.37207e+06	3.95393e+06	3.62842e+06	3913214
Q01405	Protein transport protein Sec23A OS=Mus musculus OX=10090 GN=Sec23a PE=1 SV=2	14	303478775	2.85166e+08	2.49574e+08	2.91503e+08	2.90056e+08	2.4469e+08	279629198	273569738	273292720
Q01768	Nucleoside diphosphate kinase B OS=Mus musculus OX=10090 GN=Nme2 PE=1 SV=1	4	99996147	166986040	57874412	108722406	166864305	114768805	74935688	101271394	92399055
Q01853	Transitional endoplasmic reticulum ATPase OS=Mus musculus OX=10090 GN=Vcp PE=1 SV=4	47	3798153416	3087439092	2200972848	1731782240	1769126066	1477535989	2224491293	2223616237	2193255621
Q02053	Ubiquitin-like modifier-activating enzyme 1 OS=Mus musculus OX=10090 GN=Uba1 PE=1 SV=1	35	2346809990	1878255762	1691836573	1642462183	1633286157	1394909434	1740159880	1717011428	1667616051
Q02248	Catenin beta-1 OS=Mus musculus OX=10090 GN=Ctnnb1 PE=1 SV=1	21	942189791	7.50391e+08	6.68576e+08	6.97165e+08	818730255	6.63599e+08	6.98093e+08	7.49469e+08	7.14122e+08
Q02257	Junction plakoglobin OS=Mus musculus OX=10090 GN=Jup PE=1 SV=3	20	1355033887	1338889517	6.60133e+08	1269250597	1459042088	1272296940	1229763874	1186084961	1186712440
Q02357	Ankyrin-1 OS=Mus musculus OX=10090 GN=Ank1 PE=1 SV=2	10	1.07184e+08	5.57153e+07	4.80002e+07	54052455	6.15409e+07	42149783	5.89995e+07	46538821	4.99727e+07
Q02780	Nuclear factor 1 A-type OS=Mus musculus OX=10090 GN=Nfia PE=1 SV=1	3	92135449	73264246	74104608	7.51091e+07	7.84228e+07	67543054	75312888	70769234	72642595
Q03137	Ephrin type-A receptor 4 OS=Mus musculus OX=10090 GN=Epha4 PE=1 SV=2	13	159473799	1.43323e+08	1.06475e+08	1.38299e+08	1.0516e+08	1.14221e+08	131784425	1.29585e+08	120547792
Q03141	MAP/microtubule affinity-regulating kinase 3 OS=Mus musculus OX=10090 GN=Mark3 PE=1 SV=2	4	33482709	36422845	10701874	1.83792e+07	1.01663e+07	1.42919e+07	2.17866e+07	2.2759e+07	2.06157e+07
Q03173	Protein enabled homolog OS=Mus musculus OX=10090 GN=Enah PE=1 SV=2	7	9.17561e+07	8.64044e+07	7.52883e+07	5.56167e+07	5.8666e+07	4.58415e+07	6.72213e+07	6.63802e+07	7.97295e+07
Q04447	Creatine kinase B-type OS=Mus musculus OX=10090 GN=Ckb PE=1 SV=1	36	9469730459	8390757457	6295899143	8140898748	8008953431	6311942342	7262657756	7225642914	7266486851
Q04690	Neurofibromin OS=Mus musculus OX=10090 GN=Nf1 PE=1 SV=1	12	1.39354e+08	1.21994e+08	6.96014e+07	1.27505e+08	1.47778e+08	137574245	1.38566e+08	107994414	1.08094e+08
Q04736	Tyrosine-protein kinase Yes OS=Mus musculus OX=10090 GN=Yes1 PE=1 SV=3	1	10368665	8756355	11417062	6411639	6.43653e+06	6802694	7327887	8837823	8.12587e+06
Q05512	Serine/threonine-protein kinase MARK2 OS=Mus musculus OX=10090 GN=Mark2 PE=1 SV=3	8	1.07573e+08	5.68037e+07	4.18136e+07	3.5636e+07	3.94831e+07	2.56279e+07	3.53999e+07	5.24251e+07	4.468e+07
Q05816	Fatty acid-binding protein, epidermal OS=Mus musculus OX=10090 GN=Fabp5 PE=1 SV=3	4	246707615	280022309	6.54418e+07	241126131	305158609	2.04188e+08	2.11851e+08	2.10125e+08	1.97297e+08
Q05920	Pyruvate carboxylase, mitochondrial OS=Mus musculus OX=10090 GN=Pc PE=1 SV=1	297	2810000000000	3710000000000	2870000000000	4480000000000	5220000000000	3830000000000	3720000000000	3710000000000	3750000000000
Q05BC3	Echinoderm microtubule-associated protein-like 1 OS=Mus musculus OX=10090 GN=Eml1 PE=1 SV=1	5	75458558	65543590	3.91014e+07	45850448	45803057	42660237	4.73181e+07	40538122	3.46555e+07
Q05D44	Eukaryotic translation initiation factor 5B OS=Mus musculus OX=10090 GN=Eif5b PE=1 SV=2	1	7681462	6427795		3.58677e+06	5646355	2.72786e+06	4340059	2.62379e+06	4.3418e+06
Q06138	Calcium-binding protein 39 OS=Mus musculus OX=10090 GN=Cab39 PE=1 SV=2	2	22861001	17100102	2994153	9477596	1.55081e+07		1.64673e+07	1.33535e+07	5.57903e+06
Q06335	Amyloid-like protein 2 OS=Mus musculus OX=10090 GN=Aplp2 PE=1 SV=4	1	13427368	12538494	22315956	5481675	6.17573e+06	8196883	9316252	9320605	8421259
Q08274	Dystrophia myotonica WD repeat-containing protein OS=Mus musculus OX=10090 GN=Dmwd PE=1 SV=3	1		6.58215e+06	4.15304e+06	3445618	5.07348e+06	5123189	3.9335e+06		5.81728e+06
Q08331	Calretinin OS=Mus musculus OX=10090 GN=Calb2 PE=1 SV=3	16	6.42483e+08	6.09604e+08	2.67629e+08	277274425	2.7393e+08	1.7747e+08	3.69174e+08	3.4614e+08	3.69454e+08
Q08642	Protein-arginine deiminase type-2 OS=Mus musculus OX=10090 GN=Padi2 PE=1 SV=2	4	32244293	3.06112e+07	2.46441e+07	28212768	2.01823e+07	27935372	23768283	30930824	27826044
Q0GNC1	Inverted formin-2 OS=Mus musculus OX=10090 GN=Inf2 PE=1 SV=1	2	10436122	1.27665e+07	9.15135e+06	4.01006e+06	6.39082e+06	4701268	6.33826e+06	5.55148e+06	5666722
Q0KK55	Kinase non-catalytic C-lobe domain-containing protein 1 OS=Mus musculus OX=10090 GN=Kndc1 PE=1 SV=2	5	6.52948e+07	52361662	3.0088e+07	9.42185e+06		7187799	1.41424e+07	21478202	2.29127e+07
Q0KL01	UBX domain-containing protein 2B OS=Mus musculus OX=10090 GN=Ubxn2b PE=1 SV=2	5	7.90729e+07	39418002	29378474	2636103		1387049	1.09987e+07	13942556	9883730
Q0KL02	Triple functional domain protein OS=Mus musculus OX=10090 GN=Trio PE=1 SV=3	25	3.51664e+08	299207384	259180216	3.2118e+08	2.99747e+08	3.77928e+08	3.29244e+08	322201108	3.11247e+08
Q0VE82	Copine-7 OS=Mus musculus OX=10090 GN=Cpne7 PE=1 SV=1	1	5456169					4664226			3.23413e+06
Q11011	Puromycin-sensitive aminopeptidase OS=Mus musculus OX=10090 GN=Npepps PE=1 SV=2	38	1946278489	1727380456	1485912139	1728461818	1853813534	1491937532	1642872690	1638667387	1583469379
Q11136	Xaa-Pro dipeptidase OS=Mus musculus OX=10090 GN=Pepd PE=1 SV=3	6	2.7871e+08	220895840	110520852	1.27776e+08	1.30568e+08	1.03004e+08	148270595	152311023	1.51658e+08
Q148V7	LisH domain and HEAT repeat-containing protein KIAA1468 OS=Mus musculus OX=10090 GN=Kiaa1468 PE=1 SV=1	8	68251580	4.20078e+07	26739364	1.27428e+07	1.88317e+07	1.25066e+07	2.25223e+07	2.78519e+07	2.86316e+07
Q14BB9	MAP6 domain-containing protein 1 OS=Mus musculus OX=10090 GN=Map6d1 PE=1 SV=1	2	19016807	5.2339e+06	4.20241e+06	11212333	10524444	7800206	16229043	11133583	1.03291e+07
Q14BI2	Metabotropic glutamate receptor 2 OS=Mus musculus OX=10090 GN=Grm2 PE=1 SV=2	3	2.73649e+07	2.33285e+07	9.27236e+06	1.62916e+07	1.59984e+07	1.29824e+07	1.66023e+07	9.52236e+06	21268978
Q14CH0	Protein FAM171B OS=Mus musculus OX=10090 GN=Fam171b PE=1 SV=2	3	4.36454e+07	3.41028e+07	1.02654e+07	7.00295e+06	1.47245e+06	10107444	1.21447e+07	1.22956e+07	8081593
Q1RLL3	Copine-9 OS=Mus musculus OX=10090 GN=Cpne9 PE=1 SV=1	2	147987870	186496284	168005798	236248332	229578165	210296054	184656350	181336658	189929158
Q2M3X8	Phosphatase and actin regulator 1 OS=Mus musculus OX=10090 GN=Phactr1 PE=1 SV=1	12	4.25214e+08	2.95986e+08	2.12725e+08	1.13001e+08	1.2527e+08	8.20563e+07	2.14806e+08	1.96922e+08	1.97915e+08
Q2NL51	Glycogen synthase kinase-3 alpha OS=Mus musculus OX=10090 GN=Gsk3a PE=1 SV=2	5	107457400	8.58868e+07	75372676	61059465	58358112	6.63667e+07	61412616	8.36526e+07	79467246
Q2PFD7	PH and SEC7 domain-containing protein 3 OS=Mus musculus OX=10090 GN=Psd3 PE=1 SV=2	15	5.87054e+08	4.85818e+08	5.2485e+08	3.90099e+08	427188074	3.88454e+08	472992431	4.68073e+08	4.56032e+08
Q2TPA8	Hydroxysteroid dehydrogenase-like protein 2 OS=Mus musculus OX=10090 GN=Hsdl2 PE=1 SV=1	6	56978286	53705299	50744029	41159011	3.05654e+07	3.46126e+07	3.76634e+07	4.32716e+07	4.29056e+07
Q31125	Zinc transporter SLC39A7 OS=Mus musculus OX=10090 GN=Slc39a7 PE=1 SV=2	2	26302197	7862736	1.79893e+07	11135678	8939951	8279960	5.99672e+06	7.54979e+06	9134159
Q3B7Z2	Oxysterol-binding protein 1 OS=Mus musculus OX=10090 GN=Osbp PE=1 SV=3	9	1.21317e+08	8.48057e+07	8.85153e+07	85738503	7.24808e+07	8.75893e+07	92399057	1.02239e+08	1.27641e+08
Q3KNM2	E3 ubiquitin-protein ligase MARCH5 OS=Mus musculus OX=10090 GN=March5 PE=1 SV=1	2	26606204	12262284	14296135	17875122	2.4301e+07	16864310	18936718	14230845	13089431
Q3TC72	Fumarylacetoacetate hydrolase domain-containing protein 2A OS=Mus musculus OX=10090 GN=Fahd2 PE=1 SV=1	6	9.9397e+07	8.46175e+07	7.31334e+07	73795971	8.17642e+07	7.70401e+07	8.06005e+07	76838200	8.19047e+07
Q3TDK6	Protein rogdi homolog OS=Mus musculus OX=10090 GN=Rogdi PE=1 SV=2	5	1.18045e+08	91017387	7.99001e+07	90370907	74942187	66660327	80969870	8.48737e+07	85342501
Q3TDN2	FAS-associated factor 2 OS=Mus musculus OX=10090 GN=Faf2 PE=1 SV=2	2	24745758	28669139	1.40671e+07	28636097	26136545	21111654	18650418	26110155	25123117
Q3TES0	IQ motif and SEC7 domain-containing protein 3 OS=Mus musculus OX=10090 GN=Iqsec3 PE=1 SV=1	4	2.70601e+07	1.15193e+07	2.45243e+07	4.34393e+06	6.94602e+06	4140812	1.47544e+07	1.39348e+07	1.37061e+07
Q3TFQ1	SPRY domain-containing protein 7 OS=Mus musculus OX=10090 GN=Spryd7 PE=1 SV=2	1	9476508	9299791		10343336	7463426	7851549	7.79356e+06	7.37481e+06	9300381
Q3THE2	Myosin regulatory light chain 12B OS=Mus musculus OX=10090 GN=Myl12b PE=1 SV=2	3	3.28325e+07	30230834	1.71959e+07	6.3747e+06	1.24293e+07	13511536	12368854	18919117	1.64971e+07
Q3THK7	GMP synthase [glutamine-hydrolyzing] OS=Mus musculus OX=10090 GN=Gmps PE=1 SV=2	14	2.6813e+08	1.83633e+08	1.52644e+08	2.23051e+08	1.60306e+08	185089885	2.10501e+08	1.89185e+08	1.83766e+08
Q3THS6	S-adenosylmethionine synthase isoform type-2 OS=Mus musculus OX=10090 GN=Mat2a PE=1 SV=2	8	1.12661e+08	107329383	101411072	9.23956e+07	9.83596e+07	9.01416e+07	8.95119e+07	91004606	8.68864e+07
Q3TKT4	Transcription activator BRG1 OS=Mus musculus OX=10090 GN=Smarca4 PE=1 SV=1	3	14781436	8.25645e+06	17613359	10810869	9517928	3.54465e+06	5.49411e+06	8.14271e+06	1.02066e+07
Q3TLH4	Protein PRRC2C OS=Mus musculus OX=10090 GN=Prrc2c PE=1 SV=3	2	8.11765e+06	6.69096e+06			1.52127e+06	675663	2.94617e+06	4.11202e+06	1.55429e+06
Q3TLI0	Trafficking protein particle complex subunit 10 OS=Mus musculus OX=10090 GN=Trappc10 PE=1 SV=2	3	2.55408e+07	2.42675e+07	7.02339e+06	1.41806e+07	21781255	1.84607e+07	1.70757e+07	1.30978e+07	1.37202e+07
Q3TLS3	GDP-D-glucose phosphorylase 1 OS=Mus musculus OX=10090 GN=Gdpgp1 PE=1 SV=2	1	5333793	3.97331e+06	4.24623e+06			3.28213e+06	2.69217e+06	2.72773e+06	4.26303e+06
Q3TMH2	Secernin-3 OS=Mus musculus OX=10090 GN=Scrn3 PE=1 SV=1	5	4.51303e+07	31097390	2.621e+07	113237053	2.92229e+07	2.16211e+07	20328744	25234187	1.93042e+07
Q3TPE9	Ankyrin repeat and MYND domain-containing protein 2 OS=Mus musculus OX=10090 GN=Ankmy2 PE=1 SV=1	2	16227139	2.57213e+06	1.11688e+07	2.57994e+06	8.92729e+06	2.02873e+06	8.4663e+06	10637692	3.4553e+06
Q3TVA9	Coiled-coil domain-containing protein 136 OS=Mus musculus OX=10090 GN=Ccdc136 PE=1 SV=2	2	2.01726e+07	1.47981e+07	1.48367e+06	5.40862e+06	9733233	6.63121e+06	11894131	9.39668e+06	7.46449e+06
Q3TXS7	26S proteasome non-ATPase regulatory subunit 1 OS=Mus musculus OX=10090 GN=Psmd1 PE=1 SV=1	25	4.88755e+08	4.22237e+08	3.73436e+08	368750187	4.3428e+08	3.87842e+08	3.93568e+08	3.66478e+08	453185130
Q3TXX4	Vesicular glutamate transporter 1 OS=Mus musculus OX=10090 GN=Slc17a7 PE=1 SV=2	7	9.26325e+08	680054606	608854500	951805330	970084452	844848478	840721103	904010692	921064672
Q3TY60	Protein FAM131B OS=Mus musculus OX=10090 GN=Fam131b PE=1 SV=1	7	813648504	4.90426e+08	5.06968e+08	4.46261e+07	5.79839e+07	2.06795e+07	2.83574e+08	3.00732e+08	315975745
Q3TYD6	Serine/threonine-protein kinase LMTK2 OS=Mus musculus OX=10090 GN=Lmtk2 PE=1 SV=3	6	140185718	112621582	5.71877e+07	4.12812e+07	3.90648e+07	2.67434e+07	6.99548e+07	7.05537e+07	6.07003e+07
Q3U0M1	Trafficking protein particle complex subunit 9 OS=Mus musculus OX=10090 GN=Trappc9 PE=1 SV=2	7	4.59815e+07	4.6132e+07	49477496	5.18336e+07	40401092	4.38039e+07	36961006	46801197	53598473
Q3U0V1	Far upstream element-binding protein 2 OS=Mus musculus OX=10090 GN=Khsrp PE=1 SV=2	18	3.06627e+08	3.34447e+08	1.85191e+08	2.64645e+08	2.83262e+08	228135433	2.31596e+08	2.52791e+08	2.33046e+08
Q3U1J4	DNA damage-binding protein 1 OS=Mus musculus OX=10090 GN=Ddb1 PE=1 SV=2	23	528952286	432732687	334774373	414403808	480249732	4.2464e+08	4.13155e+08	4.45065e+08	4.6029e+08
Q3U2P1	Protein transport protein Sec24A OS=Mus musculus OX=10090 GN=Sec24a PE=1 SV=1	2	14941324	1.29676e+07	7.19942e+06	8.99053e+06	1.32723e+07	1.47847e+07	15676457	11873579	1.31028e+07
Q3U487	E3 ubiquitin-protein ligase HECTD3 OS=Mus musculus OX=10090 GN=Hectd3 PE=1 SV=2	1	23061390	28246580	21453850	53316824	39151520	27818320	30230126	32605318	44332408
Q3UDE2	Tubulin--tyrosine ligase-like protein 12 OS=Mus musculus OX=10090 GN=Ttll12 PE=1 SV=1	4	3.80409e+07	28771959	3.63505e+07	1.65362e+07	18394622	1.87651e+07	21461460	2.5666e+07	3.00708e+07
Q3UE37	Ubiquitin-conjugating enzyme E2 Z OS=Mus musculus OX=10090 GN=Ube2z PE=1 SV=2	2	44939596	33898857	21747581	11418500	2.28581e+07	5.4834e+07	1.13135e+07	1.1021e+07	8.08696e+06
Q3UEB3	Poly(U)-binding-splicing factor PUF60 OS=Mus musculus OX=10090 GN=Puf60 PE=1 SV=2	3	42784430	3.14927e+07	2.60255e+07	18307849	1.49243e+07	23960995	21600070	2.85956e+07	31932876
Q3UFS0	Protein zyg-11 homolog B OS=Mus musculus OX=10090 GN=Zyg11b PE=1 SV=2	1	7.04268e+06	6163877	5.28942e+06	7225724	4405521	4941437	4.80342e+06	3.86562e+06	5.96351e+06
Q3UGR5	Haloacid dehalogenase-like hydrolase domain-containing protein 2 OS=Mus musculus OX=10090 GN=Hdhd2 PE=1 SV=2	5	1.20056e+08	9.99913e+07	85343799	115633650	120417066	9.20709e+07	8.61578e+07	97135275	9.64254e+07
Q3UGY8	Brefeldin A-inhibited guanine nucleotide-exchange protein 3 OS=Mus musculus OX=10090 GN=Arfgef3 PE=1 SV=1	7	4.35919e+07	3.55491e+07	27058428	3.75834e+07	3.89052e+07	34996286	3.75941e+07	44511268	39932407
Q3UH60	Disco-interacting protein 2 homolog B OS=Mus musculus OX=10090 GN=Dip2b PE=1 SV=1	15	146548227	147645138	1.40611e+08	1.26448e+08	1.50585e+08	130868598	1.23681e+08	1.36577e+08	1.16738e+08
Q3UH93	Plexin-D1 OS=Mus musculus OX=10090 GN=Plxnd1 PE=1 SV=1	1	3.98849e+06	2.25729e+06		8469626	5.57677e+06	5.51869e+06	10653736	10834854	14415228
Q3UH99	Protein shisa-6 OS=Mus musculus OX=10090 GN=Shisa6 PE=1 SV=1	2	24435496	15179173	13932252	5.93726e+06	4.0304e+06	4.02928e+06	1.29255e+07	6256301	10399029
Q3UHC7	Disabled homolog 2-interacting protein OS=Mus musculus OX=10090 GN=Dab2ip PE=1 SV=1	7	8.32933e+07	7.58691e+07	4.04146e+07	2.23933e+07	2.65178e+07	2.91724e+07	47813286	4.79767e+07	54357382
Q3UHD2	Glucose-fructose oxidoreductase domain-containing protein 1 OS=Mus musculus OX=10090 GN=Gfod1 PE=1 SV=1	1	8891929	7.43013e+06	5596042	6460121	10784813	6.40066e+06	7.24619e+06	7960757	6861781
Q3UHD6	Sorting nexin-27 OS=Mus musculus OX=10090 GN=Snx27 PE=1 SV=2	15	280466845	2.45126e+08	1.98614e+08	2.14675e+08	2.09347e+08	2.20298e+08	2.09961e+08	2.40005e+08	238075268
Q3UHD9	Arf-GAP with GTPase, ANK repeat and PH domain-containing protein 2 OS=Mus musculus OX=10090 GN=Agap2 PE=1 SV=1	17	722966265	8.11133e+08	7.86394e+08	6.28089e+08	860536985	779172307	7.8421e+08	8.06438e+08	573799855
Q3UHE1	Membrane-associated phosphatidylinositol transfer protein 3 OS=Mus musculus OX=10090 GN=Pitpnm3 PE=1 SV=2	3	33721115	1.54927e+07	19238336	7140132	5.973e+06	5.23895e+06	1.59642e+07	1.33279e+07	1.14656e+07
Q3UHJ0	AP2-associated protein kinase 1 OS=Mus musculus OX=10090 GN=Aak1 PE=1 SV=2	36	2027197601	1481852540	8.21761e+08	6.22912e+08	6.46747e+08	5.43095e+08	9.81821e+08	9.58562e+08	9.36656e+08
Q3UHK1	Proton myo-inositol cotransporter OS=Mus musculus OX=10090 GN=Slc2a13 PE=1 SV=2	4	29387603	27482290	1.7586e+07	2.18668e+07	2.76288e+07	2.61291e+07	31115766	2.81637e+07	3.18077e+07
Q3UHK6	Teneurin-4 OS=Mus musculus OX=10090 GN=Tenm4 PE=1 SV=2	6	2.9966e+07	3.88216e+07	3.55278e+07	2.29715e+07	2.33699e+07	35413135	28168232	3.816e+07	2.37428e+07
Q3UHL1	CaM kinase-like vesicle-associated protein OS=Mus musculus OX=10090 GN=Camkv PE=1 SV=2	22	1416712207	1107394934	693736978	8.91927e+08	9.39766e+08	8.8215e+08	8.75119e+08	9.26826e+08	9.44017e+08
Q3UHX2	28 kDa heat- and acid-stable phosphoprotein OS=Mus musculus OX=10090 GN=Pdap1 PE=1 SV=1	8	179522480	1.10051e+08	4.35699e+07	6.30023e+06	2.47126e+06	5.76574e+06	5.42982e+07	5.76349e+07	4.77172e+07
Q3UJB9	Enhancer of mRNA-decapping protein 4 OS=Mus musculus OX=10090 GN=Edc4 PE=1 SV=2	15	191884220	1.39058e+08	1.20149e+08	4.6974e+07	6.18398e+07	4.93707e+07	95322191	9.82628e+07	1.04892e+08
Q3UJP5	Protein C8orf37 homolog OS=Mus musculus OX=10090 PE=1 SV=1	1	10191019		6.10905e+06			10217821			9291720
Q3UKJ7	WD40 repeat-containing protein SMU1 OS=Mus musculus OX=10090 GN=Smu1 PE=2 SV=2	4	3.20292e+07	3.59551e+07	31785157	23109963	3.14481e+07	28931547	3.70642e+07	32924021	2.82835e+07
Q3ULD5	Methylcrotonoyl-CoA carboxylase beta chain, mitochondrial OS=Mus musculus OX=10090 GN=Mccc2 PE=1 SV=1	7	8.42247e+07	8.93593e+07	54374198	7.62424e+07	8.98461e+07	71825953	6.81652e+07	8.07587e+07	7.43586e+07
Q3ULJ0	Glycerol-3-phosphate dehydrogenase 1-like protein OS=Mus musculus OX=10090 GN=Gpd1l PE=1 SV=2	9	297875745	249435894	1.83614e+08	2.32125e+08	264352761	204682175	2.38364e+08	236410509	2.34806e+08
Q3UMB9	WASH complex subunit 4 OS=Mus musculus OX=10090 GN=Washc4 PE=1 SV=2	31	1020033893	9.63843e+08	589043915	3.5851e+07	3.67713e+07	2.66156e+07	3.7983e+08	3.99622e+08	3.94327e+08
Q3UMY5	Echinoderm microtubule-associated protein-like 4 OS=Mus musculus OX=10090 GN=Eml4 PE=1 SV=1	1	10449905	13261157		6009368		6217043	6.21801e+06	5.67607e+06	10431049
Q3UN04	Ubiquitin carboxyl-terminal hydrolase 30 OS=Mus musculus OX=10090 GN=Usp30 PE=1 SV=1	3	6209444	7465793	7.01208e+06	4.95052e+06	2.46895e+06	8.65225e+06	7170817	6.47562e+06	2.44662e+06
Q3UNH4	G protein-regulated inducer of neurite outgrowth 1 OS=Mus musculus OX=10090 GN=Gprin1 PE=1 SV=2	58	5274093197	3344959357	1297137019	6.85631e+08	7.21344e+08	5.11233e+08	1794856488	1876893855	1882052038
Q3UPL0	Protein transport protein Sec31A OS=Mus musculus OX=10090 GN=Sec31a PE=1 SV=2	17	279335842	1.86547e+08	1.95285e+08	1.95618e+08	1.72472e+08	1.63748e+08	194819671	1.92588e+08	1.92678e+08
Q3UR70	Transforming growth factor-beta receptor-associated protein 1 OS=Mus musculus OX=10090 GN=Tgfbrap1 PE=1 SV=1	2	1.05346e+07	12706357	10614617	4.1207e+06		4.10432e+06	7.61022e+06	1.61021e+07	10964953
Q3URD3	Sarcolemmal membrane-associated protein OS=Mus musculus OX=10090 GN=Slmap PE=1 SV=2	3	15406536	7.96688e+06		1.0153e+07	1.17747e+07	11330013	8.9195e+06	9.37778e+06	1.53229e+07
Q3USB7	Inactive phospholipase C-like protein 1 OS=Mus musculus OX=10090 GN=Plcl1 PE=1 SV=3	1	7186740	6.9547e+06	3.16828e+06		6.55593e+06		4.31695e+06	6474381	4965834
Q3UTH8	Rho guanine nucleotide exchange factor 9 OS=Mus musculus OX=10090 GN=Arhgef9 PE=1 SV=1	3	1.56092e+07	8.08023e+06	1.8298e+06	6.98069e+06	3.07039e+06	5.57781e+06	3.33794e+06	2241544	765834
Q3UTJ2	Sorbin and SH3 domain-containing protein 2 OS=Mus musculus OX=10090 GN=Sorbs2 PE=1 SV=2	27	7.44977e+08	490732680	401270999	1.96783e+08	1.84263e+08	1.64145e+08	3.36366e+08	298212890	3.28726e+08
Q3UTQ8	Cyclin-dependent kinase-like 5 OS=Mus musculus OX=10090 GN=Cdkl5 PE=1 SV=1	11	1.75662e+08	1.41694e+08	8.67556e+07	1.75632e+07	8641739	9.42731e+06	6.74088e+07	6.6485e+07	5.99698e+07
Q3UTZ3	Uncharacterized protein C7orf43 homolog OS=Mus musculus OX=10090 PE=1 SV=1	2	1.10614e+07	31169672	3.02714e+07	2.54338e+07	3.1282e+07	2.92739e+07	3.0017e+07	31455925	2.90862e+07
Q3UU96	Serine/threonine-protein kinase MRCK alpha OS=Mus musculus OX=10090 GN=Cdc42bpa PE=1 SV=2	11	8.32722e+07	3.82452e+07	68085081	5.84903e+07	7.1489e+07	5.35942e+07	48625408	4.86636e+07	5.17258e+07
Q3UUF8	Ankyrin repeat domain-containing protein 34B OS=Mus musculus OX=10090 GN=Ankrd34b PE=1 SV=1	1	7097832	3177943	4622959
Q3UUG6	TBC1 domain family member 24 OS=Mus musculus OX=10090 GN=Tbc1d24 PE=1 SV=2	11	2.29174e+08	2.4943e+08	2.00871e+08	244795903	265945973	2.11061e+08	2.4033e+08	2.44866e+08	2.61962e+08
Q3UUQ7	GPI inositol-deacylase OS=Mus musculus OX=10090 GN=Pgap1 PE=1 SV=3	1	8817601	7724833	6212919	6.77358e+06	6.52647e+06	6809858	7843622	4850104	6138563
Q3UV70	[Pyruvate dehydrogenase [acetyl-transferring]]-phosphatase 1, mitochondrial OS=Mus musculus OX=10090 GN=Pdp1 PE=1 SV=1	3	1.83193e+07	19131960	5.23637e+06	1.38505e+07	1.47502e+07	1.99984e+07	1.83649e+07	6.6791e+06	8.56683e+06
Q3UVK0	Endoplasmic reticulum metallopeptidase 1 OS=Mus musculus OX=10090 GN=Ermp1 PE=1 SV=2	1	4.75859e+06	6.94944e+06	2.52653e+06	6547384	6087581	4.84338e+06	4.70173e+06	5213127	5402980
Q3UVL4	Vacuolar protein sorting-associated protein 51 homolog OS=Mus musculus OX=10090 GN=Vps51 PE=1 SV=2	17	5.20382e+08	3.42117e+08	2.58381e+08	8.97363e+07	1.03658e+08	7.95588e+07	2.08905e+08	2.12947e+08	206087523
Q3UVX5	Metabotropic glutamate receptor 5 OS=Mus musculus OX=10090 GN=Grm5 PE=1 SV=2	10	1.59681e+08	169712366	1.32229e+08	126969097	145996522	1.33749e+08	1.36583e+08	1.428e+08	142215286
Q3UX10	Tubulin alpha chain-like 3 OS=Mus musculus OX=10090 GN=Tubal3 PE=2 SV=2	2	46057842	33192813	23022248	71106584	55307553	41938880	55384244	46095911	40551084
Q3UYC0	Protein phosphatase 1H OS=Mus musculus OX=10090 GN=Ppm1h PE=1 SV=1	3	2.5587e+07	2.65884e+07	3.06944e+07	2.29585e+07	28887820	2.2164e+07	20896710	22678512	2.87842e+07
Q3V1L4	Cytosolic purine 5'-nucleotidase OS=Mus musculus OX=10090 GN=Nt5c2 PE=1 SV=2	3	21613653	14450173	3.82546e+06	14463206	1.31556e+07	9.66146e+06	9.16079e+06	1.09191e+07	1.373e+07
Q3V3Q7	Phosphofurin acidic cluster sorting protein 2 OS=Mus musculus OX=10090 GN=Pacs2 PE=1 SV=2	3	2.38756e+07	18238462	13951968	2.08368e+07	1.96903e+07	1.51192e+07	1.62942e+07	21214901	8176035
Q499X9	Methionine--tRNA ligase, mitochondrial OS=Mus musculus OX=10090 GN=Mars2 PE=1 SV=2	1	9732383	7309282					5.25174e+06	4168665	6088284
Q4ACU6	SH3 and multiple ankyrin repeat domains protein 3 OS=Mus musculus OX=10090 GN=Shank3 PE=1 SV=3	21	3.07685e+08	1.39033e+08	1.1757e+08	2.1636e+07	1.36123e+07	1.89487e+07	88670186	1.0276e+08	9.42291e+07
Q4JIM5	Abelson tyrosine-protein kinase 2 OS=Mus musculus OX=10090 GN=Abl2 PE=1 SV=1	2	9.3587e+06	1.18203e+07	1.85868e+07	1.0511e+07	11327030	8027427	9.82323e+06	9635011	8.35512e+06
Q4KUS2	Protein unc-13 homolog A OS=Mus musculus OX=10090 GN=Unc13a PE=1 SV=3	19	2.26149e+08	2.22657e+08	209845493	210578707	1.9445e+08	164505019	192243941	2.071e+08	2.1591e+08
Q4V9Z5	Seizure 6-like protein 2 OS=Mus musculus OX=10090 GN=Sez6l2 PE=1 SV=1	5	5.70398e+07	30417600	2.39912e+07	4.40885e+07	6.36595e+07	34788447	4.16747e+07	3.66256e+07	33756712
Q4VAA2	Protein CDV3 OS=Mus musculus OX=10090 GN=Cdv3 PE=1 SV=2	4	95541589	54204903	39920723				1.87142e+07	1.57388e+07	1.35623e+07
Q4VBD2	Transmembrane anterior posterior transformation protein 1 OS=Mus musculus OX=10090 GN=Tapt1 PE=1 SV=2	2		11869524	1.24581e+07	108984501	107023570	98977442	93471812	100164211	12540710
Q501J6	Probable ATP-dependent RNA helicase DDX17 OS=Mus musculus OX=10090 GN=Ddx17 PE=1 SV=1	8	107792042	89519120	94600092	52976927	4.9128e+07	94784177	75741909	1.12299e+08	1.22088e+08
Q505F5	Leucine-rich repeat-containing protein 47 OS=Mus musculus OX=10090 GN=Lrrc47 PE=1 SV=1	2	14574208	14643546	4391279	1.45893e+07	13567452	1.11906e+07	5.44901e+06	13316037	1.39541e+07
Q50H33	BTB/POZ domain-containing protein KCTD8 OS=Mus musculus OX=10090 GN=Kctd8 PE=1 SV=1	2	19037367	2.70065e+07	18079920	11234796	10281044	10099078	2.23377e+07	2.05842e+07	2.64894e+07
Q52KF3	Protein spire homolog 1 OS=Mus musculus OX=10090 GN=Spire1 PE=1 SV=1	1	3.78967e+06	3.22892e+06	2.97351e+06	1.26812e+06	1.20315e+06	2.1967e+06	2.79258e+06	1.75944e+06	2.76468e+06
Q56A07	Sodium channel subunit beta-2 OS=Mus musculus OX=10090 GN=Scn2b PE=1 SV=1	2	43338398	39300001	1.72335e+07	36929591	33301137	34285130	31810580	34452720	39312443
Q58A65	C-Jun-amino-terminal kinase-interacting protein 4 OS=Mus musculus OX=10090 GN=Spag9 PE=1 SV=2	1	91574856	34512688	55647572	88864192	106160280	102802992	63828292	70585688	65139592
Q5DQR4	Syntaxin-binding protein 5-like OS=Mus musculus OX=10090 GN=Stxbp5l PE=1 SV=1	8	102801479	7.45975e+07	5.80896e+07	7.80563e+07	74510619	75491875	9.70855e+07	9.85897e+07	1.06627e+08
Q5DTL9	Sodium-driven chloride bicarbonate exchanger OS=Mus musculus OX=10090 GN=Slc4a10 PE=1 SV=2	1	9268982	3.89482e+06	12052804	4.0759e+06	13377529	7.57271e+06	3.17401e+06
Q5DTX6	Junctional protein associated with coronary artery disease OS=Mus musculus OX=10090 GN=Jcad PE=1 SV=2	2	25324500	15253529					5.59359e+06	3560068	4786253
Q5DTY9	BTB/POZ domain-containing protein KCTD16 OS=Mus musculus OX=10090 GN=Kctd16 PE=1 SV=2	7	2724169244	907939269	1485315155	3564561509	2889144710	4038762052	2315086412	2755122616	2727997019
Q5DU25	IQ motif and SEC7 domain-containing protein 2 OS=Mus musculus OX=10090 GN=Iqsec2 PE=1 SV=3	2	5.64272e+06	4.0097e+06	10558524	3.3375e+06	3.70956e+06	4.83564e+06	4567760	3824597	5.31558e+06
Q5EG47	5'-AMP-activated protein kinase catalytic subunit alpha-1 OS=Mus musculus OX=10090 GN=Prkaa1 PE=1 SV=2	2	83628039	7.0831e+07	21497505	90156264	86121471	71918503	8.31755e+07	72331360	76679351
Q5F2E7	Nuclear fragile X mental retardation-interacting protein 2 OS=Mus musculus OX=10090 GN=Nufip2 PE=1 SV=1	2	28166343	27555279	3.54093e+06				1.23318e+07	1.17203e+07	3.11108e+06
Q5F2E8	Serine/threonine-protein kinase TAO1 OS=Mus musculus OX=10090 GN=Taok1 PE=1 SV=1	1	8088380	6043563	4602826	4.32672e+06	5.57875e+06			6.04513e+06
Q5FW52	Muscular LMNA-interacting protein OS=Mus musculus OX=10090 GN=Mlip PE=1 SV=1	3	8.62889e+07	52786559	23619182	6.50454e+06			2.52144e+07	30343480	28242220
Q5FWH7	Zinc transporter ZIP12 OS=Mus musculus OX=10090 GN=Slc39a12 PE=1 SV=1	3	2.12259e+07	2.13658e+07	6.67279e+06	1.51939e+07	2.06108e+07	2.09627e+07	1.66529e+07	1.79313e+07	1.81896e+07
Q5FWK3	Rho GTPase-activating protein 1 OS=Mus musculus OX=10090 GN=Arhgap1 PE=1 SV=1	12	2.29777e+08	183120911	103123158	1.00434e+08	1.1316e+08	6.41074e+07	158768133	9.66513e+07	1.1909e+08
Q5H8C4	Vacuolar protein sorting-associated protein 13A OS=Mus musculus OX=10090 GN=Vps13a PE=1 SV=1	2	6713204	3.94767e+06	2.78598e+06	6502965	8.05586e+06	6.00473e+06	3.73776e+06	6.37814e+06	7.51171e+06
Q5HZI2	C2 calcium-dependent domain-containing protein 4C OS=Mus musculus OX=10090 GN=C2cd4cC2CD4 family PE=1 SV=1	3	27906335	2.9693e+07	1.7209e+07	6.80906e+06	2791267		9453199	1.836e+07	2.20196e+07
Q5IRJ6	Zinc transporter 9 OS=Mus musculus OX=10090 GN=Slc30a9 PE=1 SV=2	2	53908484	2.14528e+07		22512590	16511045	2.64492e+07		3.01458e+07	28381485
Q5KU39	Vacuolar protein sorting-associated protein 41 homolog OS=Mus musculus OX=10090 GN=Vps41 PE=1 SV=1	2	24496877	2.20447e+07	1.3556e+07	19852980	2.39733e+07	2.23611e+07	2.05632e+07	2.01112e+07	2.24315e+07
Q5M8N0	CB1 cannabinoid receptor-interacting protein 1 OS=Mus musculus OX=10090 GN=Cnrip1 PE=1 SV=1	9	450228239	5.34398e+08	4.71063e+08	446310836	458923546	4.92303e+08	340889994	3.56238e+08	3.70975e+08
Q5PR73	GTP-binding protein Di-Ras2 OS=Mus musculus OX=10090 GN=Diras2 PE=1 SV=1	5	226324752	1.91721e+08	132160742	1.86991e+08	217652328	166769463	182781428	1.7864e+08	1.89193e+08
Q5QNQ6	Oxysterol-binding protein 2 OS=Mus musculus OX=10090 GN=Osbp2 PE=1 SV=1	1	4579381	7007066	4.09779e+06	4.06987e+06	4.3877e+06	3715789	4.34096e+06	3.78337e+06	4516730
Q5RJI5	Serine/threonine-protein kinase BRSK1 OS=Mus musculus OX=10090 GN=Brsk1 PE=1 SV=1	7	164114622	1.13986e+08	9.82036e+07	9.17055e+07	117102375	7.66168e+07	1.54793e+08	1.31039e+08	105804202
Q5SNZ0	Girdin OS=Mus musculus OX=10090 GN=Ccdc88a PE=1 SV=2	1	6629910						3.86705e+06
Q5SP85	Coiled-coil domain-containing protein 85A OS=Mus musculus OX=10090 GN=Ccdc85a PE=1 SV=1	1	8041676	5627042	2.4119e+06				3316854		3.52287e+06
Q5SQX6	Cytoplasmic FMR1-interacting protein 2 OS=Mus musculus OX=10090 GN=Cyfip2 PE=1 SV=2	50	2634789350	2199064160	2060250654	1958828708	2126386153	1924359271	2162454527	2121018782	2049356431
Q5SRX1	TOM1-like protein 2 OS=Mus musculus OX=10090 GN=Tom1l2 PE=1 SV=1	5	124022289	117818140	9.08031e+07	29392200	30819954	26481725	9.67459e+07	9.85349e+07	8.70195e+07
Q5SSL4	Active breakpoint cluster region-related protein OS=Mus musculus OX=10090 GN=Abr PE=1 SV=1	20	628183681	6.04956e+08	4.89073e+08	6.28121e+08	6.3483e+08	541924242	5.85103e+08	592214206	584926076
Q5SSM3	Rho GTPase-activating protein 44 OS=Mus musculus OX=10090 GN=Arhgap44 PE=1 SV=1	7	138475165	1.36328e+08	9.60509e+07	8.30319e+07	7.52764e+07	64156010	1.289e+08	1.25767e+08	130957763
Q5SSW2	Proteasome activator complex subunit 4 OS=Mus musculus OX=10090 GN=Psme4 PE=1 SV=1	1	16845536		3.55264e+06			9766708	4.43832e+06	5710337	5.64033e+06
Q5SSZ5	Tensin-3 OS=Mus musculus OX=10090 GN=Tns3 PE=1 SV=1	3	21156178	3.05575e+07	22832826	27032651	1.77361e+07	4204704	32897769	32201893	1.5013e+07
Q5SUR0	Phosphoribosylformylglycinamidine synthase OS=Mus musculus OX=10090 GN=Pfas PE=1 SV=1	8	6.83662e+07	36766712	3.31539e+07	65811688	4.15992e+07	4.18048e+07	53862635	52532201	4.57302e+07
Q5SV85	Synergin gamma OS=Mus musculus OX=10090 GN=Synrg PE=1 SV=1	9	1.70877e+08	1.42605e+08	5.88607e+07	1.27114e+07		6.67395e+06	43430377	5.19828e+07	4.79693e+07
Q5SVL6	Rap1 GTPase-activating protein 2 OS=Mus musculus OX=10090 GN=Rap1gap2 PE=1 SV=1	8	1.41615e+08	98457623	6.32123e+07	3.80297e+07	3.26294e+07	1.5373e+07	5.79823e+07	7.04609e+07	6.00096e+07
Q5SW19	Clustered mitochondria protein homolog OS=Mus musculus OX=10090 GN=Cluh PE=1 SV=2	8	162778922	6.31096e+07	9.49909e+07	1.35507e+08	186832850	128596835	148797536	189086908	1.72333e+08
Q5SYD0	Unconventional myosin-Id OS=Mus musculus OX=10090 GN=Myo1d PE=1 SV=1	2	3902114	2.71284e+06		47570316	36006763	5.41918e+07	5285184
Q5U3K5	Rab-like protein 6 OS=Mus musculus OX=10090 GN=Rabl6 PE=1 SV=2	3	3.72184e+07	3.01685e+07	12175844	3.47309e+07	30465179	24552329	20740411	2.83035e+07	2.6357e+07
Q5XJY5	Coatomer subunit delta OS=Mus musculus OX=10090 GN=Arcn1 PE=1 SV=2	18	4.06622e+08	321708260	2.95726e+08	3.47856e+08	441786123	2.58599e+08	4.48501e+08	3.15408e+08	3.45679e+08
Q5XKN4	Protein jagunal homolog 1 OS=Mus musculus OX=10090 GN=Jagn1 PE=1 SV=2	1	1.66632e+06	4.39274e+06	2.69086e+06	6.14869e+06	6.50115e+06	3.71725e+06	5.33988e+06	4.32409e+06	5.99753e+06
Q60598	Src substrate cortactin OS=Mus musculus OX=10090 GN=Cttn PE=1 SV=2	66	21540109175	16063037437	9159224791	1123778964	1042949561	8.73111e+08	7252132836	7468723007	7606731953
Q60605	Myosin light polypeptide 6 OS=Mus musculus OX=10090 GN=Myl6 PE=1 SV=3	5	100895549	126424346	5.5304e+07	72943724	88287312	67911384	8.9741e+07	89803538	86537241
Q60625	Intercellular adhesion molecule 5 OS=Mus musculus OX=10090 GN=Icam5 PE=1 SV=2	6	197949992	185096261	177415719	195802930	200349844	175169975	169970980	175856921	167053403
Q60631	Growth factor receptor-bound protein 2 OS=Mus musculus OX=10090 GN=Grb2 PE=1 SV=1	9	198388563	1.2953e+08	8.69604e+07	9.3655e+07	9.11425e+07	80400266	1.0876e+08	1.05993e+08	1.07302e+08
Q60634	Flotillin-2 OS=Mus musculus OX=10090 GN=Flot2 PE=1 SV=2	2	39596288	34647956	5.89739e+06	27238870	35829216	2.08725e+07	22605278	23185611	26116608
Q60668	Heterogeneous nuclear ribonucleoprotein D0 OS=Mus musculus OX=10090 GN=Hnrnpd PE=1 SV=2	13	521516740	527044990	2.13614e+08	3.91381e+08	4.78101e+08	3.65312e+08	379949911	3.99337e+08	4.2888e+08
Q60676	Serine/threonine-protein phosphatase 5 OS=Mus musculus OX=10090 GN=Ppp5c PE=1 SV=3	11	4.18874e+08	5.13064e+08	1.66354e+08	4.63543e+08	267038897	1.93939e+08	190986371	2.77532e+08	2.11503e+08
Q60692	Proteasome subunit beta type-6 OS=Mus musculus OX=10090 GN=Psmb6 PE=1 SV=3	6	255737744	255156982	239389140	299993114	256234730	286518828	226368855	228387396	238657232
Q60714	Long-chain fatty acid transport protein 1 OS=Mus musculus OX=10090 GN=Slc27a1 PE=1 SV=1	6	64381461	42486900	6.08174e+07	3.83339e+07	6.93333e+07	52545265	6.22345e+07	6.57545e+07	5.03955e+07
Q60737	Casein kinase II subunit alpha OS=Mus musculus OX=10090 GN=Csnk2a1 PE=1 SV=2	3	49202947	3.39952e+07	37762851	27444622	3.20988e+07	2.68285e+07	34188555	3.50042e+07	3.48189e+07
Q60749	KH domain-containing, RNA-binding, signal transduction-associated protein 1 OS=Mus musculus OX=10090 GN=Khdrbs1 PE=1 SV=2	7	91776588	6.63647e+07	6.87346e+07	6.09988e+07	6.25983e+07	42070059	5.93452e+07	6.67107e+07	5.67734e+07
Q60759	Glutaryl-CoA dehydrogenase, mitochondrial OS=Mus musculus OX=10090 GN=Gcdh PE=1 SV=2	9	229281947	242869264	1.51994e+08	5.36276e+07	5.56442e+07	8.4404e+07	119167819	1.32498e+08	142128120
Q60771	Claudin-11 OS=Mus musculus OX=10090 GN=Cldn11 PE=1 SV=1	2	334342733	259978599	166467678	286579936	284981234	301124704	282783377	264793156	264639616
Q60780	Growth arrest-specific protein 7 OS=Mus musculus OX=10090 GN=Gas7 PE=1 SV=1	5	4.63159e+07	57849439	2.73047e+07	3.55799e+07	38222975	3.41915e+07	43951094	4.74646e+07	4.17518e+07
Q60790	Ras GTPase-activating protein 3 OS=Mus musculus OX=10090 GN=Rasa3 PE=1 SV=2	4	21958184	30500763	8.60006e+06	2.43064e+07	23302986	22149038	24323327	22174786	17681166
Q60803	TNF receptor-associated factor 3 OS=Mus musculus OX=10090 GN=Traf3 PE=1 SV=2	1	18890442	33454568	13629713	16655275	38512072	31796244	23754392	23379364	24912814
Q60823	RAC-beta serine/threonine-protein kinase OS=Mus musculus OX=10090 GN=Akt2 PE=1 SV=1	2	1.65231e+07	16139660	10314602	12091507	14268104	1.00807e+07	1.30179e+07	12996678	13205244
Q60829	Protein phosphatase 1 regulatory subunit 1B OS=Mus musculus OX=10090 GN=Ppp1r1b PE=1 SV=2	8	370044314	5.45277e+08	2.57967e+08	214316995	258677794	1.95883e+08	2.86084e+08	285120422	2.74518e+08
Q60854	Serpin B6 OS=Mus musculus OX=10090 GN=Serpinb6 PE=1 SV=1	7	1.30746e+08	1.25402e+08	8.33795e+07	104904873	125270826	109867045	98450504	1.10145e+08	1.18817e+08
Q60864	Stress-induced-phosphoprotein 1 OS=Mus musculus OX=10090 GN=Stip1 PE=1 SV=1	18	573964579	4.00588e+08	1.59973e+08	2.03468e+08	184787384	128065373	271836177	2.88774e+08	300305141
Q60865	Caprin-1 OS=Mus musculus OX=10090 GN=Caprin1 PE=1 SV=2	4	8.9815e+07	74924323	2.66187e+07	1.51455e+07	36760842	2.307e+07	2.53942e+06	4.5006e+07	3.5571e+07
Q60870	Receptor expression-enhancing protein 5 OS=Mus musculus OX=10090 GN=Reep5 PE=1 SV=1	2	33183957	32158495	3.31603e+07	1.86182e+07	2.02865e+07	1.66035e+07	30037069	2.68495e+07	23932614
Q60875	Rho guanine nucleotide exchange factor 2 OS=Mus musculus OX=10090 GN=Arhgef2 PE=1 SV=4	18	2.95279e+08	2.12801e+08	1.74584e+08	2.1274e+08	207257401	198941161	1.93272e+08	2.18695e+08	1.90604e+08
Q60899	ELAV-like protein 2 OS=Mus musculus OX=10090 GN=Elavl2 PE=2 SV=1	1	17946946	11844112	13368580		8996204	7.99165e+06	7.83992e+06	9349992
Q60900	ELAV-like protein 3 OS=Mus musculus OX=10090 GN=Elavl3 PE=1 SV=1	3	6.53643e+07	5.15204e+07	5.15419e+07	5.46842e+07	6.81589e+07	4.4895e+07	5.30892e+07	5.79957e+07	52647265
Q60902	Epidermal growth factor receptor substrate 15-like 1 OS=Mus musculus OX=10090 GN=Eps15l1 PE=1 SV=3	18	426439992	3.11926e+08	175627954	8.80066e+07	57236794	1.45263e+08	1.79341e+08	1.31265e+08	159540371
Q60931	Voltage-dependent anion-selective channel protein 3 OS=Mus musculus OX=10090 GN=Vdac3 PE=1 SV=1	4	49567562	5.21901e+07	32524012	4.93625e+07	60020976	5.99635e+07	4.76683e+07	56120390	4.9427e+07
Q60960	Importin subunit alpha-5 OS=Mus musculus OX=10090 GN=Kpna1 PE=1 SV=2	1	7000761	5.51738e+06	3.79158e+06	5.68701e+06	7.36164e+06	3.92764e+06	3.84575e+06	4749307	3.08886e+06
Q60967	Bifunctional 3'-phosphoadenosine 5'-phosphosulfate synthase 1 OS=Mus musculus OX=10090 GN=Papss1 PE=1 SV=1	6	7.7252e+07	7.00912e+07	49178608	5.5069e+07	37562783	62393490	76987267	65964816	7.02675e+07
Q60972	Histone-binding protein RBBP4 OS=Mus musculus OX=10090 GN=Rbbp4 PE=1 SV=5	1	37045192	37699416	31298172	29786474	11226051	31709526	33980784	28149422	31320810
Q60973	Histone-binding protein RBBP7 OS=Mus musculus OX=10090 GN=Rbbp7 PE=1 SV=1	6	1.05618e+08	98976680	4.19138e+07	87271281	9.65435e+07	89410184	82690397	86048723	8.32925e+07
Q60996	Serine/threonine-protein phosphatase 2A 56 kDa regulatory subunit gamma isoform OS=Mus musculus OX=10090 GN=Ppp2r5c PE=1 SV=2	6	139331991	9.30653e+07	8.36379e+07	3.36269e+07	3.63008e+07	2.61448e+07	6.05519e+07	7.94574e+07	7.12214e+07
Q61024	Asparagine synthetase [glutamine-hydrolyzing] OS=Mus musculus OX=10090 GN=Asns PE=1 SV=3	9	1.07922e+08	9.70925e+07	9.31865e+07	9.13492e+07	104939259	7.3968e+07	8.67522e+07	9.11286e+07	8.37104e+07
Q61029	Lamina-associated polypeptide 2, isoforms beta/delta/epsilon/gamma OS=Mus musculus OX=10090 GN=Tmpo PE=1 SV=4	2	11167590	1.07831e+07	6.49095e+06	8306884	1.05405e+07	6.36369e+06	9.39777e+06	10000960	6.53484e+06
Q61035	Histidine--tRNA ligase, cytoplasmic OS=Mus musculus OX=10090 GN=Hars PE=1 SV=2	7	93002553	90034863	5.57333e+07	6.86218e+07	7.25999e+07	8.30643e+07	1.06443e+08	80971393	9.61523e+07
Q61062	Segment polarity protein dishevelled homolog DVL-3 OS=Mus musculus OX=10090 GN=Dvl3 PE=1 SV=2	12	1188543197	742637358	5.30525e+08	1.22255e+08	79934112	6.17315e+07	3.88968e+08	4.0211e+08	4.20229e+08
Q61074	Protein phosphatase 1G OS=Mus musculus OX=10090 GN=Ppm1g PE=1 SV=3	4	27049078	3.26249e+07	2.32096e+07	1.88524e+07	1.67568e+07	19009705	31520723	2.92791e+07	20084048
Q61081	Hsp90 co-chaperone Cdc37 OS=Mus musculus OX=10090 GN=Cdc37 PE=1 SV=1	9	160963194	1.31648e+08	6.72465e+07	1.01537e+08	1.1595e+08	83891443	1.02697e+08	1.09195e+08	1.05537e+08
Q61137	Astrotactin-1 OS=Mus musculus OX=10090 GN=Astn1 PE=1 SV=4	13	1.68329e+08	131983214	82264984	98995791	1.25043e+08	8.75448e+07	1.50167e+08	1.24768e+08	1.11494e+08
Q61140	Breast cancer anti-estrogen resistance protein 1 OS=Mus musculus OX=10090 GN=Bcar1 PE=1 SV=2	2	20390198	1.68319e+07	2.03058e+06		3.51873e+06	2.43343e+06	2.37089e+06	3843093	3.97418e+06
Q61151	Serine/threonine-protein phosphatase 2A 56 kDa regulatory subunit epsilon isoform OS=Mus musculus OX=10090 GN=Ppp2r5e PE=1 SV=3	1	10111204	11535723	11226451	7942056	8881439	5928056	9191601	10947003	8204948
Q61161	Mitogen-activated protein kinase kinase kinase kinase 2 OS=Mus musculus OX=10090 GN=Map4k2 PE=1 SV=1	2	19676948	21094317	13136282	7.34468e+06	5.65884e+06	3078837	5.74314e+06	4452210	6535544
Q61165	Sodium/hydrogen exchanger 1 OS=Mus musculus OX=10090 GN=Slc9a1 PE=1 SV=1	1	14407756	8608260	5.82545e+06	6.10744e+06		5152516	5.31559e+06	6.03836e+06	4.62441e+06
Q61166	Microtubule-associated protein RP/EB family member 1 OS=Mus musculus OX=10090 GN=Mapre1 PE=1 SV=3	6	1.06162e+08	8.71452e+07	9.09108e+07	47245976	74214864	45307486	7.64943e+07	77414243	68030638
Q61171	Peroxiredoxin-2 OS=Mus musculus OX=10090 GN=Prdx2 PE=1 SV=3	12	4659544472	4402137746	3606828562	3976602123	4543963463	3627669328	4228792645	4123309219	4215329729
Q61187	Tumor susceptibility gene 101 protein OS=Mus musculus OX=10090 GN=Tsg101 PE=1 SV=2	2	44122487	14243832	1.47898e+07	11232989	7.54714e+06	10471523	1.25136e+07	12741547	12419145
Q61191	Host cell factor 1 OS=Mus musculus OX=10090 GN=Hcfc1 PE=1 SV=2	8	1.03635e+08	1.40409e+08	770020425	1.86729e+08	139076361	404956982	2.97602e+08	298036967	279744165
Q61205	Platelet-activating factor acetylhydrolase IB subunit gamma OS=Mus musculus OX=10090 GN=Pafah1b3 PE=1 SV=1	2	27253886	25443247	1.9645e+07	16153692	17881536	1.60974e+07	1.88019e+07	19550252	2.11688e+07
Q61206	Platelet-activating factor acetylhydrolase IB subunit beta OS=Mus musculus OX=10090 GN=Pafah1b2 PE=1 SV=2	4	265085570	136444943	1.70808e+08	1.89371e+08	181648512	155393115	201103018	1.92414e+08	205916485
Q61220	Protein kinase C-binding protein NELL2 OS=Mus musculus OX=10090 GN=Nell2 PE=1 SV=3	2	5.14491e+06	1.75038e+06	1.40285e+07	12069591	14763525	9.16354e+06	12569877	1.96826e+07	14122810
Q61234	Alpha-1-syntrophin OS=Mus musculus OX=10090 GN=Snta1 PE=1 SV=1	7	1.0399e+08	85884844	8.12312e+07	59090602	53614967	78726867	89209483	7.17242e+07	79889209
Q61249	Immunoglobulin-binding protein 1 OS=Mus musculus OX=10090 GN=Igbp1 PE=1 SV=1	3	19540255	14677296	1.85662e+06		4193723		7.90589e+06	1.60586e+06	6355977
Q61292	Laminin subunit beta-2 OS=Mus musculus OX=10090 GN=Lamb2 PE=1 SV=2	2	11532156	11601545	8888097	4283549	4.06062e+06	1.04519e+07	8.46586e+06	8.81535e+06	1.2404e+07
Q61301	Catenin alpha-2 OS=Mus musculus OX=10090 GN=Ctnna2 PE=1 SV=3	10	1.84282e+08	1.48494e+08	125821941	94796454	1.0022e+08	1.18577e+08	150164209	1.44099e+08	146658094
Q61315	Adenomatous polyposis coli protein OS=Mus musculus OX=10090 GN=Apc PE=1 SV=1	2	7581164	5165085				3919850	2.99105e+06
Q61316	Heat shock 70 kDa protein 4 OS=Mus musculus OX=10090 GN=Hspa4 PE=1 SV=1	44	3436480633	3037497435	1616874358	2947682196	3034680750	2414248683	2678759628	2485775854	2468291029
Q61330	Contactin-2 OS=Mus musculus OX=10090 GN=Cntn2 PE=1 SV=2	4	2.94949e+07	14840307	20203476	1.40051e+07	1.72018e+07	2.05582e+07	1.74623e+07	13465899	1.42593e+07
Q61361	Brevican core protein OS=Mus musculus OX=10090 GN=Bcan PE=1 SV=2	15	9.78801e+08	8.21763e+08	5.95854e+08	7.50735e+08	8.04239e+08	7.14949e+08	7.05351e+08	6.38895e+08	8.23736e+08
Q61411	GTPase HRas OS=Mus musculus OX=10090 GN=Hras PE=1 SV=2	8	618056082	413939385	304340592	443083776	528261194	421188120	4.52099e+08	428267455	4.22252e+08
Q61418	H(+)/Cl(-) exchange transporter 4 OS=Mus musculus OX=10090 GN=Clcn4 PE=2 SV=2	1	15421460	1.06096e+07	10172938	13971202	16578322	10486703	11707485	1.62489e+07	15517214
Q61481	Calcium/calmodulin-dependent 3',5'-cyclic nucleotide phosphodiesterase 1A OS=Mus musculus OX=10090 GN=Pde1a PE=1 SV=2	7	8.6441e+07	70963019	40488391	80226091	89777333	6.58037e+07	6.68264e+07	75913290	7.92996e+07
Q61490	CD166 antigen OS=Mus musculus OX=10090 GN=Alcam PE=1 SV=3	12	397839818	351049823	2.60436e+08	4.02384e+08	3.76856e+08	3.47256e+08	355746493	362009128	3.6178e+08
Q61548	Clathrin coat assembly protein AP180 OS=Mus musculus OX=10090 GN=Snap91 PE=1 SV=1	18	1849062550	1211386908	9.33445e+08	5.56109e+08	5.14016e+08	392269746	8.43277e+08	8.65757e+08	8.47819e+08
Q61553	Fascin OS=Mus musculus OX=10090 GN=Fscn1 PE=1 SV=4	18	1514712791	1532620019	1071992342	1731682540	1563329471	1475990985	1385125915	1402470080	1430064145
Q61584	Fragile X mental retardation syndrome-related protein 1 OS=Mus musculus OX=10090 GN=Fxr1 PE=1 SV=2	4	66228995	57193038	49429210	4.55977e+07	4.5028e+07	5.27298e+07	52360105	43584301	3.49473e+07
Q61595	Kinectin OS=Mus musculus OX=10090 GN=Ktn1 PE=1 SV=1	21	4.10576e+08	3.67465e+08	2.23394e+08	1.1166e+08	1.68017e+08	1.10358e+08	2.18334e+08	1.93966e+08	2.10491e+08
Q61598	Rab GDP dissociation inhibitor beta OS=Mus musculus OX=10090 GN=Gdi2 PE=1 SV=1	24	2145669736	2061897051	2119814315	1968570317	2147569484	1881473332	2021258471	1921581222	1921963287
Q61599	Rho GDP-dissociation inhibitor 2 OS=Mus musculus OX=10090 GN=Arhgdib PE=1 SV=3	4	3.44215e+07	73126802	1.93865e+07	3.63399e+07	82156173	6.00306e+07	42801604	74042493	35167306
Q61625	Glutamate receptor ionotropic, delta-2 OS=Mus musculus OX=10090 GN=Grid2 PE=1 SV=1	8	9.49607e+07	4.74654e+07	82543968	5.94936e+07	63201914	5.38306e+07	61998148	82034386	7.29299e+07
Q61644	Protein kinase C and casein kinase substrate in neurons protein 1 OS=Mus musculus OX=10090 GN=Pacsin1 PE=1 SV=1	18	1144896797	9.89232e+08	7.49716e+08	8.13971e+08	852376679	6.65145e+08	8.81978e+08	8.54059e+08	845011634
Q61655	ATP-dependent RNA helicase DDX19A OS=Mus musculus OX=10090 GN=Ddx19a PE=1 SV=2	6	65555301	6.85315e+07	5.68209e+07	59062310	152855767	4.43427e+07	6.4133e+07	6.56663e+07	6.72379e+07
Q61656	Probable ATP-dependent RNA helicase DDX5 OS=Mus musculus OX=10090 GN=Ddx5 PE=1 SV=2	14	3.64098e+08	2.5126e+08	1.92756e+08	3.26874e+08	2.48812e+08	2.66919e+08	2.43358e+08	2.65302e+08	2.67369e+08
Q61699	Heat shock protein 105 kDa OS=Mus musculus OX=10090 GN=Hsph1 PE=1 SV=2	30	1168241175	9.0532e+08	6.72293e+08	7.94409e+08	819557416	6.92098e+08	8.29437e+08	8.23571e+08	8.179e+08
Q61701	ELAV-like protein 4 OS=Mus musculus OX=10090 GN=Elavl4 PE=1 SV=1	10	2.52812e+08	234268798	1.97267e+08	1.83241e+08	2.40591e+08	1.92037e+08	2.03861e+08	2.34446e+08	2.10942e+08
Q61735	Leukocyte surface antigen CD47 OS=Mus musculus OX=10090 GN=Cd47 PE=1 SV=2	2	142718859	1.32841e+08	8.8644e+07	8.35886e+07	87361856	5.67208e+07	8.64876e+07	87324024	9.89118e+07
Q61753	D-3-phosphoglycerate dehydrogenase OS=Mus musculus OX=10090 GN=Phgdh PE=1 SV=3	10	1179924980	1311439731	1223047029	1099894793	1529249128	1302417253	1315823767	1299690263	1375725959
Q61768	Kinesin-1 heavy chain OS=Mus musculus OX=10090 GN=Kif5b PE=1 SV=3	20	3.6521e+08	3.45002e+08	2.18879e+08	302337572	3.28953e+08	2.59118e+08	2.73816e+08	253037509	2.51534e+08
Q61792	LIM and SH3 domain protein 1 OS=Mus musculus OX=10090 GN=Lasp1 PE=1 SV=1	17	2069221414	1885906232	1207660890	863385873	1010889271	7.79806e+08	1217241470	1273051445	1250789630
Q61831	Mitogen-activated protein kinase 10 OS=Mus musculus OX=10090 GN=Mapk10 PE=1 SV=2	3	56513346	3.28654e+07	39313154	39740449	2.98013e+07	2.80801e+07	3.50368e+07	4.69833e+07	3.8365e+07
Q61838	Pregnancy zone protein OS=Mus musculus OX=10090 GN=Pzp PE=1 SV=3	6	64344748	28373017	2.37798e+07	3.59297e+07	42043835	17822642	3.2823e+07	3.71499e+07	2.86024e+07
Q61879	Myosin-10 OS=Mus musculus OX=10090 GN=Myh10 PE=1 SV=2	44	5.1468e+08	539194153	3.49462e+08	6.38211e+08	4.81423e+08	4.7654e+08	5.14783e+08	4.43614e+08	4.73983e+08
Q61885	Myelin-oligodendrocyte glycoprotein OS=Mus musculus OX=10090 GN=Mog PE=1 SV=1	13	762499607	6.43766e+08	5.90606e+08	6.91896e+08	742479657	6.82806e+08	6.83843e+08	7.20655e+08	6.43871e+08
Q61937	Nucleophosmin OS=Mus musculus OX=10090 GN=Npm1 PE=1 SV=1	4	2.46841e+07	1.28148e+07	3.34983e+07	23052122	45607966	2.48661e+07	40130628	3.07129e+07	4.41404e+07
Q61941	NAD(P) transhydrogenase, mitochondrial OS=Mus musculus OX=10090 GN=Nnt PE=1 SV=2	1	4.18636e+06	1.97277e+06				3.26367e+06
Q61990	Poly(rC)-binding protein 2 OS=Mus musculus OX=10090 GN=Pcbp2 PE=1 SV=1	5	4.96168e+08	4.21798e+08	317965306	346533486	4.01302e+08	3.43346e+08	374301705	378102263	395895476
Q62048	Astrocytic phosphoprotein PEA-15 OS=Mus musculus OX=10090 GN=Pea15 PE=1 SV=1	2	46770610	40341646	17342579	1.46651e+07	13674806	9.5464e+06	27428194	22761451	2.00961e+07
Q62059	Versican core protein OS=Mus musculus OX=10090 GN=Vcan PE=1 SV=2	3	43241332	32973139	25787766	30765154	30089191	26454217	3.25566e+07	32868691	41121636
Q62077	1-phosphatidylinositol 4,5-bisphosphate phosphodiesterase gamma-1 OS=Mus musculus OX=10090 GN=Plcg1 PE=1 SV=2	6	27104970	4.55804e+07	1.0179e+08	5.65204e+07	45945146	3.55349e+07	4.17839e+07	3.8726e+07	4.67255e+07
Q62083	PRKCA-binding protein OS=Mus musculus OX=10090 GN=Pick1 PE=1 SV=2	4	89067073	3.91434e+07	3.32833e+07	2.24085e+07	2.44972e+07	5.29584e+06	34204282	3.15868e+07	3.14073e+07
Q62086	Serum paraoxonase/arylesterase 2 OS=Mus musculus OX=10090 GN=Pon2 PE=1 SV=2	2	1.00079e+07	7.3871e+06	4999303	9160790	5.89871e+06	3.22014e+06	9.91302e+06	2.35599e+06	7.71759e+06
Q62108	Disks large homolog 4 OS=Mus musculus OX=10090 GN=Dlg4 PE=1 SV=1	12	1.88948e+08	1.3391e+08	139120419	6.94542e+07	1.08816e+08	9.6707e+07	99404039	1.003e+08	1.39357e+08
Q62159	Rho-related GTP-binding protein RhoC OS=Mus musculus OX=10090 GN=Rhoc PE=1 SV=2	1	2.75177e+06	1.60199e+06		1.00661e+06	1.5455e+06	1.36763e+06	1.65473e+06	1.32978e+06	1807066
Q62167	ATP-dependent RNA helicase DDX3X OS=Mus musculus OX=10090 GN=Ddx3x PE=1 SV=3	29	1594862045	1304783125	987778226	6.11733e+08	656376647	515491922	7.09525e+08	839049068	8.55963e+08
Q62178	Semaphorin-4A OS=Mus musculus OX=10090 GN=Sema4a PE=1 SV=2	2	4266926	6282912	9890200	2.19302e+06	3.84231e+06	4353621	5.68342e+06	5.14867e+06	4985834
Q62186	Translocon-associated protein subunit delta OS=Mus musculus OX=10090 GN=Ssr4 PE=1 SV=1	4	106604408	1.10121e+08	98188443	117796014	132853991	103943967	131052939	118397083	98293211
Q62188	Dihydropyrimidinase-related protein 3 OS=Mus musculus OX=10090 GN=Dpysl3 PE=1 SV=1	35	7631699506	6632089164	5739160628	6400915405	6792808357	5486609153	6269153488	6232369987	6298405037
Q62261	Spectrin beta chain, non-erythrocytic 1 OS=Mus musculus OX=10090 GN=Sptbn1 PE=1 SV=2	102	4589511696	4376312259	3281073724	4222184549	4455047716	3935955202	4020105714	4031729745	4087120284
Q62277	Synaptophysin OS=Mus musculus OX=10090 GN=Syp PE=1 SV=2	7	2054349601	1821467506	1470425698	1894640561	1863709382	1723874558	1857003699	1841010873	1796466248
Q62283	Tetraspanin-7 OS=Mus musculus OX=10090 GN=Tspan7 PE=1 SV=2	3	108524221	112965071	95458003	106524708	127932248	84033847	104353505	107027141	101857627
Q62318	Transcription intermediary factor 1-beta OS=Mus musculus OX=10090 GN=Trim28 PE=1 SV=3	14	2.18741e+08	292487949	1470668983	3.16499e+08	275505558	5.2644e+08	4.82595e+08	5.00811e+08	493499168
Q62348	Translin OS=Mus musculus OX=10090 GN=Tsn PE=1 SV=1	3	23668494	20997641	1.76035e+07	19157115	16732416	8.91877e+06	1.24231e+07	1.58435e+07	22166342
Q62351	Transferrin receptor protein 1 OS=Mus musculus OX=10090 GN=Tfrc PE=1 SV=1	13	1.86225e+08	1.3343e+08	1.31226e+08	1.71531e+08	185903029	1.62135e+08	1.70812e+08	197816132	1.50583e+08
Q62393	Tumor protein D52 OS=Mus musculus OX=10090 GN=Tpd52 PE=1 SV=2	2	20586007	7.52961e+06	6508099				7.11799e+06		3.85628e+06
Q62417	Sorbin and SH3 domain-containing protein 1 OS=Mus musculus OX=10090 GN=Sorbs1 PE=1 SV=2	31	7.77101e+08	5.9185e+08	3.24392e+08	1.0451e+08	1.45245e+08	1.13265e+08	300432047	3.30747e+08	2.98117e+08
Q62418	Drebrin-like protein OS=Mus musculus OX=10090 GN=Dbnl PE=1 SV=2	25	2692635286	1884127267	1659970215	2.14758e+08	2.29663e+08	1.96499e+08	9.22343e+08	9.66406e+08	1000546535
Q62419	Endophilin-A2 OS=Mus musculus OX=10090 GN=Sh3gl1 PE=1 SV=1	8	5306136770	5350093001	5749734810	5015378182	4671428760	5457255342	5205299343	5421411364	5242132544
Q62420	Endophilin-A1 OS=Mus musculus OX=10090 GN=Sh3gl2 PE=1 SV=2	13	1377311605	823330115	597107423	2.65878e+08	2.51827e+08	1.77332e+08	509501334	5.44494e+08	5.37823e+08
Q62426	Cystatin-B OS=Mus musculus OX=10090 GN=Cstb PE=1 SV=1	5	2.19715e+08	226401365	8.18619e+07	201712683	217769828	1.78683e+08	206593133	193900037	193293837
Q62433	Protein NDRG1 OS=Mus musculus OX=10090 GN=Ndrg1 PE=1 SV=1	4	5.06579e+07	3.03951e+07	2.83606e+07	27443180	2.76651e+07	2.97147e+07	29676704	2.69035e+07	4.05298e+07
Q62443	Neuronal pentraxin-1 OS=Mus musculus OX=10090 GN=Nptx1 PE=1 SV=1	6	1.08317e+08	88855107	5.78253e+07	1.03275e+08	1.10742e+08	87187828	9.07831e+07	103544306	9.63425e+07
Q62446	Peptidyl-prolyl cis-trans isomerase FKBP3 OS=Mus musculus OX=10090 GN=Fkbp3 PE=1 SV=2	2	23685143	22316382	10421346	8763859	6.65402e+06	5.95937e+06	10521829	14257327	7.19536e+06
Q62448	Eukaryotic translation initiation factor 4 gamma 2 OS=Mus musculus OX=10090 GN=Eif4g2 PE=1 SV=2	11	133333133	7.50956e+07	7.05147e+07	7.57109e+06	9.41002e+06	1.03345e+06	42229896	49467070	4.56899e+07
Q62465	Synaptic vesicle membrane protein VAT-1 homolog OS=Mus musculus OX=10090 GN=Vat1 PE=1 SV=3	13	5.01335e+08	484653406	434780867	424283315	4.87333e+08	3.78026e+08	458321462	446850842	4.78667e+08
Q62523	Zyxin OS=Mus musculus OX=10090 GN=Zyx PE=1 SV=2	3	3.35768e+07	30336232	2.59127e+07	2.78851e+07	12006855	23558144	2.68595e+07	2.40719e+07	20194566
Q63739	Protein tyrosine phosphatase type IVA 1 OS=Mus musculus OX=10090 GN=Ptp4a1 PE=1 SV=1	2	18927650	1.59576e+07	9.35415e+06	1.14024e+07	15909203	1.04802e+07	15422795	1.83632e+07	1.19379e+07
Q63810	Calcineurin subunit B type 1 OS=Mus musculus OX=10090 GN=Ppp3r1 PE=1 SV=3	4	77180882	6.81261e+07	28522307	5.53479e+07	5.01225e+07	18066897	38114242	4.60323e+07	53609257
Q63844	Mitogen-activated protein kinase 3 OS=Mus musculus OX=10090 GN=Mapk3 PE=1 SV=5	8	1.22842e+08	75373947	6.40313e+07	7.21712e+07	5.56556e+07	53418204	6.16624e+07	61512947	73815124
Q63932	Dual specificity mitogen-activated protein kinase kinase 2 OS=Mus musculus OX=10090 GN=Map2k2 PE=1 SV=2	4	29401608	17610771	8.06514e+06	22577471	1.25105e+07	1.26458e+07	16374936	17426364	17680595
Q63943	Myocyte-specific enhancer factor 2D OS=Mus musculus OX=10090 GN=Mef2d PE=1 SV=2	1	6.02617e+06	5236852	3890038	3.83849e+06	4537588	3.52828e+06	3.57158e+06	5215617
Q63959	Potassium voltage-gated channel subfamily C member 3 OS=Mus musculus OX=10090 GN=Kcnc3 PE=1 SV=2	2	16340200	5.78212e+06	2.91528e+06	8.7818e+06		7.01385e+06	7.74409e+06	10172839	4.49553e+06
Q64012	RNA-binding protein Raly OS=Mus musculus OX=10090 GN=Raly PE=1 SV=3	5	59355923	3.84318e+07	30111105	32409913	31416498	2.75688e+07	2.27061e+07	34587366	25646654
Q640R3	Hepatocyte cell adhesion molecule OS=Mus musculus OX=10090 GN=Hepacam PE=1 SV=2	7	165620502	1.16692e+08	5.69792e+07	9.10611e+07	101312442	74153600	113366666	1.20867e+08	131956829
Q64105	Sepiapterin reductase OS=Mus musculus OX=10090 GN=Spr PE=1 SV=1	7	147493754	1.00937e+08	1.26259e+08	8.8336e+07	117330576	8.21331e+07	1.16792e+08	1.00836e+08	1.08773e+08
Q64133	Amine oxidase [flavin-containing] A OS=Mus musculus OX=10090 GN=Maoa PE=1 SV=3	13	1025918685	9.7448e+08	1462617064	1243638655	1287811937	1645485691	1315826974	1270616326	1276227283
Q641P0	Actin-related protein 3B OS=Mus musculus OX=10090 GN=Actr3b PE=1 SV=1	6	127933541	1.02603e+08	136636540	8.17818e+07	84046749	93539786	101214321	121926402	119771324
Q64213	Splicing factor 1 OS=Mus musculus OX=10090 GN=Sf1 PE=1 SV=6	2	1.9316e+07	20747895	7403298	1.53733e+07	10405506	10764732	7.58768e+06	7.66814e+06	6515420
Q64310	Surfeit locus protein 4 OS=Mus musculus OX=10090 GN=Surf4 PE=1 SV=1	3	57384666	44328996	53579200	59165850	59626785	4.49372e+07	5.11205e+07	52882329	4.94877e+07
Q64331	Unconventional myosin-VI OS=Mus musculus OX=10090 GN=Myo6 PE=1 SV=1	8	60716922	4.54417e+07	4.88333e+07	3.97093e+07	4.53505e+07	3.9337e+07	4.04913e+07	3.53811e+07	33846791
Q64332	Synapsin-2 OS=Mus musculus OX=10090 GN=Syn2 PE=1 SV=2	20	4276233792	3451030154	2643685611	3603667958	3430518449	3220532008	3385436513	3372970454	3453609218
Q64337	Sequestosome-1 OS=Mus musculus OX=10090 GN=Sqstm1 PE=1 SV=1	1	34235841	19712718	1.9677e+07	1.3277e+07	3.66537e+06	3167545	1.77317e+07	1.44091e+07	12657042
Q64433	10 kDa heat shock protein, mitochondrial OS=Mus musculus OX=10090 GN=Hspe1 PE=1 SV=2	15	16064649827	15260352152	7263320623	1.8105e+08	111435670	1.95845e+08	5128903376	5162034416	5164711165
Q64442	Sorbitol dehydrogenase OS=Mus musculus OX=10090 GN=Sord PE=1 SV=3	3	4.37436e+07	2.81819e+07	2.29941e+07	28584869	1.66492e+07	22308681	27124824	26564156	31939687
Q64487	Receptor-type tyrosine-protein phosphatase delta OS=Mus musculus OX=10090 GN=Ptprd PE=1 SV=3	25	3.52168e+08	3.56077e+08	2.26246e+08	3.97028e+08	3.38719e+08	318846045	3.23249e+08	3.36272e+08	3.26067e+08
Q64511	DNA topoisomerase 2-beta OS=Mus musculus OX=10090 GN=Top2b PE=1 SV=2	2	3.94007e+06	8.32547e+06	12649723	746190			2.03507e+06	2.48251e+06	1.7893e+06
Q64514	Tripeptidyl-peptidase 2 OS=Mus musculus OX=10090 GN=Tpp2 PE=1 SV=3	34	9.70341e+08	7.15533e+08	6.41897e+08	870082577	9.01022e+08	8.68843e+08	8.65126e+08	8.35663e+08	815824721
Q64674	Spermidine synthase OS=Mus musculus OX=10090 GN=Srm PE=1 SV=1	8	210461126	1.64249e+08	164044033	175851331	127231926	1.57883e+08	2.04166e+08	1.99929e+08	1.53651e+08
Q64676	2-hydroxyacylsphingosine 1-beta-galactosyltransferase OS=Mus musculus OX=10090 GN=Ugt8 PE=1 SV=2	7	1.58166e+08	108950174	1.16992e+08	1.1652e+08	1.52831e+08	9.42489e+07	1.08831e+08	1.20083e+08	122032184
Q64737	Trifunctional purine biosynthetic protein adenosine-3 OS=Mus musculus OX=10090 GN=Gart PE=1 SV=3	10	1.0565e+08	8.96245e+07	67111391	8.0252e+07	100816904	7.61493e+07	1.00058e+08	9.57495e+07	99479891
Q66L42	Mitogen-activated protein kinase kinase kinase 10 OS=Mus musculus OX=10090 GN=Map3k10 PE=1 SV=2	6	84550494	50200242	3.75367e+07	5.43108e+06			9.86127e+06	2.4372e+07	1.2514e+07
Q68ED2	Metabotropic glutamate receptor 7 OS=Mus musculus OX=10090 GN=Grm7 PE=1 SV=1	2	8.29435e+06	1.70544e+07	9.28455e+06	6.99629e+06	1.40319e+07	16637725	14948522	15431521	12721904
Q68ED7	CREB-regulated transcription coactivator 1 OS=Mus musculus OX=10090 GN=Crtc1 PE=1 SV=1	6	1.496e+08	1.10556e+08	8.39406e+07	1.32858e+07	1.02194e+07	3.1195e+06	57892789	5.69959e+07	6.75773e+07
Q68EF4	Metabotropic glutamate receptor 4 OS=Mus musculus OX=10090 GN=Grm4 PE=1 SV=2	1	6.18814e+06	4.19597e+06	3921761	3.39096e+06	5.46832e+06		5.97201e+06	5.5158e+06	4.12429e+06
Q68EF6	Brain-enriched guanylate kinase-associated protein OS=Mus musculus OX=10090 GN=Begain PE=1 SV=2	1	9954774	8.17e+06	10901935		6.5429e+06		6.98343e+06	1.39145e+06	1.10615e+06
Q68FD5	Clathrin heavy chain 1 OS=Mus musculus OX=10090 GN=Cltc PE=1 SV=3	95	16284522702	15753611964	14621577305	14181983657	16767416417	15233513078	14842112866	14681290326	15113115045
Q68FD9	UPF0606 protein KIAA1549 OS=Mus musculus OX=10090 GN=Kiaa1549 PE=1 SV=3	3	34227088	10923403	8301976	2.54389e+06			8.04909e+06	10530421	13089104
Q68FF6	ARF GTPase-activating protein GIT1 OS=Mus musculus OX=10090 GN=Git1 PE=1 SV=1	15	383011278	315905387	2.2503e+08	1.84214e+08	1.88783e+08	1.40747e+08	2.161e+08	236483000	2.4682e+08
Q68FH0	Plakophilin-4 OS=Mus musculus OX=10090 GN=Pkp4 PE=1 SV=1	2	39394357	19239949	1.34102e+07	6.96217e+06	14297550	13802427	18182465	12770038	2.01357e+07
Q68FL4	Putative adenosylhomocysteinase 3 OS=Mus musculus OX=10090 GN=Ahcyl2 PE=1 SV=1	6	2.86719e+08	1.38735e+08	1.30657e+08	182756627	335801497	1.60344e+08	152067952	153760547	167180845
Q68FL6	Methionine--tRNA ligase, cytoplasmic OS=Mus musculus OX=10090 GN=Mars PE=1 SV=1	20	425305673	420520078	2956962227	348595878	378639441	3.92379e+08	7.52403e+08	7.43037e+08	7.40514e+08
Q68FM6	Protein phosphatase 1 regulatory subunit 29 OS=Mus musculus OX=10090 GN=Elfn2 PE=1 SV=1	5	85877883	60070577	47191242	12208551	9.19928e+06	5.06392e+06	1.37063e+07	3.24893e+07	25032643
Q69Z98	Serine/threonine-protein kinase BRSK2 OS=Mus musculus OX=10090 GN=Brsk2 PE=1 SV=2	2	2.68167e+07	21125235	12183078	11214992	1.54253e+07	15891976	1.68551e+07	14973067	18456098
Q69ZF3	Non-lysosomal glucosylceramidase OS=Mus musculus OX=10090 GN=Gba2 PE=1 SV=2	3	62490723	5.58744e+07	3.55724e+07	4.57356e+07	53819062	31840650	4.40156e+07	43314816	4.34091e+07
Q69ZK0	Phosphatidylinositol 3,4,5-trisphosphate-dependent Rac exchanger 1 protein OS=Mus musculus OX=10090 GN=Prex1 PE=1 SV=2	8	139439481	116831167	1.01329e+08	115313808	1.27612e+08	8.99271e+07	113791121	115673186	1.10743e+08
Q69ZK9	Neuroligin-2 OS=Mus musculus OX=10090 GN=Nlgn2 PE=1 SV=2	5	85628822	72289253	68642963	75050094	69566312	62309193	69152487	66362433	67085012
Q69ZS6	Synaptic vesicle glycoprotein 2C OS=Mus musculus OX=10090 GN=Sv2c PE=1 SV=2	2	1.63673e+07	1.57235e+07	8.7102e+06	14200452	16162004	1.50164e+07	16708697	1.28015e+07	16012688
Q6A065	Centrosomal protein of 170 kDa OS=Mus musculus OX=10090 GN=Cep170 PE=1 SV=2	25	5.28714e+08	2.73427e+08	1.57374e+08	6.44547e+07	4.74532e+07	2.25377e+07	1.66091e+08	1.67112e+08	1.31128e+08
Q6A0A9	Constitutive coactivator of PPAR-gamma-like protein 1 OS=Mus musculus OX=10090 GN=FAM120A PE=1 SV=2	9	161044939	1.53453e+08	120363696	135882156	1.62514e+08	9.84954e+07	130168348	1.21806e+08	1.39599e+08
Q6A4J8	Ubiquitin carboxyl-terminal hydrolase 7 OS=Mus musculus OX=10090 GN=Usp7 PE=1 SV=1	13	1.57227e+08	114367049	1.00922e+08	1.4334e+08	1.2349e+08	1.2261e+08	1.2811e+08	118573717	119590933
Q6AXF6	SID1 transmembrane family member 1 OS=Mus musculus OX=10090 GN=Sidt1 PE=1 SV=1	1	5.22702e+06	7.66924e+06	8809029	8139371	8429529	4971244	5436029	7.10092e+06	8762147
Q6DFV7	Nuclear receptor coactivator 7 OS=Mus musculus OX=10090 GN=Ncoa7 PE=1 SV=2	1	7.08373e+06	3.88255e+06	2.01001e+06			1.83894e+06	4639317		2.64853e+06
Q6GQT9	Nodal modulator 1 OS=Mus musculus OX=10090 GN=Nomo1 PE=1 SV=1	14	2.05503e+08	1.81295e+08	1.54814e+08	192983498	201824437	1.76319e+08	1.74265e+08	1.77665e+08	179136416
Q6GV12	3-ketodihydrosphingosine reductase OS=Mus musculus OX=10090 GN=Kdsr PE=1 SV=1	2	1.68343e+07	1.01727e+07	3522835	3.89299e+06	1.81352e+07	1.72546e+07	4.01492e+06	4.95085e+06	4.44499e+06
Q6GYP7	Ral GTPase-activating protein subunit alpha-1 OS=Mus musculus OX=10090 GN=Ralgapa1 PE=1 SV=1	3	8942083	9.52146e+06	9.81507e+06	8.65559e+06	9.74684e+06	7.07271e+06	8.39705e+06	9.24879e+06	8.47324e+06
Q6I6G8	E3 ubiquitin-protein ligase HECW2 OS=Mus musculus OX=10090 GN=Hecw2 PE=1 SV=1	1		5.92966e+06	3.72353e+06	7605715		6137103	7.82533e+06		4762563
Q6IR34	G-protein-signaling modulator 1 OS=Mus musculus OX=10090 GN=Gpsm1 PE=1 SV=3	7	5.52996e+07	4.06778e+07	58735076	3.69822e+07	2.26039e+07	3.7228e+07	6.60524e+07	8.32867e+07	8.14601e+07
Q6IRU5	Clathrin light chain B OS=Mus musculus OX=10090 GN=Cltb PE=1 SV=1	2	25244603	25588843	10434718	1.35138e+07	4.94869e+06	12366134	18067027	13824510	18100306
Q6KAU4	Multivesicular body subunit 12B OS=Mus musculus OX=10090 GN=Mvb12b PE=1 SV=2	1	5.14308e+06	4.86414e+06	4829713	11334794	17391900	5034015	7488607	5.28328e+06	6.57912e+06
Q6NS52	Diacylglycerol kinase beta OS=Mus musculus OX=10090 GN=Dgkb PE=1 SV=2	6	78304446	4.9692e+07	54965387	44901256	53949630	43065311	66859828	50241899	60616029
Q6NS60	F-box only protein 41 OS=Mus musculus OX=10090 GN=Fbxo41 PE=1 SV=3	9	1.78672e+08	1.12725e+08	112657861	8.50874e+07	88814115	1.2521e+08	115565881	118420822	1.13023e+08
Q6NSW3	A-kinase anchor protein SPHKAP OS=Mus musculus OX=10090 GN=Sphkap PE=1 SV=2	2	22048423	16759877	1.18645e+07	4.91033e+06	5681643		8.48854e+06	5040318	8.98173e+06
Q6NVE8	WD repeat-containing protein 44 OS=Mus musculus OX=10090 GN=Wdr44 PE=1 SV=1	1	9945843	8271628		7263177	7.11585e+06	4342741	6.99739e+06	7.07981e+06	6.89799e+06
Q6NVF0	Inositol polyphosphate 5-phosphatase OCRL-1 OS=Mus musculus OX=10090 GN=Ocrl PE=1 SV=1	4	2.33202e+07	3.24887e+07	17778467	1.08173e+07	1.19562e+07	2.06977e+07	23849126	24602084	27956364
Q6NXK7	Inactive dipeptidyl peptidase 10 OS=Mus musculus OX=10090 GN=Dpp10 PE=1 SV=1	19	4.34901e+08	3.34847e+08	3.51438e+08	413354698	4.42442e+08	4.46617e+08	4.33403e+08	3.90485e+08	3.73269e+08
Q6NZC7	SEC23-interacting protein OS=Mus musculus OX=10090 GN=Sec23ip PE=1 SV=2	4	50745409	5.44856e+07	4.86312e+07	58366211	55231840	4.61971e+07	3.91151e+07	5.19829e+07	5.12102e+07
Q6NZJ6	Eukaryotic translation initiation factor 4 gamma 1 OS=Mus musculus OX=10090 GN=Eif4g1 PE=1 SV=1	12	143297528	1.1696e+08	1.33111e+08	109591730	1.05244e+08	1.02003e+08	1.21557e+08	9.31092e+07	1.07583e+08
Q6NZL0	Protein SOGA3 OS=Mus musculus OX=10090 GN=Soga3 PE=1 SV=2	12	1.51418e+08	1.30107e+08	88232683	7.42234e+07	7.31601e+07	8.38738e+07	9.73505e+07	9.80104e+07	9.3705e+07
Q6P069	Sorcin OS=Mus musculus OX=10090 GN=Sri PE=1 SV=1	4	66175803	53896544	57640873	5.26062e+07	50024983	4.5891e+07	50198057	55044303	57334325
Q6P1B1	Xaa-Pro aminopeptidase 1 OS=Mus musculus OX=10090 GN=Xpnpep1 PE=1 SV=1	20	546280233	4.67328e+08	3.55232e+08	4.54433e+08	4.82954e+08	421560060	4.31582e+08	428475833	4.38367e+08
Q6P1F6	Serine/threonine-protein phosphatase 2A 55 kDa regulatory subunit B alpha isoform OS=Mus musculus OX=10090 GN=Ppp2r2a PE=1 SV=1	15	6.73304e+08	6.57946e+08	442965732	5.96541e+08	5.87739e+08	550659121	5.86509e+08	5.41062e+08	536134170
Q6P4S6	Serine/threonine-protein kinase SIK3 OS=Mus musculus OX=10090 GN=Sik3 PE=1 SV=3	9	117121402	111372351	58063947	9.69516e+07	1.06459e+08	88423531	8.96113e+07	1.25821e+08	1.22336e+08
Q6P4T2	U5 small nuclear ribonucleoprotein 200 kDa helicase OS=Mus musculus OX=10090 GN=Snrnp200 PE=1 SV=1	6	5.57545e+07	3.95658e+07	4.27695e+07	33416868	4.30778e+07	4.71988e+07	3.87392e+07	46305308	4.34912e+07
Q6P5E4	UDP-glucose:glycoprotein glucosyltransferase 1 OS=Mus musculus OX=10090 GN=Uggt1 PE=1 SV=4	8	6.84324e+07	6.30198e+07	5.06928e+07	6.50993e+07	53704242	35762531	59970625	6.09217e+07	5.38687e+07
Q6P5F9	Exportin-1 OS=Mus musculus OX=10090 GN=Xpo1 PE=1 SV=1	5	83396338	6.21102e+07	5.14173e+07	55098600	32510420	4.49825e+07	6.70018e+07	5.74847e+07	5.28109e+07
Q6P6I6	DNA-directed RNA polymerase II subunit GRINL1A OS=Mus musculus OX=10090 GN=Polr2m PE=2 SV=2	1	7394764	5.45931e+06	987826				2.12137e+06	2.35377e+06	2.02221e+06
Q6P8I4	PEST proteolytic signal-containing nuclear protein OS=Mus musculus OX=10090 GN=Pcnp PE=1 SV=1	4	80026650	5.27881e+07	3.81411e+07	1.52246e+07	10260136	5407195	2.99401e+07	2.78952e+07	2.39318e+07
Q6P8X1	Sorting nexin-6 OS=Mus musculus OX=10090 GN=Snx6 PE=1 SV=2	3	1.64328e+07	16550126	1.15332e+07	4.70694e+06	2.38795e+06	5953503	11791529	1.76743e+07	6303683
Q6P9K8	Caskin-1 OS=Mus musculus OX=10090 GN=Caskin1 PE=1 SV=2	30	6.77916e+08	461784536	403869961	8.95642e+07	1.21908e+08	7.44949e+07	2.70102e+08	2.87759e+08	2.91641e+08
Q6P9K9	Neurexin-3 OS=Mus musculus OX=10090 GN=Nrxn3 PE=1 SV=2	12	278433522	2.47698e+08	1.83352e+08	2.71409e+08	3.08065e+08	255943166	276926227	2.5047e+08	2.65904e+08
Q6P9Q6	FK506-binding protein 15 OS=Mus musculus OX=10090 GN=Fkbp15 PE=1 SV=2	40	2188815897	2016523599	9.73412e+08	6.22257e+07	119941485	93741814	7.99429e+08	869753657	826578761
Q6P9R2	Serine/threonine-protein kinase OSR1 OS=Mus musculus OX=10090 GN=Oxsr1 PE=1 SV=1	3	32751071	2.53905e+07	15048228	1.33383e+07	6759358	11603295	17439416	20725456	19627915
Q6P9S0	MTSS1-like protein OS=Mus musculus OX=10090 GN=Mtss1l PE=1 SV=1	2	23855353	7.08705e+06	6.3553e+06	3.8076e+06	5.47096e+06	2.52433e+06		4209883
Q6PA06	Atlastin-2 OS=Mus musculus OX=10090 GN=Atl2 PE=1 SV=1	3	3.3525e+07	2.0503e+07	2.69143e+07	2.68728e+07	2.83386e+07	2.21612e+07	26973964	21187323	24450127
Q6PAJ1	Breakpoint cluster region protein OS=Mus musculus OX=10090 GN=Bcr PE=1 SV=3	15	182397128	1.43596e+08	84672175	7.16397e+07	6.90829e+07	5.11018e+07	9.51215e+07	9.94478e+07	1.04517e+08
Q6PAK3	Protein arginine N-methyltransferase 8 OS=Mus musculus OX=10090 GN=Prmt8 PE=1 SV=2	7	135749345	1.31458e+08	94428907	115161980	123380905	1.09253e+08	114967631	117106247	1.15222e+08
Q6PAR5	GTPase-activating protein and VPS9 domain-containing protein 1 OS=Mus musculus OX=10090 GN=Gapvd1 PE=1 SV=2	3	30873065	1.81342e+07	12793733	2.16374e+07	14788861	17834499	14911144	1.51001e+07	1.57955e+07
Q6PAV2	Probable E3 ubiquitin-protein ligase HERC4 OS=Mus musculus OX=10090 GN=Herc4 PE=1 SV=2	1	7.06069e+06	4352687	4601184	3.89548e+06	4137988	5.7337e+06	3.58221e+06	4023912	5.23971e+06
Q6PB44	Tyrosine-protein phosphatase non-receptor type 23 OS=Mus musculus OX=10090 GN=Ptpn23 PE=1 SV=2	7	81188174	67982587	7.87994e+07	5.147e+07	7.65744e+07	9.60889e+07	8.74825e+07	5.63104e+07	6.58575e+07
Q6PD24	Ankyrin repeat domain-containing protein 13D OS=Mus musculus OX=10090 GN=Ankrd13d PE=1 SV=2	1	8252418	6.32998e+06	2.7374e+06	4614176	7117964	4.00039e+06	5.05475e+06	4.22812e+06	5.12118e+06
Q6PD28	Serine/threonine-protein phosphatase 2A 56 kDa regulatory subunit beta isoform OS=Mus musculus OX=10090 GN=Ppp2r5b PE=1 SV=1	3	43104901	3.70774e+07	40039578	2.51282e+07	2.45469e+07	18574136	2.6017e+07	33043075	37927758
Q6PDI5	Proteasome adapter and scaffold protein ECM29 OS=Mus musculus OX=10090 GN=Ecpas PE=1 SV=3	7	62360908	35204116	3.42926e+07	1.71239e+07	7.97074e+06	1.30423e+07	3.7641e+07	38327725	2.61979e+07
Q6PDL0	Cytoplasmic dynein 1 light intermediate chain 2 OS=Mus musculus OX=10090 GN=Dync1li2 PE=1 SV=2	8	190130994	1.67161e+08	8.32629e+07	1.27704e+08	133804627	1.12171e+08	134322436	133420522	118430353
Q6PDM2	Serine/arginine-rich splicing factor 1 OS=Mus musculus OX=10090 GN=Srsf1 PE=1 SV=3	3	2.25427e+07	19965097	1.24159e+07	2.93478e+07	23879557	16712938	24534407	14712398	1.21422e+07
Q6PDQ2	Chromodomain-helicase-DNA-binding protein 4 OS=Mus musculus OX=10090 GN=Chd4 PE=1 SV=1	2	28956851	23550747	5196725	20543410	25273984	10002827	13249900	23476943	18945476
Q6PDS3	Sterile alpha and TIR motif-containing protein 1 OS=Mus musculus OX=10090 GN=Sarm1 PE=1 SV=1	3	1.06946e+07	8513876	2.71816e+07	28397515	1.38274e+07	33627081	8.76347e+06	13361401	7.39525e+06
Q6PDY2	2-aminoethanethiol dioxygenase OS=Mus musculus OX=10090 GN=Ado PE=1 SV=2	3	64667375	59543548	52883273	54916848	60592063	50231018	59001873	61846505	59782021
Q6PE01	U5 small nuclear ribonucleoprotein 40 kDa protein OS=Mus musculus OX=10090 GN=Snrnp40 PE=1 SV=1	1	7927184	8680597	8575351				4.25911e+06	9153473
Q6PE13	Proline-rich transmembrane protein 3 OS=Mus musculus OX=10090 GN=Prrt3 PE=1 SV=1	3	5.32878e+08	545571634	2.99884e+08	603492846	599075008	689421391	611053744	581026417	634446158
Q6PER3	Microtubule-associated protein RP/EB family member 3 OS=Mus musculus OX=10090 GN=Mapre3 PE=1 SV=1	11	364324357	2.67553e+08	1.5283e+08	2.32005e+08	2.03674e+08	1.92328e+08	230191027	2.10937e+08	2.19286e+08
Q6PEV3	WAS/WASL-interacting protein family member 2 OS=Mus musculus OX=10090 GN=Wipf2 PE=1 SV=1	2	23727342	18212054	7489591	2.62337e+06		6.0791e+06	4.50715e+06	10878603	8.50132e+06
Q6PF93	Phosphatidylinositol 3-kinase catalytic subunit type 3 OS=Mus musculus OX=10090 GN=Pik3c3 PE=1 SV=1	1	11752372		4907441	8152880			5.20767e+06		5.21748e+06
Q6PFD5	Disks large-associated protein 3 OS=Mus musculus OX=10090 GN=Dlgap3 PE=1 SV=1	25	1267221260	730426194	5.62431e+08	193749101	1.83101e+08	8.23581e+07	4.96703e+08	4.50707e+08	4.47e+08
Q6PFX8	N-acetylaspartylglutamate synthase A OS=Mus musculus OX=10090 GN=Rimkla PE=1 SV=1	4	6.1435e+07	128143614	86557129	3.90948e+06			34695874	3.8613e+07	4.5654e+07
Q6PGB6	N-alpha-acetyltransferase 50 OS=Mus musculus OX=10090 GN=Naa50 PE=1 SV=1	2	18869862	1.81285e+07	1.41866e+07	16917464	1.79542e+07	1.40324e+07	1.56624e+07	18070585	18310954
Q6PGC1	ATP-dependent RNA helicase DHX29 OS=Mus musculus OX=10090 GN=Dhx29 PE=1 SV=1	4	3.66004e+07	2.29211e+07	1.68938e+07		3246205	5.86055e+06	1.37808e+07	10844950	8.56659e+06
Q6PGF7	Exocyst complex component 8 OS=Mus musculus OX=10090 GN=Exoc8 PE=1 SV=1	2	1.72975e+07	1.30308e+07	13225637	8.27505e+06	14305478	6.87866e+06	1.03376e+07	11489856	9302303
Q6PGL7	WASH complex subunit 2 OS=Mus musculus OX=10090 GN=Washc2 PE=1 SV=1	150	76541992228	61912633913	31425214472	1876436232	9.52196e+08	1271455925	24946986140	25147260707	26106079366
Q6PGN3	Serine/threonine-protein kinase DCLK2 OS=Mus musculus OX=10090 GN=Dclk2 PE=1 SV=1	7	1.07371e+08	6.23204e+07	6.32023e+07	59653852	4.779e+07	5.07807e+07	5.33371e+07	5.79616e+07	6.60081e+07
Q6PHN9	Ras-related protein Rab-35 OS=Mus musculus OX=10090 GN=Rab35 PE=1 SV=1	10	163991761	1.54391e+08	1.26485e+08	1.37841e+08	1.62548e+08	132823843	132847051	147977973	1.36306e+08
Q6PHU5	Sortilin OS=Mus musculus OX=10090 GN=Sort1 PE=1 SV=1	4	3.94327e+07	3.32494e+07	28937356	2.78948e+07	19226595	25810143	3.09437e+07	22295302	3.34995e+07
Q6PHZ2	Calcium/calmodulin-dependent protein kinase type II subunit delta OS=Mus musculus OX=10090 GN=Camk2d PE=1 SV=1	9	6.07449e+08	804402788	346133956	654568088	693604527	445955365	5.56933e+08	572775428	597514264
Q6PIC6	Sodium/potassium-transporting ATPase subunit alpha-3 OS=Mus musculus OX=10090 GN=Atp1a3 PE=1 SV=1	68	28620636585	19845788507	15456072809	22075714984	22133702503	20694775283	20950334367	21264297585	21036143504
Q6PIE5	Sodium/potassium-transporting ATPase subunit alpha-2 OS=Mus musculus OX=10090 GN=Atp1a2 PE=1 SV=1	38	5385448032	4094324941	3084823296	4575582262	8091292600	3897866557	3863436185	6928632304	4125726799
Q6Q477	Plasma membrane calcium-transporting ATPase 4 OS=Mus musculus OX=10090 GN=Atp2b4 PE=1 SV=1	16	4.74321e+08	3.78669e+08	290309300	3.19563e+08	3.90903e+08	3.42159e+08	3.66778e+08	3.74622e+08	3.32594e+08
Q6R0H7	Guanine nucleotide-binding protein G(s) subunit alpha isoforms XLas OS=Mus musculus OX=10090 GN=Gnas PE=1 SV=1	9	1.62647e+08	1.29776e+08	1.49628e+08	108597884	1.19671e+08	99759443	1.29694e+08	1.22161e+08	126551179
Q6R891	Neurabin-2 OS=Mus musculus OX=10090 GN=Ppp1r9b PE=1 SV=1	4	8.99319e+07	46579680	26768212	1.47577e+07	1.82015e+07	2.2626e+07	25799671	2.87127e+07	4.04081e+07
Q6RHR9	Membrane-associated guanylate kinase, WW and PDZ domain-containing protein 1 OS=Mus musculus OX=10090 GN=Magi1 PE=1 SV=1	2	1.52124e+07	14536286	6.08218e+06	5.28952e+06			8531807	1.03034e+07	9426020
Q6TCG2	Membrane progesterone receptor epsilon OS=Mus musculus OX=10090 GN=Paqr9 PE=1 SV=2	1	3359217	3.99344e+06	3.5098e+06	3.68916e+06	4259037	3267991	3.98648e+06	3797268	4.22501e+06
Q6WQJ1	Sn1-specific diacylglycerol lipase alpha OS=Mus musculus OX=10090 GN=Dagla PE=1 SV=2	2	1.86808e+07	1.49391e+07	9.46334e+06	1.24207e+07	16014358	1.225e+07	1.19582e+07	13490239	14726051
Q6WVG3	BTB/POZ domain-containing protein KCTD12 OS=Mus musculus OX=10090 GN=Kctd12 PE=1 SV=1	12	3.68978e+08	3.09619e+08	2.47682e+08	334494586	314432289	2.77433e+08	2.82904e+08	3.07885e+08	2.78986e+08
Q6X893	Choline transporter-like protein 1 OS=Mus musculus OX=10090 GN=Slc44a1 PE=1 SV=3	2	2.42149e+07	2.89749e+07	40064318	28210705	40504260	2.2285e+07	35882582	2.9351e+07	29751937
Q6ZPE2	Myotubularin-related protein 5 OS=Mus musculus OX=10090 GN=Sbf1 PE=1 SV=2	19	2.02466e+08	1.61226e+08	1.57649e+08	1.67481e+08	1.80094e+08	1.41075e+08	1.64667e+08	170283256	1.61797e+08
Q6ZPF3	T-lymphoma invasion and metastasis-inducing protein 2 OS=Mus musculus OX=10090 GN=Tiam2 PE=1 SV=2	1	8.23798e+06	10107441	9032745	5500161	4.53718e+06	3.63862e+06	11913728	10380870	7688041
Q6ZPJ3	(E3-independent) E2 ubiquitin-conjugating enzyme UBE2O OS=Mus musculus OX=10090 GN=Ube2o PE=1 SV=3	18	3.73622e+08	2.80882e+08	2.79264e+08	2.92954e+08	3.59983e+08	2.67908e+08	2.73871e+08	3.04868e+08	298584049
Q6ZPQ6	Membrane-associated phosphatidylinositol transfer protein 2 OS=Mus musculus OX=10090 GN=Pitpnm2 PE=1 SV=2	8	1.01286e+08	89156803	9.57987e+07	6.46086e+07	7.01724e+07	7.22127e+07	7.12329e+07	75293208	53311713
Q6ZPU9	KIF1-binding protein OS=Mus musculus OX=10090 GN=Kif1bp PE=1 SV=2	3	72375116	55966254	49032592	55591002	58232957	5.33163e+07	49543983	55561591	63295510
Q6ZQ08	CCR4-NOT transcription complex subunit 1 OS=Mus musculus OX=10090 GN=Cnot1 PE=1 SV=2	8	63231024	4.23269e+07	3.96874e+07	11999247	10100665	21739217	3.76968e+07	25758823	4.26791e+07
Q6ZQ18	Protein EFR3 homolog B OS=Mus musculus OX=10090 GN=Efr3b PE=1 SV=2	6	7.03911e+07	6.13801e+07	4.66389e+07	5.16892e+07	5.42269e+07	48659341	55638140	4.68323e+07	5.52746e+07
Q6ZQ29	Serine/threonine-protein kinase TAO2 OS=Mus musculus OX=10090 GN=Taok2 PE=1 SV=3	1	8883470	5584870	4.29168e+06	5.23542e+06	6.30793e+06	4.5676e+06	6248800	5.17121e+06	4920001
Q6ZQ38	Cullin-associated NEDD8-dissociated protein 1 OS=Mus musculus OX=10090 GN=Cand1 PE=1 SV=2	29	1605612874	1323117012	9.1117e+08	1470601556	1541254274	1192151339	1225740404	1177602143	1253271188
Q6ZQ82	Rho GTPase-activating protein 26 OS=Mus musculus OX=10090 GN=Arhgap26 PE=1 SV=3	2	95425084	229219677	2100942509	479510446	3.38781e+08	992595920	743770667	740437648	735866736
Q6ZQI3	Malectin OS=Mus musculus OX=10090 GN=Mlec PE=1 SV=2	1	18735226	11611255	7.85079e+06	11231238	8.14054e+06	13527272	13570058	12434530	14670277
Q6ZQK5	Arf-GAP with coiled-coil, ANK repeat and PH domain-containing protein 2 OS=Mus musculus OX=10090 GN=Acap2 PE=1 SV=2	3	37600813	9410120	1.96734e+07	7.8253e+06	1.33865e+07	1.871e+07	1.47934e+07	1.65085e+07	10654191
Q6ZWN5	40S ribosomal protein S9 OS=Mus musculus OX=10090 GN=Rps9 PE=1 SV=3	2	37456391	30080419	17991607	34345136	58727448	39513428	46547823	41247212	4.61374e+07
Q6ZWR6	Nesprin-1 OS=Mus musculus OX=10090 GN=Syne1 PE=1 SV=2	2	33265714	25031656	14655855	24337866	24648244	16236545	18110288	20453740	20658542
Q6ZWU9	40S ribosomal protein S27 OS=Mus musculus OX=10090 GN=Rps27 PE=1 SV=3	2	56459296	49390702	3.49746e+07	39513817	49446380	34174149	43867955	37402454	46806461
Q6ZWV3	60S ribosomal protein L10 OS=Mus musculus OX=10090 GN=Rpl10 PE=1 SV=3	2	19881562	22735875	19953424	19859700	25652563	17404108	22201321	21798569	21999383
Q6ZWX6	Eukaryotic translation initiation factor 2 subunit 1 OS=Mus musculus OX=10090 GN=Eif2s1 PE=1 SV=3	13	367395027	346509533	2.15473e+08	277345726	330943333	2.81989e+08	332416637	331609581	348915826
Q71LX4	Talin-2 OS=Mus musculus OX=10090 GN=Tln2 PE=1 SV=3	30	2.81897e+08	2.59579e+08	2.46647e+08	2.6618e+08	2.67068e+08	254971114	2.48847e+08	2.66129e+08	2.66022e+08
Q76MZ3	Serine/threonine-protein phosphatase 2A 65 kDa regulatory subunit A alpha isoform OS=Mus musculus OX=10090 GN=Ppp2r1a PE=1 SV=3	20	1315822783	7.4921e+08	9.51243e+08	1250469008	1266260190	980227020	6.8939e+08	1034942020	1046584658
Q78IK4	MICOS complex subunit Mic27 OS=Mus musculus OX=10090 GN=Apool PE=1 SV=1	2	31872941	27370778	1.8623e+07	2.25621e+07	28321812	2.44288e+07	26416607	2.70212e+07	2.65268e+07
Q78JE5	F-box only protein 22 OS=Mus musculus OX=10090 GN=Fbxo22 PE=1 SV=2	2	18164486	14518089	8.30644e+06	7715632	12653377		7.77816e+06	7.80549e+06	9093452
Q78JW9	Ubiquitin domain-containing protein UBFD1 OS=Mus musculus OX=10090 GN=Ubfd1 PE=1 SV=2	3	60823299	52570579	27133229	1.36625e+07	3.59129e+06	1.18523e+07	2.70719e+07	2.82463e+07	2.89579e+07
Q78PG9	Coiled-coil domain-containing protein 25 OS=Mus musculus OX=10090 GN=Ccdc25 PE=1 SV=1	1	5409983	4637879	4.60647e+06	4400896	5.19792e+06	3.29133e+06	5279344	4948081	4.84582e+06
Q78ZA7	Nucleosome assembly protein 1-like 4 OS=Mus musculus OX=10090 GN=Nap1l4 PE=1 SV=1	9	370972162	2.52958e+08	1.26696e+08	42308015	3.68167e+07	2.98618e+07	133226180	138388652	1.42449e+08
Q7M6Y3	Phosphatidylinositol-binding clathrin assembly protein OS=Mus musculus OX=10090 GN=Picalm PE=1 SV=1	4	98694422	71646400	53058984	2.60687e+07	2.28184e+07	3670055	27311551	42557021	4.20256e+07
Q7M750	Opalin OS=Mus musculus OX=10090 GN=Opalin PE=1 SV=1	2	13470250	13299631	9715957	32370896	34715129	2.51094e+07	32825804	18976065	21963849
Q7TMB8	Cytoplasmic FMR1-interacting protein 1 OS=Mus musculus OX=10090 GN=Cyfip1 PE=1 SV=1	10	130120433	1.0744e+08	1.01646e+08	1.09578e+08	1.44586e+08	115637715	102420940	1.25435e+08	122367456
Q7TMC8	L-fucose kinase OS=Mus musculus OX=10090 GN=Fuk PE=1 SV=1	2	1.40788e+07	9.81604e+06	12176288	13348975	4.52188e+06	1.22024e+07	1.16965e+07	1.48296e+07	1.32842e+07
Q7TME0	Phospholipid phosphatase-related protein type 4 OS=Mus musculus OX=10090 GN=Plppr4 PE=1 SV=2	21	609462993	4.62966e+08	3.29577e+08	2.26543e+08	2.79156e+08	2.38653e+08	3.32014e+08	3.22743e+08	3.44277e+08
Q7TMK9	Heterogeneous nuclear ribonucleoprotein Q OS=Mus musculus OX=10090 GN=Syncrip PE=1 SV=2	9	226966788	2.36986e+08	1.60017e+08	52518122	6.96885e+07	3.66759e+07	1.00573e+08	98124623	1.52478e+08
Q7TMM9	Tubulin beta-2A chain OS=Mus musculus OX=10090 GN=Tubb2a PE=1 SV=1	17	28517640854	26895315880	22421996874	25961092203	27269242666	23735492906	25096297375	25747189796	24857129698
Q7TMQ7	WD repeat-containing protein 91 OS=Mus musculus OX=10090 GN=Wdr91 PE=1 SV=1	2	10026588	9.90715e+06	7.52974e+06	6.40315e+06	6.04223e+06	3.18158e+06	6.92211e+06	7.92159e+06	7.00151e+06
Q7TMY8	E3 ubiquitin-protein ligase HUWE1 OS=Mus musculus OX=10090 GN=Huwe1 PE=1 SV=5	20	1.40815e+08	1.42597e+08	1.09985e+08	1.66714e+08	180389472	167109936	1.5413e+08	1.61837e+08	1.53374e+08
Q7TN29	Stromal membrane-associated protein 2 OS=Mus musculus OX=10090 GN=Smap2 PE=1 SV=1	5	100441171	75814557	48366885	31992566	28287187	4.04566e+07	6.31847e+07	4.14607e+07	4.98502e+07
Q7TN99	Cytoplasmic polyadenylation element-binding protein 3 OS=Mus musculus OX=10090 GN=Cpeb3 PE=1 SV=1	5	142297103	1.74256e+08	125089418	1.66879e+08	2.0738e+08	1.43932e+08	156898396	1.45455e+08	1.62472e+08
Q7TNG5	Echinoderm microtubule-associated protein-like 2 OS=Mus musculus OX=10090 GN=Eml2 PE=1 SV=1	8	1.57822e+08	1.48569e+08	133173138	1.44407e+08	1.28727e+08	126439513	109268374	118114755	93074461
Q7TNM2	Tripartite motif-containing protein 46 OS=Mus musculus OX=10090 GN=Trim46 PE=1 SV=1	1	8904046	8327568	7407274	8635950	6.44968e+06	6.20275e+06	7.58222e+06	8678771	9396051
Q7TPB0	Phospholipid phosphatase-related protein type 3 OS=Mus musculus OX=10090 GN=Plppr3 PE=1 SV=1	9	9.19537e+07	9.99408e+07	75923128	70791492	8.74252e+07	8.09446e+07	94996882	1.24206e+08	1.42182e+08
Q7TPD3	Roundabout homolog 2 OS=Mus musculus OX=10090 GN=Robo2 PE=1 SV=2	3	1.79844e+07	1.9397e+07	1.41429e+07	22147734	16469237	1.37492e+07	1.71233e+07	1.43796e+07	1.63622e+07
Q7TPM6	Fibronectin type III and SPRY domain-containing protein 1 OS=Mus musculus OX=10090 GN=Fsd1 PE=1 SV=1	11	155933131	89545218	8.53278e+07	105066607	1.06958e+08	1.01286e+08	104328701	1.07586e+08	1.06081e+08
Q7TPR4	Alpha-actinin-1 OS=Mus musculus OX=10090 GN=Actn1 PE=1 SV=1	21	4.58658e+08	3.55649e+08	2.98398e+08	2.98441e+08	2.88949e+08	2.52418e+08	3.49562e+08	3.10733e+08	2.85713e+08
Q7TQ95	Endoplasmic reticulum junction formation protein lunapark OS=Mus musculus OX=10090 GN=Lnpk PE=1 SV=1	1	29280614	50858884	8417061	48324084	62881468	61986948	46037976	44303744	42801788
Q7TQD2	Tubulin polymerization-promoting protein OS=Mus musculus OX=10090 GN=Tppp PE=1 SV=1	17	1970297146	1204124766	9.92543e+08	3.64438e+08	3.53287e+08	2.23842e+08	861479853	7.68853e+08	8.77497e+08
Q7TQF7	Amphiphysin OS=Mus musculus OX=10090 GN=Amph PE=1 SV=1	16	498185478	276455453	2.13602e+08	6.58533e+07	62351358	6.35673e+07	1.74363e+08	1.81487e+08	1.82227e+08
Q7TQH0	Ataxin-2-like protein OS=Mus musculus OX=10090 GN=Atxn2l PE=1 SV=1	6	1.17984e+08	9.84716e+07	6.32948e+07	3.31164e+07	3.3188e+07	2.74589e+07	46223251	6.31407e+07	60649306
Q7TQI3	Ubiquitin thioesterase OTUB1 OS=Mus musculus OX=10090 GN=Otub1 PE=1 SV=2	10	930442006	8.90856e+08	6.88717e+08	8.38568e+08	919987532	735059922	807790896	6.91361e+08	8.06601e+08
Q7TQK5	Coiled-coil domain-containing protein 93 OS=Mus musculus OX=10090 GN=Ccdc93 PE=1 SV=1	45	2834782359	2446954535	1530621234	7.66158e+07	7.49767e+07	6.71481e+07	1034755005	1017933646	1052342702
Q7TSC1	Protein PRRC2A OS=Mus musculus OX=10090 GN=Prrc2a PE=1 SV=1	5	83098428	4.86794e+07	3.93281e+07	1.14269e+07	1.56768e+07	6.32439e+06	27895321	2.91108e+07	2.92261e+07
Q7TSF1	Desmoglein-1-beta OS=Mus musculus OX=10090 GN=Dsg1b PE=1 SV=1	2	15229738	1.4752e+07	10832064	1.35588e+07	19343974	23792465	1.69745e+07	19870294	16495002
Q7TSI3	Serine/threonine-protein phosphatase 6 regulatory subunit 1 OS=Mus musculus OX=10090 GN=Ppp6r1 PE=1 SV=1	3	3.30887e+07	17417048	6.10621e+06	7.55611e+06	7.86194e+06	4172122	11890220	11952987	13165144
Q7TSJ2	Microtubule-associated protein 6 OS=Mus musculus OX=10090 GN=Map6 PE=1 SV=2	70	4770785662	3810649118	1823327473	1621463605	1822731352	1254396959	2414328415	2399613635	2388828655
Q7TSV4	Phosphoglucomutase-2 OS=Mus musculus OX=10090 GN=Pgm2 PE=1 SV=1	3	38821598	29507203	21259095	27025850	36107962	23879917	2.5473e+07	27915662	3.09689e+07
Q7TSY6	CUGBP Elav-like family member 4 OS=Mus musculus OX=10090 GN=Celf4 PE=1 SV=2	2	3.94673e+07	26924218	1.43201e+07			6187665	18249177	1.84165e+07	11406878
Q7TT37	Elongator complex protein 1 OS=Mus musculus OX=10090 GN=Elp1 PE=1 SV=2	5	3.78198e+07	3.44782e+07	2.69982e+07	4.69047e+07	29550131	1.11e+08	3.18244e+07	2.86484e+07	1.202e+08
Q7TT50	Serine/threonine-protein kinase MRCK beta OS=Mus musculus OX=10090 GN=Cdc42bpb PE=1 SV=2	15	1.63672e+08	169519208	1.28808e+08	1.46184e+08	1.72511e+08	1.44071e+08	1.32849e+08	1.69987e+08	1.26345e+08
Q80SW1	S-adenosylhomocysteine hydrolase-like protein 1 OS=Mus musculus OX=10090 GN=Ahcyl1 PE=1 SV=1	24	2756533408	2465418243	2005802045	2595086529	2561013635	2217601546	2315353163	2435626815	2476931283
Q80T41	Gamma-aminobutyric acid type B receptor subunit 2 OS=Mus musculus OX=10090 GN=Gabbr2 PE=1 SV=2	13	171181009	1.48501e+08	1.07212e+08	1.36918e+08	1.45972e+08	125218529	142992158	146692442	1.4399e+08
Q80TB8	Synaptic vesicle membrane protein VAT-1 homolog-like OS=Mus musculus OX=10090 GN=Vat1l PE=1 SV=2	10	231836215	178872837	160046971	1.65302e+08	1.24318e+08	1.38216e+08	1.43247e+08	1.60367e+08	172496100
Q80TE7	Leucine-rich repeat-containing protein 7 OS=Mus musculus OX=10090 GN=Lrrc7 PE=1 SV=2	79	5956384122	3564436606	2039037359	7.23106e+08	5.98807e+08	3.66619e+08	1938995762	2041035433	2014674622
Q80TJ1	Calcium-dependent secretion activator 1 OS=Mus musculus OX=10090 GN=Cadps PE=1 SV=3	37	8512854128	5460406330	4459321605	1606608872	1577626869	1365108439	3616391139	3566011353	3734403122
Q80TK0	Uncharacterized protein KIAA1107 OS=Mus musculus OX=10090 GN=Kiaa1107 PE=1 SV=5	8	8.69342e+07	6.5857e+07	3.40464e+07	2.41887e+07	2.29668e+07	1.1469e+07	3.74767e+07	38050936	3.70422e+07
Q80TL0	Protein phosphatase 1E OS=Mus musculus OX=10090 GN=Ppm1e PE=1 SV=2	10	272054617	272241633	2.06702e+08	279240635	2.89324e+08	242973435	2.21997e+08	244201355	2.35474e+08
Q80TL4	PHD finger protein 24 OS=Mus musculus OX=10090 GN=Phf24 PE=1 SV=2	7	217897185	200459929	1.23635e+08	1.61081e+08	199948457	1.41418e+08	138174222	1.54341e+08	138487005
Q80TL7	Protein MON2 homolog OS=Mus musculus OX=10090 GN=Mon2 PE=1 SV=2	5	34431295	1.62246e+07	2.19621e+07	1.8778e+07	2.16522e+07	33723490	2.63284e+07	16579206	2.36233e+07
Q80TM9	Nischarin OS=Mus musculus OX=10090 GN=Nisch PE=1 SV=2	4	4.31287e+07	3.42144e+07	2.89447e+07	1.49985e+07	13286660	2.43384e+07	30437168	2.52272e+07	2.74178e+07
Q80TQ2	Ubiquitin carboxyl-terminal hydrolase CYLD OS=Mus musculus OX=10090 GN=Cyld PE=1 SV=2	6	81672139	7.45313e+07	53719796	2.46885e+07	2.74361e+07	2.31884e+07	4.14145e+07	5.38847e+07	46286684
Q80TR1	Adhesion G protein-coupled receptor L1 OS=Mus musculus OX=10090 GN=Adgrl1 PE=1 SV=2	12	134060775	164511555	1.54292e+08	176618930	1.65163e+08	1.58558e+08	1.62029e+08	1.50118e+08	170314709
Q80TS3	Adhesion G protein-coupled receptor L3 OS=Mus musculus OX=10090 GN=Adgrl3 PE=1 SV=3	7	88005583	65327592	5.0108e+07	6.56797e+07	6.78594e+07	5.71686e+07	6.52497e+07	7.15483e+07	6.73194e+07
Q80TV8	CLIP-associating protein 1 OS=Mus musculus OX=10090 GN=Clasp1 PE=1 SV=2	6	34333071	1.81922e+07	22074953	4.73912e+06	12609491	7266219	1.79782e+07	9.37375e+06	1.49374e+07
Q80TZ3	Putative tyrosine-protein phosphatase auxilin OS=Mus musculus OX=10090 GN=Dnajc6 PE=1 SV=2	25	1112030914	955688264	7.78687e+08	6.76995e+08	7.56631e+08	735727277	797146866	8.12551e+08	7.92206e+08
Q80U23	Syntaphilin OS=Mus musculus OX=10090 GN=Snph PE=1 SV=3	3	36286068	3.29372e+07	17150228	12604093	18794614	3.11576e+07	29472520	2.07667e+07	10718963
Q80U28	MAP kinase-activating death domain protein OS=Mus musculus OX=10090 GN=Madd PE=1 SV=2	22	4.08778e+08	317750091	2.53348e+08	287247855	3.4142e+08	237796342	2.78465e+08	2.79436e+08	286198174
Q80U40	RIMS-binding protein 2 OS=Mus musculus OX=10090 GN=Rimbp2 PE=1 SV=3	1			2.51062e+06		5.4877e+06		3.1481e+06		2594320
Q80U49	Centrosomal protein of 170 kDa protein B OS=Mus musculus OX=10090 GN=Cep170b PE=1 SV=2	6	6.28315e+07	4.21114e+07	2.08891e+07	8.46523e+06	32188236	1.43415e+07	23318216	3.20735e+07	2.53206e+07
Q80U56	Late secretory pathway protein AVL9 homolog OS=Mus musculus OX=10090 GN=Avl9 PE=1 SV=2	5	5.88794e+07	43090646	4.31625e+07	3.34955e+07	46040236	2.64307e+07	41855009	3.39409e+07	44358236
Q80UG2	Plexin-A4 OS=Mus musculus OX=10090 GN=Plxna4 PE=1 SV=3	32	6.54142e+08	5.19152e+08	5.6613e+08	6.18746e+08	580220397	5.1288e+08	5.84947e+08	5.52867e+08	547128140
Q80UG5	Septin-9 OS=Mus musculus OX=10090 GN=Sept9 PE=1 SV=1	15	2.34576e+08	2.01461e+08	2.17147e+08	1.89593e+08	2.03916e+08	185704039	2.53939e+08	2.10653e+08	2.0935e+08
Q80UJ7	Rab3 GTPase-activating protein catalytic subunit OS=Mus musculus OX=10090 GN=Rab3gap1 PE=1 SV=4	12	224114586	2.00779e+08	177331696	1.95923e+08	223441346	1.53652e+08	1.75974e+08	1.98353e+08	173957237
Q80UK0	SEC14 domain and spectrin repeat-containing protein 1 OS=Mus musculus OX=10090 GN=Sestd1 PE=1 SV=1	4	148037690	116692718	91098983	1.02691e+08	9.27852e+07	8.95779e+07	1.09835e+08	1.03067e+08	130123703
Q80UM3	N-alpha-acetyltransferase 15, NatA auxiliary subunit OS=Mus musculus OX=10090 GN=Naa15 PE=1 SV=1	1	4243318	3.37457e+06	4.22329e+06	3283047	3.7922e+06	3748113	3.90253e+06	3714110	3.93994e+06
Q80UM7	Mannosyl-oligosaccharide glucosidase OS=Mus musculus OX=10090 GN=Mogs PE=1 SV=1	3	76730453	71602551	4.6789e+07	11554234	279412094	9713958	92905686	51958334	12065405
Q80UP3	Diacylglycerol kinase zeta OS=Mus musculus OX=10090 GN=Dgkz PE=1 SV=2	4	35247630		15191669	4.15164e+06		12746452	1.70349e+07	10595778	39578341
Q80UP8	Sodium-dependent phosphate transporter 2 OS=Mus musculus OX=10090 GN=Slc20a2 PE=1 SV=2	1	2.74242e+06		1.06211e+06	3.1786e+06	2.8497e+06	2.039e+06	2.22928e+06		1.4386e+06
Q80UU9	Membrane-associated progesterone receptor component 2 OS=Mus musculus OX=10090 GN=Pgrmc2 PE=1 SV=2	2	1.62159e+07	15592766	1.53341e+07	1.53991e+07	1.58847e+07	20794214	1.79537e+07	1.74963e+07	1.80836e+07
Q80UW2	F-box only protein 2 OS=Mus musculus OX=10090 GN=Fbxo2 PE=1 SV=1	2	25871797	18439482	1.40223e+07	17916534	23864455	14495693	19673440	1.80784e+07	1.59999e+07
Q80VC9	Calmodulin-regulated spectrin-associated protein 3 OS=Mus musculus OX=10090 GN=Camsap3 PE=1 SV=1	10	1.43423e+08	9.66003e+07	9.28427e+07	4.37453e+07	5.25558e+07	4.85927e+07	5.2815e+07	6.78917e+07	7.49885e+07
Q80VP0	Tectonin beta-propeller repeat-containing protein 1 OS=Mus musculus OX=10090 GN=Tecpr1 PE=1 SV=1	10	1.15256e+08	9.82825e+07	7.37743e+07	8.55024e+07	1.04305e+08	9.71723e+07	1.00876e+08	7.56309e+07	1.0127e+08
Q80VP1	Epsin-1 OS=Mus musculus OX=10090 GN=Epn1 PE=1 SV=3	2	32775711	2.36219e+07	8.29925e+06		2.56565e+06		1.60261e+07	11267814	7.24429e+06
Q80VP9	Aspartate beta-hydroxylase domain-containing protein 2 OS=Mus musculus OX=10090 GN=Asphd2 PE=1 SV=1	1	4826986	2178174	3160183		4036445		3986315	3.03859e+06	4.18737e+06
Q80W47	WD repeat domain phosphoinositide-interacting protein 2 OS=Mus musculus OX=10090 GN=Wipi2 PE=1 SV=1	4	118828712	1.08018e+08	327424299	1.20094e+08	1.24419e+08	1.06758e+08	49266525	476352654	109450112
Q80W54	CAAX prenyl protease 1 homolog OS=Mus musculus OX=10090 GN=Zmpste24 PE=1 SV=2	1						1.56625e+06
Q80WC7	Arf-GAP domain and FG repeat-containing protein 2 OS=Mus musculus OX=10090 GN=Agfg2 PE=1 SV=1	1	3.74101e+06	4.28934e+06		1.96583e+06		4.70509e+06	3992876
Q80WG5	Volume-regulated anion channel subunit LRRC8A OS=Mus musculus OX=10090 GN=Lrrc8a PE=1 SV=1	1	8.0446e+06	4.50496e+06	8896704			22516736			15571719
Q80WJ7	Protein LYRIC OS=Mus musculus OX=10090 GN=Mtdh PE=1 SV=1	2	1.40283e+07	9086545	1.15203e+07	3.70017e+06	626887	6235883	7.60924e+06	6.69863e+06	6509571
Q80WM4	Hyaluronan and proteoglycan link protein 4 OS=Mus musculus OX=10090 GN=Hapln4 PE=2 SV=2	1	3.97901e+07	52650504	22554015	48037750	66817794	4.03419e+07	43403788	47418458	46150509
Q80WQ2	Protein VAC14 homolog OS=Mus musculus OX=10090 GN=Vac14 PE=1 SV=1	1	7872313	6946166	4.50764e+06	5066169	6.05671e+06	2.92567e+06	8241705	6735176	5718580
Q80X50	Ubiquitin-associated protein 2-like OS=Mus musculus OX=10090 GN=Ubap2l PE=1 SV=1	17	6.21969e+08	432441205	2.01278e+08	1.85746e+07	2.47131e+07	13419371	1.85473e+08	2.02076e+08	2.1998e+08
Q80X80	Phospholipid transfer protein C2CD2L OS=Mus musculus OX=10090 GN=C2cd2l PE=1 SV=3	3	35544037	19149412	10119053	1.3514e+07	1.42994e+07	11136625	14160759	1.60936e+07	1.54044e+07
Q80X95	Ras-related GTP-binding protein A OS=Mus musculus OX=10090 GN=Rraga PE=1 SV=1	4	77150667	7.15913e+07	48188696	64000376	75603069	5.20196e+07	49131199	58825517	5.67341e+07
Q80XA6	RalBP1-associated Eps domain-containing protein 2 OS=Mus musculus OX=10090 GN=Reps2 PE=1 SV=1	1	6247525	4265801							3.09535e+06
Q80XI3	Eukaryotic translation initiation factor 4 gamma 3 OS=Mus musculus OX=10090 GN=Eif4g3 PE=1 SV=2	52	2831368966	1955571070	1364736920	2.76772e+08	2.63126e+08	1.83502e+08	1000523510	1007677098	1049196705
Q80XI4	Phosphatidylinositol 5-phosphate 4-kinase type-2 beta OS=Mus musculus OX=10090 GN=Pip4k2b PE=1 SV=1	12	3.37723e+08	2.80783e+08	218797127	2.68512e+08	282980724	2.18795e+08	2.54185e+08	266929597	2.62573e+08
Q80XK6	Autophagy-related protein 2 homolog B OS=Mus musculus OX=10090 GN=Atg2b PE=1 SV=3	5	5.9257e+07	3.33835e+07	1.29004e+07	8840549	2.8117e+06	5363138	1.63738e+07	1.73463e+07	1.52213e+07
Q80XQ2	TBC1 domain family member 5 OS=Mus musculus OX=10090 GN=Tbc1d5 PE=1 SV=2	13	388151707	2.78456e+08	231037314	2.71432e+07	2.46026e+07	2.60343e+07	126420525	1.50071e+08	1.29708e+08
Q80XR2	Calcium-transporting ATPase type 2C member 1 OS=Mus musculus OX=10090 GN=Atp2c1 PE=1 SV=2	1	6.45543e+06		2.69137e+06	4862752	2.18852e+06	2.78063e+06	3.85641e+06	3.42849e+06	4.41819e+06
Q80Y17	Lethal(2) giant larvae protein homolog 1 OS=Mus musculus OX=10090 GN=Llgl1 PE=1 SV=1	14	2.6924e+08	2.30774e+08	250053483	215065833	2.48125e+08	2.14278e+08	239014787	2.46666e+08	2.36975e+08
Q80Y24	Prickle-like protein 2 OS=Mus musculus OX=10090 GN=Prickle2 PE=1 SV=3	4	57279750	2.56764e+07	22607424	8.92296e+06	2.18259e+06	976010	1.52959e+07	2.06265e+07	2.53776e+07
Q80Y55	BSD domain-containing protein 1 OS=Mus musculus OX=10090 GN=Bsdc1 PE=1 SV=1	2	16590366	6.81616e+06	4.52825e+06	2.66291e+06	1.42729e+06		5.5996e+06	2.73476e+06	5.44515e+06
Q80Y56	Rabenosyn-5 OS=Mus musculus OX=10090 GN=Rbsn PE=1 SV=1	29	1545343353	8.18344e+08	4.94099e+08	2.60099e+07	3.84745e+07	8.93323e+06	3.97629e+08	3.72564e+08	4.34281e+08
Q80YA9	Connector enhancer of kinase suppressor of ras 2 OS=Mus musculus OX=10090 GN=Cnksr2 PE=1 SV=1	16	5.60125e+08	3.20469e+08	2.93984e+08	9.08827e+07	68276744	102771888	2.04898e+08	2.07365e+08	2.15462e+08
Q80YE4	Serine/threonine-protein kinase LMTK1 OS=Mus musculus OX=10090 GN=Aatk PE=1 SV=1	3	1.78999e+07	5.06416e+06	3.78461e+06		11550834		6.29353e+06
Q80YN3	Breast carcinoma-amplified sequence 1 homolog OS=Mus musculus OX=10090 GN=Bcas1 PE=1 SV=3	11	331111239	2.59474e+08	1.16141e+08	2.5998e+08	2.82884e+08	162723012	231353445	2.27748e+08	2.36455e+08
Q80YX1	Tenascin OS=Mus musculus OX=10090 GN=Tnc PE=1 SV=1	20	6.80818e+08	6.59972e+08	649922579	5.89136e+08	6.50921e+08	7.54849e+08	6.47015e+08	680848411	6.86118e+08
Q80Z24	Neuronal growth regulator 1 OS=Mus musculus OX=10090 GN=Negr1 PE=1 SV=1	2	49435748	42087479	30054897	26913936	3.19114e+07	26455174	33859325	34650871	3.39333e+07
Q80Z38	SH3 and multiple ankyrin repeat domains protein 2 OS=Mus musculus OX=10090 GN=Shank2 PE=1 SV=2	54	2675916665	1611940503	1174267401	3.29048e+08	4.30379e+08	3.26527e+08	980662048	9.33168e+08	932139886
Q80ZF8	Adhesion G protein-coupled receptor B3 OS=Mus musculus OX=10090 GN=Adgrb3 PE=1 SV=2	5	71441435	1.66704e+08	40187532	133315790	2.99267e+08	1.2438e+07	28320240	1.20309e+08	1.41229e+08
Q80ZJ1	Ras-related protein Rap-2a OS=Mus musculus OX=10090 GN=Rap2a PE=1 SV=2	8	1.31067e+08	1.12353e+08	76556324	1.07619e+08	1.19168e+08	99565136	9.846e+07	8.88222e+07	90147848
Q80ZJ6	Protein zer-1 homolog OS=Mus musculus OX=10090 GN=Zer1 PE=1 SV=1	2	1.62751e+07	6812310	1.26402e+07	1.02678e+07	5676168	9804146	11017974	1.22897e+07	1.59195e+07
Q80ZW2	Protein THEM6 OS=Mus musculus OX=10090 GN=Them6 PE=1 SV=1	1	13087605	9123420	9034463	14720968	10357967	8614533	9725675	11759433	11201404
Q810B6	Rabankyrin-5 OS=Mus musculus OX=10090 GN=Ankfy1 PE=1 SV=2	6	5.59082e+07	54352213	3.42092e+07	3.83636e+07	43066627	3.89084e+07	3.73902e+07	5.52966e+07	4.44212e+07
Q810B7	SLIT and NTRK-like protein 5 OS=Mus musculus OX=10090 GN=Slitrk5 PE=2 SV=1	9	1.26502e+08	8.05995e+07	3.03027e+07	1.82081e+07	5764691	2.59192e+06	4.55172e+07	2.13828e+07	3.39129e+07
Q810U3	Neurofascin OS=Mus musculus OX=10090 GN=Nfasc PE=1 SV=1	25	7.51185e+08	566422903	4.90399e+08	674262189	692425180	622176698	567553765	6.03034e+08	6.08084e+08
Q810U4	Neuronal cell adhesion molecule OS=Mus musculus OX=10090 GN=Nrcam PE=1 SV=2	14	3.93298e+08	4.1537e+08	2.33468e+08	462402302	4.89391e+08	3.5331e+08	3.66226e+08	3.95356e+08	357350793
Q811D0	Disks large homolog 1 OS=Mus musculus OX=10090 GN=Dlg1 PE=1 SV=1	12	232381561	1.12164e+08	1.00271e+08	74151957	5.12696e+07	5.56504e+07	1.08349e+08	9.15363e+07	1.08321e+08
Q811I0	ATP synthase mitochondrial F1 complex assembly factor 1 OS=Mus musculus OX=10090 GN=Atpaf1 PE=1 SV=1	1	4.52183e+06	2.91044e+06		2.79688e+06		2.64406e+06	2.72211e+06	3.6134e+06	3.35296e+06
Q811P8	Rho GTPase-activating protein 32 OS=Mus musculus OX=10090 GN=Arhgap32 PE=1 SV=2	15	1.61158e+08	1.34813e+08	8.85429e+07	49216085	4.92177e+07	3.99212e+07	72651980	85561433	8.7103e+07
Q811S7	Upstream-binding protein 1 OS=Mus musculus OX=10090 GN=Ubp1 PE=1 SV=1	1	26600658		7622054	13336395	19439484	7.9183e+06	5156764	5401966	4797964
Q812A2	SLIT-ROBO Rho GTPase-activating protein 3 OS=Mus musculus OX=10090 GN=Srgap3 PE=1 SV=1	15	2.32204e+08	186385978	1.0458e+08	5.64943e+07	43914629	3.22215e+07	9.27324e+07	94880365	8.85082e+07
Q8BFQ4	WD repeat-containing protein 82 OS=Mus musculus OX=10090 GN=Wdr82 PE=1 SV=1	4	7.37727e+07	4.97268e+07	5.70571e+07	4.74704e+07	47218218	43247667	5.14772e+07	5.02284e+07	3.70299e+07
Q8BFQ8	Glutamine amidotransferase-like class 1 domain-containing protein 1 OS=Mus musculus OX=10090 GN=Gatd1 PE=1 SV=1	4	59519370	4.48964e+07	2.2437e+07	48247423	4.14423e+07	34900387	51772959	45181314	45049802
Q8BFT9	Synaptic vesicle 2-related protein OS=Mus musculus OX=10090 GN=Svop PE=1 SV=1	1	9699933	6.12323e+06	5.5113e+06	6024431		6346180	9067533	4199330	7.54462e+06
Q8BFU3	RING finger protein 214 OS=Mus musculus OX=10090 GN=Rnf214 PE=1 SV=1	9	702281379	5.54004e+08	333838206	4.98201e+08	4.71089e+08	3.89367e+08	4.62281e+08	4.4762e+08	4.72989e+08
Q8BFY9	Transportin-1 OS=Mus musculus OX=10090 GN=Tnpo1 PE=1 SV=2	1	11564290	7.55253e+06	10214230			6574448	9992127	7.70429e+06	7.91036e+06
Q8BFZ2	Phospholipid phosphatase-related protein type 1 OS=Mus musculus OX=10090 GN=Plppr1 PE=1 SV=1	2	22190211	2.1779e+07	1.65178e+07	2.17216e+07	2.44443e+07	1.47998e+07	21927133	18955749	2.08852e+07
Q8BG05	Heterogeneous nuclear ribonucleoprotein A3 OS=Mus musculus OX=10090 GN=Hnrnpa3 PE=1 SV=1	14	7.04927e+08	6.09773e+08	4.46347e+08	4.83593e+08	5.41833e+08	5.28681e+08	5.51569e+08	5.19319e+08	5.43042e+08
Q8BG32	26S proteasome non-ATPase regulatory subunit 11 OS=Mus musculus OX=10090 GN=Psmd11 PE=1 SV=3	1	6398152	5654959	5.83245e+06	3.83027e+06	4.06146e+06	3762575	5440945	4929403	4444402
Q8BG39	Synaptic vesicle glycoprotein 2B OS=Mus musculus OX=10090 GN=Sv2b PE=1 SV=1	13	635333138	531794002	3.79659e+08	664544579	682384158	535706678	6.09699e+08	691459778	695151988
Q8BG40	Katanin p80 WD40 repeat-containing subunit B1 OS=Mus musculus OX=10090 GN=Katnb1 PE=1 SV=1	2	28283161	2.60033e+07	3.09722e+07	1.73435e+07	1.02636e+07	1.7899e+07	17786714	8.81538e+06	1.63194e+07
Q8BG89	Protein ZNF365 OS=Mus musculus OX=10090 GN=Znf365 PE=1 SV=1	1	10941739	5.41519e+06						3.82299e+06	3.83884e+06
Q8BGB7	Enolase-phosphatase E1 OS=Mus musculus OX=10090 GN=Enoph1 PE=1 SV=1	2	30975512	2.33017e+07	1.28546e+07	23743666	23523734	2.29373e+07	24480742	2.0787e+07	2.24986e+07
Q8BGC4	Prostaglandin reductase-3 OS=Mus musculus OX=10090 GN=Zadh2 PE=1 SV=1	4	88854437	6.69353e+07	44848028	19741885	1.05512e+08	8.67392e+07	5.33674e+07	8.40756e+07	7.58698e+07
Q8BGD9	Eukaryotic translation initiation factor 4B OS=Mus musculus OX=10090 GN=Eif4b PE=1 SV=1	21	9.24242e+08	6.23049e+08	3.22288e+08	7.14546e+07	7.31176e+07	5.93625e+07	3.26433e+08	3.22186e+08	3.41471e+08
Q8BGH7	CDC42 small effector protein 2 OS=Mus musculus OX=10090 GN=Cdc42se2 PE=1 SV=1	2	20099564	27598522	11863914	2.00267e+07	20011222	18084255	22396574	21426603	21722815
Q8BGQ7	Alanine--tRNA ligase, cytoplasmic OS=Mus musculus OX=10090 GN=Aars PE=1 SV=1	22	487542436	5.14416e+08	454316664	4.39298e+08	4.50268e+08	4.24221e+08	475277455	4.69274e+08	457547536
Q8BGR6	ADP-ribosylation factor-like protein 15 OS=Mus musculus OX=10090 GN=Arl15 PE=1 SV=1	1	5653243		5199495	5599908	7.16767e+06	6901875
Q8BGT8	Phytanoyl-CoA hydroxylase-interacting protein-like OS=Mus musculus OX=10090 GN=Phyhipl PE=1 SV=1	15	1262261241	1086619619	877548922	1117123521	1137305369	9.95996e+08	1136591145	1073487234	1121681734
Q8BGU5	Cyclin-Y OS=Mus musculus OX=10090 GN=Ccny PE=1 SV=1	2	17645410	1.30039e+07	1.36972e+07	1.45806e+07	17793661	4523846	18788925	1.67386e+07	5.87343e+06
Q8BGX2	Mitochondrial import inner membrane translocase subunit Tim29 OS=Mus musculus OX=10090 GN=Timm29 PE=1 SV=1	3	20049539	11856382	21190996	20321550	21888736	2.51751e+07	2.58233e+07	3.04047e+07	3.43219e+07
Q8BGZ1	Hippocalcin-like protein 4 OS=Mus musculus OX=10090 GN=Hpcal4 PE=1 SV=3	3	561570634	2.1729e+08	287341691	202268970	1.66881e+08	199178179	3.48413e+08	2.67074e+08	2.9136e+08
Q8BGZ4	Cell division cycle protein 23 homolog OS=Mus musculus OX=10090 GN=Cdc23 PE=1 SV=2	2	53353998	1.2851e+08	4.66549e+08	253164996	7.66985e+07	564345207	207395192	1.91367e+08	1.77743e+08
Q8BH04	Phosphoenolpyruvate carboxykinase [GTP], mitochondrial OS=Mus musculus OX=10090 GN=Pck2 PE=1 SV=1	4	4.84056e+07	51316857	3.89131e+07	44536677	64512404	37644936	3.15045e+07	41424935	3.70824e+07
Q8BH24	Transmembrane 9 superfamily member 4 OS=Mus musculus OX=10090 GN=Tm9sf4 PE=1 SV=1	1	23038628	12581487		17379444	22007046	14725903	16976156	10844682	13617252
Q8BH44	Coronin-2B OS=Mus musculus OX=10090 GN=Coro2b PE=1 SV=2	9	1.00389e+08	95563354	84159561	80312614	9.4212e+07	7.26325e+07	7.9794e+07	7.51601e+07	7.79483e+07
Q8BH55	Threonine synthase-like 1 OS=Mus musculus OX=10090 GN=Thnsl1 PE=1 SV=1	4	3.08979e+07	3.23221e+07	1.96221e+07	25311571	2.76866e+07	1.99204e+07	23698937	28233374	2.72267e+07
Q8BH57	WD repeat-containing protein 48 OS=Mus musculus OX=10090 GN=Wdr48 PE=1 SV=1	8	8.32575e+07	8.48308e+07	79752446	6.12093e+07	7.50663e+07	8.93429e+07	8.27863e+07	64478392	8.00938e+07
Q8BH58	TIP41-like protein OS=Mus musculus OX=10090 GN=Tiprl PE=1 SV=1	4	31376631	2.99145e+07	1.76038e+07	2.94215e+07	27211883	2.86345e+07	2.56225e+07	2.76907e+07	2.74363e+07
Q8BH66	Atlastin-1 OS=Mus musculus OX=10090 GN=Atl1 PE=1 SV=1	17	5.99312e+08	5.61863e+08	4.84295e+08	4.9325e+08	5.79759e+08	516914937	5.06102e+08	5.50951e+08	5.68365e+08
Q8BHC1	Ras-related protein Rab-39B OS=Mus musculus OX=10090 GN=Rab39b PE=1 SV=1	5	167564800	114222615	128991377	1.30268e+08	9.70024e+07	128888848	1.43744e+08	112133219	1.07531e+08
Q8BHE3	Caytaxin OS=Mus musculus OX=10090 GN=Atcay PE=1 SV=1	9	185442378	1.14383e+08	91556006	121679457	97938263	84737188	1.28474e+08	1.22044e+08	1.26745e+08
Q8BHF7	CDP-diacylglycerol--glycerol-3-phosphate 3-phosphatidyltransferase, mitochondrial OS=Mus musculus OX=10090 GN=Pgs1 PE=1 SV=1	5	6.01167e+07	4.25155e+07	3.66231e+07	49730250	3.2157e+07	40638234	3.91733e+07	25792487	51965395
Q8BHG1	Nardilysin OS=Mus musculus OX=10090 GN=Nrdc PE=1 SV=1	7	71448731	50359898	4.67105e+07	3.6662e+07	41942295	5.94392e+07	5.821e+07	43397951	4.20609e+07
Q8BHG2	UPF0587 protein C1orf123 homolog OS=Mus musculus OX=10090 PE=1 SV=1	3	160400859	136937323	182443038	35981877	13436033	2.34093e+07	69011904	76046979	70593030
Q8BHN3	Neutral alpha-glucosidase AB OS=Mus musculus OX=10090 GN=Ganab PE=1 SV=1	24	850664490	635391178	5.84584e+08	641001275	6.46996e+08	5.35491e+08	664671289	617896794	5.8874e+08
Q8BHW2	Protein OSCP1 OS=Mus musculus OX=10090 GN=Oscp1 PE=1 SV=1	2	5.86318e+06	2629896	7463542				885552
Q8BHZ0	Protein FAM49A OS=Mus musculus OX=10090 GN=Fam49a PE=1 SV=1	6	136990993	153145814	105180900	121195651	119193345	1.12955e+08	1.61464e+08	1.2575e+08	134330361
Q8BIK4	Dedicator of cytokinesis protein 9 OS=Mus musculus OX=10090 GN=Dock9 PE=1 SV=2	4	16622233	1.82152e+07	17724385	1.27515e+07	20774907	16540816	1.62117e+07	1.82982e+07	14684129
Q8BIV3	Ran-binding protein 6 OS=Mus musculus OX=10090 GN=Ranbp6 PE=1 SV=3	1	10878513	11955449	7.95187e+06	10707425	9917242	8668413	9639771	12114660	11074099
Q8BIW1	Exopolyphosphatase PRUNE1 OS=Mus musculus OX=10090 GN=Prune1 PE=1 SV=1	16	675903651	6.61399e+08	564914487	2.31811e+08	1.63603e+08	1.59538e+08	431956780	402700920	4.10642e+08
Q8BIZ1	Ankyrin repeat and sterile alpha motif domain-containing protein 1B OS=Mus musculus OX=10090 GN=Anks1b PE=1 SV=3	16	3227066477	2738161852	2372469896	2458582482	2602128387	2069404289	2479478464	2496112935	2511980944
Q8BJ42	Disks large-associated protein 2 OS=Mus musculus OX=10090 GN=Dlgap2 PE=1 SV=2	24	7.09834e+08	4.42602e+08	2.70896e+08	7.77167e+07	4.36081e+07	2.93952e+07	2.10101e+08	2.20477e+08	2.37632e+08
Q8BJ71	Nuclear pore complex protein Nup93 OS=Mus musculus OX=10090 GN=Nup93 PE=1 SV=1	4	3.18507e+07	21592699	7.11238e+06	2.36199e+07	2.08269e+07	1.51802e+07	2.37979e+07	2.64777e+07	14785267
Q8BJF9	Charged multivesicular body protein 2b OS=Mus musculus OX=10090 GN=Chmp2b PE=1 SV=1	2	19522895	1.34141e+07			3.67228e+06		2559544	8008658	8.66937e+06
Q8BJH1	Zinc finger C2HC domain-containing protein 1A OS=Mus musculus OX=10090 GN=Zc2hc1a PE=1 SV=1	11	360811414	275618016	1.94319e+08	122300221	1.35269e+08	8.62002e+07	1.92761e+08	1.95246e+08	173404785
Q8BJI1	Sodium-dependent neutral amino acid transporter SLC6A17 OS=Mus musculus OX=10090 GN=Slc6a17 PE=1 SV=1	4	86154935	49447276	1.61118e+07	5.58242e+07	49391252	4.76201e+07	5.10893e+07	45709043	52656564
Q8BJU0	Small glutamine-rich tetratricopeptide repeat-containing protein alpha OS=Mus musculus OX=10090 GN=Sgta PE=1 SV=2	3	10200323	2.24373e+07	1.67167e+07	2.24813e+07	27043666	1.47666e+07	1.97737e+07	22598195	1.95848e+07
Q8BJW6	Eukaryotic translation initiation factor 2A OS=Mus musculus OX=10090 GN=Eif2a PE=1 SV=2	2	1.38456e+07	1.1551e+07	5527183	3.72317e+06	1.12896e+07	8.73454e+06	1.05487e+07	1.24383e+07	1.23039e+07
Q8BJY1	26S proteasome non-ATPase regulatory subunit 5 OS=Mus musculus OX=10090 GN=Psmd5 PE=1 SV=4	2	1.48386e+07	4.90841e+07	31595527	5.54254e+07	5.25858e+07	4.13542e+07	4.41952e+07	4.54315e+07	4.52527e+07
Q8BK08	Transmembrane protein 11, mitochondrial OS=Mus musculus OX=10090 GN=Tmem11 PE=1 SV=1	2	38219310	31484482	20402116	3.15789e+07	33705165	31187967	28182148	2.86075e+07	2.80079e+07
Q8BK63	Casein kinase I isoform alpha OS=Mus musculus OX=10090 GN=Csnk1a1 PE=1 SV=2	8	1.22877e+08	1.50441e+08	9.85792e+07	4.9441e+07	5.03191e+07	7.75663e+07	70386877	88257501	84108895
Q8BK64	Activator of 90 kDa heat shock protein ATPase homolog 1 OS=Mus musculus OX=10090 GN=Ahsa1 PE=1 SV=2	20	1376234884	1226667685	811588256	1758291834	1865628016	1477515200	1382621396	1559167391	1461170542
Q8BK67	Protein RCC2 OS=Mus musculus OX=10090 GN=Rcc2 PE=1 SV=1	2	1.95494e+07	17464175	2.2798e+07	19197549	1.81723e+07	1.54124e+07	13662714	16663844	1.67348e+07
Q8BKC5	Importin-5 OS=Mus musculus OX=10090 GN=Ipo5 PE=1 SV=3	5	55943200	5.88774e+07	3.83857e+07	36542870	4.78715e+07	3.29927e+07	42383375	39031729	5.09098e+07
Q8BKI2	Trinucleotide repeat-containing gene 6B protein OS=Mus musculus OX=10090 GN=Tnrc6b PE=1 SV=2	2	6.45374e+06	6.06161e+06			382760			584896	1.08887e+06
Q8BKX1	Brain-specific angiogenesis inhibitor 1-associated protein 2 OS=Mus musculus OX=10090 GN=Baiap2 PE=1 SV=2	25	1233784340	880512987	5.75717e+08	3.66406e+08	4.22616e+08	3.17546e+08	4.78314e+08	6.27054e+08	6.2401e+08
Q8BL65	Actin-binding LIM protein 2 OS=Mus musculus OX=10090 GN=Ablim2 PE=1 SV=1	10	2.58353e+08	199492137	1.32896e+08	8.82393e+07	7.91236e+07	8.32901e+07	1.3096e+08	1.38829e+08	1.40197e+08
Q8BL66	Early endosome antigen 1 OS=Mus musculus OX=10090 GN=Eea1 PE=1 SV=2	5	3.03093e+07	2.96045e+07	2.72012e+07	2.77981e+07	2.60701e+07	4.22487e+07	25743542	26605303	3.18373e+07
Q8BLE7	Vesicular glutamate transporter 2 OS=Mus musculus OX=10090 GN=Slc17a6 PE=1 SV=1	9	415367438	3.38104e+08	2.88825e+08	292622227	3.16276e+08	2.99939e+08	3.09856e+08	322053036	3.07351e+08
Q8BLF1	Neutral cholesterol ester hydrolase 1 OS=Mus musculus OX=10090 GN=Nceh1 PE=1 SV=1	12	4.69751e+08	3.62845e+08	2.93066e+08	2.72147e+08	291947531	2.47232e+08	3.17325e+08	3.2204e+08	3.10106e+08
Q8BLJ3	PI-PLC X domain-containing protein 3 OS=Mus musculus OX=10090 GN=Plcxd3 PE=1 SV=1	5	8.58393e+07	9.01868e+07	65198522	1.58177e+07	55151285	9.65102e+07	7.63201e+07	73556509	66608413
Q8BLK3	Limbic system-associated membrane protein OS=Mus musculus OX=10090 GN=Lsamp PE=1 SV=1	7	884216681	746664216	548963964	7.06696e+08	757718463	6.3475e+08	703907100	7.09231e+08	6.88974e+08
Q8BLN5	Lanosterol synthase OS=Mus musculus OX=10090 GN=Lss PE=1 SV=2	3	18039723	12606178	1.32012e+07	16097107	1.36772e+07	1.18649e+07	10979219	19884915	15717859
Q8BLQ9	Cell adhesion molecule 2 OS=Mus musculus OX=10090 GN=Cadm2 PE=1 SV=2	10	416435416	3.91064e+08	251231077	379972587	4.1836e+08	3.15146e+08	376211209	352508196	352679476
Q8BLR2	Copine-4 OS=Mus musculus OX=10090 GN=Cpne4 PE=1 SV=1	5	7.8434e+07	55250563	4.29166e+07	68417907	8.31037e+07	5.51621e+07	6.59079e+07	71458898	5.51338e+07
Q8BLY2	Probable threonine--tRNA ligase 2, cytoplasmic OS=Mus musculus OX=10090 GN=Tarsl2 PE=1 SV=1	3	2.50899e+07	24243836	7734645	15628536	22371874	25063294	22092744	21960420	24398661
Q8BM65	Neuronal tyrosine-phosphorylated phosphoinositide-3-kinase adapter 2 OS=Mus musculus OX=10090 GN=Nyap2 PE=1 SV=1	23	770851496	4.90881e+08	3.86532e+08	2.99487e+07	2.33478e+07	1.44008e+07	2.3559e+08	2.3496e+08	218195482
Q8BMA6	Signal recognition particle subunit SRP68 OS=Mus musculus OX=10090 GN=Srp68 PE=1 SV=2	4	5.0199e+07	3.26097e+07	31979897	1.99018e+07	2.59652e+07	1.54568e+07	2.47489e+07	2.34078e+07	2.31446e+07
Q8BMG7	Rab3 GTPase-activating protein non-catalytic subunit OS=Mus musculus OX=10090 GN=Rab3gap2 PE=1 SV=2	13	1.96374e+08	1.72465e+08	1.40748e+08	1.05956e+08	1.16507e+08	9.18321e+07	1.31504e+08	1.38568e+08	1.33834e+08
Q8BMI3	ADP-ribosylation factor-binding protein GGA3 OS=Mus musculus OX=10090 GN=Gga3 PE=1 SV=2	2	9.91845e+06	7.62708e+06	4.10239e+06	6.33093e+06	5.52829e+06	4501060	2.46041e+06	5.42211e+06	4.97907e+06
Q8BMJ2	Leucine--tRNA ligase, cytoplasmic OS=Mus musculus OX=10090 GN=Lars PE=1 SV=2	20	270539749	253252114	199268862	2.26349e+08	208301834	1.99967e+08	1.97008e+08	483779409	214691896
Q8BMK4	Cytoskeleton-associated protein 4 OS=Mus musculus OX=10090 GN=Ckap4 PE=1 SV=2	2	36964424	32141342	7995349	41219488	44285579	28736058	33304496	28294328	23062010
Q8BML9	Glutamine--tRNA ligase OS=Mus musculus OX=10090 GN=Qars PE=1 SV=1	12	1.58588e+08	1.88181e+08	1.79291e+08	1.75184e+08	1.46638e+08	110463883	1.60393e+08	1.70984e+08	1.40167e+08
Q8BMP6	Golgi resident protein GCP60 OS=Mus musculus OX=10090 GN=Acbd3 PE=1 SV=3	3	5.79593e+07	4.56932e+07	5.16912e+07	3.26641e+07	3.61725e+07	3.22549e+07	47741204	4.28414e+07	4.18453e+07
Q8BNJ6	Neuropilin and tolloid-like protein 2 OS=Mus musculus OX=10090 GN=Neto2 PE=1 SV=1	2	7861475	1.61689e+07	4.01521e+06	8.19256e+06	1.43954e+07	2718358	6.62449e+06	3.62095e+06	2.11525e+06
Q8BNU0	Armadillo repeat-containing protein 6 OS=Mus musculus OX=10090 GN=Armc6 PE=1 SV=1	9	6575138782	3713876007	2625109931	2.01407e+08	160892001	8.6611e+07	1881228390	1857684235	1844138777
Q8BNW9	Kelch repeat and BTB domain-containing protein 11 OS=Mus musculus OX=10090 GN=Kbtbd11 PE=1 SV=3	9	1.0584e+08	9.14558e+07	6.80841e+07	83186533	8.36378e+07	8.50902e+07	1.00417e+08	87032062	83902902
Q8BP47	Asparagine--tRNA ligase, cytoplasmic OS=Mus musculus OX=10090 GN=Nars PE=1 SV=2	13	3.89449e+08	381261782	2.936e+08	3.38838e+08	388033030	323238876	365047696	3.56472e+08	328164203
Q8BP71	RNA binding protein fox-1 homolog 2 OS=Mus musculus OX=10090 GN=Rbfox2 PE=1 SV=2	2	26283854	24754048	23626060	20422391	22985304	2.25377e+07	18918344	2.16621e+07	2.02361e+07
Q8BPN8	DmX-like protein 2 OS=Mus musculus OX=10090 GN=Dmxl2 PE=1 SV=3	72	1611686743	1510957110	1241985762	1787143715	1836848718	1654147149	1521632634	1695310841	1599762221
Q8BPQ7	Small G protein signaling modulator 1 OS=Mus musculus OX=10090 GN=Sgsm1 PE=1 SV=2	4	1.409e+07	2.49872e+07	13013342	21522753	3.55886e+06	1.32637e+07	1.26526e+07	1.42424e+07	8.17159e+06
Q8BQZ4	Ral GTPase-activating protein subunit beta OS=Mus musculus OX=10090 GN=Ralgapb PE=1 SV=2	3	14938297	14331195	1.46042e+07	16925768	15338134	10613963	1.58461e+07	16264728	1.66403e+07
Q8BR90	UPF0600 protein C5orf51 homolog OS=Mus musculus OX=10090 PE=1 SV=1	1	10180583	2322761	7959492	12085018	2.58866e+06	2.4405e+06		6.45851e+06	2238641
Q8BR92	Paralemmin-2 OS=Mus musculus OX=10090 GN=Palm2 PE=1 SV=1	1	26430984	1.04175e+07	2409094	3.0858e+06		1.63205e+06	9009019	3.39616e+06	8.09118e+06
Q8BRF7	Sec1 family domain-containing protein 1 OS=Mus musculus OX=10090 GN=Scfd1 PE=1 SV=1	3	1.55585e+07	1.25742e+07	5.14055e+06	2.65151e+06	13375727	2183598	5.67356e+06	2.78226e+06	8.08946e+06
Q8BRJ4	Protein phosphatase 1 regulatory subunit 3E OS=Mus musculus OX=10090 GN=Ppp1r3e PE=1 SV=2	1	4337309			5.00194e+06			8801168
Q8BRT1	CLIP-associating protein 2 OS=Mus musculus OX=10090 GN=Clasp2 PE=1 SV=1	23	393512713	322266123	2.31026e+08	2.09072e+08	2.32044e+08	1.80998e+08	2.50991e+08	289085826	2.49642e+08
Q8BSL7	ADP-ribosylation factor 2 OS=Mus musculus OX=10090 GN=Arf2 PE=1 SV=2	1	22961864	24797887	24789492	9744280	22114787	8.12473e+06	18523871	12352451	19969956
Q8BSS9	Liprin-alpha-2 OS=Mus musculus OX=10090 GN=Ppfia2 PE=1 SV=2	3	22676522	2.08728e+07	4.12397e+06	2.62948e+06	3.03363e+07	1.3807e+07	9.77646e+06	1.18506e+07	1.63129e+07
Q8BT60	Copine-3 OS=Mus musculus OX=10090 GN=Cpne3 PE=1 SV=2	1	9323797	8.24443e+06	5.6398e+06	6949686	9187749	8.08493e+06	9266876	6010066	8586820
Q8BTG3	T-complex protein 11-like protein 1 OS=Mus musculus OX=10090 GN=Tcp11l1 PE=1 SV=1	1	6.63787e+06	3.48923e+06	3.72881e+06	1.97203e+06	2.36308e+06	1.59928e+06	3.55894e+06	2.95318e+06	2.84737e+06
Q8BTG7	Protein NDRG4 OS=Mus musculus OX=10090 GN=Ndrg4 PE=1 SV=1	5	191732927	154535377	1.0467e+08	1.29436e+08	1.48426e+08	1.38204e+08	1.49936e+08	1.52246e+08	146399168
Q8BTM8	Filamin-A OS=Mus musculus OX=10090 GN=Flna PE=1 SV=5	10	5.46116e+07	5.50557e+07	3.47942e+07	7.54509e+07	77501248	49435231	5.39211e+07	6.71484e+07	65279837
Q8BTZ7	Mannose-1-phosphate guanyltransferase beta OS=Mus musculus OX=10090 GN=Gmppb PE=1 SV=1	4	4.01769e+07	30545161	17190917	2.93096e+07	2.94584e+07	2.87111e+07	3.12193e+07	2.4291e+07	3.09262e+07
Q8BU30	Isoleucine--tRNA ligase, cytoplasmic OS=Mus musculus OX=10090 GN=Iars PE=1 SV=2	12	1.14552e+08	1.00853e+08	9.28637e+07	1.2557e+08	1.12045e+08	1.01979e+08	93689062	1.04675e+08	1.10757e+08
Q8BUV3	Gephyrin OS=Mus musculus OX=10090 GN=Gphn PE=1 SV=2	14	339109725	302670578	2.53666e+08	277739549	3.06666e+08	2.67276e+08	293974004	281108169	298516865
Q8BVA5	Lipid droplet-associated hydrolase OS=Mus musculus OX=10090 GN=Ldah PE=1 SV=1	1	9344977	13705385	31069760	36099992	9728392	15268450	10477693	21678660	22453054
Q8BVE3	V-type proton ATPase subunit H OS=Mus musculus OX=10090 GN=Atp6v1h PE=1 SV=1	27	1359250561	9.81011e+08	854715046	1093514262	1075975667	1051405957	1017332685	1082708815	1077191495
Q8BVG4	Dipeptidyl peptidase 9 OS=Mus musculus OX=10090 GN=Dpp9 PE=1 SV=2	2	13334493	1.07595e+07	7.40328e+06	3.58048e+06	13271081	1.28277e+07	1.06156e+07	1.31103e+07	11148642
Q8BVQ5	Protein phosphatase methylesterase 1 OS=Mus musculus OX=10090 GN=Ppme1 PE=1 SV=5	11	4.01031e+08	2.97926e+08	264201427	315771249	323826250	2.38645e+08	322992472	264934158	264903068
Q8BW41	Protein O-linked-mannose beta-1,4-N-acetylglucosaminyltransferase 2 OS=Mus musculus OX=10090 GN=Pomgnt2 PE=1 SV=1	1	40674424	20780060	16812684	18358400		8686609	5107834	13970175	28849456
Q8BW96	Calcium/calmodulin-dependent protein kinase type 1D OS=Mus musculus OX=10090 GN=Camk1d PE=1 SV=2	7	1.82771e+08	1.67979e+08	1.32071e+08	4.70536e+07	4.78962e+07	4.2991e+07	1.10619e+08	1.04653e+08	9.84992e+07
Q8BWF0	Succinate-semialdehyde dehydrogenase, mitochondrial OS=Mus musculus OX=10090 GN=Aldh5a1 PE=1 SV=1	15	1143011439	875645624	6.8378e+08	7.25004e+08	877562453	625718646	840262279	8.3961e+08	8.31787e+08
Q8BWG8	Beta-arrestin-1 OS=Mus musculus OX=10090 GN=Arrb1 PE=1 SV=1	9	1.00852e+08	1.03162e+08	7.87802e+07	8.06231e+07	8.83735e+07	85661013	7.7848e+07	8.16113e+07	8.0243e+07
Q8BWQ6	UPF0505 protein C16orf62 homolog OS=Mus musculus OX=10090 PE=1 SV=2	3	35181997	26940931	2.40827e+07	7384799	5.04835e+06		21706529	13027640	7743170
Q8BWR2	PITH domain-containing protein 1 OS=Mus musculus OX=10090 GN=Pithd1 PE=1 SV=1	4	5.96739e+07	42397077	32405028	33541003	37928103	3.11648e+07	36863478	40193641	43170575
Q8BWS5	G protein-regulated inducer of neurite outgrowth 3 OS=Mus musculus OX=10090 GN=Gprin3 PE=1 SV=1	15	256132601	2.38566e+08	1.10066e+08	5.3324e+07	50340224	3.68086e+07	8.14758e+07	76634481	1.00271e+08
Q8BWT5	Disco-interacting protein 2 homolog A OS=Mus musculus OX=10090 GN=Dip2a PE=1 SV=3	2	14392857	9.40837e+06	4.97061e+06	4941727	4.10204e+06	8250085	1.00808e+07	8756119	1.03535e+07
Q8BWY3	Eukaryotic peptide chain release factor subunit 1 OS=Mus musculus OX=10090 GN=Etf1 PE=1 SV=4	4	45449315	40732793	3.36603e+07	23773612	3.75782e+07	3.77629e+07	34279378	41893367	36579653
Q8BWZ3	N-alpha-acetyltransferase 25, NatB auxiliary subunit OS=Mus musculus OX=10090 GN=Naa25 PE=1 SV=1	3	2.25187e+07	1.45148e+07	23380761	1.43901e+07	1.15605e+07	23654206	17592256	18920400	19795029
Q8BX57	PX domain-containing protein kinase-like protein OS=Mus musculus OX=10090 GN=Pxk PE=1 SV=2	2	35858147	29366568	22356302	17833092	2.74492e+07	17364548	17779536	18298536	22150928
Q8BX70	Vacuolar protein sorting-associated protein 13C OS=Mus musculus OX=10090 GN=Vps13c PE=1 SV=2	1	4.21467e+06	2773661		3.16195e+06	3778265	3.34421e+06	3.4155e+06	3.63479e+06	3.7732e+06
Q8BX94	Oxysterol-binding protein-related protein 2 OS=Mus musculus OX=10090 GN=Osbpl2 PE=1 SV=1	3	20864358	11068674	1.44386e+07	10381675	16383214	1.60917e+07	2.083e+07	1.70292e+07	1.41465e+07
Q8BXA5	Cleft lip and palate transmembrane protein 1-like protein OS=Mus musculus OX=10090 GN=Clptm1l PE=1 SV=1	1	5486843	6263602	4.22504e+06	6.4741e+06	4.04487e+06	5.80729e+06	3.99847e+06	5.38697e+06	6.22791e+06
Q8BXK8	Arf-GAP with GTPase, ANK repeat and PH domain-containing protein 1 OS=Mus musculus OX=10090 GN=Agap1 PE=1 SV=1	4	35355438	3.37935e+07	46443622	2.59533e+07	2.71325e+07	1.85771e+07	3.67555e+07	26724408	2.99052e+07
Q8BXR1	Probable cationic amino acid transporter OS=Mus musculus OX=10090 GN=Slc7a14 PE=1 SV=1	4	5.16219e+07	64744914	3.37271e+07	52270515	29021407	33962875	54415978	55658742	49067881
Q8BXR9	Oxysterol-binding protein-related protein 6 OS=Mus musculus OX=10090 GN=Osbpl6 PE=1 SV=1	3	24544817	2.10901e+07	1.27455e+07	20805498	1.29384e+07	2.64318e+07	20416794	23659945	30419944
Q8BY87	Ubiquitin carboxyl-terminal hydrolase 47 OS=Mus musculus OX=10090 GN=Usp47 PE=1 SV=2	4	27426533	23505071	1.70894e+07	3.46378e+07	6170621	5964743	15013881	1.35133e+07	13082382
Q8BYH7	TBC1 domain family member 17 OS=Mus musculus OX=10090 GN=Tbc1d17 PE=1 SV=2	1	12202125	13495145		5.39387e+06	21408156	2.73416e+06	5.7637e+06	4.81922e+06	15885472
Q8BYI9	Tenascin-R OS=Mus musculus OX=10090 GN=Tnr PE=1 SV=2	35	2466066003	1794637105	1697932941	2163393301	2316869080	2073610263	2011445074	2078161299	2077771495
Q8BYL4	Tyrosine--tRNA ligase, mitochondrial OS=Mus musculus OX=10090 GN=Yars2 PE=1 SV=2	3	1.37972e+07	7.63007e+06	5.93546e+06	6.10482e+06	3.84751e+06	5.73955e+06	26180684	7337509	1.31701e+07
Q8BYM5	Neuroligin-3 OS=Mus musculus OX=10090 GN=Nlgn3 PE=1 SV=2	10	2.52707e+08	1.86004e+08	2.09284e+08	206949281	224252560	2.10288e+08	1.84223e+08	3.33641e+08	3.77095e+08
Q8BYM8	Probable cysteine--tRNA ligase, mitochondrial OS=Mus musculus OX=10090 GN=Cars2 PE=1 SV=2	1	8.27812e+06				3.37589e+06	3354282	5087843	6175479	5.06216e+06
Q8BYN5	FSD1-like protein OS=Mus musculus OX=10090 GN=Fsd1l PE=1 SV=2	4	23437257	10585440	11097695	1.67269e+07	8731358	9048126	9872795	1.35032e+07	21427024
Q8BYR5	Calcium-dependent secretion activator 2 OS=Mus musculus OX=10090 GN=Cadps2 PE=1 SV=2	4	1.89077e+07	1.46556e+07	9.5837e+06	24903689	1.73652e+07	1.44136e+07	2.92182e+07	23818180	26432450
Q8BZ98	Dynamin-3 OS=Mus musculus OX=10090 GN=Dnm3 PE=1 SV=1	24	559982093	430525411	3.4506e+08	435266969	412853643	396644313	4.21601e+08	425736545	4.30887e+08
Q8BZA9	Fructose-2,6-bisphosphatase TIGAR OS=Mus musculus OX=10090 GN=Tigar PE=1 SV=1	2		9696940	13304058				1.46378e+07	11453712	20439585
Q8C050	Ribosomal protein S6 kinase alpha-5 OS=Mus musculus OX=10090 GN=Rps6ka5 PE=1 SV=2	2	1.45939e+07	4417343	7.12866e+06	5.21776e+06	3644157	7.29794e+06	1.1486e+07	9218775	6202456
Q8C052	Microtubule-associated protein 1S OS=Mus musculus OX=10090 GN=Map1s PE=1 SV=2	3	9.68064e+07	8.12559e+07	4.80657e+07	6.57747e+07	75987912	55096369	7.50022e+07	6.752e+07	7.7409e+07
Q8C078	Calcium/calmodulin-dependent protein kinase kinase 2 OS=Mus musculus OX=10090 GN=Camkk2 PE=1 SV=2	9	195610480	159162788	1.2681e+08	119377505	144033554	1.19648e+08	118996739	1.40068e+08	1.15281e+08
Q8C079	Striatin-interacting protein 1 OS=Mus musculus OX=10090 GN=Strip1 PE=1 SV=2	3	60248818	56306052	4.4478e+07	54001283	54031700	46717686	5.22784e+07	5.71019e+07	55975045
Q8C080	Sorting nexin-16 OS=Mus musculus OX=10090 GN=Snx16 PE=1 SV=2	3	2.02642e+07	15294438	6.42333e+06	1.19466e+06	5516868	1.27267e+06	8.98218e+06	3.79253e+06	5.17628e+06
Q8C0C7	Phenylalanine--tRNA ligase alpha subunit OS=Mus musculus OX=10090 GN=Farsa PE=1 SV=1	4	41153664	27515302	2.29285e+07	1.53228e+07	25306837	1.58442e+07	2.67116e+07	25396451	30073193
Q8C0E2	Vacuolar protein sorting-associated protein 26B OS=Mus musculus OX=10090 GN=Vps26b PE=1 SV=1	8	7.368e+07	1.03467e+08	3.61456e+07	8.74211e+07	9.42893e+07	3.20856e+07	5.27178e+07	51438942	85525611
Q8C0L0	Thioredoxin-related transmembrane protein 4 OS=Mus musculus OX=10090 GN=Tmx4 PE=1 SV=2	4	96193550	112061174	52630660	64562340	41661038	42258951	56395129	74125553	8.91286e+07
Q8C0M9	Isoaspartyl peptidase/L-asparaginase OS=Mus musculus OX=10090 GN=Asrgl1 PE=1 SV=1	10	5.90259e+08	436905349	3.19328e+08	490827066	4.79826e+08	4.22364e+08	456170620	407062831	410381934
Q8C0T5	Signal-induced proliferation-associated 1-like protein 1 OS=Mus musculus OX=10090 GN=Sipa1l1 PE=1 SV=2	12	1.16886e+08	6.65707e+07	7.22876e+07	3.52727e+07	3.99548e+07	5.57981e+07	5.31561e+07	4.86606e+07	4.95739e+07
Q8C129	Leucyl-cystinyl aminopeptidase OS=Mus musculus OX=10090 GN=Lnpep PE=1 SV=1	6	8.35901e+07	6.73215e+07	3.44699e+07	9.87497e+06	1.5131e+07	4941143	4.76655e+07	26238156	37186601
Q8C166	Copine-1 OS=Mus musculus OX=10090 GN=Cpne1 PE=1 SV=1	7	1.26231e+08	97153611	9.62264e+07	82684030	91705095	9.04301e+07	8.97666e+07	8.68302e+07	1.11817e+08
Q8C1A5	Thimet oligopeptidase OS=Mus musculus OX=10090 GN=Thop1 PE=1 SV=1	15	294589975	2.79172e+08	238990177	2.81975e+08	2.21389e+08	2.96293e+08	227794160	2.24887e+08	262480792
Q8C1B1	Calmodulin-regulated spectrin-associated protein 2 OS=Mus musculus OX=10090 GN=Camsap2 PE=1 SV=3	2	21518460	5880051	5401788	13481888	14381339	9654275	16126653	2.0236e+07	3.0536e+06
Q8C1B7	Septin-11 OS=Mus musculus OX=10090 GN=Sept11 PE=1 SV=4	22	1216589672	9.06391e+08	5.38544e+08	846282490	9.22925e+08	7.68299e+08	886015095	8.14646e+08	816336891
Q8C2E7	WASH complex subunit 5 OS=Mus musculus OX=10090 GN=Washc5 PE=1 SV=2	65	8551379252	6994796049	4659765257	1.1692e+08	92124739	99109596	2982508630	3096256054	2993934912
Q8C2Q3	RNA-binding protein 14 OS=Mus musculus OX=10090 GN=Rbm14 PE=1 SV=1	5	2.5694e+07	3.07971e+07	4.12195e+07	1.62656e+07	33070734	2.69953e+07	2.65122e+07	27864691	28400171
Q8C3F2	Constitutive coactivator of PPAR-gamma-like protein 2 OS=Mus musculus OX=10090 GN=Fam120c PE=1 SV=3	4	1.31474e+08	161647492	193974881	133356138	157990237	1.27519e+08	82321450	95257690	163833577
Q8C3W1	Uncharacterized protein C1orf198 homolog OS=Mus musculus OX=10090 PE=1 SV=1	3	37839490	36649359	2.79851e+07	10606250	2.1712e+07	1.39492e+07	18875431	1.88942e+07	21102687
Q8C419	Probable G-protein coupled receptor 158 OS=Mus musculus OX=10090 GN=Gpr158 PE=1 SV=2	16	339456313	2.73466e+08	1.64591e+08	200499500	2.35467e+08	1.78255e+08	2.24152e+08	1.77215e+08	1.89711e+08
Q8C437	PEX5-related protein OS=Mus musculus OX=10090 GN=Pex5l PE=1 SV=2	12	2.95878e+08	159283470	140017576	39701836	3.6247e+07	2.70456e+07	90528246	91027506	8.59313e+07
Q8C522	Endonuclease domain-containing 1 protein OS=Mus musculus OX=10090 GN=Endod1 PE=1 SV=2	2	1.88114e+07	23475751	9115082	28518791	28859648	21294790	28076550	1.94697e+07	20797801
Q8C570	mRNA export factor OS=Mus musculus OX=10090 GN=Rae1 PE=1 SV=1	5	4.48728e+07	7.54723e+07	6.14734e+07	45118424	56362652	43789394	5.81157e+07	60979536	8.20758e+07
Q8C5L3	CCR4-NOT transcription complex subunit 2 OS=Mus musculus OX=10090 GN=Cnot2 PE=1 SV=2	5	68512306	4.19569e+07	2.79386e+07	10388853	2.34385e+06	9.03208e+06	1.26226e+07	3.41743e+07	38846080
Q8C5Q4	G-rich sequence factor 1 OS=Mus musculus OX=10090 GN=Grsf1 PE=1 SV=2	1	5690412	10148805	3.54419e+06	2.71478e+06	1.46198e+06		3.73346e+06	4493448	5.01128e+06
Q8C6E0	Cilia- and flagella-associated protein 36 OS=Mus musculus OX=10090 GN=Cfap36 PE=1 SV=1	3	1.76309e+07	8.45032e+06					1020200	914242	6.01013e+06
Q8C6G8	WD repeat-containing protein 26 OS=Mus musculus OX=10090 GN=Wdr26 PE=1 SV=3	2	25215010	3.40388e+07	1.32062e+07	1.7462e+07	1.80701e+07	1.60726e+07	2.11177e+07	1.58307e+07	8732534
Q8C729	Protein FAM126B OS=Mus musculus OX=10090 GN=Fam126b PE=1 SV=1	6	7.70858e+07	3.8651e+07	4.44007e+07	5.23586e+07	4.11782e+07	3.20249e+07	61139245	4.25131e+07	5.03094e+07
Q8C739	Protein FAM110B OS=Mus musculus OX=10090 GN=Fam110b PE=1 SV=1	1	6573318	4.04831e+06	3.35874e+06		1.07574e+06		2.44702e+06	1.77551e+06	2.55232e+06
Q8C754	Vacuolar protein sorting-associated protein 52 homolog OS=Mus musculus OX=10090 GN=Vps52 PE=1 SV=1	4	31110037	2.63266e+07	26656675	2.66512e+07	25702565	1.86629e+07	27038763	2.6659e+07	23214322
Q8C7D2	Protein cereblon OS=Mus musculus OX=10090 GN=Crbn PE=1 SV=1	2	1.11189e+07	22369602	8.81253e+06	2.30087e+07	13600181	16690993	10026921	23661169	1.83629e+07
Q8C7K6	Prenylcysteine oxidase-like OS=Mus musculus OX=10090 GN=Pcyox1l PE=1 SV=1	4	38761867	2.77255e+07	32684269	41499707	3.60098e+07	2.0692e+07	33557667	23724433	2.7202e+07
Q8C7M3	E3 ubiquitin-protein ligase TRIM9 OS=Mus musculus OX=10090 GN=Trim9 PE=1 SV=2	7	7.22235e+07	7.93713e+07	45681069	88438351	7.61535e+07	69415285	79829373	75962315	92163646
Q8C854	Myelin expression factor 2 OS=Mus musculus OX=10090 GN=Myef2 PE=1 SV=1	12	4.37767e+08	2.23107e+08	2.60548e+08	3.50658e+08	3.69678e+08	3.86367e+08	2.91112e+08	3.07201e+08	2.89046e+08
Q8C878	NEDD8-activating enzyme E1 catalytic subunit OS=Mus musculus OX=10090 GN=Uba3 PE=1 SV=2	4	86969678	75803715	76562422	67258351	65960679	74763414	67318269	72997038	92196010
Q8C8N2	Protein SCAI OS=Mus musculus OX=10090 GN=Scai PE=1 SV=2	8	81143888	5.83495e+07	62977613	56691433	5.52503e+07	4.59904e+07	56777201	55341733	80975806
Q8C8R3	Ankyrin-2 OS=Mus musculus OX=10090 GN=Ank2 PE=1 SV=2	110	4622229742	3723757053	2938177256	3017421305	3293699372	2705714824	3196554737	3356105913	3296744381
Q8C8T7	Protein ELFN1 OS=Mus musculus OX=10090 GN=Elfn1 PE=2 SV=1	5	73935416	27814561	2.32357e+07	3003834		2069487	12088070	7476554	2.52423e+07
Q8C996	Transmembrane protein 163 OS=Mus musculus OX=10090 GN=Tmem163 PE=1 SV=1	3	32533502	26333548	2.0977e+07	2.85991e+07	2.49242e+07	2.10737e+07	2.60629e+07	3.29419e+07	28103456
Q8CA95	cAMP and cAMP-inhibited cGMP 3',5'-cyclic phosphodiesterase 10A OS=Mus musculus OX=10090 GN=Pde10a PE=1 SV=2	10	1.61536e+08	1.11192e+08	8.8785e+07	1.18621e+08	1.37837e+08	1.13504e+08	110570407	136930337	129765488
Q8CAA7	Glucose 1,6-bisphosphate synthase OS=Mus musculus OX=10090 GN=Pgm2l1 PE=1 SV=1	17	871708313	7.36221e+08	5.75361e+08	732875465	805305318	7.0799e+08	8.11353e+08	7.67442e+08	7.55519e+08
Q8CAB8	Cytosolic arginine sensor for mTORC1 subunit 2 OS=Mus musculus OX=10090 GN=Castor2 PE=1 SV=1	1	8.02326e+06	5.13485e+06	3.53824e+06	5241084	5945400	5.29503e+06	6.44098e+06	7300096	6718353
Q8CAY6	Acetyl-CoA acetyltransferase, cytosolic OS=Mus musculus OX=10090 GN=Acat2 PE=1 SV=2	13	351568796	287223368	236387098	254784146	259193874	2.26361e+08	234551763	266793323	2.66085e+08
Q8CBE3	WD repeat-containing protein 37 OS=Mus musculus OX=10090 GN=Wdr37 PE=1 SV=1	13	4.15181e+08	3.47639e+08	2.36863e+08	3.67518e+08	2.9496e+08	3.01774e+08	3.2389e+08	3.07065e+08	2.32905e+08
Q8CBW3	Abl interactor 1 OS=Mus musculus OX=10090 GN=Abi1 PE=1 SV=3	14	8.99699e+08	580811637	3.32672e+08	4.06258e+07	4.22832e+07	2.81963e+07	2.66014e+08	2.91728e+08	303391359
Q8CBY8	Dynactin subunit 4 OS=Mus musculus OX=10090 GN=Dctn4 PE=1 SV=1	8	1.10996e+08	111626088	9.01477e+07	97176629	8.99574e+07	8.92593e+07	98287185	91047256	9.10429e+07
Q8CC35	Synaptopodin OS=Mus musculus OX=10090 GN=Synpo PE=1 SV=2	25	1281680447	929753195	5.48735e+08	2.15861e+08	2.01909e+08	1.32147e+08	511280385	5.00315e+08	509801501
Q8CCB4	Vacuolar protein sorting-associated protein 53 homolog OS=Mus musculus OX=10090 GN=Vps53 PE=1 SV=1	4	3.32865e+07	36364260	3.31767e+07	34318258	2.86982e+07	2.58586e+07	3.43362e+07	27356681	3.21421e+07
Q8CCJ4	APC membrane recruitment protein 2 OS=Mus musculus OX=10090 GN=Amer2 PE=1 SV=2	1	8.38342e+06	8484306		6545030	6.80982e+06	4635964		5717846	4385031
Q8CCN5	Breast carcinoma-amplified sequence 3 homolog OS=Mus musculus OX=10090 GN=Bcas3 PE=1 SV=2	7	1.93053e+08	233212241	1.53935e+08	3.15371e+08	3.12599e+08	256546852	2.59995e+08	2.39917e+08	2.55802e+08
Q8CCT4	Transcription elongation factor A protein-like 5 OS=Mus musculus OX=10090 GN=Tceal5 PE=1 SV=1	11	2.16844e+08	192557428	7.22038e+07	7.83758e+07	7.90301e+07	5.36009e+07	1.15221e+08	1.21617e+08	1.12019e+08
Q8CDG3	Deubiquitinating protein VCIP135 OS=Mus musculus OX=10090 GN=Vcpip1 PE=1 SV=1	18	289178524	222997679	1.704e+08	3.40387e+07	2.95954e+07	2.16617e+07	1.19096e+08	1.34024e+08	1.14518e+08
Q8CDN6	Thioredoxin-like protein 1 OS=Mus musculus OX=10090 GN=Txnl1 PE=1 SV=3	25	7007737522	6415888263	4499278161	289578970	2.61071e+08	3.03275e+08	2794171939	2786789073	2716591234
Q8CE50	Sorting nexin-30 OS=Mus musculus OX=10090 GN=Snx30 PE=1 SV=1	19	739807310	5.51024e+08	3.4981e+08	5.73258e+07	4.01454e+07	3.75915e+07	2.43108e+08	232819760	2.54704e+08
Q8CFA2	Aminomethyltransferase, mitochondrial OS=Mus musculus OX=10090 GN=Amt PE=1 SV=1	2	21957293	2.00557e+07	1.16203e+07	1.34669e+07	16983726	14704028	19247680	1.68177e+07	18425714
Q8CFE4	SCY1-like protein 2 OS=Mus musculus OX=10090 GN=Scyl2 PE=1 SV=1	2	16539623	9263723	7.51837e+06	8979534	1.03105e+07	6.42014e+06	8864368	10312075	9.89356e+06
Q8CG72	Poly(ADP-ribose) glycohydrolase ARH3 OS=Mus musculus OX=10090 GN=Adprhl2 PE=1 SV=1	3	3.73238e+07	27420662	2.28584e+07	26359083	2.63739e+07	2.58105e+07	24768217	2.62219e+07	2.93218e+07
Q8CGA0	Protein phosphatase 1F OS=Mus musculus OX=10090 GN=Ppm1f PE=1 SV=1	2	8670645	9472431	19177730	6.25508e+06	7717428	8648968		1.51545e+07	5656280
Q8CGC7	Bifunctional glutamate/proline--tRNA ligase OS=Mus musculus OX=10090 GN=Eprs PE=1 SV=4	42	7.98456e+08	6.88994e+08	6.31099e+08	6.37402e+08	625659617	6.10544e+08	6.43091e+08	7.19839e+08	6.79729e+08
Q8CGF6	WD repeat-containing protein 47 OS=Mus musculus OX=10090 GN=Wdr47 PE=1 SV=2	16	4.33214e+08	3.73425e+08	3.31302e+08	3.32059e+08	3.981e+08	304172173	3.64586e+08	3.68649e+08	3.45919e+08
Q8CGK7	Guanine nucleotide-binding protein G(olf) subunit alpha OS=Mus musculus OX=10090 GN=Gnal PE=1 SV=1	3	3.54784e+07	26269568	1.49919e+07	25424845	2.07583e+07		5.69173e+07	2.0926e+07	30925867
Q8CGY8	UDP-N-acetylglucosamine--peptide N-acetylglucosaminyltransferase 110 kDa subunit OS=Mus musculus OX=10090 GN=Ogt PE=1 SV=2	24	3.98711e+08	3.41707e+08	3.21181e+08	3.46509e+08	3.38017e+08	3.07551e+08	3.4969e+08	3.26127e+08	364646372
Q8CH72	E3 ubiquitin-protein ligase TRIM32 OS=Mus musculus OX=10090 GN=Trim32 PE=1 SV=2	3	1.98562e+07	1.71375e+07	1.46751e+07	20409823	19735726	16549116	22113065	20036554	1.85079e+07
Q8CH77	Neuron navigator 1 OS=Mus musculus OX=10090 GN=Nav1 PE=1 SV=2	21	514368370	289986494	1.85138e+08	2.91283e+07	2.31484e+07	1.73603e+07	1.59264e+08	1.52041e+08	1.53308e+08
Q8CHC4	Synaptojanin-1 OS=Mus musculus OX=10090 GN=Synj1 PE=1 SV=3	59	3180804616	2832283018	2251321367	2726702859	2994242102	2567365303	2686205844	2708633076	2661930522
Q8CHG7	Rap guanine nucleotide exchange factor 2 OS=Mus musculus OX=10090 GN=Rapgef2 PE=1 SV=2	15	212514112	1.79464e+08	1.33647e+08	1.26934e+08	1.2372e+08	127869350	130614741	1.54913e+08	1.54117e+08
Q8CHH9	Septin-8 OS=Mus musculus OX=10090 GN=Sept8 PE=1 SV=4	9	547896255	4.36132e+08	3.18617e+08	4.36973e+08	460829292	3.79691e+08	410621257	434246235	414636558
Q8CHP8	Glycerol-3-phosphate phosphatase OS=Mus musculus OX=10090 GN=Pgp PE=1 SV=1	6	98258020	80570059	5.60305e+07	112901271	111903735	8.6305e+07	105027027	109059491	112476729
Q8CHT1	Ephexin-1 OS=Mus musculus OX=10090 GN=Ngef PE=1 SV=1	11	2.0876e+08	1.67285e+08	169542290	1.89215e+08	2.6822e+08	1.77341e+08	179145529	1.81558e+08	180946195
Q8CHU3	Epsin-2 OS=Mus musculus OX=10090 GN=Epn2 PE=1 SV=1	5	71504485	37580723	23734653	8.94475e+06	8.59753e+06	7.03397e+06	23478175	18693451	2.4392e+07
Q8CHX7	Raftlin-2 OS=Mus musculus OX=10090 GN=Rftn2 PE=1 SV=3	6	220662825	1.5516e+08	1.03811e+08	9.13764e+07	68457501	73335556	1.09726e+08	1.21943e+08	1.34394e+08
Q8CHY3	Dymeclin OS=Mus musculus OX=10090 GN=Dym PE=1 SV=1	1	3.28108e+06	1.59357e+06	2287081				3.76008e+06	3.1843e+06	3.34427e+06
Q8CI51	PDZ and LIM domain protein 5 OS=Mus musculus OX=10090 GN=Pdlim5 PE=1 SV=4	2	20697728	15827183	1.53788e+07	13359964	8746349		12294982	1.37417e+07	1.52424e+07
Q8CI71	Syndetin OS=Mus musculus OX=10090 GN=Vps50 PE=1 SV=2	2	14189180	9991180	3.79278e+06	5622381	9.42783e+06	5.3093e+06	7.27723e+06	4.51487e+06	8.91315e+06
Q8CI94	Glycogen phosphorylase, brain form OS=Mus musculus OX=10090 GN=Pygb PE=1 SV=3	50	2932736821	2279195141	1961211476	2176708921	2179073071	1927561290	2140801573	2174327863	2515734745
Q8CIB5	Fermitin family homolog 2 OS=Mus musculus OX=10090 GN=Fermt2 PE=1 SV=1	18	3.30146e+08	3.20436e+08	2.40348e+08	299815353	2.84644e+08	2.46744e+08	2.67086e+08	2.68094e+08	2.64935e+08
Q8CIE6	Coatomer subunit alpha OS=Mus musculus OX=10090 GN=Copa PE=1 SV=2	25	556696804	509774584	4.55202e+08	4.37154e+08	4.68871e+08	373498470	4.4231e+08	4.31849e+08	4.26757e+08
Q8CIG8	Protein arginine N-methyltransferase 5 OS=Mus musculus OX=10090 GN=Prmt5 PE=1 SV=3	11	229595380	193422995	151955220	1.79174e+08	2.02982e+08	1.82817e+08	173183518	1.67792e+08	1.86164e+08
Q8CIN4	Serine/threonine-protein kinase PAK 2 OS=Mus musculus OX=10090 GN=Pak2 PE=1 SV=1	3	6.11172e+07	3.21193e+07	2.69996e+07	5058921		3.37163e+06	1.93538e+07	11932705	1.57561e+07
Q8CIQ7	Dedicator of cytokinesis protein 3 OS=Mus musculus OX=10090 GN=Dock3 PE=1 SV=1	4	2.97051e+07	21532126	22280440	21834134	26456108	2.38296e+07	25084792	1.8577e+07	19128115
Q8CJ19	[F-actin]-monooxygenase MICAL3 OS=Mus musculus OX=10090 GN=Mical3 PE=1 SV=2	2	4.73374e+07	4.64256e+07	20253000	43139115	4.28465e+07	3.04603e+07	3.37552e+07	3.21523e+07	3.5342e+07
Q8CJ61	CKLF-like MARVEL transmembrane domain-containing protein 4 OS=Mus musculus OX=10090 GN=Cmtm4 PE=1 SV=1	1	9776309	10071198	9769912	8989335	11159307	10232907	7366358	7.92943e+06	10784060
Q8CJ67	Double-stranded RNA-binding protein Staufen homolog 2 OS=Mus musculus OX=10090 GN=Stau2 PE=1 SV=1	7	121513434	124015376	1.02832e+08	1.17581e+07	1.32783e+07	6.16176e+06	6.3219e+07	64529128	5.24861e+07
Q8CJ96	Ras association domain-containing protein 8 OS=Mus musculus OX=10090 GN=Rassf8 PE=2 SV=1	1	5.83309e+08	4.69976e+08	4.6145e+08	5.20643e+08	6.04984e+08	5.91127e+08	5.09859e+08	5.75447e+08	636676223
Q8CJF9	Protein argonaute-3 OS=Mus musculus OX=10090 GN=Ago3 PE=2 SV=2	2	14168973	13313562	1.40422e+07	13650503	1.00604e+07	12131648	11272247	8208747	7.36203e+06
Q8CJH3	Plexin-B1 OS=Mus musculus OX=10090 GN=Plxnb1 PE=1 SV=2	3	20131252	1.79798e+07	13596835	1.15605e+07	1.08115e+07	9375144	1.83097e+07	1.57073e+07	16701526
Q8HW98	IgLON family member 5 OS=Mus musculus OX=10090 GN=Iglon5 PE=2 SV=2	1	4818357	5111943
Q8JZK9	Hydroxymethylglutaryl-CoA synthase, cytoplasmic OS=Mus musculus OX=10090 GN=Hmgcs1 PE=1 SV=1	11	3.04337e+08	2.95889e+08	217021735	2.57334e+08	303230124	2.94555e+08	286297811	2.79501e+08	2.82651e+08
Q8JZP2	Synapsin-3 OS=Mus musculus OX=10090 GN=Syn3 PE=1 SV=2	11	137810953	113872029	8.45892e+07	1.1024e+08	128993240	1.13744e+08	1.26211e+08	1.36604e+08	102990843
Q8JZQ9	Eukaryotic translation initiation factor 3 subunit B OS=Mus musculus OX=10090 GN=Eif3b PE=1 SV=1	18	2.74519e+08	276389145	2.20813e+08	2.46459e+08	204383023	2.01451e+08	1.97904e+08	1.91618e+08	1.99637e+08
Q8JZS0	Protein lin-7 homolog A OS=Mus musculus OX=10090 GN=Lin7a PE=1 SV=2	2	7.66052e+07	1.01738e+08	1.76653e+08	1.22442e+08	101096759	2.23038e+08	1.42877e+08	135449341	1.36363e+08
Q8JZS9	39S ribosomal protein L48, mitochondrial OS=Mus musculus OX=10090 GN=Mrpl48 PE=1 SV=1	1	3402535	4642518	2454490	2.62944e+06	2.54874e+06	1.97009e+06	3.33517e+06	2.63074e+06	2.82494e+06
Q8JZW4	Copine-5 OS=Mus musculus OX=10090 GN=Cpne5 PE=1 SV=1	1		4.24846e+06					4.92908e+06	4869309
Q8K010	5-oxoprolinase OS=Mus musculus OX=10090 GN=Oplah PE=1 SV=1	2	2.68724e+07	2.12745e+07	1.66158e+07	4.829e+06	17250294	16588627	1.55126e+07	1.75023e+07	12012111
Q8K012	Formin-binding protein 1-like OS=Mus musculus OX=10090 GN=Fnbp1l PE=1 SV=2	1	13660831	9353992	13025030	5137558
Q8K021	Secretory carrier-associated membrane protein 1 OS=Mus musculus OX=10090 GN=Scamp1 PE=1 SV=1	11	670729598	6.35249e+08	3.89182e+08	5.65737e+08	632803127	4.88132e+08	547834482	577763855	566796674
Q8K0C4	Lanosterol 14-alpha demethylase OS=Mus musculus OX=10090 GN=Cyp51a1 PE=1 SV=1	3	2.87971e+07	3.21937e+07	26701780	27419620	27334128	17561840	2.53745e+07	30619273	29468098
Q8K0C9	GDP-mannose 4,6 dehydratase OS=Mus musculus OX=10090 GN=Gmds PE=1 SV=1	5	5.64165e+07	4.1754e+07	2.29026e+07	3.65089e+07	42675776	3.37518e+07	4.88352e+07	2.8203e+07	4.01067e+07
Q8K0E8	Fibrinogen beta chain OS=Mus musculus OX=10090 GN=Fgb PE=1 SV=1	6	7.44123e+07	74273029	4.33398e+07	83578234	80419154	97071445	7.96378e+07	96309050	8.4233e+07
Q8K0G5	EARP-interacting protein OS=Mus musculus OX=10090 GN=Eipr1 PE=1 SV=2	1	20875392	19956286	13154177	19289872	19612552	17914380	17886908	18241864	20795106
Q8K0S0	Phytanoyl-CoA hydroxylase-interacting protein OS=Mus musculus OX=10090 GN=Phyhip PE=1 SV=1	10	710939445	513525637	3.84371e+08	4.89751e+08	5.29827e+08	4.28503e+08	457128589	473993909	4.42394e+08
Q8K0T0	Reticulon-1 OS=Mus musculus OX=10090 GN=Rtn1 PE=1 SV=1	12	2472982790	1858093744	1350193508	1624951274	1578377639	1368781057	1551849949	1627938515	1601742349
Q8K0U4	Heat shock 70 kDa protein 12A OS=Mus musculus OX=10090 GN=Hspa12a PE=1 SV=1	37	2078058811	1659482319	1350574564	1653028503	1694542175	1564931452	1611587273	1603817293	1639524864
Q8K183	Pyridoxal kinase OS=Mus musculus OX=10090 GN=Pdxk PE=1 SV=1	12	7.71972e+08	6.24106e+08	5.66289e+08	6.33432e+08	4.35907e+08	595549282	635535574	6.05434e+08	558366313
Q8K1A6	Coiled-coil and C2 domain-containing protein 1A OS=Mus musculus OX=10090 GN=Cc2d1a PE=1 SV=2	3	24193322	1.54792e+07	1.59638e+07	4.23238e+06	6691027	3.01693e+06	10174311	9491041	1.12053e+07
Q8K212	Phosphofurin acidic cluster sorting protein 1 OS=Mus musculus OX=10090 GN=Pacs1 PE=1 SV=2	23	429859787	380638327	2.60335e+08	3.29038e+08	3.60253e+08	2.82357e+08	3.32604e+08	3.47001e+08	322468458
Q8K221	Arfaptin-2 OS=Mus musculus OX=10090 GN=Arfip2 PE=1 SV=2	12	505270120	281581130	2.47867e+08	3.44715e+07	1.12323e+07	2.5939e+07	1.72958e+08	141722548	1.50753e+08
Q8K2C9	Very-long-chain (3R)-3-hydroxyacyl-CoA dehydratase 3 OS=Mus musculus OX=10090 GN=Hacd3 PE=1 SV=2	7	240295586	159044918	7.31129e+07	235168608	199917237	154849688	1.6728e+08	156295340	142103334
Q8K2D3	Enhancer of mRNA-decapping protein 3 OS=Mus musculus OX=10090 GN=Edc3 PE=1 SV=1	1	5.2053e+06	5299077	7738888	3.14794e+06	5334785	2.39866e+06	2221450	4.9049e+06	2.39985e+06
Q8K2I1	Protein farnesyltransferase subunit beta OS=Mus musculus OX=10090 GN=Fntb PE=1 SV=1	2	20153398	1.53933e+07	13486058	1.65108e+07	1.72563e+07	13218198	1.80871e+07	22283493	14524784
Q8K2K6	Arf-GAP domain and FG repeat-containing protein 1 OS=Mus musculus OX=10090 GN=Agfg1 PE=1 SV=2	7	264906632	220695260	154518787	1.25702e+08	1.2338e+08	7.78019e+07	1.56766e+08	165400889	163335319
Q8K2L8	Trafficking protein particle complex subunit 12 OS=Mus musculus OX=10090 GN=Trappc12 PE=1 SV=2	1	7310097		2888672				3.16068e+06		2.49061e+06
Q8K2P7	Sodium-coupled neutral amino acid transporter 1 OS=Mus musculus OX=10090 GN=Slc38a1 PE=1 SV=1	2	13098605	1.02636e+07	13218473		1.18543e+07	9.48946e+06	12816432	11508713	9772564
Q8K2Q0	COMM domain-containing protein 9 OS=Mus musculus OX=10090 GN=Commd9 PE=1 SV=3	3	111958838	88489250	48102238		4.9928e+06		13060722	30764510	23038831
Q8K2Q7	BRO1 domain-containing protein BROX OS=Mus musculus OX=10090 GN=Brox PE=1 SV=1	3	2.56214e+07	3.26484e+07	2.03365e+07	2.05243e+07	2.36703e+07	1.91909e+07	1.80802e+07	1.48569e+07	2.44142e+07
Q8K310	Matrin-3 OS=Mus musculus OX=10090 GN=Matr3 PE=1 SV=1	30	760661085	6.99037e+08	4.49139e+08	594122415	6.78147e+08	4.86813e+08	6.07504e+08	5.90151e+08	6.11419e+08
Q8K341	Alpha-tubulin N-acetyltransferase 1 OS=Mus musculus OX=10090 GN=Atat1 PE=1 SV=1	3	5.24158e+07	5.25077e+07	3.67429e+07	3.80417e+07	3.56321e+07	3.61519e+07	3.84198e+07	4.36648e+07	3.80915e+07
Q8K386	Ras-related protein Rab-15 OS=Mus musculus OX=10090 GN=Rab15 PE=1 SV=1	2	5164623	1.61364e+07	16180885	1.47358e+07	1.2884e+07	1.43593e+07	14365313	1.55237e+07	1.65952e+07
Q8K394	Inactive phospholipase C-like protein 2 OS=Mus musculus OX=10090 GN=Plcl2 PE=1 SV=2	9	1.54744e+08	1.22076e+08	66315314	106003211	1.01192e+08	8.76727e+07	1.07012e+08	127466296	125827027
Q8K3A0	Iron-sulfur cluster co-chaperone protein HscB, mitochondrial OS=Mus musculus OX=10090 GN=Hscb PE=1 SV=2	4	90689146	84300734	51111177	5193778	7487602	4.10448e+06	3.20592e+07	4.44095e+07	3.46115e+07
Q8K3E5	Jouberin OS=Mus musculus OX=10090 GN=Ahi1 PE=1 SV=2	22	4.05378e+08	595262318	4.91167e+08	1.15924e+08	7.36716e+07	9.80659e+07	2.84757e+08	2.85222e+08	2.70144e+08
Q8K3G9	DCC-interacting protein 13-beta OS=Mus musculus OX=10090 GN=Appl2 PE=1 SV=1	4	4.41602e+07	4.97636e+07	4.79519e+07	62694632	8.45848e+07	6.05909e+07	50040779	36488481	46244653
Q8K3H0	DCC-interacting protein 13-alpha OS=Mus musculus OX=10090 GN=Appl1 PE=1 SV=1	12	2.01892e+08	153419602	154239254	1.62782e+08	1.60158e+08	1.50574e+08	1.64471e+08	170596724	159683894
Q8K3W0	BRISC and BRCA1-A complex member 2 OS=Mus musculus OX=10090 GN=Babam2 PE=1 SV=2	2	1.79494e+07	1.44125e+07	7.38845e+06	1.11886e+07	8621588	9.56579e+06	1.00795e+07	1.10264e+07	12347903
Q8K400	Syntaxin-binding protein 5 OS=Mus musculus OX=10090 GN=Stxbp5 PE=1 SV=3	11	2.09879e+08	1.52817e+08	1.0094e+08	1.21638e+08	148394248	1.49671e+08	1.43637e+08	148913112	1.46332e+08
Q8K406	Leucine-rich repeat LGI family member 3 OS=Mus musculus OX=10090 GN=Lgi3 PE=1 SV=1	9	190071937	1.43598e+08	8.51534e+07	1.45594e+08	129520639	2.39416e+08	1.25594e+08	1.40194e+08	1.49612e+08
Q8K4G5	Actin-binding LIM protein 1 OS=Mus musculus OX=10090 GN=Ablim1 PE=1 SV=1	10	9.68752e+07	104433978	4.59057e+07	33137130	1.41737e+08	5.3793e+07	54812058	51436035	6.673e+07
Q8K4P8	E3 ubiquitin-protein ligase HECW1 OS=Mus musculus OX=10090 GN=Hecw1 PE=1 SV=3	2	3896777	3.36759e+06	1.58131e+06		3.91022e+06	2.13297e+06	2.79456e+06	2.28105e+06
Q8K4Q0	Regulatory-associated protein of mTOR OS=Mus musculus OX=10090 GN=Rptor PE=1 SV=1	10	1.81942e+08	155571425	1.03694e+08	9.24491e+07	9.08797e+07	106058914	1.24889e+08	125208707	118377209
Q8K4R4	Cytoplasmic phosphatidylinositol transfer protein 1 OS=Mus musculus OX=10090 GN=Pitpnc1 PE=1 SV=1	5	67660233	6.64317e+07	59815177	42454075	6.71396e+07	53348354	61837785	5.69977e+07	56115802
Q8K4X7	1-acyl-sn-glycerol-3-phosphate acyltransferase delta OS=Mus musculus OX=10090 GN=Agpat4 PE=1 SV=1	5	47491714	21700969	28108422	36777145	38921558	3.40317e+07	3.58222e+07	3.83499e+07	3.31682e+07
Q8K4Z0	Leucine-rich repeat LGI family member 2 OS=Mus musculus OX=10090 GN=Lgi2 PE=2 SV=1	1	5.0178e+06					4570318
Q8K596	Sodium/calcium exchanger 2 OS=Mus musculus OX=10090 GN=Slc8a2 PE=1 SV=1	18	769301961	702640650	4.41765e+08	6.93082e+08	7.47602e+08	635713432	648856942	6.45094e+08	6.29436e+08
Q8QZV4	Serine/threonine-protein kinase 32C OS=Mus musculus OX=10090 GN=Stk32c PE=1 SV=1	3	3.21909e+07	2.8111e+07	2.3097e+07	2.69711e+07	2.22323e+07	1.9863e+07	2.4085e+07	39601506	2.7445e+07
Q8QZY1	Eukaryotic translation initiation factor 3 subunit L OS=Mus musculus OX=10090 GN=Eif3l PE=1 SV=1	15	2.2887e+08	172189284	1.55208e+08	139819478	1.36555e+08	1.44893e+08	1.9637e+08	172261265	1.42817e+08
Q8R001	Microtubule-associated protein RP/EB family member 2 OS=Mus musculus OX=10090 GN=Mapre2 PE=1 SV=1	12	4.24777e+08	353536853	3.30798e+08	2.93154e+08	3.589e+08	2.87641e+08	3.11415e+08	3.01949e+08	3.20083e+08
Q8R010	Aminoacyl tRNA synthase complex-interacting multifunctional protein 2 OS=Mus musculus OX=10090 GN=Aimp2 PE=1 SV=2	4	108944806	96729397	66459234	9.15358e+07	1.01394e+08	91715072	9.40644e+07	9.30499e+07	88393569
Q8R016	Bleomycin hydrolase OS=Mus musculus OX=10090 GN=Blmh PE=1 SV=1	5	131124107	87516994	7.97187e+07	8.59471e+07	9.28484e+07	80570728	116136345	94708919	1.0499e+08
Q8R050	Eukaryotic peptide chain release factor GTP-binding subunit ERF3A OS=Mus musculus OX=10090 GN=Gspt1 PE=1 SV=2	11	287291914	2.27468e+08	1.68371e+08	2.5425e+08	360291559	1.89938e+08	3.16559e+08	2.47747e+08	2.05912e+08
Q8R071	Inositol-trisphosphate 3-kinase A OS=Mus musculus OX=10090 GN=Itpka PE=1 SV=1	3	29803111	29761324	27220702	2.17034e+07	2.57222e+07	12865776	2.19502e+07	2.05718e+07	28819642
Q8R081	Heterogeneous nuclear ribonucleoprotein L OS=Mus musculus OX=10090 GN=Hnrnpl PE=1 SV=2	21	9.50786e+08	9.08741e+08	747817092	7.04343e+08	8.72013e+08	7.50042e+08	7.76212e+08	7.65719e+08	7.92584e+08
Q8R0A5	Transcription elongation factor A protein-like 3 OS=Mus musculus OX=10090 GN=Tceal3 PE=1 SV=2	2	14410367	1.89766e+07		1.16734e+07	1.40673e+07	8.87758e+06	1.10326e+07	8.46006e+06	9.7987e+06
Q8R0A7	Uncharacterized protein KIAA0513 OS=Mus musculus OX=10090 GN=Kiaa0513 PE=1 SV=1	6	1.16401e+08	8.48202e+07	5.69686e+07	59366294	50730145	5.13616e+07	53880356	7.20176e+07	6.72616e+07
Q8R0F6	Integrin-linked kinase-associated serine/threonine phosphatase 2C OS=Mus musculus OX=10090 GN=Ilkap PE=1 SV=1	1	8578018	6616557	5645138	7823236	4.37057e+06	5.87876e+06	7064791	8.18545e+06	7.46834e+06
Q8R0P4	Mth938 domain-containing protein OS=Mus musculus OX=10090 GN=Aamdc PE=1 SV=1	3	3.02055e+07	30292290	1.14039e+07	5.04608e+07	40682754	37555546	3.1431e+07	39238307	3.67086e+07
Q8R0S2	IQ motif and SEC7 domain-containing protein 1 OS=Mus musculus OX=10090 GN=Iqsec1 PE=1 SV=2	18	4.61538e+08	390003463	351686857	3.54684e+08	3.92004e+08	3.255e+08	3.55732e+08	3.60853e+08	3.778e+08
Q8R0S4	Voltage-dependent L-type calcium channel subunit beta-4 OS=Mus musculus OX=10090 GN=Cacnb4 PE=1 SV=2	3	31119677	2.19228e+07	1.98174e+07	10994573	1.65901e+07	13674882	21014965	19016007	1.75421e+07
Q8R0X7	Sphingosine-1-phosphate lyase 1 OS=Mus musculus OX=10090 GN=Sgpl1 PE=1 SV=1	1				6174193	8753005	1.01336e+07
Q8R146	Acylamino-acid-releasing enzyme OS=Mus musculus OX=10090 GN=Apeh PE=1 SV=3	8	9.53456e+07	8.69803e+07	52414651	64208051	71253911	6.86105e+07	6.49099e+07	77998511	5.58205e+07
Q8R191	Synaptogyrin-3 OS=Mus musculus OX=10090 GN=Syngr3 PE=1 SV=1	4	5.57944e+08	519470376	5.02652e+08	5.34445e+08	5.73684e+08	4.45214e+08	5.04601e+08	521428105	510010478
Q8R1B4	Eukaryotic translation initiation factor 3 subunit C OS=Mus musculus OX=10090 GN=Eif3c PE=1 SV=1	13	1.42986e+08	125408835	9.43589e+07	6.85437e+07	7.82859e+07	7.42124e+07	8.89932e+07	1.08297e+08	9.90147e+07
Q8R1F6	Protein HID1 OS=Mus musculus OX=10090 GN=Hid1 PE=1 SV=1	2	1.49273e+07	1.15659e+07	1.17715e+07	10740322	5.76439e+06	1.86628e+07	15168072	11106995	11432894
Q8R1N4	NudC domain-containing protein 3 OS=Mus musculus OX=10090 GN=Nudcd3 PE=1 SV=3	1	3.91036e+06	1.94501e+06			2.51976e+06	1.43867e+06		2.3195e+06
Q8R1Q8	Cytoplasmic dynein 1 light intermediate chain 1 OS=Mus musculus OX=10090 GN=Dync1li1 PE=1 SV=1	15	437355167	337164466	2.03704e+08	2.19186e+08	212553220	1.766e+08	2.6319e+08	2.851e+08	280902173
Q8R2R9	AP-3 complex subunit mu-2 OS=Mus musculus OX=10090 GN=Ap3m2 PE=1 SV=1	10	2.03415e+08	135834863	1.34895e+08	1.85275e+08	1.72079e+08	149878019	154134833	155225571	160353192
Q8R2U0	Nucleoporin SEH1 OS=Mus musculus OX=10090 GN=Seh1l PE=2 SV=1	4	5.57334e+07	6.26009e+07	6.64715e+07	52437285	6.65781e+07	8.61705e+07	8.43304e+07	78413133	75099889
Q8R2Y0	Monoacylglycerol lipase ABHD6 OS=Mus musculus OX=10090 GN=Abhd6 PE=1 SV=1	8	1.34537e+08	103026517	8.22831e+07	117092437	1.00372e+08	9.34131e+07	9.53989e+07	1.01412e+08	8.95892e+07
Q8R2Y2	Cell surface glycoprotein MUC18 OS=Mus musculus OX=10090 GN=Mcam PE=1 SV=1	3	2.0018e+07	1.50016e+07	9.25279e+06	1.41467e+07	1.13391e+07	6855180	1.86424e+07	13975846	1.10616e+07
Q8R307	Vacuolar protein sorting-associated protein 18 homolog OS=Mus musculus OX=10090 GN=Vps18 PE=1 SV=2	5	3.94948e+07	40460211	3.49417e+07	4.22668e+07	48990466	33871411	47626700	4.0317e+07	5.04708e+07
Q8R326	Paraspeckle component 1 OS=Mus musculus OX=10090 GN=Pspc1 PE=1 SV=1	10	168576826	109425071	7.35831e+07	70918308	7.18973e+07	41233546	9.209e+07	8.52122e+07	74342978
Q8R361	Rab11 family-interacting protein 5 OS=Mus musculus OX=10090 GN=Rab11fip5 PE=1 SV=2	4	43910340	30129984	2.53932e+07	1.81001e+07	1.46199e+07	11981510	1.54539e+07	18489608	1.87025e+07
Q8R366	Immunoglobulin superfamily member 8 OS=Mus musculus OX=10090 GN=Igsf8 PE=1 SV=2	11	7.91403e+08	592291750	5.40814e+08	6.93735e+08	741003099	5.56094e+08	6.64334e+08	5.97763e+08	5.99552e+08
Q8R3P0	Aspartoacylase OS=Mus musculus OX=10090 GN=Aspa PE=1 SV=2	3	38258744	17120426	1.55383e+07	21385393	23178868	27758846	2.7608e+07	24716558	1.52708e+07
Q8R3Q2	Serine/threonine-protein phosphatase 6 regulatory subunit 2 OS=Mus musculus OX=10090 GN=Ppp6r2 PE=1 SV=1	10	212552770	150669674	105588734	5.82126e+07	4.77398e+07	4.46022e+07	8.5441e+07	1.02301e+08	112652187
Q8R3Q6	Coiled-coil domain-containing protein 58 OS=Mus musculus OX=10090 GN=Ccdc58 PE=1 SV=1	1	34439811	18359859	24379148	31051732	18935626	24523256	18965760	23368758	18237974
Q8R3V5	Endophilin-B2 OS=Mus musculus OX=10090 GN=Sh3glb2 PE=1 SV=2	10	1.37339e+08	140861852	8.32363e+07	8.62804e+07	105647829	68758499	1.01304e+08	9.54965e+07	112736798
Q8R464	Cell adhesion molecule 4 OS=Mus musculus OX=10090 GN=Cadm4 PE=1 SV=1	9	184425806	1.72156e+08	1.30007e+08	1.79581e+08	1.78875e+08	150952678	1.68492e+08	1.62415e+08	1.64691e+08
Q8R4E6	Purine-rich element-binding protein gamma OS=Mus musculus OX=10090 GN=Purg PE=1 SV=1	2	1.47861e+07	6194794	3.22507e+06	7260032	5.64893e+06	2.82343e+06	7174918	6437250	7.39774e+06
Q8R4G0	Netrin-G1 OS=Mus musculus OX=10090 GN=Ntng1 PE=1 SV=2	1	4502553	4231000	4208020	3.24722e+06		4.36223e+06	1.87075e+06	4672012	3.64299e+06
Q8R4H2	Rho guanine nucleotide exchange factor 12 OS=Mus musculus OX=10090 GN=Arhgef12 PE=1 SV=2	1	7.3346e+06	4494510	3.30852e+06	3.71736e+06	4990910	3.17363e+06	3.91252e+06	4.48081e+06	4.82048e+06
Q8R550	SH3 domain-containing kinase-binding protein 1 OS=Mus musculus OX=10090 GN=Sh3kbp1 PE=1 SV=1	10	308001915	2.11047e+08	131441804	26723185	7.39894e+06	27034420	1.1458e+08	1.21228e+08	79876192
Q8R555	Cartilage acidic protein 1 OS=Mus musculus OX=10090 GN=Crtac1 PE=2 SV=1	1	7791859	4897071	4838804	5590479	4.83413e+06	4395354	7146118	5.67827e+06	4973935
Q8R570	Synaptosomal-associated protein 47 OS=Mus musculus OX=10090 GN=Snap47 PE=1 SV=1	18	544519928	4.41946e+08	1.94613e+08	309681398	3.06005e+08	2.47216e+08	3.00684e+08	268955647	3.05223e+08
Q8R574	Phosphoribosyl pyrophosphate synthase-associated protein 2 OS=Mus musculus OX=10090 GN=Prpsap2 PE=1 SV=1	6	9.05031e+08	6.54715e+08	6.68043e+08	1095836132	1233004500	1108944899	7.92588e+08	1017037253	7.60104e+08
Q8R5A3	Amyloid beta A4 precursor protein-binding family B member 1-interacting protein OS=Mus musculus OX=10090 GN=Apbb1ip PE=1 SV=2	1	13767899	12059222	9870305	9805460	8645228	8770138	11397408	9967438	9995324
Q8R5C5	Beta-centractin OS=Mus musculus OX=10090 GN=Actr1b PE=1 SV=1	4	34687222	4.42775e+07	30573100	43974371	59643647	4.99329e+07	45488866	4.58463e+07	5.7809e+07
Q8R5H1	Ubiquitin carboxyl-terminal hydrolase 15 OS=Mus musculus OX=10090 GN=Usp15 PE=1 SV=1	8	95772061	69713097	4.1632e+07	66883638	6.08357e+07	51704517	7.00733e+07	5.78025e+07	58991518
Q8R5H6	Wiskott-Aldrich syndrome protein family member 1 OS=Mus musculus OX=10090 GN=Wasf1 PE=1 SV=2	9	1.3731e+08	1.07835e+08	72110685	6.88486e+07	7.05965e+07	5.6172e+07	92411788	98756141	100176416
Q8R5J9	PRA1 family protein 3 OS=Mus musculus OX=10090 GN=Arl6ip5 PE=1 SV=2	3	6.06553e+07	5.74958e+07	35136040	61191585	6.83617e+07	51420686	53045854	5.365e+07	57808178
Q8R5M8	Cell adhesion molecule 1 OS=Mus musculus OX=10090 GN=Cadm1 PE=1 SV=2	6	116315123	99476357	7.85995e+07	107342959	113884335	98187152	105400313	104268078	101195109
Q8VBT0	Thioredoxin-related transmembrane protein 1 OS=Mus musculus OX=10090 GN=Tmx1 PE=1 SV=1	1	6624143	6524049	4703337	4829635	4.69373e+06	4231665	4176955	7.09228e+06	4.65495e+06
Q8VBT9	Tether containing UBX domain for GLUT4 OS=Mus musculus OX=10090 GN=Aspscr1 PE=1 SV=1	5	6.6659e+07	5.54428e+07	3.05869e+07	38149749	4.4889e+07	38234385	46211328	41851415	4.40449e+07
Q8VBW6	NEDD8-activating enzyme E1 regulatory subunit OS=Mus musculus OX=10090 GN=Nae1 PE=1 SV=1	7	132765447	110197602	59179167	102674121	1.16407e+08	8.63925e+07	8.7349e+07	9.98613e+07	1.05296e+08
Q8VBZ3	Cleft lip and palate transmembrane protein 1 homolog OS=Mus musculus OX=10090 GN=Clptm1 PE=1 SV=1	8	78053855	94666170	7.19343e+07	8.39148e+07	73947260	7.65602e+07	8.01139e+07	7.85483e+07	8.5657e+07
Q8VC30	Triokinase/FMN cyclase OS=Mus musculus OX=10090 GN=Tkfc PE=1 SV=1	1	11147607	12828756	10026370	15796578	17024724	10639868	14760427	11187989	9131495
Q8VC42	Regulator of MON1-CCZ1 complex OS=Mus musculus OX=10090 GN=Rmc1 PE=2 SV=1	1	12630187	7.83024e+06	3.67295e+06	4.00086e+06				3.85688e+06	11402187
Q8VCC9	Spondin-1 OS=Mus musculus OX=10090 GN=Spon1 PE=1 SV=1	2	17443816	30536462	1.55353e+07	20526214	20063973	9561519	25044794	16798308	1.87954e+07
Q8VCE2	GPN-loop GTPase 1 OS=Mus musculus OX=10090 GN=Gpn1 PE=1 SV=1	4	66595854	72524772	53230241	1.78975e+06			2.94271e+07	2.69834e+07	2.95501e+07
Q8VCH6	Delta(24)-sterol reductase OS=Mus musculus OX=10090 GN=Dhcr24 PE=1 SV=1	1			4.82919e+06				3.00373e+06
Q8VCM7	Fibrinogen gamma chain OS=Mus musculus OX=10090 GN=Fgg PE=1 SV=1	5	3.71763e+07	2.45717e+07	19680060	54678659	1.59561e+07	43383569	18905959	2.43869e+07	48008965
Q8VCM8	Nicalin OS=Mus musculus OX=10090 GN=Ncln PE=1 SV=2	5	6.81358e+07	50079483	4.61874e+07	5.00011e+07	48333793	4.84567e+07	5.05879e+07	49802949	4.5142e+07
Q8VCT3	Aminopeptidase B OS=Mus musculus OX=10090 GN=Rnpep PE=1 SV=2	12	2.90469e+08	3.10826e+08	1.95918e+08	373766141	316465512	2.69419e+08	2.78975e+08	3.30596e+08	3.58736e+08
Q8VD37	SH3-containing GRB2-like protein 3-interacting protein 1 OS=Mus musculus OX=10090 GN=Sgip1 PE=1 SV=1	20	8.77599e+08	842241720	4.97041e+08	8.23054e+08	8.03069e+08	5.17109e+08	757065773	7.12292e+08	7.38312e+08
Q8VD62	UPF0696 protein C11orf68 homolog OS=Mus musculus OX=10090 GN=Bles03 PE=1 SV=1	1	8116687	8927066	3.97439e+06	8203652	7988994	7.84273e+06	8708150	7.32688e+06	6.51558e+06
Q8VD65	Phosphoinositide 3-kinase regulatory subunit 4 OS=Mus musculus OX=10090 GN=Pik3r4 PE=1 SV=3	5	69291562	17626124	5.83055e+07	7.19411e+07	84618912	1.59354e+08	8.26425e+07	73054651	7.6104e+07
Q8VDD5	Myosin-9 OS=Mus musculus OX=10090 GN=Myh9 PE=1 SV=4	23	206937453	1.90003e+08	134155520	1.6569e+08	140283004	1.80726e+08	1.95427e+08	1.80706e+08	1.8962e+08
Q8VDD8	WASH complex subunit 1 OS=Mus musculus OX=10090 GN=Washc1 PE=1 SV=1	36	24269381515	15318839490	13517176843	1.25795e+08	149959683	9.42953e+07	7799302895	7990670208	8106350106
Q8VDH1	F-box only protein 21 OS=Mus musculus OX=10090 GN=Fbxo21 PE=1 SV=1	1	7.44855e+06	4.66241e+06	4638770	8.07005e+06	7.44433e+06	4923603	6.00994e+06	5528591	6.72346e+06
Q8VDJ3	Vigilin OS=Mus musculus OX=10090 GN=Hdlbp PE=1 SV=1	9	164926275	1.26943e+08	95369407	2.02401e+07	3.63381e+07	3.4275e+07	7.54019e+07	8.09709e+07	79147801
Q8VDM4	26S proteasome non-ATPase regulatory subunit 2 OS=Mus musculus OX=10090 GN=Psmd2 PE=1 SV=1	22	523051248	439668527	3.78862e+08	4.27163e+08	424870711	3.8044e+08	3.77857e+08	4.55056e+08	4.04362e+08
Q8VDM6	Heterogeneous nuclear ribonucleoprotein U-like protein 1 OS=Mus musculus OX=10090 GN=Hnrnpul1 PE=1 SV=1	2	21373752	1.58023e+07	9766565	1.61742e+07	24790683	14722814	1.27015e+07	12746471	1.55802e+07
Q8VDN2	Sodium/potassium-transporting ATPase subunit alpha-1 OS=Mus musculus OX=10090 GN=Atp1a1 PE=1 SV=1	34	4018770074	2759660092	2004040643	2955299054	2958144529	2898186381	2839327102	2877807992	2864172794
Q8VDP4	Cell cycle and apoptosis regulator protein 2 OS=Mus musculus OX=10090 GN=Ccar2 PE=1 SV=2	13	1.47913e+08	148540420	1.29159e+08	1.44877e+08	145853718	1.24541e+08	1.5196e+08	139849302	1.36732e+08
Q8VDP6	CDP-diacylglycerol--inositol 3-phosphatidyltransferase OS=Mus musculus OX=10090 GN=Cdipt PE=1 SV=1	3	82894294	4.40186e+07	2.48107e+07	87047929	63345145	4.58956e+07	57810459	58862862	6.55235e+07
Q8VDQ1	Prostaglandin reductase 2 OS=Mus musculus OX=10090 GN=Ptgr2 PE=1 SV=2	4	103632939	8.26765e+07	3.26032e+07	7.01865e+07	2.39807e+07	6.35828e+07	5.91281e+07	6.19258e+07	6.16736e+07
Q8VDQ8	NAD-dependent protein deacetylase sirtuin-2 OS=Mus musculus OX=10090 GN=Sirt2 PE=1 SV=2	16	916301663	6.99797e+08	7.3862e+08	653237337	636643029	5.73331e+08	670835994	6.77165e+08	6.91618e+08
Q8VDU5	SNF-related serine/threonine-protein kinase OS=Mus musculus OX=10090 GN=Snrk PE=1 SV=1	1		15174045					11030259
Q8VE19	GATOR complex protein MIOS OS=Mus musculus OX=10090 GN=Mios PE=1 SV=2	1	6535386	3.73142e+06	3.19265e+06	2.48594e+06	3.79959e+06	3848720	4264116	3.07675e+06	3.76751e+06
Q8VE33	Ganglioside-induced differentiation-associated protein 1-like 1 OS=Mus musculus OX=10090 GN=Gdap1l1 PE=1 SV=1	13	374595018	3.12287e+08	207329650	2.9021e+08	3.34736e+08	2.3508e+08	256117159	2.99998e+08	3.12309e+08
Q8VE47	Ubiquitin-like modifier-activating enzyme 5 OS=Mus musculus OX=10090 GN=Uba5 PE=1 SV=2	8	176007834	1.38269e+08	9.27133e+07	116575902	1.28377e+08	99578642	1.02977e+08	1.08383e+08	1.07386e+08
Q8VE62	Polyadenylate-binding protein-interacting protein 1 OS=Mus musculus OX=10090 GN=Paip1 PE=1 SV=1	1	9567428	7023828	2521715	4.12197e+06	3807362	4.23841e+06	4.02836e+06	5588732	3856674
Q8VED9	Galectin-related protein OS=Mus musculus OX=10090 GN=Lgalsl PE=1 SV=1	4	2.59855e+08	303487518	114447475	336398276	3.49098e+08	264565236	278432054	274307005	2.8813e+08
Q8VEH3	ADP-ribosylation factor-like protein 8A OS=Mus musculus OX=10090 GN=Arl8a PE=1 SV=1	3	116218268	116497662	7.67462e+07	108406088	127387582	87109070	116461680	1.16312e+08	119287674
Q8VEH5	EPM2A-interacting protein 1 OS=Mus musculus OX=10090 GN=Epm2aip1 PE=1 SV=1	6	64306730	4.08762e+07	4.07219e+07	3.06149e+07	3.46925e+07	24316046	8.40839e+07	35728021	27376648
Q8VEH8	Endoplasmic reticulum lectin 1 OS=Mus musculus OX=10090 GN=Erlec1 PE=1 SV=1	1	25469122	14786164		7.66957e+06	8395210	11195510	4324256	12230350	6.11443e+06
Q8VEK0	Cell cycle control protein 50A OS=Mus musculus OX=10090 GN=Tmem30a PE=1 SV=1	3	149206493	1.54104e+08	103255380	9.32365e+07	97682934	88677213	122825714	114807232	1.05414e+08
Q8VEK3	Heterogeneous nuclear ribonucleoprotein U OS=Mus musculus OX=10090 GN=Hnrnpu PE=1 SV=1	25	1883889847	1562858823	1247547536	1294518806	1528037429	1166430725	1318651208	1515923288	1311274783
Q8VHH5	Arf-GAP with GTPase, ANK repeat and PH domain-containing protein 3 OS=Mus musculus OX=10090 GN=Agap3 PE=1 SV=1	11	208709771	184988702	1.21495e+08	173507533	1.78519e+08	1.39794e+08	1.62488e+08	1.79484e+08	1.78582e+08
Q8VHJ5	Serine/threonine-protein kinase MARK1 OS=Mus musculus OX=10090 GN=Mark1 PE=1 SV=2	12	365468220	198815929	1.45935e+08	1.40041e+08	1.08874e+08	1.19858e+08	1.68249e+08	165073114	171792969
Q8VHK5	Membrane protein MLC1 OS=Mus musculus OX=10090 GN=Mlc1 PE=1 SV=1	3	20844402	1.1163e+07	19838282	19469205	2.18451e+07	1.82407e+07	2.41821e+07	21263578	2.60738e+07
Q8VHK9	ATP-dependent RNA helicase DHX36 OS=Mus musculus OX=10090 GN=Dhx36 PE=1 SV=2	1	3.40307e+06	3.27806e+06	3.05627e+06	4.54596e+06	4.50933e+06	2.39891e+06	3915985	4.72451e+06	5072039
Q8VHL1	Histone-lysine N-methyltransferase SETD7 OS=Mus musculus OX=10090 GN=Setd7 PE=1 SV=2	2	36933274	28496109	1.2526e+07	18958659	28453865	16159302	21285850	23269013	1.8955e+07
Q8VHQ9	Acyl-coenzyme A thioesterase 11 OS=Mus musculus OX=10090 GN=Acot11 PE=1 SV=1	6	120596925	86920457	5.40437e+07	110234091	114202943	78007500	9.55696e+07	9.11102e+07	7.34242e+07
Q8VHR5	Transcriptional repressor p66-beta OS=Mus musculus OX=10090 GN=Gatad2b PE=1 SV=1	1	3994763		2.81957e+06		2949312		2.60743e+06	5.69067e+06	2.76919e+06
Q8VHW2	Voltage-dependent calcium channel gamma-8 subunit OS=Mus musculus OX=10090 GN=Cacng8 PE=1 SV=1	5	98095878	81839906	57638725	64324833	6.0148e+07	5.39603e+07	67098293	70973284	64196436
Q8VHY0	Chondroitin sulfate proteoglycan 4 OS=Mus musculus OX=10090 GN=Cspg4 PE=1 SV=3	2	2.75095e+07	31723950	2.32503e+07	28850748	37757136	2.99671e+07	3.55089e+07	3.1217e+07	32998847
Q8VIJ6	Splicing factor, proline- and glutamine-rich OS=Mus musculus OX=10090 GN=Sfpq PE=1 SV=1	17	5.64724e+08	432523544	3.63512e+08	3.95101e+08	3.86467e+08	3.29151e+08	3.82092e+08	391154548	388506683
Q8WTY4	Anamorsin OS=Mus musculus OX=10090 GN=Ciapin1 PE=1 SV=1	9	4.36961e+08	3.09107e+08	1.5742e+08	6.23768e+07	39323684	3.59921e+07	1.63845e+08	1.57566e+08	125620366
Q91V09	WD repeat-containing protein 13 OS=Mus musculus OX=10090 GN=Wdr13 PE=1 SV=1	8	1.01116e+08	6.74549e+07	98788025	8.06835e+07	77375396	7.49704e+07	7.22304e+07	85838073	8.86386e+07
Q91V12	Cytosolic acyl coenzyme A thioester hydrolase OS=Mus musculus OX=10090 GN=Acot7 PE=1 SV=2	18	2643176557	2429727809	1942175456	2544563733	2839540070	2151228806	2270120488	2378854565	2407783602
Q91V14	Solute carrier family 12 member 5 OS=Mus musculus OX=10090 GN=Slc12a5 PE=1 SV=2	25	2310382891	1508659296	1163295331	1934722821	1573961265	1546327120	1664515833	1609516795	1614958251
Q91V36	Nuclear receptor-binding protein 2 OS=Mus musculus OX=10090 GN=Nrbp2 PE=1 SV=2	2	11978762	12602380	3999519	12067195	1.02985e+07	8.1353e+06	1.05206e+07	1.29867e+07	11023927
Q91V41	Ras-related protein Rab-14 OS=Mus musculus OX=10090 GN=Rab14 PE=1 SV=3	20	2250061312	1824190887	1689622543	1798682066	1868622748	1636842566	1820191617	1778015587	1783473423
Q91V57	N-chimaerin OS=Mus musculus OX=10090 GN=Chn1 PE=1 SV=2	1	9100668	9065144	12860953	11265776	11411094	8471937	10787826	10481718	11656105
Q91V64	Isochorismatase domain-containing protein 1 OS=Mus musculus OX=10090 GN=Isoc1 PE=1 SV=1	3	46303955	50269979	46409350	35410094	44826467	40177789	54819773	47443442	44909389
Q91V76	Ester hydrolase C11orf54 homolog OS=Mus musculus OX=10090 PE=1 SV=1	4	33692318	37086285	37543970	43272663	42578458	3.03505e+07	36307311	3.21936e+07	2.82382e+07
Q91V92	ATP-citrate synthase OS=Mus musculus OX=10090 GN=Acly PE=1 SV=1	42	1655555102	1476205154	1328002070	1270527547	1397296108	1281025524	1306136646	1322379004	1330396162
Q91VC3	Eukaryotic initiation factor 4A-III OS=Mus musculus OX=10090 GN=Eif4a3 PE=1 SV=3	10	1.13702e+08	9.8003e+07	7.14009e+07	5.31991e+07	8.84831e+07	8.35412e+07	9.61035e+07	99471393	7.41032e+07
Q91VE0	Long-chain fatty acid transport protein 4 OS=Mus musculus OX=10090 GN=Slc27a4 PE=1 SV=1	13	202776106	162733831	1.35932e+08	1.69406e+08	1.78681e+08	1.71453e+08	147292837	1.59804e+08	1.65718e+08
Q91VH6	Protein MEMO1 OS=Mus musculus OX=10090 GN=Memo1 PE=1 SV=1	2	19314312	20670068	1.74573e+07	15576220	6707375	4.05362e+06	1.75937e+07	6.50121e+06	4700030
Q91VI7	Ribonuclease inhibitor OS=Mus musculus OX=10090 GN=Rnh1 PE=1 SV=1	4	5.13368e+07	33808969	2.04901e+07	33332716	14881132	17661880	1.96565e+07	33626091	27833696
Q91VK4	Integral membrane protein 2C OS=Mus musculus OX=10090 GN=Itm2c PE=1 SV=2	1	18198312	17286524	17876842	22331000	21642792	15709616	16137659	18015020	20842206
Q91VM9	Inorganic pyrophosphatase 2, mitochondrial OS=Mus musculus OX=10090 GN=Ppa2 PE=1 SV=1	3	3.8603e+07	3.19595e+07	28820544	2.33107e+07	2.30616e+07	1.89657e+07	1.98989e+07	2.10788e+07	1.89647e+07
Q91VN4	MICOS complex subunit Mic25 OS=Mus musculus OX=10090 GN=Chchd6 PE=1 SV=2	2	1.29853e+07	1.42297e+07	1.66862e+07	6.48139e+06	1.20092e+07	1.19647e+07	1.52978e+07	1.45664e+07	1.41576e+07
Q91VR2	ATP synthase subunit gamma, mitochondrial OS=Mus musculus OX=10090 GN=Atp5f1c PE=1 SV=1	14	3258401306	2122030283	1858145924	2034489691	2674876789	3305502189	2441849037	2326767133	2269776528
Q91VR5	ATP-dependent RNA helicase DDX1 OS=Mus musculus OX=10090 GN=Ddx1 PE=1 SV=1	17	400110595	307636032	2.71142e+08	3.34156e+08	373670965	295091105	3.04816e+08	3.06855e+08	2.67589e+08
Q91VR7	Microtubule-associated proteins 1A/1B light chain 3A OS=Mus musculus OX=10090 GN=Map1lc3a PE=1 SV=1	3	127349626	106545310	81814033	105690489	114245732	90659364	129887414	91347046	100442391
Q91VW3	SH3 domain-binding glutamic acid-rich-like protein 3 OS=Mus musculus OX=10090 GN=Sh3bgrl3 PE=1 SV=1	1	10689911	10541418	9186065	13222564	11966257	6.37643e+06	8544910	11114220	8603554
Q91VX2	Ubiquitin-associated protein 2 OS=Mus musculus OX=10090 GN=Ubap2 PE=1 SV=1	3	1.45504e+07	1.59988e+07	1.02051e+07	1.72114e+06	3.01062e+06	8.64356e+06	1.50454e+07	5.24456e+06	4.56194e+06
Q91VZ6	Stromal membrane-associated protein 1 OS=Mus musculus OX=10090 GN=Smap1 PE=1 SV=1	7	4.5516e+08	4.68635e+08	2.55091e+08	203029629	225675824	2.0737e+08	275324145	3.2138e+08	2.74835e+08
Q91W39	Nuclear receptor coactivator 5 OS=Mus musculus OX=10090 GN=Ncoa5 PE=1 SV=1	3	32116959	31691884	1.38167e+07	14620941	37764109	43374362	1.91647e+07	14153929	3.20563e+07
Q91W50	Cold shock domain-containing protein E1 OS=Mus musculus OX=10090 GN=Csde1 PE=1 SV=1	17	530530447	458393475	2.85955e+08	2.50181e+08	291004245	2.30535e+08	2.99557e+08	3.22371e+08	334724819
Q91W86	Vacuolar protein sorting-associated protein 11 homolog OS=Mus musculus OX=10090 GN=Vps11 PE=1 SV=3	9	156295450	185306581	43538060	182623346	195002142	1.16753e+08	122139875	4.96945e+07	127197062
Q91W89	Alpha-mannosidase 2C1 OS=Mus musculus OX=10090 GN=Man2c1 PE=1 SV=1	5	3.87993e+07	2.54408e+07	20559807	36369921	2.56797e+07	31933981	2.42159e+07	23619976	2.97931e+07
Q91WA3	Histone deacetylase 11 OS=Mus musculus OX=10090 GN=Hdac11 PE=1 SV=1	1	9965089	4310391	5.92577e+06	5.88277e+06	4.40394e+06	4.88584e+06	3.63508e+06	8894141	8.55576e+06
Q91WC0	Histone-lysine N-methyltransferase setd3 OS=Mus musculus OX=10090 GN=Setd3 PE=1 SV=1	3	1.3941e+07	1.10821e+07	8.99917e+06	6.69616e+06	8166663	1.02556e+07	7.95826e+06	1.54069e+07	1.45985e+07
Q91WC3	Long-chain-fatty-acid--CoA ligase 6 OS=Mus musculus OX=10090 GN=Acsl6 PE=1 SV=1	33	1277257820	1043045502	910062519	1174438771	1165814457	9.64079e+08	1058879929	1090057363	1118840038
Q91WG7	Diacylglycerol kinase gamma OS=Mus musculus OX=10090 GN=Dgkg PE=1 SV=1	3	45393335	34281059	30905430	6.82394e+07	34185171	2.48448e+07	3.05474e+07	3.01479e+07	3.00061e+07
Q91WJ8	Far upstream element-binding protein 1 OS=Mus musculus OX=10090 GN=Fubp1 PE=1 SV=1	4	2.51321e+07	2.15203e+07	9.24822e+06	1.57077e+07	25119212	1.52508e+07	18597133	19236675	1.59198e+07
Q91WK2	Eukaryotic translation initiation factor 3 subunit H OS=Mus musculus OX=10090 GN=Eif3h PE=1 SV=1	9	152664442	1.40461e+08	1.07913e+08	1.48178e+08	1.401e+08	1.29554e+08	1.25681e+08	1.24341e+08	1.20623e+08
Q91WQ3	Tyrosine--tRNA ligase, cytoplasmic OS=Mus musculus OX=10090 GN=Yars PE=1 SV=3	15	166259642	170035112	9.26895e+07	1.57455e+08	1.8706e+08	1.11619e+08	170579734	1.66905e+08	1.63057e+08
Q91WT9	Cystathionine beta-synthase OS=Mus musculus OX=10090 GN=Cbs PE=1 SV=3	6	64162763	58287238	6.20025e+07	44667156	41261475	4.22236e+07	45833872	47536450	51638811
Q91X72	Hemopexin OS=Mus musculus OX=10090 GN=Hpx PE=1 SV=2	2	1.24194e+07	1.33454e+07	10810726	8.97798e+06	12733136	4.59987e+06	9.93799e+06	6993168	1.15929e+07
Q91X96	Guanine nucleotide exchange factor MSS4 OS=Mus musculus OX=10090 GN=Rabif PE=1 SV=1	2	36017206	35317563	1.94446e+07	21938158	21337724	20099328	21593578	18749306	2.00187e+07
Q91X97	Neurocalcin-delta OS=Mus musculus OX=10090 GN=Ncald PE=1 SV=4	4	99889756	6.86978e+07	10533007	34158220	3.34978e+07	28569656	35537731	42852481	4.70084e+07
Q91XD6	Vacuolar protein-sorting-associated protein 36 OS=Mus musculus OX=10090 GN=Vps36 PE=1 SV=1	2	8.36029e+06	1.20838e+07	1.36404e+07	8.11028e+06	8.12869e+06	7.14436e+06	5203715	5752462	9409640
Q91XL9	Oxysterol-binding protein-related protein 1 OS=Mus musculus OX=10090 GN=Osbpl1a PE=1 SV=2	8	1.9801e+08	159218684	1.61462e+08	114311466	123629321	140019308	9.82677e+07	99054517	1.31705e+08
Q91XM9	Disks large homolog 2 OS=Mus musculus OX=10090 GN=Dlg2 PE=1 SV=2	36	1318849423	1034901702	6.90759e+08	4.58733e+08	5.02135e+08	3.99429e+08	6.28487e+08	6.87245e+08	6.9084e+08
Q91XU0	ATPase WRNIP1 OS=Mus musculus OX=10090 GN=Wrnip1 PE=1 SV=2	1	9453972	6.48003e+06	7478861	6823856	5093159	5.25561e+06		7323992	5.23966e+06
Q91XU3	Phosphatidylinositol 5-phosphate 4-kinase type-2 gamma OS=Mus musculus OX=10090 GN=Pip4k2c PE=1 SV=1	4	36781753	12345829	1.70477e+07	6.12211e+06	3.79212e+06	1.98166e+07	7.99747e+06	2.03385e+07	2.25492e+07
Q91XV3	Brain acid soluble protein 1 OS=Mus musculus OX=10090 GN=Basp1 PE=1 SV=3	14	6.00538e+08	4.38251e+08	1.25894e+08	1.08377e+08	1.15815e+08	6.82211e+07	2.07158e+08	2.28625e+08	229099262
Q91Y11	Protocadherin alpha-9 OS=Mus musculus OX=10090 GN=Pcdha9 PE=2 SV=1	1	4820083	6.25644e+06				3.21038e+06		2.88301e+06	3654230
Q91Y86	Mitogen-activated protein kinase 8 OS=Mus musculus OX=10090 GN=Mapk8 PE=1 SV=1	2	31677269	27285110	20448212	25707617	25710773	22094949	27140991	26393538	28462695
Q91Y97	Fructose-bisphosphate aldolase B OS=Mus musculus OX=10090 GN=Aldob PE=1 SV=3	1	182781804	163029504	162405876	139853200	97463584	69253976	109461048	110917060	145090616
Q91YD9	Neural Wiskott-Aldrich syndrome protein OS=Mus musculus OX=10090 GN=Wasl PE=1 SV=1	9	1.85471e+08	1.47275e+08	105540033	1.25446e+08	99356674	1.0454e+08	121769108	1.29015e+08	1.31429e+08
Q91YE6	Importin-9 OS=Mus musculus OX=10090 GN=Ipo9 PE=1 SV=3	2	1.13647e+07	1.6142e+07	6.68225e+06	9482300	12960497	7.7306e+06	1.19033e+07	1.38671e+07	1.10966e+07
Q91YJ2	Sorting nexin-4 OS=Mus musculus OX=10090 GN=Snx4 PE=1 SV=1	1	10396306	8939799	8.18268e+06	5.07653e+06	7.29423e+06	5.46404e+06	8.19936e+06	8.11592e+06	8944439
Q91YM2	Rho GTPase-activating protein 35 OS=Mus musculus OX=10090 GN=Arhgap35 PE=1 SV=3	13	7.02399e+08	699160772	6.91913e+08	6.9627e+08	6.12221e+08	7.43158e+08	6.8056e+08	6.99352e+08	6.83641e+08
Q91YN5	UDP-N-acetylhexosamine pyrophosphorylase OS=Mus musculus OX=10090 GN=Uap1 PE=1 SV=1	1	6852601	6204496	9004442	4.11688e+06	7.44161e+06	4739093	5321062	4449053	3.61483e+06
Q91YQ3	Cold shock domain-containing protein C2 OS=Mus musculus OX=10090 GN=Csdc2 PE=1 SV=2	1	3797712	5.04854e+06				2.94454e+06			3.41595e+06
Q91YQ5	Dolichyl-diphosphooligosaccharide--protein glycosyltransferase subunit 1 OS=Mus musculus OX=10090 GN=Rpn1 PE=1 SV=1	18	5.15598e+08	3.56335e+08	251387221	3.63393e+08	3.3591e+08	3.55131e+08	3.30392e+08	3.03069e+08	3.24428e+08
Q91YR1	Twinfilin-1 OS=Mus musculus OX=10090 GN=Twf1 PE=1 SV=2	8	164023582	1.06652e+08	123809754	1.06695e+08	93503101	9.63749e+07	1.13734e+08	1.13105e+08	1.09546e+08
Q91YS8	Calcium/calmodulin-dependent protein kinase type 1 OS=Mus musculus OX=10090 GN=Camk1 PE=1 SV=1	1		5549188	5337492	6.01594e+06	4.37198e+06			3927302	4.76454e+06
Q91YT7	YTH domain-containing family protein 2 OS=Mus musculus OX=10090 GN=Ythdf2 PE=1 SV=1	4	41198663	3.58889e+07	20142763	2.95058e+07	4.36684e+07	27718734	34608108	35386173	4.65678e+07
Q91YX5	Acyl-CoA:lysophosphatidylglycerol acyltransferase 1 OS=Mus musculus OX=10090 GN=Lpgat1 PE=1 SV=1	3	2.40126e+07	10608887	4.19222e+06	11115484	10450325	1.30437e+07	1.64085e+07	1.31698e+07	1.48456e+07
Q91Z53	Glyoxylate reductase/hydroxypyruvate reductase OS=Mus musculus OX=10090 GN=Grhpr PE=1 SV=1	5	8.47334e+07	6.45839e+07	4.94664e+07	69916157	63447874	55923366	63705597	6.05831e+07	6.53051e+07
Q91Z61	GTP-binding protein Di-Ras1 OS=Mus musculus OX=10090 GN=Diras1 PE=1 SV=1	4	74944133	6.14237e+07	28473804	56096958	58335048	61235522	64720783	55514000	59330950
Q91Z67	SLIT-ROBO Rho GTPase-activating protein 2 OS=Mus musculus OX=10090 GN=Srgap2 PE=1 SV=2	14	2.73687e+08	2.56321e+08	200488485	1.01346e+08	9.59625e+07	8.37246e+07	1.52304e+08	1.40078e+08	1.38839e+08
Q91ZA3	Propionyl-CoA carboxylase alpha chain, mitochondrial OS=Mus musculus OX=10090 GN=Pcca PE=1 SV=2	154	497000000000	669000000000	493000000000	1060000000000	1130000000000	794000000000	780000000000	777000000000	782000000000
Q91ZH7	Phospholipase ABHD3 OS=Mus musculus OX=10090 GN=Abhd3 PE=1 SV=1	2	13764574	15545850	21887741	7542534	25390755	12387888	17088845	11699083	1.58898e+07
Q91ZJ5	UTP--glucose-1-phosphate uridylyltransferase OS=Mus musculus OX=10090 GN=Ugp2 PE=1 SV=3	10	174017597	1.65805e+08	104105408	143542026	1.96339e+08	1.52022e+08	182105234	1.65353e+08	168468104
Q91ZP9	N-terminal EF-hand calcium-binding protein 2 OS=Mus musculus OX=10090 GN=Necab2 PE=1 SV=1	1	9431004	6676091	6440197	3.68347e+06	5758250	3267276	5630581	8.15623e+06	7.31458e+06
Q91ZR1	Ras-related protein Rab-4B OS=Mus musculus OX=10090 GN=Rab4b PE=1 SV=2	4	69611007	57979116	19923146	54620797	50985701	47152991	48223380	49119067	54149829
Q91ZU6	Dystonin OS=Mus musculus OX=10090 GN=Dst PE=1 SV=2	1				1.48075e+07		3.10698e+06		3.06214e+06
Q91ZX7	Prolow-density lipoprotein receptor-related protein 1 OS=Mus musculus OX=10090 GN=Lrp1 PE=1 SV=1	40	1246930917	6.17423e+08	4.74371e+08	1213844910	7.33725e+08	6.29741e+08	7.34425e+08	709870158	7.12976e+08
Q91ZZ3	Beta-synuclein OS=Mus musculus OX=10090 GN=Sncb PE=1 SV=1	17	6281938866	4775125974	3001258418	5.06016e+08	3.35594e+08	348073028	2164936655	2241444424	2338803414
Q920B0	FERM domain-containing protein 4B OS=Mus musculus OX=10090 GN=Frmd4b PE=1 SV=2	2	15529585	1.30437e+07	2.28356e+06	9.82858e+06	1.27732e+07	7927360	4.91726e+06	1.0346e+07	10613219
Q920E5	Farnesyl pyrophosphate synthase OS=Mus musculus OX=10090 GN=Fdps PE=1 SV=1	9	1.26986e+08	1.11172e+08	9.9312e+07	92133052	8.87502e+07	7.50345e+07	107196673	1.08146e+08	1.02856e+08
Q920I9	WD repeat-containing protein 7 OS=Mus musculus OX=10090 GN=Wdr7 PE=1 SV=3	34	1138680079	9.34168e+08	8.00598e+08	9.96042e+08	1041494276	8.78569e+08	9.21012e+08	939391343	9.70921e+08
Q920N2	Biotin--protein ligase OS=Mus musculus OX=10090 GN=Hlcs PE=1 SV=1	14	4.16611e+08	4.10502e+08	3.03103e+08	5.83133e+08	632569498	439302243	4.58873e+08	433323740	467785352
Q920P3	BMP/retinoic acid-inducible neural-specific protein 1 OS=Mus musculus OX=10090 GN=Brinp1 PE=1 SV=1	5	3.65662e+07	25816091	2.55657e+07	11079253	24122125	2.46602e+07	15113370	3.00141e+07	2.83699e+07
Q920P5	Adenylate kinase isoenzyme 5 OS=Mus musculus OX=10090 GN=Ak5 PE=1 SV=2	3	22852737	11713499	3.56392e+06	4.37328e+06	1.24725e+07	9873240	1.66205e+07	9055548	1.31786e+07
Q920Q4	Vacuolar protein sorting-associated protein 16 homolog OS=Mus musculus OX=10090 GN=Vps16 PE=1 SV=3	9	85220968	70190871	1.14898e+08	88415016	92147836	9.61782e+07	8.23524e+07	91763031	1.07003e+08
Q920R0	Alsin OS=Mus musculus OX=10090 GN=Als2 PE=1 SV=3	1	7752786	8.21588e+06	5.34158e+06	8900239	8086997	10334664	5482551	5.85992e+06	7336121
Q921C1	Gap junction gamma-3 protein OS=Mus musculus OX=10090 GN=Gjc3 PE=1 SV=2	2	20371887	1.18744e+07	29059960	12294548	1.08507e+07	18329459	32692324	1.16813e+07	1.34152e+07
Q921C5	Protein bicaudal D homolog 2 OS=Mus musculus OX=10090 GN=Bicd2 PE=1 SV=1	1	6.44154e+06	5.92297e+06	2.43668e+06				2.65234e+06	2.31539e+06	2.65299e+06
Q921F2	TAR DNA-binding protein 43 OS=Mus musculus OX=10090 GN=Tardbp PE=1 SV=1	14	753633918	7.17585e+08	5.67179e+08	6.21852e+08	5.35041e+08	5.48485e+08	5.91348e+08	5.91971e+08	6.10182e+08
Q921F4	Heterogeneous nuclear ribonucleoprotein L-like OS=Mus musculus OX=10090 GN=Hnrnpll PE=1 SV=3	11	1.91678e+08	1.69618e+08	135684723	167138236	180331080	1.62847e+08	1.69725e+08	1.69979e+08	1.40103e+08
Q921I1	Serotransferrin OS=Mus musculus OX=10090 GN=Tf PE=1 SV=1	20	1018458802	8.46017e+08	708572526	6.6908e+08	8.12273e+08	557447365	7.49739e+08	7.27973e+08	7.38016e+08
Q921J2	GTP-binding protein Rheb OS=Mus musculus OX=10090 GN=Rheb PE=1 SV=1	4	48310990	48547012	4.12326e+07	3.57937e+07	60611343	3.05491e+07	33738583	4.0162e+07	33136117
Q921M3	Splicing factor 3B subunit 3 OS=Mus musculus OX=10090 GN=Sf3b3 PE=1 SV=1	20	4.36106e+08	479917241	3.89487e+08	5.40454e+08	5.76127e+08	5.11081e+08	504875908	421710262	491508721
Q921M7	Protein FAM49B OS=Mus musculus OX=10090 GN=Fam49b PE=1 SV=1	15	6.99563e+08	601976379	5.26206e+08	5.15483e+08	5.4273e+08	4.43752e+08	502916030	549125316	525087773
Q921W4	Quinone oxidoreductase-like protein 1 OS=Mus musculus OX=10090 GN=Cryzl1 PE=1 SV=1	2	29291660	10609510	1.70121e+07	20438201	2.26657e+07	11301545	2.75643e+07	1.53352e+07	26207576
Q922B2	Aspartate--tRNA ligase, cytoplasmic OS=Mus musculus OX=10090 GN=Dars PE=1 SV=2	19	8.29965e+08	6.94767e+08	539354873	6.6891e+08	7.04801e+08	5.69031e+08	660614633	6.03879e+08	6.37829e+08
Q922D4	Serine/threonine-protein phosphatase 6 regulatory subunit 3 OS=Mus musculus OX=10090 GN=Ppp6r3 PE=1 SV=1	1	29545404	31800244	3.82263e+06	5313550	6.18326e+06	5.69575e+06		5075017	5.83595e+06
Q922D8	C-1-tetrahydrofolate synthase, cytoplasmic OS=Mus musculus OX=10090 GN=Mthfd1 PE=1 SV=4	13	1580132439	1186100968	718100262	1623132369	1401992707	1291262997	1237290722	1298978315	1334271628
Q922E4	Ethanolamine-phosphate cytidylyltransferase OS=Mus musculus OX=10090 GN=Pcyt2 PE=1 SV=1	7	2.15132e+08	1.73094e+08	9.20573e+07	6.59059e+07	6.28666e+07	6.36223e+07	94075650	1.04722e+08	1.15366e+08
Q922F4	Tubulin beta-6 chain OS=Mus musculus OX=10090 GN=Tubb6 PE=1 SV=1	2	35640080	42754888	181832634	72544328	60872876	99005528	81430312	60138468	67982736
Q922H2	[Pyruvate dehydrogenase (acetyl-transferring)] kinase isozyme 3, mitochondrial OS=Mus musculus OX=10090 GN=Pdk3 PE=1 SV=1	9	291113178	2.40865e+08	1.83089e+08	1.17186e+07	6.02181e+06	11030962	104783711	1.13337e+08	1.21361e+08
Q922J6	Tetraspanin-2 OS=Mus musculus OX=10090 GN=Tspan2 PE=1 SV=1	2	7.92331e+07	75864657	5.2792e+07	7.54685e+07	89275656	66289398	6.83024e+07	71999641	5.60029e+07
Q922P8	Transmembrane protein 132A OS=Mus musculus OX=10090 GN=Tmem132a PE=1 SV=2	4	2.70949e+07	3.03677e+07	26592845	2.58287e+07	3.81483e+07	2.16828e+07	24964431	1.22428e+07	30385119
Q922P9	Putative oxidoreductase GLYR1 OS=Mus musculus OX=10090 GN=Glyr1 PE=1 SV=1	1	9152326	4.70249e+06	2.93598e+06			4198798	4.01764e+06
Q922Q4	Pyrroline-5-carboxylate reductase 2 OS=Mus musculus OX=10090 GN=Pycr2 PE=1 SV=1	7	131904551	152727446	1.15012e+08	100796390	1.02559e+08	8.23042e+07	126068540	106801305	106272529
Q922Q8	Leucine-rich repeat-containing protein 59 OS=Mus musculus OX=10090 GN=Lrrc59 PE=1 SV=1	3	34847389	2.752e+07	25600551	9.85611e+06	1.40712e+07	3410338	1.68601e+07	2.22996e+07	2.17139e+07
Q922R8	Protein disulfide-isomerase A6 OS=Mus musculus OX=10090 GN=Pdia6 PE=1 SV=3	4	51836003	5.83868e+07	4.14003e+07	5.74832e+07	2.84057e+07	3.30822e+07	4.39857e+07	4.25269e+07	5.16872e+07
Q922S4	cGMP-dependent 3',5'-cyclic phosphodiesterase OS=Mus musculus OX=10090 GN=Pde2a PE=1 SV=4	19	3.32641e+08	2.83283e+08	1.79148e+08	2.67137e+08	510296433	2.7492e+08	3.99732e+08	3.24702e+08	263906517
Q922Y1	UBX domain-containing protein 1 OS=Mus musculus OX=10090 GN=Ubxn1 PE=1 SV=1	2	2.08646e+07	26966729	1.58845e+07	1.8653e+07	24302713	5.88795e+06	24391373	20787393	1.80486e+07
Q923D2	Flavin reductase (NADPH) OS=Mus musculus OX=10090 GN=Blvrb PE=1 SV=3	4	4.69603e+07	54442081	4.49268e+07	33629707	40660911	30992207	43127926	4.24837e+07	5.06058e+07
Q923S9	Ras-related protein Rab-30 OS=Mus musculus OX=10090 GN=Rab30 PE=1 SV=1	1	5840080		4.8476e+06	4.29215e+06	4.56242e+06	5.28793e+06	4960520	3.63382e+06	6.40631e+06
Q923T9	Calcium/calmodulin-dependent protein kinase type II subunit gamma OS=Mus musculus OX=10090 GN=Camk2g PE=1 SV=1	4	2.21784e+08	212201876	1.32562e+08	144796801	1.84825e+08	163511667	1.8257e+08	1.6855e+08	1.87114e+08
Q923Z0	G-protein coupled receptor family C group 5 member B OS=Mus musculus OX=10090 GN=Gprc5b PE=1 SV=1	5	5.86797e+07	49742248	46238839	67191101	62368236	60106283	4.45694e+07	6.73028e+07	58324121
Q924M7	Mannose-6-phosphate isomerase OS=Mus musculus OX=10090 GN=Mpi PE=1 SV=1	4	67592457	5.0892e+07	47131802	58315001	59710545	53091467	45597904	52818933	51796982
Q924T2	28S ribosomal protein S2, mitochondrial OS=Mus musculus OX=10090 GN=Mrps2 PE=1 SV=1	3	1.55356e+07	1.28161e+07	1.34508e+07	1.42282e+07	1.48853e+07	3.24724e+06	1.34341e+07	1.74468e+07	1.4915e+07
Q924Z4	Ceramide synthase 2 OS=Mus musculus OX=10090 GN=Cers2 PE=1 SV=1	1	71084632	54757784	23307672	55828968	64480160	51158956	50377364	50108676	46111604
Q925E7	Serine/threonine-protein phosphatase 2A 55 kDa regulatory subunit B delta isoform OS=Mus musculus OX=10090 GN=Ppp2r2d PE=1 SV=1	1	7969240	13939920	3.9666e+06	18098054	9388785	3.9445e+06	8524456	9.7987e+06	2.07741e+06
Q925T6	Glutamate receptor-interacting protein 1 OS=Mus musculus OX=10090 GN=Grip1 PE=1 SV=1	2	1.59753e+07	4890396	9.35954e+06	3.92691e+06		3258219	5654992	5207113	4675717
Q93092	Transaldolase OS=Mus musculus OX=10090 GN=Taldo1 PE=1 SV=2	16	5.54221e+08	5.57656e+08	4.56418e+08	4.11633e+08	424188047	3.74683e+08	4.2798e+08	450032830	450463408
Q99020	Heterogeneous nuclear ribonucleoprotein A/B OS=Mus musculus OX=10090 GN=Hnrnpab PE=1 SV=1	7	1.148e+08	108743299	4.08554e+07	8.26929e+07	83612980	8.77904e+07	93502673	8.22765e+07	8.48649e+07
Q99104	Unconventional myosin-Va OS=Mus musculus OX=10090 GN=Myo5a PE=1 SV=2	54	7.14861e+08	8.62707e+08	648426124	7.91951e+08	1009867545	8.93744e+08	770413325	7.61874e+08	7.72693e+08
Q99J08	SEC14-like protein 2 OS=Mus musculus OX=10090 GN=Sec14l2 PE=1 SV=1	8	1.1126e+08	1.14146e+08	99479113	119056703	130696050	123951234	1.16709e+08	1.25958e+08	115805136
Q99J09	Methylosome protein 50 OS=Mus musculus OX=10090 GN=Wdr77 PE=1 SV=1	1	21306784	14122802	17783760	10993776	18379592	19123236	14692034	18871030	16761283
Q99J45	Nuclear receptor-binding protein OS=Mus musculus OX=10090 GN=Nrbp1 PE=1 SV=1	2	13821464	15649903	12185985	1.4078e+07	17960828	1.12991e+07	1.68024e+07	1.53418e+07	1.33506e+07
Q99J77	Sialic acid synthase OS=Mus musculus OX=10090 GN=Nans PE=1 SV=1	4	64178230	45836648	48132630	3.45329e+07	2.5261e+07	1.58429e+07	3.0412e+07	36355582	4.57068e+07
Q99J85	Neuronal pentraxin receptor OS=Mus musculus OX=10090 GN=Nptxr PE=1 SV=1	4	3.97242e+07	31300518	1.01364e+07	2.42391e+07	2.85055e+07	3.10373e+07	2.56737e+07	2.27485e+07	24077852
Q99J99	3-mercaptopyruvate sulfurtransferase OS=Mus musculus OX=10090 GN=Mpst PE=1 SV=4	13	6.21707e+08	433498022	4.00503e+08	3.49496e+08	3.80519e+08	2.97262e+08	3.52701e+08	3.75951e+08	3.72633e+08
Q99JF5	Diphosphomevalonate decarboxylase OS=Mus musculus OX=10090 GN=Mvd PE=1 SV=2	1	3.36724e+06	2.79903e+06		3.26313e+06	3.9563e+06	1.82566e+06	2.77494e+06		2089956
Q99JH7	Calsyntenin-3 OS=Mus musculus OX=10090 GN=Clstn3 PE=1 SV=1	1			3415695						8623184
Q99JI4	26S proteasome non-ATPase regulatory subunit 6 OS=Mus musculus OX=10090 GN=Psmd6 PE=1 SV=1	8	3.52268e+08	2.82284e+08	2.42279e+08	3.31865e+08	284637261	259226496	2.82339e+08	3.03451e+08	2.95821e+08
Q99JI6	Ras-related protein Rap-1b OS=Mus musculus OX=10090 GN=Rap1b PE=1 SV=2	1	40674218	2.46386e+07	9384003	29897506	26731417	21236425	26616919	2.49229e+07	31927011
Q99JN2	Kelch-like protein 22 OS=Mus musculus OX=10090 GN=Klhl22 PE=1 SV=1	2	9.80674e+07	154794928	1.32855e+08	1.76776e+08	183487336	1.63237e+08	1.47209e+08	145853800	112317248
Q99JP7	Glutathione hydrolase 7 OS=Mus musculus OX=10090 GN=Ggt7 PE=1 SV=2	3	4.66573e+07	3.70593e+07	3.08548e+07	3.4511e+07	3.17695e+07	2.66308e+07	29188518	3.45882e+07	3.49425e+07
Q99JX3	Golgi reassembly-stacking protein 2 OS=Mus musculus OX=10090 GN=Gorasp2 PE=1 SV=3	2	1.87281e+07	1.22302e+07	9702252	4.66741e+06		3.65982e+06	7732880	8988580
Q99JX4	Eukaryotic translation initiation factor 3 subunit M OS=Mus musculus OX=10090 GN=Eif3m PE=1 SV=1	2	32393579	26162345	1.7605e+07	30798291	30483734	2.34636e+07	24211358	2.66273e+07	27036603
Q99JY9	Actin-related protein 3 OS=Mus musculus OX=10090 GN=Actr3 PE=1 SV=3	12	7.85108e+08	6.75325e+08	4.92482e+08	6.49715e+08	723731036	522993198	6.24816e+08	6.18664e+08	629109770
Q99K10	Neuroligin-1 OS=Mus musculus OX=10090 GN=Nlgn1 PE=1 SV=2	1	3.71506e+06		4.29525e+06	2.69978e+06	3.71249e+06	1.32987e+06	1533987	3.41065e+06	4240158
Q99K28	ADP-ribosylation factor GTPase-activating protein 2 OS=Mus musculus OX=10090 GN=Arfgap2 PE=1 SV=1	6	80332069	7.33035e+07	49781654	6.02469e+07	60174441	53142985	6.54281e+07	6.5004e+07	51798339
Q99K30	Epidermal growth factor receptor kinase substrate 8-like protein 2 OS=Mus musculus OX=10090 GN=Eps8l2 PE=1 SV=1	1	6.19615e+06	4.78773e+06	4.20611e+06		4658090
Q99K48	Non-POU domain-containing octamer-binding protein OS=Mus musculus OX=10090 GN=Nono PE=1 SV=3	21	6.17216e+08	5.07448e+08	4.3876e+08	3.89778e+08	479767229	423210063	480601691	4.45232e+08	4.91458e+08
Q99K51	Plastin-3 OS=Mus musculus OX=10090 GN=Pls3 PE=1 SV=3	4	78978925	5.7252e+07	6.08404e+07	70988394	3.39046e+07	3.88595e+07	71202811	5.20774e+07	5.16573e+07
Q99K70	Ras-related GTP-binding protein C OS=Mus musculus OX=10090 GN=Rragc PE=1 SV=1	4	42444882	32455598	12586950	3.81128e+07	33170784	3.04557e+07	20714227	26735241	3.31985e+07
Q99K85	Phosphoserine aminotransferase OS=Mus musculus OX=10090 GN=Psat1 PE=1 SV=1	16	6.10383e+08	472500224	396767295	4.23397e+08	415616493	379453601	4.24954e+08	4.4312e+08	4.60962e+08
Q99KB8	Hydroxyacylglutathione hydrolase, mitochondrial OS=Mus musculus OX=10090 GN=Hagh PE=1 SV=2	5	1.17283e+08	1.20773e+08	9.82352e+07	1.23735e+08	139562894	8.27334e+07	1.35002e+08	1.07565e+08	1.21492e+08
Q99KC8	von Willebrand factor A domain-containing protein 5A OS=Mus musculus OX=10090 GN=Vwa5a PE=1 SV=2	8	119869942	96961465	4.42058e+07	5.8097e+07	57940764	63421919	50984681	58860944	58236330
Q99KF1	Transmembrane emp24 domain-containing protein 9 OS=Mus musculus OX=10090 GN=Tmed9 PE=1 SV=2	3	3.23839e+07	2.76545e+07	2.89503e+07	29671663	26557381	2.89357e+07	29603589	3.17758e+07	2.81708e+07
Q99KJ8	Dynactin subunit 2 OS=Mus musculus OX=10090 GN=Dctn2 PE=1 SV=3	8	172516786	118211033	88944425	3.00513e+06	9.34899e+06	6.51913e+06	6.97267e+07	6.55716e+07	6.24553e+07
Q99KK2	N-acylneuraminate cytidylyltransferase OS=Mus musculus OX=10090 GN=Cmas PE=1 SV=2	10	2.95557e+08	310675413	2.27377e+08	3.10077e+08	3.34611e+08	2.50679e+08	2.84408e+08	2.68269e+08	2.96625e+08
Q99KK7	Dipeptidyl peptidase 3 OS=Mus musculus OX=10090 GN=Dpp3 PE=1 SV=2	15	2.32981e+08	1.78272e+08	1.49131e+08	95733706	1.05486e+08	9.24873e+07	116370817	136020034	1.28196e+08
Q99KN9	Clathrin interactor 1 OS=Mus musculus OX=10090 GN=Clint1 PE=1 SV=2	7	2.22103e+08	1.5789e+08	105661207	56213527	46393755	32537708	1.09529e+08	87061852	8.89143e+07
Q99KP6	Pre-mRNA-processing factor 19 OS=Mus musculus OX=10090 GN=Prpf19 PE=1 SV=1	10	2.55031e+08	274104721	1.9608e+08	244570084	2.36911e+08	2.42408e+08	244711647	2.14779e+08	2.81918e+08
Q99KQ4	Nicotinamide phosphoribosyltransferase OS=Mus musculus OX=10090 GN=Nampt PE=1 SV=1	8	248672702	291295663	234350163	3.02728e+08	3.63304e+08	2.81865e+08	2.67009e+08	2.15638e+08	2.72968e+08
Q99KU0	Vacuole membrane protein 1 OS=Mus musculus OX=10090 GN=Vmp1 PE=1 SV=2	2	2.39086e+07	24164924	20019054	2.73858e+07	26267773	23212252	27733002	20635360	24263921
Q99KY4	Cyclin-G-associated kinase OS=Mus musculus OX=10090 GN=Gak PE=1 SV=2	5	5.61029e+07	55720690	42210332	3.88156e+07	3.84135e+07	4.61194e+07	4.89189e+07	42750951	45397889
Q99L04	Dehydrogenase/reductase SDR family member 1 OS=Mus musculus OX=10090 GN=Dhrs1 PE=1 SV=1	7	1.76183e+08	130479322	1.15569e+08	1.15518e+08	123903168	8.62189e+07	80076176	98510072	8.89061e+07
Q99L43	Phosphatidate cytidylyltransferase 2 OS=Mus musculus OX=10090 GN=Cds2 PE=1 SV=1	5	171471893	161771104	1.61209e+08	1.90684e+08	2.02011e+08	149975387	1.63678e+08	147563750	1.67694e+08
Q99L47	Hsc70-interacting protein OS=Mus musculus OX=10090 GN=St13 PE=1 SV=1	5	8.84209e+07	9.4628e+07	2.18088e+07	51520315	81719291	4.45229e+07	64972576	4.82118e+07	5.16449e+07
Q99LB2	Dehydrogenase/reductase SDR family member 4 OS=Mus musculus OX=10090 GN=Dhrs4 PE=1 SV=3	4	48175923	2.99047e+07	33506852	27530468	26883811	23394415	32096319	31843111	27078431
Q99LB6	Methionine adenosyltransferase 2 subunit beta OS=Mus musculus OX=10090 GN=Mat2b PE=1 SV=1	5	80136937	7.71212e+07	4.21314e+07	6.67627e+07	68910911	7.26876e+07	7.67754e+07	7.16156e+07	74610171
Q99LC2	Cleavage stimulation factor subunit 1 OS=Mus musculus OX=10090 GN=Cstf1 PE=1 SV=1	2	1.02336e+07	2.46934e+06	3.39183e+06	3468831	9.06079e+06	3.65709e+06	5171873	4.58393e+06	8.42375e+06
Q99LD4	COP9 signalosome complex subunit 1 OS=Mus musculus OX=10090 GN=Gps1 PE=1 SV=1	6	1.22485e+08	8.60613e+07	9.32544e+07	98545511	8.88977e+07	9.17279e+07	8.3737e+07	9.84035e+07	8.464e+07
Q99LD8	N(G),N(G)-dimethylarginine dimethylaminohydrolase 2 OS=Mus musculus OX=10090 GN=Ddah2 PE=1 SV=1	4	78182191	76308753	61306267	67868441	77628579	57137529	73088681	66039428	70724088
Q99LD9	Translation initiation factor eIF-2B subunit beta OS=Mus musculus OX=10090 GN=Eif2b2 PE=1 SV=1	1	4.49718e+06	3.40158e+06	2548915	2.08475e+06	3.61988e+06	2.96609e+06	2.81369e+06	4417054	2.82836e+06
Q99LF4	tRNA-splicing ligase RtcB homolog OS=Mus musculus OX=10090 GN=Rtcb PE=1 SV=1	14	330764021	2.92698e+08	2.10072e+08	3.34347e+08	2.4836e+08	2.42905e+08	264641154	2.82333e+08	2.68506e+08
Q99LG4	Tetratricopeptide repeat protein 5 OS=Mus musculus OX=10090 GN=Ttc5 PE=1 SV=2	2	11944707	1.59569e+07	1.32523e+07	1.06448e+07		7.85144e+06	1.12684e+07	1.22366e+07	13330866
Q99LI8	Hepatocyte growth factor-regulated tyrosine kinase substrate OS=Mus musculus OX=10090 GN=Hgs PE=1 SV=2	4	53781489	5.49127e+07	43796937	3.9821e+07	23375504	2.91269e+07	3.65641e+07	36859706	41057926
Q99LR1	Monoacylglycerol lipase ABHD12 OS=Mus musculus OX=10090 GN=Abhd12 PE=1 SV=2	12	285858692	2.11349e+08	1.66271e+08	2.10731e+08	2.02312e+08	1.80874e+08	1.84062e+08	1.89025e+08	2.05584e+08
Q99M71	Mammalian ependymin-related protein 1 OS=Mus musculus OX=10090 GN=Epdr1 PE=1 SV=1	4	8.13127e+07	192096786	1.5489e+08	221362768	306714090	4.98724e+08	206549527	342292701	3.45763e+08
Q99M87	DnaJ homolog subfamily A member 3, mitochondrial OS=Mus musculus OX=10090 GN=Dnaja3 PE=1 SV=1	5	7.01255e+07	66628789	34052664	3.88137e+07	44990250	1.94952e+07	4.25417e+07	4.15495e+07	42717612
Q99ME2	WD repeat-containing protein 6 OS=Mus musculus OX=10090 GN=Wdr6 PE=1 SV=1	1	6061170	5800852		7.21439e+06	8553524	3.42927e+06			5555638
Q99MK8	Beta-adrenergic receptor kinase 1 OS=Mus musculus OX=10090 GN=Grk2 PE=1 SV=2	15	4.22936e+08	372770546	2.82473e+08	88161263	99337034	9.111e+07	224196528	2.11481e+08	2.35793e+08
Q99MN1	Lysine--tRNA ligase OS=Mus musculus OX=10090 GN=Kars PE=1 SV=1	4	62236602	4.91185e+07	3.40015e+07	41093410	32271183	3.46594e+07	36877084	29913444	36467799
Q99MN9	Propionyl-CoA carboxylase beta chain, mitochondrial OS=Mus musculus OX=10090 GN=Pccb PE=1 SV=2	19	6.41695e+08	4.57165e+08	2478668830	6.82471e+08	7411127130	498635261	5.36185e+08	5.44314e+08	21138108723
Q99MP8	BRCA1-associated protein OS=Mus musculus OX=10090 GN=Brap PE=1 SV=1	1	9878674	9286415		6.80377e+06	11760169	6132051			7.58187e+06
Q99MR0	Actin-like protein 6B OS=Mus musculus OX=10090 GN=Actl6b PE=1 SV=1	3	5.06712e+07	2.62887e+07	23238606	21397215	2.33608e+07	26777915	17998200	1.91409e+07	1.91345e+07
Q99N28	Cell adhesion molecule 3 OS=Mus musculus OX=10090 GN=Cadm3 PE=1 SV=1	9	6.29321e+08	5.85162e+08	3.91952e+08	6.17086e+08	6.97125e+08	5.08962e+08	5.83381e+08	5.72894e+08	5.6824e+08
Q99NB1	Acetyl-coenzyme A synthetase 2-like, mitochondrial OS=Mus musculus OX=10090 GN=Acss1 PE=1 SV=1	6	77401078	74038119	71695866	6.96257e+07	70210954	6.11519e+07	7.04057e+07	66364778	71343369
Q99NB9	Splicing factor 3B subunit 1 OS=Mus musculus OX=10090 GN=Sf3b1 PE=1 SV=1	3	36099159	2.72178e+07	18784882	2.49103e+07	2.68074e+07	22446169	28968594	2.56296e+07	30686369
Q99NE5	Regulating synaptic membrane exocytosis protein 1 OS=Mus musculus OX=10090 GN=Rims1 PE=1 SV=2	5	4.74998e+07	36429791	2.93083e+07	2.64073e+07	3.03555e+07	2.58813e+07	3.08273e+07	30937382	39091157
Q99NF2	NMDA receptor synaptonuclear signaling and neuronal migration factor OS=Mus musculus OX=10090 GN=Nsmf PE=1 SV=1	1	8827592	6.19273e+06	4761184	3.63036e+06				3.89314e+06	2.07043e+06
Q99P47	Contactin-associated protein-like 4 OS=Mus musculus OX=10090 GN=Cntnap4 PE=1 SV=2	1	13577851	14759838	19405632	16349499	7.45226e+06	15503791	15224339	15106102	14750248
Q99P72	Reticulon-4 OS=Mus musculus OX=10090 GN=Rtn4 PE=1 SV=2	37	4491405240	3249673398	1565819255	8.81264e+08	8.57493e+08	5.97349e+08	1732039132	1840657899	1728178873
Q99P88	Nuclear pore complex protein Nup155 OS=Mus musculus OX=10090 GN=Nup155 PE=1 SV=1	1	4.87465e+06	2.72323e+06	5062004		5236951	2.53022e+06	3.90253e+06	3462219	6.16047e+06
Q99PG2	Opioid growth factor receptor OS=Mus musculus OX=10090 GN=Ogfr PE=1 SV=1	1			4627429				5.92542e+06	3.37281e+06	4.82202e+06
Q99PJ0	Neurotrimin OS=Mus musculus OX=10090 GN=Ntm PE=1 SV=2	6	271147364	226737728	142362751	187283529	195985345	147730589	185730924	189915326	182899099
Q99PL5	Ribosome-binding protein 1 OS=Mus musculus OX=10090 GN=Rrbp1 PE=1 SV=2	3	2.90238e+07	2.6409e+07	1.96968e+07	14268435	2.15929e+07	20791526	1.62132e+07	22717743	1.7931e+07
Q99PL6	UBX domain-containing protein 6 OS=Mus musculus OX=10090 GN=Ubxn6 PE=1 SV=1	7	1.1002e+08	8.04237e+07	63019615	40182347	49707684	3.65387e+07	4.53277e+07	4.24422e+07	4.57566e+07
Q99PT1	Rho GDP-dissociation inhibitor 1 OS=Mus musculus OX=10090 GN=Arhgdia PE=1 SV=3	10	9.18141e+08	1145708561	6.49686e+08	1275145865	1395837452	925966443	1019891143	1078094284	1025722639
Q99PU5	Long-chain-fatty-acid--CoA ligase ACSBG1 OS=Mus musculus OX=10090 GN=Acsbg1 PE=1 SV=1	28	1480794645	1227698110	1026999242	1324416350	1320793284	1124294362	1160624222	1166970032	1182063111
Q99PV0	Pre-mRNA-processing-splicing factor 8 OS=Mus musculus OX=10090 GN=Prpf8 PE=1 SV=2	4	21788548	1.81994e+07	1.53953e+07	17902212	1.73087e+07	6.47186e+06	1.7647e+07	1.70388e+07	27214163
Q9CPR4	60S ribosomal protein L17 OS=Mus musculus OX=10090 GN=Rpl17 PE=1 SV=3	3	34365038	30103345	1.91966e+07	29124253	35727823	1.84946e+07	27749883	2.6826e+07	30371685
Q9CPT4	Myeloid-derived growth factor OS=Mus musculus OX=10090 GN=Mydgf PE=1 SV=1	2	43044961	4.26484e+07	1.7678e+07	4.26421e+07	5.04122e+07	3.41923e+07	3.50065e+07	3.37694e+07	3.83697e+07
Q9CPU0	Lactoylglutathione lyase OS=Mus musculus OX=10090 GN=Glo1 PE=1 SV=3	11	482250331	3.52376e+08	253605033	130650840	104471618	1.32475e+08	2.021e+08	2.18317e+08	2.15046e+08
Q9CPW0	Contactin-associated protein-like 2 OS=Mus musculus OX=10090 GN=Cntnap2 PE=1 SV=2	17	359165217	2.98365e+08	2.74641e+08	361919628	3.5772e+08	3.01002e+08	319568378	322250620	3.14317e+08
Q9CPW4	Actin-related protein 2/3 complex subunit 5 OS=Mus musculus OX=10090 GN=Arpc5 PE=1 SV=3	7	631164017	475316386	366436075	121214727	85864687	24948061	296404987	261208916	267266178
Q9CPX6	Ubiquitin-like-conjugating enzyme ATG3 OS=Mus musculus OX=10090 GN=Atg3 PE=1 SV=1	6	8.26707e+07	4.97242e+07	2.48827e+07	5.3674e+07	6.58271e+07	4.69815e+07	4.8877e+07	4.67594e+07	6.20606e+07
Q9CQ26	STAM-binding protein OS=Mus musculus OX=10090 GN=Stambp PE=1 SV=1	2	1.36628e+07	1.48411e+07	1.02324e+07	11644213	1.07127e+07	9.16709e+06	1.07074e+07	1.30579e+07	13399764
Q9CQ60	6-phosphogluconolactonase OS=Mus musculus OX=10090 GN=Pgls PE=1 SV=1	5	93454706	98758534	1.12214e+08	75056934	87796985	68366672	83623595	90396419	88006943
Q9CQ62	2,4-dienoyl-CoA reductase, mitochondrial OS=Mus musculus OX=10090 GN=Decr1 PE=1 SV=1	6	1.91758e+08	216164131	2.29848e+08	225690465	1.18288e+08	4.3569e+08	1.92212e+08	193255969	190785181
Q9CQ65	S-methyl-5'-thioadenosine phosphorylase OS=Mus musculus OX=10090 GN=Mtap PE=1 SV=1	6	133485942	103555842	2.27765e+08	86889780	103072481	82958796	133270261	1.14277e+08	120363079
Q9CQ80	Vacuolar protein-sorting-associated protein 25 OS=Mus musculus OX=10090 GN=Vps25 PE=1 SV=1	8	237281657	1.58345e+08	1.18359e+08	1942724	3.33497e+07		6.9444e+07	6.85802e+07	5.09886e+07
Q9CQ85	Mitochondrial import inner membrane translocase subunit Tim22 OS=Mus musculus OX=10090 GN=Timm22 PE=1 SV=1	2		6.83575e+06	12081655	5199881	6.95845e+06	5.77807e+06	6.31003e+06	5558607	4521515
Q9CQ92	Mitochondrial fission 1 protein OS=Mus musculus OX=10090 GN=Fis1 PE=1 SV=1	2	9.12779e+06	1.16636e+07	8.48944e+06	1.27251e+07	7.35965e+06	6.28621e+06	9669386	9.39713e+06	1.10501e+07
Q9CQA1	Trafficking protein particle complex subunit 5 OS=Mus musculus OX=10090 GN=Trappc5 PE=1 SV=1	2	22694206	21204057	5.25329e+06	9.39424e+06	3.30052e+06	2.48504e+06	6457943	6034074	12379996
Q9CQC6	Basic leucine zipper and W2 domain-containing protein 1 OS=Mus musculus OX=10090 GN=Bzw1 PE=1 SV=1	2	3.61113e+06	3.46699e+06	2.3759e+06			1.52307e+06	4499879	8.14276e+06	8.6815e+06
Q9CQC9	GTP-binding protein SAR1b OS=Mus musculus OX=10090 GN=Sar1b PE=1 SV=1	4	2.32281e+08	193208344	1.42004e+08	184506558	152256176	1.55825e+08	155187782	175798276	130659346
Q9CQD1	Ras-related protein Rab-5A OS=Mus musculus OX=10090 GN=Rab5a PE=1 SV=1	5	179715618	165942546	92147743	154765422	180536064	134103826	181981136	145343962	151468466
Q9CQE1	Protein NipSnap homolog 3B OS=Mus musculus OX=10090 GN=Nipsnap3b PE=1 SV=1	3	41706277	40549035	3.53374e+07	34669344	40139154	3.0944e+07	3.64323e+07	41384572	37885044
Q9CQF3	Cleavage and polyadenylation specificity factor subunit 5 OS=Mus musculus OX=10090 GN=Nudt21 PE=1 SV=1	2	8390588	1.1814e+07	2.82881e+06	3620866	4.21296e+06	6.12448e+06	10189285	8.67336e+06	1.0877e+07
Q9CQF4	Uncharacterized protein C6orf203 homolog OS=Mus musculus OX=10090 PE=1 SV=1	2	101613936	53873714	48565369				20247003	96572354	29998570
Q9CQF9	Prenylcysteine oxidase OS=Mus musculus OX=10090 GN=Pcyox1 PE=1 SV=1	9	82217184	7.02198e+07	58918105	7.91701e+07	9.18183e+07	85030476	5.4494e+07	8.13677e+07	8.81559e+07
Q9CQH7	Transcription factor BTF3 homolog 4 OS=Mus musculus OX=10090 GN=Btf3l4 PE=1 SV=1	2	1.99767e+07	26528446	15191769	4.88195e+06	4086688		8767616	5.84122e+06	11955175
Q9CQI3	Glia maturation factor beta OS=Mus musculus OX=10090 GN=Gmfb PE=1 SV=3	6	254384762	273372164	2.2267e+08	2.64112e+08	343719620	236134666	252208876	268357309	2.72747e+08
Q9CQI6	Coactosin-like protein OS=Mus musculus OX=10090 GN=Cotl1 PE=1 SV=3	9	364828349	312622327	1.76303e+08	2.96891e+08	288959975	250172003	263693387	2.63132e+08	259125436
Q9CQJ6	Density-regulated protein OS=Mus musculus OX=10090 GN=Denr PE=1 SV=1	2	20584756	2.28089e+07	8138369	18211280	1.65335e+07	1.71064e+07	1.88374e+07	1.20586e+07	14436060
Q9CQM5	Thioredoxin domain-containing protein 17 OS=Mus musculus OX=10090 GN=Txndc17 PE=1 SV=1	1	13697129	12132750	10453059	12216250	15032970	11099808	13484076	11184574	13127937
Q9CQM9	Glutaredoxin-3 OS=Mus musculus OX=10090 GN=Glrx3 PE=1 SV=1	5	101919704	8.56652e+07	4.53005e+07	5.93366e+07	62193898	3.36655e+07	59437702	5.69687e+07	67630289
Q9CQQ7	ATP synthase F(0) complex subunit B1, mitochondrial OS=Mus musculus OX=10090 GN=Atp5f1 PE=1 SV=1	11	730192329	6.1461e+08	570531219	5.69353e+08	654683156	5.26406e+08	594820097	5.98473e+08	5.77895e+08
Q9CQR2	40S ribosomal protein S21 OS=Mus musculus OX=10090 GN=Rps21 PE=1 SV=1	2	2.55937e+07	3.30633e+07	28033937	2.83113e+07	41574468	25923787	2.88601e+07	32616540	3.12768e+07
Q9CQR4	Acyl-coenzyme A thioesterase 13 OS=Mus musculus OX=10090 GN=Acot13 PE=1 SV=1	2	47959124	43080368	30704115	39514672	41661418	2.6515e+07	36565205	32972564	3.49187e+07
Q9CQR6	Serine/threonine-protein phosphatase 6 catalytic subunit OS=Mus musculus OX=10090 GN=Ppp6c PE=1 SV=1	6	138435071	1.16627e+08	1.31949e+08	1.16576e+08	1.26324e+08	1.10682e+08	1.16581e+08	1.15844e+08	133585705
Q9CQS8	Protein transport protein Sec61 subunit beta OS=Mus musculus OX=10090 GN=Sec61b PE=1 SV=3	2	46152866	48435930	38255588	43419422	46418650	38855768	44808574	44641502	46945738
Q9CQU3	Protein RER1 OS=Mus musculus OX=10090 GN=Rer1 PE=1 SV=1	1	23558416	19115364	13253938	21176290	27736062	16848104	19164402	19632298	19029138
Q9CQV8	14-3-3 protein beta/alpha OS=Mus musculus OX=10090 GN=Ywhab PE=1 SV=3	15	1055617145	9.60723e+08	8.54781e+08	9.4858e+08	9.87288e+08	7.49472e+08	8.56589e+08	9.14283e+08	8.96595e+08
Q9CQW1	Synaptobrevin homolog YKT6 OS=Mus musculus OX=10090 GN=Ykt6 PE=1 SV=1	3	61653469	45599087	2.68835e+07	2.83843e+07	48200882	43004856	56060728	73818690	47534131
Q9CQW2	ADP-ribosylation factor-like protein 8B OS=Mus musculus OX=10090 GN=Arl8b PE=1 SV=1	9	5.66707e+08	475807383	3.51378e+08	4.55959e+08	6.70076e+08	4.1288e+08	4.59233e+08	463511216	516114243
Q9CQX8	28S ribosomal protein S36, mitochondrial OS=Mus musculus OX=10090 GN=Mrps36 PE=1 SV=1	7	4.81309e+08	451267855	3.49585e+08	22948616	1.97328e+07	1.71936e+07	1.84976e+08	2.05334e+08	199790771
Q9CR00	26S proteasome non-ATPase regulatory subunit 9 OS=Mus musculus OX=10090 GN=Psmd9 PE=1 SV=1	1	12091568	7208061	8048742			4784377			8.07841e+06
Q9CR09	Ubiquitin-fold modifier-conjugating enzyme 1 OS=Mus musculus OX=10090 GN=Ufc1 PE=1 SV=1	2	1.8349e+07	2.06882e+07	18098118	18321268	8413347	1.60549e+07	16838126	9028638	1.72073e+07
Q9CR16	Peptidyl-prolyl cis-trans isomerase D OS=Mus musculus OX=10090 GN=Ppid PE=1 SV=3	8	127109858	87591697	4.75851e+07	7.8516e+07	8.63203e+07	55672471	6.51207e+07	4.04321e+07	6.60451e+07
Q9CR26	Vacuolar protein sorting-associated protein VTA1 homolog OS=Mus musculus OX=10090 GN=Vta1 PE=1 SV=1	4	110008950	107178093	6.51012e+07	97110345	103288381	1.01238e+08	94824956	107151562	79918198
Q9CR27	WASH complex subunit 3 OS=Mus musculus OX=10090 GN=Washc3 PE=1 SV=1	7	581780505	350251006	199363425	8.27938e+06			1.49343e+08	136264034	1.52039e+08
Q9CR39	WD repeat domain phosphoinositide-interacting protein 3 OS=Mus musculus OX=10090 GN=Wdr45b PE=1 SV=2	1	15575104	9276573	10571384	10476706	9673319	8426715	9225292	13346977	8603634
Q9CR56	NF-kappa-B inhibitor-interacting Ras-like protein 2 OS=Mus musculus OX=10090 GN=Nkiras2 PE=1 SV=1	1	3593375	3871897	2.9384e+06	3.08092e+06	2971018			2.49988e+06	4275508
Q9CR57	60S ribosomal protein L14 OS=Mus musculus OX=10090 GN=Rpl14 PE=1 SV=3	1	12390622	12853411	7830110	4.18434e+06	10599328	6739515	10927912	7035822	6.38246e+06
Q9CR60	Vesicle transport protein GOT1B OS=Mus musculus OX=10090 GN=Golt1b PE=1 SV=1	2	6.91254e+06	1.27798e+07	11898137	18272840	1.96614e+07	8216323	3550462	9.60733e+06	1.20622e+07
Q9CR62	Mitochondrial 2-oxoglutarate/malate carrier protein OS=Mus musculus OX=10090 GN=Slc25a11 PE=1 SV=3	11	4.09434e+08	3.23521e+08	2.65239e+08	350947347	319983372	2.57251e+08	3.2062e+08	2.93269e+08	2.97711e+08
Q9CR67	Transmembrane protein 33 OS=Mus musculus OX=10090 GN=Tmem33 PE=1 SV=1	3	102989266	63720478	40749443	80366135	51373478	63346638	64066156	62099531	66782180
Q9CR86	Calcium-regulated heat stable protein 1 OS=Mus musculus OX=10090 GN=Carhsp1 PE=1 SV=1	3	52635782	48714340	1.52945e+07	47875002	46869067	38811415	3.83154e+07	46339972	40072306
Q9CR95	Adaptin ear-binding coat-associated protein 1 OS=Mus musculus OX=10090 GN=Necap1 PE=1 SV=2	4	271297930	226618800	179140015	170669159	185742373	155548171	191171150	198994238	193125878
Q9CRA9	FGFR1 oncogene partner 2 homolog OS=Mus musculus OX=10090 GN=Fgfr1op2 PE=1 SV=1	5	75666246	38780138	4.71433e+07				2.38979e+07	1.08187e+07	12241897
Q9CRB6	Tubulin polymerization-promoting protein family member 3 OS=Mus musculus OX=10090 GN=Tppp3 PE=1 SV=1	7	3.1541e+08	2.83031e+08	1.98402e+08	14323052	37068711	3.96867e+07	1.4898e+08	1.37177e+08	157227580
Q9CRC8	Leucine-rich repeat-containing protein 40 OS=Mus musculus OX=10090 GN=Lrrc40 PE=1 SV=2	1	7237572	5375500	2.90838e+06	3.68406e+06	3.87478e+06	3.43869e+06	3.64917e+06	4433284	3.33582e+06
Q9CRY7	Lysophospholipase D GDPD1 OS=Mus musculus OX=10090 GN=Gdpd1 PE=1 SV=1	4	65913137	71762292	60840963	66764184	71497321	64497994	77446558	76057365	71086580
Q9CS84	Neurexin-1 OS=Mus musculus OX=10090 GN=Nrxn1 PE=1 SV=3	22	3.14227e+08	2.83158e+08	2.14925e+08	328132670	3.62118e+08	3.37229e+08	3.63845e+08	352275054	3.3846e+08
Q9CT10	Ran-binding protein 3 OS=Mus musculus OX=10090 GN=Ranbp3 PE=1 SV=2	3	18121830	2.66843e+07	17760101	2.2075e+07	27287121	2.32398e+07	2.00274e+07	1.55379e+07	18406674
Q9CTY5	Calcium uptake protein 3, mitochondrial OS=Mus musculus OX=10090 GN=Micu3 PE=2 SV=2	4	25701417	1.68664e+07	16353988	2.79102e+07	1.78066e+07	18505565	2.17021e+07	19900469	1.6543e+07
Q9CVB6	Actin-related protein 2/3 complex subunit 2 OS=Mus musculus OX=10090 GN=Arpc2 PE=1 SV=3	15	8.78994e+08	7.36046e+08	4.52619e+08	5.78035e+08	629579490	5.22665e+08	569787257	5.9372e+08	5.64922e+08
Q9CWF2	Tubulin beta-2B chain OS=Mus musculus OX=10090 GN=Tubb2b PE=1 SV=1	4	1966703341	1946285469	2036517834	1881662956	1953361338	1761150259	1844608380	1836546580	1918463247
Q9CWK8	Sorting nexin-2 OS=Mus musculus OX=10090 GN=Snx2 PE=1 SV=2	5	9.28534e+07	42321759	30187202	1.23407e+07	3.54483e+06	9256739	2.0732e+07	19039180	1.67579e+07
Q9CWN7	CCR4-NOT transcription complex subunit 11 OS=Mus musculus OX=10090 GN=Cnot11 PE=1 SV=1	1	14214781		6206538
Q9CWQ0	Diphthine methyl ester synthase OS=Mus musculus OX=10090 GN=Dph5 PE=1 SV=2	1	11473635	10389135	7491589	19381040	21816020	1833176	15471265	9213502	9538624
Q9CWS0	N(G),N(G)-dimethylarginine dimethylaminohydrolase 1 OS=Mus musculus OX=10090 GN=Ddah1 PE=1 SV=3	11	527189881	430151786	251546610	4.43062e+08	4.56579e+08	3.40285e+08	434076806	399667088	4.16011e+08
Q9CWZ7	Gamma-soluble NSF attachment protein OS=Mus musculus OX=10090 GN=Napg PE=1 SV=1	17	1010930244	720657324	6.19249e+08	4.22231e+08	4.7882e+08	3.66718e+08	5.2901e+08	557334480	5.11726e+08
Q9CX00	IST1 homolog OS=Mus musculus OX=10090 GN=Ist1 PE=1 SV=1	10	938963735	5.76878e+08	4.33463e+08	36685828	19338651	2.46212e+06	2.81305e+08	2.94884e+08	3.16534e+08
Q9CX34	Protein SGT1 homolog OS=Mus musculus OX=10090 GN=Sugt1 PE=1 SV=3	7	2.02889e+08	174723023	114999430	139018735	123839825	1.06908e+08	1.54225e+08	1.5283e+08	139483940
Q9CX56	26S proteasome non-ATPase regulatory subunit 8 OS=Mus musculus OX=10090 GN=Psmd8 PE=1 SV=2	9	2.32109e+08	158790483	121502161	1.18986e+08	127920327	8.69428e+07	9.56819e+07	1.29038e+08	119767734
Q9CX86	Heterogeneous nuclear ribonucleoprotein A0 OS=Mus musculus OX=10090 GN=Hnrnpa0 PE=1 SV=1	8	1.20325e+08	126067682	1.27546e+08	102870844	1.43143e+08	98309189	1.05526e+08	124809865	1.258e+08
Q9CXR1	Dehydrogenase/reductase SDR family member 7 OS=Mus musculus OX=10090 GN=Dhrs7 PE=1 SV=2	2	25566821	1.61747e+07	1.08003e+07	17275874	12297690	12264488	15207467	15825719	1.4589e+07
Q9CXS4	Centromere protein V OS=Mus musculus OX=10090 GN=Cenpv PE=1 SV=2	5	89529891	76643116	61463545	77704009	7.61889e+07	51197873	71482647	69582929	7.44695e+07
Q9CXW3	Calcyclin-binding protein OS=Mus musculus OX=10090 GN=Cacybp PE=1 SV=1	14	268189927	2.02224e+08	148135605	2.44934e+08	2.28015e+08	165751906	197241641	1.88429e+08	203963413
Q9CXW4	60S ribosomal protein L11 OS=Mus musculus OX=10090 GN=Rpl11 PE=1 SV=4	3	139651473	1.23672e+08	97192519	79785320	9.29986e+07	84948600	1.03781e+08	9.46553e+07	9.99461e+07
Q9CXX9	CUE domain-containing protein 2 OS=Mus musculus OX=10090 GN=Cuedc2 PE=1 SV=1	1	7770251	6.8395e+06	9858799				4.1666e+06		4335990
Q9CXY6	Interleukin enhancer-binding factor 2 OS=Mus musculus OX=10090 GN=Ilf2 PE=1 SV=1	5	8.15258e+07	67735921	5.96253e+07	58119734	5.07154e+07	38132268	59448545	56547819	64705722
Q9CXY9	GPI-anchor transamidase OS=Mus musculus OX=10090 GN=Pigk PE=1 SV=2	2	1.49015e+07	10128296	9.68453e+06	1.17434e+07	4.42789e+06	2.22196e+06	3.59854e+06	1.12437e+07	5003153
Q9CY27	Very-long-chain enoyl-CoA reductase OS=Mus musculus OX=10090 GN=Tecr PE=1 SV=1	7	133678828	1.01026e+08	83119586	1.17987e+08	123336531	8.30671e+07	1.02893e+08	98655130	1.0889e+08
Q9CY58	Plasminogen activator inhibitor 1 RNA-binding protein OS=Mus musculus OX=10090 GN=Serbp1 PE=1 SV=2	2	37772344	33891087	1.68256e+07	9912876	1.26915e+07	8170765	2.52499e+07	1.76652e+07	2.31322e+07
Q9CY64	Biliverdin reductase A OS=Mus musculus OX=10090 GN=Blvra PE=1 SV=1	4	91082045	37350196	51914690	4.31659e+07	4.31736e+07	45068672	41003081	48744619	48067079
Q9CYI0	Protein Njmu-R1 OS=Mus musculus OX=10090 PE=1 SV=2	1	6.51612e+06	5.84904e+06	2740553	3.32043e+06	5.48426e+06	4.97095e+06	11890567	4.96731e+06	4741397
Q9CYN2	Signal peptidase complex subunit 2 OS=Mus musculus OX=10090 GN=Spcs2 PE=1 SV=1	2	41778286	44634073	5884351	63073556	76798176	50681520	47462845	40120710	55215890
Q9CYR0	Single-stranded DNA-binding protein, mitochondrial OS=Mus musculus OX=10090 GN=Ssbp1 PE=1 SV=1	3	63211993	5.92546e+07	46953086			4468169	3.04602e+07	22530360	30625529
Q9CYR6	Phosphoacetylglucosamine mutase OS=Mus musculus OX=10090 GN=Pgm3 PE=1 SV=1	6	84148564	7.44736e+07	6.86024e+07	7.77366e+07	95124168	72676604	79479707	8.10021e+07	8.49582e+07
Q9CYT6	Adenylyl cyclase-associated protein 2 OS=Mus musculus OX=10090 GN=Cap2 PE=1 SV=1	14	448757439	370940511	2.96658e+08	407023256	297449331	3.66553e+08	4.41061e+08	437108669	4.12346e+08
Q9CYZ2	Tumor protein D54 OS=Mus musculus OX=10090 GN=Tpd52l2 PE=1 SV=1	6	1.4625e+08	1.03808e+08	1.20776e+08	1.21437e+07	9.52797e+06		6.12414e+07	6.59638e+07	5.16354e+07
Q9CZ04	COP9 signalosome complex subunit 7a OS=Mus musculus OX=10090 GN=Cops7a PE=1 SV=2	3	44926252	30426356	1.32053e+07	1.57522e+06	7.9956e+06	7.04916e+06	1.64951e+07	8.48538e+06	1.69599e+07
Q9CZ30	Obg-like ATPase 1 OS=Mus musculus OX=10090 GN=Ola1 PE=1 SV=1	5	152665797	131345097	107554958	105601137	63830470	89562393	105926714	113623986	92472155
Q9CZ42	ATP-dependent (S)-NAD(P)H-hydrate dehydratase OS=Mus musculus OX=10090 GN=Naxd PE=1 SV=1	5	8.92269e+07	6.37845e+07	5.14732e+07	4.64624e+07	5.89801e+07	50393634	6.35701e+07	5.3873e+07	69634332
Q9CZ44	NSFL1 cofactor p47 OS=Mus musculus OX=10090 GN=Nsfl1c PE=1 SV=1	34	9013188842	7094179544	4642089301	2.81878e+08	1.89849e+08	1.01295e+08	3012686050	3160233412	3208742128
Q9CZC8	Secernin-1 OS=Mus musculus OX=10090 GN=Scrn1 PE=1 SV=1	8	352733846	2.87379e+08	2.20706e+08	2.45234e+08	250169338	201984222	2.31679e+08	237049789	252699002
Q9CZN4	Protein shisa-9 OS=Mus musculus OX=10090 GN=Shisa9 PE=1 SV=2	3	48763414	21553848	9044379			3.26289e+06	7.67706e+06	14238113	14895760
Q9CZN7	Serine hydroxymethyltransferase, mitochondrial OS=Mus musculus OX=10090 GN=Shmt2 PE=1 SV=1	10	203137579	219754344	1.92732e+08	2.55348e+07	2.63716e+07	44079563	111640938	112241939	1.1767e+08
Q9CZT8	Ras-related protein Rab-3B OS=Mus musculus OX=10090 GN=Rab3b PE=1 SV=1	4	49003657	30221439	1.86235e+07	2.9715e+07	38703144	30547503	20844304	19554150	39833499
Q9CZV8	F-box/LRR-repeat protein 20 OS=Mus musculus OX=10090 GN=Fbxl20 PE=1 SV=3	1		11879256	5593439			6.6991e+06	6396698	7569456	8553616
Q9CZW4	Long-chain-fatty-acid--CoA ligase 3 OS=Mus musculus OX=10090 GN=Acsl3 PE=1 SV=2	12	1.17671e+08	1.15866e+08	99790820	88752575	116925032	9.51538e+07	1.0353e+08	1.02362e+08	8.87569e+07
Q9CZX0	Elongator complex protein 3 OS=Mus musculus OX=10090 GN=Elp3 PE=1 SV=1	2	8738187	4478950	3.68544e+06	9886982	8.68642e+06	4.19278e+06	5.53608e+06	1.07371e+07	3.84951e+06
Q9CZY3	Ubiquitin-conjugating enzyme E2 variant 1 OS=Mus musculus OX=10090 GN=Ube2v1 PE=1 SV=1	6	5.46246e+08	5.34396e+08	400899319	572903480	628379570	4.67921e+08	515104681	542995810	517736478
Q9D0A3	Arpin OS=Mus musculus OX=10090 GN=Arpin PE=1 SV=1	3	36675455	34762131	13474278	8137115	20072692	1.31478e+07	19590932	24024535	21053380
Q9D0E1	Heterogeneous nuclear ribonucleoprotein M OS=Mus musculus OX=10090 GN=Hnrnpm PE=1 SV=3	19	461349673	306704322	365126701	3.20177e+08	339341216	2.66591e+08	3.30439e+08	3.53806e+08	3.3505e+08
Q9D0E3	LysM and putative peptidoglycan-binding domain-containing protein 1 OS=Mus musculus OX=10090 GN=Lysmd1 PE=1 SV=1	1	7.65145e+06	5408375	2704482					3.32272e+06	3.17502e+06
Q9D0F3	Protein ERGIC-53 OS=Mus musculus OX=10090 GN=Lman1 PE=1 SV=1	3	28023791	2.08137e+07	1.30539e+07	2.03069e+07	1.38848e+07	22179259	1.98164e+07	1.73742e+07	22088797
Q9D0F9	Phosphoglucomutase-1 OS=Mus musculus OX=10090 GN=Pgm1 PE=1 SV=4	11	347122029	2.90099e+08	487442853	4.0986e+08	3.31881e+08	3.53344e+08	3.78965e+08	3.70724e+08	3.82352e+08
Q9D0J8	Parathymosin OS=Mus musculus OX=10090 GN=Ptms PE=1 SV=3	1	3.53408e+06	5.3975e+06		1.12871e+06	1.45917e+06		2.32835e+06	1537720	2.14581e+06
Q9D0L8	mRNA cap guanine-N7 methyltransferase OS=Mus musculus OX=10090 GN=Rnmt PE=1 SV=1	7	115011998	9.52621e+07	6.40476e+07	8.31671e+07	8.37063e+07	76475061	8.35867e+07	85531142	90345998
Q9D0M1	Phosphoribosyl pyrophosphate synthase-associated protein 1 OS=Mus musculus OX=10090 GN=Prpsap1 PE=1 SV=1	1	5.56284e+06	5616102	3.18785e+06		5460755	3.37319e+06	4627545		6108908
Q9D0M5	Dynein light chain 2, cytoplasmic OS=Mus musculus OX=10090 GN=Dynll2 PE=1 SV=1	3	244789072	246944628	108026352	263624696	287962852	166947942	224623978	214074108	208525132
Q9D0R8	Protein LSM12 homolog OS=Mus musculus OX=10090 GN=Lsm12 PE=1 SV=1	3	4.25939e+07	48080976	32945576	36663571	4.07589e+07	3.83366e+07	33129912	3.94084e+07	3.47666e+07
Q9D0S9	Histidine triad nucleotide-binding protein 2, mitochondrial OS=Mus musculus OX=10090 GN=Hint2 PE=1 SV=1	2	23254956	21244042	9621579	13054283	15965806	4.99244e+07	10833423	35882187	14158061
Q9D0T1	NHP2-like protein 1 OS=Mus musculus OX=10090 GN=Snu13 PE=1 SV=4	1	13268524	17699402	9312575	14522858	19132038	9126762	11881072	12828498	12826264
Q9D0W5	Peptidyl-prolyl cis-trans isomerase-like 1 OS=Mus musculus OX=10090 GN=Ppil1 PE=1 SV=1	2	19944973	9604749	1.54774e+07	4517711	1.12427e+07	12760284	1.07437e+07	1.1252e+07	18555925
Q9D164	FXYD domain-containing ion transport regulator 6 OS=Mus musculus OX=10090 GN=Fxyd6 PE=1 SV=2	2	13146745	15543248	20269596		42144796	28311740	37134224	24070582
Q9D1A2	Cytosolic non-specific dipeptidase OS=Mus musculus OX=10090 GN=Cndp2 PE=1 SV=1	13	288944997	2.66377e+08	1.73655e+08	2.08892e+08	285507491	1.6498e+08	2.36543e+08	1.95836e+08	241642802
Q9D1D4	Transmembrane emp24 domain-containing protein 10 OS=Mus musculus OX=10090 GN=Tmed10 PE=1 SV=1	5	85542554	7.73624e+07	6.65894e+07	1.07344e+08	96998875	85814081	7.44634e+07	9.1808e+07	97429861
Q9D1E6	Tubulin-folding cofactor B OS=Mus musculus OX=10090 GN=Tbcb PE=1 SV=2	9	2.02694e+08	1.46307e+08	1.08624e+08	154626991	1.62255e+08	1.23334e+08	127272992	159127305	150829502
Q9D1G1	Ras-related protein Rab-1B OS=Mus musculus OX=10090 GN=Rab1b PE=1 SV=1	6	1.4151e+08	1.39083e+08	159606471	1.64936e+08	173421742	1.16343e+08	145494164	1.2252e+08	1.42328e+08
Q9D1G5	Leucine-rich repeat-containing protein 57 OS=Mus musculus OX=10090 GN=Lrrc57 PE=1 SV=1	2	26613135	1.30145e+07	15595397	1.15875e+07	1.60545e+07	10894281	22619608	18922390	15608516
Q9D1H7	Golgi to ER traffic protein 4 homolog OS=Mus musculus OX=10090 GN=Get4 PE=1 SV=2	1	11497025	5.84756e+06	15975695	6493868	6.53652e+06	6816863	5444731	7307325
Q9D1K7	UPF0687 protein C20orf27 homolog OS=Mus musculus OX=10090 PE=1 SV=3	1	26207734	19493210	12263022	22519334	22240074	22344846	23538700	19927908	22621952
Q9D1M0	Protein SEC13 homolog OS=Mus musculus OX=10090 GN=Sec13 PE=1 SV=3	2	48819868	3.83624e+07	21728480	2.69876e+07	37707109	25628672	3.25144e+07	24635374	24252344
Q9D1P4	Cysteine and histidine-rich domain-containing protein 1 OS=Mus musculus OX=10090 GN=Chordc1 PE=1 SV=1	9	2.69659e+08	182681694	1.08847e+08	201051803	2.06363e+08	1.45341e+08	1.79713e+08	188595739	169619462
Q9D1Q6	Endoplasmic reticulum resident protein 44 OS=Mus musculus OX=10090 GN=Erp44 PE=1 SV=1	1	1.20175e+07	11950227	11765478	7743454	14842655	8095545	8.19286e+06	12513073	9401956
Q9D1T0	Leucine-rich repeat and immunoglobulin-like domain-containing nogo receptor-interacting protein 1 OS=Mus musculus OX=10090 GN=Lingo1 PE=1 SV=1	6	138032535	1.0388e+08	8.83523e+07	112751879	98591537	88462974	102392349	1.08647e+08	1.07586e+08
Q9D289	Trafficking protein particle complex subunit 6B OS=Mus musculus OX=10090 GN=Trappc6b PE=1 SV=1	2	1.90619e+07	1.82994e+07	1.59013e+07	1.1092e+07	1.56039e+07	1.18276e+07	1.65904e+07	1.83808e+07	1.98131e+07
Q9D2G5	Synaptojanin-2 OS=Mus musculus OX=10090 GN=Synj2 PE=1 SV=2	1	8684315	7044242			19605924	15208812	5.64543e+06	12566891	12574335
Q9D2M8	Ubiquitin-conjugating enzyme E2 variant 2 OS=Mus musculus OX=10090 GN=Ube2v2 PE=1 SV=4	3	84248619	8.28472e+07	78088396	7.93275e+07	98977565	6.80564e+07	7.65464e+07	79683315	8.03569e+07
Q9D2N4	Dystrobrevin alpha OS=Mus musculus OX=10090 GN=Dtna PE=1 SV=2	4	36165861	29358451	1.62472e+07	20113315	29410760	1.85735e+07	24845581	2.26e+07	2.09998e+07
Q9D2N9	Vacuolar protein sorting-associated protein 33A OS=Mus musculus OX=10090 GN=Vps33a PE=1 SV=2	2	9614336	8.57603e+06	8.97989e+06	2.03874e+06	6.84221e+06	6.7239e+06	3941270	7.77424e+06	9653786
Q9D2R0	Acetoacetyl-CoA synthetase OS=Mus musculus OX=10090 GN=Aacs PE=1 SV=1	12	2.27769e+08	174890160	160798472	110196119	75504613	88438496	1.50326e+08	1.47601e+08	1.38043e+08
Q9D2V7	Coronin-7 OS=Mus musculus OX=10090 GN=Coro7 PE=1 SV=2	11	1.85962e+08	1.43655e+08	110929833	1.54413e+08	1.41402e+08	1.04645e+08	1.50296e+08	1.38452e+08	1.42246e+08
Q9D358	Low molecular weight phosphotyrosine protein phosphatase OS=Mus musculus OX=10090 GN=Acp1 PE=1 SV=3	4	155326440	135081545	8.51985e+07	1.30551e+08	1.21829e+08	102995888	121524180	119246217	125151381
Q9D379	Epoxide hydrolase 1 OS=Mus musculus OX=10090 GN=Ephx1 PE=1 SV=2	1	10691914		10093292	24295320	4827359				18499492
Q9D387	Lysosome-associated membrane glycoprotein 5 OS=Mus musculus OX=10090 GN=Lamp5 PE=1 SV=2	2	3.85516e+07	3.7121e+07	27970552	55106710	57524819	2.31045e+07	47577292	44235671	4.79909e+07
Q9D394	Protein RUFY3 OS=Mus musculus OX=10090 GN=Rufy3 PE=1 SV=1	28	1944873209	1431650178	1054182354	441477929	4.07353e+08	3.03596e+08	8.14716e+08	8.44681e+08	8.74167e+08
Q9D3D9	ATP synthase subunit delta, mitochondrial OS=Mus musculus OX=10090 GN=Atp5f1d PE=1 SV=1	2	2.38498e+07	3.23018e+07	2.16481e+07	23726023	2.65527e+07	2.49272e+07	2.29874e+07	2.40308e+07	2.37205e+07
Q9D415	Disks large-associated protein 1 OS=Mus musculus OX=10090 GN=Dlgap1 PE=1 SV=3	4	5.55176e+07	4.45791e+07	26715638	12595545	30045710	2.12245e+07	38968099	21958123	3.18999e+07
Q9D4C9	Clavesin-1 OS=Mus musculus OX=10090 GN=Clvs1 PE=1 SV=1	3	25183174	20762949	2.14725e+07	1.45533e+07	13717111	7933672	20666999	12445164	17208986
Q9D4H1	Exocyst complex component 2 OS=Mus musculus OX=10090 GN=Exoc2 PE=1 SV=1	4	144116723	6.503e+07	1.20977e+08	2.19018e+08	184560039	1.89161e+08	8.10211e+07	2.01551e+07	5.53338e+07
Q9D4H8	Cullin-2 OS=Mus musculus OX=10090 GN=Cul2 PE=1 SV=2	18	348386249	2.89442e+08	2.54573e+08	291414803	317070197	262929439	2.63452e+08	2.73952e+08	3.20093e+08
Q9D517	1-acyl-sn-glycerol-3-phosphate acyltransferase gamma OS=Mus musculus OX=10090 GN=Agpat3 PE=1 SV=2	5	42211997	17701563	1.50051e+07	35708929	38369489	3.09098e+07	48005683	1.75195e+07	20118729
Q9D5V5	Cullin-5 OS=Mus musculus OX=10090 GN=Cul5 PE=1 SV=3	6	4.96755e+07	2.80685e+07	5.39808e+07	23982576	30876835	42438482	3.59337e+07	3.92819e+07	5.10619e+07
Q9D662	Protein transport protein Sec23B OS=Mus musculus OX=10090 GN=Sec23b PE=1 SV=1	1	3.58833e+06	3.35992e+06	3.8959e+06	3.53202e+06	2.68364e+06	2.42912e+06	3812508	3157467	3.39338e+06
Q9D6F9	Tubulin beta-4A chain OS=Mus musculus OX=10090 GN=Tubb4a PE=1 SV=3	15	5197908532	3916555364	3451410744	4419604621	4366869908	3813031516	3742214848	3965686474	4200030243
Q9D6M3	Mitochondrial glutamate carrier 1 OS=Mus musculus OX=10090 GN=Slc25a22 PE=1 SV=1	11	1802478680	1444413329	1326199959	1417150112	1568279766	1325950909	1442996420	1440782895	1476952848
Q9D6Y9	1,4-alpha-glucan-branching enzyme OS=Mus musculus OX=10090 GN=Gbe1 PE=1 SV=1	5	5.7198e+07	3.10182e+07	2.71918e+07	3.03306e+07	1.28365e+07	2.20466e+07	3.22067e+07	2.80226e+07	3.26144e+07
Q9D710	Thioredoxin-related transmembrane protein 2 OS=Mus musculus OX=10090 GN=Tmx2 PE=1 SV=1	4	1.11639e+08	7.02082e+07	4.98653e+07	82705491	78271866	81431031	84767992	76014865	86348367
Q9D7A8	Armadillo repeat-containing protein 1 OS=Mus musculus OX=10090 GN=Armc1 PE=1 SV=1	1	18591432	19420186	14546899		15191429	12838224	14746724	13806036	10805661
Q9D7B6	Isobutyryl-CoA dehydrogenase, mitochondrial OS=Mus musculus OX=10090 GN=Acad8 PE=1 SV=2	8	118436658	9.79098e+07	92460647	1.08729e+08	110757431	102242324	9.49239e+07	103715729	1.08661e+08
Q9D7G0	Ribose-phosphate pyrophosphokinase 1 OS=Mus musculus OX=10090 GN=Prps1 PE=1 SV=4	6	1.87301e+08	1.1607e+08	1.27913e+08	176142674	1.11544e+08	1.19438e+08	1.3296e+08	1.41615e+08	148275983
Q9D7H3	RNA 3'-terminal phosphate cyclase OS=Mus musculus OX=10090 GN=RtcA PE=1 SV=2	3	25819266	21809988	26870738	3.36995e+07	1.94555e+07	1.77084e+07	18938688	20852982	23159231
Q9D7N9	Adipocyte plasma membrane-associated protein OS=Mus musculus OX=10090 GN=Apmap PE=1 SV=1	6	62479996	52585276	6.59461e+07	5.48738e+07	4.13729e+07	5.2433e+07	4.01239e+07	6.06304e+07	4.90404e+07
Q9D7X3	Dual specificity protein phosphatase 3 OS=Mus musculus OX=10090 GN=Dusp3 PE=1 SV=1	5	168753184	1.27613e+08	94423442	1.0343e+08	101362364	90198134	1.02901e+08	9.69892e+07	1.16217e+08
Q9D7X8	Gamma-glutamylcyclotransferase OS=Mus musculus OX=10090 GN=Ggct PE=1 SV=1	2	23152235	21939718	2.04827e+07	16236908	17933522	2.12782e+07	19009378	1.79477e+07	22033165
Q9D819	Inorganic pyrophosphatase OS=Mus musculus OX=10090 GN=Ppa1 PE=1 SV=1	6	211031724	197948270	124203601	197053911	165688242	1.53192e+08	1.69633e+08	159787262	160371790
Q9D832	DnaJ homolog subfamily B member 4 OS=Mus musculus OX=10090 GN=Dnajb4 PE=1 SV=1	2	1.10733e+07	1.04429e+07	6.5472e+06	7.63042e+06	7468985	6.18016e+06	1.01643e+07	13056976	2.01313e+06
Q9D892	Inosine triphosphate pyrophosphatase OS=Mus musculus OX=10090 GN=Itpa PE=1 SV=2	3	1.03007e+08	7.63076e+07	7.0605e+07	75267940	7.18306e+07	63899198	74683571	6.76896e+07	7.9933e+07
Q9D898	Actin-related protein 2/3 complex subunit 5-like protein OS=Mus musculus OX=10090 GN=Arpc5l PE=1 SV=1	5	302161068	239550006	157790433	2.00226e+07	11343542	4825060	108293591	91087904	104103491
Q9D8B3	Charged multivesicular body protein 4b OS=Mus musculus OX=10090 GN=Chmp4b PE=1 SV=2	1	8730133	8.30381e+06	5772389				2.52915e+06	3.91995e+06	3.52177e+06
Q9D8B7	Junctional adhesion molecule C OS=Mus musculus OX=10090 GN=Jam3 PE=1 SV=2	3	3.66508e+07	3.17013e+07	11655248	40435576	42287347	2.61095e+07	29393074	35630080	3.81247e+07
Q9D8E6	60S ribosomal protein L4 OS=Mus musculus OX=10090 GN=Rpl4 PE=1 SV=3	2	25082333	1.52209e+07	10026521	1.44715e+07	1.25962e+07	1.44986e+07	1.49746e+07	1.77526e+07	1.61775e+07
Q9D8N0	Elongation factor 1-gamma OS=Mus musculus OX=10090 GN=Eef1g PE=1 SV=3	16	1148677302	9.47789e+08	9.10686e+08	8.40141e+08	869735393	780724067	907448574	9.08977e+08	9.20377e+08
[truncated: 313 more rows]

## Sheet: WASH1-BioID
Identifying Information			Statistics								Enriched in WASH1-BioID
Uniprot Protein ID	Entrez Gene ID	Symbol	Contrast	log2(FoldChange)	Percent(Control)	SE	Tstatistic	Pvalue	DF	FDR	candidate
Q8VDD8	68767	Washc1	WASH1BioID_vs_solubleBioID	7.45597	175.578	0.193193	38.5934	6.10993e-10	7.54087	7.90486e-07	TRUE
Q3UMB9	319277	Washc4	WASH1BioID_vs_solubleBioID	4.98288	31.6226	0.132737	37.5395	7.52128e-10	7.54087	7.90486e-07	TRUE
Q7TQK5	70829	Ccdc93	WASH1BioID_vs_solubleBioID	5.22883	37.5003	0.155821	33.5567	1.7444e-09	7.54087	1.10338e-06	TRUE
Q8C2E7	223593	Washc5	WASH1BioID_vs_solubleBioID	6.31074	79.3818	0.192772	32.7369	2.09968e-09	7.54087	1.10338e-06	TRUE
Q5SRX1	216810	Tom1l2	WASH1BioID_vs_solubleBioID	2.24249	4.73214	0.0724244	30.9632	3.18692e-09	7.54087	1.33978e-06	TRUE
O70492	54198	Snx3	WASH1BioID_vs_solubleBioID	2.5801	5.97982	0.085769	30.082	3.95592e-09	7.54087	1.38589e-06	TRUE
Q8CDN6	53382	Txnl1	WASH1BioID_vs_solubleBioID	4.68169	25.6642	0.161535	28.9826	5.22688e-09	7.54087	1.56956e-06	TRUE
Q8VCE2	74254	Gpn1	WASH1BioID_vs_solubleBioID	4.95862	31.0952	0.196118	25.2838	1.44971e-08	7.54087	3.04729e-06	TRUE
Q8BW96	227541	Camk1d	WASH1BioID_vs_solubleBioID	2.10839	4.31211	0.0871113	24.2034	2.00791e-08	7.54087	3.83693e-06	TRUE
Q62418	13169	Dbnl	WASH1BioID_vs_solubleBioID	3.56704	11.8518	0.15443	23.098	2.84454e-08	7.54087	4.98269e-06	TRUE
Q8CJ67	29819	Stau2	WASH1BioID_vs_solubleBioID	3.86386	14.5592	0.174524	22.1394	3.89961e-08	7.54087	6.30537e-06	TRUE
O35668	15114	Hap1	WASH1BioID_vs_solubleBioID	2.99191	7.95527	0.139528	21.4431	4.94563e-08	7.54087	6.93047e-06	TRUE
Q80XQ2	72238	Tbc1d5	WASH1BioID_vs_solubleBioID	3.80873	14.0133	0.180937	21.05	5.67441e-08	7.54087	7.01624e-06	TRUE
P54227	16765	Stmn1	WASH1BioID_vs_solubleBioID	5.35603	40.9568	0.257266	20.8191	6.15885e-08	7.54087	7.19216e-06	TRUE
Q99MK8	110355	Grk2	WASH1BioID_vs_solubleBioID	2.24685	4.74645	0.111787	20.0994	7.99608e-08	7.54087	8.40388e-06	TRUE
Q8CDG3	70675	Vcpip1	WASH1BioID_vs_solubleBioID	3.30467	9.88109	0.16812	19.6566	9.43224e-08	7.54087	9.44122e-06	TRUE
Q8BM65	241134	Nyap2	WASH1BioID_vs_solubleBioID	4.92143	30.3038	0.265886	18.5096	1.4721e-07	7.54087	1.1824e-05	TRUE
P62192	19179	Psmc1	WASH1BioID_vs_solubleBioID	2.07412	4.21087	0.112235	18.4801	1.48956e-07	7.54087	1.1824e-05	TRUE
Q60598	13043	Cttn	WASH1BioID_vs_solubleBioID	4.1782	18.1035	0.226687	18.4316	1.51878e-07	7.54087	1.1824e-05	TRUE
Q7TMK9	56403	Syncrip	WASH1BioID_vs_solubleBioID	2.31358	4.97115	0.127104	18.2023	1.66605e-07	7.54087	1.25073e-05	TRUE
Q9CYZ2	66314	Tpd52l2	WASH1BioID_vs_solubleBioID	4.09323	17.0681	0.226973	18.034	1.78439e-07	7.54087	1.29338e-05	TRUE
Q9CZ44	386649	Nsfl1c	WASH1BioID_vs_solubleBioID	5.55959	47.1631	0.312005	17.8189	1.94976e-07	7.54087	1.36613e-05	TRUE
P12367	19087	Prkar2a	WASH1BioID_vs_solubleBioID	2.38923	5.23877	0.141576	16.876	2.91164e-07	7.54087	1.85463e-05	TRUE
Q6PGL7	28006	Washc2	WASH1BioID_vs_solubleBioID	5.64613	50.0789	0.340093	16.6017	3.28504e-07	7.54087	2.03093e-05	TRUE
Q80XI3	230861	Eif4g3	WASH1BioID_vs_solubleBioID	3.36042	10.2704	0.208029	16.1536	4.01748e-07	7.54087	2.33383e-05	TRUE
Q8CE50	209131	Snx30	WASH1BioID_vs_solubleBioID	3.87493	14.6714	0.239919	16.151	4.0223e-07	7.54087	2.33383e-05	TRUE
Q6P9Q6	338355	Fkbp15	WASH1BioID_vs_solubleBioID	4.50742	22.7441	0.282752	15.9413	4.42776e-07	7.54087	2.44925e-05	TRUE
Q6P9K8	268932	Caskin1	WASH1BioID_vs_solubleBioID	2.73941	6.67797	0.173577	15.7821	4.76637e-07	7.54087	2.53819e-05	TRUE
Q8CBW3	11308	Abi1	WASH1BioID_vs_solubleBioID	4.24914	19.016	0.271398	15.6565	5.05432e-07	7.54087	2.59126e-05	TRUE
Q91ZZ3	104069	Sncb	WASH1BioID_vs_solubleBioID	3.83694	14.2901	0.247721	15.489	5.46944e-07	7.54087	2.67403e-05	TRUE
Q8BNU0	76813	Armc6	WASH1BioID_vs_solubleBioID	5.1391	35.2389	0.333355	15.4163	5.66151e-07	7.54087	2.70466e-05	TRUE
Q9CR27	67282	Washc3	WASH1BioID_vs_solubleBioID	5.43214	43.1755	0.355001	15.3018	5.9796e-07	7.54087	2.79314e-05	TRUE
Q9QYJ3	81489	Dnajb1	WASH1BioID_vs_solubleBioID	3.4296	10.7749	0.226461	15.1443	6.45041e-07	7.54087	2.94331e-05	TRUE
P62484	329165	Abi2	WASH1BioID_vs_solubleBioID	2.87272	7.32445	0.190758	15.0595	6.72117e-07	7.54087	2.94331e-05	TRUE
Q80X50	74383	Ubap2l	WASH1BioID_vs_solubleBioID	4.6798	25.6308	0.316073	14.8061	7.61031e-07	7.54087	3.20781e-05	TRUE
Q9JKF6	58235	Nectin1	WASH1BioID_vs_solubleBioID	3.85367	14.4567	0.262165	14.6994	8.0236e-07	7.54087	3.30698e-05	TRUE
Q9R1Q8	56370	Tagln3	WASH1BioID_vs_solubleBioID	2.44138	5.43162	0.175495	13.9114	1.19968e-06	7.54087	4.63296e-05	TRUE
Q9WTM5	20174	Ruvbl2	WASH1BioID_vs_solubleBioID	5.43365	43.2208	0.390633	13.9099	1.20064e-06	7.54087	4.63296e-05	TRUE
Q3TY60	76156	Fam131b	WASH1BioID_vs_solubleBioID	4.27413	19.3482	0.308366	13.8606	1.23212e-06	7.54087	4.63296e-05	TRUE
Q8BIW1	229589	Prune1	WASH1BioID_vs_solubleBioID	2.10711	4.30828	0.152059	13.8572	1.23428e-06	7.54087	4.63296e-05	TRUE
Q9DC07	74103	Nebl	WASH1BioID_vs_solubleBioID	2.61057	6.10745	0.190633	13.6942	1.34537e-06	7.54087	4.88061e-05	TRUE
A2AQ25	208618	Etl4	WASH1BioID_vs_solubleBioID	3.63354	12.4109	0.272207	13.3485	1.62039e-06	7.54087	5.67544e-05	TRUE
P47941	12929	Crkl	WASH1BioID_vs_solubleBioID	2.31377	4.97181	0.173725	13.3186	1.64701e-06	7.54087	5.67544e-05	TRUE
P10637	17762	Mapt	WASH1BioID_vs_solubleBioID	2.78133	6.87484	0.210182	13.2329	1.72602e-06	7.54087	5.6983e-05	TRUE
P97855	27041	G3bp1	WASH1BioID_vs_solubleBioID	2.9788	7.8833	0.225266	13.2235	1.73497e-06	7.54087	5.6983e-05	TRUE
Q8CH77	215690	Nav1	WASH1BioID_vs_solubleBioID	4.04735	16.5339	0.309261	13.0872	1.8705e-06	7.54087	6.04892e-05	TRUE
Q8CIN4	224105	Pak2	WASH1BioID_vs_solubleBioID	3.43156	10.7896	0.266385	12.882	2.09763e-06	7.54087	6.49255e-05	TRUE
O35226	19185	Psmd4	WASH1BioID_vs_solubleBioID	2.70115	6.50319	0.209722	12.8797	2.10035e-06	7.54087	6.49255e-05	TRUE
Q9D394	52822	Rufy3	WASH1BioID_vs_solubleBioID	2.22884	4.68755	0.175573	12.6947	2.33242e-06	7.54087	6.90529e-05	TRUE
Q0KL01	68053	Ubxn2b	WASH1BioID_vs_solubleBioID	4.56558	23.6797	0.360887	12.651	2.39131e-06	7.54087	6.98129e-05	TRUE
P59325	217869	Eif5	WASH1BioID_vs_solubleBioID	2.51517	5.71665	0.201398	12.4886	2.62557e-06	7.54087	7.43556e-05	TRUE
P23506	18537	Pcmt1	WASH1BioID_vs_solubleBioID	4.76695	27.2267	0.382254	12.4706	2.65303e-06	7.54087	7.43556e-05	TRUE
Q3UTQ8	382253	Cdkl5	WASH1BioID_vs_solubleBioID	3.83251	14.2463	0.308183	12.4358	2.70714e-06	7.54087	7.48737e-05	TRUE
Q99KJ8	69654	Dctn2	WASH1BioID_vs_solubleBioID	4.73725	26.6719	0.383397	12.356	2.83609e-06	7.54087	7.64291e-05	TRUE
Q0KK55	76484	Kndc1	WASH1BioID_vs_solubleBioID	2.90344	7.4821	0.23623	12.2908	2.9466e-06	7.54087	7.84019e-05	TRUE
Q8BGD9	75705	Eif4b	WASH1BioID_vs_solubleBioID	3.38766	10.4661	0.280003	12.0987	3.30129e-06	7.54087	8.26097e-05	TRUE
Q60996	26931	Ppp2r5c	WASH1BioID_vs_solubleBioID	2.00824	4.02292	0.166382	12.07	3.35813e-06	7.54087	8.26097e-05	TRUE
Q61062	13544	Dvl3	WASH1BioID_vs_solubleBioID	3.51279	11.4144	0.29218	12.0227	3.45463e-06	7.54087	8.26097e-05	TRUE
Q3UVL4	68505	Vps51	WASH1BioID_vs_solubleBioID	2.29863	4.9199	0.193162	11.9	3.71951e-06	7.54087	8.59165e-05	TRUE
Q9DCL8	66849	Ppp1r2	WASH1BioID_vs_solubleBioID	5.21617	37.1728	0.439164	11.8775	3.7705e-06	7.54087	8.61478e-05	TRUE
Q8K3E5	52906	Ahi1	WASH1BioID_vs_solubleBioID	2.69428	6.4723	0.227976	11.8183	3.90867e-06	7.54087	8.73586e-05	TRUE
Q68FM6	207393	Elfn2	WASH1BioID_vs_solubleBioID	3.22655	9.3603	0.275831	11.6976	4.20813e-06	7.54087	9.0789e-05	TRUE
Q80TJ1	27062	Cadps	WASH1BioID_vs_solubleBioID	2.2809	4.85981	0.195148	11.6881	4.23279e-06	7.54087	9.0789e-05	TRUE
Q80Y56	78287	Rbsn	WASH1BioID_vs_solubleBioID	5.67698	51.1613	0.491018	11.5616	4.57671e-06	7.54087	9.71742e-05	TRUE
Q9D898	74192	Arpc5l	WASH1BioID_vs_solubleBioID	4.76178	27.1293	0.417496	11.4056	5.04552e-06	7.54087	0.000102968	TRUE
Q9WV80	56440	Snx1	WASH1BioID_vs_solubleBioID	6.46602	88.4028	0.57081	11.3278	5.29913e-06	7.54087	0.000107103	TRUE
Q9WUK2	22384	Eif4h	WASH1BioID_vs_solubleBioID	2.21445	4.64104	0.196834	11.2503	5.56618e-06	7.54087	0.00011143	TRUE
Q8C437	58869	Pex5l	WASH1BioID_vs_solubleBioID	2.78118	6.87415	0.252421	11.018	6.46209e-06	7.54087	0.000128145	TRUE
Q80Z38	210274	Shank2	WASH1BioID_vs_solubleBioID	2.57109	5.94259	0.235657	10.9103	6.93176e-06	7.54087	0.000134913	TRUE
Q8CC35	104027	Synpo	WASH1BioID_vs_solubleBioID	2.58833	6.01402	0.240491	10.7627	7.63922e-06	7.54087	0.000145979	TRUE
Q7TQD2	72948	Tppp	WASH1BioID_vs_solubleBioID	2.43013	5.38943	0.228093	10.6541	8.21134e-06	7.54087	0.000154109	TRUE
Q8BWQ6	71517	Vps35l	WASH1BioID_vs_solubleBioID	2.45884	5.49775	0.232745	10.5645	8.72008e-06	7.54087	0.000159323	TRUE
Q62417	20411	Sorbs1	WASH1BioID_vs_solubleBioID	2.45908	5.49866	0.23554	10.4402	9.48562e-06	7.54087	0.000167245	TRUE
Q9Z1X4	16201	Ilf3	WASH1BioID_vs_solubleBioID	2.15052	4.43987	0.206174	10.4306	9.54774e-06	7.54087	0.000167245	TRUE
O55042	20617	Snca	WASH1BioID_vs_solubleBioID	4.63997	24.9327	0.446641	10.3886	9.82545e-06	7.54087	0.000169387	TRUE
Q8C8T7	243312	Elfn1	WASH1BioID_vs_solubleBioID	3.98381	15.8215	0.383512	10.3877	9.8312e-06	7.54087	0.000169387	TRUE
Q5SV85	217030	Synrg	WASH1BioID_vs_solubleBioID	3.61466	12.2496	0.358456	10.084	1.21322e-05	7.54087	0.000199283	TRUE
Q8K1A6	212139	Cc2d1a	WASH1BioID_vs_solubleBioID	2.35558	5.11802	0.233671	10.0808	1.21597e-05	7.54087	0.000199283	TRUE
Q8BWS5	243385	Gprin3	WASH1BioID_vs_solubleBioID	2.3423	5.07111	0.232543	10.0725	1.223e-05	7.54087	0.000199283	TRUE
Q78ZA7	17955	Nap1l4	WASH1BioID_vs_solubleBioID	2.9786	7.8822	0.29618	10.0567	1.23669e-05	7.54087	0.000199963	TRUE
O55106	268980	Strn	WASH1BioID_vs_solubleBioID	2.55535	5.87811	0.256243	9.97237	1.31254e-05	7.54087	0.000208589	TRUE
Q7TQF7	218038	Amph	WASH1BioID_vs_solubleBioID	2.58483	5.99945	0.264783	9.76206	1.52552e-05	7.54087	0.000232671	TRUE
Q68ED7	382056	Crtc1	WASH1BioID_vs_solubleBioID	4.20551	18.4496	0.430882	9.76024	1.52753e-05	7.54087	0.000232671	TRUE
Q66L42	269881	Map3k10	WASH1BioID_vs_solubleBioID	3.06869	8.39013	0.317678	9.65975	1.64298e-05	7.54087	0.000245358	TRUE
Q4ACU6	58234	Shank3	WASH1BioID_vs_solubleBioID	3.58458	11.9968	0.371623	9.64576	1.65981e-05	7.54087	0.000245358	TRUE
Q8VDJ3	110611	Hdlbp	WASH1BioID_vs_solubleBioID	2.41518	5.33386	0.251501	9.60308	1.71239e-05	7.54087	0.000249962	TRUE
Q8BJ42	244310	Dlgap2	WASH1BioID_vs_solubleBioID	3.55888	11.785	0.373233	9.53526	1.79983e-05	7.54087	0.000259126	TRUE
Q9CRB6	67971	Tppp3	WASH1BioID_vs_solubleBioID	3.55107	11.7214	0.378353	9.38561	2.01106e-05	7.54087	0.000279951	TRUE
A2AHC3	227634	Camsap1	WASH1BioID_vs_solubleBioID	2.2929	4.9004	0.245646	9.33417	2.09001e-05	7.54087	0.000283432	TRUE
Q9D8Y0	27984	Efhd2	WASH1BioID_vs_solubleBioID	4.18799	18.2268	0.450085	9.3049	2.13646e-05	7.54087	0.000287875	TRUE
Q812A2	259302	Srgap3	WASH1BioID_vs_solubleBioID	2.25375	4.76922	0.24327	9.2644	2.20268e-05	7.54087	0.000291845	TRUE
Q99KN9	216705	Clint1	WASH1BioID_vs_solubleBioID	2.12881	4.37357	0.230063	9.25316	2.22147e-05	7.54087	0.000291845	TRUE
A2ALU4	110380	Shroom2	WASH1BioID_vs_solubleBioID	3.04601	8.25923	0.330865	9.2062	2.3019e-05	7.54087	0.000300534	TRUE
Q3UH99	380702	Shisa6	WASH1BioID_vs_solubleBioID	2.22735	4.68274	0.243732	9.13852	2.42365e-05	7.54087	0.000309579	TRUE
Q62420	20404	Sh3gl2	WASH1BioID_vs_solubleBioID	2.2572	4.78063	0.247093	9.13505	2.43009e-05	7.54087	0.000309579	TRUE
Q7TSC1	53761	Prrc2a	WASH1BioID_vs_solubleBioID	2.69055	6.45557	0.295343	9.10991	2.47727e-05	7.54087	0.000309915	TRUE
Q80TE7	242274	Lrrc7	WASH1BioID_vs_solubleBioID	3.00974	8.05419	0.330832	9.09748	2.50098e-05	7.54087	0.000309915	TRUE
P07758	20700	Serpina1a	WASH1BioID_vs_solubleBioID	2.27579	4.84262	0.250652	9.07949	2.53576e-05	7.54087	0.000309915	TRUE
Q61161	26412	Map4k2	WASH1BioID_vs_solubleBioID	2.11704	4.33803	0.233997	9.04729	2.59936e-05	7.54087	0.000315829	TRUE
Q8K221	76932	Arfip2	WASH1BioID_vs_solubleBioID	4.2386	18.8775	0.475105	8.92138	2.8658e-05	7.54087	0.000338422	TRUE
O08919	18223	Numbl	WASH1BioID_vs_solubleBioID	2.03035	4.08504	0.23216	8.74547	3.29089e-05	7.54087	0.000366469	TRUE
Q8C129	240028	Lnpep	WASH1BioID_vs_solubleBioID	2.99182	7.95479	0.343084	8.72038	3.35709e-05	7.54087	0.0003714	TRUE
Q6PFD5	242667	Dlgap3	WASH1BioID_vs_solubleBioID	2.80507	6.98892	0.323055	8.68296	3.45861e-05	7.54087	0.000380629	TRUE
Q3UHX2	231887	Pdap1	WASH1BioID_vs_solubleBioID	4.72172	26.3864	0.546077	8.64662	3.5605e-05	7.54087	0.000387781	TRUE
O08539	30948	Bin1	WASH1BioID_vs_solubleBioID	2.1812	4.53531	0.256226	8.51281	3.96581e-05	7.54087	0.000416807	TRUE
Q6P8I4	76302	Pcnp	WASH1BioID_vs_solubleBioID	2.83788	7.14971	0.335851	8.44983	4.17428e-05	7.54087	0.000432233	TRUE
F6SEU4	240057	Syngap1	WASH1BioID_vs_solubleBioID	2.14481	4.42233	0.25521	8.40407	4.33344e-05	7.54087	0.000444337	TRUE
A2ALK8	545622	Ptpn3	WASH1BioID_vs_solubleBioID	2.17487	4.51544	0.259454	8.38247	4.41094e-05	7.54087	0.000445759	TRUE
Q9QZQ1	17356	Afdn	WASH1BioID_vs_solubleBioID	2.14517	4.42344	0.257061	8.34499	4.54912e-05	7.54087	0.000455346	TRUE
Q8CHU3	13855	Epn2	WASH1BioID_vs_solubleBioID	2.6065	6.09026	0.312798	8.33286	4.59487e-05	7.54087	0.00045655	TRUE
Q6PFX8	194237	Rimkla	WASH1BioID_vs_solubleBioID	3.69373	12.9397	0.455199	8.11455	5.51304e-05	7.54087	0.000523241	TRUE
Q80YA9	245684	Cnksr2	WASH1BioID_vs_solubleBioID	2.43623	5.41226	0.300622	8.10395	5.56257e-05	7.54087	0.000523241	TRUE
Q9JKK7	50876	Tmod2	WASH1BioID_vs_solubleBioID	4.41389	21.3163	0.547801	8.05746	5.78586e-05	7.54087	0.000538136	TRUE
Q8BHG2	74098	Czib	WASH1BioID_vs_solubleBioID	3.13533	8.78674	0.389377	8.05216	5.81195e-05	7.54087	0.000538181	TRUE
Q7TSY6	108013	Celf4	WASH1BioID_vs_solubleBioID	2.16094	4.47205	0.274261	7.87913	6.74039e-05	7.54087	0.000605483	TRUE
Q99P72	68585	Rtn4	WASH1BioID_vs_solubleBioID	2.19997	4.59469	0.286866	7.66898	8.09853e-05	7.54087	0.000703435	TRUE
P51141	13542	Dvl1	WASH1BioID_vs_solubleBioID	2.88608	7.39259	0.376562	7.6643	8.1321e-05	7.54087	0.000703443	TRUE
Q5FW52	69642	Mlip	WASH1BioID_vs_solubleBioID	2.9396	7.67198	0.387022	7.59543	8.64409e-05	7.54087	0.000735622	TRUE
P60122	56505	Ruvbl1	WASH1BioID_vs_solubleBioID	2.39052	5.24347	0.318096	7.51509	9.28751e-05	7.54087	0.000783201	TRUE
Q9ES97	20168	Rtn3	WASH1BioID_vs_solubleBioID	2.00052	4.00145	0.266355	7.51076	9.32372e-05	7.54087	0.000783201	TRUE
Q3UHE1	327958	Pitpnm3	WASH1BioID_vs_solubleBioID	2.14311	4.41714	0.288414	7.43067	0.000100218	7.54087	0.00082864	TRUE
Q5HZI2	237397	C2cd4c	WASH1BioID_vs_solubleBioID	2.67644	6.39278	0.365198	7.32875	0.000109962	7.54087	0.000899374	TRUE
P70297	20844	Stam	WASH1BioID_vs_solubleBioID	3.82717	14.1937	0.523586	7.30954	0.000111914	7.54087	0.000911016	TRUE
Q9CQH7	70533	Btf3l4	WASH1BioID_vs_solubleBioID	2.20723	4.61787	0.302804	7.28929	0.000114014	7.54087	0.000921762	TRUE
Q9CX00	71955	Ist1	WASH1BioID_vs_solubleBioID	5.99145	63.6219	0.822546	7.28403	0.000114567	7.54087	0.000922678	TRUE
P39087	14806	Grik2	WASH1BioID_vs_solubleBioID	2.40733	5.30491	0.332334	7.24369	0.000118906	7.54087	0.000950348	TRUE
O88643	18479	Pak1	WASH1BioID_vs_solubleBioID	2.0715	4.20325	0.287822	7.19717	0.000124141	7.54087	0.000980994	TRUE
Q6A065	545389	Cep170	WASH1BioID_vs_solubleBioID	3.1015	8.58313	0.433009	7.16267	0.000128188	7.54087	0.000997966	TRUE
Q9JHQ5	93730	Lztfl1	WASH1BioID_vs_solubleBioID	2.32194	5.00004	0.327189	7.09663	0.000136354	7.54087	0.00103846	TRUE
Q9Z1Q5	114584	Clic1	WASH1BioID_vs_solubleBioID	2.22881	4.68746	0.319178	6.98296	0.000151802	7.54087	0.00112355	TRUE
Q9CPW4	67771	Arpc5	WASH1BioID_vs_solubleBioID	3.22126	9.326	0.463643	6.94771	0.000156982	7.54087	0.00114575	TRUE
Q8K2Q0	76501	Commd9	WASH1BioID_vs_solubleBioID	3.33807	10.1125	0.480845	6.9421	0.000157825	7.54087	0.00114751	TRUE
P59759	239719	Mrtfb	WASH1BioID_vs_solubleBioID	3.65231	12.5735	0.526357	6.93885	0.000158315	7.54087	0.00114751	TRUE
Q6PGC1	218629	Dhx29	WASH1BioID_vs_solubleBioID	2.57454	5.95683	0.372045	6.91999	0.000161195	7.54087	0.00116241	TRUE
Q5SVL6	380711	Rap1gap2	WASH1BioID_vs_solubleBioID	2.15597	4.45669	0.311639	6.91816	0.000161476	7.54087	0.00116241	TRUE
A2AIW0	68112	Entr1	WASH1BioID_vs_solubleBioID	3.58764	12.0223	0.518928	6.91356	0.00016219	7.54087	0.00116356	TRUE
Q62448	13690	Eif4g2	WASH1BioID_vs_solubleBioID	4.72175	26.3869	0.694957	6.7943	0.000181941	7.54087	0.00127056	TRUE
P20357	17756	Map2	WASH1BioID_vs_solubleBioID	2.75568	6.75372	0.405893	6.78918	0.000182848	7.54087	0.00127267	TRUE
Q8R550	58194	Sh3kbp1	WASH1BioID_vs_solubleBioID	3.86015	14.5218	0.571163	6.7584	0.000188401	7.54087	0.0012978	TRUE
Q3UNH4	26913	Gprin1	WASH1BioID_vs_solubleBioID	2.47931	5.57632	0.386062	6.42206	0.000263051	7.54087	0.00165054	TRUE
Q3TES0	243621	Iqsec3	WASH1BioID_vs_solubleBioID	2.29104	4.8941	0.364478	6.28582	0.000302228	7.54087	0.0018203	TRUE
P39447	21872	Tjp1	WASH1BioID_vs_solubleBioID	6.14479	70.7566	1.02992	5.96628	0.000422179	7.54087	0.00234274	TRUE
Q922Q8	98238	Lrrc59	WASH1BioID_vs_solubleBioID	2.21197	4.63306	0.380324	5.816	0.000496184	7.54087	0.00259447	TRUE
Q6PDI5	230249	Ecpas	WASH1BioID_vs_solubleBioID	2.11343	4.32719	0.364027	5.8057	0.000501759	7.54087	0.00260419	TRUE
Q6P8X1	72183	Snx6	WASH1BioID_vs_solubleBioID	2.1629	4.47815	0.375811	5.7553	0.000530062	7.54087	0.00273086	TRUE
Q6ZQ08	234594	Cnot1	WASH1BioID_vs_solubleBioID	2.0904	4.25867	0.364451	5.73576	0.000541507	7.54087	0.00274939	TRUE
D3YVF0	238276	Akap5	WASH1BioID_vs_solubleBioID	3.61641	12.2644	0.639665	5.6536	0.000592708	7.54087	0.00293436	TRUE
B1AZP2	228836	Dlgap4	WASH1BioID_vs_solubleBioID	3.88231	14.7466	0.688292	5.64049	0.000601361	7.54087	0.00293968	TRUE
Q9CQ80	28084	Vps25	WASH1BioID_vs_solubleBioID	4.66234	25.3224	0.847984	5.49815	0.000704901	7.54087	0.0033	TRUE
Q80Y24	243548	Prickle2	WASH1BioID_vs_solubleBioID	3.90351	14.9649	0.71706	5.44377	0.000749534	7.54087	0.00344	TRUE
Q810B7	75409	Slitrk5	WASH1BioID_vs_solubleBioID	3.69577	12.958	0.684722	5.39748	0.000789987	7.54087	0.00357108	TRUE
Q9CWK8	67804	Snx2	WASH1BioID_vs_solubleBioID	3.04417	8.24873	0.56777	5.36163	0.000822985	7.54087	0.0036964	TRUE
Q9QXJ1	11785	Apbb1	WASH1BioID_vs_solubleBioID	2.92611	7.60057	0.547519	5.3443	0.000839472	7.54087	0.00374096	TRUE
Q8C080	74718	Snx16	WASH1BioID_vs_solubleBioID	2.94294	7.68976	0.551461	5.33662	0.000846893	7.54087	0.00376357	TRUE
Q9DBX2	67466	Pdcl	WASH1BioID_vs_solubleBioID	2.56778	5.92897	0.497981	5.15639	0.00104371	7.54087	0.00434433	TRUE
Q8C5L3	72068	Cnot2	WASH1BioID_vs_solubleBioID	3.15014	8.87742	0.61923	5.08719	0.00113225	7.54087	0.00463334	TRUE
Q9JI78	59007	Ngly1	WASH1BioID_vs_solubleBioID	2.12247	4.35439	0.429275	4.94432	0.00134237	7.54087	0.00529666	TRUE
Q6PEV3	68524	Wipf2	WASH1BioID_vs_solubleBioID	2.42913	5.38569	0.49343	4.92294	0.00137735	7.54087	0.00538138	TRUE
Q78JW9	28018	Ubfd1	WASH1BioID_vs_solubleBioID	2.71966	6.58719	0.554194	4.90742	0.00140337	7.54087	0.00544226	TRUE
Q80XK6	76559	Atg2b	WASH1BioID_vs_solubleBioID	2.83956	7.15801	0.580182	4.89426	0.00142586	7.54087	0.00547587	TRUE
Q80VP1	13854	Epn1	WASH1BioID_vs_solubleBioID	2.43568	5.41019	0.508854	4.7866	0.00162538	7.54087	0.00609097	TRUE
Q64337	18412	Sqstm1	WASH1BioID_vs_solubleBioID	2.45559	5.48536	0.517177	4.74806	0.00170411	7.54087	0.00632869	TRUE
Q80Y55	100383	Bsdc1	WASH1BioID_vs_solubleBioID	2.2253	4.67608	0.475823	4.67673	0.00186103	7.54087	0.00670242	TRUE
Q91XV3	70350	Basp1	WASH1BioID_vs_solubleBioID	2.07069	4.20086	0.453352	4.5675	0.00213291	7.54087	0.00744955	TRUE
Q7M6Y3	233489	Picalm	WASH1BioID_vs_solubleBioID	2.78769	6.90525	0.614511	4.53644	0.00221792	7.54087	0.00769318	TRUE
Q3TLH4	226562	Prrc2c	WASH1BioID_vs_solubleBioID	2.21981	4.65833	0.496795	4.46827	0.00241783	7.54087	0.00819722	TRUE
Q9CZ04	26894	Cops7a	WASH1BioID_vs_solubleBioID	2.86853	7.30319	0.64336	4.45867	0.00244754	7.54087	0.00828459	TRUE
Q68FD9	330286	D630045J12Rik	WASH1BioID_vs_solubleBioID	2.35318	5.1095	0.550709	4.27301	0.00310766	7.54087	0.0098381	TRUE
Q91VX2	68926	Ubap2	WASH1BioID_vs_solubleBioID	2.22235	4.66654	0.563184	3.94605	0.00479157	7.54087	0.0136205	TRUE
A2AHG0	241638	Lzts3	WASH1BioID_vs_solubleBioID	2.54483	5.83541	0.662184	3.84309	0.00550958	7.54087	0.0150209	TRUE
Q62083	18693	Pick1	WASH1BioID_vs_solubleBioID	2.08563	4.24459	0.54497	3.82705	0.00563158	7.54087	0.0152743	TRUE
P0DP27	12314	Calm2	WASH1BioID_vs_solubleBioID	3.29342	9.80431	0.875976	3.75971	0.00617625	7.54087	0.0163302	TRUE
Q9CZN4	72555	Shisa9	WASH1BioID_vs_solubleBioID	2.05832	4.165	0.549737	3.74418	0.00630975	7.54087	0.0165789	TRUE
Q14CH0	241520	Fam171b	WASH1BioID_vs_solubleBioID	2.71126	6.54893	0.811298	3.34188	0.0111114	7.54087	0.0254425	TRUE
Q80WJ7	67154	Mtdh	WASH1BioID_vs_solubleBioID	2.53455	5.79397	0.832458	3.04466	0.0171115	7.54087	0.0358415	TRUE
Q9DCR2	11777	Ap3s1	WASH1BioID_vs_solubleBioID	0.615867	1.53248	0.0238237	25.851	1.22848e-08	7.54087	2.94611e-06	FALSE
Q3UR70	73122	Tgfbrap1	WASH1BioID_vs_solubleBioID	1.65052	3.13946	0.064074	25.7596	1.26142e-08	7.54087	2.94611e-06	FALSE
O55222	16202	Ilk	WASH1BioID_vs_solubleBioID	0.59887	1.51453	0.0278395	21.5115	4.82981e-08	7.54087	6.93047e-06	FALSE
Q923D2	233016	Blvrb	WASH1BioID_vs_solubleBioID	0.792156	1.73166	0.0375757	21.0816	5.61147e-08	7.54087	7.01624e-06	FALSE
P08553	18040	Nefm	WASH1BioID_vs_solubleBioID	1.83953	3.57893	0.0895092	20.5513	6.78009e-08	7.54087	7.50093e-06	FALSE
Q91Z67	14270	Srgap2	WASH1BioID_vs_solubleBioID	1.68282	3.21054	0.0863169	19.4958	1.00242e-07	7.54087	9.57767e-06	FALSE
Q4VBD2	231225	Tapt1	WASH1BioID_vs_solubleBioID	-2.67106	0.157011	0.14349	-18.6149	1.41159e-07	7.54087	1.1824e-05	FALSE
Q80TQ2	74256	Cyld	WASH1BioID_vs_solubleBioID	1.77261	3.41672	0.0956902	18.5245	1.46335e-07	7.54087	1.1824e-05	FALSE
P63001	19353	Rac1	WASH1BioID_vs_solubleBioID	0.458896	1.37449	0.0263892	17.3895	2.33436e-07	7.54087	1.578e-05	FALSE
P27546	17758	Map4	WASH1BioID_vs_solubleBioID	1.61683	3.06701	0.0933396	17.322	2.40228e-07	7.54087	1.578e-05	FALSE
Q03173	13800	Enah	WASH1BioID_vs_solubleBioID	0.978216	1.97003	0.0607411	16.1047	4.10808e-07	7.54087	2.33383e-05	FALSE
P63040	12889	Cplx1	WASH1BioID_vs_solubleBioID	1.87636	3.67148	0.119107	15.7536	4.83005e-07	7.54087	2.53819e-05	FALSE
Q7M750	226115	Opalin	WASH1BioID_vs_solubleBioID	-1.02696	0.490742	0.0663039	-15.4887	5.47018e-07	7.54087	2.67403e-05	FALSE
P62983	78294	Rps27a	WASH1BioID_vs_solubleBioID	1.24726	2.3739	0.082645	15.0917	6.61685e-07	7.54087	2.94331e-05	FALSE
O88809	13193	Dcx	WASH1BioID_vs_solubleBioID	1.23721	2.35743	0.0835913	14.8008	7.63037e-07	7.54087	3.20781e-05	FALSE
P01942	15122	Hba-a1	WASH1BioID_vs_solubleBioID	0.754578	1.68714	0.0538999	13.9996	1.14567e-06	7.54087	4.63114e-05	FALSE
Q9WUA2	23874	Farsb	WASH1BioID_vs_solubleBioID	1.91132	3.76152	0.13959	13.6924	1.34669e-06	7.54087	4.88061e-05	FALSE
P63087	19047	Ppp1cc	WASH1BioID_vs_solubleBioID	1.65088	3.14025	0.122367	13.4912	1.49983e-06	7.54087	5.34348e-05	FALSE
O35295	19291	Purb	WASH1BioID_vs_solubleBioID	1.4881	2.80519	0.112313	13.2496	1.71029e-06	7.54087	5.6983e-05	FALSE
Q9D906	74244	Atg7	WASH1BioID_vs_solubleBioID	0.66278	1.58313	0.0508371	13.0373	1.92302e-06	7.54087	6.12454e-05	FALSE
P63163	20646	Snrpn	WASH1BioID_vs_solubleBioID	0.381725	1.3029	0.0299991	12.7246	2.29303e-06	7.54087	6.90529e-05	FALSE
O70161	18717	Pip5k1c	WASH1BioID_vs_solubleBioID	0.945803	1.92626	0.0745026	12.6949	2.3321e-06	7.54087	6.90529e-05	FALSE
Q60870	13476	Reep5	WASH1BioID_vs_solubleBioID	1.14481	2.21117	0.0917524	12.4772	2.64298e-06	7.54087	7.43556e-05	FALSE
Q8BMG7	98732	Rab3gap2	WASH1BioID_vs_solubleBioID	1.00336	2.00467	0.0809911	12.3885	2.78272e-06	7.54087	7.59647e-05	FALSE
Q0GNC1	70435	Inf2	WASH1BioID_vs_solubleBioID	1.42571	2.68646	0.116631	12.2241	3.06455e-06	7.54087	8.0521e-05	FALSE
Q9JKN6	664883	Nova1	WASH1BioID_vs_solubleBioID	0.788524	1.72731	0.0646305	12.2005	3.10761e-06	7.54087	8.06444e-05	FALSE
Q9Z0P5	23999	Twf2	WASH1BioID_vs_solubleBioID	-0.515698	0.699454	0.0426433	-12.0933	3.31183e-06	7.54087	8.26097e-05	FALSE
Q62167	13205	Ddx3x	WASH1BioID_vs_solubleBioID	1.41664	2.66963	0.117424	12.0643	3.36962e-06	7.54087	8.26097e-05	FALSE
Q7TQH0	233871	Atxn2l	WASH1BioID_vs_solubleBioID	1.84828	3.60071	0.153445	12.0452	3.40828e-06	7.54087	8.26097e-05	FALSE
P0C7L0	330319	Wipf3	WASH1BioID_vs_solubleBioID	1.55156	2.93135	0.129073	12.0208	3.45845e-06	7.54087	8.26097e-05	FALSE
Q811P8	330914	Arhgap32	WASH1BioID_vs_solubleBioID	1.75074	3.3653	0.146929	11.9155	3.68476e-06	7.54087	8.59165e-05	FALSE
A2ARS0	383787	Ankrd63	WASH1BioID_vs_solubleBioID	1.63609	3.10823	0.137335	11.9132	3.69001e-06	7.54087	8.59165e-05	FALSE
Q50H33	243043	Kctd8	WASH1BioID_vs_solubleBioID	1.31078	2.48076	0.110669	11.8442	3.84758e-06	7.54087	8.69636e-05	FALSE
Q3UJB9	234699	Edc4	WASH1BioID_vs_solubleBioID	1.80683	3.49873	0.153099	11.8017	3.94818e-06	7.54087	8.73586e-05	FALSE
Q9D7A8	74252	Armc1	WASH1BioID_vs_solubleBioID	0.599331	1.51501	0.050996	11.7525	4.0687e-06	7.54087	8.90875e-05	FALSE
O70310	18107	Nmt1	WASH1BioID_vs_solubleBioID	1.23767	2.35818	0.107303	11.5344	4.65498e-06	7.54087	9.74652e-05	FALSE
P59481	214895	Lman2l	WASH1BioID_vs_solubleBioID	0.550936	1.46504	0.0478049	11.5247	4.68315e-06	7.54087	9.74652e-05	FALSE
Q93092	21351	Taldo1	WASH1BioID_vs_solubleBioID	0.682157	1.60454	0.0597147	11.4236	4.98869e-06	7.54087	0.000102806	FALSE
P54923	11544	Adprh	WASH1BioID_vs_solubleBioID	1.2403	2.36248	0.113357	10.9415	6.7918e-06	7.54087	0.000133424	FALSE
P80316	12465	Cct5	WASH1BioID_vs_solubleBioID	1.29651	2.45634	0.120407	10.7677	7.61387e-06	7.54087	0.000145979	FALSE
Q9ERG2	94186	Strn3	WASH1BioID_vs_solubleBioID	1.31635	2.49035	0.122877	10.7127	7.89675e-06	7.54087	0.00014954	FALSE
Q5SSM3	216831	Arhgap44	WASH1BioID_vs_solubleBioID	1.03831	2.05382	0.0979194	10.6037	8.49327e-06	7.54087	0.00015799	FALSE
Q9DCT8	68337	Crip2	WASH1BioID_vs_solubleBioID	1.45658	2.74457	0.13789	10.5634	8.72679e-06	7.54087	0.000159323	FALSE
Q6ZPF3	24001	Tiam2	WASH1BioID_vs_solubleBioID	1.32938	2.51295	0.125981	10.5523	8.79234e-06	7.54087	0.000159323	FALSE
O88704	15165	Hcn1	WASH1BioID_vs_solubleBioID	0.665215	1.58581	0.0635305	10.4708	9.29029e-06	7.54087	0.000166908	FALSE
Q9EPW0	269180	Inpp4a	WASH1BioID_vs_solubleBioID	0.82994	1.77761	0.0794166	10.4505	9.41958e-06	7.54087	0.000167245	FALSE
P97379	23881	G3bp2	WASH1BioID_vs_solubleBioID	1.62284	3.0798	0.1583	10.2517	1.07951e-05	7.54087	0.000184482	FALSE
Q61792	16796	Lasp1	WASH1BioID_vs_solubleBioID	1.24323	2.36728	0.122093	10.1826	1.13242e-05	7.54087	0.000191873	FALSE
O35927	18163	Ctnnd2	WASH1BioID_vs_solubleBioID	1.85019	3.60548	0.181895	10.1718	1.14101e-05	7.54087	0.000191873	FALSE
Q3UUG6	224617	Tbc1d24	WASH1BioID_vs_solubleBioID	0.226328	1.16985	0.0223728	10.1162	1.18615e-05	7.54087	0.00019788	FALSE
Q61595	16709	Ktn1	WASH1BioID_vs_solubleBioID	1.65432	3.14774	0.165473	9.99749	1.28942e-05	7.54087	0.000206897	FALSE
P46471	19181	Psmc2	WASH1BioID_vs_solubleBioID	1.62202	3.07805	0.162778	9.96458	1.31981e-05	7.54087	0.000208589	FALSE
P57776	66656	Eef1d	WASH1BioID_vs_solubleBioID	1.31276	2.48417	0.132732	9.89035	1.39135e-05	7.54087	0.000218255	FALSE
P83510	665113	Tnik	WASH1BioID_vs_solubleBioID	1.14765	2.21553	0.116225	9.87442	1.40727e-05	7.54087	0.000219117	FALSE
P12849	19085	Prkar1b	WASH1BioID_vs_solubleBioID	0.355763	1.27966	0.0364424	9.76233	1.52523e-05	7.54087	0.000232671	FALSE
Q3UTJ2	234214	Sorbs2	WASH1BioID_vs_solubleBioID	1.85379	3.61449	0.190257	9.74362	1.54598e-05	7.54087	0.000233788	FALSE
Q6NSW3	77629	Sphkap	WASH1BioID_vs_solubleBioID	1.88621	3.69662	0.195424	9.65189	1.65242e-05	7.54087	0.000245358	FALSE
A2RSJ4	75089	Uhrf1bp1l	WASH1BioID_vs_solubleBioID	0.34435	1.26958	0.0357282	9.63805	1.66918e-05	7.54087	0.000245358	FALSE
Q2M3X8	218194	Phactr1	WASH1BioID_vs_solubleBioID	1.82155	3.53461	0.190768	9.54852	1.78235e-05	7.54087	0.000258379	FALSE
Q8CJH3	235611	Plxnb1	WASH1BioID_vs_solubleBioID	1.0028	2.00389	0.105325	9.52102	1.81881e-05	7.54087	0.000260078	FALSE
Q61205	18476	Pafah1b3	WASH1BioID_vs_solubleBioID	0.829586	1.77718	0.0877243	9.45674	1.90738e-05	7.54087	0.0002709	FALSE
Q6PD28	225849	Ppp2r5b	WASH1BioID_vs_solubleBioID	1.1399	2.20365	0.120851	9.43226	1.94238e-05	7.54087	0.000274019	FALSE
A2A699	217219	Fam171a2	WASH1BioID_vs_solubleBioID	1.94343	3.8462	0.206884	9.3938	1.99881e-05	7.54087	0.000279951	FALSE
P61294	270192	Rab6b	WASH1BioID_vs_solubleBioID	1.04601	2.06481	0.111793	9.35665	2.05508e-05	7.54087	0.000282547	FALSE
P23953	13884	Ces1c	WASH1BioID_vs_solubleBioID	0.699836	1.62432	0.0748034	9.35567	2.0566e-05	7.54087	0.000282547	FALSE
Q8BJH1	67306	Zc2hc1a	WASH1BioID_vs_solubleBioID	1.56611	2.96106	0.167718	9.33777	2.08437e-05	7.54087	0.000283432	FALSE
O88685	19182	Psmc3	WASH1BioID_vs_solubleBioID	0.920288	1.89249	0.0994043	9.25803	2.2133e-05	7.54087	0.000291845	FALSE
Q8VEK0	69981	Tmem30a	WASH1BioID_vs_solubleBioID	0.83122	1.77919	0.0898001	9.25634	2.21612e-05	7.54087	0.000291845	FALSE
Q99KK7	75221	Dpp3	WASH1BioID_vs_solubleBioID	1.22247	2.33345	0.133222	9.17619	2.35501e-05	7.54087	0.00030557	FALSE
Q8R3Q2	71474	Ppp6r2	WASH1BioID_vs_solubleBioID	1.90261	3.73889	0.208117	9.14203	2.41716e-05	7.54087	0.000309579	FALSE
Q9CQS8	66212	Sec61b	WASH1BioID_vs_solubleBioID	0.355002	1.27899	0.038981	9.10707	2.48267e-05	7.54087	0.000309915	FALSE
P62761	26950	Vsnl1	WASH1BioID_vs_solubleBioID	1.47468	2.77921	0.162027	9.10145	2.49339e-05	7.54087	0.000309915	FALSE
P16460	11898	Ass1	WASH1BioID_vs_solubleBioID	0.718384	1.64534	0.0790658	9.0859	2.5233e-05	7.54087	0.000309915	FALSE
P62137	19045	Ppp1ca	WASH1BioID_vs_solubleBioID	1.31892	2.49479	0.145265	9.0794	2.53594e-05	7.54087	0.000309915	FALSE
Q61151	26932	Ppp2r5e	WASH1BioID_vs_solubleBioID	0.861632	1.81709	0.0956448	9.00867	2.67801e-05	7.54087	0.000323515	FALSE
P02089	15130	Hbb-b2	WASH1BioID_vs_solubleBioID	0.814731	1.75897	0.0905171	9.00085	2.69426e-05	7.54087	0.000323619	FALSE
Q91XM9	23859	Dlg2	WASH1BioID_vs_solubleBioID	1.43172	2.69768	0.159494	8.97662	2.74531e-05	7.54087	0.000327877	FALSE
Q9QWI6	56013	Srcin1	WASH1BioID_vs_solubleBioID	1.73593	3.33094	0.19409	8.94393	2.81591e-05	7.54087	0.00033441	FALSE
P58404	97387	Strn4	WASH1BioID_vs_solubleBioID	1.72702	3.31042	0.194011	8.90166	2.91025e-05	7.54087	0.000341751	FALSE
Q9QUR6	19072	Prep	WASH1BioID_vs_solubleBioID	0.528015	1.44194	0.0594123	8.8873	2.94309e-05	7.54087	0.000343688	FALSE
P70175	53310	Dlg3	WASH1BioID_vs_solubleBioID	1.38497	2.61167	0.156672	8.83997	3.05436e-05	7.54087	0.000354711	FALSE
Q9Z0N1	26905	Eif2s3x	WASH1BioID_vs_solubleBioID	0.886791	1.84906	0.100511	8.82284	3.09578e-05	7.54087	0.000356463	FALSE
Q99LD8	51793	Ddah2	WASH1BioID_vs_solubleBioID	0.406323	1.3253	0.0460697	8.81973	3.10336e-05	7.54087	0.000356463	FALSE
Q8BH44	235431	Coro2b	WASH1BioID_vs_solubleBioID	0.497658	1.41192	0.0565307	8.80332	3.14374e-05	7.54087	0.000359138	FALSE
B9EJA2	30785	Cttnbp2	WASH1BioID_vs_solubleBioID	1.98235	3.95136	0.226284	8.76045	3.25204e-05	7.54087	0.000366469	FALSE
P14148	19989	Rpl7	WASH1BioID_vs_solubleBioID	1.12325	2.17837	0.128254	8.75802	3.25832e-05	7.54087	0.000366469	FALSE
Q9D289	78232	Trappc6b	WASH1BioID_vs_solubleBioID	0.792018	1.73149	0.0905	8.75157	3.27499e-05	7.54087	0.000366469	FALSE
Q99LG4	219022	Ttc5	WASH1BioID_vs_solubleBioID	0.778025	1.71478	0.0889796	8.74386	3.29509e-05	7.54087	0.000366469	FALSE
Q9WUP7	56207	Uchl5	WASH1BioID_vs_solubleBioID	1.94747	3.85696	0.224529	8.67355	3.48468e-05	7.54087	0.0003815	FALSE
Q68FF6	216963	Git1	WASH1BioID_vs_solubleBioID	1.13793	2.20065	0.131897	8.62741	3.61572e-05	7.54087	0.000391765	FALSE
Q9QUR7	23988	Pin1	WASH1BioID_vs_solubleBioID	0.880791	1.84138	0.102272	8.61223	3.66004e-05	7.54087	0.000394533	FALSE
Q9JKS5	56541	Habp4	WASH1BioID_vs_solubleBioID	1.66308	3.16693	0.194748	8.53969	3.88042e-05	7.54087	0.000414528	FALSE
Q8K2Q7	71678	Brox	WASH1BioID_vs_solubleBioID	0.601869	1.51768	0.070491	8.53824	3.88497e-05	7.54087	0.000414528	FALSE
Q99PL6	66530	Ubxn6	WASH1BioID_vs_solubleBioID	1.29056	2.44622	0.151487	8.51923	3.94523e-05	7.54087	0.000416807	FALSE
P10649	14862	Gstm1	WASH1BioID_vs_solubleBioID	1.00539	2.00749	0.118025	8.51844	3.94775e-05	7.54087	0.000416807	FALSE
Q01853	269523	Vcp	WASH1BioID_vs_solubleBioID	1.14979	2.21882	0.135895	8.46085	4.13692e-05	7.54087	0.000432233	FALSE
Q61548	20616	Snap91	WASH1BioID_vs_solubleBioID	1.71962	3.2935	0.203417	8.45367	4.16123e-05	7.54087	0.000432233	FALSE
A2AG50	78283	Map7d2	WASH1BioID_vs_solubleBioID	1.4056	2.64928	0.166548	8.43964	4.20916e-05	7.54087	0.000433708	FALSE
Q80VC9	69697	Camsap3	WASH1BioID_vs_solubleBioID	1.48777	2.80456	0.177351	8.38884	4.38793e-05	7.54087	0.000445759	FALSE
Q9QXS1	18810	Plec	WASH1BioID_vs_solubleBioID	1.36521	2.57614	0.162793	8.38618	4.39753e-05	7.54087	0.000445759	FALSE
Q9CY58	66870	Serbp1	WASH1BioID_vs_solubleBioID	1.77571	3.42407	0.212235	8.36673	4.4684e-05	7.54087	0.000449405	FALSE
Q62465	26949	Vat1	WASH1BioID_vs_solubleBioID	0.457536	1.37319	0.054942	8.32763	4.61476e-05	7.54087	0.00045655	FALSE
Q9WUD1	56424	Stub1	WASH1BioID_vs_solubleBioID	1.83072	3.55714	0.219917	8.3246	4.62631e-05	7.54087	0.00045655	FALSE
O55126	14467	Nipsnap2	WASH1BioID_vs_solubleBioID	0.935832	1.91299	0.112729	8.3016	4.71515e-05	7.54087	0.000463143	FALSE
Q8CIE6	12847	Copa	WASH1BioID_vs_solubleBioID	0.564278	1.47865	0.0682047	8.2733	4.82713e-05	7.54087	0.000471936	FALSE
B1AXH1	100042480	Nhsl2	WASH1BioID_vs_solubleBioID	1.73681	3.33297	0.211344	8.21794	5.05481e-05	7.54087	0.000490322	FALSE
Q9CQC6	66882	Bzw1	WASH1BioID_vs_solubleBioID	0.937325	1.91497	0.114143	8.21184	5.08066e-05	7.54087	0.000490322	FALSE
Q91YJ2	69150	Snx4	WASH1BioID_vs_solubleBioID	0.949421	1.9311	0.115696	8.20619	5.10467e-05	7.54087	0.000490322	FALSE
Q8R1B4	56347	Eif3c	WASH1BioID_vs_solubleBioID	1.00837	2.01164	0.122892	8.2053	5.1085e-05	7.54087	0.000490322	FALSE
Q8BG32	69077	Psmd11	WASH1BioID_vs_solubleBioID	0.929373	1.90445	0.114088	8.14608	5.36856e-05	7.54087	0.000512941	FALSE
Q9CWZ7	108123	Napg	WASH1BioID_vs_solubleBioID	1.18109	2.26748	0.145738	8.10419	5.56147e-05	7.54087	0.000523241	FALSE
P15532	18102	Nme1	WASH1BioID_vs_solubleBioID	0.400708	1.32016	0.0494633	8.10112	5.57593e-05	7.54087	0.000523241	FALSE
Q8BKC5	70572	Ipo5	WASH1BioID_vs_solubleBioID	0.689785	1.61304	0.085532	8.06464	5.75076e-05	7.54087	0.000537249	FALSE
P80317	12466	Cct6a	WASH1BioID_vs_solubleBioID	0.947635	1.92871	0.118073	8.02583	5.94351e-05	7.54087	0.00054795	FALSE
P62746	11852	Rhob	WASH1BioID_vs_solubleBioID	0.54731	1.46136	0.0687599	7.95972	6.28876e-05	7.54087	0.000575751	FALSE
Q9CPU0	109801	Glo1	WASH1BioID_vs_solubleBioID	1.83765	3.57427	0.230953	7.95682	6.30445e-05	7.54087	0.000575751	FALSE
Q8K2K6	15463	Agfg1	WASH1BioID_vs_solubleBioID	1.28078	2.4297	0.161051	7.95261	6.32723e-05	7.54087	0.000575751	FALSE
Q9WV69	13829	Dmtn	WASH1BioID_vs_solubleBioID	1.34796	2.54552	0.169875	7.93504	6.42338e-05	7.54087	0.00058198	FALSE
Q9JHU9	71780	Isyna1	WASH1BioID_vs_solubleBioID	1.20918	2.31207	0.152946	7.90595	6.58621e-05	7.54087	0.000594172	FALSE
Q8C3W1	69551	2310022B05Rik	WASH1BioID_vs_solubleBioID	1.51092	2.84992	0.191891	7.87383	6.77135e-05	7.54087	0.000605675	FALSE
Q61735	16423	Cd47	WASH1BioID_vs_solubleBioID	0.986194	1.98095	0.125528	7.85637	6.87443e-05	7.54087	0.000609894	FALSE
P99026	19172	Psmb4	WASH1BioID_vs_solubleBioID	0.64616	1.565	0.0822504	7.85601	6.87654e-05	7.54087	0.000609894	FALSE
[truncated: 1,805 more rows]

## Sheet: Functional Annotations
Identifying Information			Cellular function
[truncated: 77 more rows]

## Sheet: Edges
Interacting Proteins		Supporting Data
[truncated: 442 more rows]
