# Supplementary material for: Genetic disruption of WASHC4 drives endo-lysosomal dysfunction and cognitive-movement impairments in mice and humans
Source: eLife. 2021 Mar 22;10:e61590. doi: 10.7554/eLife.61590 (PMC7984842; doi:10.7554/eLife.61590)
Supplement: Supplementary file 2. — Raw data and protein-level statistical analyses for the spatial proteomics TMT experiment (Figure 3). MSstatsTMT was used to assess two types of contrasts: intra-BioFraction comparisons between Mutant and Control conditions, and overall ‘Mutant-Control’ comparisons. [file elife-61590-supp2.xlsx]

## Sheet: Table of Contents
Supplementary Table 2
Experiment: Spatial Proteomics WT vs. MUT mouse brain, Protein-level differences
Corresponding Figures: 3, 4
Sheet Name	Description
Samples	Sample preparation and metadata
Raw Peptide	Raw peptide data from all three TMT experiments
F4 Results (5,000xg)	Comparisons of normalized protein intensities in each cellular biofraction (F), analyzed across all three TMT experiments
F5 Results (9,000xg)
F6 Results (12,000xg)
F7 Results (15,000xg)
F8 Results (30,000xg)
F9 Results (79,000xg)
F10 Results (120,000xg)
Mutant-Control Results	Comparison of normalized total protein abundance between genotypes, analyzed across all three TMT experiments

## Sheet: Samples
Animal Information					Subcellular Brain Fractionation			TMT 16-plex Proteomics
Mouse ID	Genotype	Age (mo)	DOB	Sex	Date of Brain Fractionation	Subcellular Fraction	Cfg Force (xg)	Proteomics ID	TMT Label ID	Treatment Condition	TMT Experiment	TMT Channel
23733	WT	10	1062019	Female	11062019	F4	5000	Exp1Control4	Abundance.F1.126.Sample.53395.Control4.Exp1	Control	Exp1	126
23733	WT	10	1062019	Female	11062019	F5	9000	Exp1Control5	Abundance.F1.127C.Sample.53396.Control5.Exp1	Control	Exp1	127C
23733	WT	10	1062019	Female	11062019	F6	12000	Exp1Control6	Abundance.F1.128C.Sample.53397.Control6.Exp1	Control	Exp1	128C
23733	WT	10	1062019	Female	11062019	F7	15000	Exp1Control7	Abundance.F1.129C.Sample.53398.Control7.Exp1	Control	Exp1	129C
23733	WT	10	1062019	Female	11062019	F8	30000	Exp1Control8	Abundance.F1.130C.Sample.53399.Control8.Exp1	Control	Exp1	130C
23733	WT	10	1062019	Female	11062019	F9	79000	Exp1Control9	Abundance.F1.131C.Sample.53400.Control9.Exp1	Control	Exp1	131C
23733	WT	10	1062019	Female	11062019	F10	120000	Exp1Control10	Abundance.F1.132C.Sample.53401.Control10.Exp1	Control	Exp1	132C
23731	MUT	10	1062019	Female	11062019	F4	5000	Exp1Mutant4	Abundance.F1.127N.Sample.53402.Mutant4.Exp1	Mutant	Exp1	127N
23731	MUT	10	1062019	Female	11062019	F5	9000	Exp1Mutant5	Abundance.F1.128N.Sample.53403.Mutant5.Exp1	Mutant	Exp1	128N
23731	MUT	10	1062019	Female	11062019	F6	12000	Exp1Mutant6	Abundance.F1.129N.Sample.53404.Mutant6.Exp1	Mutant	Exp1	129N
23731	MUT	10	1062019	Female	11062019	F7	15000	Exp1Mutant7	Abundance.F1.130N.Sample.53405.Mutant7.Exp1	Mutant	Exp1	130N
23731	MUT	10	1062019	Female	11062019	F8	30000	Exp1Mutant8	Abundance.F1.131N.Sample.53406.Mutant8.Exp1	Mutant	Exp1	131N
23731	MUT	10	1062019	Female	11062019	F9	79000	Exp1Mutant9	Abundance.F1.132N.Sample.53407.Mutant9.Exp1	Mutant	Exp1	132N
23731	MUT	10	1062019	Female	11062019	F10	120000	Exp1Mutant10	Abundance.F1.133N.Sample.53408.Mutant10.Exp1	Mutant	Exp1	133N
							NA	Exp1SPQC1	Abundance.F1.133C.Sample.53437.SPQC1.Exp1	SPQC	Exp1	133C
							NA	Exp1SPQC2	Abundance.F1.134N.Sample.53438.SPQC2.Exp1	SPQC	Exp1	134N
23736	WT	10	1062019	Female	11122019	F4	5000	Exp2Control4	Abundance.F2.126.Sample.53409.Control4.Exp2	Control	Exp2	126
23736	WT	10	1062019	Female	11122019	F5	9000	Exp2Control5	Abundance.F2.127C.Sample.53410.Control5.Exp2	Control	Exp2	127C
23736	WT	10	1062019	Female	11122019	F6	12000	Exp2Control6	Abundance.F2.128C.Sample.53411.Control6.Exp2	Control	Exp2	128C
23736	WT	10	1062019	Female	11122019	F7	15000	Exp2Control7	Abundance.F2.129C.Sample.53412.Control7.Exp2	Control	Exp2	129C
23736	WT	10	1062019	Female	11122019	F8	30000	Exp2Control8	Abundance.F2.130C.Sample.53413.Control8.Exp2	Control	Exp2	130C
23736	WT	10	1062019	Female	11122019	F9	79000	Exp2Control9	Abundance.F2.131C.Sample.53414.Control9.Exp2	Control	Exp2	131C
23736	WT	10	1062019	Female	11122019	F10	120000	Exp2Control10	Abundance.F2.132C.Sample.53415.Control10.Exp2	Control	Exp2	132C
24088	MUT	10	1282019	Female	11122019	F4	5000	Exp2Mutant4	Abundance.F2.127N.Sample.53416.Mutant4.Exp2	Mutant	Exp2	127N
24088	MUT	10	1282019	Female	11122019	F5	9000	Exp2Mutant5	Abundance.F2.128N.Sample.53417.Mutant5.Exp2	Mutant	Exp2	128N
24088	MUT	10	1282019	Female	11122019	F6	12000	Exp2Mutant6	Abundance.F2.129N.Sample.53418.Mutant6.Exp2	Mutant	Exp2	129N
24088	MUT	10	1282019	Female	11122019	F7	15000	Exp2Mutant7	Abundance.F2.130N.Sample.53419.Mutant7.Exp2	Mutant	Exp2	130N
24088	MUT	10	1282019	Female	11122019	F8	30000	Exp2Mutant8	Abundance.F2.131N.Sample.53420.Mutant8.Exp2	Mutant	Exp2	131N
24088	MUT	10	1282019	Female	11122019	F9	79000	Exp2Mutant9	Abundance.F2.132N.Sample.53421.Mutant9.Exp2	Mutant	Exp2	132N
24088	MUT	10	1282019	Female	11122019	F10	120000	Exp2Mutant10	Abundance.F2.133N.Sample.53422.Mutant10.Exp2	Mutant	Exp2	133N
							NA	Exp2SPQC3	Abundance.F2.133C.Sample.53439.SPQC3.Exp2	SPQC	Exp2	133C
							NA	Exp2SPQC4	Abundance.F2.134N.Sample.53440.SPQC4.Exp2	SPQC	Exp2	134N
23737	WT	10	1062019	Female	11132019	F4	5000	Exp3Control4	Abundance.F3.126.Sample.53423.Control4.Exp3	Control	Exp3	126
23737	WT	10	1062019	Female	11132019	F5	9000	Exp3Control5	Abundance.F3.127C.Sample.53424.Control5.Exp3	Control	Exp3	127C
23737	WT	10	1062019	Female	11132019	F6	12000	Exp3Control6	Abundance.F3.128C.Sample.53425.Control6.Exp3	Control	Exp3	128C
23737	WT	10	1062019	Female	11132019	F7	15000	Exp3Control7	Abundance.F3.129C.Sample.53426.Control7.Exp3	Control	Exp3	129C
23737	WT	10	1062019	Female	11132019	F8	30000	Exp3Control8	Abundance.F3.130C.Sample.53427.Control8.Exp3	Control	Exp3	130C
23737	WT	10	1062019	Female	11132019	F9	79000	Exp3Control9	Abundance.F3.131C.Sample.53428.Control9.Exp3	Control	Exp3	131C
23737	WT	10	1062019	Female	11132019	F10	120000	Exp3Control10	Abundance.F3.132C.Sample.53429.Control10.Exp3	Control	Exp3	132C
23732	MUT	10	1062019	Female	11132019	F4	5000	Exp3Mutant4	Abundance.F3.127N.Sample.53430.Mutant4.Exp3	Mutant	Exp3	127N
23732	MUT	10	1062019	Female	11132019	F5	9000	Exp3Mutant5	Abundance.F3.128N.Sample.53431.Mutant5.Exp3	Mutant	Exp3	128N
23732	MUT	10	1062019	Female	11132019	F6	12000	Exp3Mutant6	Abundance.F3.129N.Sample.53432.Mutant6.Exp3	Mutant	Exp3	129N
23732	MUT	10	1062019	Female	11132019	F7	15000	Exp3Mutant7	Abundance.F3.130N.Sample.53433.Mutant7.Exp3	Mutant	Exp3	130N
23732	MUT	10	1062019	Female	11132019	F8	30000	Exp3Mutant8	Abundance.F3.131N.Sample.53434.Mutant8.Exp3	Mutant	Exp3	131N
23732	MUT	10	1062019	Female	11132019	F9	79000	Exp3Mutant9	Abundance.F3.132N.Sample.53435.Mutant9.Exp3	Mutant	Exp3	132N
23732	MUT	10	1062019	Female	11132019	F10	120000	Exp3Mutant10	Abundance.F3.133N.Sample.53436.Mutant10.Exp3	Mutant	Exp3	133N
							NA	Exp3SPQC5	Abundance.F3.133C.Sample.53441.SPQC5.Exp3	SPQC	Exp3	133C
							NA	Exp3SPQC6	Abundance.F3.134N.Sample.53442.SPQC6.Exp3	SPQC	Exp3	134N

## Sheet: Raw Peptide
	Identifiying Information		Peptide Information					TMT Experiment 1																TMT Experiment 2																TMT Experiment 3
Confidence	UniProt Accession	Description	Peptide Sequence	Modifications	Retention.Time	Ion.Score	q-Value	Abundance.F1.126.Sample.53395.Control4.Exp1	Abundance.F1.127N.Sample.53402.Mutant4.Exp1	Abundance.F1.127C.Sample.53396.Control5.Exp1	Abundance.F1.128N.Sample.53403.Mutant5.Exp1	Abundance.F1.128C.Sample.53397.Control6.Exp1	Abundance.F1.129N.Sample.53404.Mutant6.Exp1	Abundance.F1.129C.Sample.53398.Control7.Exp1	Abundance.F1.130N.Sample.53405.Mutant7.Exp1	Abundance.F1.130C.Sample.53399.Control8.Exp1	Abundance.F1.131N.Sample.53406.Mutant8.Exp1	Abundance.F1.131C.Sample.53400.Control9.Exp1	Abundance.F1.132N.Sample.53407.Mutant9.Exp1	Abundance.F1.132C.Sample.53401.Control10.Exp1	Abundance.F1.133N.Sample.53408.Mutant10.Exp1	Abundance.F1.133C.Sample.53437.SPQC1.Exp1	Abundance.F1.134N.Sample.53438.SPQC2.Exp1	Abundance.F2.126.Sample.53409.Control4.Exp2	Abundance.F2.127N.Sample.53416.Mutant4.Exp2	Abundance.F2.127C.Sample.53410.Control5.Exp2	Abundance.F2.128N.Sample.53417.Mutant5.Exp2	Abundance.F2.128C.Sample.53411.Control6.Exp2	Abundance.F2.129N.Sample.53418.Mutant6.Exp2	Abundance.F2.129C.Sample.53412.Control7.Exp2	Abundance.F2.130N.Sample.53419.Mutant7.Exp2	Abundance.F2.130C.Sample.53413.Control8.Exp2	Abundance.F2.131N.Sample.53420.Mutant8.Exp2	Abundance.F2.131C.Sample.53414.Control9.Exp2	Abundance.F2.132N.Sample.53421.Mutant9.Exp2	Abundance.F2.132C.Sample.53415.Control10.Exp2	Abundance.F2.133N.Sample.53422.Mutant10.Exp2	Abundance.F2.133C.Sample.53439.SPQC3.Exp2	Abundance.F2.134N.Sample.53440.SPQC4.Exp2	Abundance.F3.126.Sample.53423.Control4.Exp3	Abundance.F3.127N.Sample.53430.Mutant4.Exp3	Abundance.F3.127C.Sample.53424.Control5.Exp3	Abundance.F3.128N.Sample.53431.Mutant5.Exp3	Abundance.F3.128C.Sample.53425.Control6.Exp3	Abundance.F3.129N.Sample.53432.Mutant6.Exp3	Abundance.F3.129C.Sample.53426.Control7.Exp3	Abundance.F3.130N.Sample.53433.Mutant7.Exp3	Abundance.F3.130C.Sample.53427.Control8.Exp3	Abundance.F3.131N.Sample.53434.Mutant8.Exp3
High	A1L317	Keratin, type I cytoskeletal 24 OS=Mus musculus OX=10090 GN=Krt24 PE=2 SV=2	QTMQDLNDR	1xOxidation [M3]; 1xTMTpro [N-Term]	16.9444	12	0.005908																																	8	9.4	7.5	13.9	16.3	22.7	16.2	28.3	20.7	35.9
High	A2A432	Cullin-4B OS=Mus musculus OX=10090 GN=Cul4b PE=1 SV=1	AQIHQFREDSLDSVLFLK	1xTMTpro [K18]; 1xTMTpro [N-Term]	76.8566	7	8.838e-06	71.6	74.8	95.9	128.9	112.8	130.1	95.5	121	77	92.2	108.3	118.3	158.4	224.3	108.1	120.3
High	A2A432	Cullin-4B OS=Mus musculus OX=10090 GN=Cul4b PE=1 SV=1	DIMIQFK	1xTMTpro [K7]; 1xTMTpro [N-Term]	70.6208	30	0.001344	36.2	42.5	35.9	44.7	59.9	50.8	30.3	54.9	30	40.1	62.4	68.9	116.9	166.2	59.4	67.9	31.5	40.7	32.9	37	34.8	40.1	36.1	37.9	35.4	36.5	41.6	47.1	88.8	99.1	51.4	60.1	57.6	63.6	52	51.3	72.1	51.1	51.9	59.3	50	54
High	A2A432	Cullin-4B OS=Mus musculus OX=10090 GN=Cul4b PE=1 SV=1	DVFEAFYK	1xTMTpro [K8]; 1xTMTpro [N-Term]	78.7033	34	0.0001094	254	284.6	286.3	337.7	348.6	379.2	246.8	363.9	214.4	269.2	408.1	407.9	661.4	838.3	368.4	406.1	256.1	292.8	289.6	297.3	320.4	323.8	326.1	337.8	261.7	253.8	307.6	340.7	603.4	558.7	375.1	381	308.7	319.3	308	302.9	339.8	279.6	260.9	314	252.4	255.7
High	A2A432	Cullin-4B OS=Mus musculus OX=10090 GN=Cul4b PE=1 SV=1	ERNGEAIDR	1xDeamidated [N3]; 1xTMTpro [N-Term]	19.4973	18	0.0005082																																	21.9	26.1	28.2	30	26	27.3	28	26.8	25.7	21.4
High	A2A432	Cullin-4B OS=Mus musculus OX=10090 GN=Cul4b PE=1 SV=1	ETVEEQASTTER	1xTMTpro [N-Term]	26.3898	55	8.838e-06	31.5	36.2	43.6	51.1	48.4	46	41.6	44.3	32.3	40.5	49.2	55.8	81.2	109.4	48.9	57.1	36.9	39.1	40.5	39.1	41.7	51.1	51.9	44.5	40.1	29.5	50.1	53.9	83.1	88.5	51.4	57.3	62.2	55	69	58	64.2	58.6	65.3	65	57	65
High	A2A432	Cullin-4B OS=Mus musculus OX=10090 GN=Cul4b PE=1 SV=1	EVPEYLHHVNK	1xTMTpro [K11]; 1xTMTpro [N-Term]	44.5242	32	2.218e-05	19.7	23	28.2	31.7	43.5	37.2	24.5	41.3	16.4	20.6	25.9	36.8	50.8	69.9	39	33.2	113.2	110.9	115	128.5	115.2	171.2	162.8	158.4	133	109	141.2	137.4	230.3	243.5	158.5	157.6	37.4	41.2	38.7	45.1	45.1	40.7	48.2	61.4	45.6	38.5
High	A2A432	Cullin-4B OS=Mus musculus OX=10090 GN=Cul4b PE=1 SV=1	GKDIEDGDKFICNDDFK	1xCarbamidomethyl [C12]; 3xTMTpro [K2; K9; K17]; 1xTMTpro [N-Term]	61.0025	22	0.0001568																																	114.7	113.7	122.4	137.9	136.8	137.2	132.3	171.3	130.8	144.1
High	A2A432	Cullin-4B OS=Mus musculus OX=10090 GN=Cul4b PE=1 SV=1	GLNSLLDENR	1xTMTpro [N-Term]	58.6829	42	8.838e-06	55	19	101.8	33.8	125.9	39.6	106.6	28.7	91.5	25.6	88.7	38.1	133.7	55.5	64.6	74	156.7	187.7	152	183.8	150.1	169.4	154.7	155.2	138.3	132.7	163.2	186.5	251.5	268.7	202.8	197.1
High	A2A432	Cullin-4B OS=Mus musculus OX=10090 GN=Cul4b PE=1 SV=1	INQIQMK	1xTMTpro [K7]; 1xTMTpro [N-Term]	52.9455	27	0.0006252	244.7	258.7	287.2	340.8	317.1	385	250.5	360.5	231.7	277.6	385.4	373.1	544.9	737.8	347.6	372.5	237.7	300.8	265.7	293.7	278.9	324.1	304	311.3	250.4	253	288.7	330.5	478.4	501.9	327.8	330.6	202.5	161.6	160.6	182.4	198.4	165	159.8	208.5	153	143.4
High	A2A432	Cullin-4B OS=Mus musculus OX=10090 GN=Cul4b PE=1 SV=1	LEEEADR	1xTMTpro [N-Term]	28.8491	36	0.0006027	308.2	309.1	287.9	338.2	295.9	343.7	277.5	323.1	250.4	311.8	462.3	447.4	770.3	939.8	437.6	449	211.3	246.2	218.7	248.9	236.2	272.2	225.5	207.5	228.9	218.2	271.2	299.4	457.2	497.9	283.6	287	241.3	204.2	209.6	212.5	240.3	196	168.4	198.6	190.7	174
High	A2A432	Cullin-4B OS=Mus musculus OX=10090 GN=Cul4b PE=1 SV=1	LEEEADRLITYLDQTTQK	1xTMTpro [K18]; 1xTMTpro [N-Term]	96.5719	19	2.785e-05	65.4	94.6	92.3	112.9	92.5	101.2	73.6	72.9	62.6	66.3	65.4	73	68.9	69.1	80.6	81	63.6	73.5	68.5	71.7	59	72.4	73.8	71.8	65.8	54.4	69.7	85	124.8	114	86.5	86.3	112.2	132.7	95.5	104.3	114.3	84	94.4	106.6	91.9	97.5
High	A2A432	Cullin-4B OS=Mus musculus OX=10090 GN=Cul4b PE=1 SV=1	LITYLDQTTQK	1xTMTpro [K11]; 1xTMTpro [N-Term]	73.2166	39	0.0006133																																	169.7	162.3	156.6	156.1	192.8	158	148.6	190.2	155.6	135.1
High	A2A432	Cullin-4B OS=Mus musculus OX=10090 GN=Cul4b PE=1 SV=1	LKHECGAAFTSK	1xCarbamidomethyl [C5]; 2xTMTpro [K2; K12]; 1xTMTpro [N-Term]	37.8355	5	2.785e-05	32.3	41.1	46.8	56.4	55.1	69.2	44.7	65.6	53.6	59.4	106.5	129.6	128.5	200.3	86.2	85.1	53.3	54.8	59.3	59.7	60.6	76.5	79.9	75.8	91.4	65.6	124	127.8	164.6	170.7	108.7	104.9
High	A2A432	Cullin-4B OS=Mus musculus OX=10090 GN=Cul4b PE=1 SV=1	LPENYTDETWQK	1xTMTpro [K12]; 1xTMTpro [N-Term]	62.1965	42	8.838e-06	126	150.5	162.4	214.1	213.9	237.1	190.7	223	169.6	214.8	200.6	208.4	251.4	348.6	217.7	224.1																	287.8	276.6	241.1	264.1	264.8	251.4	230.4	290.7	259.8	255.9
High	A2A432	Cullin-4B OS=Mus musculus OX=10090 GN=Cul4b PE=1 SV=1	LYAAEGQK	1xTMTpro [K8]; 1xTMTpro [N-Term]	45.411	30	0.0001612	244.9	299.7	330.7	402	397	442	314.3	406.8	246.5	280.3	369.4	401.6	612	813.1	410.3	400.5
High	A2A432	Cullin-4B OS=Mus musculus OX=10090 GN=Cul4b PE=1 SV=1	NGEAIDR	1xTMTpro [N-Term]	20.4746	11	0.001885	35.2	35.9	38.8	63.9	53.1	58.6	46.5	55.4	39.5	44.1	59.7	58.9	79.1	107.5	53.7	55.5	60.1	60.2	60.6	73.7	61.8	83.4	64.3	75.1	61.3	38.1	60	60.4	94.1	107.2	66.5	63.7
High	A2A432	Cullin-4B OS=Mus musculus OX=10090 GN=Cul4b PE=1 SV=1	QICEDHIK	1xCarbamidomethyl [C3]; 1xTMTpro [K8]; 1xTMTpro [N-Term]	37.8884	41	8.838e-06	172.4	181.7	202	230.4	251.2	259.8	201.3	242.8	177.6	170.9	232.2	254.5	437.1	531.6	257.3	262.4	203.5	216.3	211.3	225.2	223.5	251.6	271.2	259.6	221.1	175.1	210.1	221.3	447.7	371.2	283.1	280.3	246.2	234.7	208.3	203.3	255.5	201.3	219.8	236.3	180.5	189.6
High	A2A432	Cullin-4B OS=Mus musculus OX=10090 GN=Cul4b PE=1 SV=1	QYQIDAAIVR	1xTMTpro [N-Term]	54.7988	32	8.838e-06																	121.5	124.1	138.8	145.1	138.5	151.7	142.8	157.1	146.8	108.7	140.6	164	251.1	263.9	163.5	174.1	184.8	179.8	165.3	179.3	193.7	171.2	182.5	198.2	179.4	164.1
High	A2A432	Cullin-4B OS=Mus musculus OX=10090 GN=Cul4b PE=1 SV=1	RIESLIDR	1xTMTpro [N-Term]	46.9655	25	9.049e-05	23.9	26.5	21.1	27.9	26.6	25.7	19.1	25.6	19	22.4	28.1	33	54.8	71.3	34.5	37.5																	23.3	17.8	23.3	24.3	30.7	27.1	17.7	27.4	23	23.5
High	A2A432	Cullin-4B OS=Mus musculus OX=10090 GN=Cul4b PE=1 SV=1	RIESLIDRDYMER	1xTMTpro [N-Term]	54.4275	18	7.513e-05	62.3	60.8	67	77.5	88.5	96.1	69.6	90.2	57.3	67.1	102.3	84.2	151.4	192.5	95.6	99.4	104.8	136.3	111.6	132.3	133.8	140.5	140.1	144.5	98.8	105.1	135.7	147.4	232.2	269.2	144.3	163.2	181.1	157.6	168	171.8	199.9	168.5	160.1	198	147.6	157.2
High	A2A432	Cullin-4B OS=Mus musculus OX=10090 GN=Cul4b PE=1 SV=1	RLEEEADR	1xTMTpro [N-Term]	23.001	26	0.002092	12.8	11.4	13	16.8	21	15.8	8.9	19.1	14.2	14.9	17.5	20.9	33.2	46.6	21.5	22.3																	19.4	13.2	17.8	14.1	19.7	18.2	10.4	22.3	12.9	13.1
High	A2A432	Cullin-4B OS=Mus musculus OX=10090 GN=Cul4b PE=1 SV=1	RLEEEADRLITYLDQTTQK	1xTMTpro [K19]; 1xTMTpro [N-Term]	87.3664	13	8.838e-06																																	45.4	51.6	44.8	45.8	46.5	44.8	49.2	54.9	45.6	47.9
High	A2A432	Cullin-4B OS=Mus musculus OX=10090 GN=Cul4b PE=1 SV=1	RPNKPAELIAK	2xTMTpro [K4; K11]; 1xTMTpro [N-Term]	43.1288	10	0.0006133																																	93.5	85.2	92.3	89.1	91.7	93.2	89.7	102.9	89.6	87.8
High	A2A432	Cullin-4B OS=Mus musculus OX=10090 GN=Cul4b PE=1 SV=1	SASVDAEK	1xTMTpro [K8]; 1xTMTpro [N-Term]	33.5032	43	2.785e-05	326.8	350.9	411.1	490.1	469.6	584.9	402.1	525.1	327	342.8	504.6	556.4	837.1	1125.9	497.8	506.7	536.2	546.1	566.7	612.4	603.8	775.4	753.8	754.6	594.5	495.1	654.6	689.4	1295.1	1357.9	769.8	800.7	239.7	237.6	220.8	235	242.7	221	231.4	294.6	223.5	229.8
High	A2A432	Cullin-4B OS=Mus musculus OX=10090 GN=Cul4b PE=1 SV=1	SLIASVEK	1xTMTpro [K8]; 1xTMTpro [N-Term]	60.0151	24	0.0002864	174.2	183.3	201.8	254.5	244.2	303.8	218.5	293	168.2	227.1	291.3	304	423.5	625	268.3	283.4	188.9	227.7	197.3	233.4	208.1	267.6	259.4	246.2	199.1	174.6	183.5	204.2	369.3	377.2	253.8	270.8	280.7	280.4	266.3	279.8	337.8	289.1	295.2	379.6	317.1	307.8
High	A2A432	Cullin-4B OS=Mus musculus OX=10090 GN=Cul4b PE=1 SV=1	SSTAVSSFANSKPGSAK	2xTMTpro [K12; K17]; 1xTMTpro [N-Term]	46.354	26	8.838e-06	58	61.1	78.3	104.1	98.6	110.7	88.2	108.4	66.8	73.8	106.2	109.4	168.3	217.3	109.9	107.1	44.1	46.9	50.6	60.9	58.5	74.7	71.6	80.6	58.3	42.6	71.9	64.6	105.9	109	73	75.2	61.3	63.9	58.2	64.1	70.1	67.1	72.8	94.8	62.1	58.6
High	A2A432	Cullin-4B OS=Mus musculus OX=10090 GN=Cul4b PE=1 SV=1	TIDGILLLIER	1xTMTpro [N-Term]	98.0785	43	8.838e-06	94.7	97.5	116.7	122.6	138.1	161.9	112.2	147.4	88.1	103.1	147.7	149.7	264.4	339.6	143.7	154.2	166.3	178.8	192.2	207.2	178.1	215.4	244.8	236.7	181.7	157.7	212.2	230	452.6	427.1	260.2	259.4	296.1	274.8	253.9	279.2	307.8	274	269.3	329.6	240.4	258.6
High	A2A432	Cullin-4B OS=Mus musculus OX=10090 GN=Cul4b PE=1 SV=1	TLQSLACGK	1xCarbamidomethyl [C7]; 1xTMTpro [K9]; 1xTMTpro [N-Term]	52.5233	32	2.785e-05	133.8	156.7	158.5	210	189.8	219.8	152.3	200.2	129	126.7	188.2	189	330.6	427.8	196.6	197.2	122.6	119.1	127.2	129.8	108.6	159.2	135.2	148.8	126.2	90.3	153.6	132.8	257.3	260.7	165.9	150	114.4	103.9	100.7	104.7	114.6	89.6	98.7	119.2	94.5	82
High	A2A432	Cullin-4B OS=Mus musculus OX=10090 GN=Cul4b PE=1 SV=1	YNLEELYQAVENLCSHK	1xCarbamidomethyl [C14]; 1xTMTpro [K17]; 1xTMTpro [N-Term]	96.4059	71	8.838e-06																	91.4	101	101.9	107.4	92.6	124.7	111.7	110.1	94.1	87.4	87.7	104.3	150.3	176.9	106.7	131.1	137.3	124.3	122.5	118.5	117.4	111.7	114.2	118.6	97.1	112.5
High	A2A4P0	ATP-dependent RNA helicase DHX8 OS=Mus musculus OX=10090 GN=Dhx8 PE=2 SV=1	ESLPIYK	1xTMTpro [K7]; 1xTMTpro [N-Term]	58.8878	27	0.0009455																																	25.8	36.7	31	41.7	41	38.1	50.2	58.7	75.6	67.9
High	A2A4P0	ATP-dependent RNA helicase DHX8 OS=Mus musculus OX=10090 GN=Dhx8 PE=2 SV=1	FSQYFYEAPIFTIPGR	1xTMTpro [N-Term]	96.9487	50	8.838e-06																	49.8	67.9	65.6	69.7	50.6	66.9	58.9	57.3	60.6	52.6	66.6	70.3	68.1	75.5	69.6	74.4
High	A2A4P0	ATP-dependent RNA helicase DHX8 OS=Mus musculus OX=10090 GN=Dhx8 PE=2 SV=1	IGCTQPR	1xCarbamidomethyl [C3]; 1xTMTpro [N-Term]	28.5298	16	0.0006953																	40.4	50	50.1	49.4	52.5	68	68.6	70.1	104	82.8	145.1	142.9	146.7	167.3	93	95.8
High	A2A4P0	ATP-dependent RNA helicase DHX8 OS=Mus musculus OX=10090 GN=Dhx8 PE=2 SV=1	LEYLSLVSK	1xTMTpro [K9]; 1xTMTpro [N-Term]	81.0353	20	0.0002864	10.6	8.7	12.7	18.9	18.8	14.9	14.1	20.5	24.1	24	45.3	44.7	40.9	58.5	28.9	32
High	A2A559	Post-GPI attachment to proteins factor 3 OS=Mus musculus OX=10090 GN=Pgap3 PE=2 SV=1	FLEDDSLYLLK	1xTMTpro [K11]; 1xTMTpro [N-Term]	92.6456	38	1.703e-05	46.8	59.5	68.7	83.2	94.6	102.2	90	100.6	115.3	137.7	108.6	104.5	47.6	62.9	94.7	89.2
High	A2A5R2	Brefeldin A-inhibited guanine nucleotide-exchange protein 2 OS=Mus musculus OX=10090 GN=Arfgef2 PE=1 SV=1	ACQVALDEIKAELEK	1xCarbamidomethyl [C2]; 2xTMTpro [K10; K15]; 1xTMTpro [N-Term]	83.4478	55	8.838e-06	153.2	172.4	182.1	205.1	184.7	201.6	157.8	170.3	151.3	155.5	278.9	256.9	297.6	326	217.1	226.5	194	209.9	193.5	198.1	193.7	201.5	223.2	211	190.3	192.6	239.6	268.3	325.7	269.1	242.6	227.8	284.7	223	215.3	226.5	251	181.6	204.5	214.4	231.3	178.2
High	A2A5R2	Brefeldin A-inhibited guanine nucleotide-exchange protein 2 OS=Mus musculus OX=10090 GN=Arfgef2 PE=1 SV=1	AFNSNYEQR	1xTMTpro [N-Term]	34.128	19	3.33e-05	67.2	68.5	76.7	92.9	76.1	98.6	64.5	79.7	64.3	76.9	116.7	118	123.7	146.7	92	102.6	57.3	70.2	63.7	67	60.8	77.1	60.2	66.3	68.7	69.7	71.9	103	99.4	110.4	75.6	72.1
High	A2A5R2	Brefeldin A-inhibited guanine nucleotide-exchange protein 2 OS=Mus musculus OX=10090 GN=Arfgef2 PE=1 SV=1	ALMEAVSHAK	1xTMTpro [K10]; 1xTMTpro [N-Term]	56.3141	50	8.838e-06	131.6	146	177.7	200.7	157.8	209.2	154	163.7	154	155.3	257.9	276.2	293.7	374.5	205.1	219.3	134.6	166.9	151.8	182.7	161.1	199	171.9	184	172.4	179.3	231	267.4	278.3	299.6	189	198.3	247.4	244.8	207.6	213.7	230.2	201.1	198.7	222.3	244.7	204.8
High	A2A5R2	Brefeldin A-inhibited guanine nucleotide-exchange protein 2 OS=Mus musculus OX=10090 GN=Arfgef2 PE=1 SV=1	CLSEFACNAAFPDTSMEAIR	2xCarbamidomethyl [C1; C7]; 1xTMTpro [N-Term]	76.8739	68	8.838e-06																	60.3	69.8	68	64.3	61.1	91.3	75.9	81.9	79.2	58.5	82.8	89.8	88.8	106.1	76.2	74.4	85.7	100.4	90.3	95	104.3	86.3	97.8	104.1	96.4	85.3
High	A2A5R2	Brefeldin A-inhibited guanine nucleotide-exchange protein 2 OS=Mus musculus OX=10090 GN=Arfgef2 PE=1 SV=1	DAFLVFR	1xTMTpro [N-Term]	72.8125	3	0.001624	82	94.6	98	114.6	105.9	105.7	88.9	99.6	82.9	90.8	115.8	130.6	138.1	187.8	108.3	105.9	225.7	261.6	242.1	250.9	219.7	287.3	249.6	268.9	234.4	230.2	285.7	334	372	406.1	286	321.3	242.6	212.3	200.5	189.5	199.9	179	190.6	213.6	182.6	184.8
High	A2A5R2	Brefeldin A-inhibited guanine nucleotide-exchange protein 2 OS=Mus musculus OX=10090 GN=Arfgef2 PE=1 SV=1	DAYVQALAR	1xTMTpro [N-Term]	49.7307	27	6.573e-05	239	248.5	240.1	293.5	257.9	303.2	218.2	260.3	206.6	239.2	379	401.2	435.6	580.4	320.9	308.7	508.1	621.3	511.8	585.6	484.1	616.8	515.4	574.7	552.3	536.1	742.7	828.2	878.7	1007.5	661.1	664.4	471.4	457.3	394.7	399.7	413.8	365.4	372.1	403.6	412.2	384.3
High	A2A5R2	Brefeldin A-inhibited guanine nucleotide-exchange protein 2 OS=Mus musculus OX=10090 GN=Arfgef2 PE=1 SV=1	DFLRPFEHIMK	1xTMTpro [K11]; 1xTMTpro [N-Term]	74.9694	4	0.0005228	70.9	78.3	76.9	95.8	92.8	99.6	71.3	93.2	65.5	72.4	108	111.2	135	172.2	110	109.4	243.5	302.4	258.9	288.4	258.3	324.9	283.9	326.7	260.1	271.6	316.6	385.3	434	512.1	341.4	356	366.7	378	347.3	331.3	349.5	298.8	314.1	342.5	335.6	309.4
High	A2A5R2	Brefeldin A-inhibited guanine nucleotide-exchange protein 2 OS=Mus musculus OX=10090 GN=Arfgef2 PE=1 SV=1	DLYVNPNHQATLGQER	1xTMTpro [N-Term]	43.9332	69	8.838e-06	101.5	110.3	105.3	128.1	119.5	144	108.1	122.5	99.4	120.9	177.5	179.9	212	245.6	153.2	155.2	107	136.5	124.9	155.9	129.1	156.9	128.7	151	133	160.3	169.9	199.2	203.9	228.2	149.7	148.5	166.5	151.7	151.9	152.4	169	137	146	161.7	153.9	172.9
High	A2A5R2	Brefeldin A-inhibited guanine nucleotide-exchange protein 2 OS=Mus musculus OX=10090 GN=Arfgef2 PE=1 SV=1	EHTIATK	1xTMTpro [K7]; 1xTMTpro [N-Term]	29.7502	31	0.0001645	79.8	94.3	83.5	110.6	100.1	115.6	87	107.8	69.6	84.5	118.8	129.4	137.6	199	105.7	109.6	116.8	131.5	128.4	149.3	139.8	190.7	163.4	186.1	142.7	145.3	169.3	195.6	232.9	258.4	169.4	166	179.5	169.2	153.3	166.2	160.7	150.2	148	165.6	184.3	143.9
High	A2A5R2	Brefeldin A-inhibited guanine nucleotide-exchange protein 2 OS=Mus musculus OX=10090 GN=Arfgef2 PE=1 SV=1	EIIEHGIELFNK	1xTMTpro [K12]; 1xTMTpro [N-Term]	76.734	53	8.838e-06	162.5	166.6	189.2	230.5	205.2	225.3	164.6	198.3	160.2	178.3	250.6	225.6	295.7	369.7	221.9	236.9																	204	167.1	160.6	173	169.3	140.5	135	161	150.9	139.3
High	A2A5R2	Brefeldin A-inhibited guanine nucleotide-exchange protein 2 OS=Mus musculus OX=10090 GN=Arfgef2 PE=1 SV=1	FLEKGELANFR	1xTMTpro [K4]; 1xTMTpro [N-Term]	64.0137	2	0.001205																																	270.1	309.8	249.8	234.9	240.9	260.7	325.6	314.4	267.8	251
High	A2A5R2	Brefeldin A-inhibited guanine nucleotide-exchange protein 2 OS=Mus musculus OX=10090 GN=Arfgef2 PE=1 SV=1	FSHILQK	1xTMTpro [K7]; 1xTMTpro [N-Term]	54.7919	33	0.0001436	31.1	37.6	42.5	53.5	43	51.6	35.9	45.9	33.8	33.5	57.1	59.2	69.3	81.7	54	51
High	A2A5R2	Brefeldin A-inhibited guanine nucleotide-exchange protein 2 OS=Mus musculus OX=10090 GN=Arfgef2 PE=1 SV=1	FSHILQKDAFLVFR	1xTMTpro [K7]; 1xTMTpro [N-Term]	84.718	11	3.33e-05	8.9	13.9	17.2	18.1	13.6	17.1	13.4	7.6	10.1	12.4	20.5	30	22	25.2	18.9	16.2
High	A2A5R2	Brefeldin A-inhibited guanine nucleotide-exchange protein 2 OS=Mus musculus OX=10090 GN=Arfgef2 PE=1 SV=1	FSLLTASSSITEMK	1xTMTpro [K14]; 1xTMTpro [N-Term]	87.4517	31	8.838e-06																	164.2	201.8	159.6	206.9	167.8	202.4	170.4	202	198.5	209.1	249.2	284.1	287	324.1	218.2	232.1	199.5	187.1	158.9	182.6	173.4	160.4	173.2	188	186.9	166.1
High	A2A5R2	Brefeldin A-inhibited guanine nucleotide-exchange protein 2 OS=Mus musculus OX=10090 GN=Arfgef2 PE=1 SV=1	GINDSKDLPEEYLSSIYDEIEGKK	3xTMTpro [K6; K23; K24]; 1xTMTpro [N-Term]	96.7869	27	8.838e-06																																	80	90.4	79.3	66.4	81.4	68.4	82.5	103.9	85.5	90.9
High	A2A5R2	Brefeldin A-inhibited guanine nucleotide-exchange protein 2 OS=Mus musculus OX=10090 GN=Arfgef2 PE=1 SV=1	GINDSKDLPEEYLSSIYDEIEGKK	1xDeamidated [N3]; 3xTMTpro [K6; K23; K24]; 1xTMTpro [N-Term]	97.2625	23	0.0007854	66	71.5	90.9	111.4	109	123.6	80.7	94.1	81.2	74.7	110.4	128.7	107.3	161.6	100	103.7
High	A2A5R2	Brefeldin A-inhibited guanine nucleotide-exchange protein 2 OS=Mus musculus OX=10090 GN=Arfgef2 PE=1 SV=1	GLECLVSILK	1xCarbamidomethyl [C4]; 1xTMTpro [K10]; 1xTMTpro [N-Term]	97.1145	21	5.039e-05	56.9	57.3	58.5	68.4	69.4	77.2	55.7	81.6	56.1	72.3	134	128.3	150.6	194.3	91.3	98.9	67.7	74.5	66.8	84.4	74.4	91.8	89	90.5	79	89.6	124.4	136.2	153	168.6	110.6	104	88.1	79.7	85.6	90.8	91.7	78.9	75.1	95.4	86.4	85
High	A2A5R2	Brefeldin A-inhibited guanine nucleotide-exchange protein 2 OS=Mus musculus OX=10090 GN=Arfgef2 PE=1 SV=1	GSPVSGR	1xTMTpro [N-Term]	20.5181	7	0.003502																																	309.4	246.7	253.5	220.2	211.4	175.6	180.3	169.4	206.8	166.7
High	A2A5R2	Brefeldin A-inhibited guanine nucleotide-exchange protein 2 OS=Mus musculus OX=10090 GN=Arfgef2 PE=1 SV=1	HGLPEPDR	1xTMTpro [N-Term]	27.1814	42	0.0001645	92.6	99.7	100.9	125.2	98.8	104.9	80.3	97.5	69.7	79.1	118.6	126.5	123.8	170.1	117.4	124.6	181.9	189.5	189	195.4	213.1	229.1	233.7	227.4	187.6	183	153.5	157.4	145.2	164.8	195.2	217	183.7	164.8	137.9	155.5	149.9	123.1	109.4	144.9	135	119.7
High	A2A5R2	Brefeldin A-inhibited guanine nucleotide-exchange protein 2 OS=Mus musculus OX=10090 GN=Arfgef2 PE=1 SV=1	IACIFGMQLER	1xCarbamidomethyl [C3]; 1xTMTpro [N-Term]	85.3238	54	8.838e-06	27	36.8	35.8	46.2	40.3	48.2	41.4	49.8	39.9	43.4	73.1	71.1	70.9	92.1	50.6	53.7	38.7	47.4	45.1	47.2	41	51.8	48.3	51.2	51.6	47.3	54.4	67.5	68.2	78.9	58.3	60	34.7	31.3	31.9	34.6	36	27.6	37.7	39.7	40.9	35.6
High	A2A5R2	Brefeldin A-inhibited guanine nucleotide-exchange protein 2 OS=Mus musculus OX=10090 GN=Arfgef2 PE=1 SV=1	IFTGSTR	1xTMTpro [N-Term]	43.8378	18	0.001488	47	52.9	58.7	58	55	58.8	35.6	53.8	41.4	43.8	56.7	49	56.3	81.6	51.4	53.7																	124.1	115.5	106.5	119.4	113.6	89.7	88.8	98.7	103.8	78.4
High	A2A5R2	Brefeldin A-inhibited guanine nucleotide-exchange protein 2 OS=Mus musculus OX=10090 GN=Arfgef2 PE=1 SV=1	IVEISYYNMNR	1xTMTpro [N-Term]	65.8931	54	8.838e-06	59.5	67.1	71.2	85.7	77.9	85.7	55.1	71.6	65.8	72.3	93.3	89.4	95.2	124.8	69.8	96.3																	75.4	87.9	63.4	69	67.7	48.4	63.8	64.7	63.7	67.5
High	A2A5R2	Brefeldin A-inhibited guanine nucleotide-exchange protein 2 OS=Mus musculus OX=10090 GN=Arfgef2 PE=1 SV=1	IVETICNCFQGPQTDEGVQLQIIK	2xCarbamidomethyl [C6; C8]; 1xTMTpro [K24]; 1xTMTpro [N-Term]	89.2293	56	8.838e-06	9.7	10.5	12.9	15.6	15.7	13.8	9	11.8	13.2	11.9	17.7	18.2	16.3	20.4	16	14.7	98.5	112.2	105.8	122.5	101.2	119.6	105.6	100.7	99.3	101.1	114.5	137	136.8	143.2	115.4	123.1	128.2	109.3	102.2	109.6	108.4	78.3	96.1	90.5	101.6	88.6
High	A2A5R2	Brefeldin A-inhibited guanine nucleotide-exchange protein 2 OS=Mus musculus OX=10090 GN=Arfgef2 PE=1 SV=1	IWHVIGDHFNK	1xTMTpro [K11]; 1xTMTpro [N-Term]	66.9243	30	8.838e-06	81.2	98.8	95.2	113.7	83.1	109.3	70.1	95.5	82.6	106	142.7	171	182.8	234.9	123.5	138.7	466.4	614.4	416.2	461.9	305.3	379.6	291.6	317.1	294	330.2	352.1	438.8	445.8	497	418.9	440.7	155.7	149.4	106.4	116.3	122.5	99.6	104.6	125.8	115.9	121.9
High	A2A5R2	Brefeldin A-inhibited guanine nucleotide-exchange protein 2 OS=Mus musculus OX=10090 GN=Arfgef2 PE=1 SV=1	IWIPEEPSQVPAALSSTW	1xTMTpro [N-Term]	97.9849	14	0.002761																	35.2	43.5	31.4	34.7	29.8	33.9	33.9	37.4	33.5	30	27.5	31.2	30.1	26.7	33.6	36.9
High	A2A5R2	Brefeldin A-inhibited guanine nucleotide-exchange protein 2 OS=Mus musculus OX=10090 GN=Arfgef2 PE=1 SV=1	KKGLECLVSILK	1xCarbamidomethyl [C6]; 3xTMTpro [K1; K2; K12]; 1xTMTpro [N-Term]	86.061	3	0.0002271																	73.8	76.5	81.5	88.4	67.8	117.4	87.9	116.7	92.5	65.6	104.3	110.4	84.7	134.6	88.9	114.4
High	A2A5R2	Brefeldin A-inhibited guanine nucleotide-exchange protein 2 OS=Mus musculus OX=10090 GN=Arfgef2 PE=1 SV=1	LDGNAIVDFVR	1xTMTpro [N-Term]	76.6933	41	8.838e-06	205	212.7	236	273.3	230.5	260.4	184.3	235.3	198.2	206.8	304.6	315.2	354.5	436.2	235.2	270.9	46.3	50.4	53.9	39.6	33.2	47.7	42.5	40.9	41.9	35.5	34.8	50.1	47.9	55	42.9	44.1	89.5	84.1	62.1	65.7	66.3	56.3	54.6	67.4	68.2	58.1
High	A2A5R2	Brefeldin A-inhibited guanine nucleotide-exchange protein 2 OS=Mus musculus OX=10090 GN=Arfgef2 PE=1 SV=1	LDSTQVGEFLGDSTR	1xTMTpro [N-Term]	68.5914	46	8.838e-06	92	104.5	104.3	128.6	118.7	128.4	89	110.8	77.1	100.4	110.1	102.5	128.4	173.7	134.7	128.8	53.9	61	63	70.7	60.4	77.7	64.9	65.2	58.5	62.9	69.7	80.9	94.1	109.4	72.5	74.7	182.4	158.7	147	155.3	148.8	125.9	128.7	131.8	149.2	137.8
High	A2A5R2	Brefeldin A-inhibited guanine nucleotide-exchange protein 2 OS=Mus musculus OX=10090 GN=Arfgef2 PE=1 SV=1	LGAAAPPK	1xTMTpro [K8]; 1xTMTpro [N-Term]	47.11	39	0.0003641	498.8	538.1	505.7	611.6	443.2	522.1	388.6	427.5	378.8	404.6	538.4	575.3	563.5	764.3	537.3	537.6	499.5	627.7	430	411.4	307.8	378.7	305.7	312.3	307.4	277	340.1	435.4	430.9	481.6	391.1	406.5	227.7	193.3	185.6	209.1	205.3	198	195.7	237.8	230.1	232
High	A2A5R2	Brefeldin A-inhibited guanine nucleotide-exchange protein 2 OS=Mus musculus OX=10090 GN=Arfgef2 PE=1 SV=1	LLASLLIK	1xTMTpro [K8]; 1xTMTpro [N-Term]	97.7367	24	6.573e-05	35.3	38.8	39.2	53.4	54.4	61.6	41.6	56.3	43.6	50.1	77.7	86.2	93.1	120.7	56.4	73.7	31.6	34.3	32	30	30.6	32.5	26.1	40.9	34.5	30.9	45.2	47.2	63.3	56.4	39.9	44.2	133	136.6	108.3	131.7	124.9	104.3	113.8	129.4	120.4	111.1
High	A2A5R2	Brefeldin A-inhibited guanine nucleotide-exchange protein 2 OS=Mus musculus OX=10090 GN=Arfgef2 PE=1 SV=1	LLDCLQESHSFSK	1xCarbamidomethyl [C4]; 1xTMTpro [K13]; 1xTMTpro [N-Term]	67.3442	42	8.838e-06	82.3	89.1	102.1	134.7	95	116.6	80	110.4	86.4	101.5	140.9	157.5	152.2	197.8	117	114.5																	154	164.2	146.2	144.2	142.7	131.4	139.8	134.3	149.7	146.3
High	A2A5R2	Brefeldin A-inhibited guanine nucleotide-exchange protein 2 OS=Mus musculus OX=10090 GN=Arfgef2 PE=1 SV=1	LLYNVEMEQMAK	1xTMTpro [K12]; 1xTMTpro [N-Term]	77.686	46	8.838e-06	190.7	200.8	220.5	266.5	228	263.7	202.9	213.6	213.7	232.4	331.4	336.2	344.3	436	280.6	288.9
High	A2A5R2	Brefeldin A-inhibited guanine nucleotide-exchange protein 2 OS=Mus musculus OX=10090 GN=Arfgef2 PE=1 SV=1	LPDQEMGDGK	1xTMTpro [K10]; 1xTMTpro [N-Term]	48.7483	25	0.0001094	159.4	169.2	179.3	207.7	176	204.6	147.1	172.2	142.6	168.8	210.4	232	216.9	298.1	193.5	208.1
High	A2A5R2	Brefeldin A-inhibited guanine nucleotide-exchange protein 2 OS=Mus musculus OX=10090 GN=Arfgef2 PE=1 SV=1	LPGEAQK	1xTMTpro [K7]; 1xTMTpro [N-Term]	43.474	12	0.003691																																	207.7	217.7	186.9	206.3	210.5	178.8	168.4	201.6	177.7	183.4
High	A2A5R2	Brefeldin A-inhibited guanine nucleotide-exchange protein 2 OS=Mus musculus OX=10090 GN=Arfgef2 PE=1 SV=1	LSMKPLGEGPPDPK	2xTMTpro [K4; K14]; 1xTMTpro [N-Term]	59.9586	14	0.0004937																																	250.3	244.7	214.8	222.2	232.7	197.7	194.3	228.1	219.5	214.1
High	A2A5R2	Brefeldin A-inhibited guanine nucleotide-exchange protein 2 OS=Mus musculus OX=10090 GN=Arfgef2 PE=1 SV=1	MENQVLQEAR	1xTMTpro [N-Term]	43.0901	45	8.838e-06	107.1	116.2	129.2	153.6	125.1	137.6	107.2	117.8	126.8	133.4	241.3	231.7	220	282.1	147	155.6	89.1	91.9	89.1	99.9	76.8	106.5	98.8	103.8	99.8	93.5	149.7	174.8	166.3	187.7	118.1	115.9	115.4	93.9	93.5	97.3	98.8	79	98.6	97.7	104.4	102.3
High	A2A5R2	Brefeldin A-inhibited guanine nucleotide-exchange protein 2 OS=Mus musculus OX=10090 GN=Arfgef2 PE=1 SV=1	MQIEVFFK	1xTMTpro [K8]; 1xTMTpro [N-Term]	86.4089	31	8.042e-05																	30.3	35.5	26.5	35	27.9	32.8	24.5	29.5	29	29	48.1	56.3	72.4	87.5	39.3	47.2	31.7	38.7	26.6	25.3	28.4	19.3	21.4	23.3	23.3	21
High	A2A5R2	Brefeldin A-inhibited guanine nucleotide-exchange protein 2 OS=Mus musculus OX=10090 GN=Arfgef2 PE=1 SV=1	MYVDENRR	1xTMTpro [N-Term]	29.114	7	0.001747																	170.6	195.2	169.6	192.5	181.4	230.2	181.5	219.5	198.7	196.8	263	298	296.3	334.1	227.5	227
High	A2A5R2	Brefeldin A-inhibited guanine nucleotide-exchange protein 2 OS=Mus musculus OX=10090 GN=Arfgef2 PE=1 SV=1	NLINQTTAK	1xTMTpro [K9]; 1xTMTpro [N-Term]	47.5551	49	8.838e-06	120.5	128.5	133.5	184.5	156.5	179.3	134.1	162.1	131.6	140.8	249.2	247.2	267.8	335.9	180.5	184.3	89.1	104.2	102.9	121.9	98.9	113.4	101.9	121.2	102.2	102.3	138.5	142	179.5	187	119.5	123.7	215.2	193.4	171.2	210.4	186.6	187	173.3	217.2	200.8	196.4
High	A2A5R2	Brefeldin A-inhibited guanine nucleotide-exchange protein 2 OS=Mus musculus OX=10090 GN=Arfgef2 PE=1 SV=1	NRSPTIR	1xTMTpro [N-Term]	19.2447	26	0.002286																	58.3	56.7	82.1	58.9	55.9	69.1	67.1	64.1	68.3	29.9	56.8	60.7	72.7	91.9	54.3	62.3	85.6	71.4	73.2	58.6	89.3	53.1	99.5	68.9	86.7	44.8
High	A2A5R2	Brefeldin A-inhibited guanine nucleotide-exchange protein 2 OS=Mus musculus OX=10090 GN=Arfgef2 PE=1 SV=1	QETSSLACCLR	2xCarbamidomethyl [C8; C9]; 1xTMTpro [N-Term]	43.0008	44	8.838e-06	116	112.9	109.4	151.2	120.3	142.7	103.4	128.7	126.2	127.5	183	193.2	203.2	264	147.5	149.3	147.6	206.4	139.2	195.4	158.5	200.9	155.5	187.9	170.6	169.2	201.4	222.2	224.4	269.2	185.4	180.7
High	A2A5R2	Brefeldin A-inhibited guanine nucleotide-exchange protein 2 OS=Mus musculus OX=10090 GN=Arfgef2 PE=1 SV=1	QSLSSIDR	1xTMTpro [N-Term]	34.6462	30	0.0002504	272.9	276.5	267.1	360.5	292.8	351.7	265.8	334.2	261.3	344.5	408.2	425.4	450.7	625.6	383.4	362.5
High	A2A5R2	Brefeldin A-inhibited guanine nucleotide-exchange protein 2 OS=Mus musculus OX=10090 GN=Arfgef2 PE=1 SV=1	QSVASEK	1xTMTpro [K7]; 1xTMTpro [N-Term]	29.7753	26	0.0002504	145.9	164.6	177.1	210.6	206.3	216.4	184.2	212.1	174.1	185.9	292	281.3	359.2	449.7	244.2	253.6	49.6	60.5	58.2	65.4	58.4	86.6	79	73.9	77.7	66.6	92.7	111.2	115.9	121	88.3	85	395.1	351.3	355.1	354.2	428	347	379.4	429.3	521.3	479.4
High	A2A5R2	Brefeldin A-inhibited guanine nucleotide-exchange protein 2 OS=Mus musculus OX=10090 GN=Arfgef2 PE=1 SV=1	QYLCVALSK	1xCarbamidomethyl [C4]; 1xTMTpro [K9]; 1xTMTpro [N-Term]	65.7075	23	0.0001568																																	100	87.5	90.8	98.7	91.4	82.2	81.6	93.4	100.2	92
High	A2A5R2	Brefeldin A-inhibited guanine nucleotide-exchange protein 2 OS=Mus musculus OX=10090 GN=Arfgef2 PE=1 SV=1	RACQVALDEIKAELEK	1xCarbamidomethyl [C3]; 2xTMTpro [K11; K16]; 1xTMTpro [N-Term]	74.4604	2	8.838e-06																																	202.4	178.5	169.8	178.7	168.4	114.6	161.5	152.6	197.6	139.7
High	A2A5R2	Brefeldin A-inhibited guanine nucleotide-exchange protein 2 OS=Mus musculus OX=10090 GN=Arfgef2 PE=1 SV=1	RPQHSQLR	1xTMTpro [N-Term]	15.8001	32	0.0001194	39.3	36.1	49	44.2	38.6	43.6	30.9	41.6	30.5	35.1	57	50.6	63.5	91.6	45.4	49.2	103.5	123.2	118.3	128.5	112.1	151.1	121.1	132.8	103.4	121.9	147.4	193	183.4	215	145.4	141	122.1	122.4	107.6	109.7	115.9	77.8	95.6	97.9	106.8	92.7
High	A2A5R2	Brefeldin A-inhibited guanine nucleotide-exchange protein 2 OS=Mus musculus OX=10090 GN=Arfgef2 PE=1 SV=1	TCYNIYLASK	1xCarbamidomethyl [C2]; 1xTMTpro [K10]; 1xTMTpro [N-Term]	59.1925	39	2.218e-05	172.7	178.8	186	230.1	200.7	223.6	152.7	180.9	170.7	165.2	289.1	256.8	300.2	373.4	216.5	222.9	222.8	222	252	236.3	235.1	261.6	263.9	247.9	261.3	207.5	335.9	329.1	395.6	313.8	289	296	276	226.5	217.6	251.8	243.9	180.8	220.4	223.5	248.8	207.5
High	A2A5R2	Brefeldin A-inhibited guanine nucleotide-exchange protein 2 OS=Mus musculus OX=10090 GN=Arfgef2 PE=1 SV=1	TFLEGFRLPGEAQK	1xTMTpro [K14]; 1xTMTpro [N-Term]	76.959	15	6.035e-05	49	61.4	67.3	102	62.4	85.9	68.3	57.6	73.1	49	78.6	86.5	77.9	110.6	65	84.2	52.7	43.8	67.1	51.6	38	76.1	52	54.1	67.2	53.9	83.2	91.5	84.3	86.5	62.8	70.5
High	A2A5R2	Brefeldin A-inhibited guanine nucleotide-exchange protein 2 OS=Mus musculus OX=10090 GN=Arfgef2 PE=1 SV=1	TTIPHVLLTWRPAGMEEEVSDR	1xTMTpro [N-Term]	72.7119	31	8.838e-06	55.1	61.8	58.9	78.8	67.1	72.1	59.2	64	74.5	66.3	88.6	73.4	66.4	93.4	74.8	82.6	75.3	50.9	62	54.2	40.1	53.3	35.6	45.7	49	35.8	40.4	43.9	45.5	47.7	46.6	59.1	86.7	91.4	68	72.4	75.3	63.4	64	81.6	75.2	64.1
High	A2A5R2	Brefeldin A-inhibited guanine nucleotide-exchange protein 2 OS=Mus musculus OX=10090 GN=Arfgef2 PE=1 SV=1	VLQEYTSDDMNVAPGDR	1xTMTpro [N-Term]	58.5921	91	8.838e-06	79.5	84.5	97.1	120.3	97.2	121.6	86.8	109.7	102.1	105.8	161.9	164	141.6	194.1	122.4	127.4																	111.3	106.1	102.2	112.8	110.8	102	95.7	116.1	123	127.1
High	A2A5R2	Brefeldin A-inhibited guanine nucleotide-exchange protein 2 OS=Mus musculus OX=10090 GN=Arfgef2 PE=1 SV=1	WMVIQTLTR	1xTMTpro [N-Term]	81.4802	27	6.035e-05	94.9	99.9	92.6	103	88.2	106.6	64.3	87.8	65.3	84.8	144.2	146.2	159.9	216.1	107.1	106.8	170	211.7	157.6	184	165.2	177.7	136.5	176	163	173.6	227	276.2	285.2	342.3	210.5	215.4	240.2	236.3	181.5	189.2	196.8	162.1	172.5	176.3	186.8	163.6
High	A2A5R2	Brefeldin A-inhibited guanine nucleotide-exchange protein 2 OS=Mus musculus OX=10090 GN=Arfgef2 PE=1 SV=1	YVSERPR	1xTMTpro [N-Term]	23.4339	9	0.001756	401	442.6	489.5	564.1	481.8	556.5	408.7	460.8	411.7	455.6	629.7	687.4	762.8	913.1	535.5	569.6	282.7	313.1	302.8	317.5	270.3	378.7	316.9	380.5	342.3	342.7	394.9	495.4	499.8	573.2	370.7	383.7
High	A2A5Z6	E3 ubiquitin-protein ligase SMURF2 OS=Mus musculus OX=10090 GN=Smurf2 PE=1 SV=1	AVEFFDEER	1xTMTpro [N-Term]	58.1691	10	0.001002																	194.4	216.7	182.6	181.5	142.4	175.4	146.6	151.9	142.8	128.5	159.1	174.6	197.1	191.8	172.1	186.2
High	A2A5Z6	E3 ubiquitin-protein ligase SMURF2 OS=Mus musculus OX=10090 GN=Smurf2 PE=1 SV=1	LLSNAINR	1xTMTpro [N-Term]	52.0671	1	0.001031	27.1	24.2	27	34.7	36.5	34.8	21	33.8	22.6	30.2	41.7	47.5	51.6	50.3	30.1	36.4
High	A2A5Z6	E3 ubiquitin-protein ligase SMURF2 OS=Mus musculus OX=10090 GN=Smurf2 PE=1 SV=1	VYFVDHNNR	1xTMTpro [N-Term]	41.0542	24	3.865e-05																	203.1	255.1	144.9	135.2	74.1	83	60.1	69	68.4	51.9	83.8	77.4	88.7	103.6	109.2	110.7	93.2	93.2	62.8	66.6	59.5	60.2	52.1	51.5	52.6	42.4
High	A2A690	Protein TANC2 OS=Mus musculus OX=10090 GN=Tanc2 PE=1 SV=1	ASPPAESMSVYR	1xTMTpro [N-Term]	43.8899	23	3.865e-05																	68.9	76	67.9	84.4	74.9	77.1	61.4	58.2	76	72.9	156.1	178.5	161.8	177.9	95.9	106.1
High	A2A690	Protein TANC2 OS=Mus musculus OX=10090 GN=Tanc2 PE=1 SV=1	EGFGEDLK	1xTMTpro [K8]; 1xTMTpro [N-Term]	52.5257	18	0.0002864	104.7	128.2	133.4	157.6	110	127.9	90.9	104.9	97.1	106.5	279.5	267	251.6	287.4	154.7	165.4	259.3	321.4	281.1	301.5	291.5	318.4	309.3	289.7	282.5	306.3	522.7	627.8	540.3	545.6	413.2	410.4	241.2	222.9	207.2	215.1	179.6	183.3	155.1	162.6	173.6	197
High	A2A690	Protein TANC2 OS=Mus musculus OX=10090 GN=Tanc2 PE=1 SV=1	EGLTALSWACLK	1xCarbamidomethyl [C10]; 1xTMTpro [K12]; 1xTMTpro [N-Term]	84.5779	29	2.218e-05																																	72.5	79.1	73.4	78.7	70.1	61.6	52.1	69.3	73.6	64.4
High	A2A690	Protein TANC2 OS=Mus musculus OX=10090 GN=Tanc2 PE=1 SV=1	ELGSGGNLKPWQSQK	2xTMTpro [K9; K15]; 1xTMTpro [N-Term]	54.2654	29	8.838e-06	264.4	283.6	302.3	385.1	322.3	361	244.6	322.3	231.3	264.1	714.4	603	721.9	804.9	439.4	450	197.3	231.3	192.4	228	247.9	226.6	228.2	206.6	212.2	214	403.4	461.5	466	502.2	326.4	339.2	288.9	266.8	264.3	276.1	266.1	239.6	212.2	276.2	265.3	257.7
High	A2A690	Protein TANC2 OS=Mus musculus OX=10090 GN=Tanc2 PE=1 SV=1	EWLIWREEGEK	1xTMTpro [K11]; 1xTMTpro [N-Term]	68.9033	1	0.0005504	258.5	279.8	295.7	366.1	250.6	303.4	204	232.7	231.4	226.6	557.1	514.4	529.4	543.1	363.7	370.3
High	A2A690	Protein TANC2 OS=Mus musculus OX=10090 GN=Tanc2 PE=1 SV=1	FLIQCDWTMAGQQQGVFK	1xCarbamidomethyl [C5]; 1xTMTpro [K18]; 1xTMTpro [N-Term]	90.0403	53	8.838e-06	11.3	10.7	11.9	10.3	7.7	12	4.7	9.3	11.5	7.9	28.5	23.6	27.4	32	16.4	14.3	14.7	19.9	19.2	18.3	17.7	16.9	13.9	11.5	16.8	15	34.8	38.3	42.8	41.8	24.8	28.8	19.1	28.1	19.6	18.9	23.5	15.8	17.5	18.9	18.1	18.2
High	A2A690	Protein TANC2 OS=Mus musculus OX=10090 GN=Tanc2 PE=1 SV=1	FPTQSSFDR	1xTMTpro [N-Term]	50.0029	7	0.0008535	331.1	366.7	348.5	456.4	316.3	368.2	226.1	293	229.8	278.5	490.3	499.8	459.7	567.9	386.3	389.5	38.5	41	29.6	44.9	25.5	43.6	33.5	34.9	36	38.2	53.6	47.8	60.4	64.6	39.7	55.2	552.1	556.5	458	512.8	450.1	392.6	367.4	405.7	375.8	398.5
High	A2A690	Protein TANC2 OS=Mus musculus OX=10090 GN=Tanc2 PE=1 SV=1	GAVPLFSTVR	1xTMTpro [N-Term]	61.4719	20	0.0004173	10.9	13.8	12.5	14.9	8.2	15	10.1	9.7	10.8	10	30.7	23.9	28.1	22.8	13.3	17.6
High	A2A690	Protein TANC2 OS=Mus musculus OX=10090 GN=Tanc2 PE=1 SV=1	GVLEPLENLHK	1xTMTpro [K11]; 1xTMTpro [N-Term]	67.1619	36	8.838e-06	159.5	157.5	175.7	204.7	156.2	180	124.6	150.8	140.9	136.2	370.8	307.6	388.7	398.7	224.9	234.1	150.9	168.3	150.5	176.1	154.9	175.1	143.4	138.2	154.7	153.7	239.1	265.4	273	303	194.9	204.1	148.7	126.5	115.6	132.1	108	115.8	84	93.9	115.4	119.3
High	A2A690	Protein TANC2 OS=Mus musculus OX=10090 GN=Tanc2 PE=1 SV=1	GVLEPLENLHKER	1xTMTpro [K11]; 1xTMTpro [N-Term]	58.5775	10	2.785e-05	73.5	76.9	87.4	110.4	72.7	90.9	60.1	72.7	69	58.3	118.7	122.7	111.9	135.9	84.7	90	132.8	120.1	140.4	102.6	90.1	137.8	114.4	134.5	134.2	99.6	241.4	263.9	267.2	264.6	166	190.6	312	314.3	196	197.2	144.6	117.5	149.9	153.1	157.6	152.3
High	A2A690	Protein TANC2 OS=Mus musculus OX=10090 GN=Tanc2 PE=1 SV=1	IFLDRLEENEAIDQDLQAYILHR	1xTMTpro [N-Term]	91.399	32	8.838e-06	63.1	88.3	82.9	111.1	66.1	87.2	61.8	62.5	61.8	67.8	131.4	137.9	149.6	144.8	98	103.3	111.4	142.9	112.9	123	115.4	133	114.1	105.1	109.6	93.1	169	177.5	175.3	203.8	132.6	136.2	102.5	98.2	80.5	97	88.6	80.5	67.5	93.5	87.6	98.9
High	A2A690	Protein TANC2 OS=Mus musculus OX=10090 GN=Tanc2 PE=1 SV=1	LGFLLGEK	1xTMTpro [K8]; 1xTMTpro [N-Term]	85.3722	27	9.049e-05	90.7	90.4	93.9	110.8	91.7	88.5	70.7	83.7	80.8	92.2	229.2	167.5	237.2	227.7	132.4	148.6	46.2	55.8	49.7	56.5	50.8	52.9	54.6	43.5	50.2	50.2	93.3	114.7	98.6	114.7	66.1	64.5	76.9	60.6	63.7	73.9	63.5	63.4	52.8	61.4	68.3	64.4
High	A2A690	Protein TANC2 OS=Mus musculus OX=10090 GN=Tanc2 PE=1 SV=1	LLILGGANINYR	1xTMTpro [N-Term]	80.0247	71	8.838e-06	24.3	28.2	24.4	27.5	21.1	26.8	20.8	21	18.6	19.1	47.6	45.7	42.3	52.2	27.6	23.6	30.7	41.2	31.1	32.3	24.6	31.9	25	35.7	26.9	27.7	43.6	52.9	41	47.5	44.1	34.5
High	A2A690	Protein TANC2 OS=Mus musculus OX=10090 GN=Tanc2 PE=1 SV=1	LLLEQGAAVAQPNR	1xTMTpro [N-Term]	61.6435	60	8.838e-06	64.4	82	80.4	94.6	71.8	79.4	62.3	69.6	61	70	110.9	97.3	102.8	128.4	85.9	89.8	72.7	77.8	80.5	86.9	76.7	97.9	78.5	89	83.8	79.8	121.7	125.2	118.7	131.6	93.2	99.4	71.7	74.9	67.8	65.3	72.7	56.9	56.9	66.6	64	67.3
High	A2A690	Protein TANC2 OS=Mus musculus OX=10090 GN=Tanc2 PE=1 SV=1	LLLEQGAAVAQPNRR	1xTMTpro [N-Term]	54.7464	26	8.838e-06	136.5	145.6	167.1	189.9	125.6	156.3	106.1	123.2	127.7	121	341.5	342	314.8	339.5	193.1	214.4	373.2	357.5	390.3	330.1	296.5	360.3	299.4	303.4	354.9	315.1	729.9	809.4	765.6	774.6	472.7	514.3	568.2	561	438.1	468	372.1	353.4	339.8	370.8	404.2	403
High	A2A690	Protein TANC2 OS=Mus musculus OX=10090 GN=Tanc2 PE=1 SV=1	LMEEGDMFYK	1xTMTpro [K10]; 1xTMTpro [N-Term]	73.2878	47	2.785e-05																																	149.8	160.9	126.4	149.8	131.3	116	115.6	129.2	142.6	135.9
High	A2A690	Protein TANC2 OS=Mus musculus OX=10090 GN=Tanc2 PE=1 SV=1	LTFDLIEK	1xTMTpro [K8]; 1xTMTpro [N-Term]	81.2824	27	0.0001436																																	220.4	254.9	197.8	219.2	201.7	172.4	178.7	207	189.2	190.2
High	A2A690	Protein TANC2 OS=Mus musculus OX=10090 GN=Tanc2 PE=1 SV=1	MDNTTFGK	1xTMTpro [K8]; 1xTMTpro [N-Term]	48.3724	23	0.001158																	149.6	161.1	138.9	144.2	116.9	139	112.5	118.3	123.4	118.4	197.3	235.8	210.6	225.3	153.1	161
High	A2A690	Protein TANC2 OS=Mus musculus OX=10090 GN=Tanc2 PE=1 SV=1	MENLSMFLIK	1xTMTpro [K10]; 1xTMTpro [N-Term]	93.5343	39	8.838e-06	13.7	21.5	19.5	20.7	17.6	19.6	15.8	17.6	16.3	17.9	38.1	34	38.4	45.3	23.3	27.3	77.9	79.8	68.7	84	78	77.4	71.5	69	73.5	61	129.6	153.8	161.2	172.2	110.8	102.3	82.7	75.2	64	57.4	54	53.7	45.6	56.4	54.3	56.2
High	A2A690	Protein TANC2 OS=Mus musculus OX=10090 GN=Tanc2 PE=1 SV=1	MIGNFPSWLK	1xTMTpro [K10]; 1xTMTpro [N-Term]	88.9246	31	6.035e-05	36.7	39.2	44.4	42.1	30.1	43.1	28.8	27.1	31	35.3	97	92.1	93.4	122.1	57.5	57.7	36.5	40.2	40	45.7	34.9	37	31.6	35.5	36.3	37.9	82.4	87.8	92.6	98.2	64.9	62.8	118	116.6	93.2	110.9	103.2	82.5	74.7	92.7	98.3	88.6
High	A2A690	Protein TANC2 OS=Mus musculus OX=10090 GN=Tanc2 PE=1 SV=1	MLLTGGK	1xTMTpro [K7]; 1xTMTpro [N-Term]	58.9782	21	0.001333	630.9	704.7	794.7	963.7	697.8	844.8	548.3	702.2	557.8	626.3	319	349.7	203.3	223.5	694.2	690.3	843.2	1346.7	939.4	1418.9	850.6	1510.1	852.8	1325.7	932.7	1214.6	1070.2	1398.6	985.5	1077.1	1025.4	1055	596.7	633.9	498.5	609.9	550.7	488.3	512.3	526	486.4	449
High	A2A690	Protein TANC2 OS=Mus musculus OX=10090 GN=Tanc2 PE=1 SV=1	MNDFGMAEEFATK	1xTMTpro [K13]; 1xTMTpro [N-Term]	75.3515	31	8.838e-06	131.2	157.4	160.9	196.4	145.6	182.8	134	140.3	128.8	138.1	284.9	287.8	287	338.2	215.5	223.3																	184.4	189.6	163.3	151.1	163.9	133.9	147.1	179.2	169.6	160.1
High	A2A690	Protein TANC2 OS=Mus musculus OX=10090 GN=Tanc2 PE=1 SV=1	NGQCALVHAALR	1xCarbamidomethyl [C4]; 1xDeamidated [N1]; 1xTMTpro [N-Term]	46.5456	38	8.838e-06																																	119	110.7	84.8	98.5	92.8	68.3	76.4	94.2	84.1	80.5
High	A2A690	Protein TANC2 OS=Mus musculus OX=10090 GN=Tanc2 PE=1 SV=1	NGQCALVHAALR	1xCarbamidomethyl [C4]; 1xTMTpro [N-Term]	40.9391	57	8.838e-06																	32	36.8	33.5	41.7	35.6	44.3	35.6	35.2	34.6	26.2	42.4	58.2	48.6	47.7	43.6	44	72.5	79.4	65.4	80.3	79.8	57.6	52.6	72.2	65	53.6
High	A2A690	Protein TANC2 OS=Mus musculus OX=10090 GN=Tanc2 PE=1 SV=1	NLYTPNIK	1xTMTpro [K8]; 1xTMTpro [N-Term]	54.5626	33	0.0006133	83.2	96	97.6	121.3	88.3	107.4	74.3	90.7	81.8	88.6	189.5	168.2	181.9	210.2	127.9	123.1	130.7	127.3	122.6	134.1	98.3	117.7	96.7	98	108.4	110.5	216.7	230.6	225.4	261.2	155.1	148.9	238.3	233.4	192.7	238.9	187.9	176.3	154.8	186.2	196.2	186.5
High	A2A690	Protein TANC2 OS=Mus musculus OX=10090 GN=Tanc2 PE=1 SV=1	NTSVVVTLLK	1xTMTpro [K10]; 1xTMTpro [N-Term]	74.2081	42	8.838e-06	47.9	60.5	59	77.6	54.8	66.7	53.1	61.8	62.6	63.9	128.7	121.8	147.8	168.9	85.5	86.2	50.4	46.1	48.1	72.2	46.7	63.9	50.1	54.8	55.2	45.5	104.8	100.3	101.1	126.4	71.5	70.4	191.1	160.8	141	166.3	141.2	122.9	125.6	142.8	153.9	137.3
High	A2A690	Protein TANC2 OS=Mus musculus OX=10090 GN=Tanc2 PE=1 SV=1	QFAAALEDLKEAIK	2xTMTpro [K10; K14]; 1xTMTpro [N-Term]	97.1702	28	2.218e-05	18.4	23.4	25.5	26.6	20.5	19.4	13	19.3	13.5	16.7	33	29.3	25.5	27.6	20.7	18.4
High	A2A690	Protein TANC2 OS=Mus musculus OX=10090 GN=Tanc2 PE=1 SV=1	QGHWQIVDLLLTHGADVNMADKQGR	1xTMTpro [K22]; 1xTMTpro [N-Term]	79.4937	30	8.838e-06																	57.5	44.2	86.6	61.1	37.7	76.1	58.5	66.2	77.2	40.2	148.7	141.4	119.8	137.1	79.4	81.3	49.7	57.9	40.2	36.5	36.3	27.4	36.1	36	41.5	36.7
High	A2A690	Protein TANC2 OS=Mus musculus OX=10090 GN=Tanc2 PE=1 SV=1	QQTIELGHHILK	1xTMTpro [K12]; 1xTMTpro [N-Term]	50.1786	14	7.115e-05	148.2	152	138.7	172.2	129.5	161.7	98.3	125.2	110.3	107.8	298.2	262.3	269.4	332.9	184.6	173.6																	175.9	152.8	146.1	141.5	132.7	110.7	106.8	113.3	141.3	119.7
High	A2A690	Protein TANC2 OS=Mus musculus OX=10090 GN=Tanc2 PE=1 SV=1	QSSVDSR	1xTMTpro [N-Term]	16.254	25	0.001753	14.2	13.7	13.6	18.7	17.1	11.1	11.7	11.1	11.5	9.7	28	22	26.1	27.5	20.2	17.8	30.8	27.9	30.3	38.6	34.4	33.6	30	35.4	27.1	28.2	51.1	52.1	59.8	62.4	38.3	40.6	59.7	52.4	47	36.5	42.1	34.9	31.4	35.4	37.7	38.6
High	A2A690	Protein TANC2 OS=Mus musculus OX=10090 GN=Tanc2 PE=1 SV=1	RQEEAMR	1xOxidation [M6]; 1xTMTpro [N-Term]	12.8417	12	0.003487																	30.8	33	32.7	31.4	27.6	22.4	22.4	25.1	24.8	19.2	48.7	57.9	54.5	54	36.4	38.2	15.5	16	11.8	13.8	13.1	9.4	10.6	10.3	11.6	11.1
High	A2A690	Protein TANC2 OS=Mus musculus OX=10090 GN=Tanc2 PE=1 SV=1	RQSSVDSR	1xTMTpro [N-Term]	13.4452	32	0.0007854	25.6	34.2	33.8	41.1	24.3	30	18.7	21.8	22.3	20.6	68.5	56.5	65.5	66.9	39.4	37.7	24.8	22.6	29.8	27.4	22.8	25.2	21.8	22.5	20.8	18.8	41.9	48.1	46.9	47.9	31.7	30	39.7	34.4	29.4	32	28.1	24	23.1	27.9	35.8	29.7
High	A2A690	Protein TANC2 OS=Mus musculus OX=10090 GN=Tanc2 PE=1 SV=1	RRQEEAMR	1xTMTpro [N-Term]	13.2054	17	0.001391	46.9	59.9	64.4	81.8	54.9	60.5	44.4	46.4	52.2	53.3	143.5	149.4	142.7	163.5	89.8	85.4	35.8	34.3	37	34.7	30	37.8	29.4	25.7	28.2	25.5	75.6	92.4	70.2	79.8	41.4	48.3	97	86.4	72.2	64.9	60.9	54.1	59.7	57.8	73.5	60.5
High	A2A690	Protein TANC2 OS=Mus musculus OX=10090 GN=Tanc2 PE=1 SV=1	SCDELSPVSPTQGGYPSEPTR	1xCarbamidomethyl [C2]; 1xTMTpro [N-Term]	48.5152	82	8.838e-06	45.6	56.6	61.2	78.6	62.9	63.7	49.5	64.1	69.4	67.6	128	133.6	107.3	138.5	74	88.3	38.6	40.7	44.2	46.9	38	52.5	43.9	42.8	41.4	42.4	82.4	97.2	83.9	83.7	54.6	51.4	59.2	60.8	55	52.6	48	46	46.6	64.6	62.2	63.5
High	A2A690	Protein TANC2 OS=Mus musculus OX=10090 GN=Tanc2 PE=1 SV=1	SCVQDPMASFR	1xCarbamidomethyl [C2]; 1xTMTpro [N-Term]	53.5456	30	8.838e-06																	52.5	53	57.3	55.2	43.2	60.7	42.6	48.3	54.4	51.2	97.3	99.7	93.1	109	70.7	66	63	63.6	53.6	63.5	64.1	56.3	48.2	57.2	62.1	62.4
High	A2A690	Protein TANC2 OS=Mus musculus OX=10090 GN=Tanc2 PE=1 SV=1	SCVQDPMASFRR	1xCarbamidomethyl [C2]; 1xTMTpro [N-Term]	46.5593	18	2.785e-05																																	114.8	143.7	85.9	74.3	82.6	69	85.2	77.6	86.3	92.9
High	A2A690	Protein TANC2 OS=Mus musculus OX=10090 GN=Tanc2 PE=1 SV=1	SLVDNGAATDHADKNGR	1xDeamidated [N15]; 1xTMTpro [K14]; 1xTMTpro [N-Term]	34.0188	28	8.838e-06	44.6	52.3	48.7	71.2	50.5	56.8	37.7	40.3	41.5	45.6	121.1	102.8	128.8	140.1	72.5	82.5
High	A2A690	Protein TANC2 OS=Mus musculus OX=10090 GN=Tanc2 PE=1 SV=1	SLVDNGAATDHADKNGR	1xTMTpro [K14]; 1xTMTpro [N-Term]	32.8971	21	8.838e-06																	35.1	34.8	42.7	43.4	34.1	44.8	39.9	41.1	35.1	33.6	51.5	70.6	68.9	70.6	48.1	52.5
High	A2A690	Protein TANC2 OS=Mus musculus OX=10090 GN=Tanc2 PE=1 SV=1	SNSSVGSPTR	1xTMTpro [N-Term]	19.2722	28	2.218e-05	55.6	51	54.3	74	45.8	49.3	35.2	32.7	37.1	32	110	105.4	115.9	134.7	68.2	71.1	111.6	110.9	114.4	127.3	88.9	126.7	84.9	101.8	102.2	84.5	228.2	222.3	232	265.3	137	135.1	115.7	96.2	87.2	87.5	74.2	69.6	57.7	71.5	79.3	66.6
High	A2A690	Protein TANC2 OS=Mus musculus OX=10090 GN=Tanc2 PE=1 SV=1	SNSSVGSPTR	1xDeamidated [N2]; 1xTMTpro [N-Term]	21.4887	10	0.001079	71.1	64.7	65.4	75.9	52.9	66.4	39.7	46.1	48.9	40.9	70.6	60.1	69.8	73.4	58.7	60.2
High	A2A690	Protein TANC2 OS=Mus musculus OX=10090 GN=Tanc2 PE=1 SV=1	SPQLTAYREQLLR	1xTMTpro [N-Term]	54.1477	9	5.039e-05	57.1	79.3	93.1	116.5	73.1	99.2	70.3	62.3	81.8	71.9	130.1	154.4	139.6	154.9	93.1	103.3
High	A2A690	Protein TANC2 OS=Mus musculus OX=10090 GN=Tanc2 PE=1 SV=1	SQSASYYPVCHSK	1xCarbamidomethyl [C10]; 1xTMTpro [K13]; 1xTMTpro [N-Term]	37.9825	36	8.838e-06																																	54.9	50.7	46.8	47.5	45.2	34.7	45.5	51.1	47.6	44.6
High	A2A690	Protein TANC2 OS=Mus musculus OX=10090 GN=Tanc2 PE=1 SV=1	SQSGSPVR	1xTMTpro [N-Term]	20.0896	17	0.0003877	136.3	147.6	151.8	205.7	127	151.3	119.4	131.5	161.9	152.5	494.8	438.4	489	539.2	257.8	256.3	196.9	223.3	209.4	257.6	194	258.6	215.6	227.3	292.2	218.3	632.2	704.3	654.8	727.8	337.6	332.6	156.7	151.6	137.4	147.1	120.9	125.9	99.9	131.9	163	141.6
High	A2A690	Protein TANC2 OS=Mus musculus OX=10090 GN=Tanc2 PE=1 SV=1	SSDGGSEEPPDRR	1xTMTpro [N-Term]	15.5475	29	8.838e-06	58.3	70.2	59.4	83.2	53.2	67.1	46.9	52.8	51.5	50.2	156.7	145	167	163.7	91.4	90.5	122.5	125.3	143.2	128.4	112.5	133.3	104.2	103.1	117.3	99.7	266.1	278.6	275.4	287.3	171	164.4	59.6	52.2	45.7	41.9	53.9	41.2	36	38.8	46.9	47.5
High	A2A690	Protein TANC2 OS=Mus musculus OX=10090 GN=Tanc2 PE=1 SV=1	TLPVAQAYQDNLYR	1xTMTpro [N-Term]	63.0208	68	8.838e-06	144.3	174.9	156	177.1	232.5	150.6	111	120.2	111.9	119.1	107.2	127.4	106.8	118.4	134.1	141.6																	170.3	240.9	142.9	149.1	239	115.4	118.5	116.1	130.5	125.8
High	A2A690	Protein TANC2 OS=Mus musculus OX=10090 GN=Tanc2 PE=1 SV=1	TLSQGSYLYLK	1xTMTpro [K11]; 1xTMTpro [N-Term]	65.0792	29	0.0003075																																	116	119.4	98.8	108.1	104.2	78.7	91.8	108.2	116.6	110.1
High	A2A690	Protein TANC2 OS=Mus musculus OX=10090 GN=Tanc2 PE=1 SV=1	TQQYPHLHQQNR	1xTMTpro [N-Term]	23.183	25	5.039e-05	82.3	87.8	81.5	113.1	91.4	104.1	78.7	86.3	79.7	87.3	108.5	95.6	96.1	116	100.4	107.8	36.1	40.9	43.6	42.4	44.3	40.9	36.6	46.2	39.4	44.4	63.1	76.6	71.2	74.3	51.9	48.5	60.5	52.1	42.2	50.4	49.3	36.7	40.6	42.9	57.2	53.7
High	A2A690	Protein TANC2 OS=Mus musculus OX=10090 GN=Tanc2 PE=1 SV=1	TSLQEITK	1xTMTpro [K8]; 1xTMTpro [N-Term]	51.6161	23	0.0005164	112.8	117.9	120	149.2	109.3	136.3	92.9	122.3	115.5	127.2	241.3	235.5	237.7	295.4	159.7	169.3	105.1	100	110.3	110.5	102.5	128.2	100.9	119	127.3	116.7	207.8	233.8	204.3	213.8	157.9	149.7	155.3	139.4	116.2	136.5	112.6	111.2	103.9	127	135	134.7
High	A2A690	Protein TANC2 OS=Mus musculus OX=10090 GN=Tanc2 PE=1 SV=1	TTPFMGIIDK	1xTMTpro [K10]; 1xTMTpro [N-Term]	76.828	26	8.838e-06	100.4	111	111.1	158.1	108.1	136	89.8	113.8	116.8	108	293	255	293.6	320.6	170.2	158.4	44.4	60.7	64.7	58.7	48.7	60.6	55.2	49.7	58.9	48.6	105.9	122.4	113.5	120.1	71.6	79.9	188.9	158.4	152.4	165.5	142.4	132.3	118	136.5	148.6	148.9
High	A2A690	Protein TANC2 OS=Mus musculus OX=10090 GN=Tanc2 PE=1 SV=1	VDENMAASTYSLNKIPER	1xTMTpro [K14]; 1xTMTpro [N-Term]	58.6434	45	8.838e-06	128.2	138.6	134.7	183.2	135.9	158.7	126.6	142.5	113.4	135	186.5	161.4	170.9	199.3	149.4	161.1	139.6	176	169.8	154.3	163.4	156.4	149.4	144.7	132.8	116.7	211.2	232.9	226	227.6	182	187.6
High	A2A690	Protein TANC2 OS=Mus musculus OX=10090 GN=Tanc2 PE=1 SV=1	VSLLLNLSR	1xTMTpro [N-Term]	81.8962	28	5.039e-05	14.2	15.8	17.7	20.6	13.1	17.5	14.2	11.1	13.7	9.5	20.3	22.6	29.5	30.1	14.6	18	34	30.4	41.7	35	31.5	37.2	31.6	32.9	28.3	22.4	42.5	46.4	53.9	56.7	37	45.1	84.6	84.6	71.1	73.1	61.6	49.3	49.6	56.3	67.4	50.4
High	A2A690	Protein TANC2 OS=Mus musculus OX=10090 GN=Tanc2 PE=1 SV=1	VSQASSYPDVK	1xTMTpro [K11]; 1xTMTpro [N-Term]	46.4231	36	2.785e-05																	149.2	166.8	170.6	190.8	156.7	182.6	164.9	172	182.9	155.8	261.6	257.8	277.5	271.1	210.1	218.9
High	A2A690	Protein TANC2 OS=Mus musculus OX=10090 GN=Tanc2 PE=1 SV=1	YQQETNVSQLPGRPK	1xTMTpro [K15]; 1xTMTpro [N-Term]	43.0702	64	8.838e-06																	40.5	46	49.9	53.9	41.8	63.8	51	56.9	62	54.4	115.9	143.2	120	141.3	77.1	74.4
High	A2A690	Protein TANC2 OS=Mus musculus OX=10090 GN=Tanc2 PE=1 SV=1	YQSSQGDMGVSQSR	1xOxidation [M8]; 1xTMTpro [N-Term]	24.1618	55	8.838e-06	4.6	8.9	10	9.9	13.6	7.3	12.3	8.2	8.8	7.1	15.5	19.5	16.2	22.6	13	9.9
High	A2A690	Protein TANC2 OS=Mus musculus OX=10090 GN=Tanc2 PE=1 SV=1	YQSSQGDMGVSQSR	1xTMTpro [N-Term]	30.7148	77	8.838e-06	29.2	22.3	35.9	40.3	39.5	34.7	25.1	30.8	29.7	26.8	73.8	61	74.7	80	46.6	49.4	60.8	60.7	55.4	61.4	52	63.9	56.9	53.9	63	64.2	106.7	111.1	99.9	116.9	75.9	86.1	38.2	38.4	29.9	43.1	40.4	29.1	28.5	35.9	33	34.8
High	A2A690	Protein TANC2 OS=Mus musculus OX=10090 GN=Tanc2 PE=1 SV=1	YSQTPQIGR	1xTMTpro [N-Term]	35.8593	19	0.001143	211.4	237.5	256	318.5	206.3	258.5	183.1	209.2	256.8	242.5	554.1	506	526.2	544.8	341.1	324.5																	390.4	360.3	324	361.4	333.3	287.7	305.3	344.6	456.1	441.9
High	A2A699	Protein FAM171A2 OS=Mus musculus OX=10090 GN=Fam171a2 PE=1 SV=1	ALAVGTSIPAWR	1xTMTpro [N-Term]	67.0883	51	8.838e-06																	67	93.9	67.2	84.7	72.8	83.8	68	75.5	54.8	50.6	27.7	34.8	22.3	20.5	59.9	62.1	266.2	252.4	215.1	210.2	221.4	185.6	185.2	191.6	168.9	168.8
High	A2A699	Protein FAM171A2 OS=Mus musculus OX=10090 GN=Fam171a2 PE=1 SV=1	AQLPAPPPPAPPR	1xTMTpro [N-Term]	50.2079	50	8.838e-06	106.1	119.9	133.7	159.8	135.3	161.5	116.2	156.8	130.5	132.9	123.7	133.3	94.1	131.6	140.1	137.4	113.2	113.8	115.8	121.6	100.2	106.5	102	94.1	87.7	87.4	72.5	94.8	73.4	85.3	105.3	106.3	149.5	138.8	105.9	133.3	123.5	96.2	104.2	111.2	91	103.2
High	A2A699	Protein FAM171A2 OS=Mus musculus OX=10090 GN=Fam171a2 PE=1 SV=1	AWFVSLDGR	1xTMTpro [N-Term]	74.5659	33	2.785e-05	123.7	128	179.6	192.4	152	165.4	118.3	136.6	99.3	117.9	69.1	78.4	28.5	38.8	115	118.2	39.1	46.3	47.3	42.4	43.3	43.8	35	37.9	29.9	29.2	18.7	20.8	10.1	12.8	30.6	33.7	177.3	155.2	182.2	163.2	150.7	132.6	119.2	140	129.7	134.4
High	A2A699	Protein FAM171A2 OS=Mus musculus OX=10090 GN=Fam171a2 PE=1 SV=1	KLLELGVKPHPR	2xTMTpro [K1; K8]; 1xTMTpro [N-Term]	55.2764	3	0.001885	57.8	57.1	81.5	95	69.2	93	62.3	66.6	50.4	58.7	31.9	34.5	13.7	18.6	66.2	52.1
High	A2A699	Protein FAM171A2 OS=Mus musculus OX=10090 GN=Fam171a2 PE=1 SV=1	LPVSSTYSQLWASLTPASTQQEMR	1xTMTpro [N-Term]	92.6764	56	8.838e-06	37.2	47.2	56	50.7	35.3	42.3	31.2	37.5	35.9	35	48.7	54.8	49.7	47.3	41.6	46.7	40.8	56.4	45.7	47.8	44.9	53.2	55.7	56.7	57.3	47.9	34.5	42.1	27.7	44.7	50.4	54.5
High	A2A699	Protein FAM171A2 OS=Mus musculus OX=10090 GN=Fam171a2 PE=1 SV=1	NVMPTLVIPAHYVR	1xTMTpro [N-Term]	67.497	31	3.33e-05																	17.8	18	23.4	20.7	20.8	21.3	21.7	16.8	17.1	16.8	14.7	18.5	12	14.4	15	19.4
High	A2A699	Protein FAM171A2 OS=Mus musculus OX=10090 GN=Fam171a2 PE=1 SV=1	REERPLMVFNVK	1xTMTpro [K12]; 1xTMTpro [N-Term]	55.4612	10	7.513e-05	120.5	124.2	162.4	189.4	144.1	160.3	119	132.2	105.1	115.1	90	93.1	65.5	89.6	122.7	127.4	223.3	238	263.5	280.4	243.6	293.7	236.5	243.6	207.7	197.5	101	121.4	59.8	71.1	217.6	220.3	266.9	250.7	246.2	248	225.5	211.1	210.3	230.1	248.2	217.3
High	A2A699	Protein FAM171A2 OS=Mus musculus OX=10090 GN=Fam171a2 PE=1 SV=1	SASRPAAEPPGAR	1xTMTpro [N-Term]	21.3479	21	6.035e-05	311.7	322.8	408.3	507.4	340.5	402	268.7	313.8	256.9	240.8	146.5	154.7	73.6	99.9	262.9	273	186.8	166.1	216	213.3	185.7	212.1	165.9	170.4	148.6	124.7	69.4	82.5	48.9	44.4	138.3	145.1	402.4	359.3	341.7	347.9	343	286.4	262.3	308.5	265.6	238.2
High	A2A699	Protein FAM171A2 OS=Mus musculus OX=10090 GN=Fam171a2 PE=1 SV=1	SQPWVQFQR	1xTMTpro [N-Term]	55.8292	34	0.0002549	86.6	98.6	93.6	104	85.9	86.9	62.2	60.1	58.4	64.3	36.3	38.1	25.3	34.6	70.7	75	61.1	76.9	76	70.1	72.6	74.6	58.6	60.4	53.4	44.2	23.7	35.6	15.3	14.9	59.4	51.9	126.9	112.4	106.3	115.4	99.7	91.3	85.9	91.2	74.8	83.1
High	A2A699	Protein FAM171A2 OS=Mus musculus OX=10090 GN=Fam171a2 PE=1 SV=1	SVEGPGGLEPSLDEYRR	1xTMTpro [N-Term]	50.2789	22	8.838e-06	288.7	332.2	372.7	450.6	238.9	371.4	239.4	271	230	307.3	169	188.8	80.5	107.1	262.5	275.8																	300.7	297.6	280.9	270.7	259.9	226	214.3	220.6	221.9	229.5
High	A2A699	Protein FAM171A2 OS=Mus musculus OX=10090 GN=Fam171a2 PE=1 SV=1	TGLCSPEDNSLTPLLDEVVAPEGR	1xCarbamidomethyl [C4]; 1xTMTpro [N-Term]	88.949	104	8.838e-06																	47.3	51	50.9	53.7	44.6	64.3	57.6	59.3	58.1	47.4	46.3	40.7	42	39.6	50.9	57.3	49.6	44.8	44	50.8	43.6	45.4	44.5	42.1	48.3	40.3
High	A2A699	Protein FAM171A2 OS=Mus musculus OX=10090 GN=Fam171a2 PE=1 SV=1	TVEGAGLK	1xTMTpro [K8]; 1xTMTpro [N-Term]	44.2842	30	7.513e-05																	205.9	204.3	232.7	225.9	230.6	251.9	191.3	192.5	169.8	159.8	71.2	82.8	40.3	42.2	164.1	167.6	250	216.3	230.3	239.5	215.4	195.2	184.5	210.2	169.1	177.4
High	A2A6A1	G patch domain-containing protein 8 OS=Mus musculus OX=10090 GN=Gpatch8 PE=1 SV=1	LGVSFSFAK	1xTMTpro [K9]; 1xTMTpro [N-Term]	77.0864	3	0.002684																																	109.7	88.1	110.4	119.2	160.8	132.2	144	170.8	151.1	147.5
High	A2A6A1	G patch domain-containing protein 8 OS=Mus musculus OX=10090 GN=Gpatch8 PE=1 SV=1	LHELAEQR	1xTMTpro [N-Term]	33.9094	44	3.865e-05																	2.9	7.2	12.1	13.5	17.6	25.1	31.1	23.8	25.6	14.6	30.9	34.1	34.3	38.7	16	21.1	6.8	5.3	6.2	6.4	15.5	15.3	15.1	22.2	18.8	21.3
High	A2A6A1	G patch domain-containing protein 8 OS=Mus musculus OX=10090 GN=Gpatch8 PE=1 SV=1	SSAAADSER	1xTMTpro [N-Term]	15.9928	19	0.001928	11.8	7.3	12.9	12.3	23.4	23.7	26.7	34.5	26	34.3	40.1	41.8	49.5	54.8	29.9	32.5	6.1	6.6	9.1	11.7	16.8	15.1	31.8	17.8	22	17.1	25.6	23	26.7	28	15.7	20.6	22.2	15.5	24.2	24.4	41.5	37.8	39.1	56.6	56.4	61.7
High	A2A6A1	G patch domain-containing protein 8 OS=Mus musculus OX=10090 GN=Gpatch8 PE=1 SV=1	TAASPGAER	1xTMTpro [N-Term]	19.4702	17	0.001812	33.1	30.5	26.7	26.4	32.6	35	33.2	31.4	29.9	29.8	56.9	45.5	46.6	55.8	34	32.2	27	27.4	30.2	32.3	37.5	36.4	75.5	50.5	57.2	33.8	64.3	63.7	66.6	63.4	41.1	49.7	49.3	43.3	38.3	35.9	60.1	49.1	64.2	75.1	67.5	68.2
High	A2A6Q5	Cell division cycle protein 27 homolog OS=Mus musculus OX=10090 GN=Cdc27 PE=1 SV=1	FSLAEMHFQK	1xTMTpro [K10]; 1xTMTpro [N-Term]	68.3862	26	3.33e-05	19.7	22	24.3	28.6	24.9	32.5	18.7	20.8	19.2	19.9	44.8	41.8	51.7	76	37.6	39.2	7.9	8.3	6.8	10.8	10.3	14.2	6.3	9.5	12.4	8.1	14.5	19.9	16	19.3	16.1	13.7	19.7	16.1	14.8	18.5	16	18.9	15	20.4	17.9	21
High	A2A6Q5	Cell division cycle protein 27 homolog OS=Mus musculus OX=10090 GN=Cdc27 PE=1 SV=1	GHSCTTPQCK	2xCarbamidomethyl [C4; C9]; 1xTMTpro [K10]; 1xTMTpro [N-Term]	22.4438	19	7.115e-05	13.6	16	25.1	23.1	24	24.6	25.6	25.6	16.6	22.5	31.4	44.4	33.1	51.5	31.8	26.2
High	A2A6Q5	Cell division cycle protein 27 homolog OS=Mus musculus OX=10090 GN=Cdc27 PE=1 SV=1	LNLESSNSK	1xTMTpro [K9]; 1xTMTpro [N-Term]	48.2434	29	2.785e-05	26.1	22.8	33.3	33.1	25.9	33.3	26.1	34.7	25.6	30.7	47.3	53.4	48	63.2	40.6	42.4	21.7	34.7	31.6	37.1	36	35.5	35.1	38.4	35	37.6	53.8	69.3	73.4	84	47.8	52.4
High	A2A6T1	Cerebellar degeneration-related protein 2-like OS=Mus musculus OX=10090 GN=Cdr2l PE=1 SV=1	ALFKEIFAR	1xTMTpro [K4]; 1xTMTpro [N-Term]	78.2248	8	0.001507	27.9	42.2	79.3	97.1	95.3	148.3	99.5	67.8	103.9	60.2	26.1	47.6	14.8	34.9	47.5	53.9
High	A2A6T1	Cerebellar degeneration-related protein 2-like OS=Mus musculus OX=10090 GN=Cdr2l PE=1 SV=1	EVDEQYHALLEKYEELLSK	2xTMTpro [K12; K19]; 1xTMTpro [N-Term]	92.5533	37	8.838e-06	20.1	16.3	30.6	29.7	34.1	38	33.9	44.4	34.3	31.3	22.5	20.9	13.6	15.4	25.7	32.3	49.2	39.3	81.6	78.3	133	144.8	169.8	147.8	127.4	95.6	51.1	44	41.6	43.2	103.6	99.6
High	A2A6T1	Cerebellar degeneration-related protein 2-like OS=Mus musculus OX=10090 GN=Cdr2l PE=1 SV=1	IHGLTETIER	1xTMTpro [N-Term]	46.3424	49	8.838e-06	18.8	25.7	32.8	41.3	70.7	49.6	54.3	56.3	52.4	52.6	31.8	19.4	20.8	23.5	37.5	36.5	7.9	13.8	14.5	16.7	20.3	19.8	22.4	24.8	19.5	20.7	13.9	11.9	8.9	10.1	17.4	13.9	40.2	38	36.1	41.1	65.7	50.3	56.5	75.1	72	46.3
High	A2A6T1	Cerebellar degeneration-related protein 2-like OS=Mus musculus OX=10090 GN=Cdr2l PE=1 SV=1	LQTLVGVLR	1xTMTpro [N-Term]	80.9924	30	3.33e-05	51	47.8	70.1	89.5	111.4	105.2	108	128	104.4	110.2	69.4	66	58.1	73.5	89.4	101.2	61.1	80.8	99.6	105.2	150.8	146.9	183.1	156.9	147.6	113.4	86.1	83.5	84.5	88.8	119.4	126.7	95.7	93.8	109.8	126.2	159	149.5	158.5	182.4	175.7	140.1
High	A2A6T1	Cerebellar degeneration-related protein 2-like OS=Mus musculus OX=10090 GN=Cdr2l PE=1 SV=1	VYEQLDLTAR	1xTMTpro [N-Term]	59.2303	31	8.838e-06	67.3	64.1	96.4	114.9	147.4	154.5	143.3	158.6	114.4	130.2	92.8	85.3	75.4	90.1	100.4	109
High	A2A7S8	Uncharacterized protein KIAA1522 OS=Mus musculus OX=10090 GN=Kiaa1522 PE=1 SV=1	LIPHAVLPPTVDVVALGR	1xTMTpro [N-Term]	85.6603	55	8.838e-06	31.6	30.2	25.6	36.9	26.2	27.8	21.9	26.3	17.7	19.6	18.6	21.6	15.3	16.6	19.1	21.7
High	A2A7S8	Uncharacterized protein KIAA1522 OS=Mus musculus OX=10090 GN=Kiaa1522 PE=1 SV=1	SSGQLSGR	1xTMTpro [N-Term]	19.835	11	0.0004094	67.2	76.6	91.8	116.4	87.7	108.1	88.2	87.2	86.5	87.7	81.4	116.1	75.6	105.6	87.2	81.1	131	127.9	132.8	144.2	129.4	153.6	130.9	125	130.7	103.4	101.1	101	85.8	96.6	113.5	111.5	118	97	95.9	113.5	109.6	103.4	101.2	118	108.4	99.6
High	A2A891	Calmodulin-binding transcription activator 1 OS=Mus musculus OX=10090 GN=Camta1 PE=2 SV=1	AAVLIQNFYR	1xTMTpro [N-Term]	73.5202	18	5.039e-05																	42.5	43.6	52	48.5	48.6	80.5	63.4	66.3	83.4	66.6	157.4	142.1	168.2	153.8	101	99.2	62.1	71.5	52.2	57.7	67	64.4	64.5	80.9	102.5	106.4
High	A2A891	Calmodulin-binding transcription activator 1 OS=Mus musculus OX=10090 GN=Camta1 PE=2 SV=1	AISIPDSLGR	1xTMTpro [N-Term]	60.6777	24	7.513e-05																																	25.9	24	25.7	35.5	40.9	31.1	42.6	50.5	68.9	70.8
High	A2A891	Calmodulin-binding transcription activator 1 OS=Mus musculus OX=10090 GN=Camta1 PE=2 SV=1	DAAPSQVRPR	1xTMTpro [N-Term]	22.3682	15	0.0004904	97.6	104.6	127.4	142.6	168.3	159.6	146.1	165.1	189.5	205.7	433.8	374.9	419.6	435.7	250.7	250.2	30.5	34.9	43	49	48.4	60.3	65.3	68.2	87.1	72.4	159.3	177.2	186.3	169.4	105.1	112.2	44.5	42	47.9	46.1	52.8	56.7	61.2	65.3	90.5	87.5
High	A2A891	Calmodulin-binding transcription activator 1 OS=Mus musculus OX=10090 GN=Camta1 PE=2 SV=1	EELIGQLKPMFHGIK	2xTMTpro [K8; K15]; 1xTMTpro [N-Term]	79.776	21	2.218e-05																																	56.1	61.9	57.2	65.4	76.1	65.2	72.5	83.1	103.4	99.4
High	A2A891	Calmodulin-binding transcription activator 1 OS=Mus musculus OX=10090 GN=Camta1 PE=2 SV=1	EQQEVAAAVIQR	1xTMTpro [N-Term]	44.4913	53	8.838e-06	19.2	17.7	25	22.4	24.4	27.3	24.5	26.5	30.3	21.5	35.3	36	29.8	35.3	34.5	28.2
High	A2A891	Calmodulin-binding transcription activator 1 OS=Mus musculus OX=10090 GN=Camta1 PE=2 SV=1	EVVNTEMGAYR	1xTMTpro [N-Term]	42.7735	32	5.039e-05																	12.8	17.4	16.3	28	22.4	23.2	28.4	27.7	38.2	35.5	77.8	85.9	91.8	93.2	43.9	42.5
High	A2A891	Calmodulin-binding transcription activator 1 OS=Mus musculus OX=10090 GN=Camta1 PE=2 SV=1	IKQENFVPMESSALER	1xTMTpro [K2]; 1xTMTpro [N-Term]	62.5333	33	8.838e-06	48.4	57.2	67.4	87.8	109.5	102	89.9	115	110.6	114.3	328	290.3	323	360.6	157.7	178.6																	85	88.9	72.6	78	104.7	85.3	100.9	122.6	152.8	160.1
High	A2A891	Calmodulin-binding transcription activator 1 OS=Mus musculus OX=10090 GN=Camta1 PE=2 SV=1	KQDQAAR	1xTMTpro [K1]; 1xTMTpro [N-Term]	19.6222	2	0.002572	35.2	62.9	82.1	98.4	106.9	116.9	86.2	100.4	133.1	118.8	335.1	324.4	364.6	392	160.1	165.7
High	A2A891	Calmodulin-binding transcription activator 1 OS=Mus musculus OX=10090 GN=Camta1 PE=2 SV=1	LAECLEHLQRDEQAQLGQASR	1xCarbamidomethyl [C4]; 1xTMTpro [N-Term]	64.214	61	8.838e-06	1.8	2.9	4.8	5.1	4.2	7	9.8	7.1	10.9	5.5	35.5	26.5	24.2	34.8	11.7	11.3																		5.6	7.1	6.7	9	7	9.9	11	15.7	13.9
High	A2A891	Calmodulin-binding transcription activator 1 OS=Mus musculus OX=10090 GN=Camta1 PE=2 SV=1	TAVIVQQK	1xTMTpro [K8]; 1xTMTpro [N-Term]	46.6474	23	0.001125	9.6	15.4	17.1	25.8	26.8	27.8	32.5	34.2	40	27.9	105	72.8	110.1	111.1	47.8	49.6	20.9	20.9	26.4	27.7	26.2	35.1	36.3	35.9	43	34.4	83.7	83.7	114.1	106.6	54.1	50.5	20.5	21.1	27.8	30.4	35.4	38.4	42.1	50.7	74.4	52.3
High	A2A8L1	Chromodomain-helicase-DNA-binding protein 5 OS=Mus musculus OX=10090 GN=Chd5 PE=1 SV=1	AFLNAIMR	1xTMTpro [N-Term]	75.5163	33	0.0008007	11.1	8.5	14.3	17.1	17.1	24.9	14.8	18.2	18	19.7	56.1	51.2	67.4	82.4	26.3	29	10	11.2	13.5	13.8	12.2	16.4	17.7	18	21.6	20.2	43.3	40.1	51.1	47.8	27.3	28.5	11.1	14.5	14.2	11.3	20.3	16.4	14.9	15.6	24.6	18.9
High	A2A8L1	Chromodomain-helicase-DNA-binding protein 5 OS=Mus musculus OX=10090 GN=Chd5 PE=1 SV=1	IGVMSLVR	1xTMTpro [N-Term]	66.2696	10	0.005226																	8.3	9.8	11.3	11.5	10.9	10.3	12.9	12.6	16.2	8.7	25.6	15	28	28.8	20.8	17.9
High	A2A8L1	Chromodomain-helicase-DNA-binding protein 5 OS=Mus musculus OX=10090 GN=Chd5 PE=1 SV=1	KAFLNAIMR	1xTMTpro [K1]; 1xTMTpro [N-Term]	70.2593	8	9.049e-05	23.8	19.9	37.3	39.9	57.8	58.2	50.9	61.2	69.1	51.1	136.5	130.5	164.4	218.2	81.6	77.7	8.7	12.2	12.9	8.7	13.8	13.6	18.5	19.7	18.6	14.4	35.5	32.3	39.8	42.3	17.9	20.7	36.6	42	44.7	50.2	73.8	59.2	87.3	80.3	94.2	80.5
High	A2A8L1	Chromodomain-helicase-DNA-binding protein 5 OS=Mus musculus OX=10090 GN=Chd5 PE=1 SV=1	VLIFSQMTK	1xTMTpro [K9]; 1xTMTpro [N-Term]	80.9074	28	0.0001094																	6.1	11.3	8.3	8.9	8.5	12.9	8.3	11.7	8.7	15.2	23.4	25.6	29.9	32.5	18.9	17	14.5	22.8	19.2	15.5	26	19.9	29.6	26.8	30.1	25.6
High	A2A8L5	Receptor-type tyrosine-protein phosphatase F OS=Mus musculus OX=10090 GN=Ptprf PE=1 SV=1	AYIATQGPLAESTEDFWR	1xTMTpro [N-Term]	80.524	28	8.838e-06	97.4	107.1	138.1	175.8	126.2	159.5	111.2	135.1	129.6	135.4	94.4	107.4	78.8	103.6	145.5	134.1
High	A2A8L5	Receptor-type tyrosine-protein phosphatase F OS=Mus musculus OX=10090 GN=Ptprf PE=1 SV=1	DHPPIPITDLADNIER	1xTMTpro [N-Term]	66.9008	74	8.838e-06	113.2	115.2	122.5	153.3	109.6	132.9	97.2	106.5	111.1	106.3	81.9	95.3	67.5	84.6	113	122.4																	164.9	148.6	123.3	135.6	115.3	103.4	105.8	110	104.1	99.2
High	A2A8L5	Receptor-type tyrosine-protein phosphatase F OS=Mus musculus OX=10090 GN=Ptprf PE=1 SV=1	FSQEYESIDPGQQFTWENSNSEVNKPK	2xTMTpro [K25; K27]; 1xTMTpro [N-Term]	70.1936	26	8.838e-06																	39.8	70.4	45.7	74.5	50.1	91.4	46.3	67.1	44.6	55.9	19.5	32	13.7	14.3	44.8	43.5
High	A2A8L5	Receptor-type tyrosine-protein phosphatase F OS=Mus musculus OX=10090 GN=Ptprf PE=1 SV=1	IQLSWLLPPQER	1xTMTpro [N-Term]	90.3403	33	8.838e-06	36.5	40.7	37.8	50.7	33.3	41.4	28.1	30	30.5	25.4	24.7	26.6	24.1	27	35.2	31.5	38.7	54.9	40	48.2	35.1	48	38.4	41.2	31.6	37.6	26.2	29.7	28.4	28.7	39.2	37.9
High	A2A8L5	Receptor-type tyrosine-protein phosphatase F OS=Mus musculus OX=10090 GN=Ptprf PE=1 SV=1	KLIADLQPNTEYSFVLMNR	1xTMTpro [K1]; 1xTMTpro [N-Term]	83.2193	64	8.838e-06	29.4	41.3	48.8	62	49.1	53.5	38.1	46.7	33.2	32.2	16.3	16.2	6.8	12.9	39.7	35.5	52	80.1	49.4	91.3	52.9	101.2	49.5	78	42.9	62.9	22	33.6	9.7	17.7	48.8	59.3	52.9	62.9	61.6	65.6	53.2	52	53	51.1	48.4	43.8
High	A2A8L5	Receptor-type tyrosine-protein phosphatase F OS=Mus musculus OX=10090 GN=Ptprf PE=1 SV=1	LIADLQPNTEYSFVLMNR	1xTMTpro [N-Term]	92.1089	73	8.838e-06	16.3	20.8	18.9	28.8	21.3	26.7	16.5	18.3	16.1	19.6	7.9	9.8	9	9.6	22.1	17.6	15.7	27	25.5	30.2	20.1	33.9	18.7	29.4	16.4	24.5	11.1	17.8	9.4	11.5	23.5	18.9	24.2	25.8	20.6	18.8	17	16.4	21.4	17.6	19.4	17.5
High	A2A8L5	Receptor-type tyrosine-protein phosphatase F OS=Mus musculus OX=10090 GN=Ptprf PE=1 SV=1	LVNIMPYELTR	1xTMTpro [N-Term]	80.0028	22	3.33e-05																	202.2	287	240.6	311.1	194.5	319.2	204.9	242.2	168.8	202.5	111.5	166.8	112	123.2	190.9	193.7	220.9	232.8	187.2	206.5	188.5	186.3	172.9	193.2	168.6	162.6
High	A2A8L5	Receptor-type tyrosine-protein phosphatase F OS=Mus musculus OX=10090 GN=Ptprf PE=1 SV=1	NVLELSNVMR	1xTMTpro [N-Term]	69.2708	38	8.838e-06																	128.8	211.4	155.1	271	154.1	268.5	156.7	246.3	141.1	174.3	94.9	137	78.1	117.2	141.7	146.9
High	A2A8L5	Receptor-type tyrosine-protein phosphatase F OS=Mus musculus OX=10090 GN=Ptprf PE=1 SV=1	TAPDLLPQKPLPASAFIEDGR	1xTMTpro [K9]; 1xTMTpro [N-Term]	78.3582	37	8.838e-06																	23	39.9	20.4	46.3	29.9	45.6	22.1	39.4	24.2	25.3	11.9	13.7	5.7	9.3	17.4	21.4	58.8	54.5	55.7	59.8	52.9	53.9	42.3	52	42.6	39.8
High	A2A8L5	Receptor-type tyrosine-protein phosphatase F OS=Mus musculus OX=10090 GN=Ptprf PE=1 SV=1	TGEGFIDFIGQVHK	1xTMTpro [K14]; 1xTMTpro [N-Term]	76.0815	68	8.838e-06																	205.1	305.6	246.4	393.7	237	405.2	250.4	337.5	233.3	241.6	137.8	178.7	105	115	210.9	222.9
High	A2A8L5	Receptor-type tyrosine-protein phosphatase F OS=Mus musculus OX=10090 GN=Ptprf PE=1 SV=1	TGEQAPSSPPR	1xTMTpro [N-Term]	23.8242	25	3.33e-05	47.1	55.2	58	86	57.1	69.5	50.1	57.1	50.6	49.4	57.5	67.8	50.3	45.9	50.4	56.2	35.7	55.5	48.7	87.7	50	80.6	43.3	73	46.6	49.2	41.7	59.9	49	44.9	51.3	49.1	65.4	55.9	57.6	67.5	59	52.8	55.5	63.6	55.2	55.6
High	A2A8L5	Receptor-type tyrosine-protein phosphatase F OS=Mus musculus OX=10090 GN=Ptprf PE=1 SV=1	TQQGVPAQPADFQANAESDTR	1xTMTpro [N-Term]	42.489	82	8.838e-06																	30.6	40.4	33.4	50.7	28	50.4	29.6	51.1	24.2	31.6	14.6	22.4	11.4	12	29.9	27.9	45	50.7	40	60.5	45.5	45.1	41.3	54.1	37.8	40.8
High	A2A8L5	Receptor-type tyrosine-protein phosphatase F OS=Mus musculus OX=10090 GN=Ptprf PE=1 SV=1	VLAFTAVGDGPPSPTIQVK	1xTMTpro [K19]; 1xTMTpro [N-Term]	84.408	66	8.838e-06																																	96.6	100.5	93.4	109.2	96.3	87.3	81.6	102.3	91.3	86.9
High	A2A8L5	Receptor-type tyrosine-protein phosphatase F OS=Mus musculus OX=10090 GN=Ptprf PE=1 SV=1	VLAVNSIGR	1xTMTpro [N-Term]	54.592	29	5.606e-05	109	133	151.2	175.9	157.4	169.4	111.2	139.2	107.4	120.1	56.8	63	32.4	47.4	127.6	125	93	166.5	104.1	180.9	108.1	183.4	97.6	153.6	90.6	117.9	44.7	60.4	35	51.7	94.9	95.1	155.4	176.3	144.6	162.1	171.1	143.2	132	152.9	136.1	117.1
High	A2A8L5	Receptor-type tyrosine-protein phosphatase F OS=Mus musculus OX=10090 GN=Ptprf PE=1 SV=1	VLLTSIDGVPGSDYINANYIDGYR	1xTMTpro [N-Term]	90.7128	92	8.838e-06	50	50.5	58.6	76	52.3	60	44	60.5	43.1	47	29.1	34	27.5	26.5	50.9	49	53.6	79.8	62.4	70.6	59.7	65.6	48.7	54	46.2	50.6	34.3	47.2	35	33.8	47.4	55.3	64.4	63.1	49.2	60.7	56.7	51	47	58.2	52.2	49.8
High	A2A8L5	Receptor-type tyrosine-protein phosphatase F OS=Mus musculus OX=10090 GN=Ptprf PE=1 SV=1	VTFDPTSSYTLEDLKPDTLYHFQLAAR	1xTMTpro [K15]; 1xTMTpro [N-Term]	87.1422	4	3.33e-05																	46.1	65.9	63.8	76.1	52.1	75.8	54.6	67.4	53.5	54.6	44.3	44.8	39.1	45.9	66	59
High	A2A8L5	Receptor-type tyrosine-protein phosphatase F OS=Mus musculus OX=10090 GN=Ptprf PE=1 SV=1	VYYTPDSR	1xTMTpro [N-Term]	39.1186	34	0.0005228	136.3	167.6	178.8	218.6	164	198.4	124.2	160.9	120.2	136.4	68	69.7	42.6	48.8	148.9	149.3	164.6	300.9	188.1	326.4	189.7	336.8	166.7	272.2	155.9	220.3	63.4	112.7	44.3	73.5	169.7	172.7	178	202.4	169.3	202.8	175.9	155.8	136.8	162.3	140.2	145.1
High	A2A8U2	Transmembrane protein 201 OS=Mus musculus OX=10090 GN=Tmem201 PE=1 SV=1	EEGRYDEEIEVYR	1xTMTpro [N-Term]	44.3428	19	8.838e-06																	80.2	102.9	98.7	140.5	145.5	189.3	176.2	167.8	197.2	200	177.7	178.7	133.5	165.8	164.9	167.3
High	A2A8U2	Transmembrane protein 201 OS=Mus musculus OX=10090 GN=Tmem201 PE=1 SV=1	HHLEQMYK	1xTMTpro [K8]; 1xTMTpro [N-Term]	33.9476	14	0.001787	78.1	88	114.6	145.2	152	166.6	160.3	197.6	191.3	214.9	160.8	165.7	90.1	99.6	132.9	145.2
High	A2A8U2	Transmembrane protein 201 OS=Mus musculus OX=10090 GN=Tmem201 PE=1 SV=1	IKQLAAFTPR	1xTMTpro [K2]; 1xTMTpro [N-Term]	63.5755	7	0.00321																	18.1	20.1	33.2	29.4	33	58.2	62.5	79.3	93	65.4	39.4	41.3	16.2	17.4	42.3	42.3
High	A2A8Z1	Oxysterol-binding protein-related protein 9 OS=Mus musculus OX=10090 GN=Osbpl9 PE=1 SV=1	HCIVLLQIAK	1xCarbamidomethyl [C2]; 1xTMTpro [K10]; 1xTMTpro [N-Term]	68.2057	36	8.838e-06																	115.5	102.2	124	144.9	127.9	133.4	145.1	140.5	149	109.5	100.1	130.4	105.2	110.1	133	136.2
High	A2A8Z1	Oxysterol-binding protein-related protein 9 OS=Mus musculus OX=10090 GN=Osbpl9 PE=1 SV=1	KLEDQNEYESR	1xTMTpro [K1]; 1xTMTpro [N-Term]	34.3692	22	8.838e-06	235.2	270.9	324.3	385.2	334.7	357.7	303.8	333.2	307.4	339.1	375.5	385.9	339	432.6	333	351.8																	326	300.2	297.3	293.1	322.6	277.2	301	293.6	333.4	278.9
High	A2A8Z1	Oxysterol-binding protein-related protein 9 OS=Mus musculus OX=10090 GN=Osbpl9 PE=1 SV=1	LFHEDGECWVYDEPLLK	1xCarbamidomethyl [C8]; 1xTMTpro [K17]; 1xTMTpro [N-Term]	82.7781	48	8.838e-06	14.7	16.7	17.5	21.5	21.3	18.7	21.1	21.5	15.9	20.7	17.4	14.7	16.4	17	17.8	22.4	42.9	49.3	53.9	57.2	64.7	66.8	71.7	76.5	69.9	64.6	45	53	40.8	46.6	66.6	59.6	13.1	16.3	13.6	17.6	21.3	15.7	18.2	19.1	23	20.5
High	A2A8Z1	Oxysterol-binding protein-related protein 9 OS=Mus musculus OX=10090 GN=Osbpl9 PE=1 SV=1	SILTVPWVELGGECNINCSK	2xCarbamidomethyl [C14; C18]; 1xTMTpro [K20]; 1xTMTpro [N-Term]	94.7471	89	8.838e-06	58.9	63.8	77.1	98.8	79.5	87.8	68.6	72.8	79.1	69.9	64.1	73.4	59	65.2	66.9	73	70.9	78.5	86.3	82.4	78.3	101.8	85.2	95.2	89.9	69.1	59.4	72.5	58.3	62.3	81.9	87.6	72.3	72.8	61.4	69.6	62.8	53.1	62.4	59.2	57.8	66.5
High	A2A8Z1	Oxysterol-binding protein-related protein 9 OS=Mus musculus OX=10090 GN=Osbpl9 PE=1 SV=1	VVLPTFILER	1xTMTpro [N-Term]	91.9643	9	0.002447	15.2	13.4	15.1	17.1	18.5	22.7	16.1	18.3	16.1	20.3	13	14.9	9.7	13.2	14.7	16.4
High	A2A8Z1	Oxysterol-binding protein-related protein 9 OS=Mus musculus OX=10090 GN=Osbpl9 PE=1 SV=1	YATGENTVFVDTK	1xTMTpro [K13]; 1xTMTpro [N-Term]	58.2948	36	2.785e-05	200.1	220.6	248.5	318.8	249.7	301.1	237.3	258.5	205.1	229.7	191.6	206.6	159.5	206.9	227	221.6
High	A2A9C3	KICSTOR complex protein SZT2 OS=Mus musculus OX=10090 GN=Szt2 PE=1 SV=1	AMAILGTEGR	1xTMTpro [N-Term]	56.5865	35	2.218e-05	13.3	14.2	19.3	23.8	14.6	19.2	12	17.8	17.2	17.1	28.7	26.8	28.2	36.5	22.5	22.2	21.8	31.1	24.3	35.5	29.5	47.4	32.3	37.7	38.5	40.1	79.8	93.8	69	74.7	39.9	46.5	70.4	70.1	60.9	73.1	67.8	67.1	70.7	60.6	89.6	94
High	A2A9C3	KICSTOR complex protein SZT2 OS=Mus musculus OX=10090 GN=Szt2 PE=1 SV=1	APGPDSGAQR	1xTMTpro [N-Term]	21.2157	20	0.0004787	66.8	71.2	91.9	104.9	99.4	110.4	84.5	98.5	123.8	114.2	297.4	280.3	246.5	265.7	154.6	152.4	65.1	89.3	78.3	104.8	90.2	131.8	94	115.5	126.6	132.2	244.8	279.4	215.2	231.7	148.5	143.5	54.4	54.8	55.6	66.6	61.5	59.6	57.6	59.8	85.9	82.7
High	A2A9C3	KICSTOR complex protein SZT2 OS=Mus musculus OX=10090 GN=Szt2 PE=1 SV=1	CKEAATHCALLQEHAQR	2xCarbamidomethyl [C1; C8]; 1xTMTpro [K2]; 1xTMTpro [N-Term]	34.7966	33	8.838e-06	20.3	26.2	30	39.4	34.6	37	32	36	35.7	40.9	82.3	65.9	79.1	86.2	46.8	45.4	11.5	15.6	13.4	14	15.2	17.9	13.1	17	16.9	19.6	23.9	30.6	33.4	33.1	22.4	18.3
High	A2A9C3	KICSTOR complex protein SZT2 OS=Mus musculus OX=10090 GN=Szt2 PE=1 SV=1	EDGGPGAECR	1xCarbamidomethyl [C9]; 1xTMTpro [N-Term]	19.1917	21	0.0005777																	24.6	32.9	27.3	37.8	29.8	43.4	30	40.1	45.1	45.2	98.1	101.8	80.7	84.7	49.5	50.5	41.2	42.2	46.9	45.2	46.2	44.8	36.1	38.6	54.7	54.5
High	A2A9C3	KICSTOR complex protein SZT2 OS=Mus musculus OX=10090 GN=Szt2 PE=1 SV=1	FESGGDGSPGR	1xTMTpro [N-Term]	30.3976	13	2.218e-05	101.4	103.7	138.8	157.3	158.4	180.9	153.4	168.5	193.7	169.5	405.3	356	334.9	385.4	206.6	218.2
High	A2A9C3	KICSTOR complex protein SZT2 OS=Mus musculus OX=10090 GN=Szt2 PE=1 SV=1	IVSGLKEEILR	1xTMTpro [K6]; 1xTMTpro [N-Term]	74.4677	7	0.001088																																	122	129.8	118.9	131.9	135.7	111.8	113.9	131.8	159.4	150.7
High	A2A9C3	KICSTOR complex protein SZT2 OS=Mus musculus OX=10090 GN=Szt2 PE=1 SV=1	KLQLLTYNWAPDLGAALGR	1xTMTpro [K1]; 1xTMTpro [N-Term]	94.1581	53	8.838e-06																																	17	17	13.1	15.4	13.4	13.1	12.3	15.7	21.2	18.8
High	A2A9C3	KICSTOR complex protein SZT2 OS=Mus musculus OX=10090 GN=Szt2 PE=1 SV=1	LFLLEPPGPDR	1xTMTpro [N-Term]	83.413	38	2.218e-05	7.3	6.3	9.3	8.4	7.6	7.8	7.3	8	4.7	7.2	24	20.8	16.9	18.5	11.5	12.7																	7.1	8.6	8.8	9.3	7.5	8	7.8	9.7	10.5	8.1
High	A2A9C3	KICSTOR complex protein SZT2 OS=Mus musculus OX=10090 GN=Szt2 PE=1 SV=1	LLLLEVTDK	1xTMTpro [K9]; 1xTMTpro [N-Term]	88.7581	33	7.115e-05																	11.8	17	24.2	16.3	21.5	24.1	20.2	21.4	23.6	21.1	42.5	56.6	49.2	47.3	31.9	33.6
High	A2A9C3	KICSTOR complex protein SZT2 OS=Mus musculus OX=10090 GN=Szt2 PE=1 SV=1	QALADAIMELR	1xTMTpro [N-Term]	82.47	58	8.838e-06	18.4	16	17.8	22.4	18	16.1	13.1	20.1	20.1	16.5	37	29	30.2	29.8	24.6	19
High	A2A9C3	KICSTOR complex protein SZT2 OS=Mus musculus OX=10090 GN=Szt2 PE=1 SV=1	QAPQTEGADGPR	1xTMTpro [N-Term]	21.9922	30	8.042e-05	12	14.3	19.2	26.3	17.6	22.9	15.3	18.1	22.9	18.9	55.1	52.4	47.7	43.9	27.9	28.1	19.3	20.8	22.4	27	24.3	22.7	24.9	21.9	21.4	21.9	31.2	32	37.6	39.5	26.7	22.6	15.4	15	14.7	16	14.8	15.6	12.3	17.4	19.7	17.8
High	A2A9C3	KICSTOR complex protein SZT2 OS=Mus musculus OX=10090 GN=Szt2 PE=1 SV=1	REDEGPRDTVDR	1xTMTpro [N-Term]	18.2865	19	0.0003477	25.6	38.3	42.2	48.3	41.8	43.3	32.5	51.1	47.6	45.9	100.2	95.9	87.1	91.2	64.2	60.7	75.6	86.2	83.7	80.1	85.7	93.7	89.6	98.4	89.6	86.9	163.1	176.7	138.9	150.4	111	106.8	69.9	53.3	48.3	50.1	63.3	46.4	56.6	51.5	64.4	61.4
High	A2A9C3	KICSTOR complex protein SZT2 OS=Mus musculus OX=10090 GN=Szt2 PE=1 SV=1	RPCPESGSGSR	1xCarbamidomethyl [C3]; 1xTMTpro [N-Term]	14.633	16	2.218e-05	20.7	28.9	31.2	41.7	26.6	38	29.2	38.4	37	44.8	77.4	64.3	73.9	73.5	46.4	48.1	76.9	79.7	78.1	82.3	61.3	103.7	60.5	87.5	82.1	92.6	163	188.1	136.3	158.5	105.2	105.6	57.6	70.1	54.3	56.3	64.5	47.7	54.4	62.8	83.1	77
High	A2A9C3	KICSTOR complex protein SZT2 OS=Mus musculus OX=10090 GN=Szt2 PE=1 SV=1	SASSSLASLSR	1xTMTpro [N-Term]	41.8595	36	2.218e-05	22.1	30.4	31.1	43.1	37.2	45.1	30.2	41.4	47.3	40.5	126.6	100.6	108.8	118.6	59.4	54.2	22	26.8	23.3	30.4	25.5	40.5	26.6	37.6	44.3	37.6	84.3	100	71.2	80.6	49.1	42.4	29.4	34	27.7	31.5	34.4	26.8	30.7	33.4	43.9	45.5
High	A2A9C3	KICSTOR complex protein SZT2 OS=Mus musculus OX=10090 GN=Szt2 PE=1 SV=1	SPGQPSSLR	1xTMTpro [N-Term]	27.7607	11	0.004549																	22.6	31.3	25	34.8	26.6	37.9	27.6	40	32.2	33.9	61.9	73.3	56.9	58.7	46.8	40.7	41.8	38.2	34.6	45.9	34.5	30.7	41.8	40.7	42.6	47.6
High	A2A9C3	KICSTOR complex protein SZT2 OS=Mus musculus OX=10090 GN=Szt2 PE=1 SV=1	SPLDMASSR	1xTMTpro [N-Term]	44.6662	22	0.0005744	26.7	42.6	49.3	58.1	52.3	58.9	45.9	52.2	55.8	65.3	156.3	161.6	127.7	141	78.3	75.1	45.6	56.3	60.9	66.2	62.6	76.2	54.6	69.3	70.4	78.6	170.7	191.6	132.7	145.2	91.1	93.6	54.4	55.1	50.3	59.1	53.5	48.1	49.2	57.6	62.6	69.1
High	A2A9C3	KICSTOR complex protein SZT2 OS=Mus musculus OX=10090 GN=Szt2 PE=1 SV=1	SSDAVRPVGQVDR	1xTMTpro [N-Term]	27.8446	10	0.0001286	135.4	155.6	192.9	248.5	242.8	282.4	229.7	260.3	269	277.9	425.1	393.1	349.2	406.4	279.1	299.9	122.3	144.7	160.7	220.4	202.8	291.3	229.1	269.1	251.3	251.5	332.7	387.6	280.2	337	238.6	240.9	180.7	201.2	189.2	229.9	253.2	250.9	244.7	269.5	303.5	267.1
High	A2A9C3	KICSTOR complex protein SZT2 OS=Mus musculus OX=10090 GN=Szt2 PE=1 SV=1	STSESSASFPR	1xTMTpro [N-Term]	32.4292	30	5.606e-05	13.4	18.1	12.7	26.2	13	24.8	18.9	18.7	23.6	24.3	50.4	53.6	46.7	53.9	30.7	29.2																	13.6	18.9	10.8	16.7	16.1	19.8	10.8	19.2	21.6	25.7
High	A2A9C3	KICSTOR complex protein SZT2 OS=Mus musculus OX=10090 GN=Szt2 PE=1 SV=1	TPGGSER	1xTMTpro [N-Term]	15.9459	3	0.004915																																	145.1	152.8	155.4	177.2	192.2	173.1	193	231	229.9	219.8
High	A2A9C3	KICSTOR complex protein SZT2 OS=Mus musculus OX=10090 GN=Szt2 PE=1 SV=1	VEVYAHAR	1xTMTpro [N-Term]	33.0232	55	2.785e-05																																	38.9	38	30.1	34.5	38.5	32.4	33.8	36.4	45.3	44.8
High	A2A9Q0	Fibronectin type III domain-containing protein 10 OS=Mus musculus OX=10090 GN=Fndc10 PE=2 SV=1	VLLGASCR	1xCarbamidomethyl [C7]; 1xTMTpro [N-Term]	49.2602	24	9.049e-05	76.1	72.9	119	112.2	143	136.7	143.3	133.4	178.3	179	105.9	104.1	58.4	71.6	120.4	129.6	90.8	110.3	109.4	120.3	136.1	174.7	158.3	192.7	200.9	187.7	90.1	108.8	44.6	68.5	118.1	121	105.2	117.1	116.5	123.3	165.4	153.7	179.4	186.4	229.4	221.5
High	A2AAE1	Transmembrane protein KIAA1109 OS=Mus musculus OX=10090 GN=Kiaa1109 PE=1 SV=4	ALSTWGPVPYLPPK	1xTMTpro [K14]; 1xTMTpro [N-Term]	85.63	34	8.838e-06																	40.3	45.2	44.7	47.3	37.9	51.3	37	48.8	44.9	50	29.7	41.7	21.4	25.6	41.1	41	58.3	45.3	43	45.9	49.3	35.7	45.6	48.9	46.4	38.5
High	A2AAE1	Transmembrane protein KIAA1109 OS=Mus musculus OX=10090 GN=Kiaa1109 PE=1 SV=4	ANNENNKK	2xTMTpro [K7; K8]; 1xTMTpro [N-Term]	25.4522	0	0.003315																																	269.5	286.2	270.1	306.9	299.5	313.5	293.9	343.6	313.7	307.2
High	A2AAE1	Transmembrane protein KIAA1109 OS=Mus musculus OX=10090 GN=Kiaa1109 PE=1 SV=4	AVLFWLNYK	1xTMTpro [K9]; 1xTMTpro [N-Term]	97.5659	28	0.0002645	8.7	13.4	13	16.1	11.5	11.4	8.1	13.9	8.8	14.2	7.3	11.3	9.6	7.1	11.1	14.8	10	12.3	12	12.6	14.4	14.4	15.3	12.9	12.3	10.4	6.1	7.6		6.1	10.3	11.8	21	23.6	16.7	22.6	18.6	20	15.5	19.4	20.7	19.3
High	A2AAE1	Transmembrane protein KIAA1109 OS=Mus musculus OX=10090 GN=Kiaa1109 PE=1 SV=4	DREISMSVGLGR	1xTMTpro [N-Term]	47.4239	30	8.838e-06	61.9	65	66.9	83.3	74.5	82.7	61.4	63.6	64.7	60	37.2	44.3	42.3	40.6	62.3	67.1	54.9	80.7	69.1	81.6	78	81.8	74.1	79.6	61.7	62	34.1	33.1	32.4	31.5	64.6	63.1
High	A2AAE1	Transmembrane protein KIAA1109 OS=Mus musculus OX=10090 GN=Kiaa1109 PE=1 SV=4	EAVLITLNRPIVYAQPVAFDR	1xTMTpro [N-Term]	83.0876	29	8.838e-06																	29.9	36.3	27.7	31.1	22.6	33.1	29.7	34.3	30	23.8	18.4	30	12.1	24.5	28.3	28.8	53.2	58.2	45.1	53.4	47.3	35.6	40	42.7	41.4	38.4
High	A2AAE1	Transmembrane protein KIAA1109 OS=Mus musculus OX=10090 GN=Kiaa1109 PE=1 SV=4	EEISGSSDR	1xTMTpro [N-Term]	23.4886	18	0.004044	18.2	19.2	14.4	14.2	16.6	14.2	10.2	13.2	11.5	14.5	9.5	8.4	3.7	3.8	16.1	13.3	13.4	19.2	13.8	16	14.8	17.3	8.5	10.4	8.4	11	3.9	7.8			10.6	11.7	27.7	23.7	19.3	21.2	22.5	15.8	12.2	17.8	20.3	18.3
High	A2AAE1	Transmembrane protein KIAA1109 OS=Mus musculus OX=10090 GN=Kiaa1109 PE=1 SV=4	EISMSVGLGR	1xTMTpro [N-Term]	57.5132	32	1.703e-05																	54.8	63.8	63.3	65.1	58.3	64.7	49.4	51.7	46.4	55.6	19.9	36.9	14.2	14.1	43.5	47.4
High	A2AAE1	Transmembrane protein KIAA1109 OS=Mus musculus OX=10090 GN=Kiaa1109 PE=1 SV=4	EWFNYVTATR	1xTMTpro [N-Term]	70.9915	25	2.785e-05																																	164.5	160.9	142.5	157.3	169.6	152.7	145.1	156.1	161	154.4
High	A2AAE1	Transmembrane protein KIAA1109 OS=Mus musculus OX=10090 GN=Kiaa1109 PE=1 SV=4	FADGFETSWDDWKPEIR	1xTMTpro [K13]; 1xTMTpro [N-Term]	84.4432	44	8.838e-06	59.9	78.8	86.9	100.9	85.4	101.5	73.2	74.2	75.7	83.2	34.3	40.4	14.3	17.7	75.2	73.5	73.4	82.3	82.6	84.8	83.9	104.4	79.4	91.8	81.3	96.2	34.1	43.7	14.1	14.3	67.4	68.4	69.1	68.1	63.3	80.2	68.3	64.8	58.1	61.5	70.2	56.6
High	A2AAE1	Transmembrane protein KIAA1109 OS=Mus musculus OX=10090 GN=Kiaa1109 PE=1 SV=4	FETGLIELELSNR	1xTMTpro [N-Term]	83.4243	47	8.838e-06																																	61.4	56.2	39.4	50	46.7	36.6	38.9	40.7	45.4	36.6
High	A2AAE1	Transmembrane protein KIAA1109 OS=Mus musculus OX=10090 GN=Kiaa1109 PE=1 SV=4	FIVVTPAFK	1xTMTpro [K9]; 1xTMTpro [N-Term]	85.0082	21	0.0001436																																	57.8	58.1	60.1	57.1	61.6	55.3	52	61.4	61.8	60.2
High	A2AAE1	Transmembrane protein KIAA1109 OS=Mus musculus OX=10090 GN=Kiaa1109 PE=1 SV=4	FTFELPNHR	1xTMTpro [N-Term]	61.4954	74	3.865e-05																	77.1	90.7	94	111.5	107.1	136.4	111.9	110.7	104.5	125.1	58.4	69.6	35.7	43.2	85.1	101.6
High	A2AAE1	Transmembrane protein KIAA1109 OS=Mus musculus OX=10090 GN=Kiaa1109 PE=1 SV=4	GSLNGGNR	1xTMTpro [N-Term]	20.0449	21	0.002403	21.8	32	27.6	37.7	30.7	46.2	33.8	32	40.4	46.8	22.9	25.9	10.4	11.4	33.4	34.5																	28.6	22.1	25.2	29.2	34	27.9	37.5	31.4	34	34.9
High	A2AAE1	Transmembrane protein KIAA1109 OS=Mus musculus OX=10090 GN=Kiaa1109 PE=1 SV=4	GVVEETANNVDAGK	1xTMTpro [K14]; 1xTMTpro [N-Term]	46.0998	54	8.838e-06	57.7	50.5	69.8	88.4	64.7	83.2	61.4	74.4	61.1	74	50.9	52.9	39.6	45	73.1	69.1	52.2	65.6	69.3	75.6	57.4	79.2	70.7	73.6	68.6	67	42	55.2	36.6	38.8	64.4	55.9	80.5	93.6	88.8	99.1	104.6	89.2	83.4	92.9	95	98.3
High	A2AAE1	Transmembrane protein KIAA1109 OS=Mus musculus OX=10090 GN=Kiaa1109 PE=1 SV=4	IGLQPAVLR	1xTMTpro [N-Term]	61.954	15	0.001931	140.9	145.1	168.4	204.9	159.5	185.2	142.7	169.5	147.6	164.8	172.6	192	145.6	165.8	159.7	176.3																	198	201	174.1	194.7	182.9	157.4	169.2	183.2	173	190.5
High	A2AAE1	Transmembrane protein KIAA1109 OS=Mus musculus OX=10090 GN=Kiaa1109 PE=1 SV=4	IGPSQEK	1xTMTpro [K7]; 1xTMTpro [N-Term]	38.4148	10	0.001277	97.6	106.5	129.9	149.4	107.2	143.3	93	123.1	105.8	110.1	74.2	76.9	48.6	52.2	101.9	113.1																	172.9	168.3	149.3	161.3	162	140.2	130.5	158.1	163.6	129
High	A2AAE1	Transmembrane protein KIAA1109 OS=Mus musculus OX=10090 GN=Kiaa1109 PE=1 SV=4	KGLVALAR	1xTMTpro [K1]; 1xTMTpro [N-Term]	50.0187	2	0.002011																																	84.9	96.3	81.1	81.7	84.5	89.4	89.4	113.2	94.7	87.9
High	A2AAE1	Transmembrane protein KIAA1109 OS=Mus musculus OX=10090 GN=Kiaa1109 PE=1 SV=4	KIDPVGVDYILQK	2xTMTpro [K1; K13]; 1xTMTpro [N-Term]	75.2571	23	8.838e-06																	51.1	52.9	68.5	68.7	67.6	92.6	72	90.4	63.2	74.8	41.9	54.5	36.6	33.5	65.5	59.2
High	A2AAE1	Transmembrane protein KIAA1109 OS=Mus musculus OX=10090 GN=Kiaa1109 PE=1 SV=4	LAIDGSDIYIVEHGCATNIK	1xCarbamidomethyl [C15]; 1xTMTpro [K20]; 1xTMTpro [N-Term]	73.6138	45	8.838e-06																	67.2	68.4	80.9	78.4	71.3	92.2	84.4	83.2	73.5	89.8	50.4	60	29.5	37.4	64.1	73.5	114.1	125.1	111.1	110.7	122.5	107.3	119.7	128.5	131.3	127.5
High	A2AAE1	Transmembrane protein KIAA1109 OS=Mus musculus OX=10090 GN=Kiaa1109 PE=1 SV=4	LGASEGTINQEIQR	1xTMTpro [N-Term]	46.6544	66	8.838e-06																	25.4	33.1	35.5	29.6	27.3	36.1	34	33.8	33.3	35.8	25	33.4	27.1	32.1	37.1	29.3
High	A2AAE1	Transmembrane protein KIAA1109 OS=Mus musculus OX=10090 GN=Kiaa1109 PE=1 SV=4	LGTALQDEK	1xTMTpro [K9]; 1xTMTpro [N-Term]	53.9436	13	0.0009794	8.8	12.5	11.8	12.1	12.6	16.7	11.1	15.8	9	13.4	8.4	10.2	8.8	9.7	10.4	11.9	14.1	15.4	12.5	19.6	18.6	20.4	19.7	15.4	11.7	19	10.3	11.2	4.8	6.5	12.8	16.9
High	A2AAE1	Transmembrane protein KIAA1109 OS=Mus musculus OX=10090 GN=Kiaa1109 PE=1 SV=4	LISWTGR	1xTMTpro [N-Term]	60.3189	16	0.002444	238	270.8	315.2	353.6	281.9	335.6	240.2	254.2	257.1	254.2	128.8	140.4	69.1	71.3	236.1	238.4	141	164.9	169.8	168	156.9	203.3	150.5	175	149.2	164.2	63.5	83.1	39.8	41.2	132.4	122.3
High	A2AAE1	Transmembrane protein KIAA1109 OS=Mus musculus OX=10090 GN=Kiaa1109 PE=1 SV=4	LQDLPPCWGLDIVCGK	2xCarbamidomethyl [C7; C14]; 1xTMTpro [K16]; 1xTMTpro [N-Term]	92.0002	27	2.218e-05	11.7	16.2	16.6	18.6	18.7	14.6	9	15.6	15	17.4	12.3	8.9	7.6	6.9	18	15.2	20.6	32.8	25.2	30.4	25.6	32.9	20.4	31.5	29.2	30.6	15.4	17.7	7.3	9.4	20.7	20.4
High	A2AAE1	Transmembrane protein KIAA1109 OS=Mus musculus OX=10090 GN=Kiaa1109 PE=1 SV=4	LSEILAFPR	1xTMTpro [N-Term]	84.0398	20	3.865e-05																																	123.2	119.8	107.5	107.2	104.7	101	96.3	109.6	104.5	87.8
High	A2AAE1	Transmembrane protein KIAA1109 OS=Mus musculus OX=10090 GN=Kiaa1109 PE=1 SV=4	LSVGSNR	1xTMTpro [N-Term]	32.7441	12	0.00151	196.3	215.5	241	283.6	225.9	262.2	198.2	234.8	223.5	219.2	127.8	119.8	58.2	65.1	201	209.9	176.4	216.5	197.6	219.7	194.6	258.6	184.9	205.2	183.3	212.7	85.5	111.2	55.3	62.6	161.2	162.5	263.6	258.6	220.4	252.8	246.2	209.9	208.2	232.1	242.5	220.1
High	A2AAE1	Transmembrane protein KIAA1109 OS=Mus musculus OX=10090 GN=Kiaa1109 PE=1 SV=4	MDTTLINISAVCDIGSASFK	1xCarbamidomethyl [C12]; 1xTMTpro [K20]; 1xTMTpro [N-Term]	92.8218	53	8.838e-06																																	18.4	18.7	21.3	19	16.2	12.6	16.8	19.7	22.6	15.4
High	A2AAE1	Transmembrane protein KIAA1109 OS=Mus musculus OX=10090 GN=Kiaa1109 PE=1 SV=4	NEELNLLR	1xTMTpro [N-Term]	55.4168	20	0.0001066																	193.9	199.2	206.6	265.6	178.3	248.2	178	213.9	182.7	181.6	114.2	133.1	77.3	90	162.9	167.5
High	A2AAE1	Transmembrane protein KIAA1109 OS=Mus musculus OX=10090 GN=Kiaa1109 PE=1 SV=4	QILAFELR	1xTMTpro [N-Term]	72.8812	31	0.0003877																	137.9	152.9	166.9	190.3	168.9	187	157.4	177.9	178.4	185.4	100.9	111.9	67.3	66.8	151.2	154.7
High	A2AAE1	Transmembrane protein KIAA1109 OS=Mus musculus OX=10090 GN=Kiaa1109 PE=1 SV=4	QISDLIR	1xTMTpro [N-Term]	56.2074	28	0.0007854																	27.1	32.7	32.1	37.3	29.5	35.9	32.7	40.7	28.2	35.3	19.5	22.9	13.5	16	25.3	30.8	171.3	183.8	162.9	173.6	180.2	145.8	159.9	158.7	165.1	150.6
High	A2AAE1	Transmembrane protein KIAA1109 OS=Mus musculus OX=10090 GN=Kiaa1109 PE=1 SV=4	RLWFLWPDDTLK	1xTMTpro [K12]; 1xTMTpro [N-Term]	93.0178	26	2.218e-05	26.8	30.3	34.7	42	33.7	43.7	22.4	32.6	27.1	33.5	17.5	15.4	11.5	14.6	26.8	26.9	35	41.4	40.7	41	42.6	40.7	37.5	40.8	40.7	34.5	18.2	26.9	12.6	11.9	42.4	36.5	51.8	68.2	47.2	54	53.5	47.5	48.1	54.8	43.6	51.2
High	A2AAE1	Transmembrane protein KIAA1109 OS=Mus musculus OX=10090 GN=Kiaa1109 PE=1 SV=4	SLSGTATER	1xTMTpro [N-Term]	26.1261	40	2.218e-05	185.9	185.9	217.1	266.3	201.2	237.6	182.9	198.6	213.9	188.3	108.4	107.7	38	53.1	180.2	174.3	126.7	140.1	145.4	164.5	142.4	193.6	137.8	163.3	141.3	155.6	59.8	80.5	29	34.2	124.3	115.9	279.1	236.2	237.3	259.8	249.9	223.3	205.5	239.7	232.2	210.6
High	A2AAE1	Transmembrane protein KIAA1109 OS=Mus musculus OX=10090 GN=Kiaa1109 PE=1 SV=4	SPTEPTCR	1xCarbamidomethyl [C7]; 1xTMTpro [N-Term]	22.411	11	0.003851	73.2	100.7	112.6	142.8	103.2	142.3	105.3	114	108.4	131.9	56.6	62.4	21.6	21	101.4	105.3	57.6	56.7	72.5	78.1	67.4	98.5	71.1	91.3	70.7	85.6	27.8	39.5	13.5	12.5	53.4	61.4	109.2	118.9	123.2	113.8	128.2	119	123.7	127.8	139.3	109.2
High	A2AAE1	Transmembrane protein KIAA1109 OS=Mus musculus OX=10090 GN=Kiaa1109 PE=1 SV=4	SQALYSAQR	1xTMTpro [N-Term]	32.5457	33	2.785e-05	22.7	26.3	23.7	31.7	27	35.3	22.3	23	24.2	21.4	12.1	9.1	4.8	3.5	18.8	22.9	36.4	36.4	37.9	42.4	39.8	60.6	42.9	49.6	39.6	40.5	16.5	16.5	2.7	9.7	34.2	35.2	78.4	80.2	66.1	73.3	78.1	61.8	60.9	69.1	68.1	67.5
High	A2AAE1	Transmembrane protein KIAA1109 OS=Mus musculus OX=10090 GN=Kiaa1109 PE=1 SV=4	SSLNKLETEGTLR	1xTMTpro [K5]; 1xTMTpro [N-Term]	50.8111	9	8.838e-06																	225.4	244	250.7	273.5	232.3	325.9	250.2	298	247.8	254.3	145.3	169	99.8	111.7	217.4	213.1	428.2	458.4	397.4	440	424.2	388.1	412	455.7	413.5	405.4
High	A2AAE1	Transmembrane protein KIAA1109 OS=Mus musculus OX=10090 GN=Kiaa1109 PE=1 SV=4	SVSDSSVPRR	1xTMTpro [N-Term]	23.521	4	0.002302	24.3	31.7	38.7	47.6	37.4	51.5	35.5	38.7	42.2	43.7	56.9	60.2	53.4	61.7	41.2	48.9
High	A2AAE1	Transmembrane protein KIAA1109 OS=Mus musculus OX=10090 GN=Kiaa1109 PE=1 SV=4	TTFSENLSPK	1xTMTpro [K10]; 1xTMTpro [N-Term]	53.5025	42	5.039e-05	51.1	50	58.4	65.3	58.3	62.6	53.9	58.7	50.3	51	33.8	34.9	25.3	31.6	52.3	54.5
High	A2AAE1	Transmembrane protein KIAA1109 OS=Mus musculus OX=10090 GN=Kiaa1109 PE=1 SV=4	VDAASPGPR	1xTMTpro [N-Term]	27.5713	16	9.049e-05	152.7	156.8	171.8	219.6	178.4	199.4	161.5	187.2	148.1	191.1	91.7	79.2	42.9	45.8	164.8	179																	135.8	99.9	123	135.3	132.4	115.1	101.3	108	115.3	99.9
High	A2AAE1	Transmembrane protein KIAA1109 OS=Mus musculus OX=10090 GN=Kiaa1109 PE=1 SV=4	VLSVLIK	1xTMTpro [K7]; 1xTMTpro [N-Term]	84.8367	30	0.0002829	68.6	71.4	95.3	98.2	101.9	113.9	79.6	108	68.8	97.8	60.4	52	33.9	44.5	84.3	98.2																	211.7	191.5	183.6	218.7	203.2	176.6	160.1	202.6	190.3	174.5
High	A2AAE1	Transmembrane protein KIAA1109 OS=Mus musculus OX=10090 GN=Kiaa1109 PE=1 SV=4	YSLFMLVK	1xTMTpro [K8]; 1xTMTpro [N-Term]	93.079	23	0.001251																	20.3	21.4	21.6	21	24.3	24.1	25.2	25.7	21.9	24.1	9.7	14.6	6.7	8.6	14.9	19.7
High	A2AAY5	SH3 and PX domain-containing protein 2B OS=Mus musculus OX=10090 GN=Sh3pxd2b PE=1 SV=1	AASFLNADGPK	1xTMTpro [K11]; 1xTMTpro [N-Term]	59.1453	24	2.785e-05																	18.7	21.1	16	21.6	19	18.3	15.5	16.5	13.6	16.7	20.8	27.4	23.7	28.2	25.6	23.2	32.5	36.7	33.9	38.1	25.5	26.3	18.7	26.3	23.5	22.5
High	A2AAY5	SH3 and PX domain-containing protein 2B OS=Mus musculus OX=10090 GN=Sh3pxd2b PE=1 SV=1	LIPIDEYCK	1xCarbamidomethyl [C8]; 1xTMTpro [K9]; 1xTMTpro [N-Term]	71.2951	23	0.0001745	78.5	96.2	91.9	110.4	72.1	94.7	53.7	74.1	56	61.7	100.6	110.2	117.9	129.3	87.6	90.3	76.6	97.4	74.9	85.9	67.1	82.7	57.5	55.6	50.4	50.2	101.5	100.4	85.2	101.1	87.6	84	141.7	149	104.1	114.6	86	79.3	67.2	72.4	77.2	78.2
High	A2AB59	Rho GTPase-activating protein 27 OS=Mus musculus OX=10090 GN=Arhgap27 PE=1 SV=1	GLDIDGLYR	1xTMTpro [N-Term]	63.1414	39	0.0001094	11.5	9.5	14.4	14.5	15.8	17.8	10.2	15.9	10.5	10.1	13.2	9.5	10.9	12.7	13.7	14.6	28.2	30.6	37.1	36.6	34.4	38.9	36.5	37.5	33.1	28.9	24.9	25.6	27	30.5	34.1	39.5	62.7	59.1	59.5	58.5	71.2	64.1	63.9	71.8	47.2	47.9
High	A2AB59	Rho GTPase-activating protein 27 OS=Mus musculus OX=10090 GN=Arhgap27 PE=1 SV=1	IAIQPNER	1xTMTpro [N-Term]	41.6572	6	0.003147																	42.3	44.8	40.1	52	44.1	52.5	50.7	39.4	43.1	34.9	46	55.1	56.4	77	44.9	63.4
High	A2AB59	Rho GTPase-activating protein 27 OS=Mus musculus OX=10090 GN=Arhgap27 PE=1 SV=1	LGSWREEDVR	1xTMTpro [N-Term]	44.7187	12	0.0008459	77.2	89.6	108	124.5	117.5	117.5	104.4	127.2	101.8	123.7	116.8	120.5	121.2	146.9	118.2	116.9
High	A2AB59	Rho GTPase-activating protein 27 OS=Mus musculus OX=10090 GN=Arhgap27 PE=1 SV=1	LQDPAQR	1xTMTpro [N-Term]	30.8624	8	0.00429																	125.7	129.2	113.7	106.6	101.4	106	89.8	95.1	86.8	63.5	59.4	65.9	61.7	57.7	97.8	98	143.9	126.8	124.2	104.7	110.7	83.5	93.4	82.4	92.5	86.5
High	A2AB59	Rho GTPase-activating protein 27 OS=Mus musculus OX=10090 GN=Arhgap27 PE=1 SV=1	RPTLQSLR	1xTMTpro [N-Term]	35.4759	27	0.0006377																																	507.9	472.9	346.5	353.2	269.2	238	210.8	237.7	186.3	173.3
High	A2AB59	Rho GTPase-activating protein 27 OS=Mus musculus OX=10090 GN=Arhgap27 PE=1 SV=1	VIEHGEQNR	1xTMTpro [N-Term]	22.9292	31	0.0001938																																	32	24.8	30.5	25.6	30.9	23.3	26	25.8	24.3	24.8
High	A2ABV5	Mediator of RNA polymerase II transcription subunit 14 OS=Mus musculus OX=10090 GN=Med14 PE=1 SV=1	FLGSVIMR	1xTMTpro [N-Term]	73.2487	14	0.00226																																	14.3	13	20.9	18.2	22.2	18.4	16.2	28.4	50.6	37.8
High	A2ABV5	Mediator of RNA polymerase II transcription subunit 14 OS=Mus musculus OX=10090 GN=Med14 PE=1 SV=1	SLLDCTFR	1xCarbamidomethyl [C5]; 1xTMTpro [N-Term]	60.9693	28	5.606e-05	16.6	14.8	20.3	27	25.3	31.3	30.3	37.1	57.1	55.9	205.6	203.8	166.4	178.4	69.2	77.4	10.6	11.2	13.7	10.9	18	22	19.4	23.5	44.2	34.9	133.3	113.3	96.2	88.3	50.6	49.5	25.1	18.7	25.2	25.9	33.6	31.5	41.3	41.3	86.4	67.9
High	A2ACP1	Tetratricopeptide repeat protein 39A OS=Mus musculus OX=10090 GN=Ttc39a PE=2 SV=1	HFEGGVK	1xTMTpro [K7]; 1xTMTpro [N-Term]	35.143	23	0.0004495																	58.1	63	64.5	69	54.1	72.5	63.8	59.4	63.7	57.4	80.7	90.1	68.3	75.6	69.2	73.1
High	A2ACP1	Tetratricopeptide repeat protein 39A OS=Mus musculus OX=10090 GN=Ttc39a PE=2 SV=1	LLEFVGFSGNK	1xTMTpro [K11]; 1xTMTpro [N-Term]	89.492	30	8.042e-05	12.9	12.8	11.3	17	17.3	12	7.4	11.7	12.9	11.8	20	16.9	10.9	21.3	15.2	17.5
High	A2ACP1	Tetratricopeptide repeat protein 39A OS=Mus musculus OX=10090 GN=Ttc39a PE=2 SV=1	SLVSSVSL	1xTMTpro [N-Term]	71.4157	19	0.001319	7.6	6.7	8.2	12.1	12	14.7	9.9	16.5	11.2	14.2	17.2	12	9.9	12.1	13.9	12.2																	13.7	13.3	13.9	10.2	14.3	10	16.3	12.2	12.3	6.6
High	A2ACP1	Tetratricopeptide repeat protein 39A OS=Mus musculus OX=10090 GN=Ttc39a PE=2 SV=1	SSLEDGNR	1xTMTpro [N-Term]	23.0526	37	0.0004657																	33.3	33.5	32.9	28.4	28.7	37.5	33.9	34.6	40.2	30.4	43.6	48.3	37.3	37	39.4	45.7	50.3	36.6	34.6	32.9	46	36	33.2	36.1	49.7	42.8
High	A2ADY9	Protein DDI1 homolog 2 OS=Mus musculus OX=10090 GN=Ddi2 PE=1 SV=1	IDFSSIAVPGTSNPQQR	1xTMTpro [N-Term]	69.1778	51	8.838e-06	90.5	103.1	110.6	143.6	120.4	130.9	94.5	100.2	108.4	98.2	105.3	119.6	102.5	129.2	122.6	127.7	91.2	111.5	104.8	126.5	100.9	134.4	110.3	133	111.2	102.5	96	103.3	105.6	108.5	104	118.1	148.4	123.3	127.8	126.3	129	129.7	120.8	134.7	117	115.7
High	A2ADY9	Protein DDI1 homolog 2 OS=Mus musculus OX=10090 GN=Ddi2 PE=1 SV=1	LFSADPFDLEAQAK	1xTMTpro [K14]; 1xTMTpro [N-Term]	90.1162	59	8.838e-06	128.3	122.5	144.8	160	156.4	175.2	149.9	165.8	99.8	104.5	89.9	89.9	77.6	108.7	134.9	144.6
High	A2ADY9	Protein DDI1 homolog 2 OS=Mus musculus OX=10090 GN=Ddi2 PE=1 SV=1	SLASYGLK	1xTMTpro [K8]; 1xTMTpro [N-Term]	57.2566	27	6.035e-05	81	124.6	89	100.1	105.6	105.8	97.8	116.3	55.6	80.8	40.1	41.5	40.4	44.6	83.7	90.2	93.6	204.4	97.1	166.5	123.1	164.2	130.8	158	75.4	103.8	41.9	53.2	51.7	59.6	98.1	91.4
High	A2ADY9	Protein DDI1 homolog 2 OS=Mus musculus OX=10090 GN=Ddi2 PE=1 SV=1	VLVEQQQDR	1xTMTpro [N-Term]	36.5056	27	5.039e-05	282.3	310.6	341.5	372.3	414.5	408.2	363.6	415.9	249.8	258.8	221.2	237.8	221.4	307.5	326.5	371.1	231.3	367.8	259	397	286.6	442.9	355	426.2	246.8	273.5	190.7	223.9	218.1	273.4	268.4	282.3	418.2	364.9	386.5	359.4	414	391	370.1	439.4	285.2	307.4
High	A2ADY9	Protein DDI1 homolog 2 OS=Mus musculus OX=10090 GN=Ddi2 PE=1 SV=1	VNGHPVK	1xDeamidated [N2]; 1xTMTpro [K7]; 1xTMTpro [N-Term]	31.6066	19	0.002029																	247.8	397.9	264	427.8	308.3	470.7	401.9	496.7	297.8	302.7	223.4	240.5	291.7	304.1	316.3	342
High	A2ADY9	Protein DDI1 homolog 2 OS=Mus musculus OX=10090 GN=Ddi2 PE=1 SV=1	VNGHPVK	1xTMTpro [K7]; 1xTMTpro [N-Term]	29.1406	14	0.003272																	135.1	176.3	131.1	196.1	154.5	222.7	172.4	200.1	137	148.5	169.6	210.3	170	179.2	153.8	170.5	176.9	180.3	167.4	172	194.2	177.6	192	217.7	137.4	148.7
High	A2AF47	Dedicator of cytokinesis protein 11 OS=Mus musculus OX=10090 GN=Dock11 PE=1 SV=1	CLTLMDR	1xCarbamidomethyl [C1]; 1xTMTpro [N-Term]	52.2628	0	0.003807																																	126.3	110.5	136.2	122.8	165.8	105.8	118.9	139.5	139.1	115.1
High	A2AF47	Dedicator of cytokinesis protein 11 OS=Mus musculus OX=10090 GN=Dock11 PE=1 SV=1	DVQGSLDLDGR	1xTMTpro [N-Term]	45.5784	8	0.004981																	50	57.9	59.6	64.2	63.3	82.5	69.6	69.1	79.9	64.7	114.7	107.3	99	111.9	81.8	82.8
High	A2AF47	Dedicator of cytokinesis protein 11 OS=Mus musculus OX=10090 GN=Dock11 PE=1 SV=1	KQDTVETPVGFAWVPLLK	2xTMTpro [K1; K18]; 1xTMTpro [N-Term]	96.8716	39	8.838e-06	5.9	6.6	10.6	10.4	14.2	15.8	7.3	10	7.2	8.3	14.1	17.4	10.8	17	16.2	10.2																	15.2	12.1	14.6	15.6	19.1	13.5	10.2	17.6	18.3	17.8
High	A2AF47	Dedicator of cytokinesis protein 11 OS=Mus musculus OX=10090 GN=Dock11 PE=1 SV=1	LFPSGCSAFK	1xCarbamidomethyl [C6]; 1xTMTpro [K10]; 1xTMTpro [N-Term]	69.533	33	2.218e-05																	58.2	65.1	70.2	68.6	72.3	84.3	65.1	69.7	69.9	69.1	81.8	101.8	80.9	91.8	78.8	75	108.6	98.1	109.6	110.8	116	97.4	91.6	114.4	104.4	104
High	A2AF47	Dedicator of cytokinesis protein 11 OS=Mus musculus OX=10090 GN=Dock11 PE=1 SV=1	LIKEDQIEYHEGLK	2xTMTpro [K3; K14]; 1xTMTpro [N-Term]	57.1775	17	0.0004173																	219	232.6	252.7	271.5	249.8	318.6	277.6	271.5	253.8	242.8	309.4	343	285.9	333.1	305.9	308.9
High	A2AF47	Dedicator of cytokinesis protein 11 OS=Mus musculus OX=10090 GN=Dock11 PE=1 SV=1	LLGTFFR	1xTMTpro [N-Term]	83.4473	17	0.001325	76.6	88.4	98.4	108.1	73.9	96.8	71	82.3	83.5	92.5	142.6	162.6	114	169.2	107.9	108.7	105.1	118.2	113.5	137.4	125.7	137	120.1	120	131.4	118.8	179.8	206.8	177.1	211.1	145.7	148.4	157.4	153.5	145.7	172.1	155.3	136.1	133.4	152.3	159.4	158.5
High	A2AF47	Dedicator of cytokinesis protein 11 OS=Mus musculus OX=10090 GN=Dock11 PE=1 SV=1	LTGLSEISLR	1xTMTpro [N-Term]	69.9898	54	1.703e-05																	18.6	15.2	20.8	24.6	21.3	28.4	19.5	20.7	22	18.8	27.5	25.6	21.5	26.9	20.6	24.6
High	A2AF47	Dedicator of cytokinesis protein 11 OS=Mus musculus OX=10090 GN=Dock11 PE=1 SV=1	LVEPLDYENVITQR	1xTMTpro [N-Term]	75.0313	41	8.838e-06	62	78.8	94	101.9	85.6	99.2	78.2	92.6	85.4	84	114.8	145.9	110.2	145.1	107.6	116.9
High	A2AF47	Dedicator of cytokinesis protein 11 OS=Mus musculus OX=10090 GN=Dock11 PE=1 SV=1	QSVSEAVR	1xTMTpro [N-Term]	27.0579	13	0.0001612	120.3	134.6	156	207.1	157.2	188.5	131.7	161.1	167.7	167.3	285.5	317.7	265.6	328.1	206.2	199.1	119.2	122	133.1	136.7	143.2	168.7	141.4	144.9	161.4	153.7	270	281.4	253.3	275.8	180.8	191.9	124.4	118.5	120.2	121.3	124.2	113.7	116.4	121.5	134.5	122.9
High	A2AF47	Dedicator of cytokinesis protein 11 OS=Mus musculus OX=10090 GN=Dock11 PE=1 SV=1	TVQSTVPEDAEKR	1xTMTpro [K12]; 1xTMTpro [N-Term]	36.061	24	8.838e-06	122	132.4	162	217.3	177	215.9	151.5	171.2	136	176.8	181.8	224.5	160.9	232.8	188	183
High	A2AF47	Dedicator of cytokinesis protein 11 OS=Mus musculus OX=10090 GN=Dock11 PE=1 SV=1	VFDIHLAFLK	1xTMTpro [K10]; 1xTMTpro [N-Term]	91.6004	28	0.0001286	5.4	12.4	13.8	13.2	12.9	16	9.3	11.4	11.5	16.6	21.5	27.9	14.5	26.2	15.8	15.5
High	A2AF47	Dedicator of cytokinesis protein 11 OS=Mus musculus OX=10090 GN=Dock11 PE=1 SV=1	YEVISEISK	1xTMTpro [K9]; 1xTMTpro [N-Term]	65.3454	22	0.0001938																	47.3	61.5	54.8	58.1	52.8	69.8	53.7	59.8	61.5	57.1	66.5	78.1	66.6	65.4	64.2	65.2
High	A2AFR3	FERM and PDZ domain-containing protein 4 OS=Mus musculus OX=10090 GN=Frmpd4 PE=1 SV=1	AGTVSSR	1xTMTpro [N-Term]	18.6178	22	0.001248																	58.3	59.4	49.8	58.8	53.2	59	53.2	67	52.2	42.7	34.9	33.7	35.5	47.9	57.4	53.7	113.7	98.8	114.7	104.9	119.5	96.6	108.6	106	73.8	90.3
High	A2AFR3	FERM and PDZ domain-containing protein 4 OS=Mus musculus OX=10090 GN=Frmpd4 PE=1 SV=1	FDCSTSIKDVILTLQEK	1xCarbamidomethyl [C3]; 2xTMTpro [K8; K17]; 1xTMTpro [N-Term]	94.7181	22	8.838e-06	15.4	21.6	23.3	24.7	22	32.2	19.7	25.3	20.5	23	19.7	24.2	14.9	17.5	26.4	23.1	28.8	34.3	33.6	37.3	28.4	45.1	45.7	41.7	48.5	50	47.5	55.3	35.8	32.8	38.7	43.4	32.4	28.1	26.6	33.7	40.8	27.4	30.5	36.3	28.9	30
High	A2AFR3	FERM and PDZ domain-containing protein 4 OS=Mus musculus OX=10090 GN=Frmpd4 PE=1 SV=1	GPGLGNR	1xTMTpro [N-Term]	25.5525	9	0.005632	140.7	131.7	140.3	152.2	141.1	136.3	126.5	135.3	77.5	80.9	72.2	65.1	66	92.8	118.6	118.7	112.9	112.5	105.6	124.3	94.1	124	115.2	119.4	87.1	85.8	55.2	65.6	66.4	77.6	97.8	94.6	200.3	157.8	165.4	179.8	166.5	159.3	139	165.8	121	131
High	A2AFR3	FERM and PDZ domain-containing protein 4 OS=Mus musculus OX=10090 GN=Frmpd4 PE=1 SV=1	QSESLSR	1xTMTpro [N-Term]	21.5375	18	0.00038	62.5	61.5	73.4	70.1	82.4	84.1	68.9	74.3	42.8	43.2	42	37.2	42.5	58.2	54.5	67.4	39.8	48.8	48.4	55.2	50.2	56.5	55.7	58.1	43.8	40.3	43.9	46.4	49.7	54.4	50.7	57.7	58.9	50.4	44.8	46.2	55.7	48.5	46.9	54.8	43.1	47.4
High	A2AFR3	FERM and PDZ domain-containing protein 4 OS=Mus musculus OX=10090 GN=Frmpd4 PE=1 SV=1	SEVTLLVGPR	1xTMTpro [N-Term]	61.4496	18	0.000836	19.5	21.3	21.2	24.2	21.2	22.2	19.4	20	14.3	19.9	14.7	18.7	12.5	19.8	18.4	18																	59.3	59.2	58.2	59.3	69.5	58.3	56.9	63.5	58.9	53.5
High	A2AFR3	FERM and PDZ domain-containing protein 4 OS=Mus musculus OX=10090 GN=Frmpd4 PE=1 SV=1	VYLENGQTK	1xTMTpro [K9]; 1xTMTpro [N-Term]	46.8496	12	0.0005356																																	69.2	78.2	60.1	57.9	73	59.1	67.6	72.4	65.7	62.2
High	A2AFS3	UPF0577 protein KIAA1324 OS=Mus musculus OX=10090 GN=Kiaa1324 PE=1 SV=1	AAPGTLR	1xTMTpro [N-Term]	29.2305	15	0.002714	104.2	122.8	278.2	261.2	466.9	418.1	529.2	479.4	767.7	657.8	340.3	365.9	101.7	111.6	370.8	422.4	65.9	94	168.4	198.6	336.2	434.3	444.7	484.9	627	614.1	288.7	321.3	84	79.6	304	298.4	116.8	166.6	212.9	265	426.9	366.7	500.3	500.2	757.9	678.6
High	A2AFS3	UPF0577 protein KIAA1324 OS=Mus musculus OX=10090 GN=Kiaa1324 PE=1 SV=1	AGVSSQPVSLADR	1xTMTpro [N-Term]	42.3106	39	8.838e-06	57.8	62.7	139.1	134.3	243.7	206.6	279.2	251.8	383.4	371.5	241.2	244.8	99.2	130.2	211.9	219.2	53.3	75.1	99.5	132.1	194.9	241.2	247.7	292.4	346.8	385.1	184.2	220.5	69	90.7	169.2	178.4	93.3	135.4	168.3	228.9	346.3	286.2	397.3	379.4	627.1	600
High	A2AFS3	UPF0577 protein KIAA1324 OS=Mus musculus OX=10090 GN=Kiaa1324 PE=1 SV=1	AHQPYGAQACVPCGPGTK	2xCarbamidomethyl [C10; C13]; 1xTMTpro [K18]; 1xTMTpro [N-Term]	40.0841	37	8.838e-06																	69.7	78.8	84.5	109.5	119.5	146.1	146.8	163.3	208.9	201.1	129.8	154.7	80.4	87.3	134.5	138.8	90.1	101	113.1	132.2	176.1	131.4	174.8	200.7	273.8	249.1
High	A2AFS3	UPF0577 protein KIAA1324 OS=Mus musculus OX=10090 GN=Kiaa1324 PE=1 SV=1	GNNVLYWR	1xTMTpro [N-Term]	55.9711	14	0.0007832	112.8	116.4	228	230.2	314.2	301.3	335.3	351.3	475.6	466.2	299.8	322.2	102	135.5	279.9	312.1	99.7	133.4	176.1	206.4	262.9	313.6	336.7	337.9	448	450.1	254.6	293.8	114.2	121.5	244.5	265.4	232	298.8	323.9	418.5	606.1	484.6	715.3	665.6	1009.8	858.9
High	A2AFS3	UPF0577 protein KIAA1324 OS=Mus musculus OX=10090 GN=Kiaa1324 PE=1 SV=1	ICGEDLEGAVKLPASGVK	1xCarbamidomethyl [C2]; 2xTMTpro [K11; K18]; 1xTMTpro [N-Term]	70.1364	39	8.838e-06	54.4	66	91.7	112.2	118.9	148.2	122.1	103	174.1	128.8	100.6	139.1	67.4	96.7	120.1	109.5
High	A2AFS3	UPF0577 protein KIAA1324 OS=Mus musculus OX=10090 GN=Kiaa1324 PE=1 SV=1	LCSGGISLPEQR	1xCarbamidomethyl [C2]; 1xTMTpro [N-Term]	55.1191	45	8.838e-06	122.6	148	140.6	172.8	151.1	156	118.2	137.4	148.7	152	96	103.3	65.1	77.8	136.4	141.5	193.2	312.2	184.3	292.9	231.2	288.9	234.5	273.4	215.6	271.3	136.9	198.7	104	137.2	199.1	213.6
High	A2AFS3	UPF0577 protein KIAA1324 OS=Mus musculus OX=10090 GN=Kiaa1324 PE=1 SV=1	LPASGVK	1xTMTpro [K7]; 1xTMTpro [N-Term]	46.1094	11	0.001798																	298.6	391	357.8	432.5	486.3	623.2	541.5	642.8	744.3	805.9	478	585.7	288.1	346.2	485.3	486.1	467.2	483.5	451.5	540.1	673.9	559.4	655	674.5	968	831.3
High	A2AFS3	UPF0577 protein KIAA1324 OS=Mus musculus OX=10090 GN=Kiaa1324 PE=1 SV=1	QGSPFCK	1xCarbamidomethyl [C6]; 1xTMTpro [K7]; 1xTMTpro [N-Term]	45.1823	18	0.0004495	51.3	58.3	100.2	108	156.9	154.7	176.2	160	232.4	184.3	127.9	128.3	63.8	70.6	127.6	135.9																	239.9	265.2	195.5	232.7	260.6	250.6	296.9	327.6	470	413.8
High	A2AFS3	UPF0577 protein KIAA1324 OS=Mus musculus OX=10090 GN=Kiaa1324 PE=1 SV=1	SNDVTQSCSSGR	1xCarbamidomethyl [C8]; 1xTMTpro [N-Term]	19.0117	26	8.838e-06	24	26.9	51.7	54.3	90	70.7	97.1	82.8	126.3	106.6	65.6	81.1	30.2	31.9	79.5	79	10.6	11	24.5	35.2	49.6	62.2	61.8	72	92.7	80.8	39.1	46.3	15.4	11.1	43.9	42.1	28.3	34.8	58.4	61.3	84	73.1	102.7	90.1	133.3	112.3
High	A2AFS3	UPF0577 protein KIAA1324 OS=Mus musculus OX=10090 GN=Kiaa1324 PE=1 SV=1	TIDFWLK	1xTMTpro [K7]; 1xTMTpro [N-Term]	84.0771	25	0.0004937																	50.5	58.2	87.9	94.6	133.3	159	156.6	185.7	217.4	242.2	116.6	153.4	57.9	53.1	129.8	137
High	A2AFS3	UPF0577 protein KIAA1324 OS=Mus musculus OX=10090 GN=Kiaa1324 PE=1 SV=1	TTAFSVWSK	1xTMTpro [K9]; 1xTMTpro [N-Term]	67.4958	22	0.0001388	39.8	40.9	64.2	73.4	75	80.5	75.1	92.5	98.8	101.3	68.4	67	35.4	39.9	65.9	75.7	49.2	54.7	75	104.3	119.2	155.1	137	193.5	210.1	199.6	107.5	112.8	41.4	39.3	118.8	106.1	76.2	89.9	83.7	127.6	131.9	131.5	169	158	228.5	183
High	A2AFS3	UPF0577 protein KIAA1324 OS=Mus musculus OX=10090 GN=Kiaa1324 PE=1 SV=1	YSLGTGIR	1xTMTpro [N-Term]	47.0818	22	0.0006252																	93.4	122.1	165.9	243.2	335.7	382	367.9	423.2	538.7	590	271.2	333.4	114.4	147.8	278.8	284.4	79.4	88.9	126.4	170.3	250.2	208.5	230.3	255.5	426.9	362
High	A2AG50	MAP7 domain-containing protein 2 OS=Mus musculus OX=10090 GN=Map7d2 PE=1 SV=1	AAPETFPQDIFSTGLKPVGGPVHLDVLDGK	2xTMTpro [K16; K30]; 1xTMTpro [N-Term]	93.5931	43	8.838e-06	36	40.3	59.9	59.7	67.9	68.6	65.7	89.8	80.9	106.5	256.4	197.1	245.2	275.7	123.3	132.8	32.9	37.9	37.2	54	58.2	57.6	67.5	65.5	85.7	67	147.6	151.9	156.8	177.9	98.6	98.8	57.2	55.7	70.2	77.1	98.1	91.3	91.3	115.9	180.2	151.6
High	A2AG50	MAP7 domain-containing protein 2 OS=Mus musculus OX=10090 GN=Map7d2 PE=1 SV=1	AAVEEKR	1xTMTpro [K6]; 1xTMTpro [N-Term]	27.5523	4	0.001333	168.7	186.3	274.4	293.9	287.6	342	307.8	320.6	467.7	442.2	1224.2	1347.1	1223	1411.6	600.6	627.7	155.4	152.7	200.9	171	225.3	253.1	283.6	256.5	383.5	283	750	747.5	795.7	718.1	415.2	431.1
High	A2AG50	MAP7 domain-containing protein 2 OS=Mus musculus OX=10090 GN=Map7d2 PE=1 SV=1	ALGSPLK	1xTMTpro [K7]; 1xTMTpro [N-Term]	51.2675	26	0.001546																																	450.6	431.7	415.4	420.9	564.1	450.4	553.7	586.5	856.8	703.4
High	A2AG50	MAP7 domain-containing protein 2 OS=Mus musculus OX=10090 GN=Map7d2 PE=1 SV=1	ALQDILDFTGPPAFPK	1xTMTpro [K16]; 1xTMTpro [N-Term]	97.9137	45	8.838e-06																	147.7	146.4	150.7	156.1	149.2	181.3	193.9	168.5	256.3	191.5	386.1	380.3	422.5	434	277	266.8	114.1	112.4	103.5	112.4	120.2	100.6	113.1	118.7	151.7	146
High	A2AG50	MAP7 domain-containing protein 2 OS=Mus musculus OX=10090 GN=Map7d2 PE=1 SV=1	ALQDILDFTGPPAFPKK	2xTMTpro [K16; K17]; 1xTMTpro [N-Term]	94.9069	46	8.838e-06	64.7	79.8	80.2	91.9	87.8	117.5	83.1	92.8	105.9	95.3	155	205.9	167.1	225.6	119.1	106.9	7.3	6.4	12	9.4	8.7	15.2	20.2	16.7	39.9	19	72.2	58.3	61.8	51.7	34	32.1	9.4	16.5	11.6	12	15.3	10	29.7	18.4	36.3	24.4
High	A2AG50	MAP7 domain-containing protein 2 OS=Mus musculus OX=10090 GN=Map7d2 PE=1 SV=1	ASQSTPR	1xTMTpro [N-Term]	16.6045	19	0.0005476	109.5	128.8	160.4	175.4	181	194.7	196.6	193.8	270.8	262.6	754	716.3	777.5	804.7	358.3	368.9	291	280.1	339.1	321.3	405.7	420.1	530.1	454.4	770.6	546.6	1710.1	1494.7	1767.3	1597.9	846.9	839.3	312.3	284.4	313.2	284	436.5	324.9	439	456.7	748.7	633.4
High	A2AG50	MAP7 domain-containing protein 2 OS=Mus musculus OX=10090 GN=Map7d2 PE=1 SV=1	ASQSTPR	1xDeamidated [Q3]; 1xTMTpro [N-Term]	18.2207	24	0.0009271	12.7	11.5	20.1	20.7	19.8	27.2	21.1	19.6	28.6	25.5	80.4	77.7	77.9	94.6	38.2	38.7																	23.5	18	18.2	18.6	17.2	16	26.9	21.6	41.1	29.2
High	A2AG50	MAP7 domain-containing protein 2 OS=Mus musculus OX=10090 GN=Map7d2 PE=1 SV=1	CEPPEDISK	1xCarbamidomethyl [C1]; 1xTMTpro [K9]; 1xTMTpro [N-Term]	38.6307	25	0.001132	10.8	15.1	18.4	19.4	19.8	23.5	18.5	16.2	29.8	26.7	62.7	50.5	61.2	82.7	33.5	36.5	16.2	10.9	14.1	20.2	12.8	21.9	26.6	19	39.5	18.6	67.8	39.4	52	53	25.5	28.3	15.9	19.8	21.1	16.8	17.9	20.7	22.6	27.9	34.2	32.1
High	A2AG50	MAP7 domain-containing protein 2 OS=Mus musculus OX=10090 GN=Map7d2 PE=1 SV=1	EGAPGQQSTVLPR	1xTMTpro [N-Term]	33.2267	57	8.838e-06	125.2	123.1	156.6	178.7	203.5	229.4	193.9	235.2	226.8	268.3	624.8	471.4	603.2	621.6	315.6	344.3	87.2	110.4	93.9	118.9	146.1	140.7	169	127.5	224.3	178.5	379.9	372.9	404.6	419	231.5	234	114.4	94.1	127.1	128.4	181	151.1	128.4	179.9	266.9	230.3
High	A2AG50	MAP7 domain-containing protein 2 OS=Mus musculus OX=10090 GN=Map7d2 PE=1 SV=1	EKAEEELLSK	2xTMTpro [K2; K10]; 1xTMTpro [N-Term]	54.6406	14	8.838e-06																																	141.8	126.3	149.7	176.7	220.3	176.7	186.5	233.9	309.3	272.1
High	A2AG50	MAP7 domain-containing protein 2 OS=Mus musculus OX=10090 GN=Map7d2 PE=1 SV=1	EKEGAPGQQSTVLPR	1xTMTpro [K2]; 1xTMTpro [N-Term]	39.4666	34	8.838e-06																	67.3	84	90.2	99.5	114.2	120.9	151.3	114	161.2	138	292.3	282.9	316.4	324.7	222.3	204.6
High	A2AG50	MAP7 domain-containing protein 2 OS=Mus musculus OX=10090 GN=Map7d2 PE=1 SV=1	EQEEQERLEKEER	1xTMTpro [K10]; 1xTMTpro [N-Term]	30.0936	2	0.0004657	34.1	30.9	55.5	53.4	59	60	53.3	74.8	66.5	108	242.4	179.6	227.2	286.7	108.1	124.4	24.8	32.8	30.8	35.8	43.5	49.2	45.8	46.4	79.3	54.9	107.6	98.4	110	112.5	74.7	69.8
High	A2AG50	MAP7 domain-containing protein 2 OS=Mus musculus OX=10090 GN=Map7d2 PE=1 SV=1	EQIMLQIEQER	1xTMTpro [N-Term]	62.8537	39	8.838e-06	92.2	100.7	115.6	136.4	128	129.9	120.6	153.7	153.2	180.2	421.9	332.8	421.1	455.4	223	229.1																	142.7	109.8	139.6	154.9	190.6	162.4	143.9	179.9	294.6	257.5
High	A2AG50	MAP7 domain-containing protein 2 OS=Mus musculus OX=10090 GN=Map7d2 PE=1 SV=1	EQIMLQIEQERLER	1xTMTpro [N-Term]	63.9954	31	8.838e-06	13.5	20.3	20.2	26.5	19.8	22.3	25.9	17.4	24.7	22.8	66.2	47	54.4	65.1	23.7	31	60	71.9	74.6	74	93.3	96.4	128.4	107.1	148.2	120.9	362.9	338.9	361.9	387.6	188.9	197.2	72.4	65.1	54.1	61.1	78.5	54.6	86.7	81.4	133.5	110
High	A2AG50	MAP7 domain-containing protein 2 OS=Mus musculus OX=10090 GN=Map7d2 PE=1 SV=1	EQQILEK	1xTMTpro [K7]; 1xTMTpro [N-Term]	47.8413	27	0.002381	226.3	266.3	326.2	390.9	366.7	407.8	358.9	397.4	460.7	444.8	1123.9	1106	1027.5	1203.4	577.4	598.5	410.6	428.2	494.1	516.3	546.5	611.3	721.4	641.3	946.3	767.4	1928.9	1883.2	1996.5	1915.9	1080.8	1087.1
High	A2AG50	MAP7 domain-containing protein 2 OS=Mus musculus OX=10090 GN=Map7d2 PE=1 SV=1	GAMAGGEPSQMEK	1xTMTpro [K13]; 1xTMTpro [N-Term]	42.46	46	8.838e-06	95	118.3	132.8	159.6	167.1	190.7	163.8	191	224.7	223.7	604.2	518.2	609.2	698.4	281	298.8	171.1	174.2	192.2	195.1	209	253	266.7	257.9	321.1	279	588.3	553	644.9	618.5	387.2	413	106	91.1	90.7	101.4	136.9	111.1	142.3	154	215.1	193.3
High	A2AG50	MAP7 domain-containing protein 2 OS=Mus musculus OX=10090 GN=Map7d2 PE=1 SV=1	GLSLLLAK	1xTMTpro [K8]; 1xTMTpro [N-Term]	81.656	33	0.0005777	29.5	36.8	43.9	54.1	60.4	56.2	52.1	61	78.8	72	201.3	189.1	244.1	261.7	110	114.1	49.1	39.1	60.9	53.8	74.3	68	106.6	88.8	137.9	101.1	269.1	211.7	305.7	272	151.8	151.1	33.7	41.5	38.1	35.2	54.5	44.3	58.9	64.9	100.1	82.9
High	A2AG50	MAP7 domain-containing protein 2 OS=Mus musculus OX=10090 GN=Map7d2 PE=1 SV=1	HSAPGGK	1xTMTpro [K7]; 1xTMTpro [N-Term]	20.8728	20	0.001245	76	73.5	94.9	100	130.8	123.5	118	149.1	136.3	159.2	389	283.4	405.5	456.1	197.5	199.3	88.2	101.4	99.3	120.5	155	144.2	233.3	176.4	228	188.3	438.2	390.7	527.3	530.1	305.6	283.1	102.9	81.1	99	112.5	142.1	128.7	139.7	180.2	246.9	204.8
High	A2AG50	MAP7 domain-containing protein 2 OS=Mus musculus OX=10090 GN=Map7d2 PE=1 SV=1	IEMAYKR	1xTMTpro [K6]; 1xTMTpro [N-Term]	44.7214	6	0.001829	81.2	71.7	78.8	99.8	112.9	121.1	97.2	111.9	112.5	96.5	244.9	179.2	208.7	232.4	135.5	154.7	76	86.4	81.9	82.9	94.4	95.1	131.6	96.5	111.1	111.4	249.4	268.1	243.2	276.1	156.2	148.6	64	65.3	60.4	62.6	68	62.1	92.8	87	115.8	96.1
High	A2AG50	MAP7 domain-containing protein 2 OS=Mus musculus OX=10090 GN=Map7d2 PE=1 SV=1	KCSWAGSPGPGGR	1xCarbamidomethyl [C2]; 1xTMTpro [K1]; 1xTMTpro [N-Term]	35.299	1	3.865e-05																																	93.6	73.9	86.4	99.6	119.4	95.4	96.7	112	163	136.2
High	A2AG50	MAP7 domain-containing protein 2 OS=Mus musculus OX=10090 GN=Map7d2 PE=1 SV=1	KSSENLSLDDCNKNLIEGFNSPGQETTLNTFC	2xCarbamidomethyl [C11; C32]; 2xTMTpro [K1; K13]; 1xTMTpro [N-Term]	74.8714	14	8.838e-06																																	62.9	65.8	57.1	53.8	79.7	60.5	100.1	87.2	114.9	110.5
High	A2AG50	MAP7 domain-containing protein 2 OS=Mus musculus OX=10090 GN=Map7d2 PE=1 SV=1	LEREQIMLQIEQERLER	1xTMTpro [N-Term]	60.988	14	8.838e-06	80.6	81.5	107.7	123.6	121.6	140.5	104.5	129.3	175.7	134.8	405.3	409.1	416.7	527.6	203.5	224.5	82	86	96.7	88.7	87.7	118.4	127.6	120	182.6	123.8	324.8	317.9	327	304.9	171.1	175.2
High	A2AG50	MAP7 domain-containing protein 2 OS=Mus musculus OX=10090 GN=Map7d2 PE=1 SV=1	LREEEERLEAMMR	1xTMTpro [N-Term]	61.9391	21	0.0001286	27.5	39.5	45.2	44.5	48.4	57.7	49.1	57.8	68.7	70.2	189.8	166.1	194.9	220.2	88.6	92.6	57.5	76.5	75.8	77	89.9	101.3	134.9	99.9	181.6	134.9	391.9	366.5	413.3	371.4	190.1	212.8	108.1	106.8	104.5	106.9	142.4	124.4	151.2	149.6	250.3	204.9
High	A2AG50	MAP7 domain-containing protein 2 OS=Mus musculus OX=10090 GN=Map7d2 PE=1 SV=1	LSTSTMNLPK	1xTMTpro [K10]; 1xTMTpro [N-Term]	58.3492	34	3.33e-05																	111.1	135.1	150.4	152.4	143.8	187.9	164.5	169.9	184.2	152.5	261.8	296.7	277.6	290.1	182.3	218.2	272.5	273.2	261.6	282.1	309.8	287	283	336.2	378.6	354.8
High	A2AG50	MAP7 domain-containing protein 2 OS=Mus musculus OX=10090 GN=Map7d2 PE=1 SV=1	NTPISAMGDAGK	1xTMTpro [K12]; 1xTMTpro [N-Term]	51.4488	52	8.838e-06	96.9	103.2	129.5	177.6	169.1	186.1	150.1	201.3	205.7	179.8	462	353.8	459.9	538.4	253.6	250.3	72.6	79.7	90.5	100.7	103.8	119.9	140.9	129.8	159.7	128.8	302.2	244.2	329.2	319	185.6	182.8	133.4	119.5	128.7	162.8	191.7	163.6	171.3	213.1	301.9	231.3
High	A2AG50	MAP7 domain-containing protein 2 OS=Mus musculus OX=10090 GN=Map7d2 PE=1 SV=1	QTESPMSK	1xTMTpro [K8]; 1xTMTpro [N-Term]	36.1231	28	0.0001568	102.1	105.4	133.7	170.5	173.9	186.6	145.5	170.1	199	194.9	480.4	445.7	488.2	595.8	261.8	278.1	119.7	117.4	137.9	139.8	181.5	188	244	212.1	302.9	238.6	605.5	562.5	640.9	618.8	320	339.5	237.8	243.8	245.3	255.4	331.9	278.1	351.4	395.9	565.7	481.8
High	A2AG50	MAP7 domain-containing protein 2 OS=Mus musculus OX=10090 GN=Map7d2 PE=1 SV=1	RCEPPEDISKR	1xCarbamidomethyl [C2]; 1xTMTpro [K10]; 1xTMTpro [N-Term]	30.8314	5	0.0005228	137.3	164.3	198.7	243.9	239.5	289.8	220.7	276.7	337.3	321.8	906.3	851.4	908.2	1086.2	447.9	467.9	129.8	156.2	148.3	145.1	170.4	193	226.2	217.7	318.7	269.6	632.9	608.6	663.5	661	339.3	364	80.2	89.5	75.6	64.3	94.8	78.5	95.8	99.1	152.3	119
High	A2AG50	MAP7 domain-containing protein 2 OS=Mus musculus OX=10090 GN=Map7d2 PE=1 SV=1	RLSSPVK	1xTMTpro [K7]; 1xTMTpro [N-Term]	35.6103	3	0.002479																	82.6	84.6	96.7	101.9	114.9	108.1	124.3	110.2	149.2	117.7	253	251.8	278.7	301	182.3	164.1	134.1	133.8	124.6	121.1	175	128.7	185.9	184.7	277.6	224.1
High	A2AG50	MAP7 domain-containing protein 2 OS=Mus musculus OX=10090 GN=Map7d2 PE=1 SV=1	SAEAASGR	1xTMTpro [N-Term]	15.7698	19	9.049e-05	78.3	105	132.8	126.9	139.8	145.6	139.4	145.6	179.4	196	461	448.9	451.8	543.1	238.2	260	340.1	332.6	408.9	410.5	482	538.7	671.7	592.1	989.3	690.8	1998.6	1778.2	2135	1935.4	1038.9	1037.4	178	181.5	181.7	178.6	227.3	196.2	270.1	281.3	408.8	327.2
High	A2AG50	MAP7 domain-containing protein 2 OS=Mus musculus OX=10090 GN=Map7d2 PE=1 SV=1	SAGMDGFLK	1xTMTpro [K9]; 1xTMTpro [N-Term]	62.7682	49	2.785e-05	351.7	399	476.1	591.1	594.4	669.3	562.7	621.6	703.4	669.5	1641.4	1550.5	1673.9	1876.3	891	913.4	124.3	124.8	147.6	143.6	171.1	193.8	215.5	196.6	309.7	233.4	618.3	508.6	675.8	599.3	343.2	334.9	545.5	523.9	526.7	535.9	596.5	523.8	579.5	656.7	823.7	706.5
High	A2AG50	MAP7 domain-containing protein 2 OS=Mus musculus OX=10090 GN=Map7d2 PE=1 SV=1	SSENLSLDDCNK	1xCarbamidomethyl [C10]; 1xTMTpro [K12]; 1xTMTpro [N-Term]	42.3232	38	8.838e-06	19.6	17.5	29.5	32.8	32.1	29.9	26	35.3	34.9	39.4	76.3	77	76.1	109.2	56.9	56.3	26.4	35.6	32.7	34.4	29	35.1	30.8	33.4	52.8	29.8	77.5	60.1	79.6	72.5	53.4	45.4
High	A2AG50	MAP7 domain-containing protein 2 OS=Mus musculus OX=10090 GN=Map7d2 PE=1 SV=1	TAKPTYLGSPVK	2xTMTpro [K3; K12]; 1xTMTpro [N-Term]	51.9612	13	8.838e-06	98.6	107.3	124	186.2	176.5	218.9	167	232.8	228.9	224.4	558.1	523.1	611	769.9	304.8	303.9	255.9	252.9	285.1	340.5	431.3	463.1	579.5	558.9	822.2	581	1454.9	1325.7	1632.1	1645.6	852	850.5
High	A2AG50	MAP7 domain-containing protein 2 OS=Mus musculus OX=10090 GN=Map7d2 PE=1 SV=1	TYPQSPK	1xTMTpro [K7]; 1xTMTpro [N-Term]	36.4935	16	0.001889	243	290.9	318.8	433.1	396.6	480.6	362.7	466.6	471	477.8	1030.1	973.9	1034.9	1250.5	594.4	554	126.3	132.4	149.4	160.2	190	220.5	252.9	241.5	345.9	234.4	668.2	568.5	723.7	667.9	367	359.3	284.7	331.4	305.7	328.6	458.3	391.7	461.8	509	792	616
High	A2AG50	MAP7 domain-containing protein 2 OS=Mus musculus OX=10090 GN=Map7d2 PE=1 SV=1	YYFPPIANEETPK	1xTMTpro [K13]; 1xTMTpro [N-Term]	72.6423	31	7.115e-05	47.8	57.8	62.3	75.4	73.2	85	61.1	78.6	89.6	82.8	162.4	143.1	156.4	178	102.2	101.9	37.2	47.7	50.4	52	50.8	58.8	58.7	54	69	49.6	113.1	108.7	104.9	106.1	72.8	63.6	96.4	91.2	95.4	88.6	112.1	89.2	94.8	109.7	140.2	132.7
High	A2AG50	MAP7 domain-containing protein 2 OS=Mus musculus OX=10090 GN=Map7d2 PE=1 SV=1	YYFPPIANEETPKK	2xTMTpro [K13; K14]; 1xTMTpro [N-Term]	64.9801	10	2.218e-05	90.4	95.6	129.3	161.3	141.4	141	130.5	131.5	131.6	142.7	262.7	259.3	283.3	315.6	161.6	184.1																	113.8	115.2	112.5	114.9	146.2	125.5	139.5	153.1	199.7	160
High	A2AGH6	Mediator of RNA polymerase II transcription subunit 12 OS=Mus musculus OX=10090 GN=Med12 PE=1 SV=1	LRQQLQAK	3xDeamidated [Q3; Q4; Q6]; 1xTMTpro [K8]; 1xTMTpro [N-Term]	45.8799	7	0.003402	239.5	243.7	234.7	287.3	313.6	322.1	246.2	326.7	264.3	335.2	890.8	758.2	885.8	967	514.4	501.2	283.5	424.1	263.8	335.9	306.1	320.5	383.7	376.2	356.1	475.3	790.6	1121.6	903.1	1169.4	582.4	583
High	A2AGH6	Mediator of RNA polymerase II transcription subunit 12 OS=Mus musculus OX=10090 GN=Med12 PE=1 SV=1	VLHTLEVLDSHSFER	1xTMTpro [N-Term]	71.5551	42	8.838e-06	13.3	12.2	15.5	19.9	18.6	19.6	12.1	16.3	12.7	14.8	26.2	22	26.9	27.9	21.5	20.5	14.2	18.5	11.4	14	16.2	21	16	12.8	22.4	16.7	33.3	32.2	27	23.6	15	22.9
High	A2AGL3	Ryanodine receptor 3 OS=Mus musculus OX=10090 GN=Ryr3 PE=1 SV=1	CQQEESQAAR	1xCarbamidomethyl [C1]; 1xTMTpro [N-Term]	16.5627	51	2.785e-05																	8	7.7	11.5	12.4	9	14	16.2	13.9	16.6	15.5	19.9	18.3	16.9	19	17	16.5
High	A2AGL3	Ryanodine receptor 3 OS=Mus musculus OX=10090 GN=Ryr3 PE=1 SV=1	CWDFFPAGDCFR	2xCarbamidomethyl [C1; C10]; 1xTMTpro [N-Term]	84.1671	26	2.218e-05	17	19.6	21.3	32	25.3	28.7	17.1	22.4	21.9	22	26	26.2	20.4	17	22.3	21.8	15.2	19.4	19.7	19.7	20.5	19.2	22.3	18.8	29.5	22.4	25.1	23.4	17.1	18.2	23.1	18.3
High	A2AGL3	Ryanodine receptor 3 OS=Mus musculus OX=10090 GN=Ryr3 PE=1 SV=1	DVAVWFSK	1xTMTpro [K8]; 1xTMTpro [N-Term]	75.3197	19	0.001949																																	26.4	31.2	31	35.4	43.4	37.3	37.3	47.7	56.2	55.5
High	A2AGL3	Ryanodine receptor 3 OS=Mus musculus OX=10090 GN=Ryr3 PE=1 SV=1	IAELLGLDK	1xTMTpro [K9]; 1xTMTpro [N-Term]	91.2938	27	7.513e-05																																	9.9	5.5	6.7	8.1	10.1	12.2	10.4	12.8	22.6	19
High	A2AGL3	Ryanodine receptor 3 OS=Mus musculus OX=10090 GN=Ryr3 PE=1 SV=1	IAVYAQPIISK	1xTMTpro [K11]; 1xTMTpro [N-Term]	72.3682	31	3.865e-05																	81.3	85.9	128.6	109.7	115.7	147.1	138.4	138.4	186.1	151.2	144.9	149.5	88.1	97.5	137.1	140.7
High	A2AGL3	Ryanodine receptor 3 OS=Mus musculus OX=10090 GN=Ryr3 PE=1 SV=1	IELGWTYGK	1xTMTpro [K9]; 1xTMTpro [N-Term]	73.6099	28	0.00029	29.7	36.2	44.8	48.8	59.3	64.2	52.7	65.5	59.9	75.2	61.4	64.6	32.6	49.4	50.5	56.7																	51.9	50.2	50.6	59	68.3	59.1	74.4	79.6	91.2	96
High	A2AGL3	Ryanodine receptor 3 OS=Mus musculus OX=10090 GN=Ryr3 PE=1 SV=1	LAENAHNVWAK	1xTMTpro [K11]; 1xTMTpro [N-Term]	51.9984	34	8.838e-06	44.7	36.3	52.8	65.8	78.5	76.6	65.3	94.6	83.3	130.2	95.9	96.2	47.5	43.9	69.5	79.4	31.3	31.5	49.1	51.2	63.4	57	58.3	53.2	85.1	85.5	64.7	70.7	30.1	29.6	63.7	60
High	A2AGL3	Ryanodine receptor 3 OS=Mus musculus OX=10090 GN=Ryr3 PE=1 SV=1	LVPYALLDER	1xTMTpro [N-Term]	80.046	47	2.218e-05	70.9	62.1	105.7	119.9	112.7	127.6	106.8	116.9	150.5	161.7	135.8	162.5	59.5	83.9	122.2	116.1	68.1	73.5	85.2	75.6	88.3	93.7	97.1	90.1	131.1	103.4	93.9	94.2	57.2	51.5	92.9	92.2
High	A2AGL3	Ryanodine receptor 3 OS=Mus musculus OX=10090 GN=Ryr3 PE=1 SV=1	MMFNLLR	1xTMTpro [N-Term]	81.5864	23	0.002825																	7.7	7	16.4	14.7	18.3	21.6	21.7	15.9	34.3	31.8	30.3	27.2	9.7	14.5	24.5	23.1	17.3	13.2	15.5	16.7	21.2	18.7	17.9	20.6	30.9	36.6
High	A2AGL3	Ryanodine receptor 3 OS=Mus musculus OX=10090 GN=Ryr3 PE=1 SV=1	RNLLLQTR	1xTMTpro [N-Term]	40.1153	38	3.33e-05																																	33.6	33.3	34.3	40.1	36.3	31.2	37.3	44.4	63.6	43.7
High	A2AGL3	Ryanodine receptor 3 OS=Mus musculus OX=10090 GN=Ryr3 PE=1 SV=1	RQYDSIGELLQALR	1xTMTpro [N-Term]	84.2515	42	8.838e-06																																	41.7	38.2	40.5	40.9	43.7	35.7	40.1	38.8	65.1	51.6
High	A2AGL3	Ryanodine receptor 3 OS=Mus musculus OX=10090 GN=Ryr3 PE=1 SV=1	RVFYEAGGAGTR	1xTMTpro [N-Term]	36.4762	11	0.002535																																	23.8	20.7	21.1	20.3	23.6	21.6	21.5	24	31.5	35.8
High	A2AGL3	Ryanodine receptor 3 OS=Mus musculus OX=10090 GN=Ryr3 PE=1 SV=1	YNELMQALNMSAALTAR	1xDeamidated [N2]; 1xTMTpro [N-Term]	64.9473	28	0.001069																																	4.9	5.1	6.8	8.5	6.9	9.3	6.8	12.9	22.5	21.1
High	A2AGT5	Cytoskeleton-associated protein 5 OS=Mus musculus OX=10090 GN=Ckap5 PE=1 SV=1	AAASGAAGDKDTK	2xTMTpro [K10; K13]; 1xTMTpro [N-Term]	32.2247	10	8.838e-06	108.1	125.1	118.9	161.5	124.5	154.7	111.6	156	114.7	144.8	291.5	233.2	259.4	264.2	197.1	205.2
High	A2AGT5	Cytoskeleton-associated protein 5 OS=Mus musculus OX=10090 GN=Ckap5 PE=1 SV=1	APGVSSK	1xTMTpro [K7]; 1xTMTpro [N-Term]	34.7348	18	0.0008081	147.4	152.7	164	224.1	169	172	129.7	142.2	155.8	149.1	330.8	301.8	334.4	319.2	232.5	235.1	80.4	84.9	87.5	76.9	80.6	82.2	96.5	80.5	100.3	71.3	174.3	147.7	183.6	148.4	117.3	122	463.7	462.9	410	432.6	431.3	403.5	387.4	488.9	509.8	582.9
High	A2AGT5	Cytoskeleton-associated protein 5 OS=Mus musculus OX=10090 GN=Ckap5 PE=1 SV=1	AQDALPFFMMHLGYEK	1xTMTpro [K16]; 1xTMTpro [N-Term]	93.2401	37	2.218e-05																	78.8	76.5	82.3	79.9	73.6	74.7	76.2	69.2	74.8	67.3	121.8	112.4	139.8	120.1	101.8	111.4	81.9	78.7	64	68.2	65	52.9	57.8	72.3	71.5	80.9
High	A2AGT5	Cytoskeleton-associated protein 5 OS=Mus musculus OX=10090 GN=Ckap5 PE=1 SV=1	ASAVLPPTCIQLLDSSNWK	1xCarbamidomethyl [C9]; 1xTMTpro [K19]; 1xTMTpro [N-Term]	88.8991	41	8.838e-06	82.8	75	88	96	66.8	85.4	67	70.5	63.6	71.6	114.3	95.9	108.5	102.1	90.1	94.8	36.3	35.9	41.2	30.3	27.8	37.1	34.9	30.5	43.1	29.8	50.3	54.1	50	55.6	37.4	44.1	40.5	42.1	27.3	30.6	25.8	28.2	25.3	27.4	33.6	33.9
High	A2AGT5	Cytoskeleton-associated protein 5 OS=Mus musculus OX=10090 GN=Ckap5 PE=1 SV=1	AVELMER	1xTMTpro [N-Term]	44.9856	27	0.002169	29.3	41.3	46.8	59	50.4	55.2	37.3	50.9	53.4	50.4	82.7	71.9	68.6	75.6	54.5	57.6																	62	57.4	51.3	56.1	62.3	49.2	57.8	61	67.2	73.3
High	A2AGT5	Cytoskeleton-associated protein 5 OS=Mus musculus OX=10090 GN=Ckap5 PE=1 SV=1	AVRDEAK	1xTMTpro [K7]; 1xTMTpro [N-Term]	26.3062	7	0.001205	60.5	65.7	77.6	96.3	69.3	79.9	59.7	70.2	66.4	65.5	159.4	137.4	147.4	149.9	115.3	116.3																	89.4	99.1	85.7	109	86.3	89.1	72.7	99.4	106.7	111.4
High	A2AGT5	Cytoskeleton-associated protein 5 OS=Mus musculus OX=10090 GN=Ckap5 PE=1 SV=1	CLTGLAVGLR	1xCarbamidomethyl [C1]; 1xTMTpro [N-Term]	64.2008	35	8.838e-06	179	187.5	211	291	225.2	268.2	179.9	219.3	212.7	191	384.9	306.6	350.3	369.8	273.1	282.3	307.7	310	310.6	350.7	283.2	327.5	298.1	314.4	372.3	276.4	546.9	439.8	572.5	439.4	402.2	406.1	22.1	25.6	19.6	22.2	21.9	20.2	17.5	22.6	21	24.8
High	A2AGT5	Cytoskeleton-associated protein 5 OS=Mus musculus OX=10090 GN=Ckap5 PE=1 SV=1	DAAFEALGTALK	1xTMTpro [K12]; 1xTMTpro [N-Term]	78.1642	55	8.838e-06	254.1	264.9	239.1	266.9	189	218.8	171	180.6	163.7	179.5	339.7	276.6	367.7	349.9	282.8	294.4	197.7	215	212.9	202	209.7	208.8	201.9	186.5	231	178.1	431.7	335.7	469.7	344.4	309.1	307.2	584.9	599.5	377.8	446.3	316.5	314.8	280.2	317.6	354.5	382.7
High	A2AGT5	Cytoskeleton-associated protein 5 OS=Mus musculus OX=10090 GN=Ckap5 PE=1 SV=1	DEYIEQLK	1xTMTpro [K8]; 1xTMTpro [N-Term]	58.3447	33	3.33e-05	142.2	137	143.7	168.4	134.1	149.7	110.1	138.1	117.5	152.6	287.5	246.5	267.3	290.9	187.8	200.6	274.5	325.4	287.6	305.4	312.2	297.2	267.1	241.4	320	264.7	548.5	488.1	629.6	466.3	411.2	422.1	462.5	406.8	374.3	413.2	411.8	344.5	283.2	360.7	414.2	454.1
High	A2AGT5	Cytoskeleton-associated protein 5 OS=Mus musculus OX=10090 GN=Ckap5 PE=1 SV=1	DLMHGLITLMLDSR	1xTMTpro [N-Term]	98.0209	68	8.838e-06																	36.1	33.3	32.1	31.5	31.9	27.1	28	30.2	34.9	32.8	60.2	58.9	78.4	66.8	45.1	48.1	36.2	36.6	30.3	34.9	29.2	23.1	23.8	35	39.2	36.4
High	A2AGT5	Cytoskeleton-associated protein 5 OS=Mus musculus OX=10090 GN=Ckap5 PE=1 SV=1	DMSMLEER	1xTMTpro [N-Term]	47.8205	31	0.0003877	246.4	288.2	283.5	349.6	312.4	326.4	258.8	298.7	282.5	368.5	591.5	577.2	780.5	762.5	441.2	480.6	242.7	314.1	294.7	319.2	331.4	376.6	319.1	349.3	418.8	352.7	554.7	506.1	609.3	567.7	424.4	455.7	352.8	353.2	328.5	360.4	366.9	351.7	312.3	375.4	417.2	455.6
High	A2AGT5	Cytoskeleton-associated protein 5 OS=Mus musculus OX=10090 GN=Ckap5 PE=1 SV=1	DQVLAMLEK	1xTMTpro [K9]; 1xTMTpro [N-Term]	77.1847	43	1.703e-05	215.9	244.9	232.3	298.7	243.6	283.8	196.1	251.6	217.4	251.6	574.5	433	543.6	541.2	342.8	406.4	329.2	406.2	362.3	383.3	395.5	407.8	393.1	348.6	405	378.7	750.2	683.5	961.8	882.8	559.5	600.3	204	187.8	173.9	204.9	183.3	181	157.7	200.1	219.9	231.1
High	A2AGT5	Cytoskeleton-associated protein 5 OS=Mus musculus OX=10090 GN=Ckap5 PE=1 SV=1	DTNVMLVALAAK	1xTMTpro [K12]; 1xTMTpro [N-Term]	81.6148	42	8.838e-06	155.6	162.4	166.1	201.4	167.4	181.8	136.7	157.9	129.4	143.4	303.5	283.3	316.2	317.9	243	241.4	147.3	191.2	156.2	166.7	143.5	151.7	137.6	135	150.9	115.6	226.5	200.3	262.5	203.2	194.8	202.3	109.9	100.5	94.1	104.2	98.6	85.7	75.8	114.2	103.7	107.6
High	A2AGT5	Cytoskeleton-associated protein 5 OS=Mus musculus OX=10090 GN=Ckap5 PE=1 SV=1	EALEAVEVLVK	1xTMTpro [K11]; 1xTMTpro [N-Term]	87.8748	37	2.218e-05																	76.9	108.9	96.8	89.8	95.3	89.1	90.6	75.9	89.5	76	149.8	130	165.3	126.4	122.2	123.7	88	93.9	79.6	86.1	93.6	76.1	64.7	90.4	93.6	100.7
High	A2AGT5	Cytoskeleton-associated protein 5 OS=Mus musculus OX=10090 GN=Ckap5 PE=1 SV=1	EASTGVLK	1xTMTpro [K8]; 1xTMTpro [N-Term]	44.2363	30	7.513e-05	98.2	123.3	110.7	133.8	117.2	119.4	77.2	103.7	89.2	116.5	250.4	244	285.6	297.4	177.4	186	420.1	494.9	387.1	411.4	348	365.6	340.6	305.3	383.7	339.1	776.5	651.7	855.4	672.7	542.4	553.7	189.7	183	154.1	175.6	166.9	150.3	138.6	166.3	177.7	212.7
High	A2AGT5	Cytoskeleton-associated protein 5 OS=Mus musculus OX=10090 GN=Ckap5 PE=1 SV=1	EFGFSELNVK	1xTMTpro [K10]; 1xTMTpro [N-Term]	73.3975	26	8.838e-06	351.2	373.8	397.7	430.6	432.9	433.8	309.7	408.3	390	422.4	681.9	612.2	657	665.8	529.6	564
High	A2AGT5	Cytoskeleton-associated protein 5 OS=Mus musculus OX=10090 GN=Ckap5 PE=1 SV=1	EFQLDLDEIENDNGTVR	1xTMTpro [N-Term]	74.6819	62	8.838e-06																																	131.1	151.2	117.6	132.6	132.9	125	117.8	161.3	155.4	146.4
High	A2AGT5	Cytoskeleton-associated protein 5 OS=Mus musculus OX=10090 GN=Ckap5 PE=1 SV=1	EGLAELYEYK	1xTMTpro [K10]; 1xTMTpro [N-Term]	70.4048	36	2.218e-05	67.1	98.7	86.2	112.4	92.4	103.3	77.2	87.9	81.8	100.2	176.4	134.3	176.8	181.7	126.2	131.7	102.5	119.5	115.8	129	130.1	141.2	108.8	113.3	123.9	98	186.1	165.6	206	214.4	147.5	172.3	123.6	115.4	117.4	121.4	138.3	106.8	109.2	122.6	146.8	151.9
High	A2AGT5	Cytoskeleton-associated protein 5 OS=Mus musculus OX=10090 GN=Ckap5 PE=1 SV=1	EGLDEVAGIINEAK	1xTMTpro [K14]; 1xTMTpro [N-Term]	79.7044	44	8.838e-06	159.7	201.2	220.5	255.4	211.2	246.3	188.8	198.2	200.3	198	334.6	290.7	309	329	274.7	293.1																	143	125.3	111	121.8	121	113.4	93.7	130.4	125.5	142.8
High	A2AGT5	Cytoskeleton-associated protein 5 OS=Mus musculus OX=10090 GN=Ckap5 PE=1 SV=1	EIAIHIGDR	1xTMTpro [N-Term]	49.0146	47	7.513e-05	120.4	117.2	124.5	140.9	128	134.1	97.5	128.9	99.2	125.7	191.9	159	169.6	198.2	165	171.1	99.1	141	118.5	132.3	123.9	136.2	115.1	110.6	138.9	112.5	164.8	156.9	178.3	152.1	142.2	148.9	154.7	158.9	128	162	148.4	147.1	96.2	129.9	146.7	149.3
High	A2AGT5	Cytoskeleton-associated protein 5 OS=Mus musculus OX=10090 GN=Ckap5 PE=1 SV=1	EIAIHIGDRDNAVR	1xTMTpro [N-Term]	45.6881	17	2.785e-05	78.4	88.7	99.6	122.5	98.1	113.2	83.1	91.5	91.6	106	197.2	166.1	203.7	181.9	141.8	143.9	43.3	51	51.7	56.7	44	49.4	44	36.6	46.9	39.2	88.7	79.8	98.9	80.1	66	63.9	34	41.8	36.7	36.8	39.8	32.8	31.3	40.2	47.4	46.6
High	A2AGT5	Cytoskeleton-associated protein 5 OS=Mus musculus OX=10090 GN=Ckap5 PE=1 SV=1	ELEEEWVK	1xTMTpro [K8]; 1xTMTpro [N-Term]	62.0018	31	6.035e-05																																	315.3	280.7	279.6	312.2	318.3	264	234.9	299.7	329.6	369.4
High	A2AGT5	Cytoskeleton-associated protein 5 OS=Mus musculus OX=10090 GN=Ckap5 PE=1 SV=1	ETNFQVMQMK	1xTMTpro [K10]; 1xTMTpro [N-Term]	62.0803	38	3.33e-05	118	130.9	155.4	166	154.1	163.9	137	153.4	139.3	150.6	285.3	260.5	270.8	311.3	213.3	214.1																	99.5	120.2	87.1	120.6	109.7	104.9	96.7	112.2	111.2	125.6
High	A2AGT5	Cytoskeleton-associated protein 5 OS=Mus musculus OX=10090 GN=Ckap5 PE=1 SV=1	FGQYAGHVVPTILEK	1xTMTpro [K15]; 1xTMTpro [N-Term]	72.4203	28	2.218e-05	66.5	73.4	91.2	119.4	81.2	105.1	67.9	86.7	71.5	77.8	160.6	140.5	174.2	193.2	126.4	117.1																	81.7	69.8	60.8	67.6	66.2	62	53.6	66.2	72.9	69.8
High	A2AGT5	Cytoskeleton-associated protein 5 OS=Mus musculus OX=10090 GN=Ckap5 PE=1 SV=1	FSELVMK	1xTMTpro [K7]; 1xTMTpro [N-Term]	68.3291	23	0.002301	68	79.7	85.9	110.7	79.4	93.6	68.8	81.5	82.6	94.4	177.6	172.9	183.1	202.2	123	138.4																	78	85.2	69.1	80.1	81.3	70.7	64.2	88.3	96	95.2
High	A2AGT5	Cytoskeleton-associated protein 5 OS=Mus musculus OX=10090 GN=Ckap5 PE=1 SV=1	FVTDSNAVVQLK	1xTMTpro [K12]; 1xTMTpro [N-Term]	66.6604	51	8.838e-06	175.9	187.1	185.1	240.1	151.9	167	122.8	143.1	110.3	139.5	171.4	162.4	160.6	181.3	176.2	185.9	119.6	116.9	122.5	113.7	130.1	135.4	125	120.1	141.5	107.1	234.4	180.5	256.6	203.8	180.3	165.6	124.8	133.5	108.8	126.4	137.7	113.5	110.7	138.6	148.1	149.1
High	A2AGT5	Cytoskeleton-associated protein 5 OS=Mus musculus OX=10090 GN=Ckap5 PE=1 SV=1	GLDNKNPK	2xTMTpro [K5; K8]; 1xTMTpro [N-Term]	36.2866	13	0.002933																																	107.1	116.7	99.9	112.3	93.3	102	93.4	123.7	115.2	123.8
High	A2AGT5	Cytoskeleton-associated protein 5 OS=Mus musculus OX=10090 GN=Ckap5 PE=1 SV=1	HSMDQTGSK	1xTMTpro [K9]; 1xTMTpro [N-Term]	23.617	44	2.218e-05																	101.2	114.1	119.8	132.8	135.5	155.6	140.3	124.1	160.6	119.3	257.8	182.9	259.1	206.4	178.6	189.5	97.3	93.3	93.9	101.5	109.8	100.4	100.3	121.1	113.7	117.1
High	A2AGT5	Cytoskeleton-associated protein 5 OS=Mus musculus OX=10090 GN=Ckap5 PE=1 SV=1	HSMDQTGSK	1xOxidation [M3]; 1xTMTpro [K9]; 1xTMTpro [N-Term]	18.1318	17	0.0003641																	9.2	13.3	11.8	19.9	16	21.3	23.3	22.3	23.9	20.7	28.5	36.6	29.6	24.8	22	20.8
High	A2AGT5	Cytoskeleton-associated protein 5 OS=Mus musculus OX=10090 GN=Ckap5 PE=1 SV=1	IEDLEEGQQVIR	1xTMTpro [N-Term]	58.2511	40	8.838e-06	154	172.7	162.8	181.6	152.5	153.6	114.1	135.4	138.6	153.2	330.9	257.1	314.2	325.2	229.9	237.6	195.3	200.5	208.4	194.3	175.2	193	179.9	188.3	200.2	168.4	304.9	290.3	347.5	278.9	244.5	257.6	270.9	289.8	232.5	246.3	239.5	211	195.1	238.1	253.3	299.4
High	A2AGT5	Cytoskeleton-associated protein 5 OS=Mus musculus OX=10090 GN=Ckap5 PE=1 SV=1	IEISDKITSELVSK	2xTMTpro [K6; K14]; 1xTMTpro [N-Term]	77.7368	18	8.838e-06	176.4	218.5	253.2	308.7	232.8	294.9	190	213	223.7	213.1	447	443.6	456.7	453.5	323.1	328.5	96.1	96.5	109.8	99.4	89.9	110.1	117.7	104.4	131.6	93.7	217	162.4	237.9	173.6	151	151.5
High	A2AGT5	Cytoskeleton-associated protein 5 OS=Mus musculus OX=10090 GN=Ckap5 PE=1 SV=1	IISLKPIIK	2xTMTpro [K5; K9]; 1xTMTpro [N-Term]	78.916	7	0.0002942																	264.8	287.5	308.9	339.1	309.7	333.4	351.9	315.7	392.2	269.7	670.9	525.2	755	554.2	474.5	476	95.6	118.1	94.9	103.3	107.3	100.3	96.3	120.9	113.3	134.1
High	A2AGT5	Cytoskeleton-associated protein 5 OS=Mus musculus OX=10090 GN=Ckap5 PE=1 SV=1	IKDEKSPEWSK	3xTMTpro [K2; K5; K11]; 1xTMTpro [N-Term]	48.252	0	0.005862	151.6	161.6	234.4	290.1	215.7	290.7	197	231.8	226.4	199.3	290.5	316.5	242.8	307.5	246.2	264.4
High	A2AGT5	Cytoskeleton-associated protein 5 OS=Mus musculus OX=10090 GN=Ckap5 PE=1 SV=1	ILLDIHIFMK	1xTMTpro [K10]; 1xTMTpro [N-Term]	97.7659	33	0.0004657																	5.4	7.4	11.1	8.4	9.5	10.5	7.2	7	10.9	7.3	19.5	17.6	35.1	21.1	17.6	16.1
High	A2AGT5	Cytoskeleton-associated protein 5 OS=Mus musculus OX=10090 GN=Ckap5 PE=1 SV=1	IRKEGLDEVAGIINEAK	2xTMTpro [K3; K17]; 1xTMTpro [N-Term]	69.648	14	8.838e-06																	185.6	195.4	216.2	186.3	173.9	214.1	182.8	194.7	227.5	131.5	260.9	222.4	249.6	202.5	214.9	232.1
High	A2AGT5	Cytoskeleton-associated protein 5 OS=Mus musculus OX=10090 GN=Ckap5 PE=1 SV=1	ITSELVSK	1xTMTpro [K8]; 1xTMTpro [N-Term]	58.5832	39	6.573e-05																	342.9	380.5	343.8	401.2	365.1	420.1	369.7	326.9	441.8	342.3	703.4	552.9	746.5	616.7	496.6	535.7	570.7	462.9	498.7	579	535.9	561.7	420.9	570.5	639.2	706
High	A2AGT5	Cytoskeleton-associated protein 5 OS=Mus musculus OX=10090 GN=Ckap5 PE=1 SV=1	KEALEAVEVLVK	2xTMTpro [K1; K12]; 1xTMTpro [N-Term]	81.9332	20	2.218e-05																	27.8	30.9	31.7	33.4	39.8	30.1	40.2	33.2	32.7	29.8	66	48	83	54.1	46.9	51.6
High	A2AGT5	Cytoskeleton-associated protein 5 OS=Mus musculus OX=10090 GN=Ckap5 PE=1 SV=1	KEGLDEVAGIINEAK	2xTMTpro [K1; K15]; 1xTMTpro [N-Term]	74.2134	23	8.838e-06																																	151.6	140.5	140.5	150.7	145.1	142.4	118.2	155.9	150.5	172.4
High	A2AGT5	Cytoskeleton-associated protein 5 OS=Mus musculus OX=10090 GN=Ckap5 PE=1 SV=1	KGPAEDMSSK	2xTMTpro [K1; K10]; 1xTMTpro [N-Term]	38.1947	10	0.0003877																	85.8	105.5	99.3	98	103.3	115.1	111.4	106.9	132	84	224.8	189.7	238.8	209.8	162.3	165.2	427	425.6	401.6	443.5	421.3	411.3	345.4	469.1	484.4	562.6
High	A2AGT5	Cytoskeleton-associated protein 5 OS=Mus musculus OX=10090 GN=Ckap5 PE=1 SV=1	KYSDTDIEPFLK	2xTMTpro [K1; K12]; 1xTMTpro [N-Term]	68.0565	26	8.838e-06	105.5	122.5	139	162.1	129.8	162.6	115.9	139.9	132.7	123.6	260.4	251.3	245.9	260.2	182.5	195.8	96.4	108.5	108.7	115.8	102.2	114.8	111.9	109.9	119.6	94.4	217.4	184.5	221.1	183.3	148.6	159.1	242.2	230.8	211.9	248.3	204.2	213.3	192.3	254.1	257.9	308.8
High	A2AGT5	Cytoskeleton-associated protein 5 OS=Mus musculus OX=10090 GN=Ckap5 PE=1 SV=1	LACMEEFQK	1xCarbamidomethyl [C3]; 1xTMTpro [K9]; 1xTMTpro [N-Term]	64.1848	45	2.218e-05	329.4	391	463.6	571.9	418.2	512	358.4	397.1	428.8	423.1	596.8	550.3	517.8	519.6	475.2	489.5																	484.6	476	460.7	419.8	448.1	364.8	478	462	563.6	521.3
High	A2AGT5	Cytoskeleton-associated protein 5 OS=Mus musculus OX=10090 GN=Ckap5 PE=1 SV=1	LEAGDYADLVK	1xTMTpro [K11]; 1xTMTpro [N-Term]	68.458	51	8.838e-06	168.6	195.3	205.6	250.6	218.6	231.4	171.4	190.1	194.6	201.4	376.6	328.8	367.1	392.6	260.7	274.3																	326.5	348.5	282	282.3	291.3	276.4	266.4	316.2	324.4	358.2
High	A2AGT5	Cytoskeleton-associated protein 5 OS=Mus musculus OX=10090 GN=Ckap5 PE=1 SV=1	LFAIEIYR	1xTMTpro [N-Term]	82.2689	26	0.001084																																	11.8	12.6	7.8	14	8.6	11.7	8.1	11.9	8.2	10.1
High	A2AGT5	Cytoskeleton-associated protein 5 OS=Mus musculus OX=10090 GN=Ckap5 PE=1 SV=1	LHIVALIAQK	1xTMTpro [K10]; 1xTMTpro [N-Term]	74.8793	54	8.838e-06	52.8	69.5	73.7	88.7	81.7	101.5	64	82.4	82.8	84.8	155.3	136.7	170.8	174	107.8	121.8	64.3	70.3	88.8	104.5	89.8	94.2	89.3	99.7	88.9	73.4	133.8	97.7	166.8	124.9	104.2	118.2	42.3	46.9	35.9	53	46.7	47.6	44	54.9	56.3	62
High	A2AGT5	Cytoskeleton-associated protein 5 OS=Mus musculus OX=10090 GN=Ckap5 PE=1 SV=1	LIGNLSEK	1xTMTpro [K8]; 1xTMTpro [N-Term]	59.5733	18	0.001607	101.5	99.3	109.4	137.8	98.9	103.4	82.9	93.8	100.5	126.3	296	266	288	315.1	170.2	190.8																	125	108.9	124.3	151.3	137	141.4	107.4	161.5	172.8	191.6
High	A2AGT5	Cytoskeleton-associated protein 5 OS=Mus musculus OX=10090 GN=Ckap5 PE=1 SV=1	LKPTSKDQVLAMLEK	3xTMTpro [K2; K6; K15]; 1xTMTpro [N-Term]	75.7204	6	2.218e-05	67.8	96.7	153.8	191.4	116.4	172.2	99.6	117.7	133.2	96.7	154	223.2	143.3	198.8	138.4	146.5	154	101.9	194.2	131.6	109	211	171.6	197.6	265.5	127.5	346.1	261.2	348.9	239.3	258.7	241.6	225.1	356.8	203.8	166.1	190.9	215.7	248.1	337.1	279.6	386.4
High	A2AGT5	Cytoskeleton-associated protein 5 OS=Mus musculus OX=10090 GN=Ckap5 PE=1 SV=1	LLPDTINSINLDR	1xTMTpro [N-Term]	77.4729	62	8.838e-06	125.3	149.1	154.9	171	151.7	179.4	120.5	141.7	127.3	153.6	288.3	258	302.8	314.6	231.5	216.6	93.6	120	89.1	106.5	80.3	69	74.2	66.7	82.9	63	138.5	128	172.8	149.8	113.3	115.8	275.8	315.5	214.8	237.9	233.2	188.7	173.8	226.1	214.3	255.4
High	A2AGT5	Cytoskeleton-associated protein 5 OS=Mus musculus OX=10090 GN=Ckap5 PE=1 SV=1	LSGYEEALK	1xTMTpro [K9]; 1xTMTpro [N-Term]	60.0584	37	8.838e-06	98.4	109.1	126.9	149.3	127.6	136.1	100.5	126.2	102.6	121.4	208.2	191.8	194	208.6	162.9	161	515.9	530	565.2	545.5	529.7	580.4	552.3	510.6	615.4	502.1	1034.4	843.2	1122.1	868.5	730.5	739.6
High	A2AGT5	Cytoskeleton-associated protein 5 OS=Mus musculus OX=10090 GN=Ckap5 PE=1 SV=1	MCLVYPASK	1xCarbamidomethyl [C2]; 1xTMTpro [K9]; 1xTMTpro [N-Term]	62.5228	27	0.0006133	297.6	335.8	405	489.9	427.8	502.3	362.2	423.8	379	399.7	466.9	412.8	392.7	423.8	426.5	430.1	167.7	188.9	188.2	218.3	200.3	252.9	211.6	227.7	207.4	167.1	219.3	182.7	215.1	178.1	212.2	212.4	108.1	112.6	109.4	122.8	128.2	104.5	121.5	130.5	132.5	123.1
High	A2AGT5	Cytoskeleton-associated protein 5 OS=Mus musculus OX=10090 GN=Ckap5 PE=1 SV=1	MFPFIMEGTK	1xTMTpro [K10]; 1xTMTpro [N-Term]	91.3835	34	3.33e-05	52.5	60.5	86.1	89.8	76.3	87.1	62.5	65.2	71.4	74.1	152.9	125.8	148.5	154.9	105.5	119.3	49.5	56.5	57.8	61.3	46.5	61.6	61.4	52.6	63.1	48.7	114.9	85.2	115.7	90	80.3	88.1	56.4	61.8	47.4	49.4	51.3	53.2	44.1	54.5	55.5	60.2
High	A2AGT5	Cytoskeleton-associated protein 5 OS=Mus musculus OX=10090 GN=Ckap5 PE=1 SV=1	MIFEDEKPALLSQIDAEFQK	2xTMTpro [K7; K20]; 1xTMTpro [N-Term]	96.2006	35	8.838e-06	45.7	60.1	66.8	78.6	63.8	76.4	50	59.2	52.4	65.7	116	117.5	115.1	123.8	97.6	91.9	62.2	69.1	70.1	69.7	59.5	73.4	64.3	70.6	69.8	66.8	136.8	129.5	149.6	125.8	94.8	92.5
High	A2AGT5	Cytoskeleton-associated protein 5 OS=Mus musculus OX=10090 GN=Ckap5 PE=1 SV=1	MQGQSPPAPTR	1xTMTpro [N-Term]	30.0118	21	2.218e-05	88.4	102.3	109.3	157.4	115.4	127.4	91.6	123	113.1	100.6	206.8	182.4	189.2	211.3	141.3	146.7	103.4	113.3	117.3	114.6	114.2	129.1	111.1	117.8	151.2	99.2	241.7	170.7	260.3	199.6	154.2	155.5	119	120	105.6	118.3	105.9	109.2	89.5	120.9	125.2	130.5
High	A2AGT5	Cytoskeleton-associated protein 5 OS=Mus musculus OX=10090 GN=Ckap5 PE=1 SV=1	NAALNTIVTVYNVHGDQVFK	1xTMTpro [K20]; 1xTMTpro [N-Term]	77.4691	63	8.838e-06																	108.9	141.7	118.2	166	118.1	134.1	135.9	118.7	148.8	118.2	235.3	176.7	229.2	200.3	144	162.9	124.7	110.9	106.5	111.3	99	104.6	88	111.4	113.4	109.7
High	A2AGT5	Cytoskeleton-associated protein 5 OS=Mus musculus OX=10090 GN=Ckap5 PE=1 SV=1	NLGIPVITVLGDSK	1xTMTpro [K14]; 1xTMTpro [N-Term]	91.5359	35	2.218e-05	25.7	26.9	29.6	43.3	37.8	40.2	29.1	39	26.2	35.7	57.5	43.3	57.3	63.7	45.2	49																	194.3	175.7	154.6	178.3	122.5	113.9	101.2	125.3	111.6	115.4
High	A2AGT5	Cytoskeleton-associated protein 5 OS=Mus musculus OX=10090 GN=Ckap5 PE=1 SV=1	NQSETLNWLSNAIK	1xTMTpro [K14]; 1xTMTpro [N-Term]	80.6716	39	8.838e-06	101.6	125.1	125.6	160.1	132.8	156.3	109.2	136.6	110	118.8	203.5	181.8	215	252.7	164.1	184.4																	37.2	35.8	26.3	36.6	33.2	29.1	23.3	27.9	42.5	28.4
High	A2AGT5	Cytoskeleton-associated protein 5 OS=Mus musculus OX=10090 GN=Ckap5 PE=1 SV=1	NSSQFFQSYVER	1xTMTpro [N-Term]	58.5131	44	2.785e-05	103.9	103.7	126.8	155.8	127.3	136.9	123.1	106.5	111.8	110.6	156.5	159.2	154.5	176.3	142.5	137.2	122	149.5	110.2	123.1	96.3	132.3	107.1	118.7	95.6	103.7	120.7	122.7	108.1	105.3	116.3	112.6	269.3	256.4	200.9	220.1	205.4	174.1	190.7	210.9	222	212
High	A2AGT5	Cytoskeleton-associated protein 5 OS=Mus musculus OX=10090 GN=Ckap5 PE=1 SV=1	QAEEKPQR	1xTMTpro [K5]; 1xTMTpro [N-Term]	22.5738	9	0.0004657																	238.1	296.3	297.2	308	261.8	310.1	318.8	283.3	375.9	280.7	691	567.2	691.2	576.6	421.1	475.8	202.7	199.4	174.4	191.1	197	172.6	176.2	222.8	220.6	246.7
High	A2AGT5	Cytoskeleton-associated protein 5 OS=Mus musculus OX=10090 GN=Ckap5 PE=1 SV=1	QELLGWLAEK	1xTMTpro [K10]; 1xTMTpro [N-Term]	87.5743	33	6.035e-05	72.2	79.6	75.8	102.7	81.1	93.7	61.4	88.4	71.6	85.2	176.6	131.1	177.3	167.1	116.6	112.4	53.8	59.6	60.4	64.4	58.5	56.8	54.7	48.3	54.9	54.6	91.2	72.4	101.2	90.6	70.6	75	143.9	125	107.4	148.2	134.6	115.1	92.3	123.3	147.2	151.8
High	A2AGT5	Cytoskeleton-associated protein 5 OS=Mus musculus OX=10090 GN=Ckap5 PE=1 SV=1	QELLGWLAEK	1xDeamidated [Q1]; 1xTMTpro [K10]; 1xTMTpro [N-Term]	91.54	31	0.0006252	14.9	10.7	15.1	20.1	14.2	13.9	12.3	16.8	9.5	17.2	32.6	24.4	28.8	27.1	20.7	21.7
High	A2AGT5	Cytoskeleton-associated protein 5 OS=Mus musculus OX=10090 GN=Ckap5 PE=1 SV=1	QQTSLFIAR	1xTMTpro [N-Term]	51.5099	10	0.00038	265.7	285.2	290.8	370.6	342	385.8	257.9	348.9	263	281	407	353.9	381.1	437.8	361	370.7																	415.8	392.1	345.8	392.4	388.5	354.7	344.5	407.6	366	386.9
High	A2AGT5	Cytoskeleton-associated protein 5 OS=Mus musculus OX=10090 GN=Ckap5 PE=1 SV=1	QRAECLEELGCLIESYGMNVCQPTPGK	3xCarbamidomethyl [C5; C11; C21]; 1xTMTpro [K27]; 1xTMTpro [N-Term]	89.523	33	8.838e-06																																	76	72	65.1	66	60.1	40.4	57.4	63.2	59	59.5
High	A2AGT5	Cytoskeleton-associated protein 5 OS=Mus musculus OX=10090 GN=Ckap5 PE=1 SV=1	REFQLDLDEIENDNGTVR	1xDeamidated [N14]; 1xTMTpro [N-Term]	65.9762	67	8.838e-06	123.9	127.8	150.9	169.7	132.5	144.5	118.3	128.7	140.8	135.2	290.3	230.6	262.1	256.1	200	199	46.8	58.9	54.7	56.3	58.1	58.2	59.9	51	71.4	52.4	122.3	98	124.1	101.4	74.7	83.4	170.5	144.5	138	163.8	142.9	125.3	119.4	146	162.9	177.1
High	A2AGT5	Cytoskeleton-associated protein 5 OS=Mus musculus OX=10090 GN=Ckap5 PE=1 SV=1	REFQLDLDEIENDNGTVR	1xTMTpro [N-Term]	63.1798	63	8.838e-06	76.9	88.7	96.8	105.5	99.6	103.2	82.6	83.2	101.1	94.7	204.6	182.9	211.3	191.9	136.3	129.5	98.1	93.2	103.5	111.6	100.6	113.2	111.6	101.6	140	99.1	272	221.1	306.6	215.1	160.4	167.9	86.9	85	74.3	81.2	75.7	75.3	78.2	88	105.5	103.5
High	A2AGT5	Cytoskeleton-associated protein 5 OS=Mus musculus OX=10090 GN=Ckap5 PE=1 SV=1	SGLATEK	1xTMTpro [K7]; 1xTMTpro [N-Term]	37.2467	15	0.001208	219.9	248.5	256.7	350.3	235.5	307.2	209.2	269.8	241.6	272.5	441.5	376.7	402.1	444.3	334.9	344.4	525.1	682.1	569.5	627.9	484.5	618.3	531.9	572.7	560.9	500.1	806	780.5	772.1	743.5	639.1	697.2	307.4	310	267.1	346.5	283.8	282.7	246.6	322.5	338.2	352.9
High	A2AGT5	Cytoskeleton-associated protein 5 OS=Mus musculus OX=10090 GN=Ckap5 PE=1 SV=1	SLLKPFCAALLK	1xCarbamidomethyl [C7]; 2xTMTpro [K4; K12]; 1xTMTpro [N-Term]	85.684	13	8.838e-06	48.4	67	77.5	100.1	69.4	91.3	54.4	67.6	67.4	62.5	145.1	136.4	127.5	149.4	92.8	100.5	27.8	31.6	38.8	33.2	30	38.7	39.1	33.6	46.8	29.5	69.7	62.3	79.6	47.7	48.5	50.6
High	A2AGT5	Cytoskeleton-associated protein 5 OS=Mus musculus OX=10090 GN=Ckap5 PE=1 SV=1	SQQELEAK	1xTMTpro [K8]; 1xTMTpro [N-Term]	35.319	37	6.035e-05																	363.1	463.7	354.9	430.3	358.1	360.7	347	314.9	348.8	303.4	533.4	463.8	627.8	560.9	461.7	480.1	415.5	373.8	301.7	381.1	309.6	298.8	221.7	308.9	311.4	353.1
High	A2AGT5	Cytoskeleton-associated protein 5 OS=Mus musculus OX=10090 GN=Ckap5 PE=1 SV=1	SVNLLVVK	1xTMTpro [K8]; 1xTMTpro [N-Term]	69.4321	35	4.494e-05	170.6	196.9	202.3	254.5	214.5	232.1	167.4	214.5	182.4	192.6	384.4	356	472.3	504.2	297.1	292	503.5	562.4	547.6	587.5	513.4	579.7	496.4	495.6	588.6	473.2	983.6	812.3	1162.8	961.2	729.6	728.7	290.7	299	264.3	281	280.1	230.3	236.1	287.5	303.5	293.7
High	A2AGT5	Cytoskeleton-associated protein 5 OS=Mus musculus OX=10090 GN=Ckap5 PE=1 SV=1	SVNPFLADVDK	1xTMTpro [K11]; 1xTMTpro [N-Term]	71.4675	41	2.218e-05	118.8	113.1	128.6	154.5	128	130.7	108	142.7	109.4	130.5	241.6	182.1	197.3	222.8	175.9	179.5																	115	126.2	113.4	130.2	130.7	116.3	93.9	122.9	138.6	154.3
High	A2AGT5	Cytoskeleton-associated protein 5 OS=Mus musculus OX=10090 GN=Ckap5 PE=1 SV=1	SVNPFLADVDKLK	2xTMTpro [K11; K13]; 1xTMTpro [N-Term]	78.9861	8	0.0001094																																	67	57.1	52.9	49.9	42.6	42.2	32.7	43.3	50.6	52.1
High	A2AGT5	Cytoskeleton-associated protein 5 OS=Mus musculus OX=10090 GN=Ckap5 PE=1 SV=1	TALAATNPAVR	1xTMTpro [N-Term]	40.4899	38	8.838e-06	384.5	406.4	400.2	582.2	364.7	497	303	413	404.6	388.9	843.8	684.4	814.3	922.1	575.2	584.3	379.2	369.7	362.4	409.5	327.8	387.2	339.8	319.7	427.9	276.1	744.2	543.7	762.5	642.4	493	465.6	584.1	562.7	492	630.3	492.7	523.5	430.9	555.9	591	601.6
High	A2AGT5	Cytoskeleton-associated protein 5 OS=Mus musculus OX=10090 GN=Ckap5 PE=1 SV=1	TEMPCQALVK	1xCarbamidomethyl [C5]; 1xTMTpro [K10]; 1xTMTpro [N-Term]	56.0624	32	8.838e-06	373.5	457.1	437.7	598.3	390.7	507.4	318.4	348.2	257.9	309.5	273.1	250	248.7	246	380.7	399.1	193.2	204.2	198.2	239	182.1	229	196.5	198.7	246.1	178.4	414.2	328.2	408.5	369.4	287.6	305.8	201.9	202.9	167.4	194.2	166	167.8	124.5	158.6	142.3	160.1
High	A2AGT5	Cytoskeleton-associated protein 5 OS=Mus musculus OX=10090 GN=Ckap5 PE=1 SV=1	TQMSTCVAK	1xCarbamidomethyl [C6]; 1xTMTpro [K9]; 1xTMTpro [N-Term]	40.301	49	8.838e-06	417.3	450.5	399.5	534.5	403.5	500.3	382.1	423.6	378.4	439.5	441.2	383.5	367.2	417.5	482.2	465.5	506.4	619.8	437.8	495.9	470.3	504.7	450.2	449	478.9	384.5	560.9	466.4	575.8	501.8	489	526.5	325.4	316	270.2	362.6	302.6	288.2	243.6	338.9	337.1	361.5
High	A2AGT5	Cytoskeleton-associated protein 5 OS=Mus musculus OX=10090 GN=Ckap5 PE=1 SV=1	TQNINSNANMLR	1xTMTpro [N-Term]	40.162	53	8.838e-06	110.8	127.4	121.5	165.1	106	140	103.3	108.2	134.3	126.1	241.5	210.8	219	237	164.3	163.2	194.6	189.2	203.8	238.4	183.2	223	199.2	182.5	247.7	164.9	449.8	319.9	432.1	345.8	264.1	280	219.9	195.8	162.6	219.9	175.8	194.4	174.9	216	235	211.5
High	A2AGT5	Cytoskeleton-associated protein 5 OS=Mus musculus OX=10090 GN=Ckap5 PE=1 SV=1	TQPIPAPVEDSVSSTIEAKPDLKK	3xTMTpro [K19; K23; K24]; 1xTMTpro [N-Term]	69.6333	16	8.838e-06																																	120.7	151.3	117.4	144.6	129.2	145.3	129.3	189.4	157.8	176.8
High	A2AGT5	Cytoskeleton-associated protein 5 OS=Mus musculus OX=10090 GN=Ckap5 PE=1 SV=1	TSAQIVLDGLVDK	1xTMTpro [K13]; 1xTMTpro [N-Term]	79.253	44	8.838e-06	85.9	79.3	89.7	121.9	97	114.4	61.4	94.5	71.5	83.6	146.1	109.5	136.2	145.5	111	101.9																	182.4	171.8	144	192.5	159.1	146.5	122.9	191.9	170.1	177.5
High	A2AGT5	Cytoskeleton-associated protein 5 OS=Mus musculus OX=10090 GN=Ckap5 PE=1 SV=1	TSAQIVLDGLVDKIGDVK	2xTMTpro [K13; K18]; 1xTMTpro [N-Term]	96.3414	9	8.838e-06																	56.5	46.7	55.4	54.8	52.6	64.7	65.6	56.9	89.1	54.5	144.4	138.2	167.6	146.1	87.1	85.9
High	A2AGT5	Cytoskeleton-associated protein 5 OS=Mus musculus OX=10090 GN=Ckap5 PE=1 SV=1	TTAPGGSASAGTK	1xTMTpro [K13]; 1xTMTpro [N-Term]	29.8442	62	8.838e-06	113.4	118.2	141.7	198.4	147.1	178.4	101.7	149.8	127.2	125.3	287	224.4	264.3	284	192.4	184.9	100.9	101.5	125.2	139.7	116.5	130.4	127	122.8	164.3	104	259.1	180.3	265.7	218.4	186.5	175.8	143.3	144.5	127.6	155.9	144.8	143.9	116.2	185.6	174.6	176.8
High	A2AGT5	Cytoskeleton-associated protein 5 OS=Mus musculus OX=10090 GN=Ckap5 PE=1 SV=1	TTGEVVSGVVSK	1xTMTpro [K12]; 1xTMTpro [N-Term]	52.5611	38	8.838e-06																																	285.4	249	227.9	263.8	257.7	241.2	221.6	275.8	268.8	263.3
High	A2AGT5	Cytoskeleton-associated protein 5 OS=Mus musculus OX=10090 GN=Ckap5 PE=1 SV=1	TTLKEDDDKSGPIFIVVPNGK	1xDeamidated [N19]; 3xTMTpro [K4; K9; K21]; 1xTMTpro [N-Term]	71.5599	18	8.838e-06	40.2	43.9	53.2	74.2	66.1	74	47.3	69	55.4	56.8	97.5	86.7	106.9	105.7	67.3	81.6
High	A2AGT5	Cytoskeleton-associated protein 5 OS=Mus musculus OX=10090 GN=Ckap5 PE=1 SV=1	TTLKEDDDKSGPIFIVVPNGK	3xTMTpro [K4; K9; K21]; 1xTMTpro [N-Term]	70.1366	16	8.838e-06																																	127	119.1	117.1	150.7	129.3	137.2	119.2	179.6	163	156.3
High	A2AGT5	Cytoskeleton-associated protein 5 OS=Mus musculus OX=10090 GN=Ckap5 PE=1 SV=1	VIEMERESK	1xTMTpro [K9]; 1xTMTpro [N-Term]	45.4149	1	0.001859	64.3	75.1	109.4	143.4	71.5	101.2	60	55	81.3	58.6	116.8	178.9	119.5	175.2	97.7	108.2	127.7	72.2	159.8	100.3	60.3	140.6	106.4	134.7	217.8	76.2	278.9	214.4	276.6	184.4	172.3	172.5
High	A2AGT5	Cytoskeleton-associated protein 5 OS=Mus musculus OX=10090 GN=Ckap5 PE=1 SV=1	VNDFLAEIFK	1xTMTpro [K10]; 1xTMTpro [N-Term]	98.1199	39	1.703e-05	35.5	49.9	48.3	54.2	43.4	45.3	42.2	41.3	46.8	53.1	99.5	90.5	87.1	94.2	60.6	69.2																	52.9	46	43.6	45.8	43.3	44.1	42	47.4	49.9	58.3
High	A2AGT5	Cytoskeleton-associated protein 5 OS=Mus musculus OX=10090 GN=Ckap5 PE=1 SV=1	VNDFLAEIFKK	2xTMTpro [K10; K11]; 1xTMTpro [N-Term]	97.617	24	3.33e-05	25	35	32.5	40.4	40.4	39.9	27.3	30.7	36.8	35.8	80.8	74.8	91.8	86.5	61.3	57.3
High	A2AGT5	Cytoskeleton-associated protein 5 OS=Mus musculus OX=10090 GN=Ckap5 PE=1 SV=1	VVGKDTNVMLVALAAK	2xTMTpro [K4; K16]; 1xTMTpro [N-Term]	82.2002	20	8.838e-06	43.3	46.4	57.8	67.8	54.9	70.2	60.4	53.6	56.4	61.2	88.5	75.7	75	84.6	74.9	78.9
High	A2AGT5	Cytoskeleton-associated protein 5 OS=Mus musculus OX=10090 GN=Ckap5 PE=1 SV=1	WNFTTPR	1xTMTpro [N-Term]	56.3838	10	0.002001	221.5	236.3	229.4	283.3	218.7	256.4	168.1	212.5	180.3	214.7	435.3	365.9	422	469	289.9	320.1	149	186.4	166.1	178.2	166.2	200.8	170.5	164.8	186.4	171.2	205.1	192.3	219.3	186	212.2	201.6	184.9	168.6	149.7	172	150.2	137.1	130.5	150.7	150.2	152.3
High	A2AGT5	Cytoskeleton-associated protein 5 OS=Mus musculus OX=10090 GN=Ckap5 PE=1 SV=1	WNFTTPRDEYIEQLK	1xTMTpro [K15]; 1xTMTpro [N-Term]	72.776	21	8.838e-06	177	204.8	223.9	276.5	219.3	270.1	181	223.9	203.1	215.6	414.9	341.6	383.3	424.2	314	303.5	198.5	220.8	233.3	216.8	210.2	246	261.3	215.5	248.4	197.8	426	310.8	454.4	354.4	310.1	324.5	234	213.5	137.3	144.7	109.9	96.2	104.9	118.3	121.1	130
High	A2AGT5	Cytoskeleton-associated protein 5 OS=Mus musculus OX=10090 GN=Ckap5 PE=1 SV=1	YSDTDIEPFLK	1xTMTpro [K11]; 1xTMTpro [N-Term]	72.3933	30	0.0001286																	124.7	146.3	150.3	147.9	142.5	159.6	155.4	135.3	180	134.1	270.5	210	291.8	228.6	198.7	209.3
High	A2AHC3	Calmodulin-regulated spectrin-associated protein 1 OS=Mus musculus OX=10090 GN=Camsap1 PE=1 SV=1	AAFLHVVK	1xTMTpro [K8]; 1xTMTpro [N-Term]	59.6856	54	2.218e-05	214.5	248.1	259.7	321.6	259.4	336.7	221	272	220.1	250.4	659.4	683.3	768.5	972.4	422.1	427.8	114.5	132.5	123.4	152	107.4	133.1	123.6	117.5	124.5	116.3	245.8	306.4	312.2	348.5	189	192.7	372	397.9	333.2	353.4	317.9	298.7	270.3	333.8	350.9	327.8
High	A2AHC3	Calmodulin-regulated spectrin-associated protein 1 OS=Mus musculus OX=10090 GN=Camsap1 PE=1 SV=1	AEEDEGR	1xTMTpro [N-Term]	15.5635	28	0.0005082	160.4	154.5	162.4	155.3	160	132.2	132.5	143.1	140.6	186.9	537.7	491	560.6	546.3	290.9	314.9																	48.9	33.7	35.9	38.1	32	33.3	23.1	28.5	35.5	36
High	A2AHC3	Calmodulin-regulated spectrin-associated protein 1 OS=Mus musculus OX=10090 GN=Camsap1 PE=1 SV=1	AYGLDNIPEDLRDPFYIDQYEQEHIKPPVIK	2xTMTpro [K26; K31]; 1xTMTpro [N-Term]	86.2449	23	8.838e-06																																	91.9	98	81.4	89.9	90.3	73.9	82.5	94.4	91.6	90.6
High	A2AHC3	Calmodulin-regulated spectrin-associated protein 1 OS=Mus musculus OX=10090 GN=Camsap1 PE=1 SV=1	CAAEGWR	1xCarbamidomethyl [C1]; 1xTMTpro [N-Term]	30.7403	17	0.001344																	249.3	241.9	238.1	285.8	210.3	271.3	205.6	246.4	239.5	213	416.5	450.4	463.3	537.4	293.8	285.9	366.6	352.8	284.1	317.5	264.2	243.5	219.2	270.2	278.8	250.3
High	A2AHC3	Calmodulin-regulated spectrin-associated protein 1 OS=Mus musculus OX=10090 GN=Camsap1 PE=1 SV=1	CLFDSYR	1xCarbamidomethyl [C1]; 1xTMTpro [N-Term]	53.7545	13	0.001703	150.6	157.5	193.4	231.6	182.5	217.2	155.1	191.7	173.3	172.9	231.8	233	228.7	284.9	214.5	216.8	125.2	137.3	132.9	158.8	148.8	175.6	163.8	181.1	161	137.7	178.9	227.5	234.5	242.4	164	180.4
High	A2AHC3	Calmodulin-regulated spectrin-associated protein 1 OS=Mus musculus OX=10090 GN=Camsap1 PE=1 SV=1	DPASLLASELVQLHMQLEEK	1xTMTpro [K20]; 1xTMTpro [N-Term]	97.8826	58	8.838e-06																	10.7	14.4	10.2	14.3	13.6	13.4	12.5	14.7	13.5	7	29.3	31.6	35.6	39.5	18.4	18.8
High	A2AHC3	Calmodulin-regulated spectrin-associated protein 1 OS=Mus musculus OX=10090 GN=Camsap1 PE=1 SV=1	EAGLSSSTITGK	1xTMTpro [K12]; 1xTMTpro [N-Term]	48.9868	39	8.838e-06	31.8	42	49.1	52.7	48.7	51.9	45.9	48.2	42.1	45.9	78.6	73.4	90.9	111	56.9	63.6	46.7	57.1	50.6	63	55.3	63.6	66.7	63.9	68.4	68.5	96.5	120.6	101.7	121.4	80.8	81.1	67.4	71	67.9	61.9	76.5	68.3	64.5	72.3	80.9	76.7
High	A2AHC3	Calmodulin-regulated spectrin-associated protein 1 OS=Mus musculus OX=10090 GN=Camsap1 PE=1 SV=1	EHTPVEEPLR	1xTMTpro [N-Term]	33.3474	41	7.513e-05	130.6	132.3	114.7	139.5	131.6	145.1	103.2	148.8	111.7	120.9	170.9	157.6	157.6	187.2	142.4	143.8																	125.3	112.3	105.9	107.7	118.5	100.6	101.2	135.7	128.2	119.5
High	A2AHC3	Calmodulin-regulated spectrin-associated protein 1 OS=Mus musculus OX=10090 GN=Camsap1 PE=1 SV=1	EVPSMADSLYNIR	1xTMTpro [N-Term]	67.128	76	8.838e-06	40.9	48.6	44.3	56.2	51.7	57.3	35.2	48	44.7	49.2	70	80.5	84.3	84.4	53.7	64.2	62.6	83.9	65.3	72.9	57.4	72.5	59.5	66.5	59.3	65.3	87.6	110.8	98.8	124.1	83.8	80.6	100.1	105.4	83.3	77.8	67	62.6	59.4	69.1	69.9	72.2
High	A2AHC3	Calmodulin-regulated spectrin-associated protein 1 OS=Mus musculus OX=10090 GN=Camsap1 PE=1 SV=1	FDTLPQGQAADGFFLHVGR	1xTMTpro [N-Term]	79.0707	67	8.838e-06	41.8	42.8	49.5	83.7	58.8	53.5	41	45.2	36.1	41.4	73.1	55.8	87.4	93.2	57.7	53.8																	74.4	67.3	66.3	76.8	68.9	69.9	58.7	57.3	76.1	71.1
High	A2AHC3	Calmodulin-regulated spectrin-associated protein 1 OS=Mus musculus OX=10090 GN=Camsap1 PE=1 SV=1	GAIGAWPDKK	2xTMTpro [K9; K10]; 1xTMTpro [N-Term]	54.1893	13	0.00153	135.1	151.9	165.5	205.2	191.4	219.8	175.3	185.6	182.8	181.8	368	396.4	392.7	484.4	265.9	266.9
High	A2AHC3	Calmodulin-regulated spectrin-associated protein 1 OS=Mus musculus OX=10090 GN=Camsap1 PE=1 SV=1	KQFNLIPAK	2xTMTpro [K1; K9]; 1xTMTpro [N-Term]	63.4185	15	5.606e-05	20.2	26.2	24	40.7	27	37.1	24.4	25.2	23.2	27.5	72.1	79.4	92.9	105.1	44.9	43.2	56.6	48	58.9	62.8	51.3	67.2	56	60.5	58.7	59.2	147.7	153	194.5	185.2	95.7	98.6	8.3	6.6	6.7	8.6	10.2	7	8	9.6	9.8	9.5
High	A2AHC3	Calmodulin-regulated spectrin-associated protein 1 OS=Mus musculus OX=10090 GN=Camsap1 PE=1 SV=1	LTGTGPK	1xTMTpro [K7]; 1xTMTpro [N-Term]	41.0466	22	0.0006109	115.1	126	141	158.2	157.8	162.5	138.8	132.3	146.1	148.9	278.9	262.5	275.9	344.8	207.7	198.1																	104.4	111.4	106.9	120.8	121.3	109.8	88.9	110.3	129.2	123.2
High	A2AHC3	Calmodulin-regulated spectrin-associated protein 1 OS=Mus musculus OX=10090 GN=Camsap1 PE=1 SV=1	NNCQDQK	1xCarbamidomethyl [C3]; 1xTMTpro [K7]; 1xTMTpro [N-Term]	21.4135	25	0.0005228	24.7	28.5	29.7	43.8	34.1	42.3	28.1	39.1	28.2	25.2	79.1	62.3	80.8	118	44.4	46.2	22.4	26.7	25.9	36	27.3	44.7	27.2	31.9	33.8	27.6	74.7	87.1	82.8	119.8	42.8	42.8	55.4	52.7	50	62.8	55.2	58.4	42.7	58.7	64.8	61.3
High	A2AHC3	Calmodulin-regulated spectrin-associated protein 1 OS=Mus musculus OX=10090 GN=Camsap1 PE=1 SV=1	SKTPTPSVETLPQSR	1xTMTpro [K2]; 1xTMTpro [N-Term]	43.5733	40	8.838e-06																	112.8	116.8	134.9	112.8	114.3	131.3	122.8	125.6	133.8	110.7	309.3	340.9	382.1	415.9	206.2	184.2	63	60.1	48.4	62.4	48.5	52.1	49	59.6	60.8	50.1
High	A2AHC3	Calmodulin-regulated spectrin-associated protein 1 OS=Mus musculus OX=10090 GN=Camsap1 PE=1 SV=1	SLLSNVNIEDEDEELVAIIR	1xTMTpro [N-Term]	96.2744	108	8.838e-06																	9.7	12.8	7.5	12.9	9.5	12.8	11.3	9.5	9.6	11.8	23.4	25.5	27.3	29.7	19	13	10.9	10.7	12.3	10.6	10.7	7.9	8.4	10.5	8.4	9
High	A2AHC3	Calmodulin-regulated spectrin-associated protein 1 OS=Mus musculus OX=10090 GN=Camsap1 PE=1 SV=1	SPSDPGGELPEK	1xTMTpro [K12]; 1xTMTpro [N-Term]	42.8175	42	6.035e-05																	54.8	72.3	68.2	78.8	63.6	74.3	55.8	63.6	60.6	62.5	96.1	118.9	113.3	119.7	90.7	82
High	A2AHC3	Calmodulin-regulated spectrin-associated protein 1 OS=Mus musculus OX=10090 GN=Camsap1 PE=1 SV=1	SPTVPTPGTK	1xTMTpro [K10]; 1xTMTpro [N-Term]	44.4436	27	0.001238																	81.9	109.5	100.6	133.2	107.5	145.8	124.9	130.6	152.8	135.4	240.6	273.8	264.3	321.5	172.7	163.6
High	A2AHC3	Calmodulin-regulated spectrin-associated protein 1 OS=Mus musculus OX=10090 GN=Camsap1 PE=1 SV=1	SSRPPVPISNATK	1xTMTpro [K13]; 1xTMTpro [N-Term]	43.8221	13	8.838e-06	179.2	188.3	196.1	275.4	212.9	236.3	177.9	213.6	165.3	167.4	439.4	399.7	494.2	603	297.8	280.9																	230.7	224.9	201.8	217.5	206.8	191.1	190.1	220	225	214.4
High	A2AHC3	Calmodulin-regulated spectrin-associated protein 1 OS=Mus musculus OX=10090 GN=Camsap1 PE=1 SV=1	TFVLSSCK	1xCarbamidomethyl [C7]; 1xTMTpro [K8]; 1xTMTpro [N-Term]	57.7772	16	0.0007282	89.4	90.5	110	121.2	110.4	124.1	89.9	106.2	90.7	97.6	177.8	139.4	197.2	219.5	127.2	132.7
High	A2AHC3	Calmodulin-regulated spectrin-associated protein 1 OS=Mus musculus OX=10090 GN=Camsap1 PE=1 SV=1	TSPQAPGLVASIR	1xTMTpro [N-Term]	54.4601	52	8.838e-06	65.1	69.3	94.3	101.8	84.7	95.4	67.5	81.3	63.9	74.9	107.1	132.7	104.1	168.6	92.6	100	78.3	101.3	84.8	101.2	93.3	102.9	98.6	95.9	91.7	101.7	92.6	114.7	91.7	103.5	110.3	99.6	127.9	155.2	116.9	132	133.2	124	99	133.5	114.7	113.2
High	A2AHC3	Calmodulin-regulated spectrin-associated protein 1 OS=Mus musculus OX=10090 GN=Camsap1 PE=1 SV=1	VCSLILK	1xCarbamidomethyl [C2]; 1xTMTpro [K7]; 1xTMTpro [N-Term]	69.8456	30	0.0003601	231.9	244.8	255.1	298.5	233.4	249.8	165.6	231	209.6	217.9	516.3	499.7	570.4	701.6	351.4	338.3	256.1	264.1	267.2	259.3	236.3	226.6	236.3	226.5	242.9	222.1	469.8	538.1	611.9	519.1	335.3	368.7	297.9	267.3	268.5	291.6	278.1	200	220.4	238.4	260.8	220.6
High	A2AHC3	Calmodulin-regulated spectrin-associated protein 1 OS=Mus musculus OX=10090 GN=Camsap1 PE=1 SV=1	VESLEALPILSR	1xTMTpro [N-Term]	84.1632	59	8.838e-06	10	11.8	17	13.9	12.5	11.2	13.8	9.5	11.5	13	31.2	24.9	36.2	42.6	19.7	22.2	12.8	20.1	15.2	12.7	12.1	13.5	12	13.2	13.5	11.4	25	34.7	35.1	37.6	19.2	18.3	18.8	11.9	14.8	17.6	14.6	13.1	13.3	14.1	15.9	17.5
High	A2AHC3	Calmodulin-regulated spectrin-associated protein 1 OS=Mus musculus OX=10090 GN=Camsap1 PE=1 SV=1	VSQTEEIPDQR	1xTMTpro [N-Term]	36.1152	47	8.838e-06	100.3	121.7	119.9	138.9	118.3	123.9	96.4	103.4	116.8	111.4	232.6	249.4	287.3	343.7	150.5	178.3	69.3	81.1	72.2	71.9	61.3	70.6	55.6	59.1	60.8	56.1	111.1	123.9	126.4	149.3	80.3	96.3	98.3	83.2	81.3	72.5	66.3	74.2	49.9	66.1	76.1	78.5
High	A2AHG0	Leucine zipper putative tumor suppressor 3 OS=Mus musculus OX=10090 GN=Lzts3 PE=1 SV=1	AGEISLLK	1xTMTpro [K8]; 1xTMTpro [N-Term]	65.8243	30	9.613e-05	38.3	39.9	41.3	52.8	49.4	52.6	38.3	42.7	55.7	54.5	176.1	159.2	151.7	167	73.2	88.8																	153.9	176.2	124.7	143.1	138.7	123	127.9	141.8	190.2	174.1
High	A2AHG0	Leucine zipper putative tumor suppressor 3 OS=Mus musculus OX=10090 GN=Lzts3 PE=1 SV=1	AQQGLQLQVLR	1xTMTpro [N-Term]	59.9775	40	8.838e-06	129.9	166.4	171.8	176.9	143.7	151.6	123.6	136.1	149.1	177.1	452.9	421.1	405.5	424.3	230.5	249.3	180.1	183.4	189.7	178.4	166.2	174.8	161.1	167.7	219.9	184.3	432.4	440.8	432.1	398.3	257.8	271.9	406.7	386.2	316.2	306	291.3	240.1	251.2	275.2	337.1	321.7
High	A2AHG0	Leucine zipper putative tumor suppressor 3 OS=Mus musculus OX=10090 GN=Lzts3 PE=1 SV=1	DSQADVSQK	1xTMTpro [K9]; 1xTMTpro [N-Term]	29.8441	33	2.218e-05	119.4	121.3	113.6	153.4	112.9	137.2	115.4	132.2	129	157.9	458.3	362.3	425	414	226.3	216.5
High	A2AHG0	Leucine zipper putative tumor suppressor 3 OS=Mus musculus OX=10090 GN=Lzts3 PE=1 SV=1	EKEEQLLSLR	1xTMTpro [K2]; 1xTMTpro [N-Term]	55.8814	2	0.0001094																	110.2	100.7	89.2	94.5	99.3	94.6	92.3	89.9	128.5	119.6	324.2	334.5	331.4	318.5	187	184.8	264.5	206.5	202.3	222.4	207.7	179.7	180.3	192.8	292.6	276.7
High	A2AHG0	Leucine zipper putative tumor suppressor 3 OS=Mus musculus OX=10090 GN=Lzts3 PE=1 SV=1	EPNHPPK	1xTMTpro [K7]; 1xTMTpro [N-Term]	26.1429	15	0.001889																	103.3	107.9	94.2	109.4	107.8	113	114.2	95.3	143.8	110.8	239.8	246.1	240.7	248.4	162.2	149.1	94	80.3	98	117.2	108.6	97.5	97.9	93.7	135.9	121.1
High	A2AHG0	Leucine zipper putative tumor suppressor 3 OS=Mus musculus OX=10090 GN=Lzts3 PE=1 SV=1	EQEVAALR	1xTMTpro [N-Term]	37.7461	14	0.00029																	38.3	40.1	29.3	31.2	35.9	41.5	34.8	33.2	48.8	45.9	97.7	96.4	90.8	96.2	44.8	53.7
High	A2AHG0	Leucine zipper putative tumor suppressor 3 OS=Mus musculus OX=10090 GN=Lzts3 PE=1 SV=1	GAAGGSSTPTPQHGEEK	1xTMTpro [K17]; 1xTMTpro [N-Term]	26.9649	30	8.838e-06	13.9	12.2	18.8	17.4	14.4	15.4	14	15.6	16.2	13.7	48.7	46.2	46	54.6	27	21.3
High	A2AHG0	Leucine zipper putative tumor suppressor 3 OS=Mus musculus OX=10090 GN=Lzts3 PE=1 SV=1	IGTAGYSSGSSGGGSGYQDLGTSDSGR	1xTMTpro [N-Term]	44.7768	126	8.838e-06	16.3	15.5	14.5	29.9	17.2	23.9	15.1	15.8	20.2	18.9	50	36.4	39.7	43.1	25.1	26.1	27.7	30.6	32.8	37.9	48.3	48.2	73.7	46	51.4	46	48.8	46.4	49.7	45.6	42.1	51.7	13.9	16.3	12.3	12.2	19.5	15.7	18.4	15.9	15.4	16
High	A2AHG0	Leucine zipper putative tumor suppressor 3 OS=Mus musculus OX=10090 GN=Lzts3 PE=1 SV=1	LLTTSGK	1xTMTpro [K7]; 1xTMTpro [N-Term]	50.2774	25	0.0004462																	144.9	155.4	140.1	175.9	163.4	176.2	174.6	169.1	199.2	184.5	327.4	341	325.5	332.2	233.4	241.6
High	A2AHG0	Leucine zipper putative tumor suppressor 3 OS=Mus musculus OX=10090 GN=Lzts3 PE=1 SV=1	LQAELAAER	1xTMTpro [N-Term]	44.5977	43	2.218e-05																	8.9	8.2	11.9	11.3	10.5	9.6	6.3	9.6	15.7	9.1	22.8	24.3	23	20.5	14.4	15.5
High	A2AHG0	Leucine zipper putative tumor suppressor 3 OS=Mus musculus OX=10090 GN=Lzts3 PE=1 SV=1	LSEIVGLR	1xTMTpro [N-Term]	68.665	15	0.0003877	137.3	153.5	141.7	178.3	143.3	164.7	125.5	151.7	171.5	196.6	491.7	448.9	461.7	493.6	249.4	261.1																	195.2	189.2	149.5	161.3	154.4	133.6	134.1	168.2	222.8	211.8
High	A2AHG0	Leucine zipper putative tumor suppressor 3 OS=Mus musculus OX=10090 GN=Lzts3 PE=1 SV=1	MEETKWEVCQK	1xCarbamidomethyl [C9]; 2xTMTpro [K5; K11]; 1xTMTpro [N-Term]	54.8456	9	0.0001094																																	219.6	222	175.7	175.8	160.3	142.4	143.8	177	235.7	250.4
High	A2AHG0	Leucine zipper putative tumor suppressor 3 OS=Mus musculus OX=10090 GN=Lzts3 PE=1 SV=1	QGASFAEER	1xTMTpro [N-Term]	26.3839	23	0.0001094	194.3	197.1	190.6	226.7	196	208	192.5	200	203.8	235.5	520.7	462.9	446.6	494.7	301.2	304.1
High	A2AHG0	Leucine zipper putative tumor suppressor 3 OS=Mus musculus OX=10090 GN=Lzts3 PE=1 SV=1	QGPAGLK	1xTMTpro [K7]; 1xTMTpro [N-Term]	40.8843	19	0.001391	277.1	310.1	292.3	362.9	291.7	292.9	250.3	311.4	314.9	335.8	946.8	770.5	910.7	900.3	525.7	491.6	329.9	342.8	341.6	336.7	364.8	364.9	350.1	332.7	393.1	333.9	905.6	867.6	890.3	847.4	541.7	504.4
High	A2AHG0	Leucine zipper putative tumor suppressor 3 OS=Mus musculus OX=10090 GN=Lzts3 PE=1 SV=1	QGPAGLKGGLDK	2xTMTpro [K7; K12]; 1xTMTpro [N-Term]	48.2267	20	6.573e-05																	12.4	12.3	11.5	14.9	8.9	15.4	9.3	14.9	19.8	15.7	37.1	44	29.1	29.3	18.2	22.5
High	A2AHG0	Leucine zipper putative tumor suppressor 3 OS=Mus musculus OX=10090 GN=Lzts3 PE=1 SV=1	QLQEEAAQLIR	1xTMTpro [N-Term]	63.7923	45	8.838e-06	121.6	133.6	133.8	175.4	121.7	148.1	108.7	135	167.2	176.2	340	325.7	281.5	322	208.2	194.7	57.2	44.2	72.1	39	73.6	52.9	88.1	47.9	85.4	48.3	81.8	79.6	69.4	59.2	57.3	64
High	A2AHG0	Leucine zipper putative tumor suppressor 3 OS=Mus musculus OX=10090 GN=Lzts3 PE=1 SV=1	QLQLSYVEMYQR	1xTMTpro [N-Term]	66.5905	59	8.838e-06	98.7	111.7	99.5	107.4	80.5	86.5	68.2	72.6	71.2	78.9	129	125.3	128	155.2	100.7	108	77.8	93.3	72.1	92.4	69.4	82.7	70.5	80	82.1	79.2	121.7	137.9	122.1	126.4	94.2	101.6
High	A2AHG0	Leucine zipper putative tumor suppressor 3 OS=Mus musculus OX=10090 GN=Lzts3 PE=1 SV=1	QREELEDKVAVCQK	1xCarbamidomethyl [C12]; 2xTMTpro [K8; K14]; 1xTMTpro [N-Term]	45.1001	2	2.218e-05	98.9	117.7	125.7	133.8	127	144.9	116	131.7	145.3	162.7	424.8	341.8	384.3	387.5	209.7	202.9
High	A2AHG0	Leucine zipper putative tumor suppressor 3 OS=Mus musculus OX=10090 GN=Lzts3 PE=1 SV=1	SGSSSSMGR	1xTMTpro [N-Term]	15.2431	21	6.573e-05																	92.8	86.2	81	88.4	76.2	105.2	89	94.5	153.9	107.2	358	323.8	331.1	312.4	170.5	166.2
High	A2AHL1	Anoctamin-3 OS=Mus musculus OX=10090 GN=Ano3 PE=1 SV=1	IAYLLTNLEYPR	1xTMTpro [N-Term]	96.0037	40	3.865e-05																	26.6	30.2	26.2	28.3	26.4	39.5	30.2	35.2	26	26.9	17.7	24	18.8	21.2	27.4	26.4
High	A2AHL1	Anoctamin-3 OS=Mus musculus OX=10090 GN=Ano3 PE=1 SV=1	IDYILVYR	1xTMTpro [N-Term]	74.63	25	0.0001794																	173.8	249.7	194	267.3	196.7	262	189.9	235.2	184.6	217.6	80.4	113.8	43.4	54.8	169.2	179.5	287.7	316.7	230.5	312.8	265.7	244.2	227.7	247.5	218.3	241.9
High	A2AHL1	Anoctamin-3 OS=Mus musculus OX=10090 GN=Ano3 PE=1 SV=1	IHIPWDTLCK	1xCarbamidomethyl [C9]; 1xTMTpro [K10]; 1xTMTpro [N-Term]	73.2344	30	5.039e-05	108.1	134.4	146.2	190	139.5	207	128	160.8	120.3	148.2	71.6	83	61.9	77.8	130	137	70	97.3	80.4	123	80.1	124.8	79.5	107.1	76.7	96.1	40.1	58.6	35.1	31	75.5	89.2	116.2	160.2	114.7	129.4	116.5	115.1	98.3	137.1	116.3	119.2
High	A2AHL1	Anoctamin-3 OS=Mus musculus OX=10090 GN=Ano3 PE=1 SV=1	IVYHMLER	1xTMTpro [N-Term]	57.0495	29	0.0002549	45.7	55.1	64.4	76.5	61.1	83.7	57.5	64.3	50	62.2	33.1	38.3	18.4	28.2	53.1	59.1
High	A2AHL1	Anoctamin-3 OS=Mus musculus OX=10090 GN=Ano3 PE=1 SV=1	LLNDFVTK	1xTMTpro [K8]; 1xTMTpro [N-Term]	74.2452	25	0.001203																	82	120.6	99.2	128.8	111	162.7	99.2	142.1	104.6	124.4	46.6	65.1	27.6	29.2	99.1	94.9
High	A2AHL1	Anoctamin-3 OS=Mus musculus OX=10090 GN=Ano3 PE=1 SV=1	QNENCLK	1xCarbamidomethyl [C5]; 1xTMTpro [K7]; 1xTMTpro [N-Term]	33.8861	22	0.001859																																	135.3	133.2	135.6	149	135.3	140.9	124.1	134.6	139.4	121.3
High	A2AHL1	Anoctamin-3 OS=Mus musculus OX=10090 GN=Ano3 PE=1 SV=1	RIDYILVYR	1xTMTpro [N-Term]	58.9995	36	6.573e-05																																	61.8	67.5	64.7	78.7	68.4	63.2	61.2	62.2	71.6	63.6
High	A2AI08	Taperin OS=Mus musculus OX=10090 GN=Tprn PE=1 SV=1	AAEVVVYEAPQPGR	1xTMTpro [N-Term]	51.9996	44	8.838e-06	46.9	50.1	59.6	64.5	70.8	76.6	60.8	65	61.7	66.7	82.2	88.6	71.8	104.3	67.4	72	60.7	87.1	74.2	92.6	87.7	111.4	107.2	100.7	100.2	98.5	113	130	134.4	151.6	105.4	121.2
High	A2AI08	Taperin OS=Mus musculus OX=10090 GN=Tprn PE=1 SV=1	SACCEPAHPDGTAGPGAR	2xCarbamidomethyl [C3; C4]; 1xTMTpro [N-Term]	24.153	72	8.838e-06	22.9	25.3	39.1	45.2	35.2	43.6	37.1	36.5	29.7	39.7	54.7	45.8	50.9	50.3	39.6	37.9
High	A2AIV2	Protein virilizer homolog OS=Mus musculus OX=10090 GN=Virma PE=1 SV=1	AHSGLPDNR	1xTMTpro [N-Term]	21.4013	42	2.218e-05																																	33.3	34.2	42.1	47	44.9	47	52.7	64.2	84.4	89.4
High	A2AIV2	Protein virilizer homolog OS=Mus musculus OX=10090 GN=Virma PE=1 SV=1	GLSYLQLK	1xTMTpro [K8]; 1xTMTpro [N-Term]	69.6495	29	0.000303	9.8	6.9	12.2	17.2	21.8	18.8	27.2	24.2	30.2	31.8	108.3	136.2	121.3	178	52.6	55.2	11.4	11	17.7	16.9	18.6	19.1	24	24.9	37.8	30.9	80.9	73.4	108	95.8	49.7	50	17.7	14.6	21.4	19.9	27.4	21.7	27.8	34.2	55	49
High	A2AIV2	Protein virilizer homolog OS=Mus musculus OX=10090 GN=Virma PE=1 SV=1	LAILHLINGTIK	1xTMTpro [K12]; 1xTMTpro [N-Term]	91.0835	32	8.838e-06																	11.9	17.3	14	16.5	17.3	17.4	15.7	27.2	30.8	24	60.3	71.5	84.2	78	38	39.4	19.4	22.3	21.9	21.1	28.5	20.6	30.3	28.1	45.5	42.5
High	A2AIV2	Protein virilizer homolog OS=Mus musculus OX=10090 GN=Virma PE=1 SV=1	LTELLDLYQEDR	1xTMTpro [N-Term]	89.9959	54	8.838e-06	18.2	22.1	22.2	22.6	22	26.3	20.4	25	23.5	27.7	57.6	54.4	58.3	67	34	37.8
High	A2AIV2	Protein virilizer homolog OS=Mus musculus OX=10090 GN=Virma PE=1 SV=1	QLLQSKEESPESLFLELEK	2xTMTpro [K6; K19]; 1xTMTpro [N-Term]	89.2244	29	6.573e-05																																	29	25.1	25.4	19.9	22	20	20.6	27.6	25.8	34.4
High	A2AIV2	Protein virilizer homolog OS=Mus musculus OX=10090 GN=Virma PE=1 SV=1	QNIDNLMTAEGVGLTTALR	1xTMTpro [N-Term]	82.2782	43	8.838e-06	82.4	87.8	91.5	78.5	75	82.8	62.9	65.9	68.1	60.7	85.4	78.8	86	124.8	84.6	86.8																	143.6	129	129.6	134.5	129.3	112.8	122.7	123.2	125.5	111.8
High	A2AIV2	Protein virilizer homolog OS=Mus musculus OX=10090 GN=Virma PE=1 SV=1	SPGDSVTR	1xTMTpro [N-Term]	20.9511	19	0.001223	39.8	42.8	53.6	57.7	80.5	81.1	60	71.8	76	97.6	258.9	285.1	293.5	371.1	135.3	125.1	38.8	42.6	51.2	53.5	69.5	65.9	77.7	70.6	109	87.8	260.4	228.8	308.1	261	140.9	127.5
High	A2AIV2	Protein virilizer homolog OS=Mus musculus OX=10090 GN=Virma PE=1 SV=1	TTFEIEISR	1xTMTpro [N-Term]	60.1133	30	2.218e-05	5.1	3.8	4.6	9.3	12.3	18	15.4	21.4	32.3	33.8	102.5	108.2	117.1	163.8	53.8	43.9	2.6	4.3		3.4	3.7	8.5	10.9	7.1	20.9	11.6	41.2	33.7	50.1	46.6	21.8	18.9	12.3	13.5	13.3	19.1	25.7	28.1	37	42.8	79.5	77.8
High	A2AJ88	Patatin-like phospholipase domain-containing protein 7 OS=Mus musculus OX=10090 GN=Pnpla7 PE=1 SV=1	GCAQVGILR	1xCarbamidomethyl [C2]; 1xTMTpro [N-Term]	45.5116	32	0.0001244																	65.6	77.3	84.3	92.5	90.1	124.7	105	128	137.4	135.8	71.3	84.6	26	29.8	90.1	100	100.4	103.1	103.8	101.1	108.7	108.3	117.6	139.9	160.3	181.1
High	A2AJ88	Patatin-like phospholipase domain-containing protein 7 OS=Mus musculus OX=10090 GN=Pnpla7 PE=1 SV=1	GDLVGVVETLTHQAR	1xTMTpro [N-Term]	82.5277	50	8.838e-06	53.4	54.9	74.7	89.1	87.9	96.7	78.2	91.5	97.1	102.3	87	85	59	60.2	85.7	76.7	41	61.9	56.1	57.5	61.5	60.7	64.5	63.6	60.9	69.7	52.3	70.4	56.4	47.7	61.3	65.9	80	71.8	82.8	77.7	90.8	70.9	78.7	94.5	95.5	90.7
High	A2AJ88	Patatin-like phospholipase domain-containing protein 7 OS=Mus musculus OX=10090 GN=Pnpla7 PE=1 SV=1	LAYVCCVR	2xCarbamidomethyl [C5; C6]; 1xTMTpro [N-Term]	51.9945	6	0.002761																																	20.1	22.5	24	28.8	33.4	28.4	34.4	40.7	44.5	52.5
High	A2AJ88	Patatin-like phospholipase domain-containing protein 7 OS=Mus musculus OX=10090 GN=Pnpla7 PE=1 SV=1	MLTGNAIALVLGGGGAR	1xTMTpro [N-Term]	92.0288	51	8.838e-06																	35.5	30.1	40.8	38.7	26.7	42.7	25.6	34.4	34.5	33.1	28.6	28	26.6	24.9	32.7	36.2	37.2	33.5	33.6	35	28.6	31	28.4	31.3	36.4	34.1
High	A2AJ88	Patatin-like phospholipase domain-containing protein 7 OS=Mus musculus OX=10090 GN=Pnpla7 PE=1 SV=1	QGDKSDCTYIVLSGR	1xCarbamidomethyl [C7]; 1xTMTpro [K4]; 1xTMTpro [N-Term]	50.093	35	8.838e-06	51.4	50	83.4	98.1	95.1	126.4	107.9	130.5	151.4	161.3	90.9	99.9	35	40.4	93.3	92.9	50.1	61	68.8	61.6	76.9	101.3	92.2	121	126.9	114.1	61.6	64.5	27	29.6	71.5	71.7
High	A2AJ88	Patatin-like phospholipase domain-containing protein 7 OS=Mus musculus OX=10090 GN=Pnpla7 PE=1 SV=1	QLILLHKEDGPVPSR	1xTMTpro [K7]; 1xTMTpro [N-Term]	54.13	12	8.838e-06																																	59.4	60.2	57.5	62.1	64.4	66.3	75.7	102.6	104	111.5
High	A2AJ88	Patatin-like phospholipase domain-containing protein 7 OS=Mus musculus OX=10090 GN=Pnpla7 PE=1 SV=1	VFQRPPDR	1xTMTpro [N-Term]	34.1931	2	0.003502																	82.5	91.7	97.8	105.3	102.1	132.7	103.8	119.7	134	139.7	101.9	125.2	92.5	113.1	111.3	116
High	A2AJA9	Apical junction component 1 homolog OS=Mus musculus OX=10090 GN=Ajm1 PE=1 SV=1	AAGPGGATLLAPSR	1xTMTpro [N-Term]	49.211	57	8.838e-06																																	54	62.2	40.5	43	42.5	36.8	36	40.9	44.9	45.2
High	A2AJA9	Apical junction component 1 homolog OS=Mus musculus OX=10090 GN=Ajm1 PE=1 SV=1	ALANELHPIK	1xTMTpro [K10]; 1xTMTpro [N-Term]	55.0443	39	8.838e-06																	391.4	444	324.9	363.7	279.3	277.4	221.3	196.3	174.9	168.5	181.7	203.1	203.3	187.3	275.8	271.6	473.7	424.3	379.2	366.4	334.2	273.2	251.3	281.9	284.7	249.8
High	A2AJA9	Apical junction component 1 homolog OS=Mus musculus OX=10090 GN=Ajm1 PE=1 SV=1	ALDWVASANLLDDIM	1xTMTpro [N-Term]	98.5321	35	6.035e-05																	30.1	31.1	33.9	33.1	25.1	21.4	22.2	18.9	25.1	21.4	22.6	22.8	19.3	18.8	25.7	25.2	71.9	75.4	51.1	54.3	41.9	36.2	38.4	38.6	34.8	38.5
High	A2AJA9	Apical junction component 1 homolog OS=Mus musculus OX=10090 GN=Ajm1 PE=1 SV=1	ASQGLATAPASPPVLQR	1xTMTpro [N-Term]	53.1862	53	8.838e-06	111.7	124.6	132.2	155.3	103.2	127.2	80.7	94.4	67.2	72.6	64.5	75.7	63.3	82	87.8	103.8
High	A2AJA9	Apical junction component 1 homolog OS=Mus musculus OX=10090 GN=Ajm1 PE=1 SV=1	AYGMPFVPR	1xTMTpro [N-Term]	65.293	19	0.001885	263.8	304.6	303.9	339.4	208.8	261.8	165.6	187.1	148.4	175.5	185	169.9	148.7	154.7	208	218.6	171.6	168.3	170.6	164.2	144.5	172.6	135.1	144.7	156.4	130.8	136.5	128.9	110.7	124.1	150.9	153.7
High	A2AJA9	Apical junction component 1 homolog OS=Mus musculus OX=10090 GN=Ajm1 PE=1 SV=1	ETTSWAR	1xTMTpro [N-Term]	32.2871	12	0.00165	214	248.5	246.7	290.3	190	228.1	150.8	174.1	184.6	187.3	316.9	330.7	262.7	323.9	225.5	227.9	349	335.9	293.6	281.5	220.4	272.6	215.5	211	217.6	188.2	288.5	298	302.6	301.7	295.2	300.3	690.8	612.3	471.4	472.1	370.8	316.9	302.9	339.2	332	303.8
High	A2AJA9	Apical junction component 1 homolog OS=Mus musculus OX=10090 GN=Ajm1 PE=1 SV=1	EVAFIHIQR	1xTMTpro [N-Term]	54.8354	50	2.218e-05	327.9	336.4	317.7	353.7	204.1	243.2	165.5	165.4	154.3	165.8	197.1	169.3	148.5	147.8	215.8	217.8	214.9	208.8	178.6	174	139.1	131	103.1	105.6	108.1	93.1	101.2	110.6	88.2	84.8	135.7	144.1	382.6	345.5	265.8	288.5	209.4	166.1	155.2	165	160.3	154.6
High	A2AJA9	Apical junction component 1 homolog OS=Mus musculus OX=10090 GN=Ajm1 PE=1 SV=1	FTPTTIYPTDR	1xTMTpro [N-Term]	59.3217	16	0.001762																																	430.8	394.9	325.9	315	246.3	213.7	181.6	196.7	194.2	210.5
High	A2AJA9	Apical junction component 1 homolog OS=Mus musculus OX=10090 GN=Ajm1 PE=1 SV=1	FTPTTIYPTDRR	1xTMTpro [N-Term]	51.4256	31	3.865e-05																	225.2	224.5	231	198.4	140.3	176.5	126	117.7	125.8	96	97.1	101.2	87	81.7	164	170.4	303.3	272.5	207.3	201.3	155.7	131.2	123.5	121.5	129.2	128.4
High	A2AJA9	Apical junction component 1 homolog OS=Mus musculus OX=10090 GN=Ajm1 PE=1 SV=1	HVLQFCR	1xCarbamidomethyl [C6]; 1xTMTpro [N-Term]	41.1273	8	0.001533	153.1	167.4	157.1	187.6	137.4	173.1	123	137.1	120.4	129.6	163	155.6	140.1	174.1	147.5	159.5
High	A2AJA9	Apical junction component 1 homolog OS=Mus musculus OX=10090 GN=Ajm1 PE=1 SV=1	IAPLCATPGR	1xCarbamidomethyl [C5]; 1xTMTpro [N-Term]	51.035	19	2.218e-05	161.2	154.4	148.5	174.8	96.2	104	62.7	71.8	54.1	68.4	78.7	62.1	70.2	73.9	93.4	88.3	109.8	109.7	87.5	90.5	61.9	65.7	45.8	49	45.4	41.9	38.9	46.5	42.4	42.1	77.9	66.7	361.4	293.7	232.8	215.6	157.5	126.6	108.1	119	95.4	104.8
High	A2AJA9	Apical junction component 1 homolog OS=Mus musculus OX=10090 GN=Ajm1 PE=1 SV=1	LDIKPDEAVLQHAAR	1xTMTpro [K4]; 1xTMTpro [N-Term]	57.882	29	8.838e-06	155.6	169.1	170.4	182.8	140.9	154.5	104	120.8	81.6	77.5	79.5	65.9	83.7	85.9	127.3	125.5																	284.6	242.2	219.2	212.5	169	169.4	123.3	145.4	116.3	131.3
High	A2AJA9	Apical junction component 1 homolog OS=Mus musculus OX=10090 GN=Ajm1 PE=1 SV=1	QPVSTVPEGPASSR	1xTMTpro [N-Term]	35.223	44	8.838e-06	139.6	150.8	150.1	169.1	101.4	108.9	78.7	79.5	58.2	75.9	92.3	88.5	90.9	104.5	121.5	116.1	184.8	185.3	154.4	158.3	111.6	116.4	75	76.7	74.9	65.3	80.5	73.6	74.3	74.1	106.3	116
High	A2AJA9	Apical junction component 1 homolog OS=Mus musculus OX=10090 GN=Ajm1 PE=1 SV=1	REDWDAHK	1xTMTpro [K8]; 1xTMTpro [N-Term]	31.3114	5	0.002522	414.6	431.7	407.6	473.5	274.6	339.8	198.5	241.4	177.7	219.8	313.3	328	539.9	455.2	343.3	368.2	481.3	487.6	408.9	392.2	287.2	318.9	217.4	215.1	200.4	183.3	190.5	213.7	222.7	189.4	300.6	337.2	469.8	428.6	326.6	322.7	226.2	193.2	158.7	188.7	156.3	171.6
High	A2AJA9	Apical junction component 1 homolog OS=Mus musculus OX=10090 GN=Ajm1 PE=1 SV=1	REPSYPALR	1xTMTpro [N-Term]	35.0512	32	0.0001388	157.2	173.9	231.1	243.1	190.5	216.2	147.3	165.9	151.5	132	136	138.5	119.3	152	165.8	172.6
High	A2AJA9	Apical junction component 1 homolog OS=Mus musculus OX=10090 GN=Ajm1 PE=1 SV=1	RGGSYYAGEVR	1xTMTpro [N-Term]	26.3529	41	3.33e-05	374.3	393.5	382.1	512.3	305.7	359.6	209.1	264.1	186.9	206.6	225.9	174.1	204.8	233.2	266.3	271.3	289.8	255.7	244.2	263.1	204.7	269.7	188.2	216.8	167.9	156.2	156.1	160.2	154.2	149.6	202.9	209.4	441.9	384.5	332.3	317.8	307.5	240	241.1	242.3	236	197
High	A2AJA9	Apical junction component 1 homolog OS=Mus musculus OX=10090 GN=Ajm1 PE=1 SV=1	RPPVVVNLSTSPR	1xTMTpro [N-Term]	49.8595	34	8.838e-06	194.7	242.4	320.3	330.6	199.6	336.3	142.8	186	186.8	173.9	175.6	213	218.1	255.4	210.5	223.9
High	A2AJA9	Apical junction component 1 homolog OS=Mus musculus OX=10090 GN=Ajm1 PE=1 SV=1	SYYGETTR	1xTMTpro [N-Term]	27.5498	16	0.0001645	234.7	234.4	225.6	245.5	163.8	181.9	120.9	139.4	126	130.6	167.4	163.6	138.2	170.9	164.8	173.2	197.9	192.5	180.6	170.9	153.1	167.6	142	148.9	152.9	122.4	169.1	169.1	143.4	156.8	169.6	165.3
High	A2AJA9	Apical junction component 1 homolog OS=Mus musculus OX=10090 GN=Ajm1 PE=1 SV=1	TDPPDLLVSTVYQDIK	1xTMTpro [K16]; 1xTMTpro [N-Term]	92.699	32	0.0001842	84.5	83.3	76	88.3	74.3	76.5	67.2	69.6	43.9	54	55	53.5	55.4	52.6	59.1	73.6
High	A2AJA9	Apical junction component 1 homolog OS=Mus musculus OX=10090 GN=Ajm1 PE=1 SV=1	TPTPSDLYCTDPR	1xCarbamidomethyl [C9]; 1xTMTpro [N-Term]	46.1473	39	0.0004657	28.5	30.1	44.8	39.2	30.8	39.3	23.1	23.7	26.7	28.6	38.8	37.8	40.4	38.5	43	31.8	48.3	46.2	41.2	46.9	34.4	41.2	31.5	36	38.3	30.9	40.5	44.6	43.8	44.1	36.4	46.4	57.6	49.3	38.4	35.9	33.7	31.3	26.2	31.1	35.2	32.9
High	A2AJA9	Apical junction component 1 homolog OS=Mus musculus OX=10090 GN=Ajm1 PE=1 SV=1	VYEQLCEFVEANRR	1xCarbamidomethyl [C6]; 1xTMTpro [N-Term]	73.7616	33	8.838e-06	101.2	116.9	100.5	124.9	79.2	87.9	63.9	75.8	64.8	72.5	66.6	64	49.2	52.1	86.2	79.3																	451.3	440.4	320.1	326.2	255.1	186.1	188.3	185.2	162.5	172.6
High	A2AJA9	Apical junction component 1 homolog OS=Mus musculus OX=10090 GN=Ajm1 PE=1 SV=1	YVPEEPR	1xTMTpro [N-Term]	37.5679	24	0.002651	60.5	60.9	59.6	73.3	46.8	46	29.1	33.3	31.4	28.8	27.1	36.7	28	30.4	39.5	48.4																	122.7	109.4	81	81.4	67	59.7	43.3	46.6	42.5	47.2
High	A2AJI0	MAP7 domain-containing protein 1 OS=Mus musculus OX=10090 GN=Map7d1 PE=1 SV=1	AEREAEAR	1xTMTpro [N-Term]	14.9683	18	0.001344	5.7	8.2	12.7	13.3	17.5	16.9	21.5	13.9	25.4	12.9	52	72.5	56	95.7	24.6	31.5
High	A2AJI0	MAP7 domain-containing protein 1 OS=Mus musculus OX=10090 GN=Map7d1 PE=1 SV=1	AGASLAPGPHPDR	1xTMTpro [N-Term]	31.0932	76	8.838e-06	34.7	33.4	59.8	73.3	61.8	72.1	68.9	78	99.9	106.5	154.8	153	125.9	143.2	96.6	95.1	38.3	42.8	44.9	54.6	58.1	64	79.6	63	87.6	81.4	148.2	161	140	169	90.7	85.7	51.3	37	46.3	53.2	60.9	52.2	61.3	71.3	103.8	98.4
High	A2AJI0	MAP7 domain-containing protein 1 OS=Mus musculus OX=10090 GN=Map7d1 PE=1 SV=1	AQAEQEEQER	1xTMTpro [N-Term]	18.1844	29	8.838e-06	100.8	105	162.9	183.2	151	162.2	130.7	150.4	134.8	152.2	134.8	128.1	99.8	105.1	142.1	156.7	15	21.8	14.3	17.6	23.5	21.6	24.3	25.5	23.5	29.8	66.7	64	72.8	89	42.4	38.2	86.7	53.7	73.1	79.3	74.4	66.4	65.1	75	83.5	79
High	A2AJI0	MAP7 domain-containing protein 1 OS=Mus musculus OX=10090 GN=Map7d1 PE=1 SV=1	AVETRPSGLQK	1xTMTpro [K11]; 1xTMTpro [N-Term]	37.9279	4	0.004451																																	90.8	85.5	102.8	113.8	150.7	144.9	152.7	185.7	251.8	239.6
High	A2AJI0	MAP7 domain-containing protein 1 OS=Mus musculus OX=10090 GN=Map7d1 PE=1 SV=1	AVVQPPQVTEVL	1xTMTpro [N-Term]	76.5798	26	0.00151	197.7	233.9	218.7	268.2	219.1	256.7	180.6	208.7	171.7	188	201.8	206.7	191	238.1	220.6	242																	280.7	290.8	188.4	182	167.1	143.4	136.5	163.9	151.1	145.5
High	A2AJI0	MAP7 domain-containing protein 1 OS=Mus musculus OX=10090 GN=Map7d1 PE=1 SV=1	AVWLEKEEK	2xTMTpro [K6; K9]; 1xTMTpro [N-Term]	56.8994	18	0.0005082																																	137.5	156.8	140.4	140.2	192.1	189.5	193	217.5	316.9	301
High	A2AJI0	MAP7 domain-containing protein 1 OS=Mus musculus OX=10090 GN=Map7d1 PE=1 SV=1	CSVSAVNLPK	1xCarbamidomethyl [C1]; 1xTMTpro [K10]; 1xTMTpro [N-Term]	54.5637	40	8.838e-06	195.3	204.5	238.6	327.5	249.7	307.2	236.6	267.4	328.7	283.8	709.2	618.6	638.1	930.2	442.1	418.8	52.6	53.6	58.6	82.2	62.5	88.6	79.8	91.2	118.6	100.4	236	240.1	226.6	291.7	127.2	108.3	126	147.1	115.6	121.8	129.3	125.1	143.9	156.9	199	183.9
High	A2AJI0	MAP7 domain-containing protein 1 OS=Mus musculus OX=10090 GN=Map7d1 PE=1 SV=1	CTPSGERPER	1xCarbamidomethyl [C1]; 1xTMTpro [N-Term]	18.2763	4	0.006012	7.8	9	11.6	16.1	13.4	15.3	16.2	22.3	21.9	13.3	57.1	49.4	60.8	75.6	36.9	24.8	15.4	12.2	16	20.6	14.9	22	20.7	27.3	36.8	29.4	78.1	73.2	77.2	92.7	39.6	35	8.2	8.3	8.3	8.3	7.7	11.1	12.7	15.5	24.1	16.6
High	A2AJI0	MAP7 domain-containing protein 1 OS=Mus musculus OX=10090 GN=Map7d1 PE=1 SV=1	EEQERQER	1xTMTpro [N-Term]	13.1638	6	0.001245	33.3	28.1	39.7	53.1	55.8	50.7	54.8	76.6	74.7	88.6	291.6	220.5	287.6	304.8	128.5	134																	44.5	27.9	53	61.9	73.8	65.9	57	81.9	138.5	112.6
High	A2AJI0	MAP7 domain-containing protein 1 OS=Mus musculus OX=10090 GN=Map7d1 PE=1 SV=1	EKAQAEQEEQERLQK	2xTMTpro [K2; K15]; 1xTMTpro [N-Term]	37.6576	10	0.0001526	29.8	28.6	32.7	42.3	45.4	48.1	36.9	49.6	47.6	32.8	104.6	106.6	111.5	135.7	58.8	58.1																	34.6	35.5	31.6	33.2	38.9	26.7	58.6	47.6	68.8	59.5
High	A2AJI0	MAP7 domain-containing protein 1 OS=Mus musculus OX=10090 GN=Map7d1 PE=1 SV=1	ERYEAAIQR	1xTMTpro [N-Term]	28.1471	20	6.035e-05	24.7	24.7	23.9	36	29.8	36	24.8	33.7	38.5	46.2	95.8	111	120.7	140	54.3	59.4	24.6	28	26.9	32.8	30.4	40.4	33.4	35.6	46.7	40.5	109.3	130.4	119.3	142.6	63.1	64.1	35.1	38.3	43.4	39.9	47.7	48.1	61.2	61.7	87.4	91.9
High	A2AJI0	MAP7 domain-containing protein 1 OS=Mus musculus OX=10090 GN=Map7d1 PE=1 SV=1	ESPSPSGPEDKNHR	1xTMTpro [K11]; 1xTMTpro [N-Term]	24.0502	11	3.33e-05																																	24.8	18.5	22.8	32.7	38.2	34.4	36.2	54	69.4	64.4
High	A2AJI0	MAP7 domain-containing protein 1 OS=Mus musculus OX=10090 GN=Map7d1 PE=1 SV=1	ESPSPSGPEDKNHR	1xDeamidated [N12]; 1xTMTpro [K11]; 1xTMTpro [N-Term]	24.3316	17	7.115e-05																	17.7	17	29.8	25.6	31.8	40.3	32.8	37.8	38.6	33.1	40.6	33.1	33.5	40.8	37	37.8
High	A2AJI0	MAP7 domain-containing protein 1 OS=Mus musculus OX=10090 GN=Map7d1 PE=1 SV=1	ESPSPSGPEDKNHRK	2xTMTpro [K11; K15]; 1xTMTpro [N-Term]	25.7997	2	0.002296																	15.7	13	12.9	13.7	18.7	21.4	26.9	30.3	25.7	26.1	54.8	68.8	67.3	74.9	35.1	35.6
High	A2AJI0	MAP7 domain-containing protein 1 OS=Mus musculus OX=10090 GN=Map7d1 PE=1 SV=1	ESPSPSGPEDKNHRK	1xDeamidated [N12]; 2xTMTpro [K11; K15]; 1xTMTpro [N-Term]	27.4731	6	0.002991																																	28.5	27.2	23.3	27.4	32.1	24.5	30	34.8	45	35.6
High	A2AJI0	MAP7 domain-containing protein 1 OS=Mus musculus OX=10090 GN=Map7d1 PE=1 SV=1	ETAANNSGPDPVK	1xTMTpro [K13]; 1xTMTpro [N-Term]	36.1167	46	8.838e-06	131.8	142.6	173.7	188.2	193.9	201	166.1	211.8	186.6	224.8	488.5	418.6	440.8	545.5	294.4	309.8
High	A2AJI0	MAP7 domain-containing protein 1 OS=Mus musculus OX=10090 GN=Map7d1 PE=1 SV=1	GPTPTATGPR	1xTMTpro [N-Term]	26.5622	19	0.001325	31.3	25.1	42.2	50.8	46.7	42.6	49	44	76.7	69.1	225.7	224.7	243.1	261.6	114.3	104.1	14.3	11.1	14.4	15.9	16.6	25.4	20.7	23.5	32.8	30.7	72.1	73	76.5	77.8	44	33.9	36.8	29.2	41.5	39.8	44.1	44.2	40.9	51.6	86.2	81.9
High	A2AJI0	MAP7 domain-containing protein 1 OS=Mus musculus OX=10090 GN=Map7d1 PE=1 SV=1	GTTASPK	1xTMTpro [K7]; 1xTMTpro [N-Term]	27.4859	16	0.001546																	40.3	47.3	37.9	32.2	30	32.9	31.2	34.7	45.6	33.3	91.2	112.7	110.6	118.4	56	63.2	62.9	75.9	59.9	61.2	60.6	55.2	62.6	67.9	97.7	90.9
High	A2AJI0	MAP7 domain-containing protein 1 OS=Mus musculus OX=10090 GN=Map7d1 PE=1 SV=1	HFQKEEQER	1xTMTpro [K4]; 1xTMTpro [N-Term]	26.1199	6	0.00038	46.9	38.1	73.6	80	104.2	86.4	74.3	91.4	89.3	112.3	311.3	231.4	298.6	380.9	156.2	161.6	45.1	60.4	49.7	64.3	77	82.3	84	90.6	118	111.1	169.8	198.5	218.5	257.3	124.8	124.3	74.3	60.7	76.6	103.5	119.9	119.4	99.5	156.3	196.8	179.4
High	A2AJI0	MAP7 domain-containing protein 1 OS=Mus musculus OX=10090 GN=Map7d1 PE=1 SV=1	KAVVQPPQVTEVL	1xTMTpro [K1]; 1xTMTpro [N-Term]	71.3152	15	0.0001094	30.8	33.6	41.5	46.4	38.8	49.7	41.3	44.6	49	48.9	97.1	111.8	101.1	145.2	62.8	72.5	79.3	83.5	78.8	93.9	94.8	103.5	104.5	104.3	118.9	99.5	163.6	189.7	182.4	197.2	132.9	138.7	94.5	94.4	92.7	101.7	97.8	93.4	88.5	101.9	111	109.2
High	A2AJI0	MAP7 domain-containing protein 1 OS=Mus musculus OX=10090 GN=Map7d1 PE=1 SV=1	KAVWLEK	2xTMTpro [K1; K7]; 1xTMTpro [N-Term]	58.361	5	0.0004631	107	134.9	142.7	177.4	202.9	211	149.8	214.7	185.8	252.1	514.2	548.1	577.4	779.8	346.1	338.6	103.4	112.6	117.3	135.7	125.8	163.9	139.5	156.4	196.2	194.3	361.2	438.9	391.2	433.5	232	241.1	242.3	242.9	210.1	223.8	291.2	251.7	236.6	316	419.9	413.6
High	A2AJI0	MAP7 domain-containing protein 1 OS=Mus musculus OX=10090 GN=Map7d1 PE=1 SV=1	KPGAGGSPALAR	1xTMTpro [K1]; 1xTMTpro [N-Term]	32.1387	4	0.0004252																	97	116.5	124.5	143.6	135	174.6	152.6	167.7	218.1	204	442.4	526.6	452.3	529.8	270.4	261.2	123.5	112	123.6	143	160.7	139.5	146.4	164.7	276.4	225.2
High	A2AJI0	MAP7 domain-containing protein 1 OS=Mus musculus OX=10090 GN=Map7d1 PE=1 SV=1	KSEAAETK	2xTMTpro [K1; K8]; 1xTMTpro [N-Term]	30.4369	7	0.0002864	131	139.9	181.8	191.4	301.2	241	242.8	309.7	301.3	324.6	900.1	802.3	1109.1	1262.5	507.2	500.3																	157.6	136.8	131.8	167.6	182.5	166.1	174.7	213.9	259.7	270.4
High	A2AJI0	MAP7 domain-containing protein 1 OS=Mus musculus OX=10090 GN=Map7d1 PE=1 SV=1	LEATPVQK	1xTMTpro [K8]; 1xTMTpro [N-Term]	48.0134	32	3.33e-05	87.7	78	107.8	121.9	122.5	119.7	112.7	139.8	128.6	143.6	336.7	280.2	351.5	389.5	194.1	191	104.4	108.4	92.8	126.7	117.8	143.1	151.6	141.7	205.3	191.7	369.2	391.3	393.2	434.5	197.8	210.6	136.8	137.2	109.9	120.8	145.5	133	96.4	149.5	208	195.3
High	A2AJI0	MAP7 domain-containing protein 1 OS=Mus musculus OX=10090 GN=Map7d1 PE=1 SV=1	LMTPTLSFLAR	1xTMTpro [N-Term]	87.4206	31	4.494e-05	66.4	78.4	88	111.1	90.7	113.8	85.5	97.6	124.2	124.4	337.8	355.6	353.4	403.4	172.5	178.4	166.1	229.5	203.6	222	212.4	268.6	251.2	271.4	354.4	330.6	780.8	875.2	830.2	958	438.8	456.5	162.2	224.8	155.8	156.8	220	172.2	185.3	201	280.6	267.9
High	A2AJI0	MAP7 domain-containing protein 1 OS=Mus musculus OX=10090 GN=Map7d1 PE=1 SV=1	LMTPTLSFLAR	1xOxidation [M2]; 1xTMTpro [N-Term]	78.6651	22	0.0001194																																	19.5	25	25.8	22	20.5	16.8	14.8	18.3	22.1	17.7
High	A2AJI0	MAP7 domain-containing protein 1 OS=Mus musculus OX=10090 GN=Map7d1 PE=1 SV=1	LSTGSELSPK	1xTMTpro [K10]; 1xTMTpro [N-Term]	49.8294	43	8.838e-06																	124.2	147.8	135.5	146.9	145.8	192	188.4	173.3	221.7	193.4	378.2	402.7	417.9	443.2	247.1	247.2	222.3	257.8	249.6	271.5	291.5	285.6	328.1	397.9	557.1	558.8
High	A2AJI0	MAP7 domain-containing protein 1 OS=Mus musculus OX=10090 GN=Map7d1 PE=1 SV=1	MREEQLAR	1xTMTpro [N-Term]	27.3736	22	0.0001146	83.2	78.7	117.2	117.5	135.4	128.5	133.1	140.6	174.2	177.7	505.1	491.3	548.3	667.1	274.3	273	95.1	136.5	148.1	132.2	141.1	170.6	179	160.4	194.6	196.8	395.7	494.4	427.5	518.2	270.1	277.1	27	29.9	35.8	25.6	38.5	32.3	30.1	50.1	61.6	61.7
High	A2AJI0	MAP7 domain-containing protein 1 OS=Mus musculus OX=10090 GN=Map7d1 PE=1 SV=1	MREEQLAR	1xOxidation [M1]; 1xTMTpro [N-Term]	20.5857	7	0.00516	120.9	127.5	160.7	146.7	152	157.2	140.7	154.4	177.5	178.2	348.8	323.4	323.2	379.2	227.3	225	52.5	64.2	56.8	56	67.3	75.6	81.4	82.7	100.5	99.7	206.2	219.5	237.9	245.6	117.5	125.4	129.6	123.1	135.4	114.3	153.3	116.6	164.1	154.6	327.2	261.6
High	A2AJI0	MAP7 domain-containing protein 1 OS=Mus musculus OX=10090 GN=Map7d1 PE=1 SV=1	QKEEAEAR	1xTMTpro [K2]; 1xTMTpro [N-Term]	21.9455	6	0.000586	118.3	98.5	137.7	170.7	251.7	214.5	185.3	274.7	227.8	266.7	703.3	533.4	760.5	800.4	383.4	375.6	26.3	41.9	31.4	39.4	42.6	47.3	56.7	54.5	48.6	70.1	134.3	186.1	167.8	212.6	92.5	90.6	50	35	48.2	48.5	63.3	59.6	78.2	94.8	114.8	114.4
High	A2AJI0	MAP7 domain-containing protein 1 OS=Mus musculus OX=10090 GN=Map7d1 PE=1 SV=1	QLPLEPGNPTGQISPQPAPPQEECPSSEAK	1xCarbamidomethyl [C24]; 1xTMTpro [K30]; 1xTMTpro [N-Term]	63.8135	74	8.838e-06	20.6	27.4	40.8	44.4	43.7	45.1	41.3	44.9	50.1	54.6	118.1	117.4	112.9	174.1	72.8	80.5	73.1	77.1	90.9	94.7	87.9	113.6	111.2	108.1	143.4	114.5	227	281.4	257.2	271.3	169.8	173.8	80.4	79.2	84.1	90.5	102	97.6	102.9	113.9	152.2	133.5
High	A2AJI0	MAP7 domain-containing protein 1 OS=Mus musculus OX=10090 GN=Map7d1 PE=1 SV=1	QSLPASIRPR	1xTMTpro [N-Term]	38.2505	7	9.049e-05	150	173.5	205	228.7	217.5	253.2	212.4	225.2	289.7	272.5	707.7	654.5	708.4	876.1	405.2	373	172.7	178.4	182.1	235.4	204.3	275.2	250.6	276.2	322.6	293.9	614.3	680.9	647.5	778.1	362.8	368.5	138.3	119.6	127.5	126.2	162.4	138.4	164	182.1	260.1	231.3
High	A2AJI0	MAP7 domain-containing protein 1 OS=Mus musculus OX=10090 GN=Map7d1 PE=1 SV=1	RAALEER	1xTMTpro [N-Term]	22.4809	13	0.003517	9.7	14.4	13.8	14.6	14.8	18.8	15.2	14.5	16.1	17.9	39.7	48.2	48.7	54	23	22.1																	9	12.3	6.5	6.5	11.7	7.4	13.9	12.3	20.3	16.7
High	A2AJI0	MAP7 domain-containing protein 1 OS=Mus musculus OX=10090 GN=Map7d1 PE=1 SV=1	RKPGAGGSPALAR	1xTMTpro [K2]; 1xTMTpro [N-Term]	27.678	11	0.0008007	54.7	70.5	81.5	104.9	84.6	103.1	76.8	98.4	108.3	119.3	330.4	342	347.4	459.5	182.9	180.5	82.5	95.1	104.8	115.4	103.4	121.9	119.4	128.4	162.5	148.6	304.6	348.3	324.3	358.6	173.9	171.4	253.5	281	225	243.2	294.8	269.3	286.8	329.4	482.4	415.2
High	A2AJI0	MAP7 domain-containing protein 1 OS=Mus musculus OX=10090 GN=Map7d1 PE=1 SV=1	RLEATPVQK	1xTMTpro [K9]; 1xTMTpro [N-Term]	39.5439	8	0.0006338	182.2	128.4	261.4	220.5	457.3	288.2	422.3	334.7	461.8	389.2	592.4	470.8	532.4	593.1	437.6	447.8																	355.6	279	457.8	377.7	876.2	500.5	705.3	623.4	1055.1	654.5
High	A2AJI0	MAP7 domain-containing protein 1 OS=Mus musculus OX=10090 GN=Map7d1 PE=1 SV=1	RQSLPASIRPR	1xTMTpro [N-Term]	30.2129	10	0.0001568																	86.9	107.2	116.5	106.6	106.7	135.6	128	141.1	163.6	150.4	174.7	213.4	155.2	176	144.8	167
High	A2AJI0	MAP7 domain-containing protein 1 OS=Mus musculus OX=10090 GN=Map7d1 PE=1 SV=1	SASASPLTPCSAPR	1xCarbamidomethyl [C10]; 1xTMTpro [N-Term]	39.1257	70	8.838e-06	71.9	84.2	103.6	123.3	107.6	134.1	108.7	120.4	130.7	126.6	279.3	299.4	305.6	378	172.9	173.8	92.7	124	135.4	161.1	141.7	236.2	180.6	255.3	249.4	281.4	297	383.3	290.9	350.4	230.8	227.4	108.2	101.2	97.2	114.9	112.8	103.1	124.9	144.2	216	182.2
High	A2AJI0	MAP7 domain-containing protein 1 OS=Mus musculus OX=10090 GN=Map7d1 PE=1 SV=1	SAVTLPR	1xTMTpro [N-Term]	40.6702	25	0.0009532	352.4	369.8	312.3	391.3	257.3	292.8	238.7	262.8	310.8	313.1	687.5	756.1	698.8	867.6	493.2	470.9	72.1	100.1	97.6	96.1	101.5	116	109.8	108.7	167.5	146.7	344.4	378	348.2	412.6	190.2	196.3	544.1	625.9	277.4	328.9	180.6	170	170.8	185.5	252.7	231.5
High	A2AJI0	MAP7 domain-containing protein 1 OS=Mus musculus OX=10090 GN=Map7d1 PE=1 SV=1	SEAAETK	1xTMTpro [K7]; 1xTMTpro [N-Term]	26.7772	27	0.0001568																	57.6	79.3	68.6	85	94.1	109.9	120.1	112.5	138.1	120.2	251.2	292.7	298.6	368.2	168.7	147.5
High	A2AJI0	MAP7 domain-containing protein 1 OS=Mus musculus OX=10090 GN=Map7d1 PE=1 SV=1	SLQLSAWESSIVDR	1xTMTpro [N-Term]	77.615	53	8.838e-06	25.1	33.6	34.9	47.5	36	56	40	41.5	55.4	53.1	100.4	104.5	103.3	121.6	67.4	59.3	44.9	54.7	54.6	50.6	43.9	64.9	44.5	62.3	81.7	74.8	150.7	176.1	160.8	184.7	84.4	96.6	50.7	54.9	52.4	57.3	66.6	61.3	64.4	64.1	71	75.9
High	A2AJI0	MAP7 domain-containing protein 1 OS=Mus musculus OX=10090 GN=Map7d1 PE=1 SV=1	SRGPTPTATGPR	1xTMTpro [N-Term]	20.6938	22	0.0009382	99.9	116.4	136.9	187.1	133.3	166.9	103.6	131.2	142.8	142.6	313.8	345.8	324.9	433	203.6	195.5	66.4	78.1	91.5	75.3	86.6	97.3	99.7	105.8	111.8	99.7	276.1	299.1	246.3	339.8	147.5	147
High	A2AJI0	MAP7 domain-containing protein 1 OS=Mus musculus OX=10090 GN=Map7d1 PE=1 SV=1	SSATLWNSPSR	1xTMTpro [N-Term]	45.0188	39	8.838e-06	122.9	147.1	187.2	215.7	207.3	242.8	186.1	211.2	273.4	275.2	807.7	794.5	810.1	1049	396	397.4	172.7	199.5	203.6	221.5	212.3	272.5	278.7	292.8	367.7	334.2	801.5	921.9	844.5	1011.1	416.9	439.6	135.3	129.8	123.5	139.3	152.7	139.3	162.5	177	258	217.9
High	A2AJI0	MAP7 domain-containing protein 1 OS=Mus musculus OX=10090 GN=Map7d1 PE=1 SV=1	TAEGLLPFAEAEAFLKK	2xTMTpro [K16; K17]; 1xTMTpro [N-Term]	97.625	10	8.838e-06																																	174.8	195.9	167.3	190.1	223.1	194.5	253.4	277.1	409.4	361.1
High	A2AJI0	MAP7 domain-containing protein 1 OS=Mus musculus OX=10090 GN=Map7d1 PE=1 SV=1	THPSAAVPVCPR	1xCarbamidomethyl [C10]; 1xTMTpro [N-Term]	27.6547	7	0.00342																	51.5	47	48.6	57.8	50.1	61.3	40.8	57.3	53	47.7	73.3	109.9	92.6	96.7	67.1	62.6
High	A2AJI0	MAP7 domain-containing protein 1 OS=Mus musculus OX=10090 GN=Map7d1 PE=1 SV=1	VEPGPGAPAAVLAR	1xTMTpro [N-Term]	54.7552	40	8.838e-06	164.4	186.3	216	248.3	231.6	237.9	226.6	222.6	280.7	297.7	729.6	649.5	716.6	807.9	405.8	384.6	213.3	267.7	259.7	280.8	279.5	318.8	323.1	313.5	390.7	387.5	786.6	901.8	894.5	988.7	471.5	490.3	338.2	271.3	324.3	334.7	361.1	320.1	354.2	380.7	528.3	484.8
High	A2AJI0	MAP7 domain-containing protein 1 OS=Mus musculus OX=10090 GN=Map7d1 PE=1 SV=1	YEAAIQR	1xTMTpro [N-Term]	33.9916	22	0.002557	159.8	176.9	208.9	257.8	259.2	293	244	287.4	382.9	391.1	1124.4	1111.9	1075	1350	515.1	549.2	75.5	103.7	94.4	122.3	105.1	132.5	146.5	150.9	201.3	166.1	404.2	458.2	432.3	514.2	227.2	215	112.5	106	96.4	120.3	135.1	112.9	140.5	166.9	228.3	215.6
High	A2AJK6	Chromodomain-helicase-DNA-binding protein 7 OS=Mus musculus OX=10090 GN=Chd7 PE=1 SV=1	AVLQSMSGR	1xTMTpro [N-Term]	45.132	13	0.0045																	20.9	25.1	18.2	24	17.1	26.7	19.2	15.2	24.6	26.2	36.7	47	38.7	55	29.4	31.9
High	A2AJK6	Chromodomain-helicase-DNA-binding protein 7 OS=Mus musculus OX=10090 GN=Chd7 PE=1 SV=1	FVFLLCTR	1xCarbamidomethyl [C6]; 1xTMTpro [N-Term]	87.7584	6	0.002414
High	A2AJL3	FGGY carbohydrate kinase domain-containing protein OS=Mus musculus OX=10090 GN=Fggy PE=1 SV=1	AALVDQR	1xTMTpro [N-Term]	32.8945	2	0.005824	13.7	13.1	12.9	15.4	16.5	17.8	17.2	13.5	20.7	18.9	41.2	44.1	54.2	52.5	22.7	17.4
High	A2AJL3	FGGY carbohydrate kinase domain-containing protein OS=Mus musculus OX=10090 GN=Fggy PE=1 SV=1	GLLLAFAEQPIK	1xTMTpro [K12]; 1xTMTpro [N-Term]	94.1102	39	2.218e-05	12.1	14.2	12.2	15.1	16.2	16.2	14.8	12	12.9	11.4	16.9	14.2	17.3	17.5	15.1	17.5	16.4	23.3	21	16.9	19.1	18.1	18.2	21.8	16.7	16.9	15.5	11.7	12.9	12.7	17.1	15.9	18.9	20.4	19.3	15.1	21.9	16.1	16.6	23.3	18.5	16.5
High	A2AJL3	FGGY carbohydrate kinase domain-containing protein OS=Mus musculus OX=10090 GN=Fggy PE=1 SV=1	GLLLAFAEQPIKK	2xTMTpro [K12; K13]; 1xTMTpro [N-Term]	87.1214	9	8.838e-06	32.3	41	54.7	61.6	45.7	59.1	44.3	48.5	37.8	32.4	54.4	44.7	46.1	47.7	45	55.2
High	A2AJL3	FGGY carbohydrate kinase domain-containing protein OS=Mus musculus OX=10090 GN=Fggy PE=1 SV=1	SPLADLTLK	1xTMTpro [K9]; 1xTMTpro [N-Term]	73.4333	12	0.00162																																	27.6	16.3	20.2	13.5	25.3	13.8	16.1	18.6	13.6	9.9
High	A2AJQ3	Probable C-mannosyltransferase DPY19L4 OS=Mus musculus OX=10090 GN=Dpy19l4 PE=2 SV=1	AKEEGTSVEPR	1xTMTpro [K2]; 1xTMTpro [N-Term]	29.8819	8	8.838e-06																																	147.5	178.8	201.8	251.2	281.2	318.5	369.3	467.7	426.4	424.9
High	A2AJT4	Arginine/serine-rich protein PNISR OS=Mus musculus OX=10090 GN=Pnisr PE=1 SV=1	ERPPSFR	1xTMTpro [N-Term]	29.8382	15	0.002714	96.8	86.6	113.1	139.7	148.6	143.5	136.4	158.7	122.3	144	132.4	135.5	126.9	146.1	141.3	133.3	78.8	100.8	101.2	123.3	143	140.7	192	166.7	160.2	136.9	121.3	132.4	138.8	134.7	142.4	142.7	98.9	99.2	104.1	102	124.4	118.5	125.2	156.1	136.7	130
High	A2AJT4	Arginine/serine-rich protein PNISR OS=Mus musculus OX=10090 GN=Pnisr PE=1 SV=1	FSSQDDR	1xTMTpro [N-Term]	25.8638	30	0.0007199	26	30.5	39.7	40.9	82.3	71	75.8	92.6	47.9	59.9	64.9	54.5	50.5	72.6	62.3	63.1	28	27.9	34.4	43.6	54.1	56.3	81.1	66.6	67.7	49.5	48	41.7	55	53.9	55.2	52.5	39.1	39	48.2	53	64.7	81	72.1	102.3	75.2	74.7
High	A2AJT4	Arginine/serine-rich protein PNISR OS=Mus musculus OX=10090 GN=Pnisr PE=1 SV=1	SGSISVK	1xTMTpro [K7]; 1xTMTpro [N-Term]	40.8656	26	0.0001794																																	35.2	33.9	49.5	54.2	68.5	66.7	80.5	105	85	79
High	A2AKB4	FERM and PDZ domain-containing protein 1 OS=Mus musculus OX=10090 GN=Frmpd1 PE=1 SV=1	VSSISAIR	1xTMTpro [N-Term]	47.679	16	0.001756																																	55.2	51.1	46.8	46.8	44.6	38.5	32.1	40.8	32.2	25.1
High	A2AKB4	FERM and PDZ domain-containing protein 1 OS=Mus musculus OX=10090 GN=Frmpd1 PE=1 SV=1	YGISQIINSK	1xTMTpro [K10]; 1xTMTpro [N-Term]	67.4185	14	0.0003676	15.4	18.4	15.5	18.6	15.2	21.7	12.7	14.7	12.8	18.4	24.3	27.6	16.1	29.6	17.4	18.7
High	A2AKG8	Focadhesin OS=Mus musculus OX=10090 GN=Focad PE=1 SV=1	AAIGFFITGGK	1xTMTpro [K11]; 1xTMTpro [N-Term]	84.5482	23	0.0001094	26.4	16.7	34	17.9	20.7	27.4	21.8	15	30	19.6	44	44	42.1	59.3	32.7	33.5																	20.1	12.4	21	13.3	14.6	12.5	19.7	15.3	23.9	14.7
High	A2AKG8	Focadhesin OS=Mus musculus OX=10090 GN=Focad PE=1 SV=1	AEDLGNR	1xTMTpro [N-Term]	25.3871	15	0.001306	103.8	121.5	121.1	140.3	134.1	151.3	103.6	133.5	138.9	148.7	461.1	492.2	530.2	639.5	227.2	241.7	78	88.5	85.2	80.4	80.8	114.9	86.3	100.6	118.8	107.5	241.6	301.6	282.6	325.8	140.9	154.9	119.1	140.3	118.4	110.8	135.9	124.5	132.2	142.8	168.7	167.1
High	A2AKG8	Focadhesin OS=Mus musculus OX=10090 GN=Focad PE=1 SV=1	AYHAILQGR	1xTMTpro [N-Term]	39.0768	49	3.33e-05	38.6	45.5	60.5	61.4	56.4	67.3	50.1	57.2	67.5	65.6	236.1	217.5	236.3	291.8	107.2	112.4	37.1	43.9	41.4	47.4	38.7	57.8	39.8	43.6	61.3	51.1	148.8	183.5	173.5	211.8	101.8	85.6	49.2	55.2	52.9	49.4	52.6	49.2	42.3	62.1	67.6	74.7
High	A2AKG8	Focadhesin OS=Mus musculus OX=10090 GN=Focad PE=1 SV=1	DMLTDEITK	1xTMTpro [K9]; 1xTMTpro [N-Term]	61.6112	29	0.0001094	60.9	77.9	70.6	105.1	70.3	90.8	61.5	65.6	67.8	62.3	169.3	166.1	168.1	237.1	107.2	102.5
High	A2AKG8	Focadhesin OS=Mus musculus OX=10090 GN=Focad PE=1 SV=1	EKVEEILNMLTAR	1xTMTpro [K2]; 1xTMTpro [N-Term]	96.1651	5	8.838e-06																	120.4	135.6	122.2	140.3	134.1	168.2	125.3	161.7	164.4	182.9	379	505.6	572.9	681.8	271.1	281.8
High	A2AKG8	Focadhesin OS=Mus musculus OX=10090 GN=Focad PE=1 SV=1	GIYHSALK	1xTMTpro [K8]; 1xTMTpro [N-Term]	41.1888	25	2.785e-05	99.6	108.1	140.9	151.7	137.1	156.9	121.2	154.6	165.7	166	501.8	476.8	525.7	635.6	260.4	251.4	104.5	137.1	120.3	150.6	117.9	159	137.9	176.5	167.8	166.3	427.6	502.1	477.4	566.8	260.7	248	165.6	147	154	150.2	155.2	144.6	150.8	174.4	219.2	226.1
High	A2AKG8	Focadhesin OS=Mus musculus OX=10090 GN=Focad PE=1 SV=1	IFDLLPNR	1xTMTpro [N-Term]	81.5982	21	0.001865																	6.1	9.2	3.8	4.2	5.3	6.3	4.9	6.4	7.8	5.9	22.5	27	20.3	28.2	10	10.7	8.9	10.1	8.3	9	9	7.3	8.8	8.1	13.2	16.1
High	A2AKG8	Focadhesin OS=Mus musculus OX=10090 GN=Focad PE=1 SV=1	LLTSLWEK	1xTMTpro [K8]; 1xTMTpro [N-Term]	87.7888	22	0.001412																	23.4	27.2	18.1	22.8	14.3	22.1	14.9	20.6	18.1	18	41.2	59.1	53.6	60.7	33.9	30.4	39.5	42.9	23.1	22.3	18.2	13.1	10.9	10.7	12.7	16.4
High	A2AKG8	Focadhesin OS=Mus musculus OX=10090 GN=Focad PE=1 SV=1	LRPSWIK	1xTMTpro [K7]; 1xTMTpro [N-Term]	56.8363	14	0.002581	100.3	111.5	123.5	147.3	145.9	155.2	114.2	141.7	152.3	153.1	428.6	451.9	500	651.4	262.9	250.9	65.3	75.4	76	81.3	67.7	98.2	79.9	93.3	111.7	103.4	205.3	269.3	257.8	302.4	153.3	146.5
High	A2AKG8	Focadhesin OS=Mus musculus OX=10090 GN=Focad PE=1 SV=1	LYLVSQGR	1xTMTpro [N-Term]	55.6296	16	0.0003676	37.2	50.1	54.2	57.6	50	61.2	44.5	52.1	59.7	66	201.7	200.9	213.6	261.5	108.2	109.3	50.2	61.1	57.6	65.4	61.9	74.4	52	64.4	76	77.7	198.9	254.3	238.7	298.4	132.8	129.7	45.8	60.9	55.3	54.2	61.9	58.5	54.2	61.4	93.4	104.5
High	A2AKG8	Focadhesin OS=Mus musculus OX=10090 GN=Focad PE=1 SV=1	SEAIQNTHFQAR	1xTMTpro [N-Term]	33.6875	74	8.838e-06	33.4	32.4	43.3	44.8	41.4	52	31.2	40.8	34.5	39.4	81.9	82.3	79.4	103	53.4	59.7	28.2	32.4	27.5	34.1	28.8	40.2	32.5	38.8	40	40.1	95.4	116.1	115.9	146.4	60.4	56.3	34.3	31.4	31.4	29.7	36.2	25.1	28.5	30.3	33.5	27.6
High	A2AKG8	Focadhesin OS=Mus musculus OX=10090 GN=Focad PE=1 SV=1	SMLLLLQK	1xTMTpro [K8]; 1xTMTpro [N-Term]	85.5493	38	6.035e-05	43.4	41.2	43.1	62.1	66.1	89.7	59.9	82.3	59.4	67.2	125.6	118.1	142.8	194.5	93.8	87.9	13.7	13.3	13.7	18.1	18.8	21.5	21	19.6	17.6	22.7	56.4	66.2	75	79.5	39.5	31	31.5	44.5	37.1	42.8	48.2	50.7	53.9	63	57.6	58.5
High	A2AKG8	Focadhesin OS=Mus musculus OX=10090 GN=Focad PE=1 SV=1	TVAGIPNFILK	1xTMTpro [K11]; 1xTMTpro [N-Term]	86.313	37	7.513e-05	42.1	49.1	56.7	69.9	56.8	61.8	51.2	58.8	63.3	62.2	148.4	141.8	166.6	218.7	100.5	99.2
High	A2AKG8	Focadhesin OS=Mus musculus OX=10090 GN=Focad PE=1 SV=1	VTVQEVLTQLPR	1xTMTpro [N-Term]	82.3381	77	8.838e-06	23.8	28.3	32.7	32.9	30.5	31.8	21	32.9	30	33.2	55.8	56.5	61.5	71.9	38.6	32.7	36.8	36.9	43.2	37.3	42.5	47	34.1	40.1	31.8	27.4	47.3	68.3	56.7	64	43.2	49.8	55.1	45.9	44.9	37.5	41	30.1	38.1	35.4	49.8	44.6
High	A2AKG8	Focadhesin OS=Mus musculus OX=10090 GN=Focad PE=1 SV=1	VYPELQR	1xTMTpro [N-Term]	45.9544	14	0.005656	35.6	42	43.3	51.5	44.6	48.4	47.2	56	60.3	60.2	136.6	133.8	140.7	168.5	78.4	78.1
High	A2AKQ0	UDP-glucuronic acid/UDP-N-acetylgalactosamine transporter OS=Mus musculus OX=10090 GN=Slc35d1 PE=2 SV=2	LNLPMFTVLR	1xTMTpro [N-Term]	95.9649	15	0.002301	15.1	22.9	29.5	34.4	32.5	38.2	26.6	41	47.2	64.2	39.8	40.4	14.4	14.6	31.4	34.2	23	27.5	27.4	33.7	31.5	40.4	34.5	44.6	47.1	51.4	28.9	30.2	19.2	17.7	29.8	34.5
High	A2AKQ0	UDP-glucuronic acid/UDP-N-acetylgalactosamine transporter OS=Mus musculus OX=10090 GN=Slc35d1 PE=2 SV=2	QSEASNK	1xTMTpro [K7]; 1xTMTpro [N-Term]	22.133	14	0.003263																	31.8	28.7	36	45.2	37.8	66.1	54.2	52.5	67.7	67.3	48.8	52.4	37.2	40.2	53.8	54
High	A2AKX3	Probable helicase senataxin OS=Mus musculus OX=10090 GN=Setx PE=1 SV=1	IFSSSSASR	1xTMTpro [N-Term]	42.0238	3	0.00214																	16.6	20.6	18	26.5	18.3	29.7	24.6	23.9	29.1	28.7	61.2	66.2	72.3	76.3	37.2	32.6	61.9	57.1	44.1	51.2	59.7	59	45.5	64.4	64.1	59.9
High	A2ALK8	Tyrosine-protein phosphatase non-receptor type 3 OS=Mus musculus OX=10090 GN=Ptpn3 PE=1 SV=1	EHIVAFNMLNYR	1xTMTpro [N-Term]	66.4155	40	8.838e-06	77.5	55.4	77.3	71.2	71	76.3	59	55	49.8	54.4	68.2	70.7	67.5	80.8	79.6	77.1	65.8	88.4	83.9	88.6	66.3	99.6	80.8	81.4	108.7	96.6	109.9	127.1	95.3	107.3	103.9	114.2
High	A2ALK8	Tyrosine-protein phosphatase non-receptor type 3 OS=Mus musculus OX=10090 GN=Ptpn3 PE=1 SV=1	FLDGLVQTFK	1xTMTpro [K10]; 1xTMTpro [N-Term]	95.8891	38	3.33e-05	8.2	14.7	12.8	15.6	13.4	19.4	14.8	14.4	11.8	12.2	25.1	24.3	35	29.5	17	17.9	32.2	32.5	43	39.4	45.9	45.7	50.1	47.4	50.5	40.9	85	86.9	106.4	95.4	59.2	65.5	45.1	40.7	40.2	41.7	48.1	39.2	49	54.5	51.5	50.4
High	A2ALK8	Tyrosine-protein phosphatase non-receptor type 3 OS=Mus musculus OX=10090 GN=Ptpn3 PE=1 SV=1	HLYFLQLK	1xTMTpro [K8]; 1xTMTpro [N-Term]	71.7744	31	3.33e-05	53.6	61.7	73.5	74.8	78.5	84.8	63.9	65.9	67.6	66.1	105.1	114.2	132.5	140.6	80.3	77.1																	96.4	91	92	104.8	102.3	74.6	95.7	99	89.1	97
High	A2ALK8	Tyrosine-protein phosphatase non-receptor type 3 OS=Mus musculus OX=10090 GN=Ptpn3 PE=1 SV=1	ITPDEEGR	1xTMTpro [N-Term]	29.5634	28	0.001533	74.5	66.6	93.2	103.1	102.3	105.8	102.4	113.3	109.3	112.1	207.7	189.6	249.8	262.6	134.7	140.3	46.4	43.4	57.1	50.1	62.1	68.4	71.9	66	73.6	59.5	102.7	108.2	131.7	126.3	79.7	79.1	102.2	80.2	80.3	93.2	107.2	101.3	82.5	95.8	103.9	100.3
High	A2ALK8	Tyrosine-protein phosphatase non-receptor type 3 OS=Mus musculus OX=10090 GN=Ptpn3 PE=1 SV=1	NLPVYPLDIVR	1xTMTpro [N-Term]	82.529	15	0.002237	120.4	118.5	141.7	171.7	165.2	164.7	138.7	158.1	166.2	189.3	240.2	240	234.7	301.9	183.5	184.2
High	A2ALK8	Tyrosine-protein phosphatase non-receptor type 3 OS=Mus musculus OX=10090 GN=Ptpn3 PE=1 SV=1	YKDVLPYDTTR	1xTMTpro [K2]; 1xTMTpro [N-Term]	53.6352	7	0.0004289																	171	163.2	198.8	180.5	221.5	235.6	251.3	228.6	268.6	210.4	359.4	375.9	424.9	394.2	283.4	284.9
High	A2ALS5	Rap1 GTPase-activating protein 1 OS=Mus musculus OX=10090 GN=Rap1gap PE=1 SV=2	AAGISLIVPGKSPTR	1xTMTpro [K11]; 1xTMTpro [N-Term]	64.7166	31	8.838e-06	164.8	247.7	326.3	362.9	253.5	408.5	248.8	240.6	213.8	170.4	141.1	203.6	139.6	228.5	216.6	211.5																	262.1	367.9	238.5	186.9	246.2	216.3	264	286.9	230.7	239.3
High	A2ALS5	Rap1 GTPase-activating protein 1 OS=Mus musculus OX=10090 GN=Rap1gap PE=1 SV=2	DDVPFFGPPLPDPAVFR	1xTMTpro [N-Term]	97.5689	48	8.838e-06																	100.9	126.3	101.9	124.6	98.5	120.7	110.6	116.2	98.2	98.4	107	139.8	100.8	122.4	109	121.5
High	A2ALS5	Rap1 GTPase-activating protein 1 OS=Mus musculus OX=10090 GN=Rap1gap PE=1 SV=2	DSFLYSTWLDDSVSTTSGGSSPGLTR	1xTMTpro [N-Term]	84.7529	103	8.838e-06	25.6	32.2	33.3	39.5	30.9	38.2	26.3	29.3	30.6	22.3	26.2	27.5	21.3	23.7	27.9	26.4	61.4	94.6	50.6	63	47.2	60.8	49	61.1	48.7	44.7	33.4	45.5	39.6	44	54.9	53.1	44.6	51.6	41.9	48.8	51.2	44.6	38.2	51.1	39	37.5
High	A2ALS5	Rap1 GTPase-activating protein 1 OS=Mus musculus OX=10090 GN=Rap1gap PE=1 SV=2	ESPPAGQK	1xTMTpro [K8]; 1xTMTpro [N-Term]	29.5756	26	0.00149	91.2	94.4	126	131.2	140.7	145.5	122.8	142.5	92.5	98.4	72.3	71.1	72.2	98	109.5	112.1																	248.6	210.9	254.5	246.8	303.2	269.5	410.3	340.2	482.5	216.7
High	A2ALS5	Rap1 GTPase-activating protein 1 OS=Mus musculus OX=10090 GN=Rap1gap PE=1 SV=2	FGVIYQK	1xTMTpro [K7]; 1xTMTpro [N-Term]	63.178	22	0.001387	241.1	252.4	282.4	316.9	332.2	360.5	259.4	307.2	185.1	203.7	142.9	134.2	144.9	189.7	263.9	264	179.9	287.8	199.9	317.7	199.4	350.5	260.4	327.7	171.9	178.8	97.8	141	121.2	172.3	187	187.4	189.7	187.7	174.3	194.3	236.3	182.8	196.4	231.5	155.7	161.4
High	A2ALS5	Rap1 GTPase-activating protein 1 OS=Mus musculus OX=10090 GN=Rap1gap PE=1 SV=2	FYPVLYPK	1xTMTpro [K8]; 1xTMTpro [N-Term]	76.9905	22	0.0008575	169.3	165.8	195.2	194.3	220.5	238.7	172.3	205.7	126.1	145.9	93.5	98.2	106.9	136.6	174.4	177	200.8	264.2	211.3	288.5	263.6	315	267.3	295	180.5	187.8	101.7	129.9	136.3	155.6	212.5	210.9	433.3	365.4	387.4	403.6	465.9	378.9	309.4	447.4	296	310
High	A2ALS5	Rap1 GTPase-activating protein 1 OS=Mus musculus OX=10090 GN=Rap1gap PE=1 SV=2	GGLDVTHGQTGTESVYCNFR	1xCarbamidomethyl [C17]; 1xTMTpro [N-Term]	51.152	77	8.838e-06																	143.2	174.5	158.4	204.4	149.6	207.9	150.7	202.6	133.6	121.2	70.3	90.8	87.5	125.7	136.5	133.4
High	A2ALS5	Rap1 GTPase-activating protein 1 OS=Mus musculus OX=10090 GN=Rap1gap PE=1 SV=2	KGPEFQEFLLTK	2xTMTpro [K1; K12]; 1xTMTpro [N-Term]	73.9345	21	8.838e-06	555	612.9	717.7	800.4	818	910.7	634.7	807.6	467.3	490.2	355.1	345.2	349.3	488	609.1	634.3																	513.6	464.2	450.1	448.8	535.3	470	458	569.3	376.5	388.5
High	A2ALS5	Rap1 GTPase-activating protein 1 OS=Mus musculus OX=10090 GN=Rap1gap PE=1 SV=2	LECNPTAR	1xCarbamidomethyl [C3]; 1xTMTpro [N-Term]	31.7651	15	0.001119																	425.3	594.5	440.3	630.8	510.1	653.1	535.8	632.6	419.6	417.3	288.9	364.6	363	443.6	441.2	451.3	267.3	257.6	256.2	276.5	273	265.2	216.6	271.8	219.8	228.7
High	A2ALS5	Rap1 GTPase-activating protein 1 OS=Mus musculus OX=10090 GN=Rap1gap PE=1 SV=2	LINAEYACYK	1xCarbamidomethyl [C8]; 1xTMTpro [K10]; 1xTMTpro [N-Term]	61.6638	55	8.838e-06	327.4	328.6	270.6	323.2	255.7	281	184.5	252.6	142.2	171.9	120.2	125.5	116.8	151	244.3	241.3	162.3	238	195	261	220.7	290.9	261	261.6	182.1	188.2	135.1	150.1	158.1	185.6	215.1	207.8	213.6	246.1	209.7	221.8	239.1	209.1	233.1	265.8	252.8	260.7
High	A2ALS5	Rap1 GTPase-activating protein 1 OS=Mus musculus OX=10090 GN=Rap1gap PE=1 SV=2	LINAEYACYKAEK	1xCarbamidomethyl [C8]; 2xTMTpro [K10; K13]; 1xTMTpro [N-Term]	59.83	34	8.838e-06	226.5	289.2	392.2	454.5	347.4	447.1	332.8	299.1	256.4	206.9	154.1	202.3	146.1	225.5	256.4	248.6	220.3	249.3	234.9	228.2	137.4	279.3	203.8	270	219	134.8	121.9	147.3	129.9	161.1	196.7	216.3
High	A2ALS5	Rap1 GTPase-activating protein 1 OS=Mus musculus OX=10090 GN=Rap1gap PE=1 SV=2	LIVTFDEHVISNNFK	1xTMTpro [K15]; 1xTMTpro [N-Term]	81.9972	64	8.838e-06	71.5	81.5	92.7	115.2	101.4	120.8	100	110.4	77.3	86.8	74.5	77.7	78.4	111.1	86.3	89.3	311	376.4	310.4	421.4	291.5	419.3	349.5	403.9	254.6	233.9	151.3	160.9	177.5	211.1	308.5	280.1	374.1	374.9	286.7	312.1	282.2	262.9	264.9	266.3	224.5	192.5
High	A2ALS5	Rap1 GTPase-activating protein 1 OS=Mus musculus OX=10090 GN=Rap1gap PE=1 SV=2	LPYTEGDAQQLQR	1xTMTpro [N-Term]	50.1767	49	8.838e-06	118.3	126.2	138.3	154.5	156	183.8	139.3	166.9	103.9	116.5	90.7	93.7	83.9	109.1	137	139.9	111.4	129	108.2	141.5	117.2	144.8	132.3	132.8	97.7	93.9	71.1	80.3	75.1	82.5	112.1	111	364.5	322.6	322.2	332.5	338.3	297.1	297.7	333	275.4	282.6
High	A2ALS5	Rap1 GTPase-activating protein 1 OS=Mus musculus OX=10090 GN=Rap1gap PE=1 SV=2	LVCEDVNVDR	1xCarbamidomethyl [C3]; 1xTMTpro [N-Term]	46.1532	27	8.838e-06	160.9	189.2	211.8	227.9	226.6	246.5	176.1	235.1	142	162.5	174.2	162.2	190	237.5	198.9	217.4	187.3	260	172.3	264.4	212.3	284.2	211	249.4	159.9	163.1	96.9	123.8	128.7	166.1	193.7	201.1
High	A2ALS5	Rap1 GTPase-activating protein 1 OS=Mus musculus OX=10090 GN=Rap1gap PE=1 SV=2	NRVESAAQR	1xTMTpro [N-Term]	17.3646	28	3.865e-05	126.3	145	154	227.9	222.3	259.7	181.4	226.6	120.7	110.1	72.3	69.6	62.1	116.1	140.9	129.9	246	272.6	259.6	368.4	280.2	438.1	362.6	431.5	243.9	189.6	117.8	120	158.8	210.3	232.3	223.1	354.7	321	330.2	324.3	362	343.9	367.1	501.4	270.9	255.9
High	A2ALS5	Rap1 GTPase-activating protein 1 OS=Mus musculus OX=10090 GN=Rap1gap PE=1 SV=2	NRVESAAQR	1xDeamidated [N1]; 1xTMTpro [N-Term]	18.8496	23	0.0001094	39.2	37.4	41.3	35.7	45.4	37.3	34.8	35.5	18.9	26.2	17.1	12.8	17.8	16.8	36	34	16	18.6	16.6	19.3	17.8	18.9	16.9	16.7	10.2	12	7	7.5	5.8	7.3	12.9	16.1	55.4	44.7	59.1	64	49.3	55.9	43.3	48.7	37.1	37.2
High	A2ALS5	Rap1 GTPase-activating protein 1 OS=Mus musculus OX=10090 GN=Rap1gap PE=1 SV=2	SGDPACPEIK	1xCarbamidomethyl [C6]; 1xTMTpro [K10]; 1xTMTpro [N-Term]	42.9168	23	0.001147																	179.3	234.5	197.6	268.7	258.1	310	309.9	336.2	277.3	232.4	311.3	365.9	362	422.2	290.6	329.2
High	A2ALS5	Rap1 GTPase-activating protein 1 OS=Mus musculus OX=10090 GN=Rap1gap PE=1 SV=2	SGPFGSR	1xTMTpro [N-Term]	32.3477	9	0.003893																	53.2	71.3	58	79.5	58.6	88.3	68.9	90	49.9	47	34	38.2	41.8	42.5	51.2	54.5
High	A2ALS5	Rap1 GTPase-activating protein 1 OS=Mus musculus OX=10090 GN=Rap1gap PE=1 SV=2	SPHPDVGK	1xTMTpro [K8]; 1xTMTpro [N-Term]	30.6718	26	0.001586	62.4	66.9	88.7	97.6	111.5	109.4	92.5	120.6	102.1	110.5	152	148.8	147.1	179.1	122	126.3
High	A2ALS5	Rap1 GTPase-activating protein 1 OS=Mus musculus OX=10090 GN=Rap1gap PE=1 SV=2	SQSMDAMGLSNK	1xTMTpro [K12]; 1xTMTpro [N-Term]	51.1749	32	2.218e-05																																	268	284.2	270.3	290.3	332.8	329.4	314.3	386.3	311.5	314.7
High	A2ALS5	Rap1 GTPase-activating protein 1 OS=Mus musculus OX=10090 GN=Rap1gap PE=1 SV=2	SSAIGIENIQEVQEK	1xTMTpro [K15]; 1xTMTpro [N-Term]	61.2373	52	8.838e-06																	164	197.2	166	263.3	211.8	287.6	238.2	262.4	229	200	163.9	203.1	146.9	184.5	213.6	221.3
High	A2ALS5	Rap1 GTPase-activating protein 1 OS=Mus musculus OX=10090 GN=Rap1gap PE=1 SV=2	SSAIGIENIQEVQEKR	1xTMTpro [K15]; 1xTMTpro [N-Term]	55.6135	63	8.838e-06																	320.9	407.2	426.5	411.9	392.2	573.9	530.5	583.4	357.9	315.9	236.9	304.6	262.8	311.1	381.6	392.8
High	A2ALS5	Rap1 GTPase-activating protein 1 OS=Mus musculus OX=10090 GN=Rap1gap PE=1 SV=2	TEVLQGFSR	1xTMTpro [N-Term]	53.9764	27	3.865e-05	35.3	46	43.8	77.6	46.4	68.4	42.1	58	39.8	42.3	31.4	28.6	26.3	42.9	44	44.4	238.7	317.1	250.8	369.6	261.9	385	302.4	362.7	227.4	215.1	169.3	198.5	219.5	251.2	221.3	250.5	371.8	359.1	327.9	357.1	372	331.5	303.2	402.7	312.9	288.6
High	A2ALS5	Rap1 GTPase-activating protein 1 OS=Mus musculus OX=10090 GN=Rap1gap PE=1 SV=2	THHDVIPISCLTEFPNVVQMAK	1xCarbamidomethyl [C10]; 1xTMTpro [K22]; 1xTMTpro [N-Term]	84.1001	49	8.838e-06	133.7	140.4	172.6	230.9	172.2	185.3	149.3	157.4	132.7	136.8	124.2	120.8	121.6	142.9	143.7	158.6
High	A2ALS5	Rap1 GTPase-activating protein 1 OS=Mus musculus OX=10090 GN=Rap1gap PE=1 SV=2	VESAAQR	1xTMTpro [N-Term]	21.6105	13	0.0007854	103.1	91.5	107.8	111.3	108.4	105.3	104.2	129.3	69.4	87.9	66.2	54	67.2	66.6	101	110.4	584.9	836.7	499.6	886.2	682.5	886.8	672	738.3	506.8	456.3	299.3	332.4	385.8	467.2	508.8	531.1	119.1	83.2	109.2	125.1	115.9	116	80	117.2	80.9	89.3
High	A2ALS5	Rap1 GTPase-activating protein 1 OS=Mus musculus OX=10090 GN=Rap1gap PE=1 SV=2	VKLECNPTAR	1xCarbamidomethyl [C5]; 1xTMTpro [K2]; 1xTMTpro [N-Term]	40.5125	4	6.035e-05	331	352.3	427.6	466.5	493.3	586.1	423.8	506.8	259.9	297.1	192.5	192.7	184.6	261.6	369.5	381	444.3	575.5	517.2	658.7	564.3	811.8	706.8	819.8	491.4	434.6	274.9	342.1	367.1	426.2	499.8	556.3	915.7	900.6	854.9	916.9	1002.3	992	919.5	1250.6	702.8	805.9
High	A2ALS5	Rap1 GTPase-activating protein 1 OS=Mus musculus OX=10090 GN=Rap1gap PE=1 SV=2	VSVTARDDVPFFGPPLPDPAVFR	1xTMTpro [N-Term]	92.5155	47	8.838e-06	36.9	45.6	65.7	69.1	64.3	69.1	60.7	57.7	49.4	36.4	26.5	33.8	22.6	32.4	46.8	51.1	29.3	37.7	35.9	39.1	26.2	50.3	50.1	48.7	37.1	22.3	18.8	19.9	26.7	26.3	30.8	34.9	108.3	138.8	118.2	103.5	112	117.3	137.9	157.8	97.1	106.5
High	A2ALS5	Rap1 GTPase-activating protein 1 OS=Mus musculus OX=10090 GN=Rap1gap PE=1 SV=2	YDVIGDQEHLR	1xTMTpro [N-Term]	42.1829	85	8.838e-06	42.2	47.4	58.2	56.4	49.4	56.5	41.1	51.4	44.1	55.7	42.5	49.5	38.6	52.5	47.5	50.7																	73	75.9	67	63.7	70.2	64.1	72.2	76.6	56.8	53.4
High	A2ALU4	Protein Shroom2 OS=Mus musculus OX=10090 GN=Shroom2 PE=1 SV=1	CLFDSLQPER	1xCarbamidomethyl [C1]; 1xTMTpro [N-Term]	63.2585	25	7.513e-05	239	259.4	322.6	368.6	306	378.4	287.1	302.3	234.4	251	208.8	223.9	193.7	220.8	276.7	271.2																	257.3	275	239.1	264.8	267.8	251.7	261.4	314.2	251.9	217.3
High	A2ALU4	Protein Shroom2 OS=Mus musculus OX=10090 GN=Shroom2 PE=1 SV=1	DEYLLEEAQQR	1xTMTpro [N-Term]	52.9417	27	8.838e-06	92.6	106.5	124.5	136.6	109	127	102.5	114.4	85.8	96.5	84.1	96.9	81.3	106.4	119.2	116.5	128.3	159	162.6	165.3	156	224.9	200.2	223.4	213.9	139.1	74.5	79.3	64.3	73.9	170.1	161	122.3	110.9	109.5	123.8	109.4	115.5	93.8	120.3	86.5	102.3
High	A2ALU4	Protein Shroom2 OS=Mus musculus OX=10090 GN=Shroom2 PE=1 SV=1	ELEDKIHLGEEQLK	2xTMTpro [K5; K14]; 1xTMTpro [N-Term]	64.5118	23	8.838e-06																	109.4	178.4	146.4	176	155.8	199	179.9	212.7	108.7	106.6	54.6	69.6	61.7	70.4	130.6	136.6
High	A2ALU4	Protein Shroom2 OS=Mus musculus OX=10090 GN=Shroom2 PE=1 SV=1	ESLLEDIQANNALGDEVEAIVK	1xTMTpro [K22]; 1xTMTpro [N-Term]	97.6259	59	8.838e-06																																	156.4	176.6	147	162.5	171.7	141.6	159	199.8	160.8	171.1
High	A2ALU4	Protein Shroom2 OS=Mus musculus OX=10090 GN=Shroom2 PE=1 SV=1	IKTTMDLMEGIFPK	2xTMTpro [K2; K14]; 1xTMTpro [N-Term]	94.5283	15	0.0003339	11.5	8.8	15.8	14.8	17.4	17.6	12.2	17.6	8.9	9.9	8.1	12.3	7.2	15.1	15.5	17.7
High	A2ALU4	Protein Shroom2 OS=Mus musculus OX=10090 GN=Shroom2 PE=1 SV=1	KQELIDSISR	1xTMTpro [K1]; 1xTMTpro [N-Term]	54.9771	8	0.001081																																	310.4	305.4	307.9	332.4	322.1	307.9	281.4	397.8	255.6	292
High	A2ALU4	Protein Shroom2 OS=Mus musculus OX=10090 GN=Shroom2 PE=1 SV=1	MFIGDLDK	1xTMTpro [K8]; 1xTMTpro [N-Term]	72.9859	27	0.0001612																																	221.7	223.4	227.7	238.5	257.4	253.9	207.6	263.9	191.9	206.1
High	A2ALU4	Protein Shroom2 OS=Mus musculus OX=10090 GN=Shroom2 PE=1 SV=1	QEVEAPHR	1xTMTpro [N-Term]	22.1289	50	2.785e-05	64.3	76.4	90.8	109	86.8	100.2	71.3	88.9	57.2	62.9	44.9	41.7	40.6	52.7	75.8	84.9																	96.5	80.2	68.8	75.5	61	56.8	50.9	63.4	52.3	46
High	A2ALU4	Protein Shroom2 OS=Mus musculus OX=10090 GN=Shroom2 PE=1 SV=1	SALIIEQR	1xTMTpro [N-Term]	48.3968	32	6.035e-05	259.3	286	289.9	346.2	358.4	374.6	278.9	356.4	179.1	222.4	130.4	117.2	118.6	157.6	261.1	279	329.6	479.9	357.7	505.2	367	523.4	451.9	518.1	310.4	272.3	153	176.3	172.6	200.8	330.7	340.9	507.5	457.1	455.4	491.7	513.3	485.7	447	624.3	360.9	391.5
High	A2ALU4	Protein Shroom2 OS=Mus musculus OX=10090 GN=Shroom2 PE=1 SV=1	SLADILDPSVK	1xTMTpro [K11]; 1xTMTpro [N-Term]	80.6107	40	2.785e-05	151.1	172.1	207.7	232.7	222.9	237.6	187.1	235.3	110	151.2	93.8	112.4	89.8	118.5	181	172.4
High	A2ALU4	Protein Shroom2 OS=Mus musculus OX=10090 GN=Shroom2 PE=1 SV=1	TMDDLKSEELAR	1xTMTpro [K6]; 1xTMTpro [N-Term]	51.6744	1	6.573e-05	174.8	195.5	239.8	286.4	264.7	312.2	221.3	298.5	143.4	192.8	164.3	164.4	168.4	210.7	231	242.9																	446.1	444.2	408.4	440.4	478.1	457.5	409.5	582.2	349.6	398.9
High	A2ALU4	Protein Shroom2 OS=Mus musculus OX=10090 GN=Shroom2 PE=1 SV=1	TTMDLMEGIFPK	1xTMTpro [K12]; 1xTMTpro [N-Term]	89.3003	46	8.838e-06	145.1	138.7	144.7	190.5	168.7	203.4	154.5	217	94.8	149.1	74.5	69.6	78.6	93.6	157.8	160.2	77.5	113.8	71.3	135.4	104.7	130.3	97	118.7	68.1	76.1	40.7	41.6	38.5	48.7	82.2	84.9	107	84.1	90.5	119.9	120.6	135	76.5	161.1	81.3	84.5
High	A2ALU4	Protein Shroom2 OS=Mus musculus OX=10090 GN=Shroom2 PE=1 SV=1	VMDNNTTVK	1xTMTpro [K9]; 1xTMTpro [N-Term]	43.8307	47	8.838e-06	76.3	82.1	103.2	125.1	105.9	135	91.5	109.7	72.1	90.1	56.5	64.8	54.3	72.5	88.8	97.8	120.7	181.1	162.6	187.7	148.3	226.4	187.5	230.1	121	112.7	65.2	72.3	70	79.1	137.1	154.3	249.9	260.4	241.2	263.4	260.5	261.3	241.3	329	200	222.5
High	A2AMZ4	NADH dehydrogenase [ubiquinone] 1 alpha subcomplex assembly factor 8 OS=Mus musculus OX=10090 GN=Ndufaf8 PE=1 SV=1	AFPEHLAACGAEASAYGK	1xCarbamidomethyl [C9]; 1xTMTpro [K18]; 1xTMTpro [N-Term]	56.5425	36	8.838e-06																	40.6	85.6	25.1	39.2	11.7	14.6	7.8	6.6	4.1	6.3	5.8	3.1	6.1	6.1	19.5	17.8
High	A2AN08	E3 ubiquitin-protein ligase UBR4 OS=Mus musculus OX=10090 GN=Ubr4 PE=1 SV=1	ACAEIAAQR	1xCarbamidomethyl [C2]; 1xTMTpro [N-Term]	29.7218	25	6.573e-05	202	222.4	239.2	298.1	224.8	274.9	190.2	217.5	184.9	191.7	454.1	438.9	950.4	1192.4	337.9	378.5	297	355.7	326.4	359.6	308.5	378.1	308.3	336.2	273.8	265.9	506.3	579.1	1195.1	1233.7	518.3	547.2	279.4	255.5	249.9	229.9	243.4	200.9	186	219.9	209.9	195
High	A2AN08	E3 ubiquitin-protein ligase UBR4 OS=Mus musculus OX=10090 GN=Ubr4 PE=1 SV=1	ACAEIAAQR	1xCarbamidomethyl [C2]; 1xDeamidated [Q8]; 1xTMTpro [N-Term]	31.3114	27	0.001566	15.2	19.7	22.2	26.5	18.7	21.5	17.9	22.2	15.5	16.2	41.3	43.5	88.1	112.5	34.9	36.1
High	A2AN08	E3 ubiquitin-protein ligase UBR4 OS=Mus musculus OX=10090 GN=Ubr4 PE=1 SV=1	AFMAVCIETAK	1xCarbamidomethyl [C6]; 1xTMTpro [K11]; 1xTMTpro [N-Term]	70.6591	34	2.218e-05																	54.5	64	57.4	59.7	58.5	74.9	65.4	57.3	65	56.8	68.8	88.9	113.6	136.3	70.1	81
High	A2AN08	E3 ubiquitin-protein ligase UBR4 OS=Mus musculus OX=10090 GN=Ubr4 PE=1 SV=1	ALATNPALR	1xTMTpro [N-Term]	43.9889	45	9.049e-05	93.1	102.2	127.1	142.4	127.8	149.9	122.6	128.5	122.5	120.3	136.9	157.3	208.9	280.1	128.7	150																	99.5	99.9	91.1	86.5	89.8	78.1	86.5	91.4	91.5	89.2
High	A2AN08	E3 ubiquitin-protein ligase UBR4 OS=Mus musculus OX=10090 GN=Ubr4 PE=1 SV=1	ALGTLGMTTNEK	1xTMTpro [K12]; 1xTMTpro [N-Term]	60.0569	48	2.218e-05																																	139.3	120.4	123.6	141.8	131.6	127.4	121.9	149.4	146.3	128.2
High	A2AN08	E3 ubiquitin-protein ligase UBR4 OS=Mus musculus OX=10090 GN=Ubr4 PE=1 SV=1	ANTPLYHGFKEVEENWSK	2xTMTpro [K10; K18]; 1xTMTpro [N-Term]	69.2686	24	8.838e-06																																	69.1	78.4	73.8	69.2	65.3	63.1	70.1	69.1	61.1	62.9
High	A2AN08	E3 ubiquitin-protein ligase UBR4 OS=Mus musculus OX=10090 GN=Ubr4 PE=1 SV=1	APSYIEIFGR	1xTMTpro [N-Term]	73.4279	25	7.513e-05	46.6	46.2	55.4	54.6	53.3	63.2	37.7	55.2	37.4	37.1	105.9	110.5	244.6	299.5	87.6	97.2	17	18	15.7	17	16.4	18.3	13.6	15.1	14.3	13	31.4	25.7	64.9	70.4	28.1	23.3	87.6	79.6	72.7	78.3	75.3	56.7	66.5	66.6	60.6	62.6
High	A2AN08	E3 ubiquitin-protein ligase UBR4 OS=Mus musculus OX=10090 GN=Ubr4 PE=1 SV=1	ASYEAWK	1xTMTpro [K7]; 1xTMTpro [N-Term]	52.0401	16	0.001245																																	406	371.7	312.7	318.2	324.8	284.4	265.4	318.3	274.9	269.2
High	A2AN08	E3 ubiquitin-protein ligase UBR4 OS=Mus musculus OX=10090 GN=Ubr4 PE=1 SV=1	AVAPGGATR	1xTMTpro [N-Term]	25.2732	22	3.865e-05																	340	376.5	346.6	390	321	421.6	345.4	397.8	294.6	279.7	520.7	550.3	1177.9	1304	535.6	522.6	283.4	258	230	209.9	263.4	189	235.7	233.7	209.7	193.5
High	A2AN08	E3 ubiquitin-protein ligase UBR4 OS=Mus musculus OX=10090 GN=Ubr4 PE=1 SV=1	AVQCLNTSSK	1xCarbamidomethyl [C4]; 1xTMTpro [K10]; 1xTMTpro [N-Term]	42.0128	42	2.218e-05	109.3	107.5	122.7	133.9	122.9	136.6	97.1	124.3	86.6	105.6	166.5	176.7	353.8	433.6	159.8	169.1	94.7	106.9	84.3	96.1	84.1	92.4	78.9	87.6	75.4	64.4	85.6	102.3	221	266.2	126.7	125
High	A2AN08	E3 ubiquitin-protein ligase UBR4 OS=Mus musculus OX=10090 GN=Ubr4 PE=1 SV=1	AVSNINTLLDK	1xTMTpro [K11]; 1xTMTpro [N-Term]	70.2773	47	3.865e-05	121	129.7	137.4	177.2	135	162.8	99.2	121.8	71.6	92	115.3	109.6	202.9	264.7	133.4	143.4	47.4	59.6	55.3	50.6	44.7	59.1	42.7	58.4	42.2	39.3	44.5	53	80.1	91.7	58.4	53.3	125.4	118	118.1	115.9	104.7	88.6	79.4	94.1	84.1	96.1
High	A2AN08	E3 ubiquitin-protein ligase UBR4 OS=Mus musculus OX=10090 GN=Ubr4 PE=1 SV=1	AVSNINTLLDKADR	1xTMTpro [K11]; 1xTMTpro [N-Term]	64.5305	14	8.838e-06	123.9	137.2	177.9	211.7	163.2	193.5	141.3	163.9	136.5	120.1	237.2	262	378.9	525.3	214.5	221.4
High	A2AN08	E3 ubiquitin-protein ligase UBR4 OS=Mus musculus OX=10090 GN=Ubr4 PE=1 SV=1	CFLLESNSSSVR	1xCarbamidomethyl [C1]; 1xTMTpro [N-Term]	58.0239	40	8.838e-06																																	175.2	179.2	151.6	166.7	169.3	150.2	148.9	175.3	153.8	138.4
High	A2AN08	E3 ubiquitin-protein ligase UBR4 OS=Mus musculus OX=10090 GN=Ubr4 PE=1 SV=1	CLEIYDMIGQAISSSR	1xCarbamidomethyl [C1]; 1xTMTpro [N-Term]	95.0681	69	8.838e-06	75.5	81.9	90.6	109.6	82.3	98.5	77	78.7	78.5	71.8	88	75.3	112.2	118.4	86.8	93.6																	83.6	74.6	74	80.1	83.4	65.9	80.6	68.1	85.8	75.9
High	A2AN08	E3 ubiquitin-protein ligase UBR4 OS=Mus musculus OX=10090 GN=Ubr4 PE=1 SV=1	CNGLLPVWGPHVPESAFATCLAR	2xCarbamidomethyl [C1; C20]; 1xTMTpro [N-Term]	83.65	58	8.838e-06																																	16.6	16.8	17.3	19.1	17.1	18.5	12	14.1	17.7	12.2
High	A2AN08	E3 ubiquitin-protein ligase UBR4 OS=Mus musculus OX=10090 GN=Ubr4 PE=1 SV=1	CNGLLPVWGPHVPESAFATCLAR	2xCarbamidomethyl [C1; C20]; 1xDeamidated [N2]; 1xTMTpro [N-Term]	87.1162	70	8.838e-06	10.9	12.3	14.7	20.7	13.2	18.9	11.4	16.8	13.3	12	15.6	15.3	44	60	20.9	23.1	15.5	13.5	15.8	16.3	12.4	18.3	11.8	18.3	10.8	11.2	16.2	16.8	33.2	40.5	21.4	14.2	13.9	8.6	12.9	14.8	12.2	10.8	10.9	11.1	11.6	7.6
High	A2AN08	E3 ubiquitin-protein ligase UBR4 OS=Mus musculus OX=10090 GN=Ubr4 PE=1 SV=1	DLDPEVFQR	1xTMTpro [N-Term]	55.0298	15	0.003418																	164.7	214.3	164.1	201.1	150.9	194.6	141.8	170.4	144.9	153.4	202.6	229.6	364.7	425.3	222.2	215.6	254.1	359	192.1	187.6	153.5	154.5	156.6	181.3	201.3	199.5
High	A2AN08	E3 ubiquitin-protein ligase UBR4 OS=Mus musculus OX=10090 GN=Ubr4 PE=1 SV=1	EEALQADR	1xTMTpro [N-Term]	29.2939	26	6.035e-05	62.2	61.1	73.4	71.2	67.4	69.7	54.4	70.5	48.9	57.2	150.6	142.5	358.3	433.8	118.3	123.4	16.5	18.8	19.4	14.9	18.9	20.1	15.3	14.7	13.1	15.7	28.4	35.7	77.4	74.2	31.8	29.8
High	A2AN08	E3 ubiquitin-protein ligase UBR4 OS=Mus musculus OX=10090 GN=Ubr4 PE=1 SV=1	EEALQADRK	1xTMTpro [K9]; 1xTMTpro [N-Term]	34.0553	4	0.002214																	93.1	126.7	94.5	116.7	95.1	128.7	102.5	125.6	91.7	101.1	143	161.8	331.7	363.4	158.1	189.1
High	A2AN08	E3 ubiquitin-protein ligase UBR4 OS=Mus musculus OX=10090 GN=Ubr4 PE=1 SV=1	EFMNQHWYHCHTCK	2xCarbamidomethyl [C10; C13]; 1xTMTpro [K14]; 1xTMTpro [N-Term]	44.3417	18	7.513e-05	66	74.5	84.9	103.2	88.2	117.1	79.9	98.9	71.8	77.3	172.1	171.2	367.8	490.8	153.5	148.6	68.3	84.3	65.1	96.7	70.4	100	73.6	100.4	70.7	70.5	128.1	146	236.9	360.5	142	146.6	69.8	70.4	60.9	67	64.8	55.8	62.1	76.2	78.5	71.7
High	A2AN08	E3 ubiquitin-protein ligase UBR4 OS=Mus musculus OX=10090 GN=Ubr4 PE=1 SV=1	EGVGSPK	1xTMTpro [K7]; 1xTMTpro [N-Term]	32.7316	8	0.002825																																	677.7	682.3	680.2	918.5	822.5	991.2	680.8	1055.5	901.4	852.4
High	A2AN08	E3 ubiquitin-protein ligase UBR4 OS=Mus musculus OX=10090 GN=Ubr4 PE=1 SV=1	EHPDVNK	1xTMTpro [K7]; 1xTMTpro [N-Term]	28.9411	20	0.001005	122.5	119.4	90	136.1	85	95.8	53.7	75.5	57	73.4	124.2	125.9	233.7	289.8	148.9	128.2																	402.5	369.1	206	213.7	162.8	140.1	111.5	120.5	115	109.9
High	A2AN08	E3 ubiquitin-protein ligase UBR4 OS=Mus musculus OX=10090 GN=Ubr4 PE=1 SV=1	EHPDVNKK	2xTMTpro [K7; K8]; 1xTMTpro [N-Term]	30.214	4	0.002584																																	323.3	334.2	263.4	286.9	311.9	272.4	252.7	295.3	244.1	224.8
High	A2AN08	E3 ubiquitin-protein ligase UBR4 OS=Mus musculus OX=10090 GN=Ubr4 PE=1 SV=1	ELFDYNLR	1xTMTpro [N-Term]	65.4796	27	0.0006133	232.1	263.2	273.4	326.8	281.5	300.9	219	264.7	227.7	244.5	328.9	355.2	676.1	835	347.2	353.1	280.6	338.9	300.7	345.7	282.9	369.9	254.4	327.1	236.2	249.6	388.3	456.6	877.9	965.3	442.4	444.3	237.7	239	216.6	225.4	220.3	195	176	181.3	175.6	177.9
High	A2AN08	E3 ubiquitin-protein ligase UBR4 OS=Mus musculus OX=10090 GN=Ubr4 PE=1 SV=1	ELFDYNLRR	1xTMTpro [N-Term]	55.8725	6	3.865e-05	121.7	128.3	173.4	201.4	169.9	205.2	182.2	186.2	179.1	174.8	215.6	262.6	332.1	442.3	199.9	234.5	124.5	127.5	163.5	149.7	147	195.8	176	181.9	204.2	164	247.2	247.1	380.2	441.9	222.5	206.1
High	A2AN08	E3 ubiquitin-protein ligase UBR4 OS=Mus musculus OX=10090 GN=Ubr4 PE=1 SV=1	ELLEYDLQQR	1xTMTpro [N-Term]	60.393	46	0.0001194	51.3	59.8	65.2	73.6	67.9	69.9	57.7	71.2	51.3	59.6	71.8	87	124.1	159.3	75	73.5	61.7	78.6	67.6	78.8	63.5	82.6	72.4	79.5	60.9	66.5	69.7	82.7	138.6	148.2	85.9	94.3	109.3	139.5	132.3	149.6	170.3	194	203.2	269.3	202.8	233.1
High	A2AN08	E3 ubiquitin-protein ligase UBR4 OS=Mus musculus OX=10090 GN=Ubr4 PE=1 SV=1	EPTYQLNIHDIK	1xTMTpro [K12]; 1xTMTpro [N-Term]	59.5134	39	8.838e-06	176.5	193.7	200.4	231.6	205.2	222.5	156.7	213.4	164.2	184.9	301	312.8	629.6	819.6	298.8	313.3	143.3	171.8	133.1	186.3	133.4	193.9	142.1	168	126.6	141	209.2	292.9	554.8	628.9	258.9	262.5	256.4	241.3	219	214.9	234	194.3	184.8	215.2	199.2	202
High	A2AN08	E3 ubiquitin-protein ligase UBR4 OS=Mus musculus OX=10090 GN=Ubr4 PE=1 SV=1	ESAFQSEPR	1xTMTpro [N-Term]	27.9158	36	0.0001094	19.7	28.3	27.1	36.3	28.2	40.7	32.4	32.4	24.8	27.4	51.1	53.7	95.3	127.5	44.6	48.8	35.5	46.8	39.6	40.6	37	46.4	42	40.1	35.2	34.9	50.9	56.3	108.7	130.7	62.3	58.2	36.9	37.5	31.4	31.9	40	33.3	27.8	38.8	29.1	37.2
High	A2AN08	E3 ubiquitin-protein ligase UBR4 OS=Mus musculus OX=10090 GN=Ubr4 PE=1 SV=1	EVEENWSK	1xTMTpro [K8]; 1xTMTpro [N-Term]	45.4105	12	0.002933																																	103.5	119.2	87.5	110	111.5	94.7	80.8	111.6	94.5	100.9
High	A2AN08	E3 ubiquitin-protein ligase UBR4 OS=Mus musculus OX=10090 GN=Ubr4 PE=1 SV=1	FADKETLIQFLR	1xTMTpro [K4]; 1xTMTpro [N-Term]	84.7487	9	2.218e-05	23.1	32.1	25.4	38.8	31.3	33.5	24.7	22.4	25.2	26.5	44.4	53.7	97.4	131.8	49.7	45.9	199.5	224.9	193.7	257.5	164.4	237.7	188.3	221.5	173.4	164.6	358.2	423.3	820.1	992.4	356	366.8
High	A2AN08	E3 ubiquitin-protein ligase UBR4 OS=Mus musculus OX=10090 GN=Ubr4 PE=1 SV=1	FAMEQSFSADTGGGGR	1xTMTpro [N-Term]	57.8477	40	8.838e-06	55.4	67.5	69.9	83.7	65.7	87.6	59.5	71.8	66	70.3	102.4	98.1	154.5	197.4	93.8	95	74.5	98.9	96.8	99.3	88	106.5	105.8	111.1	120	123.6	119.2	171.4	147.3	181.7	122.1	133.4	97.4	94.3	87.8	83.2	79.2	69.2	69.8	83.3	85.6	76.1
High	A2AN08	E3 ubiquitin-protein ligase UBR4 OS=Mus musculus OX=10090 GN=Ubr4 PE=1 SV=1	FKPYCSFEK	1xCarbamidomethyl [C5]; 2xTMTpro [K2; K9]; 1xTMTpro [N-Term]	59.2291	2	0.0002461																	290.8	367.7	289.2	382.2	319.8	395	304.2	341.4	279.2	285.3	427.4	513.3	1016.8	1293.2	517.5	514.4
High	A2AN08	E3 ubiquitin-protein ligase UBR4 OS=Mus musculus OX=10090 GN=Ubr4 PE=1 SV=1	FLSRPALPFILR	1xTMTpro [N-Term]	86.7416	10	0.0001568																	13.1	9.8	11.9	13.1	14.5	14.3	15.9	14	12.8	10.5	18.3	13.2	20.5	29.4	15.8	12.9	30.8	32.1	28.3	30.7	30.1	38.3	31.5	40.9	33.3	27.7
High	A2AN08	E3 ubiquitin-protein ligase UBR4 OS=Mus musculus OX=10090 GN=Ubr4 PE=1 SV=1	GAAAIREEVR	1xTMTpro [N-Term]	30.2395	15	0.0003601	121.2	129.6	142.2	173.3	133.2	174.8	116.3	142.3	103.3	98	247.9	242.5	513.6	626.3	204	219.1	125.7	160.3	146.1	161.8	111.8	170.1	124.8	136.2	100.5	103.4	191.6	217.3	428.8	505.6	198.8	223.3	183	186.4	147.7	169	146.2	140	155.2	161.4	146.5	130.2
High	A2AN08	E3 ubiquitin-protein ligase UBR4 OS=Mus musculus OX=10090 GN=Ubr4 PE=1 SV=1	GITQNALDYMK	1xTMTpro [K11]; 1xTMTpro [N-Term]	66.0526	43	8.838e-06	182.6	188.9	250.1	269.8	250.3	277.7	203.4	231.7	163.1	164.7	228.4	232.7	412	512.4	265.3	271.2	179.4	210.3	199.3	219.1	201	245	232.2	226	177.2	162.5	232.2	248.4	484.5	552.6	283.8	301	216.2	197.4	182.8	197	192.9	170.1	173.8	184.6	153.6	165.4
High	A2AN08	E3 ubiquitin-protein ligase UBR4 OS=Mus musculus OX=10090 GN=Ubr4 PE=1 SV=1	GLCTGCSR	2xCarbamidomethyl [C3; C6]; 1xTMTpro [N-Term]	26.3194	17	0.0006295																																	29.3	44.8	34.1	33.7	38.8	35.7	31.8	31.6	39.1	25.2
High	A2AN08	E3 ubiquitin-protein ligase UBR4 OS=Mus musculus OX=10090 GN=Ubr4 PE=1 SV=1	GREEWESAALQNANTK	1xTMTpro [K16]; 1xTMTpro [N-Term]	47.7996	43	8.838e-06	50.7	58.2	67.1	72.8	62.4	76.8	49.1	61.5	52.8	48.5	115	123.1	196.5	255.5	95.3	97	132.4	162.7	144	169.4	156.5	181.3	162.9	144.4	119.5	116	207.3	278.8	495.8	548.3	244.3	236.2
High	A2AN08	E3 ubiquitin-protein ligase UBR4 OS=Mus musculus OX=10090 GN=Ubr4 PE=1 SV=1	GVLPYVGNLITK	1xTMTpro [K12]; 1xTMTpro [N-Term]	87.1752	37	8.838e-06	68.7	69.9	78.7	98.4	89.7	99.6	70.5	88.4	61.5	66.4	114.2	120.9	254.7	304.2	112.2	117.9	87.5	98.2	87.6	106.6	78.7	102.4	86.3	88.8	72.3	60.4	96.5	104.4	214.3	241.4	133.3	125.1	223.4	224	184.2	193.9	183.5	168.8	162.8	186.7	170.6	155.9
High	A2AN08	E3 ubiquitin-protein ligase UBR4 OS=Mus musculus OX=10090 GN=Ubr4 PE=1 SV=1	GWETDGPPAVLSIMAQSTSTQR	1xTMTpro [N-Term]	88.2312	72	8.838e-06	51.1	60.9	71.1	72.7	66.6	82.1	54.7	62	59.5	61.7	77.2	92.8	101.6	138.4	70.7	80.9																	73.6	80.4	66.7	63.6	73	68.7	72.2	67.7	79.8	81.1
High	A2AN08	E3 ubiquitin-protein ligase UBR4 OS=Mus musculus OX=10090 GN=Ubr4 PE=1 SV=1	HAAQELATLLLSLPAPASVQQQSK	1xTMTpro [K24]; 1xTMTpro [N-Term]	97.5199	30	8.838e-06	7.6	8.4	7.2	12.5	9.2	9.1	4.6	9.5	7.9	9.8	13.7	11.9	11.8	23.1	10.6	8.9
High	A2AN08	E3 ubiquitin-protein ligase UBR4 OS=Mus musculus OX=10090 GN=Ubr4 PE=1 SV=1	HILVSQGLIR	1xTMTpro [N-Term]	57.6074	13	0.001312	3	2.3	4	5	7.4	7.7	6.1	9.3	14.3	17.8	41.3	35.9	45.8	67.7	16.8	23.8			6.2	3.6	5.8	6	11.2	8.2	16	13	30.1	19.1	32.4	29.8	12.2	10.6	4.7	4.4	2.5	4.5	8.5	5.2	12	9.3	19	18.2
High	A2AN08	E3 ubiquitin-protein ligase UBR4 OS=Mus musculus OX=10090 GN=Ubr4 PE=1 SV=1	HLLTVLLK	1xTMTpro [K8]; 1xTMTpro [N-Term]	74.4934	31	3.33e-05	28.2	28.5	28	35.9	33.6	36.6	25.1	29.7	33.6	33.7	75.3	66.7	142.8	178.6	51.5	56.6	16.6	19.2	20.5	26.5	19.3	17.7	19.4	22.5	19.4	15.1	27	27	69.1	52.7	31	33.5	45.2	44.2	41.3	45.9	44.3	27.4	38.4	39.7	30.3	33.8
High	A2AN08	E3 ubiquitin-protein ligase UBR4 OS=Mus musculus OX=10090 GN=Ubr4 PE=1 SV=1	HNDMPIYEAADK	1xTMTpro [K12]; 1xTMTpro [N-Term]	47.94	29	8.838e-06	184.6	182.8	207.2	260.2	252.5	289.3	197.7	244.5	193.9	197.6	370.7	388.4	671.1	1001.8	341.2	344.2	223.5	263.6	272.6	330	303.3	390.7	415.2	408.4	525	542.5	692.6	774.7	839.8	940	514.9	534.4
High	A2AN08	E3 ubiquitin-protein ligase UBR4 OS=Mus musculus OX=10090 GN=Ubr4 PE=1 SV=1	HTACNEQQR	1xCarbamidomethyl [C4]; 1xTMTpro [N-Term]	12.2868	47	8.838e-06	5.6	8.2	10.5	7.4	6.4	7.5	10.3	9.6	6.7	5.8	12.5	11.6	21.3	25.1	10.9	8.8	7.5	10	8.4	12	9.7	8	10.3	10	7	6.4	13.3	12.8	27.4	31.8	10.7	12.7
High	A2AN08	E3 ubiquitin-protein ligase UBR4 OS=Mus musculus OX=10090 GN=Ubr4 PE=1 SV=1	HTLLSLVR	1xTMTpro [N-Term]	54.1998	29	0.0008081	47.3	44.2	48.5	66.6	51.8	60.5	43.6	51.8	41	48	78.5	77.9	135.8	171.8	63.8	70.6	62.3	62.7	60	83.6	59.9	79.2	65.3	72.7	61.9	62.4	97.9	103.6	172.7	210.4	87.3	92
High	A2AN08	E3 ubiquitin-protein ligase UBR4 OS=Mus musculus OX=10090 GN=Ubr4 PE=1 SV=1	IADTSSR	1xTMTpro [N-Term]	24.3865	14	0.001373	347.6	380.1	386.7	468.8	376.8	441.1	293.6	343.3	284.1	276.3	596.4	616.9	1266.5	1623.8	583.4	590.1	313.1	336.7	333.5	347.3	294	364.7	303.7	337.1	261.3	250.6	425.4	497.3	945.7	1113.4	528.7	515.1	120.8	115.6	98.9	94.8	86	88.9	76.5	83.3	80.9	73.2
High	A2AN08	E3 ubiquitin-protein ligase UBR4 OS=Mus musculus OX=10090 GN=Ubr4 PE=1 SV=1	IIPYLSFGEVEK	1xTMTpro [K12]; 1xTMTpro [N-Term]	93.2339	44	8.838e-06	78.2	87.4	94.9	123.9	106.6	105.1	83.2	103.4	79.7	83.9	174.2	178	362.9	430.5	136.8	160.5	118	139.8	132.9	138	130.9	168.8	135.7	163.7	127.4	118.9	233.9	241.9	495.9	546.7	236	235.8	88.9	93.9	87.4	83.9	88.2	75.5	75	79.2	84.1	74.1
High	A2AN08	E3 ubiquitin-protein ligase UBR4 OS=Mus musculus OX=10090 GN=Ubr4 PE=1 SV=1	IISLDLPVAEVYK	1xTMTpro [K13]; 1xTMTpro [N-Term]	96.3516	66	8.838e-06	97.6	90.7	103.4	122.6	103.3	123	105	118.4	90.3	88.2	165.3	167.5	377.8	429.3	158.4	161.9	128.7	156.9	149.6	170.1	132.6	186.1	145.4	165.7	137.3	142.2	205.2	255.7	480.2	560.6	241	261.5	144.4	130.7	125.8	140.7	138.7	125.1	122.5	125	112.7	113.4
High	A2AN08	E3 ubiquitin-protein ligase UBR4 OS=Mus musculus OX=10090 GN=Ubr4 PE=1 SV=1	IISLDLPVAEVYKK	2xTMTpro [K13; K14]; 1xTMTpro [N-Term]	89.4316	32	8.838e-06																																	250.9	249.4	204.5	215.3	233.7	187.6	208	226.6	198.7	204.6
High	A2AN08	E3 ubiquitin-protein ligase UBR4 OS=Mus musculus OX=10090 GN=Ubr4 PE=1 SV=1	ILGPAESDEFLAR	1xTMTpro [N-Term]	70.9554	75	8.838e-06	111	115.7	122.5	145.7	121.8	150.2	102.7	115.2	89.4	103.7	212.5	207.9	469.8	566.3	201.6	202.9	101.1	112.4	91.7	108.2	97.7	107.3	97.9	107.6	78.7	74.8	84.6	90.9	164.3	195.8	116	117.9	155.4	142.6	108.9	111.7	109.3	81	86.5	105.1	92	81.6
High	A2AN08	E3 ubiquitin-protein ligase UBR4 OS=Mus musculus OX=10090 GN=Ubr4 PE=1 SV=1	IQIGTQAIER	1xTMTpro [N-Term]	53.1514	40	8.838e-06	211.4	225.1	250	291.5	256.2	290.1	207	248.9	206.3	235.1	418.4	446.1	835.2	1046.4	371.3	373.9	275.4	318.7	312.1	326.9	321.5	384	329.3	337.3	277.5	304.5	420.5	471.1	889.1	974.3	447.6	454.7	298.4	298.5	246.9	280.2	287.6	236.6	243.6	268.9	237.7	234.8
High	A2AN08	E3 ubiquitin-protein ligase UBR4 OS=Mus musculus OX=10090 GN=Ubr4 PE=1 SV=1	ISSYVSWIK	1xTMTpro [K9]; 1xTMTpro [N-Term]	81.8659	31	5.039e-05	51.9	60.7	47.7	68.5	70.6	77.6	40.9	77.6	43.3	52.8	137	135	333.1	455	124.2	123.8	68.5	84.4	61.1	93	60.2	73.7	58.9	70.5	51.1	55.2	98.2	114.7	260.4	312.9	121.7	119.8	218.7	238.5	192	182.6	190.4	161.2	159.2	174.9	153	141.4
High	A2AN08	E3 ubiquitin-protein ligase UBR4 OS=Mus musculus OX=10090 GN=Ubr4 PE=1 SV=1	KELLEYDLQQR	1xTMTpro [K1]; 1xTMTpro [N-Term]	59.1295	16	2.218e-05	139.1	166	185.3	201.4	185.7	214.6	154.1	197.5	142.8	138.8	282.2	317.3	572.9	749.5	267.7	270.5	125.8	141.4	148.3	158.3	135	186.8	136.8	174.8	136.4	126.1	196.4	236.2	434.5	516.7	217.8	222.6
High	A2AN08	E3 ubiquitin-protein ligase UBR4 OS=Mus musculus OX=10090 GN=Ubr4 PE=1 SV=1	KIADTSSR	1xTMTpro [K1]; 1xTMTpro [N-Term]	27.7052	1	0.001523																	123.6	147	133.5	163	143.8	194.9	151.4	178.2	134.6	122.9	216.8	263.9	607.8	670.5	247.9	259.4	303.9	292.3	264.7	289.4	284.5	270.6	251.1	306.2	241.1	244.5
High	A2AN08	E3 ubiquitin-protein ligase UBR4 OS=Mus musculus OX=10090 GN=Ubr4 PE=1 SV=1	KLLLFICGSK	1xCarbamidomethyl [C7]; 2xTMTpro [K1; K10]; 1xTMTpro [N-Term]	82.2635	32	8.838e-06																	71.9	85.3	85.5	96.7	80.7	102.9	91.4	105.9	78.7	72.1	136.2	164.7	337.9	383.5	174.5	171.8	126.3	134.2	100.8	108.5	114.7	102.5	105.7	116.2	104.4	92.3
High	A2AN08	E3 ubiquitin-protein ligase UBR4 OS=Mus musculus OX=10090 GN=Ubr4 PE=1 SV=1	KLSLFIGASVDPAGVTMIDAVK	2xTMTpro [K1; K22]; 1xTMTpro [N-Term]	97.1548	43	8.838e-06	12.4	12.3	15.1	23.3	12.7	21	14.6	14.3	13.7	12.1	18.3	17.1	41.9	52.8	20.7	23.1
High	A2AN08	E3 ubiquitin-protein ligase UBR4 OS=Mus musculus OX=10090 GN=Ubr4 PE=1 SV=1	KVPTSNTEGGWSCSLAEYIR	1xCarbamidomethyl [C13]; 1xTMTpro [K1]; 1xTMTpro [N-Term]	67.5569	58	8.838e-06	48.1	53.1	65.3	66.9	61.5	79.7	44.9	65	47.9	43.8	127.3	141.8	349.1	483.2	113.4	127.5	29.7	21.9	20.9	23.9	25.1	27.5	20.2	20.9	23.5	20.3	47.3	52.7	132.8	135	51.7	49.5
High	A2AN08	E3 ubiquitin-protein ligase UBR4 OS=Mus musculus OX=10090 GN=Ubr4 PE=1 SV=1	KVQLTPGQTEVK	2xTMTpro [K1; K12]; 1xTMTpro [N-Term]	49.1423	40	8.838e-06	153.9	149.3	192.2	196.6	193.2	235.6	165.5	219.7	152	173.3	348.5	351.1	706.3	848.4	296.2	290.5
High	A2AN08	E3 ubiquitin-protein ligase UBR4 OS=Mus musculus OX=10090 GN=Ubr4 PE=1 SV=1	LCTFTITQK	1xCarbamidomethyl [C2]; 1xTMTpro [K9]; 1xTMTpro [N-Term]	66.0736	36	2.785e-05	51.3	52.3	56.8	69.5	74.5	74.2	51.4	78.6	43.4	58.3	122.9	130.3	327.7	421.9	108.8	128.1	24.3	28	20.6	33.1	28.4	30.7	25.8	29	19.3	22	32.6	31.8	80.2	105.8	41.3	41.9	56.3	53.2	49.7	58.8	66.8	48.8	45	54.1	48.6	44.8
High	A2AN08	E3 ubiquitin-protein ligase UBR4 OS=Mus musculus OX=10090 GN=Ubr4 PE=1 SV=1	LDRTEIITFTAMMK	1xTMTpro [K14]; 1xTMTpro [N-Term]	84.5584	31	8.838e-06	61.8	70.7	77.7	97.4	75.2	98.6	67.2	89	60.2	59.6	129.1	136.4	304	411.7	142.4	130.1	67.3	86.1	74	81.6	61.1	68.4	69.1	69.2	62.7	62.6	110.4	113.1	258.5	307.7	115.2	120.5	67.4	86.4	69.2	72.5	65.9	58.3	56.7	69.9	58.2	57.3
High	A2AN08	E3 ubiquitin-protein ligase UBR4 OS=Mus musculus OX=10090 GN=Ubr4 PE=1 SV=1	LENPDEACAVSQK	1xCarbamidomethyl [C8]; 1xTMTpro [K13]; 1xTMTpro [N-Term]	47.1025	46	8.838e-06	115	113.7	128	163.9	128.6	130.8	98.2	137.2	92.9	106.5	156.9	161.8	260.2	353.8	159.1	156
High	A2AN08	E3 ubiquitin-protein ligase UBR4 OS=Mus musculus OX=10090 GN=Ubr4 PE=1 SV=1	LEQVSSDEGIGTLAENLLEALR	1xTMTpro [N-Term]	98.2421	95	8.838e-06																	73.5	83.2	77.5	88.2	71.3	89.4	75.2	80.5	71.6	67.3	74.5	87.8	130.9	133.9	99.8	88.5	68.3	77	61.5	62.2	67.6	61.5	61.3	69.8	68.3	60.8
High	A2AN08	E3 ubiquitin-protein ligase UBR4 OS=Mus musculus OX=10090 GN=Ubr4 PE=1 SV=1	LFSYCVK	1xCarbamidomethyl [C5]; 1xTMTpro [K7]; 1xTMTpro [N-Term]	68.5716	24	0.001344	45.9	53.1	56.3	60.2	69	71.1	42.6	58.3	52.3	43.7	123.9	112	271.5	363	100.7	95.3
High	A2AN08	E3 ubiquitin-protein ligase UBR4 OS=Mus musculus OX=10090 GN=Ubr4 PE=1 SV=1	LGHNNWLR	1xTMTpro [N-Term]	45.948	35	0.0001286	194.1	217.7	221.8	258.1	213.5	244.2	186.9	201.5	166.4	164.2	334.9	338.9	660.8	818	305.2	309.6	77.2	97.1	85.2	89.9	68.3	95.7	77.9	85.9	65	75.4	122.2	146	242.4	292.8	122.7	122.3	241.2	214.8	198.8	210.8	214.2	184.9	185.9	216.1	191.8	193.6
High	A2AN08	E3 ubiquitin-protein ligase UBR4 OS=Mus musculus OX=10090 GN=Ubr4 PE=1 SV=1	LIDSVPLTNLLLTLLSTSYR	1xTMTpro [N-Term]	98.8635	57	8.838e-06																	24.3	32.9	26.2	33	26.5	32.1	22.6	28.6	26.7	22.8	25.2	33.9	34	42.4	31.1	38.1
High	A2AN08	E3 ubiquitin-protein ligase UBR4 OS=Mus musculus OX=10090 GN=Ubr4 PE=1 SV=1	LIGSHTISK	1xTMTpro [K9]; 1xTMTpro [N-Term]	45.1406	16	0.000567	6.3	10.4	8.1	11.9	9	8.7	8	8.7	4.8	5.4	9.1	11	20.7	33.1	10.6	8.1
High	A2AN08	E3 ubiquitin-protein ligase UBR4 OS=Mus musculus OX=10090 GN=Ubr4 PE=1 SV=1	LLASLFQDLQVEALHK	1xTMTpro [K16]; 1xTMTpro [N-Term]	98.1204	67	8.838e-06																	15.4	19.1	27.8	29	23.1	26.9	20	25.6	22.6	21.1	30.3	38.1	113.9	120.9	46.9	48.2
High	A2AN08	E3 ubiquitin-protein ligase UBR4 OS=Mus musculus OX=10090 GN=Ubr4 PE=1 SV=1	LLEEQGIFLR	1xTMTpro [N-Term]	78.0873	22	2.785e-05	263.7	301.9	259.2	309.2	247.7	278.6	199.7	225.9	180.9	190.4	410.4	441.5	793.1	965.1	359.5	384.1	94.4	127	84.6	94.9	51.8	62.3	44.5	50.7	36.6	44.1	74.4	69.9	125.9	159.1	77.6	86.7	92.1	91	68	74.1	63.2	59.8	48.2	57.2	53	54.3
High	A2AN08	E3 ubiquitin-protein ligase UBR4 OS=Mus musculus OX=10090 GN=Ubr4 PE=1 SV=1	LLLFICGSK	1xCarbamidomethyl [C6]; 1xTMTpro [K9]; 1xTMTpro [N-Term]	93.4806	27	0.000303	5.6	12.8	9.2	10.6	12	9.3	8.3	13.4	8.6	8.1	13.6	10.8	33.9	40.4	16	18.4	16.1	15.9	16.1	12.7	16.3	16.5	13.6	14.6	12.8	11.1	26.7	21.6	56.8	67.3	23.1	25.4
High	A2AN08	E3 ubiquitin-protein ligase UBR4 OS=Mus musculus OX=10090 GN=Ubr4 PE=1 SV=1	LLLIWQHK	1xTMTpro [K8]; 1xTMTpro [N-Term]	80.4617	28	0.0001016																	6	6.1	7.7	9.1	7.8	12	4.5	7.3	7.9	5.9	7.1	9.9	21.8	31	6.9	9.5	9.6	12.9	7.6	11.8	9.5	8.4	7.4	8.9	9.5	8.1
High	A2AN08	E3 ubiquitin-protein ligase UBR4 OS=Mus musculus OX=10090 GN=Ubr4 PE=1 SV=1	LLQTLPQLR	1xTMTpro [N-Term]	73.6472	44	0.0001645	229	250.1	253.7	314.8	250.8	290.3	216.7	255.3	220.9	231.9	316.8	331.8	468.2	537.7	290.8	314.3	71.6	78.2	79.9	84.5	58.4	84.2	63.2	74	53.8	56.2	88.9	105.5	199	227.2	92.5	104.6	327.6	306.3	233.5	253.6	219.9	193.8	186.6	190.8	201.8	184.3
High	A2AN08	E3 ubiquitin-protein ligase UBR4 OS=Mus musculus OX=10090 GN=Ubr4 PE=1 SV=1	LLSVFMSR	1xTMTpro [N-Term]	87.0514	31	3.865e-05	139.4	138.9	151.6	173.9	161.5	181.6	141.1	155.3	122.5	117.3	333.8	320.2	757.5	933.6	285.1	272.7	12.1	11.6	9.2	12.3	11	9.8	12.9	9.2	9.6	8.4	20.9	16.7	57.2	58	25.4	18.7	13.4	12.4	12.8	7.6	12.5	10.4	7.8	10.1	14.9	5.8
High	A2AN08	E3 ubiquitin-protein ligase UBR4 OS=Mus musculus OX=10090 GN=Ubr4 PE=1 SV=1	LVGTVLNGYLCLR	1xCarbamidomethyl [C11]; 1xTMTpro [N-Term]	90.2721	38	2.218e-05	25	24.4	32	40.6	40.3	44.6	35.6	43.1	32.3	36.9	47.4	43.3	61	90.9	40.8	47.3	42.8	37.4	43.5	42	38	45.1	38.3	35.8	41.6	32.4	44.9	53.1	79	83.9	53.9	62.7
High	A2AN08	E3 ubiquitin-protein ligase UBR4 OS=Mus musculus OX=10090 GN=Ubr4 PE=1 SV=1	MPGNPYSSNEPGIGPLMR	1xTMTpro [N-Term]	68.6925	65	8.838e-06	162.1	146.6	184.3	190.1	170.3	182.4	159.1	175.7	137	163.5	178.3	182.3	276.9	321.1	203.1	210.9	181.4	233.9	187.4	267.6	214.9	251	188.2	209	175.8	184.2	143.8	182	228.4	250.5	207.3	208.6	182.7	148.8	167.5	159.9	160.5	162.2	148.2	154.3	144.5	144.8
High	A2AN08	E3 ubiquitin-protein ligase UBR4 OS=Mus musculus OX=10090 GN=Ubr4 PE=1 SV=1	MQILVER	1xTMTpro [N-Term]	57.5533	23	0.001693	177.5	183.9	212.4	258.5	222.6	251	188.6	232	176.7	183.8	392.9	400.5	767.9	938.9	334.6	344.5	201.3	251.8	236.5	252.1	209.9	275.8	225.1	263.5	196.1	195	367	409.8	803.1	939.5	365.3	385	217.2	242.1	200.9	210.7	228.3	200.2	195.5	233.8	207.4	219.3
High	A2AN08	E3 ubiquitin-protein ligase UBR4 OS=Mus musculus OX=10090 GN=Ubr4 PE=1 SV=1	MTTSPPKDSDQLEVIQENR	1xTMTpro [K7]; 1xTMTpro [N-Term]	53.272	54	8.838e-06	90.4	97.3	126.9	137.7	124	145.1	102.8	117.4	82.8	94.3	219.2	244.3	521.9	713.9	208.9	206.9	140.6	142	137	142.5	112.2	142.6	122.2	128.4	125.5	90.3	159.6	183.2	326.1	357.1	181.2	184.8	134.9	126.1	106.8	119.4	123.7	118.1	121.1	123.9	102.9	97.9
High	A2AN08	E3 ubiquitin-protein ligase UBR4 OS=Mus musculus OX=10090 GN=Ubr4 PE=1 SV=1	MVDGVGVCTVCAK	2xCarbamidomethyl [C8; C11]; 1xTMTpro [K13]; 1xTMTpro [N-Term]	59.2134	56	8.838e-06	135.9	153.6	163	215.8	167.5	226.9	146.6	210.1	127.9	140.9	231.2	270.6	507.8	669.3	232.8	246.9																	178.3	170.5	158.9	169.5	177.7	176	169.3	205.2	171.5	183.5
High	A2AN08	E3 ubiquitin-protein ligase UBR4 OS=Mus musculus OX=10090 GN=Ubr4 PE=1 SV=1	NQLQSVAAACK	1xCarbamidomethyl [C10]; 1xTMTpro [K11]; 1xTMTpro [N-Term]	46.4911	40	8.838e-06	65.8	77.1	91.5	104.8	83.3	98.9	69.2	81	61.5	65.6	132.9	120	225.9	310	103.5	127.9
High	A2AN08	E3 ubiquitin-protein ligase UBR4 OS=Mus musculus OX=10090 GN=Ubr4 PE=1 SV=1	NSFDELSK	1xTMTpro [K8]; 1xTMTpro [N-Term]	51.8353	1	0.0004289	155.6	158.5	195.6	255.7	207	240.4	181.6	211.4	201	205.3	419.8	438.4	556	731	287.8	306.1
High	A2AN08	E3 ubiquitin-protein ligase UBR4 OS=Mus musculus OX=10090 GN=Ubr4 PE=1 SV=1	QHLAVSHEK	1xTMTpro [K9]; 1xTMTpro [N-Term]	27.2145	28	3.33e-05	190.6	206.4	213	279.9	219.9	270.9	186.4	255.4	173.3	168.3	378.8	388	821.8	1089.7	345.8	348.1
High	A2AN08	E3 ubiquitin-protein ligase UBR4 OS=Mus musculus OX=10090 GN=Ubr4 PE=1 SV=1	QKEVQMNFLNQLTSVFNPR	1xTMTpro [K2]; 1xTMTpro [N-Term]	97.4113	74	8.838e-06	89.8	102	122.1	146.1	116.7	140.6	100.2	122.4	95.1	83.6	203.9	231.1	487.3	640.5	202.5	188	16.1	20.1	11.1	23.8	16.5	22.4	20.3	22.5	14.9	16.4	28.1	33.4	74.7	92.9	35.6	35.3	36.2	39	46.1	38.8	36.8	38.5	41.2	44.1	39.6	35.5
High	A2AN08	E3 ubiquitin-protein ligase UBR4 OS=Mus musculus OX=10090 GN=Ubr4 PE=1 SV=1	QLESSQAR	1xTMTpro [N-Term]	22.8152	19	0.0002864	101.4	105.9	130.8	146.1	130.2	146.8	113.6	122.7	108	107.8	259.9	237	446	533.7	180	203.8
High	A2AN08	E3 ubiquitin-protein ligase UBR4 OS=Mus musculus OX=10090 GN=Ubr4 PE=1 SV=1	QLLQLLTTYIVR	1xTMTpro [N-Term]	98.289	40	8.838e-06																	108.4	112.8	97.7	127.8	102.5	119.7	92.4	106	97.5	91.4	152	165.6	283.6	330.7	157	161.2	110.1	104.4	91.9	84.1	84.3	73.6	80.3	92.5	99.5	88.7
High	A2AN08	E3 ubiquitin-protein ligase UBR4 OS=Mus musculus OX=10090 GN=Ubr4 PE=1 SV=1	QLMCLLTR	1xCarbamidomethyl [C4]; 1xTMTpro [N-Term]	70.9654	39	0.0002079	138.7	163.7	172.3	199.6	183	204	133.3	162.1	128.2	130.9	305.6	286.4	567.6	716.6	237.8	247.2	199.3	223.9	199.4	224.9	184.9	249.3	193.6	211.2	192.9	162.2	312.4	341	674.1	750.2	281.6	298.7	16.8	12.3	9.7	10.1	13.4	11.6	9.5	14.3	10.1	7.1
High	A2AN08	E3 ubiquitin-protein ligase UBR4 OS=Mus musculus OX=10090 GN=Ubr4 PE=1 SV=1	QVLFTPATQAAR	1xTMTpro [N-Term]	55.009	31	2.785e-05	217	252.2	267.4	297.7	228.9	263.7	188.4	232.4	176.2	187.9	385.9	398.9	793.3	983.6	334.7	351.1	291	376.5	276.3	349.8	248	345.1	225.1	286.9	208.8	245.1	319.8	385.6	662.8	754.1	360.4	378.2	218.1	191.4	155.6	153.1	173.9	139.4	147.8	164.9	138.2	129.2
High	A2AN08	E3 ubiquitin-protein ligase UBR4 OS=Mus musculus OX=10090 GN=Ubr4 PE=1 SV=1	SALNEVHLVVMR	1xTMTpro [N-Term]	62.5217	64	8.838e-06	77.6	81.8	84.1	102.7	86.4	102.2	83.1	89.8	83.7	99.3	167.2	156.4	261.5	320.7	134.1	134.7	62.1	69.6	63.3	72.1	61.6	90.1	70.8	79.3	71.7	64	121.1	125.6	199.2	239.6	108.4	109.5	84.4	88.1	78.6	88	82.3	75.6	83.8	89.9	107	103
High	A2AN08	E3 ubiquitin-protein ligase UBR4 OS=Mus musculus OX=10090 GN=Ubr4 PE=1 SV=1	SNPSVLQGLLR	1xTMTpro [N-Term]	68.4691	31	8.838e-06	261.5	280.4	307.7	377.5	294.1	353.9	266.5	299.5	230.4	236.2	503.8	530.8	1103.4	1343.7	447	452	172.5	209.6	180.2	195.6	164.2	216.7	166.4	191.3	165.7	148.7	262.9	272.2	561.4	654.5	269.4	257.8	371.4	351.4	319.1	308	326.3	291.2	289.8	314.7	302.7	286.7
High	A2AN08	E3 ubiquitin-protein ligase UBR4 OS=Mus musculus OX=10090 GN=Ubr4 PE=1 SV=1	SSNGGSK	1xTMTpro [K7]; 1xTMTpro [N-Term]	19.8452	28	0.0004173	61.1	67.3	78.8	105.3	102.5	121	91.6	100.2	89.7	90	198.1	207.6	361.3	484.9	149.9	146.6	54.6	54.5	57.7	67.5	60.9	86.6	75	90.6	66	64.8	118.8	132.8	275.8	373.7	122.9	121.5
High	A2AN08	E3 ubiquitin-protein ligase UBR4 OS=Mus musculus OX=10090 GN=Ubr4 PE=1 SV=1	SSNGGSK	1xDeamidated [N3]; 1xTMTpro [K7]; 1xTMTpro [N-Term]	19.9488	15	0.0006171																	184.8	236.9	208.6	257.2	206.5	274.2	219.7	259	197.9	179.5	359.1	413.2	780.8	929	372	359.3
High	A2AN08	E3 ubiquitin-protein ligase UBR4 OS=Mus musculus OX=10090 GN=Ubr4 PE=1 SV=1	SVFIAQNVASLQELGGSEK	1xTMTpro [K19]; 1xTMTpro [N-Term]	80.9633	76	8.838e-06	23.8	31.7	32.6	35.1	38	38.3	30.8	31	23.9	31.7	49.9	48.8	81.9	106.8	40.5	48.7	78.8	92.2	102.6	102.4	94.8	118.3	130.8	117	114	92	128.2	145.7	193.2	228.1	140	139.2	57.9	49.9	52.6	48.3	50.5	43.4	48.4	40.9	53.7	49.7
High	A2AN08	E3 ubiquitin-protein ligase UBR4 OS=Mus musculus OX=10090 GN=Ubr4 PE=1 SV=1	TAPLILAR	1xTMTpro [N-Term]	57.6555	11	0.001013	115	111.7	128.9	153.8	139.6	156.5	97.2	126.2	103.5	99.8	246.1	248.3	615.5	865.4	219.1	237.2	166.4	164.1	157.9	202.2	160.3	183.7	142.7	186.9	154.4	149.8	283	294.5	662.7	823.8	268.1	269.9	207.6	191.2	185.2	195.3	193.6	172.7	166.6	203.4	177.9	168
High	A2AN08	E3 ubiquitin-protein ligase UBR4 OS=Mus musculus OX=10090 GN=Ubr4 PE=1 SV=1	TATITAR	1xTMTpro [N-Term]	29.2853	12	0.001593																	196.4	235.3	151.4	167.7	98.9	149.7	108.8	108.9	95.4	74.8	122.9	134.4	224.5	277.7	145.7	163.6	300.1	290.2	207.4	222.2	189.6	159	158.5	172.2	154.7	142.6
High	A2AN08	E3 ubiquitin-protein ligase UBR4 OS=Mus musculus OX=10090 GN=Ubr4 PE=1 SV=1	TINLYYNNR	1xTMTpro [N-Term]	51.2394	19	6.035e-05	311.5	330.1	336.3	405.1	338.7	382.1	268.7	330.1	306	308	619.8	593.9	990.7	1213.6	502.1	500	167.8	213.1	159.4	207.2	153.4	218.5	145	201.8	149.3	154.6	230.9	259.9	467.8	564	226.9	255.8	489.1	489.3	390.6	414.6	385.3	311.1	327	362.5	372.3	335.4
High	A2AN08	E3 ubiquitin-protein ligase UBR4 OS=Mus musculus OX=10090 GN=Ubr4 PE=1 SV=1	TKEGVGSPK	2xTMTpro [K2; K9]; 1xTMTpro [N-Term]	33.7516	3	0.0001094	148.2	135.3	173.1	231	218.7	243.5	167.2	195.6	132.1	122.5	255.7	271.2	643.8	838.9	260	259.4	125.8	140.7	119.5	146.4	124	150.6	132.9	159.8	113.7	80.3	165.1	176.7	409.4	496.5	196.3	206.6
High	A2AN08	E3 ubiquitin-protein ligase UBR4 OS=Mus musculus OX=10090 GN=Ubr4 PE=1 SV=1	TLSDVEDQKELASPVSPELR	1xTMTpro [K9]; 1xTMTpro [N-Term]	63.3194	51	8.838e-06																	51.2	62.6	69.4	81.5	64.2	109.3	90.3	99.8	73.5	64.7	121.6	165.7	327.3	402.2	153.4	143.5	121.6	128.5	104.5	117.3	143.2	122.2	119.9	153.7	126	120.6
High	A2AN08	E3 ubiquitin-protein ligase UBR4 OS=Mus musculus OX=10090 GN=Ubr4 PE=1 SV=1	TMQLNLSR	1xTMTpro [N-Term]	48.5297	17	0.0001745																	33.8	39.8	35.9	54.4	33.1	43.1	41.1	42.3	35.7	30.2	57.3	59.9	110.1	130.6	56.8	51.5	182.6	173	140.2	156.8	131.6	114.9	116.8	134	111.1	106.2
High	A2AN08	E3 ubiquitin-protein ligase UBR4 OS=Mus musculus OX=10090 GN=Ubr4 PE=1 SV=1	TPVFIFER	1xTMTpro [N-Term]	72.8869	14	0.002411	191.4	216.3	219.4	253.8	223	250.1	171.8	219.7	165.4	179.8	377.1	395.1	845.5	988	334.5	355																	292.7	262.3	249.1	259.9	272.4	216.7	232.1	257.7	237.3	228.4
High	A2AN08	E3 ubiquitin-protein ligase UBR4 OS=Mus musculus OX=10090 GN=Ubr4 PE=1 SV=1	TPVVVENITLMCLR	1xCarbamidomethyl [C12]; 1xTMTpro [N-Term]	85.1455	45	8.838e-06																																	52.8	47.6	47.5	46.7	50.3	37.6	50.7	46.4	54	40.4
High	A2AN08	E3 ubiquitin-protein ligase UBR4 OS=Mus musculus OX=10090 GN=Ubr4 PE=1 SV=1	TSVQPTFTASQYR	1xTMTpro [N-Term]	46.7723	32	7.513e-05	63.9	71.5	76.1	81.9	62.7	61.6	55.5	66.8	68.9	70	96.7	94.1	125.3	154.5	82.8	95.1	130.4	153.2	117.7	148	118.9	123.2	96.5	119.8	109.6	102.6	138.5	166.8	210.8	240.9	136.3	150.7	132.3	103.4	96.2	103.8	95	81.5	78.4	93.9	95.9	91.9
High	A2AN08	E3 ubiquitin-protein ligase UBR4 OS=Mus musculus OX=10090 GN=Ubr4 PE=1 SV=1	TTPLDLK	1xTMTpro [K7]; 1xTMTpro [N-Term]	57.6757	9	0.002481	667.2	735.4	638.2	817.3	516.1	619.3	395	513.2	364.3	368.7	729.7	737.7	1403	1876.4	643.5	757.8	686.6	876	618.6	721	462.1	691.4	477.1	587.4	433	422.2	697.1	806.3	1544.3	1821.3	764.6	798.4	387.9	420	207.6	225	139.8	114.9	108.6	105.2	93.2	91.5
High	A2AN08	E3 ubiquitin-protein ligase UBR4 OS=Mus musculus OX=10090 GN=Ubr4 PE=1 SV=1	TVPSPPISPQALVEGENDEQSSPDQVSAAK	1xTMTpro [K30]; 1xTMTpro [N-Term]	73.0145	59	8.838e-06	50.4	59	62.3	76.1	70.1	77.4	58	65.4	65.7	56	98.4	109.9	181.9	238.8	91.1	98.2	81.5	87.2	90.3	90	77.2	108.3	92.1	113.3	96.5	75.4	129	130.5	235.2	294.7	122.8	130.6	123.3	111	107.2	101.3	112.7	92.1	103.8	125.1	125.9	112.5
High	A2AN08	E3 ubiquitin-protein ligase UBR4 OS=Mus musculus OX=10090 GN=Ubr4 PE=1 SV=1	TVQAIVELK	1xTMTpro [K9]; 1xTMTpro [N-Term]	70.3844	28	0.000232	33.9	36.3	46.6	53.5	55.3	52.1	45.3	57.9	49.7	54.2	102.7	98.2	168.1	194.1	86.3	69.2																	96.2	116.8	112.4	111.4	149.1	139	146.3	169.6	235.5	271.3
High	A2AN08	E3 ubiquitin-protein ligase UBR4 OS=Mus musculus OX=10090 GN=Ubr4 PE=1 SV=1	VALEEMENKPR	1xTMTpro [K9]; 1xTMTpro [N-Term]	52.1097	17	5.039e-05																																	364.4	357.1	348.5	373.3	378.1	337.2	335.9	376	292.3	266
High	A2AN08	E3 ubiquitin-protein ligase UBR4 OS=Mus musculus OX=10090 GN=Ubr4 PE=1 SV=1	VCLNLPYFLR	1xCarbamidomethyl [C2]; 1xTMTpro [N-Term]	91.5121	24	2.218e-05	191.9	232.2	245.2	281.6	249.1	304.9	220.7	240.8	225.9	249.7	481.4	476.5	874.4	1079.8	377.2	395.6	190.5	231.1	209.5	230.2	196.5	237.3	195.2	237.9	209.7	200	344	381.5	645.2	713.5	319.9	344.7	208.1	210.6	167.8	173.9	182.4	156.8	150	193	184.4	169.2
High	A2AN08	E3 ubiquitin-protein ligase UBR4 OS=Mus musculus OX=10090 GN=Ubr4 PE=1 SV=1	VLGIYTFTK	1xTMTpro [K9]; 1xTMTpro [N-Term]	81.0358	22	0.0002736	42.6	51.4	66.9	71.1	71.7	80.4	66.3	77	62.8	65.2	85.9	90.7	151	183.9	79.6	82.9	60.2	69	52.5	70	59.5	80.4	66.7	77.7	57	53.1	86.6	94.4	239.7	251.6	102.2	104.4	91.1	71.5	63.7	68.4	77.2	68	70.7	77.4	60.7	61.4
High	A2AN08	E3 ubiquitin-protein ligase UBR4 OS=Mus musculus OX=10090 GN=Ubr4 PE=1 SV=1	VLIEFSLLR	1xTMTpro [N-Term]	95.4211	11	0.001359	11.1	12.4	19.4	17.2	20.8	23.4	16.1	23.3	23.2	26.5	31.8	36.7	49.2	58.7	26.3	26
High	A2AN08	E3 ubiquitin-protein ligase UBR4 OS=Mus musculus OX=10090 GN=Ubr4 PE=1 SV=1	VNEAAPEKPQEDSGTAGGISSTSASVNR	1xTMTpro [K8]; 1xTMTpro [N-Term]	39.7165	90	8.838e-06	37.7	32.4	48.3	50.4	47.2	50	39.5	48.3	33.2	35.1	65.7	78.4	139.2	174.8	58.5	61.2	58.6	66.9	52.1	72.2	62.2	74.5	66.3	82.4	67.4	49.2	102.1	119.9	215.1	278.7	102.6	111.5	40.6	44.8	40.8	41.8	43.3	36.5	37.8	39.2	38.5	36.8
High	A2AN08	E3 ubiquitin-protein ligase UBR4 OS=Mus musculus OX=10090 GN=Ubr4 PE=1 SV=1	VNEAAPEKPQEDSGTAGGISSTSASVNR	1xDeamidated [Q10]; 1xTMTpro [K8]; 1xTMTpro [N-Term]	39.6633	85	8.838e-06																	44.9	49.7	42.8	49.6	41.1	60	43.2	45.3	38.3	32.4	58.8	76.7	153.7	175.6	70.3	75.4
High	A2AN08	E3 ubiquitin-protein ligase UBR4 OS=Mus musculus OX=10090 GN=Ubr4 PE=1 SV=1	VPTSNTEGGWSCSLAEYIR	1xCarbamidomethyl [C12]; 1xTMTpro [N-Term]	75.4257	86	8.838e-06																	61.7	71.6	63.9	79.1	67.5	81.7	72.5	77.6	72.6	64	73.7	86.5	117.4	116.2	79.4	84.8
High	A2AN08	E3 ubiquitin-protein ligase UBR4 OS=Mus musculus OX=10090 GN=Ubr4 PE=1 SV=1	VRDILSR	1xTMTpro [N-Term]	41.8942	19	0.004321	33.8	43.1	48.6	62.7	47.4	51.8	30.7	51.6	38.7	37.2	68.2	75.2	156.9	193.3	60.7	69	74.3	79.3	76	79.6	69.9	80.7	74.5	78.8	51.6	50.9	94.5	114.3	224.4	280.4	109.2	104.4	47.8	47.5	45.4	39.7	37.9	32.6	33.1	37.4	35	31.3
High	A2AN08	E3 ubiquitin-protein ligase UBR4 OS=Mus musculus OX=10090 GN=Ubr4 PE=1 SV=1	VSESLVR	1xTMTpro [N-Term]	41.1702	22	0.001257	201	220	239.4	279.1	246.7	279.3	213.8	229.5	186.7	207.3	358.3	382.3	642.5	823.6	320.4	336.4	275.2	324.3	302.4	333.2	275.3	361.1	304.8	333.4	297	251.8	479.7	546.3	971	1141.7	450.4	466	175.2	164.8	151.8	146.4	170.8	137.6	155.8	158	155	150
High	A2AN08	E3 ubiquitin-protein ligase UBR4 OS=Mus musculus OX=10090 GN=Ubr4 PE=1 SV=1	VTISDGKVTDEEKPK	3xTMTpro [K7; K13; K15]; 1xTMTpro [N-Term]	49.138	6	0.001185																	142.9	172.9	185.3	194.7	169.9	233.5	234.6	262.5	162.9	136.8	271.9	298.4	662	722.4	353.8	334.3	118.6	131	110.9	117.9	120.6	94.9	126	129.3	116.4	117.4
High	A2AN08	E3 ubiquitin-protein ligase UBR4 OS=Mus musculus OX=10090 GN=Ubr4 PE=1 SV=1	VWCATNEGEPMR	1xCarbamidomethyl [C3]; 1xTMTpro [N-Term]	51.3804	44	8.838e-06	58.1	64.3	77.2	87.6	78.5	83.9	60.3	76.5	65.5	70.8	110.8	122.3	119.8	168	83	87.3	67.7	81.4	83.8	83.9	74.9	103.6	80	88	86	82	152.4	168.9	233.8	277.6	138.8	125.8	83	85.5	81.1	79.4	86.8	70.7	81	85.2	105.9	98.6
High	A2AN08	E3 ubiquitin-protein ligase UBR4 OS=Mus musculus OX=10090 GN=Ubr4 PE=1 SV=1	VYHQLMGHRPQLENLLCK	1xCarbamidomethyl [C17]; 1xTMTpro [K18]; 1xTMTpro [N-Term]	62.7978	11	8.838e-06	50.8	52.7	59.1	71.3	62.5	68	53.4	60.5	52.5	57.7	85.8	84	165.4	200.2	91.8	95	73.7	86.4	83.1	97.7	65.3	97	78.2	78.9	71.3	65.5	91.3	113.7	190.6	241.9	110.4	120.9	100.3	103.5	79.6	91.6	81	71	72.4	79.9	76.8	77.6
High	A2AN08	E3 ubiquitin-protein ligase UBR4 OS=Mus musculus OX=10090 GN=Ubr4 PE=1 SV=1	WFDFPFTR	1xTMTpro [N-Term]	92.5264	14	0.001319	81.9	83.9	83.8	95.3	89	100.4	71.3	89.5	67	78.3	163.5	159.1	376.6	441.4	147.5	145.4	142.5	175	137.7	169.8	137.9	178.5	137.1	161.2	121.3	126.3	212.7	236.4	483.9	553.1	229.6	231.5	95.5	78.7	73.7	79.8	76.2	62.8	62	75.7	69.3	65.4
High	A2AN08	E3 ubiquitin-protein ligase UBR4 OS=Mus musculus OX=10090 GN=Ubr4 PE=1 SV=1	WQAHCLTLHIYR	1xCarbamidomethyl [C5]; 1xTMTpro [N-Term]	53.263	59	8.838e-06	3.9	4.4	7.2	6.6	7	5.3	3.8	8.4	3.1	6	14.4	14	25.4	30.7	10.6	11.3	25.1	22.9	22.4	36.9	23.9	23.2	20.7	32.2	20.3	18.6	42.7	50.9	117.9	143.2	50.7	54.5
High	A2AN08	E3 ubiquitin-protein ligase UBR4 OS=Mus musculus OX=10090 GN=Ubr4 PE=1 SV=1	YDEDHSGDDKVFLDCFCK	2xCarbamidomethyl [C15; C17]; 2xTMTpro [K10; K18]; 1xTMTpro [N-Term]	65.5866	27	8.838e-06																																	212.5	185.2	187.1	194.5	190.9	159.6	129.8	168.6	142.3	136.4
High	A2AN08	E3 ubiquitin-protein ligase UBR4 OS=Mus musculus OX=10090 GN=Ubr4 PE=1 SV=1	YILQLAQEYCGDCK	2xCarbamidomethyl [C10; C13]; 1xTMTpro [K14]; 1xTMTpro [N-Term]	81.2459	70	8.838e-06	101.7	101.8	113.3	122.4	114.4	143.1	98.9	115.2	98.7	92.6	166	159.3	319.1	392.8	163.5	159.6	192.4	212.2	216.7	227.5	212.8	242.7	218.3	234.6	195.4	179.8	225.1	260	391.5	462.3	269.9	300.2	133.3	124.2	104.2	115.7	119.8	92	104.3	114.2	106	97.8
High	A2AN08	E3 ubiquitin-protein ligase UBR4 OS=Mus musculus OX=10090 GN=Ubr4 PE=1 SV=1	YNLDDYR	1xTMTpro [N-Term]	41.2581	15	0.001832																	129.9	162.7	141.2	149.6	130.5	157	129.9	136.5	108.7	132.6	183.3	203.4	356.2	410.8	193.5	196.2	223.6	239.9	191.8	199.9	200.8	174.3	171.6	217.2	220.7	224.8
High	A2AN08	E3 ubiquitin-protein ligase UBR4 OS=Mus musculus OX=10090 GN=Ubr4 PE=1 SV=1	YNLDDYRTPVFIFER	1xTMTpro [N-Term]	78.8031	20	8.838e-06	71.5	93.9	111.2	131.4	85.5	116.5	89.3	93.7	88.8	74.6	103.6	136.5	181.6	264	107.8	129	41.2	42.8	51.9	54.7	34.5	67.7	48	64.5	54.3	35.1	68	78.3	122.6	148.5	67.9	71.1
High	A2ANU3	Synapse differentiation-inducing gene protein 1 OS=Mus musculus OX=10090 GN=Syndig1 PE=1 SV=1	DGLVSVYPAPQYQSHR	1xTMTpro [N-Term]	52.4804	38	8.838e-06																	112.3	119.7	135.8	154.2	159.4	183.6	200.2	189.2	218.4	186.3	194	196.1	165.2	170.2	171.7	178.5	96.8	102	110.6	117	140.1	119.8	152.2	169.9	203.2	203.8
High	A2ANU3	Synapse differentiation-inducing gene protein 1 OS=Mus musculus OX=10090 GN=Syndig1 PE=1 SV=1	FIDLSGDDIK	1xTMTpro [K10]; 1xTMTpro [N-Term]	74.5301	38	8.838e-06	71.2	78.3	114.4	118.9	190.7	182.6	175	205.6	250.6	257.5	160.6	180.3	76.8	97.5	163.7	180.3	83	101.2	122.6	132.2	198.9	210.4	266.1	231.3	342	272.1	154.4	146.6	62.4	67.4	177.5	192.6	106.5	111.1	129.1	143.9	274.7	216	346.6	324.1	538.6	426.5
High	A2ANU3	Synapse differentiation-inducing gene protein 1 OS=Mus musculus OX=10090 GN=Syndig1 PE=1 SV=1	LVASAAPGSLEGGR	1xTMTpro [N-Term]	51.3556	32	8.838e-06	96.7	94.3	168.5	170.5	219.9	209.6	269.3	260.3	375.5	363.5	225.8	193.6	72.7	76.9	212.1	222.3	165.7	200.5	219.7	263.6	349.9	373.9	430.8	393.3	529.7	473.2	255.4	231	87.6	85.1	275	303	92.6	94.1	115	129.7	176	148.5	207.2	196.7	337.8	272.3
High	A2ANU3	Synapse differentiation-inducing gene protein 1 OS=Mus musculus OX=10090 GN=Syndig1 PE=1 SV=1	NFMAESR	1xTMTpro [N-Term]	38.8271	20	0.001344	75.4	75.3	131.4	169.7	233.1	251.4	326.5	326.2	520.7	447.8	364.1	347.5	171	210.3	265.5	266.6
High	A2AP18	1-phosphatidylinositol 4,5-bisphosphate phosphodiesterase eta-2 OS=Mus musculus OX=10090 GN=Plch2 PE=1 SV=2	AHQILQQKPTQYLR	1xTMTpro [K8]; 1xTMTpro [N-Term]	46.6649	11	8.838e-06	164	187	203.4	253.9	183.3	240.1	142.8	182.5	114.2	142.3	104.9	109.6	121.6	166	160.4	171.1	148.4	159.9	153.6	179.6	133.4	167.2	134.5	152	112.3	90.5	80.1	92.1	101.1	121	147.8	150.9	224.2	237.3	198.7	222.7	198	175.6	183.1	192.8	146.5	150.7
High	A2AP18	1-phosphatidylinositol 4,5-bisphosphate phosphodiesterase eta-2 OS=Mus musculus OX=10090 GN=Plch2 PE=1 SV=2	CMSAMQEGTQMVK	1xCarbamidomethyl [C1]; 1xTMTpro [K13]; 1xTMTpro [N-Term]	55.2687	39	8.838e-06																	206.2	201.9	207.9	251.3	168.7	231.3	166.6	198	205.7	151.4	148.7	187.2	118	151.2	180.8	180.4	368.5	439.2	314.4	321.5	306.8	299.8	278.7	340.7	345.4	363.5
High	A2AP18	1-phosphatidylinositol 4,5-bisphosphate phosphodiesterase eta-2 OS=Mus musculus OX=10090 GN=Plch2 PE=1 SV=2	ESLDLVSPSSEEAR	1xTMTpro [N-Term]	51.5026	68	8.838e-06	193.2	225.8	218.2	252.5	169.8	203	134.4	163.4	121.5	149.3	100.9	105.4	103.7	121.6	172.3	162.7
High	A2AP18	1-phosphatidylinositol 4,5-bisphosphate phosphodiesterase eta-2 OS=Mus musculus OX=10090 GN=Plch2 PE=1 SV=2	FLVWDHDPIGR	1xTMTpro [N-Term]	72.2475	49	8.838e-06	209.6	223	211.6	251.1	175.7	210.3	133.4	150.5	98.9	116.7	97.5	97.5	83.7	119.4	154.5	172.5	270.7	315.8	280.9	279.7	231.3	249.3	204.9	222.3	165.6	178.4	152.9	181.6	155.1	186.5	219.1	221.1	327.2	277.6	251	260.6	227.1	191.3	182.3	195.8	180.6	172.3
High	A2AP18	1-phosphatidylinositol 4,5-bisphosphate phosphodiesterase eta-2 OS=Mus musculus OX=10090 GN=Plch2 PE=1 SV=2	FLVWDHDPIGRDFIGQR	1xTMTpro [N-Term]	76.4075	19	8.838e-06	30.4	35.2	50.7	62.2	32.8	41.5	28.2	25.4	25.3	24.1	21.6	24.3	18.5	19.5	29.3	27.9	48.8	39.4	62.7	42.4	36.6	70.5	32.4	45	37.4	24.6	26.2	32	27.3	26.9	43.5	42.3
High	A2AP18	1-phosphatidylinositol 4,5-bisphosphate phosphodiesterase eta-2 OS=Mus musculus OX=10090 GN=Plch2 PE=1 SV=2	FNQHQLSR	1xTMTpro [N-Term]	29.6484	41	3.33e-05	120.5	141	131.3	204.6	114	151.1	92.9	120.6	81.5	95.7	76.3	85.8	85	114.7	114.4	113.6	259.3	252.7	253.8	296.4	219.1	262.6	175.1	209.7	162	145.9	110.1	149.6	136.8	165.1	186.4	187.6	257.1	213.4	184.2	204.8	169.1	151.5	148.6	162.6	142.7	116.7
High	A2AP18	1-phosphatidylinositol 4,5-bisphosphate phosphodiesterase eta-2 OS=Mus musculus OX=10090 GN=Plch2 PE=1 SV=2	FYYLDEHR	1xTMTpro [N-Term]	52.7147	42	0.001069	111.3	112	115.6	151.6	93.6	123.6	76.6	110.3	72.6	83.7	75.7	84.5	73.7	98	103.6	120.9																	159.9	162.1	131.9	153	136.6	117.6	104.7	120.2	97.4	99
High	A2AP18	1-phosphatidylinositol 4,5-bisphosphate phosphodiesterase eta-2 OS=Mus musculus OX=10090 GN=Plch2 PE=1 SV=2	IRDCEDPNDFSVSTLSPSGK	1xCarbamidomethyl [C4]; 1xTMTpro [K20]; 1xTMTpro [N-Term]	58.8708	36	8.838e-06	120.2	133.7	132.7	168.7	115.1	147.8	81.4	109.7	56.7	76.8	57.6	51.9	52.5	70.4	102.7	105.1	105.1	116.6	119.3	106.6	97.8	116.1	85	90.6	68.7	60.6	35.5	44.8	40.6	58.3	90	78.7	140.1	141	133.9	129.8	117	101	90.7	101	68.9	75.5
High	A2AP18	1-phosphatidylinositol 4,5-bisphosphate phosphodiesterase eta-2 OS=Mus musculus OX=10090 GN=Plch2 PE=1 SV=2	ISIDSIQEVSEGR	1xTMTpro [N-Term]	64.0534	53	8.838e-06	148.7	171.5	173.5	209.9	160.9	188.5	112.5	141.6	95.3	112.4	85.6	98.5	82.3	106.6	138.1	148.9	141.3	151.8	150.7	166.1	123	155.2	132.6	145.6	117.9	110.4	97.9	121.8	101.7	104.8	137.8	140.5	375.8	343.2	329.6	330.2	310.6	265.5	245	265.3	213.8	196.4
High	A2AP18	1-phosphatidylinositol 4,5-bisphosphate phosphodiesterase eta-2 OS=Mus musculus OX=10090 GN=Plch2 PE=1 SV=2	LFMSSFSK	1xTMTpro [K8]; 1xTMTpro [N-Term]	75.6063	29	0.0002736	60.2	80.5	72.3	99.2	65.6	74.8	46.2	56.9	33.5	42.3	34.8	32.8	39.6	42.3	59.9	52.3	59	69.4	66.2	69.2	48.9	64	42.4	47.8	41.9	36.5	32.6	38.6	35.8	40.4	46.9	51.5	162.8	146.7	151.1	150	111.4	114.3	83.8	115.8	77.9	82.9
High	A2AP18	1-phosphatidylinositol 4,5-bisphosphate phosphodiesterase eta-2 OS=Mus musculus OX=10090 GN=Plch2 PE=1 SV=2	RTASAPTK	1xTMTpro [K8]; 1xTMTpro [N-Term]	24.0113	1	0.004244	75	106.5	79.3	140.9	71	105.1	44.7	78.7	51	66.1	57.5	74.4	67.4	87.5	76.5	75.1
High	A2AP18	1-phosphatidylinositol 4,5-bisphosphate phosphodiesterase eta-2 OS=Mus musculus OX=10090 GN=Plch2 PE=1 SV=2	SPAGDIFNPEHNR	1xTMTpro [N-Term]	46.3618	77	8.838e-06	114.1	117.5	133.4	172.1	107.3	135.5	88.7	101.9	70.1	84.8	68.4	71.6	55.9	84.6	96.8	115.1	112.6	109.5	122.4	115.2	98.4	119.5	92.7	96.6	80.1	73.3	79.4	89.6	82.8	94.2	101.2	108.3	168.3	139.9	130.9	140.3	132.2	118	94.2	116.4	97.8	94
High	A2AP18	1-phosphatidylinositol 4,5-bisphosphate phosphodiesterase eta-2 OS=Mus musculus OX=10090 GN=Plch2 PE=1 SV=2	TLAFSSIMPGYR	1xTMTpro [N-Term]	75.7299	25	8.838e-06	39.3	50	50.5	53.6	51.9	59.7	47.3	53	37.5	54.2	68.5	63.6	84.3	85.7	57.7	64.2
High	A2AP18	1-phosphatidylinositol 4,5-bisphosphate phosphodiesterase eta-2 OS=Mus musculus OX=10090 GN=Plch2 PE=1 SV=2	TWVTGLR	1xTMTpro [N-Term]	56.0079	8	0.001517																																	260.3	252.2	212.3	224.3	194.6	182.2	164	177.2	163	153.1
High	A2AP18	1-phosphatidylinositol 4,5-bisphosphate phosphodiesterase eta-2 OS=Mus musculus OX=10090 GN=Plch2 PE=1 SV=2	VASVEEGDETLDSPGSQSR	1xTMTpro [N-Term]	44.6889	66	8.838e-06																	80.1	100.6	71.5	78.9	65.1	74	65.9	63.7	58.7	54	65.8	61.4	72.1	82.9	72.1	71.5
High	A2AP18	1-phosphatidylinositol 4,5-bisphosphate phosphodiesterase eta-2 OS=Mus musculus OX=10090 GN=Plch2 PE=1 SV=2	VDMYAWVLQAGCR	1xCarbamidomethyl [C12]; 1xTMTpro [N-Term]	84.2051	56	8.838e-06																	57.2	65.5	59.5	72.1	54.5	62.3	51	63.2	48.5	44	31.8	41.8	35.9	43.4	57	56.7
High	A2AP18	1-phosphatidylinositol 4,5-bisphosphate phosphodiesterase eta-2 OS=Mus musculus OX=10090 GN=Plch2 PE=1 SV=2	VEEDVEAGEDSGVSR	1xTMTpro [N-Term]	39.0569	60	8.838e-06	58	58.9	68.6	95.3	65	74.8	52	56.6	50.6	53.8	62.6	58.1	56.7	63.8	70.9	62.4
High	A2AP18	1-phosphatidylinositol 4,5-bisphosphate phosphodiesterase eta-2 OS=Mus musculus OX=10090 GN=Plch2 PE=1 SV=2	YLMAGISDEDSLAR	1xTMTpro [N-Term]	67.8834	76	8.838e-06																																	154.7	154.7	135.7	146.8	134.6	110.8	116.1	119.3	108	111.6
High	A2APT9	Kelch domain-containing protein 7A OS=Mus musculus OX=10090 GN=Klhdc7a PE=1 SV=3	SRPAPVGQAGR	1xTMTpro [N-Term]	19.668	24	2.785e-05																	134	155.2	113	134.8	121	143.6	120.8	139.4	163.2	164	107.3	120.3	53.5	60.8	114.2	124	207.1	175.5	145.7	154	130	118.3	117.9	134.9	174.9	160
High	A2APT9	Kelch domain-containing protein 7A OS=Mus musculus OX=10090 GN=Klhdc7a PE=1 SV=3	VYDYFVESTSK	1xTMTpro [K11]; 1xTMTpro [N-Term]	72.7224	29	3.865e-05																	91.4	120.6	101.3	110.6	88.6	114.4	111.7	112.8	134.2	128.6	119.3	143.2	102.3	116.5	117	114.4
High	A2APV2	Formin-like protein 2 OS=Mus musculus OX=10090 GN=Fmnl2 PE=1 SV=2	AAAVSLENVLLDVK	1xTMTpro [K14]; 1xTMTpro [N-Term]	95.4072	37	8.838e-06	91.9	100.7	117.9	141.8	140.3	147.8	112.4	140.9	102.9	120	84.5	99.5	88.5	110.5	115.5	131.6	10.1	13.3	11.8	12.3	21	18.7	13.1	16.2	12.2	17.3	8.3	6.9	5.7	6.1	9.2	12.6	161.9	155	141.7	156.6	183.4	137.5	158	168.1	175.3	156.2
High	A2APV2	Formin-like protein 2 OS=Mus musculus OX=10090 GN=Fmnl2 PE=1 SV=2	AHNVPLK	1xTMTpro [K7]; 1xTMTpro [N-Term]	34.224	15	0.001818																																	129.4	116.3	126.8	116.4	143.1	110.1	120.1	135.4	126.9	111.3
High	A2APV2	Formin-like protein 2 OS=Mus musculus OX=10090 GN=Fmnl2 PE=1 SV=2	AHNVPLKLPMPEPGELEER	1xTMTpro [K7]; 1xTMTpro [N-Term]	66.9868	25	8.838e-06	127.4	135.1	178.1	199.2	171.6	201.9	154	163.8	143.3	153.3	104.2	112.4	91.8	102.8	149.7	148.1																	207.1	201	199.1	199	224.4	201.1	216	228.2	217.6	210.4
High	A2APV2	Formin-like protein 2 OS=Mus musculus OX=10090 GN=Fmnl2 PE=1 SV=2	AQGPAIDLSSSK	1xTMTpro [K12]; 1xTMTpro [N-Term]	52.2038	51	8.838e-06	85.8	77.9	102.6	131	120.2	141.9	110.6	139.5	100	101.3	82.5	81.8	62.1	75.7	103.1	114.2																	308.4	277.5	307.8	311.8	357.6	295.9	307.6	351.3	332.5	287.9
High	A2APV2	Formin-like protein 2 OS=Mus musculus OX=10090 GN=Fmnl2 PE=1 SV=2	DANTQVHTLR	1xTMTpro [N-Term]	26.2729	41	2.218e-05	86	103.6	130.3	146	173.2	185.5	148.4	183.9	117.2	129.4	119.6	117.8	104.3	135.8	148.7	138.7
High	A2APV2	Formin-like protein 2 OS=Mus musculus OX=10090 GN=Fmnl2 PE=1 SV=2	DDVHVCIMCLR	2xCarbamidomethyl [C6; C9]; 1xTMTpro [N-Term]	57.6767	19	2.218e-05
High	A2APV2	Formin-like protein 2 OS=Mus musculus OX=10090 GN=Fmnl2 PE=1 SV=2	DGAIEDIITALKK	2xTMTpro [K12; K13]; 1xTMTpro [N-Term]	93.069	13	7.115e-05	9.1	12.5	9	14.1	16.2	11.2	13.6	15.1	10.7	13.6	6.7	7.4	5.1	9.2	11.2	12.9																	27.4	18.7	29.2	32.1	30.3	23.4	26	30.2	25.3	25
High	A2APV2	Formin-like protein 2 OS=Mus musculus OX=10090 GN=Fmnl2 PE=1 SV=2	EFLLHNEGK	1xTMTpro [K9]; 1xTMTpro [N-Term]	51.275	35	8.838e-06																	282.1	330.9	358.3	358.5	453.4	424.2	362.8	370.1	304.3	323.1	156.4	165.2	121.2	136.9	299.9	314.5	461.1	429.3	448	495.7	564.5	439.7	445.5	489.7	453.2	425.7
High	A2APV2	Formin-like protein 2 OS=Mus musculus OX=10090 GN=Fmnl2 PE=1 SV=2	EIYKDANTQVHTLR	1xTMTpro [K4]; 1xTMTpro [N-Term]	43.482	27	8.838e-06																																	217.7	189.6	213.2	233.7	251.5	210.1	248.1	247.5	235	220.7
High	A2APV2	Formin-like protein 2 OS=Mus musculus OX=10090 GN=Fmnl2 PE=1 SV=2	FLPTENEVK	1xTMTpro [K9]; 1xTMTpro [N-Term]	62.9245	42	3.865e-05	247.7	261.4	386.4	427.2	392.8	435.6	354.6	363.8	320.5	345.1	194.4	212.3	143.8	200.5	307.7	310.7	281.8	311.9	359.9	344	382	407.6	355.4	345.5	354.5	257.9	159.8	185.9	133.9	136.6	311.3	321.9	349.3	340.7	344.1	341	444.8	351	417.3	366	367.7	340.7
High	A2APV2	Formin-like protein 2 OS=Mus musculus OX=10090 GN=Fmnl2 PE=1 SV=2	GGHEIILSAFDNFK	1xTMTpro [K14]; 1xTMTpro [N-Term]	75.1674	55	8.838e-06																																	133.3	136.3	132.5	137.3	152.1	124.7	116	136.6	143.6	116
High	A2APV2	Formin-like protein 2 OS=Mus musculus OX=10090 GN=Fmnl2 PE=1 SV=2	GSNLPSPVGNSVSR	1xTMTpro [N-Term]	43.4702	53	8.838e-06	82.8	93.6	114	128.5	112.4	131.7	94.6	125.4	90.4	103.8	101.3	90.7	91	124.6	110.5	114.3	39.5	44.3	55	51.1	54.4	61.2	63.8	51	51.4	36	36.5	36.5	32	33.8	46.3	50.7	62.4	49.1	62.2	60.5	58.5	52.7	58.2	65.9	61.8	66.2
High	A2APV2	Formin-like protein 2 OS=Mus musculus OX=10090 GN=Fmnl2 PE=1 SV=2	GYLDPAVTR	1xTMTpro [N-Term]	47.2495	34	6.035e-05	103.4	102.7	147.5	173.1	154.2	161.2	129.8	151.5	128.8	141.6	59.2	67.4	33.9	57.1	121.5	114.4	50.3	63.4	69.9	76.3	67	82	75.6	73.8	68.5	56	41	40.4	28.2	41.6	52	60
High	A2APV2	Formin-like protein 2 OS=Mus musculus OX=10090 GN=Fmnl2 PE=1 SV=2	IAQDAFDDVVKYFGENPK	2xTMTpro [K11; K18]; 1xTMTpro [N-Term]	96.1717	33	8.838e-06																																	128.4	124.4	119.9	108.2	109	98.4	137.8	147.7	119	123
High	A2APV2	Formin-like protein 2 OS=Mus musculus OX=10090 GN=Fmnl2 PE=1 SV=2	KWELICDQER	1xCarbamidomethyl [C6]; 1xTMTpro [K1]; 1xTMTpro [N-Term]	56.8964	10	0.0006416																																	1168.7	987.7	1106.1	1189.6	1315.7	1050.9	966.4	1140.2	1016.8	941.4
High	A2APV2	Formin-like protein 2 OS=Mus musculus OX=10090 GN=Fmnl2 PE=1 SV=2	LGLDEYLDK	1xTMTpro [K9]; 1xTMTpro [N-Term]	72.5655	22	0.0008459	97.1	113.6	114.1	146.8	125.9	139.3	96.4	113.4	88.7	126.2	82.2	83.9	54.6	72.7	104.2	108	56.4	72.1	69	59	64.7	77.8	64.2	62.4	61.6	65.9	34.7	34.4	28	40.7	58.5	57.7	176.4	174.4	168.3	149.3	158.9	122.7	133.5	131.5	159.4	130
High	A2APV2	Formin-like protein 2 OS=Mus musculus OX=10090 GN=Fmnl2 PE=1 SV=2	LLEQEALMEQQDAK	1xTMTpro [K14]; 1xTMTpro [N-Term]	66.8844	47	8.838e-06	142.5	158	226.2	276.8	250.9	269.2	191.8	236.3	164.1	205.7	141.2	131.7	102.5	143.5	189.1	194.8																	200.2	209.6	208.6	198.1	245.6	194.9	223	239.2	210.5	195.2
High	A2APV2	Formin-like protein 2 OS=Mus musculus OX=10090 GN=Fmnl2 PE=1 SV=2	LQDTENEAMSK	1xTMTpro [K11]; 1xTMTpro [N-Term]	46.917	51	1.703e-05																																	228.8	214.6	227.2	211.8	257.6	210	217.1	255	220.2	209.1
High	A2APV2	Formin-like protein 2 OS=Mus musculus OX=10090 GN=Fmnl2 PE=1 SV=2	LQSLDLLLDTK	1xTMTpro [K11]; 1xTMTpro [N-Term]	93.5607	42	8.838e-06	111.7	111.4	144.1	167.4	177.1	197.1	139.1	171	132.8	150.6	93.5	99.7	69.9	92.3	133.9	152.3	141.9	152.7	181.2	187.2	205.5	221.5	199.5	211.8	187	168.8	71.9	93.5	62.1	68.9	179.6	175.8	157.9	163.4	159.8	175.8	203.7	159	180.7	201	186.7	165.8
High	A2APV2	Formin-like protein 2 OS=Mus musculus OX=10090 GN=Fmnl2 PE=1 SV=2	NLAITLR	1xTMTpro [N-Term]	56.7173	9	0.002011	221.9	218.2	264.2	361.6	302.6	350.1	265	302.8	236.9	246.1	228.9	224.6	186.7	242.5	258.5	239.7	204.4	266	223.6	290.2	238.5	297.5	233	278.2	210	209.3	157.8	182.6	169.9	201	206	226.9
High	A2APV2	Formin-like protein 2 OS=Mus musculus OX=10090 GN=Fmnl2 PE=1 SV=2	QAEEENELR	1xTMTpro [N-Term]	27.0521	38	2.785e-05	186.1	181.1	245.5	281.5	286.1	304.6	250	280	215.7	267.2	129.7	114.6	80.2	102.1	213.3	231.9																	255.6	198.1	254.1	274.1	300.6	231.3	258.7	254.9	271.9	238.8
High	A2APV2	Formin-like protein 2 OS=Mus musculus OX=10090 GN=Fmnl2 PE=1 SV=2	QQQELIAELR	1xTMTpro [N-Term]	55.2161	46	8.838e-06	236	259.9	292.5	356.5	307.5	373.6	285.1	306.4	290	308.6	189.9	204.1	121.9	170.5	269.1	273.3																	327.9	284.3	286.9	272.7	313.6	260.3	288.3	287.8	305.9	242.5
High	A2APV2	Formin-like protein 2 OS=Mus musculus OX=10090 GN=Fmnl2 PE=1 SV=2	RQQQELIAELR	1xTMTpro [N-Term]	44.8442	31	7.513e-05	69.5	73.1	81.6	110	100	108.6	85	88.6	79.5	87	78.8	77.8	68	96.9	93.2	98.1
High	A2APV2	Formin-like protein 2 OS=Mus musculus OX=10090 GN=Fmnl2 PE=1 SV=2	RVQESTQVLR	1xTMTpro [N-Term]	31.4731	46	8.838e-06	142.3	167.5	206.4	232.7	192.6	222.2	179	186.1	193.6	179.2	150.5	150.9	106	122.3	174.3	186.9	214.2	244.2	266.1	257.2	245.8	307.9	222.7	246.3	233	208.4	119.9	145.8	95.8	102.2	208.4	196.7	287.6	266.5	275.2	276.3	282.6	212.3	237.3	225.9	245.8	201.8
High	A2APV2	Formin-like protein 2 OS=Mus musculus OX=10090 GN=Fmnl2 PE=1 SV=2	SADEICK	1xCarbamidomethyl [C6]; 1xTMTpro [K7]; 1xTMTpro [N-Term]	37.7764	31	0.0006133	211.4	221.1	289	335.1	344.3	388.6	295.5	342.7	281.1	290.1	157.1	176.4	107.1	151.3	239.9	266																	211.7	199.9	226.7	221.4	268	207.6	243.6	265.4	253.9	260.1
High	A2APV2	Formin-like protein 2 OS=Mus musculus OX=10090 GN=Fmnl2 PE=1 SV=2	TLPVDFVECLMR	1xCarbamidomethyl [C9]; 1xTMTpro [N-Term]	97.9561	17	0.001344	108.4	115.1	141.9	159	144.7	156.6	124.9	121.1	118	129.8	119.8	114.7	91.8	125.7	142.5	137.7
High	A2APV2	Formin-like protein 2 OS=Mus musculus OX=10090 GN=Fmnl2 PE=1 SV=2	TTPPSVFFPVFVR	1xTMTpro [N-Term]	94.0006	42	2.218e-05	41.5	39.7	48.4	59.8	46.6	53.4	45.8	48.7	43	43	35.5	30.9	21.2	29.4	41.2	38.3	53.3	50.7	57.5	57.8	54.3	69.6	67.1	67.2	54.7	46.3	32.9	34.8	31.5	28.5	60.2	48.6	42.5	50.1	46.5	43.8	54.6	44.3	44.9	53.6	44.5	36.4
High	A2APV2	Formin-like protein 2 OS=Mus musculus OX=10090 GN=Fmnl2 PE=1 SV=2	VHLQYEFTK	1xTMTpro [K9]; 1xTMTpro [N-Term]	58.0391	42	8.838e-06	301.5	315.7	382.3	442	437	488.1	341	402.9	347.5	420.7	250.3	287.1	198.1	251.9	345.8	377.9	277.1	341.7	377.6	393.3	403.3	421.6	367.2	385.3	329.4	347.7	198.3	260	172.2	190.4	328.4	344.1	282.6	252	231.5	266.3	277.1	216.9	237.8	247.7	244.5	227.3
High	A2APV2	Formin-like protein 2 OS=Mus musculus OX=10090 GN=Fmnl2 PE=1 SV=2	VQESTQVLR	1xTMTpro [N-Term]	40.1908	33	4.494e-05																	505.8	593.1	574.7	618.6	586.1	671.4	603.5	611.3	502.5	457	282.4	307.4	258.9	287.1	488.1	522.8	485.9	338.8	421.1	388.4	476.5	338.8	414.6	389.8	443.7	338.2
High	A2APV2	Formin-like protein 2 OS=Mus musculus OX=10090 GN=Fmnl2 PE=1 SV=2	VTLLEANR	1xTMTpro [N-Term]	53.8026	22	6.573e-05	318.8	319.7	487.9	524	550.8	588.2	468.7	514	398.9	455	200.8	230.7	130.5	159	363.4	349.4	82.3	95.6	90.8	86.1	108.5	122.6	107.9	97.5	91.3	86.2	45.1	51.9	37.8	42.7	81.5	81.6	238.8	213.1	228.3	232	300.7	229.6	269.4	271.2	265.1	224.4
High	A2APX8	Sodium channel protein type 1 subunit alpha OS=Mus musculus OX=10090 GN=Scn1a PE=1 SV=1	CCQISVEEGR	2xCarbamidomethyl [C1; C2]; 1xTMTpro [N-Term]	31.8198	39	8.838e-06																																	67.2	98.3	62.1	76.4	54.1	74.5	43.4	55.4	43.7	46.8
High	A2APX8	Sodium channel protein type 1 subunit alpha OS=Mus musculus OX=10090 GN=Scn1a PE=1 SV=1	ESLAAIER	1xTMTpro [N-Term]	40.0152	29	0.0001568																	84.4	89.4	103.7	95	92.8	92.7	88.3	78.3	57.8	59.5	30.3	44.2	33.3	30.1	70.4	78.1	222.6	269.9	195	273.5	221.6	200.6	140.9	178.5	156.7	142.4
High	A2APX8	Sodium channel protein type 1 subunit alpha OS=Mus musculus OX=10090 GN=Scn1a PE=1 SV=1	IATDCKLPR	1xCarbamidomethyl [C5]; 1xTMTpro [K6]; 1xTMTpro [N-Term]	45.7711	5	0.0001938	177.3	216.1	289.6	381.7	230.4	324.3	212.2	224.9	216.1	183.5	107.2	130.4	64.7	88	181.6	179.9
High	A2APX8	Sodium channel protein type 1 subunit alpha OS=Mus musculus OX=10090 GN=Scn1a PE=1 SV=1	ILDEIKPLDDLNNR	1xTMTpro [K6]; 1xTMTpro [N-Term]	78.2377	31	8.838e-06	339.3	369	403.1	496.3	397	454.1	278.1	392	284.7	353.9	166.7	186.7	104.2	107	293.3	307.1
High	A2APX8	Sodium channel protein type 1 subunit alpha OS=Mus musculus OX=10090 GN=Scn1a PE=1 SV=1	INENSITEK	1xTMTpro [K9]; 1xTMTpro [N-Term]	47.5579	24	0.0003212																																	329.2	371.3	318.9	435.3	324.9	366.8	259.1	323.1	280.2	285.2
High	A2APX8	Sodium channel protein type 1 subunit alpha OS=Mus musculus OX=10090 GN=Scn1a PE=1 SV=1	IYEFIQQSFVK	1xTMTpro [K11]; 1xTMTpro [N-Term]	93.9932	33	9.049e-05	84.3	106.6	98.7	116.5	100	113.9	66.5	87.2	66	78.5	66.5	61.4	38.2	48.9	76.5	90.2
High	A2APX8	Sodium channel protein type 1 subunit alpha OS=Mus musculus OX=10090 GN=Scn1a PE=1 SV=1	KIYEFIQQSFVK	2xTMTpro [K1; K12]; 1xTMTpro [N-Term]	87.1084	22	2.218e-05	58.9	84.2	78.3	90.2	68.7	87.1	46.4	56.6	45.9	53	26.4	35.7	15.7	17.2	53.5	60.9
High	A2APX8	Sodium channel protein type 1 subunit alpha OS=Mus musculus OX=10090 GN=Scn1a PE=1 SV=1	KQEEVSAVIIQR	1xTMTpro [K1]; 1xTMTpro [N-Term]	50.4903	12	8.838e-06	364.7	422.5	498.7	564.5	485.5	555.4	354.2	447.9	336.3	384	210.3	203.4	94	120.4	355.5	372.1
High	A2APX8	Sodium channel protein type 1 subunit alpha OS=Mus musculus OX=10090 GN=Scn1a PE=1 SV=1	MLAVFPANGK	1xDeamidated [N8]; 1xTMTpro [K10]; 1xTMTpro [N-Term]	73.5675	37	5.039e-05	183.4	220.4	241.5	290.3	236.7	278.8	191.9	237.2	177.5	207.3	113.2	124.1	71	97.7	193.5	191.6	106.6	107.5	127.6	103.7	110.9	114.4	95.8	91	81.2	74.5	46.4	48	32.4	31.9	89.8	94.4
High	A2APX8	Sodium channel protein type 1 subunit alpha OS=Mus musculus OX=10090 GN=Scn1a PE=1 SV=1	NSNLSQTSR	1xTMTpro [N-Term]	19.7815	33	2.785e-05	308.5	359.6	365.8	659.4	305.8	460.3	278.9	345.2	264.7	268	97.1	102.8	47.3	50.6	246.5	250.1	339.5	275.5	316.9	391.4	291.3	330.1	256	264.6	227	193	79.6	67.1	39.6	37.9	218.3	216.5	387.1	366	316	449.1	287.8	310.1	244.6	289.1	247.1	170.4
High	A2APX8	Sodium channel protein type 1 subunit alpha OS=Mus musculus OX=10090 GN=Scn1a PE=1 SV=1	QASFTYNK	1xTMTpro [K8]; 1xTMTpro [N-Term]	45.4016	28	4.494e-05	122.9	164.2	168.6	236.7	183.5	228.2	135.3	205.1	141.9	172.8	118	139.7	88.5	132.5	143.6	159	199.9	202.1	214.3	205.1	201.4	227.1	208.7	190.9	181	165.9	110.1	109.6	77.3	80.3	184.2	188.8
High	A2APX8	Sodium channel protein type 1 subunit alpha OS=Mus musculus OX=10090 GN=Scn1a PE=1 SV=1	RDSLFVPR	1xTMTpro [N-Term]	43.5309	33	0.0001568																																	132.9	126.7	128.5	166.5	125.8	114.2	100.7	118.5	111.9	104.7
High	A2APX8	Sodium channel protein type 1 subunit alpha OS=Mus musculus OX=10090 GN=Scn1a PE=1 SV=1	RNSNLSQTSR	1xDeamidated [N2]; 1xTMTpro [N-Term]	17.9033	30	0.001081	12.4	13.3	13.7	16.8	12.9	15.8	10.2	12.7	7.9	13	6.6	6.9	2.4	4	6.8	9
High	A2APX8	Sodium channel protein type 1 subunit alpha OS=Mus musculus OX=10090 GN=Scn1a PE=1 SV=1	TDLTMSTAACPPSYDR	1xCarbamidomethyl [C10]; 1xTMTpro [N-Term]	49.7953	48	8.838e-06																	65.2	75.9	66.1	76.6	72.2	71.1	74.7	66.3	61.8	61.6	45.5	51.5	44.5	43.7	63.5	67.2
High	A2APX8	Sodium channel protein type 1 subunit alpha OS=Mus musculus OX=10090 GN=Scn1a PE=1 SV=1	VSYQPITTTLK	1xDeamidated [Q4]; 1xTMTpro [K11]; 1xTMTpro [N-Term]	65.6152	33	2.218e-05	139.9	176.1	174.9	202.4	168.2	181.4	107.2	132	90	98.7	45.2	51.2	29.1	40.8	115.7	120.4	293.6	301.3	334.3	335.2	323.2	327.5	265.5	253.1	198.1	209.5	108.3	122.3	82.3	98.6	263.1	243.7	544.1	590.3	505.5	546.3	449.3	403.6	300.1	366.7	278	265.3
High	A2APY7	Arginine-hydroxylase NDUFAF5, mitochondrial OS=Mus musculus OX=10090 GN=Ndufaf5 PE=1 SV=1	ALNIFDR	1xTMTpro [N-Term]	64.4245	14	0.0008881																																	197.8	217	87.8	92.8	37.5	33.9	17.4	27.8	14.5	15.9
High	A2APY7	Arginine-hydroxylase NDUFAF5, mitochondrial OS=Mus musculus OX=10090 GN=Ndufaf5 PE=1 SV=1	DFPLALDIGCGR	1xCarbamidomethyl [C10]; 1xTMTpro [N-Term]	79.4873	40	3.33e-05																																	68.4	59.6	36.7	39.4	34.1	26.2	27.1	26.9	32.5	26.3
High	A2APY7	Arginine-hydroxylase NDUFAF5, mitochondrial OS=Mus musculus OX=10090 GN=Ndufaf5 PE=1 SV=1	DTMLAAAAVYR	1xTMTpro [N-Term]	59.8894	46	8.838e-06																	197.5	380.3	113.4	155	39	39	15.7	14	3.9	4	4.5	5.9	10.2	9.9	62.1	58.8
High	A2APY7	Arginine-hydroxylase NDUFAF5, mitochondrial OS=Mus musculus OX=10090 GN=Ndufaf5 PE=1 SV=1	GYIAQHLDKETVGK	2xTMTpro [K9; K14]; 1xTMTpro [N-Term]	51.4855	10	8.838e-06	296.8	317	233.3	282.6	159.1	178.2	119.5	113.8	101.3	101.8	131	117.6	121	137.7	183.1	204.1
High	A2APY7	Arginine-hydroxylase NDUFAF5, mitochondrial OS=Mus musculus OX=10090 GN=Ndufaf5 PE=1 SV=1	IFQTDIAEHALK	1xTMTpro [K12]; 1xTMTpro [N-Term]	68.3775	32	8.838e-06																	311.8	594.3	256.5	340	176	198.4	145.8	157.3	126	119	109.8	136.9	119.7	134.1	197.2	212.1
High	A2AQ19	RNA polymerase-associated protein RTF1 homolog OS=Mus musculus OX=10090 GN=Rtf1 PE=1 SV=1	ALAITSK	1xTMTpro [K7]; 1xTMTpro [N-Term]	51.8364	34	7.513e-05	27	34.2	54.6	68.3	99.7	105.2	87.4	123.9	59.3	72.4	51.3	61.4	69.9	83.9	62.1	74.3	16.6	25.7	34.3	35.7	38.5	58.4	79	70.7	51.5	39.2	38.5	31	44.6	34.6	47.7	48.4	39	57.1	68.5	71.2	111.7	118.7	123.2	164.4	98.5	123.5
High	A2AQ19	RNA polymerase-associated protein RTF1 homolog OS=Mus musculus OX=10090 GN=Rtf1 PE=1 SV=1	QIQDQLNELEERAEALDR	1xTMTpro [N-Term]	76.204	23	3.33e-05																	14.5	13.3	26	20.9	27.3	34.1	45	43.5	28.1	20.1	23.6	21	30.6	32.9	28.6	32
High	A2AQ19	RNA polymerase-associated protein RTF1 homolog OS=Mus musculus OX=10090 GN=Rtf1 PE=1 SV=1	WCHMPFFAK	1xCarbamidomethyl [C2]; 1xTMTpro [K9]; 1xTMTpro [N-Term]	73.3327	23	0.001865																	84.2	125.2	84.4	84.3	79.1	110.2	104.1	106.7	75.6	71.6	65.4	68.8	79.9	82.6	86.2	88.1
High	A2AQ25	Sickle tail protein OS=Mus musculus OX=10090 GN=Skt PE=1 SV=1	AELEISNK	1xTMTpro [K8]; 1xTMTpro [N-Term]	50.4005	35	7.115e-05																																	364	352	259.2	290.3	198.2	188.5	160.5	157.4	157.2	173.9
High	A2AQ25	Sickle tail protein OS=Mus musculus OX=10090 GN=Skt PE=1 SV=1	AGGDCKPTSPSLPASK	1xCarbamidomethyl [C5]; 2xTMTpro [K6; K16]; 1xTMTpro [N-Term]	46.143	35	8.838e-06																																	149.6	121.9	119.3	123.7	89	82.2	64.2	70.3	64.8	72
High	A2AQ25	Sickle tail protein OS=Mus musculus OX=10090 GN=Skt PE=1 SV=1	ALFVSAFPQQLTMK	1xTMTpro [K14]; 1xTMTpro [N-Term]	91.9456	41	8.838e-06	77.6	86.2	75.9	99.6	54.3	71.3	43.1	54.4	39.3	46.5	85.1	72	84.3	80	70.3	71.6	76.6	87.6	65.6	80.6	51.9	72.6	43	57.8	44.7	44.1	57.1	75.9	60.6	63.5	66.9	66.8
High	A2AQ25	Sickle tail protein OS=Mus musculus OX=10090 GN=Skt PE=1 SV=1	AQNGSSSK	1xDeamidated [N3]; 1xTMTpro [K8]; 1xTMTpro [N-Term]	22.1433	31	2.785e-05	117.3	121.6	115.8	145.6	95.4	92.3	52.3	68.1	41.8	48.2	83.8	68.5	82.8	75.5	89.2	83.9
High	A2AQ25	Sickle tail protein OS=Mus musculus OX=10090 GN=Skt PE=1 SV=1	ASLPVVR	1xTMTpro [N-Term]	47.5702	21	0.001865	188.1	211.2	198.5	219.9	133.1	143.9	97.5	116.8	103.8	110.1	154.1	141	152.6	136.9	146.1	165.6	129.1	137.3	116.6	120.3	94.5	112.1	98.5	107.8	93.2	88	121	143.5	167.4	179.8	127.4	120.4	508.7	488.5	401.3	373.4	307.6	241.7	214.5	232.5	243.4	217.9
High	A2AQ25	Sickle tail protein OS=Mus musculus OX=10090 GN=Skt PE=1 SV=1	ATAAEVLK	1xTMTpro [K8]; 1xTMTpro [N-Term]	51.5702	42	3.33e-05	105.6	120.3	113.1	143.6	94.7	114.4	52.4	80.5	48.5	77.6	106.8	77.8	110.3	102.3	93	108.4	299	375	275.2	326.2	249.6	272	213.1	210.6	178.6	184.1	209.2	255	213.9	229.1	256.6	285.5
High	A2AQ25	Sickle tail protein OS=Mus musculus OX=10090 GN=Skt PE=1 SV=1	ATPSTAK	1xTMTpro [K7]; 1xTMTpro [N-Term]	29.7525	27	0.001359	229.1	210.8	222.4	221.4	176.8	161.6	102.4	141.6	66.7	103	166.9	117.5	166.3	144	170.1	175.8	206.5	284.2	152.4	217.3	168.3	192.3	132.8	148.3	104.9	108.8	110.9	141.2	110.2	138.7	165.1	148.6	193.4	147.3	134.3	145.3	126.5	96.6	70.7	104.5	74.8	81.5
High	A2AQ25	Sickle tail protein OS=Mus musculus OX=10090 GN=Skt PE=1 SV=1	AVNGDMR	1xDeamidated [N3]; 1xTMTpro [N-Term]	26.5028	25	0.001125	148.5	159.7	161.8	173.7	114.4	136.7	91.4	103.4	88.9	91.9	95.8	98	76.9	91.6	118.1	116.9
High	A2AQ25	Sickle tail protein OS=Mus musculus OX=10090 GN=Skt PE=1 SV=1	DRLSSLPVSR	1xTMTpro [N-Term]	39.7497	34	2.218e-05	30.7	35.7	34.1	41.2	20.1	23.9	10.9	12	15.3	11.4	25.7	26.5	21	24.7	18.9	18.4	51.7	45.1	38.6	34.9	38.4	35.7	24	28.1	23.6	18.7	27.9	39.1	29.8	32.7	29.1	37.5	96.4	109.8	58.9	55.3	40.7	33.2	29	33.8	28.9	34.2
High	A2AQ25	Sickle tail protein OS=Mus musculus OX=10090 GN=Skt PE=1 SV=1	DVEDGAFLLR	1xTMTpro [N-Term]	64.9831	39	2.785e-05	570.5	565.5	495.9	636.1	400.5	424.1	258.2	332.6	241	299.9	431.2	384.5	401.1	407.2	406.6	456.9	478.1	583.4	458.4	553.6	392.6	492.1	362.6	381.9	313.9	367.4	338.1	431.7	353.4	413.1	428.4	472.1	452.3	390.9	342.6	361.6	262.3	219.2	160.7	185.6	177	184.3
High	A2AQ25	Sickle tail protein OS=Mus musculus OX=10090 GN=Skt PE=1 SV=1	FQSPPHAGK	1xTMTpro [K9]; 1xTMTpro [N-Term]	36.5505	22	3.865e-05																	155.6	206.7	135.5	195.9	128.4	150.1	106.7	111	91.1	86.7	123	147.5	114.2	146.7	122.6	125.7
High	A2AQ25	Sickle tail protein OS=Mus musculus OX=10090 GN=Skt PE=1 SV=1	GEFPTLQNK	1xTMTpro [K9]; 1xTMTpro [N-Term]	56.3938	29	2.218e-05																	362.5	439.6	333.2	394.7	253.5	311	207.9	235.7	198.4	212.1	249	290.7	232.7	254.2	290.7	288.7
High	A2AQ25	Sickle tail protein OS=Mus musculus OX=10090 GN=Skt PE=1 SV=1	GPITSSSK	1xTMTpro [K8]; 1xTMTpro [N-Term]	36.3017	22	0.0007854	105.6	121.3	120.5	141.6	88.8	112.1	68.1	74.6	63	71.9	102.7	91.6	86.1	89.3	109.3	106.1																	237.3	207.6	203.1	190.4	182.1	154.6	134.2	170.8	142.3	145
High	A2AQ25	Sickle tail protein OS=Mus musculus OX=10090 GN=Skt PE=1 SV=1	IEVEAVR	1xTMTpro [N-Term]	41.2216	25	0.0003566	87.1	92.7	84.2	107.1	66	86.5	50.7	56.3	48.8	49.3	77.5	71.3	67.9	64.9	67.4	78	90.3	80.4	67.6	83.2	50.6	66.9	44.8	48.1	45.3	35.5	50.7	59.6	54.6	46.5	54.5	57	105.7	99.7	76.3	80.2	58.5	50.1	50	59	48.1	45.8
High	A2AQ25	Sickle tail protein OS=Mus musculus OX=10090 GN=Skt PE=1 SV=1	IPALSPSSGK	1xTMTpro [K10]; 1xTMTpro [N-Term]	56.3105	28	3.865e-05																																	189.6	145.9	141	142.7	117.8	98.2	94.2	97.4	96.3	94.5
High	A2AQ25	Sickle tail protein OS=Mus musculus OX=10090 GN=Skt PE=1 SV=1	IPYGGSRPMAIPGNATIPR	1xTMTpro [N-Term]	60.4808	4	8.838e-06	349.1	451.6	365.5	442.4	276.9	354.4	203	247.9	181.4	219	249.7	236.6	226.8	234	290.2	333.1	473.8	638.6	326.4	346.2	206.6	264.7	209.8	205.2	166.4	158.3	189.7	214	187.2	192.6	276	285.5	426.3	447.9	310.7	303.7	258.8	219	219.5	244.1	221.8	207.3
High	A2AQ25	Sickle tail protein OS=Mus musculus OX=10090 GN=Skt PE=1 SV=1	KAELEISNK	2xTMTpro [K1; K9]; 1xTMTpro [N-Term]	49.6204	13	0.0001612	289.1	320.8	307.9	420.4	249.7	326.4	188.6	248.2	173.4	215.7	301.8	314.5	278	338.2	298.1	321.3
High	A2AQ25	Sickle tail protein OS=Mus musculus OX=10090 GN=Skt PE=1 SV=1	LEDPVQR	1xTMTpro [N-Term]	38.254	14	0.001782	349.1	352.5	322.4	381.7	173.3	252.4	145.6	159.8	139.8	162.7	269.6	249.7	227.7	214.6	243.5	275.8	458.6	487.5	393.1	431	253.4	317.8	194.9	222.8	208.9	205	282.5	330.6	256.4	271.8	283.7	318.7	330.9	331.6	268.3	269.8	204.3	169.2	142.7	164.3	148.7	158.8
High	A2AQ25	Sickle tail protein OS=Mus musculus OX=10090 GN=Skt PE=1 SV=1	LLEEAQANIMK	1xTMTpro [K11]; 1xTMTpro [N-Term]	74.1858	34	2.218e-05																	109.4	122.5	97.4	109.7	84.6	102.6	80	83.2	77.2	64	95.7	113.6	88.4	100.8	102.9	102
High	A2AQ25	Sickle tail protein OS=Mus musculus OX=10090 GN=Skt PE=1 SV=1	LQLQQMR	1xTMTpro [N-Term]	47.4783	9	0.002819	598.6	686.1	618.5	773.8	460.3	563.2	322.8	404.8	288.4	349.2	444.6	427.9	391	438.2	492.6	529.9																	731	700.2	546.6	513.7	478.4	388.8	341.1	396.6	368.4	345.7
High	A2AQ25	Sickle tail protein OS=Mus musculus OX=10090 GN=Skt PE=1 SV=1	LSSLPVSR	1xTMTpro [N-Term]	51.149	14	0.0008459	757.5	784.6	717.3	905.1	527.2	624.1	387.1	470.2	374.4	376.6	550.2	456.9	511.6	525.4	558	560.8	505.9	561.6	456.8	484.4	339	393.3	248.9	285.8	234.9	226.5	299.5	329	279.5	312	331.9	345.8	626	489.2	414	448.3	311.9	274.7	224.6	242.2	216.7	234.1
High	A2AQ25	Sickle tail protein OS=Mus musculus OX=10090 GN=Skt PE=1 SV=1	MLESPSVAIYIK	1xTMTpro [K12]; 1xTMTpro [N-Term]	80.0606	29	8.838e-06																	102.4	129.2	106.4	108.5	85.7	103.5	87.9	94.2	102.2	101.7	94.2	115.1	77.1	89.1	99.4	116.7
High	A2AQ25	Sickle tail protein OS=Mus musculus OX=10090 GN=Skt PE=1 SV=1	MPNEVTSTDTIR	1xTMTpro [N-Term]	44.0386	52	2.218e-05	160.7	168	172.9	206.6	105.7	131.7	77.8	78.9	71.5	76.9	130.1	118.9	118.1	103.8	124.8	131.7	184.8	217.3	186.7	182.2	136.3	135.4	93.9	110.9	84.9	84.4	116.3	136.8	103.9	109.1	136.3	149	204.1	194.4	151.3	146.4	112.5	93.7	73.4	89.1	75.5	84.5
High	A2AQ25	Sickle tail protein OS=Mus musculus OX=10090 GN=Skt PE=1 SV=1	MPVPMTSK	1xTMTpro [K8]; 1xTMTpro [N-Term]	55.8073	27	0.001205	231.6	260	256.5	303.9	180.3	218.2	127.9	156.6	133.9	147.3	211.3	191.7	184.7	190.7	196.6	205.9	243.7	287	237.5	261.9	186.9	230	161.8	184.7	162.3	148.8	169.4	194.9	158.2	170.7	210.4	206.4	215.6	191.1	161.6	159.6	137.9	118.6	121.9	111.1	115.7	124.9
High	A2AQ25	Sickle tail protein OS=Mus musculus OX=10090 GN=Skt PE=1 SV=1	NEGFYADPYLYHEGR	1xTMTpro [N-Term]	54.5347	53	8.838e-06	194.8	209.8	178.7	279.4	141.7	180.9	120.7	146.8	125.6	118.2	171.5	139.6	143.5	160.1	167.9	182.6	165.4	180.7	161.9	191.9	149.2	177.5	135.9	159.6	137.2	123.5	117	137.5	121.2	139.3	147.6	150.7	159.5	176.9	122	125.2	113.2	105.1	103.8	136.8	108.2	105.8
High	A2AQ25	Sickle tail protein OS=Mus musculus OX=10090 GN=Skt PE=1 SV=1	NTSGLSSLVDLGPPLVEK	1xTMTpro [K18]; 1xTMTpro [N-Term]	89.4543	72	8.838e-06	51.4	57.6	51.7	67.3	44.4	53.7	18.9	33.1	30.1	26.7	41.4	38.7	36.5	42.7	45.6	46.1	99.4	118.2	85.2	99.6	54.9	77.7	57.4	65.7	49.2	44.1	54.1	54.4	52.2	59	68.1	79.6	105.9	95.1	66.6	85.4	58.9	52.2	40.7	56.2	50.6	48.1
High	A2AQ25	Sickle tail protein OS=Mus musculus OX=10090 GN=Skt PE=1 SV=1	QANGSAK	1xDeamidated [N3]; 1xTMTpro [K7]; 1xTMTpro [N-Term]	23.3176	24	0.0003432	211.2	208.3	195.8	250.2	133.2	173.3	101.6	141.9	95.8	118.7	208.6	205	218.6	221.7	187.4	189.3	138.8	167	119.7	156.6	103.7	115.2	84.1	86.5	79.9	79.2	98.3	125.4	88.4	108.1	118.4	118.2
High	A2AQ25	Sickle tail protein OS=Mus musculus OX=10090 GN=Skt PE=1 SV=1	QLQLQNQEILR	1xTMTpro [N-Term]	56.6177	34	8.838e-06																	336.4	342.4	303.6	318.4	237.7	295.3	186.3	231.7	191.8	185.3	251.7	329	250.8	318.4	274.7	298	331.7	337.3	249.6	250.9	189.7	178.8	168.2	202.6	183.7	177.5
High	A2AQ25	Sickle tail protein OS=Mus musculus OX=10090 GN=Skt PE=1 SV=1	QNLEHYNGKEFEK	1xDeamidated [N7]; 2xTMTpro [K9; K13]; 1xTMTpro [N-Term]	46.9353	13	7.513e-05																	183	236	189.3	235.7	158.4	179.7	162.9	165.7	148.8	133.7	133.7	147.9	147	150.8	171.8	182.7
High	A2AQ25	Sickle tail protein OS=Mus musculus OX=10090 GN=Skt PE=1 SV=1	QVGEAVATLKGEFPTLQNK	2xTMTpro [K10; K19]; 1xTMTpro [N-Term]	80.1637	36	8.838e-06	98.3	118.1	135.1	164.1	88.2	125.9	73.6	82.9	71	83.8	94.5	94.7	92.5	109.5	98.4	95.8
High	A2AQ25	Sickle tail protein OS=Mus musculus OX=10090 GN=Skt PE=1 SV=1	RHTLGGPR	1xTMTpro [N-Term]	16.8118	24	0.002816	16	11.8	14.8	17.8	10.3	12.2	5.6	6.6	7.3	6.9	13.9	6.2	7.3	8.6	13.4	9	39.2	23.1	34.8	21	20.2	18.3	14.7	8.5	19.1	10	19	15.1	16.5	11.1	19.3	24	41.6	24.7	26.8	22.2	18.8	14.2	14	10	18.7	11.1
High	A2AQ25	Sickle tail protein OS=Mus musculus OX=10090 GN=Skt PE=1 SV=1	RLEDPVQR	1xTMTpro [N-Term]	29.7459	21	0.0008609	255.8	315.8	288	355.2	176	228	133.1	146.5	114.8	134.1	226.1	209.7	180.6	204.8	220.4	217.7	319.6	329.5	290.9	296.4	206.7	242.6	144.2	175.8	142	147.8	185.3	229.5	177.1	190.5	225.2	243.5	430.9	402.4	300.7	275.6	239.6	184.8	131.3	172.2	156.2	167.4
High	A2AQ25	Sickle tail protein OS=Mus musculus OX=10090 GN=Skt PE=1 SV=1	SGDVVYTGR	1xTMTpro [N-Term]	30.0441	43	7.513e-05	925.4	1039.6	898.8	1220.6	574.6	750.1	379	527.1	407.2	451.7	825.9	684.7	746.8	738.2	732.8	700.4	330.1	323.7	267.7	291.1	181.3	232.8	148.3	171.8	131	125.2	199.4	220.4	191.9	222.4	216.9	217.4	538.7	468.8	358.9	379.9	258.8	227.6	186.7	201.9	190.9	202.3
High	A2AQ25	Sickle tail protein OS=Mus musculus OX=10090 GN=Skt PE=1 SV=1	SISPSPSAILER	1xTMTpro [N-Term]	58.1989	32	8.838e-06	395.8	408	370.3	496.2	278.8	333.2	207.4	257.3	242.4	238.4	364.6	328.1	324.2	330.4	329.7	355.4	504	557.9	469.8	484.7	346.2	397.6	317.8	314	286.6	283.1	347.7	413.5	351.8	364.9	408.2	431.2	531.8	476.7	368.7	392.9	294.9	258.6	227.6	246.1	250.6	263.7
High	A2AQ25	Sickle tail protein OS=Mus musculus OX=10090 GN=Skt PE=1 SV=1	SSSLPSASGDSSNLPNAPATKPSIASTPLSPQAGR	1xTMTpro [K21]; 1xTMTpro [N-Term]	60.1842	55	8.838e-06																	57.3	65.3	62.8	64.9	42.8	62.4	42	46	38.4	37.3	42.7	56	38	44.6	46.1	51.5
High	A2AQ25	Sickle tail protein OS=Mus musculus OX=10090 GN=Skt PE=1 SV=1	TLVEQER	1xTMTpro [N-Term]	30.2428	19	0.0005504	463.6	503	410.1	534.5	274.4	326.4	170.1	216.7	174.8	190.9	324.6	266.4	307.3	268.4	336.2	327.3	784	845.2	669.3	709.7	458.9	585.4	367.7	406.5	328	331.5	440.6	498	416.9	458.9	517.1	537.4	742.5	700.1	506.3	507.5	378.3	325.3	264.5	299.8	266	286
High	A2AQ25	Sickle tail protein OS=Mus musculus OX=10090 GN=Skt PE=1 SV=1	VSSEDPGPTPQTR	1xTMTpro [N-Term]	28.2303	45	8.838e-06	65.7	76.5	81.5	83.9	57.6	62	34.7	53.5	34.2	46.2	69	71.8	76.2	72.2	61.3	68.1	49.5	46.2	48.6	43.5	36.6	43.5	32.7	32.8	31.2	35.8	42.9	50	39.9	46.9	39.3	45.5	144.1	130.1	101.3	104.8	73.2	72.8	65	79.4	74	63.2
High	A2AQ25	Sickle tail protein OS=Mus musculus OX=10090 GN=Skt PE=1 SV=1	VVTLKDVEDGAFLLR	1xTMTpro [K5]; 1xTMTpro [N-Term]	86.2308	21	8.838e-06																	629.1	576.7	702.8	568.2	319.1	537	338.9	415.9	347.5	290.2	450.2	486.5	384.7	407.8	492.5	499.6	700.7	920.9	553.3	514.7	363.5	335.3	333	369.2	286.6	335.3
High	A2AR02	Peptidyl-prolyl cis-trans isomerase G OS=Mus musculus OX=10090 GN=Ppig PE=1 SV=1	CFFDIAINNQPAGR	1xCarbamidomethyl [C1]; 1xTMTpro [N-Term]	71.947	51	8.838e-06	32.4	32.4	35.9	41.6	33.5	34.1	30.6	32.7	33.9	36.3	60.6	58.9	52.7	79.1	47.6	54.1	51	61.4	63.6	61.5	56.6	68.1	80.4	77.7	93.5	73.4	101.3	103.3	110.3	111.1	88.9	80.8	58.1	57.6	57.8	57.5	55.2	55.2	59.3	60.1	67.2	56.8
High	A2AR02	Peptidyl-prolyl cis-trans isomerase G OS=Mus musculus OX=10090 GN=Ppig PE=1 SV=1	DFMVQGGDFSEGNGR	1xOxidation [M3]; 1xTMTpro [N-Term]	40.5033	1	0.005286																																	11.8	5.7	4.3	9.1	7.9	6.6	8.2	5.9	10	10
High	A2AR02	Peptidyl-prolyl cis-trans isomerase G OS=Mus musculus OX=10090 GN=Ppig PE=1 SV=1	ECNPPNSQPASYQR	1xCarbamidomethyl [C2]; 1xTMTpro [N-Term]	25.5683	52	8.838e-06																	22.8	40.7	19.6	34.4	39.8	51.6	49.2	60	71.1	62	121.5	126.8	126.3	130	81.9	75.5
High	A2AR02	Peptidyl-prolyl cis-trans isomerase G OS=Mus musculus OX=10090 GN=Ppig PE=1 SV=1	EFLLSMANR	1xTMTpro [N-Term]	69.049	22	6.035e-05	101.7	113.2	144.2	182.8	185.2	224.3	176.5	218	248	280.6	560.2	573.8	585.9	732.1	301.9	316.2	80.8	90.1	91.6	100.4	116.6	116.9	143.5	139.2	187.1	172.7	385.5	380.8	418	439.2	219.4	212.9	155.3	142.3	132.1	149.3	188.7	158.7	181.3	226.4	274.9	267.5
High	A2AR02	Peptidyl-prolyl cis-trans isomerase G OS=Mus musculus OX=10090 GN=Ppig PE=1 SV=1	ERECNPPNSQPASYQR	1xCarbamidomethyl [C4]; 1xTMTpro [N-Term]	22.932	49	8.838e-06	11.1	5.9	12.3	7.6	9.2	12	11.5	16.2	18.5	21	65.4	70.9	69.7	85.5	25.3	29.9	13.2	11.4	12.4	11	13.7	16.5	21	22.4	30.2	19.3	65.8	62.6	79.8	77.1	34.2	40.4	16	10.2	9.8	17.1	17.2	13.8	18.9	23.4	50.5	38.1
High	A2AR02	Peptidyl-prolyl cis-trans isomerase G OS=Mus musculus OX=10090 GN=Ppig PE=1 SV=1	ERERECNPPNSQPASYQR	1xCarbamidomethyl [C6]; 1xTMTpro [N-Term]	20.9767	14	8.838e-06	6	4.1	9.7	8	7.5	10.6	8.1	4.4	13.6	8.8	18.8	25.2	14.8	33.2	11.7	11.7
High	A2AR02	Peptidyl-prolyl cis-trans isomerase G OS=Mus musculus OX=10090 GN=Ppig PE=1 SV=1	HNKEFLLSMANR	1xTMTpro [K3]; 1xTMTpro [N-Term]	51.6841	17	8.838e-06	16.5	17.7	28.7	35.5	39	46.9	53.2	48.6	69.8	57.2	128.8	130.5	128.5	197.9	75.1	70.9	10.7	11.2	19.9	22.8	25.9	33.4	45.9	43.7	73.5	52.6	155.3	148.9	180	173.7	81	81.1	10.6	9.3	12	8.8	15	13.1	17.1	20	29.7	24.3
High	A2AR02	Peptidyl-prolyl cis-trans isomerase G OS=Mus musculus OX=10090 GN=Ppig PE=1 SV=1	ILSCGELIPK	1xCarbamidomethyl [C4]; 1xTMTpro [K10]; 1xTMTpro [N-Term]	72.583	46	2.218e-05	56.5	67.2	93.9	108.3	110.8	99.2	118.3	101	142.6	141.6	313.7	351.1	300.9	402.8	174.3	186.1																	83	98.7	82.7	95	107.9	95.3	124.5	126	190	198.8
High	A2AR02	Peptidyl-prolyl cis-trans isomerase G OS=Mus musculus OX=10090 GN=Ppig PE=1 SV=1	KENSEGEK	2xTMTpro [K1; K8]; 1xTMTpro [N-Term]	27.5992	0	0.002889	36.1	35.7	52.7	55.3	68.1	58	69.6	83	88.7	106.4	226.1	238.3	257.6	358.4	123.5	129.6
High	A2AR02	Peptidyl-prolyl cis-trans isomerase G OS=Mus musculus OX=10090 GN=Ppig PE=1 SV=1	QSSQDNEVK	1xTMTpro [K9]; 1xTMTpro [N-Term]	26.8687	43	8.838e-06	315.6	346.1	394.6	507.7	411	461.3	404.7	439.6	430.6	501.2	1021.1	915.1	1029.1	1289.5	636.8	653.5	60	58.9	61.9	60.1	60.6	73	76.3	75.9	97	86.1	180.3	211.6	196.2	211.5	130.6	115.3	31.5	32.7	43.5	55.8	92.8	90.1	93.6	138.2	220.1	201.4
High	A2AR02	Peptidyl-prolyl cis-trans isomerase G OS=Mus musculus OX=10090 GN=Ppig PE=1 SV=1	SSEREESQSR	1xTMTpro [N-Term]	11.6904	11	0.001306																						3.3	5.6	5.4	7.2	6.1	33.6	43	52.3	57.9	15.2	19.8
High	A2AR02	Peptidyl-prolyl cis-trans isomerase G OS=Mus musculus OX=10090 GN=Ppig PE=1 SV=1	TDAASKPFAEVR	1xTMTpro [K6]; 1xTMTpro [N-Term]	46.396	11	8.838e-06	113.8	126.5	168	215.6	278.6	296.5	320.2	387.1	456.6	499.8	1254.2	1061.5	1214.3	1784.6	506.7	599.6
High	A2AR02	Peptidyl-prolyl cis-trans isomerase G OS=Mus musculus OX=10090 GN=Ppig PE=1 SV=1	VVKDFMVQGGDFSEGNGR	1xTMTpro [K3]; 1xTMTpro [N-Term]	66.4897	48	8.838e-06																	30.5	32	46.2	32.3	37.9	50.3	66.9	70.3	101.8	73.5	233.3	211.9	236.7	222.9	108.1	113.6
High	A2AR50	Ras-specific guanine nucleotide-releasing factor RalGPS1 OS=Mus musculus OX=10090 GN=Ralgps1 PE=1 SV=2	EILTAQTLK	1xTMTpro [K9]; 1xTMTpro [N-Term]	60.349	27	0.0003566																	24	33.5	27.8	32.4	29.8	33	23.9	24.6	20.9	27.1	35.6	47	37.7	51.9	31	31.7
High	A2AR50	Ras-specific guanine nucleotide-releasing factor RalGPS1 OS=Mus musculus OX=10090 GN=Ralgps1 PE=1 SV=2	FHAILWHK	1xTMTpro [K8]; 1xTMTpro [N-Term]	59.3698	33	8.838e-06	45.6	44.8	52.1	60.5	60.5	63.1	49	61.4	60.4	50.3	77.5	84.1	66.3	100.5	67.6	71.6	30.9	27.8	32.7	37.9	28.5	38	31.9	35.8	35.8	38.5	53.5	70.8	50.4	70.7	38.3	39.2	64.6	56.4	56.9	60.2	72.3	46.2	62.4	67.3	80.8	75.4
High	A2AR50	Ras-specific guanine nucleotide-releasing factor RalGPS1 OS=Mus musculus OX=10090 GN=Ralgps1 PE=1 SV=2	FVEDDNYK	1xTMTpro [K8]; 1xTMTpro [N-Term]	51.931	32	6.035e-05	104.4	103.5	137.3	147.7	148.3	153.8	120.8	138.5	91.3	113.3	129.8	139.1	127	173.3	138.6	141.8
High	A2AR50	Ras-specific guanine nucleotide-releasing factor RalGPS1 OS=Mus musculus OX=10090 GN=Ralgps1 PE=1 SV=2	HLLDDSVLESR	1xTMTpro [N-Term]	52.434	48	8.838e-06	48.2	54.3	69	68.3	70.8	79.6	65.2	74.6	77.6	77.1	169.4	187.2	165.7	188.9	92.9	126.6
High	A2AR50	Ras-specific guanine nucleotide-releasing factor RalGPS1 OS=Mus musculus OX=10090 GN=Ralgps1 PE=1 SV=2	HSLAPNVVAFTR	1xTMTpro [N-Term]	52.6434	75	8.838e-06	8.4	10.1	14.2	12.8	10.4	10.5	8.2	13.3	15.1	14.2	17.4	18.8	18.6	21.3	13.2	12.9																	15	14.5	13.2	17.1	15.5	14.5	11.9	14.7	12	11.2
High	A2AR50	Ras-specific guanine nucleotide-releasing factor RalGPS1 OS=Mus musculus OX=10090 GN=Ralgps1 PE=1 SV=2	SYDAVVFDVLK	1xTMTpro [K11]; 1xTMTpro [N-Term]	88.792	28	9.049e-05	53.4	60.4	73.4	80.7	72.9	79.7	53.1	73.6	52	59.6	75.9	105.7	75.4	124.2	75.7	84.9
High	A2AR50	Ras-specific guanine nucleotide-releasing factor RalGPS1 OS=Mus musculus OX=10090 GN=Ralgps1 PE=1 SV=2	TWALLNR	1xTMTpro [N-Term]	61.2817	9	0.001306	27.9	25.2	38	51.2	46.4	63.6	48.7	60.2	61.5	69.9	71.4	73.1	49	66.3	55.3	52.3	25	24.5	27.5	36.3	41.2	46.4	47.3	41.3	48.5	48.2	54.5	48.2	46.5	49	46.4	41.6	60.1	55.3	56.8	78.1	74.7	69.5	64.4	90.3	108.4	98.6
High	A2ARP1	Inositol hexakisphosphate and diphosphoinositol-pentakisphosphate kinase 1 OS=Mus musculus OX=10090 GN=Ppip5k1 PE=1 SV=1	ASDEPDR	1xTMTpro [N-Term]	17.6052	22	0.001546	58.4	54.3	65.4	78.3	83.7	94	72.8	98.7	46.5	74.1	40.4	50.3	39.7	61.5	66.7	60.4
High	A2ARP1	Inositol hexakisphosphate and diphosphoinositol-pentakisphosphate kinase 1 OS=Mus musculus OX=10090 GN=Ppip5k1 PE=1 SV=1	FFALFEK	1xTMTpro [K7]; 1xTMTpro [N-Term]	95.2724	30	0.0001526	66.7	67.1	83.3	109.1	92.4	110.1	88.4	106.2	67.2	78.3	65.2	64.6	64.4	81	75.6	80.9	83.3	98.1	86.3	102.9	91.2	131.4	101.6	121.3	86.8	73.5	68.4	79.9	79	83.7	89	78.2	122.2	133.9	113.9	122.8	131.1	132.9	122	153.2	100.3	106.7
High	A2ARP1	Inositol hexakisphosphate and diphosphoinositol-pentakisphosphate kinase 1 OS=Mus musculus OX=10090 GN=Ppip5k1 PE=1 SV=1	ILGNTIMR	1xTMTpro [N-Term]	58.4011	14	0.0003641	62.1	58	83.6	88.5	92.6	99.8	79.6	91.9	70.7	72.1	59.2	55.3	58	78.3	78.3	78.8	75.6	110.2	84.4	113.7	108.9	123.5	111.1	124.1	77.6	69	67.9	70.9	69.5	88.4	96.6	84.2	91.4	83.5	89	87.4	100.3	105.1	94.5	107.5	83.2	89.1
High	A2ARP1	Inositol hexakisphosphate and diphosphoinositol-pentakisphosphate kinase 1 OS=Mus musculus OX=10090 GN=Ppip5k1 PE=1 SV=1	ILLDLQR	1xTMTpro [N-Term]	68.321	19	0.0009002	58.5	70.3	68.1	87.1	88.8	96.5	74.9	91	51.2	54.6	48.7	46.7	48.5	72.8	75.3	80.1	37	49.5	43.5	49.9	44.6	67.5	56.6	57.7	33.9	37.7	20.8	30.6	31.5	35.5	42.3	41.3
High	A2ARP1	Inositol hexakisphosphate and diphosphoinositol-pentakisphosphate kinase 1 OS=Mus musculus OX=10090 GN=Ppip5k1 PE=1 SV=1	KILLDLQR	1xTMTpro [K1]; 1xTMTpro [N-Term]	62.0527	7	0.0006133	154.9	163.3	204.5	246.2	232.4	285.5	218.5	250.3	135.2	150.1	103.3	116.5	95.6	148.4	172.3	175.6	74.2	96.1	87.6	115.4	99.4	143.6	116.8	137.9	84.9	71.2	54.4	57.1	57.8	72.6	93.7	89.5	146.8	149.2	142.8	150.6	167.3	143.7	172.9	171.4	131.3	137.5
High	A2ARP1	Inositol hexakisphosphate and diphosphoinositol-pentakisphosphate kinase 1 OS=Mus musculus OX=10090 GN=Ppip5k1 PE=1 SV=1	QTVCGFDLLR	1xCarbamidomethyl [C4]; 1xTMTpro [N-Term]	67.5131	32	0.0006133																																	138	136.2	136	141	168.9	131.5	136.3	151.2	142	137.1
High	A2ARP1	Inositol hexakisphosphate and diphosphoinositol-pentakisphosphate kinase 1 OS=Mus musculus OX=10090 GN=Ppip5k1 PE=1 SV=1	VYTVGPDYAHAEAR	1xTMTpro [N-Term]	43.632	77	8.838e-06	64.3	55.8	74.5	89.8	85.5	90.5	64.5	75.5	72.9	80.5	85.9	87.6	79.6	76.7	85.6	86.9
High	A2ARP1	Inositol hexakisphosphate and diphosphoinositol-pentakisphosphate kinase 1 OS=Mus musculus OX=10090 GN=Ppip5k1 PE=1 SV=1	YGGLLDETQDAQWQR	1xTMTpro [N-Term]	62.8051	77	8.838e-06																																	143.4	147.4	132.4	127	125.5	125.1	117.7	141.8	120	111.6
High	A2ARP1	Inositol hexakisphosphate and diphosphoinositol-pentakisphosphate kinase 1 OS=Mus musculus OX=10090 GN=Ppip5k1 PE=1 SV=1	YYDDCAK	1xCarbamidomethyl [C5]; 1xTMTpro [K7]; 1xTMTpro [N-Term]	39.2629	15	0.0004904																	114.1	134	131.3	145	146.2	163.1	139.2	164.2	139.4	123.4	138.9	146.3	147.4	157	150.3	160.6
High	A2ARS0	Ankyrin repeat domain-containing protein 63 OS=Mus musculus OX=10090 GN=Ankrd63 PE=1 SV=1	AGALMARPNSPQSSGSGR	1xTMTpro [N-Term]	34.5082	28	8.838e-06	186.4	237.9	328.1	404.6	358.6	461.8	289.1	374	360	444.4	578.2	925.5	584.7	973.3	422.3	459	131.4	95.4	185	120.3	203.9	181.3	208.4	180.1	235.3	182.7	365.9	390.5	383.5	372.5	246.8	252.7	213.2	172.5	204.3	176.6	243.5	187.4	262.8	267.7	305.2	326.5
High	A2ARS0	Ankyrin repeat domain-containing protein 63 OS=Mus musculus OX=10090 GN=Ankrd63 PE=1 SV=1	AGALMARPNSPQSSGSGR	1xOxidation [M5]; 1xTMTpro [N-Term]	27.7956	17	0.0001612																	31.2	32.1	44.3	36.9	42	50.6	53.8	47.4	55.3	40.6	64.3	63.8	64.4	61.7	48.7	59
High	A2ARS0	Ankyrin repeat domain-containing protein 63 OS=Mus musculus OX=10090 GN=Ankrd63 PE=1 SV=1	AGLTALQLAASR	1xTMTpro [N-Term]	61.6593	34	8.838e-06	309.6	327.1	440.7	503	435.4	500	402.8	473.8	514.9	557.7	729.3	801.5	636.8	784.1	537.4	545.6	226.4	185.2	268.8	222.7	271.3	268.9	294.1	258.1	335.7	243.8	436.8	404.6	453	386.3	320.7	331.5	546.7	502.4	486.8	476.5	577	505.8	543.2	573.1	706.4	694.5
High	A2ARS0	Ankyrin repeat domain-containing protein 63 OS=Mus musculus OX=10090 GN=Ankrd63 PE=1 SV=1	AQGNERPELGR	1xDeamidated [N4]; 1xTMTpro [N-Term]	25.9584	21	3.865e-05	30.7	31	30.2	32.9	29.2	39.2	29	33.7	28	34.4	42	40.6	37.4	45.1	34.9	31	33.7	40	37.4	32.8	40.4	39.3	39.5	34.6	40.8	31.6	50.2	46.4	55.4	48.1	46.4	44.2	89.3	59.7	72.9	67.9	70.9	59.9	64.6	77.4	77	73.1
High	A2ARS0	Ankyrin repeat domain-containing protein 63 OS=Mus musculus OX=10090 GN=Ankrd63 PE=1 SV=1	AQGNERPELGR	1xTMTpro [N-Term]	22.6371	14	0.0001645	199.7	209.1	309.3	325	335.2	377.9	303.8	353.6	362.3	413.7	683.6	707.1	663.4	790.3	415.5	434.3	277.4	227.6	373.1	306.7	447.8	370.3	427.2	357.8	544.3	390.4	798.7	684.3	805.3	670.5	503.7	537.8	380	306.2	391.3	382.2	452.7	404.6	418.7	466.1	538.4	576.6
High	A2ARS0	Ankyrin repeat domain-containing protein 63 OS=Mus musculus OX=10090 GN=Ankrd63 PE=1 SV=1	FVLDALDR	1xTMTpro [N-Term]	74.6033	27	6.035e-05	54.4	61	93.4	97	93.3	105.4	82.8	94.9	107	123	211.2	220.3	197.5	229	122.8	127.1	28.9	23.1	37.5	24.3	41.4	22.3	41.7	27	47.8	35.2	65.6	56.3	64.1	55.8	51.2	56.2	103.3	98	111.5	107.7	131.1	106.1	120.5	144	158.7	168.8
High	A2ARS0	Ankyrin repeat domain-containing protein 63 OS=Mus musculus OX=10090 GN=Ankrd63 PE=1 SV=1	LGLRLDR	1xTMTpro [N-Term]	47.5245	10	0.003231																	78.9	40.9	144.2	68.5	84	121.9	126.2	116.3	239.3	78.3	273.3	179.3	224.4	183.5	144.5	152.7
High	A2ARS0	Ankyrin repeat domain-containing protein 63 OS=Mus musculus OX=10090 GN=Ankrd63 PE=1 SV=1	LLLEQGAAVNLR	1xTMTpro [N-Term]	71.0376	61	8.838e-06	38.3	41.3	42.1	45.2	36.9	39.8	36.2	40.3	36.9	42.7	51.6	61.2	58.1	63.7	41.6	50.9
High	A2ARS0	Ankyrin repeat domain-containing protein 63 OS=Mus musculus OX=10090 GN=Ankrd63 PE=1 SV=1	LLLEQGAAVNLRDER	1xTMTpro [N-Term]	62.1388	14	8.838e-06																	144.1	114.8	175.8	163.6	184.9	180.4	199.2	192.6	217.8	148.4	250.1	216.9	274.7	237.4	232.5	246.4	162.4	161.8	170.9	171.9	206	182.9	224.5	219.6	241	251.4
High	A2ARS0	Ankyrin repeat domain-containing protein 63 OS=Mus musculus OX=10090 GN=Ankrd63 PE=1 SV=1	TALSLACER	1xCarbamidomethyl [C7]; 1xTMTpro [N-Term]	46.4806	30	6.035e-05	23.2	17.7	26.4	37.4	34.2	36.5	31.3	32.7	39.4	34	57.7	59.3	60.2	81.3	39.9	40	109.9	78.3	129.6	112.2	143.5	117.9	140	119	176.6	105	251.6	204.9	267.3	242.3	168.9	165.1	96.1	82.7	100.4	94.9	114.4	92.4	102.2	117.7	134.8	115.2
High	A2ARS0	Ankyrin repeat domain-containing protein 63 OS=Mus musculus OX=10090 GN=Ankrd63 PE=1 SV=1	TFLEAMQAGK	1xTMTpro [K10]; 1xTMTpro [N-Term]	67.6235	55	8.838e-06	57.6	65.7	91.9	113.3	98.4	118.3	85.4	113.2	100.8	103.4	162.4	175.9	172.5	213.5	122.2	121.5	110.6	95.8	144.6	120.4	160.1	138.7	172.8	134.3	203.3	138.7	274.2	228.6	282.3	249.2	191.7	199.9	188.3	178.8	169.4	177.2	201.1	175	182	216.2	224.7	217.3
High	A2ARS0	Ankyrin repeat domain-containing protein 63 OS=Mus musculus OX=10090 GN=Ankrd63 PE=1 SV=1	TPLMVAVGLPDPAMR	1xTMTpro [N-Term]	85.7538	64	8.838e-06	11.6	17.8	20.3	21.3	16.2	20.7	15.6	16.5	22.3	22.9	28.4	49.9	30	40.4	24.6	24.1																	33.5	39.1	33	27.6	31.2	24.2	31.2	31.4	24.8	24.5
High	A2ASQ1	Agrin OS=Mus musculus OX=10090 GN=Agrn PE=1 SV=1	AVCECQR	2xCarbamidomethyl [C3; C5]; 1xTMTpro [N-Term]	20.6153	20	0.0004904	23.5	39.8	35.8	61	50.6	79.8	49.3	79.2	40.1	58.7	50.5	51.6	75.1	75.2	53.2	57	36.2	50.1	38.8	62.6	37.4	84	45.1	66.8	44	58.6	49.3	56.4	61.7	90.2	63.3	58.3	53.2	84.8	77.9	84	82.7	101.9	81.9	127.6	84.5	114.5
High	A2ASQ1	Agrin OS=Mus musculus OX=10090 GN=Agrn PE=1 SV=1	CACPLGR	2xCarbamidomethyl [C1; C3]; 1xTMTpro [N-Term]	30.3319	5	0.003833	20.7	23.4	23.4	41.8	27.8	42.3	36	43.9	33.2	33.1	38.6	33.9	41.7	60.1	29.7	34.6
High	A2ASQ1	Agrin OS=Mus musculus OX=10090 GN=Agrn PE=1 SV=1	EAACQQQVQIEEAR	1xCarbamidomethyl [C4]; 1xTMTpro [N-Term]	35.3198	74	8.838e-06	33.5	31.3	40.9	55.3	44	50	45.2	54.6	47.9	54	44.1	45.6	45.6	59.7	46.7	46	19.4	26.2	31.9	40.6	33.1	49.5	40.4	44.2	39.6	38.4	31.3	38.2	33.6	45.5	40.5	39.1	31.1	27.5	33.8	33.4	41.2	24.2	40.9	28.9	43.5	39.8
High	A2ASQ1	Agrin OS=Mus musculus OX=10090 GN=Agrn PE=1 SV=1	GHQLLTQEHVLR	1xTMTpro [N-Term]	37.7041	41	8.838e-06																																	98.3	97	58.8	56.7	56.6	49.6	60.1	50.8	67.2	48.9
High	A2ASQ1	Agrin OS=Mus musculus OX=10090 GN=Agrn PE=1 SV=1	GHSFLAFPTLR	1xTMTpro [N-Term]	67.3844	50	8.838e-06																	32.5	32.3	33.9	30.5	35.6	43.4	43.6	43.3	48	43.6	55	72	68.8	83.2	52.7	49.7	35	33	33.1	32.9	46.2	38.6	40.3	42.4	51.5	42.6
High	A2ASQ1	Agrin OS=Mus musculus OX=10090 GN=Agrn PE=1 SV=1	GLHTFER	1xTMTpro [N-Term]	33.7895	26	0.001199	80.4	95.2	110.3	138.2	156	179.8	138.1	175.4	135.4	147.8	140.1	154.9	176.4	205	139.8	151.1	75.7	87.6	103	109.7	113.4	133.9	121.8	129.6	117.3	118.2	113.5	134.6	134	140.1	121.1	132.4	119.4	106.2	114.1	121.6	147.3	132.5	133	154.7	168.2	135
High	A2ASQ1	Agrin OS=Mus musculus OX=10090 GN=Agrn PE=1 SV=1	MALEMVFLAR	1xTMTpro [N-Term]	93.223	43	8.838e-06	22.2	27.9	33	34	33	45.5	32.4	40.6	32.2	39.3	38.3	42.3	43	60.9	38.7	35.5	34.5	44	52.3	53.2	46.1	73.2	68.5	70.9	73.8	59	60.4	65.2	73.2	87.3	60.9	67.3	34.6	41.5	31.7	43.2	53.3	39.9	43.7	51.3	48.2	45.7
High	A2ASQ1	Agrin OS=Mus musculus OX=10090 GN=Agrn PE=1 SV=1	SIESTLDDLFR	1xTMTpro [N-Term]	90.5182	37	8.838e-06																	146.7	181.8	171.9	187.3	194.8	236.8	208.7	231.4	252.9	249.5	229.2	267.9	236.7	283.1	225.9	228.2
High	A2ASQ1	Agrin OS=Mus musculus OX=10090 GN=Agrn PE=1 SV=1	TSVGIGLK	1xTMTpro [K8]; 1xTMTpro [N-Term]	54.6994	29	7.513e-05	230.1	251.6	293	394.8	351.1	385.8	284.1	367.7	306.5	311	287.3	310.5	283	401.4	323.8	319
High	A2ASQ1	Agrin OS=Mus musculus OX=10090 GN=Agrn PE=1 SV=1	VQLPSVPAFK	1xTMTpro [K10]; 1xTMTpro [N-Term]	77.2238	32	7.115e-05	28.6	30.2	52.4	58.8	53.5	61.4	52.8	62.1	54.1	59.2	56.8	67.6	60	92.1	58.6	54.7																	49.1	51.2	44	51.3	60.6	60.1	58.1	76	66.8	59.6
High	A2ASZ8	Calcium-binding mitochondrial carrier protein SCaMC-2 OS=Mus musculus OX=10090 GN=Slc25a25 PE=1 SV=1	FMAYEQMK	1xTMTpro [K8]; 1xTMTpro [N-Term]	63.9166	26	0.0005777	442.8	415.9	261.7	314.6	133.2	136.6	79.4	77.3	74.3	57	31.8	35.8	21.8	25.3	175.5	178.8	179.2	235.5	124	113.7	54.8	51	36	32.7	25.3	26.6	13.7	18.2	18.7	16.5	61.1	72	197.9	198	92	95.7	49.7	34.7	32	23.9	33.6	21.9
High	A2ASZ8	Calcium-binding mitochondrial carrier protein SCaMC-2 OS=Mus musculus OX=10090 GN=Slc25a25 PE=1 SV=1	HLVAGGGAGAVSR	1xTMTpro [N-Term]	29.1737	43	8.838e-06																	20.4	25.7	17.9	18.2	17.5	11.6	13.3	10.7	12.5	8.6	10.9	13.1	10.8	12.3	15.4	14.6
High	A2ASZ8	Calcium-binding mitochondrial carrier protein SCaMC-2 OS=Mus musculus OX=10090 GN=Slc25a25 PE=1 SV=1	IDAQEIMQSLR	1xTMTpro [N-Term]	77.5737	46	8.838e-06	134.6	120.8	80	89.2	45.1	47.6	32.5	39.1	38.8	46.5	32	31.8	22.8	30.6	63.4	69.9	123.2	158.7	86.2	86.9	47.6	46.7	40.5	42.8	58.6	57.4	45.2	46.6	27.3	27.7	66.7	71.4	309.9	282.7	150.6	167	121.4	106.5	106.4	98.8	107.8	86.1
High	A2ASZ8	Calcium-binding mitochondrial carrier protein SCaMC-2 OS=Mus musculus OX=10090 GN=Slc25a25 PE=1 SV=1	ISEQQAEK	1xTMTpro [K8]; 1xTMTpro [N-Term]	35.6885	18	0.0008459																																	448.1	449.3	208.9	212.8	139.8	130	105.1	106.2	116.1	94.2
High	A2ASZ8	Calcium-binding mitochondrial carrier protein SCaMC-2 OS=Mus musculus OX=10090 GN=Slc25a25 PE=1 SV=1	ITLGVQSR	1xTMTpro [N-Term]	48.5595	19	0.0007157	625.3	648.3	406	439.3	174.1	170.6	106.4	112	96	95.4	51.7	45.9	42	42.7	236.6	240.3																	857	900.1	336.1	417.8	204.7	131.4	115.5	89.3	100.1	63.7
High	A2ASZ8	Calcium-binding mitochondrial carrier protein SCaMC-2 OS=Mus musculus OX=10090 GN=Slc25a25 PE=1 SV=1	LVGSDQETLR	1xTMTpro [N-Term]	40.9683	33	0.0001066	1393.3	1416	826.3	973.9	336.2	356.9	232.5	200.6	218.3	177.7	129.5	125.8	128.5	137.6	517.8	552.1	937.1	1212.9	580.4	538.4	207.5	217.4	132	125	107.6	96.3	108.6	127.7	162.1	155.9	345.3	353.6	1656.9	1606.9	587	625.8	278	203	189	102.9	175.2	85.5
High	A2ASZ8	Calcium-binding mitochondrial carrier protein SCaMC-2 OS=Mus musculus OX=10090 GN=Slc25a25 PE=1 SV=1	TCTAPLDR	1xCarbamidomethyl [C2]; 1xTMTpro [N-Term]	29.454	7	0.0003601																	919.2	1109.2	511.3	593	253.6	276	186.8	167.4	175.7	147.1	221.3	240.5	331.1	350.1	358.4	359.8	167.6	146.9	66.4	75.8	38.1	27.4	32.1	22.1	36.4	18.7
High	A2ASZ8	Calcium-binding mitochondrial carrier protein SCaMC-2 OS=Mus musculus OX=10090 GN=Slc25a25 PE=1 SV=1	TEGAFGLYR	1xTMTpro [N-Term]	53.2599	12	0.0001194																																	750.2	695.1	361.2	383	251.3	212.8	202.1	210.4	204.2	171.6
High	A2AWA9	Rab GTPase-activating protein 1 OS=Mus musculus OX=10090 GN=Rabgap1 PE=1 SV=1	CEIQEAVSR	1xCarbamidomethyl [C1]; 1xTMTpro [N-Term]	36.9572	36	0.0001436	227.8	251	231.9	301.8	240.2	297.2	214.8	239.2	184.7	168.3	165.7	155.9	133.4	187.7	214.5	205.4	247.2	291.4	221.9	309.6	205.3	297.2	215.5	277.6	192.8	182.1	131.5	174	135	153.8	193.3	198.6	404.4	373.9	319.7	373.8	330.2	296.5	291	330.4	248.4	234.9
High	A2AWA9	Rab GTPase-activating protein 1 OS=Mus musculus OX=10090 GN=Rabgap1 PE=1 SV=1	CFGLLLSPGK	1xCarbamidomethyl [C1]; 1xTMTpro [K10]; 1xTMTpro [N-Term]	77.9603	30	8.838e-06	53.6	48.1	53.8	74.2	60.5	78	57.2	72.8	39.3	45.2	39.4	30.3	32.4	50	52	56.9	67.7	81	66.5	106.4	69.5	91.1	65.8	84.3	58.6	56.7	44.8	65.3	46.7	54.1	62	56.1
High	A2AWA9	Rab GTPase-activating protein 1 OS=Mus musculus OX=10090 GN=Rabgap1 PE=1 SV=1	DLDNAEEKADALNKELLMTK	3xTMTpro [K8; K14; K20]; 1xTMTpro [N-Term]	76.1904	8	2.218e-05																	93.7	114.5	117.1	129.3	129	180.3	193.7	210.9	130.6	117.1	79.1	107	69.1	89.7	141.2	145.2
High	A2AWA9	Rab GTPase-activating protein 1 OS=Mus musculus OX=10090 GN=Rabgap1 PE=1 SV=1	DTGGDGQDSLYK	1xTMTpro [K12]; 1xTMTpro [N-Term]	38.3405	54	8.838e-06																	20	21	16	30.2	23.8	31.1	24.7	27.4	21.1	18.4	16.4	21.5	14	23.8	23.9	22.2
High	A2AWA9	Rab GTPase-activating protein 1 OS=Mus musculus OX=10090 GN=Rabgap1 PE=1 SV=1	EMELELAQTK	1xTMTpro [K10]; 1xTMTpro [N-Term]	62.3134	37	6.035e-05	130.6	128.5	151.8	157.4	158.6	162.9	141.6	160.8	100.4	115.4	129.6	114.4	110.1	133.9	152.2	159.6	207.5	296.3	250.2	290.8	257.8	285.2	284.6	262.1	228.8	206.7	218.5	244.5	188.4	256.3	238.8	253.7	260.5	229	217.8	218.4	229.3	202.6	250.7	246	246.5	209.8
High	A2AWA9	Rab GTPase-activating protein 1 OS=Mus musculus OX=10090 GN=Rabgap1 PE=1 SV=1	EQQAQQEDPIER	1xTMTpro [N-Term]	28.9581	44	2.218e-05	96.7	112.7	129.3	173.4	146.7	183.8	114.7	147.5	126.6	124.8	197.9	232	223.2	356.4	181.7	177.5																	109.4	116.6	100.7	103.1	105.4	109.3	107.8	115.8	111.9	113.8
High	A2AWA9	Rab GTPase-activating protein 1 OS=Mus musculus OX=10090 GN=Rabgap1 PE=1 SV=1	ESPQDSAITR	1xTMTpro [N-Term]	27.5815	27	0.0003075	483.2	533.3	615	709	599	683	520.4	579.5	397.1	434.3	374.5	397.8	372.4	451.4	519.1	545.9	385	468.9	427.4	479.9	382.4	548.1	460	496.8	368.9	340.4	283.7	389.6	325	383	383.2	404.8	305.4	300.4	284.7	293.8	300.5	271.1	257	310.8	225.7	254.5
High	A2AWA9	Rab GTPase-activating protein 1 OS=Mus musculus OX=10090 GN=Rabgap1 PE=1 SV=1	GVSDEDTDEEKETLK	2xTMTpro [K11; K15]; 1xTMTpro [N-Term]	42.6275	28	8.838e-06	85	85.3	84.1	102.5	128.6	117.1	91.2	133.7	63.2	103.2	72.2	57.4	61.8	87.3	109.7	100.5	101.4	145.5	96.7	153.1	133.5	150.3	128.1	129.3	104.4	102.6	55.9	89.6	59.2	80	99.8	111.8	105.1	74.8	111.1	122.6	119.6	119.5	80.9	126	73.5	90.8
High	A2AWA9	Rab GTPase-activating protein 1 OS=Mus musculus OX=10090 GN=Rabgap1 PE=1 SV=1	IMFDYGLR	1xTMTpro [N-Term]	71.4183	22	0.0002864	63	68.8	69	74.7	62	84.4	61.3	64.2	48.9	64.7	57	59.1	55.8	68.9	68.4	66	103.6	103.6	101.3	110.5	96.4	122.2	91.5	104.6	84.5	103.3	75.2	110.4	93.7	114.2	93.9	100
High	A2AWA9	Rab GTPase-activating protein 1 OS=Mus musculus OX=10090 GN=Rabgap1 PE=1 SV=1	IQDLEHHLGLALSEVQAAK	1xTMTpro [K19]; 1xTMTpro [N-Term]	86.421	16	8.838e-06	74.7	77.9	88.5	106.7	92.3	93.7	65.8	96.8	69.5	80.7	85.7	84.1	86.3	97.4	88.1	96.3	64.9	96.5	75.2	92.1	78.1	107.5	87.8	100.5	85.1	90.1	95.9	128.1	93.8	120	94.2	97.1	97.1	84.5	87.1	100.4	88.6	75	77.6	86.4	77.3	78.4
High	A2AWA9	Rab GTPase-activating protein 1 OS=Mus musculus OX=10090 GN=Rabgap1 PE=1 SV=1	IVICVQQTANK	1xCarbamidomethyl [C4]; 1xTMTpro [K11]; 1xTMTpro [N-Term]	60.5195	24	0.0004495																																	384.6	339.1	239.8	296.6	231.2	229.3	186.1	222.1	210.9	202
High	A2AWA9	Rab GTPase-activating protein 1 OS=Mus musculus OX=10090 GN=Rabgap1 PE=1 SV=1	LFWPFSK	1xTMTpro [K7]; 1xTMTpro [N-Term]	96.2074	16	0.002109	54.7	65.6	75	88.4	74.5	95	64.6	81.1	50.7	56.1	49.6	55.8	42.7	57.2	57.4	75.1	63.4	76.6	73.4	79.9	58.6	85.4	73	77	61.6	60.3	34.4	51.1	40.5	51	69.1	78.6	73.1	75.1	58.9	75.5	71.6	65.5	59.3	70.4	55.6	51.5
High	A2AWA9	Rab GTPase-activating protein 1 OS=Mus musculus OX=10090 GN=Rabgap1 PE=1 SV=1	LIDAEDEKR	1xTMTpro [K8]; 1xTMTpro [N-Term]	44.7835	6	7.513e-05																	243.7	330	247.4	333.3	288.6	374.7	318.1	315.4	262.6	252.5	175.1	246.2	180.4	205.8	284.9	273.6
High	A2AWA9	Rab GTPase-activating protein 1 OS=Mus musculus OX=10090 GN=Rabgap1 PE=1 SV=1	LLDPQTNTEIANYPIYK	1xTMTpro [K17]; 1xTMTpro [N-Term]	78.0818	78	8.838e-06	61.1	74.3	69.4	85.1	86.9	101.7	66.4	70.7	47.1	54.2	48.5	49.3	46.6	57.9	66.2	70.2	82.9	93.7	90.8	95.2	78.1	106.2	99.3	92.3	78.5	67.8	45.9	75.5	59.3	78.3	87.4	88.2	94.7	97.2	79.8	86	95.2	86.9	79.2	98.4	67.6	88.7
High	A2AWA9	Rab GTPase-activating protein 1 OS=Mus musculus OX=10090 GN=Rabgap1 PE=1 SV=1	LMELACNTK	1xCarbamidomethyl [C6]; 1xTMTpro [K9]; 1xTMTpro [N-Term]	62.1126	26	7.513e-05	148.8	165.7	181.8	217.2	178.8	202.9	143.9	150	115.9	130	118.5	130.5	116.9	158.9	138.1	156.1
High	A2AWA9	Rab GTPase-activating protein 1 OS=Mus musculus OX=10090 GN=Rabgap1 PE=1 SV=1	LQLVEAECK	1xCarbamidomethyl [C8]; 1xTMTpro [K9]; 1xTMTpro [N-Term]	61.4632	38	8.838e-06																	45.5	68	43.4	62.8	56.2	61	52.4	58.9	34.4	39.5	23.6	35.1	26.5	34	41.1	43.1	53.5	46.4	41.7	49.9	38.8	35	29.9	40.3	33.6	30
High	A2AWA9	Rab GTPase-activating protein 1 OS=Mus musculus OX=10090 GN=Rabgap1 PE=1 SV=1	LTYLGCASVNAPR	1xCarbamidomethyl [C6]; 1xTMTpro [N-Term]	60.1423	42	8.838e-06	87.2	98.8	91.2	110.3	97.8	109.4	90.3	124.6	90.3	96.4	116.8	135.8	100.2	111	109.5	131.4																	144.1	138.3	94.5	119.3	100.6	91.7	196.2	103.5	111.7	94.5
High	A2AWA9	Rab GTPase-activating protein 1 OS=Mus musculus OX=10090 GN=Rabgap1 PE=1 SV=1	QICSQLSER	1xCarbamidomethyl [C3]; 1xTMTpro [N-Term]	37.0971	16	7.513e-05																	73.4	107	84.8	114.7	101.1	108	101.9	98.4	76.1	83	67.1	81	63.3	75.8	88.1	89.7	238.3	213.1	214.8	231.9	254.7	211.2	193	242.8	207.4	209.3
High	A2AWA9	Rab GTPase-activating protein 1 OS=Mus musculus OX=10090 GN=Rabgap1 PE=1 SV=1	QKVDDCDR	1xCarbamidomethyl [C6]; 1xTMTpro [K2]; 1xTMTpro [N-Term]	24.4627	1	0.001445	93.3	114.6	106.5	146	106.8	136.9	111.7	121.3	69.8	98.8	91.3	81.7	65.6	95.1	117.5	106.1
High	A2AWA9	Rab GTPase-activating protein 1 OS=Mus musculus OX=10090 GN=Rabgap1 PE=1 SV=1	QLSSLVR	1xTMTpro [N-Term]	48.2482	27	0.001445	279.1	309.5	310.5	413.2	348.7	386.9	265.3	337.3	223.3	220.5	203.3	194.3	171.4	231.2	280.2	263.8	215.4	254.2	222.5	251.2	208.6	289	241.9	273.8	189.8	166.1	132.3	184.1	152	170.1	202.7	186.2	381.3	357.7	298.4	330.7	314.5	300.6	292.1	348.5	258.6	244.8
High	A2AWA9	Rab GTPase-activating protein 1 OS=Mus musculus OX=10090 GN=Rabgap1 PE=1 SV=1	QNFEDLHCK	1xCarbamidomethyl [C8]; 1xTMTpro [K9]; 1xTMTpro [N-Term]	41.5558	38	1.703e-05	92.9	110.7	103	117.7	91.3	111.7	77.4	93.7	68.8	84.4	77.4	80.3	67.6	87.3	98.1	104.3	216.7	268.5	194.6	249.7	205.5	256.2	189.1	236.8	187.6	179.5	133	202.8	156.2	198.8	204.9	210.4
High	A2AWA9	Rab GTPase-activating protein 1 OS=Mus musculus OX=10090 GN=Rabgap1 PE=1 SV=1	SGVPEALR	1xTMTpro [N-Term]	39.7534	20	0.0005395	349.7	365	384.6	471.4	385.2	421.1	345.4	399.1	347	393.6	336.7	336.8	290	326	373.5	399.6	385.2	515.7	387.4	485.5	380.2	462.1	373.7	405.1	328.6	302.1	232.4	281	242.7	270.6	336.1	358.1	309.7	264.9	267.8	297.9	282.7	259.9	226.8	266.2	238.3	213.2
High	A2AWA9	Rab GTPase-activating protein 1 OS=Mus musculus OX=10090 GN=Rabgap1 PE=1 SV=1	STTENFFLK	1xTMTpro [K9]; 1xTMTpro [N-Term]	68.0041	45	8.838e-06	282.1	315.9	334.8	395	326.9	390.7	276.5	326.8	251.4	262	238.7	248.5	218.9	297.4	319.6	303.9	244	276	267.2	303.2	238.3	344.3	274.6	317.2	254.5	243.8	278.7	331	251.4	309.5	253.3	279.1	356.4	360.5	301.2	332.6	327.4	296.3	280.5	325	265.8	264
High	A2AWA9	Rab GTPase-activating protein 1 OS=Mus musculus OX=10090 GN=Rabgap1 PE=1 SV=1	TFPAHDYFK	1xTMTpro [K9]; 1xTMTpro [N-Term]	55.9187	12	3.865e-05	303.3	359.3	381.8	465.5	376.8	438.4	286.2	357.8	245.1	305.9	207	224.4	178.3	223.5	334.6	337.9
High	A2AWA9	Rab GTPase-activating protein 1 OS=Mus musculus OX=10090 GN=Rabgap1 PE=1 SV=1	VCSPNER	1xCarbamidomethyl [C2]; 1xTMTpro [N-Term]	22.7074	7	0.00339																	155.4	191	173.4	208.3	175.8	240.7	206.7	232.5	190.2	183.7	121.6	177.7	109.3	132.6	178.2	160.9	127.4	135.6	119.4	121.2	131	119.4	116.2	142.1	129.1	129.4
High	A2AWP8	Rho guanine nucleotide exchange factor 10-like protein OS=Mus musculus OX=10090 GN=Arhgef10l PE=1 SV=1	ACLTKPAFLEFLK	1xCarbamidomethyl [C2]; 2xTMTpro [K5; K13]; 1xTMTpro [N-Term]	90.967	11	2.785e-05																	38.5	45.1	35.7	56.4	38.3	50.9	39.8	41.5	32.3	28.4	27.8	33.9	39.1	39.1	43.5	32.9
High	A2AWP8	Rho guanine nucleotide exchange factor 10-like protein OS=Mus musculus OX=10090 GN=Arhgef10l PE=1 SV=1	ATAAGQAQNK	1xTMTpro [K10]; 1xTMTpro [N-Term]	26.9491	34	2.218e-05																																	31.8	27.9	34.6	26.6	28.6	26.3	29	31.2	23.9	22
High	A2AWP8	Rho guanine nucleotide exchange factor 10-like protein OS=Mus musculus OX=10090 GN=Arhgef10l PE=1 SV=1	GILLQYR	1xTMTpro [N-Term]	57.3929	15	0.001023																	84.6	100.9	92.4	99.3	73	92.3	85.3	99.3	65.3	63.9	56.8	62.5	71.3	85	88.7	83.1	118.2	124.2	113.7	106.3	107.2	94	93.5	91.7	81.1	76.4
High	A2AWP8	Rho guanine nucleotide exchange factor 10-like protein OS=Mus musculus OX=10090 GN=Arhgef10l PE=1 SV=1	IGDLFVASFSK	1xTMTpro [K11]; 1xTMTpro [N-Term]	91.9414	38	1.703e-05	29.1	28.7	31.3	31.9	32	37.9	27.1	40.4	20.5	23.8	25.5	18.6	28.7	29.9	32.3	26.6	25.1	28.5	22.1	30.4	17.3	25.6	18.8	25	14.9	19.7	14.4	14.4	17.4	26.8	15.8	24.3	50.2	41.8	36.4	37.7	47.5	38.7	35.2	35.5	28.5	30.6
High	A2AWP8	Rho guanine nucleotide exchange factor 10-like protein OS=Mus musculus OX=10090 GN=Arhgef10l PE=1 SV=1	LFQELQDLQK	1xTMTpro [K10]; 1xTMTpro [N-Term]	84.5395	25	3.865e-05																																	83.6	79.4	51.8	62.9	70.4	56.8	50.7	65.9	58	62.1
High	A2AWP8	Rho guanine nucleotide exchange factor 10-like protein OS=Mus musculus OX=10090 GN=Arhgef10l PE=1 SV=1	LLTSGQR	1xTMTpro [N-Term]	39.66	20	0.001439	43.1	44.6	44.1	50.9	46.4	52.5	36.3	53.7	29.4	32.1	31.9	38.3	45.3	52.3	43.6	50.4	62.2	75.6	69	75.9	52.4	80.8	73.9	73.5	50.5	51.5	47.3	45.5	58.5	70.4	65.4	66.5	174.7	167.4	142.4	169.3	167	154.2	129.6	163.8	125.4	104.3
High	A2AWP8	Rho guanine nucleotide exchange factor 10-like protein OS=Mus musculus OX=10090 GN=Arhgef10l PE=1 SV=1	QVCSTDR	1xCarbamidomethyl [C3]; 1xTMTpro [N-Term]	18.9627	24	0.001257	89.3	105.2	105.8	117.7	110.9	132.6	98	119.7	94.1	108.4	92.5	93.7	74.5	113.8	106.4	114.8	86.4	118.7	94.8	131.7	106.3	147.6	109.7	119.2	100.6	105.5	76.9	86.1	81	109.3	103.1	105.3	103.1	92.8	81.2	74	76.6	71.1	69.6	73.9	72.3	65.3
High	A2AWP8	Rho guanine nucleotide exchange factor 10-like protein OS=Mus musculus OX=10090 GN=Arhgef10l PE=1 SV=1	TSGDIPWDLESPPMCITVGPGPIR	1xCarbamidomethyl [C15]; 1xTMTpro [N-Term]	91.4949	33	2.785e-05	12.1	14.2	13.6	16.4	12.3	14.4	8.5	11.4	12.6	9.7	11.3	12.4	8.3	12.6	13.4	12
High	A2AWP8	Rho guanine nucleotide exchange factor 10-like protein OS=Mus musculus OX=10090 GN=Arhgef10l PE=1 SV=1	VKEEEIHSANK	2xTMTpro [K2; K11]; 1xTMTpro [N-Term]	35.8478	7	0.0005055																	138.6	190.2	157.9	195.7	145.9	181.2	143.4	151.7	131.2	108.6	87.8	100.3	104.9	118.6	130.7	144.2
High	A2BDX3	Adenylyltransferase and sulfurtransferase MOCS3 OS=Mus musculus OX=10090 GN=Mocs3 PE=1 SV=1	AALSRDEILR	1xTMTpro [N-Term]	43.7716	17	0.001868																	175.4	152.9	191.1	150.9	139.5	181.2	153.9	171.1	146.2	108.3	186	149.1	199.6	186.9	183.1	180.4
High	A2BDX3	Adenylyltransferase and sulfurtransferase MOCS3 OS=Mus musculus OX=10090 GN=Mocs3 PE=1 SV=1	ALAEDWALDLVR	1xTMTpro [N-Term]	89.1905	55	8.838e-06	44.6	52.1	53.1	55.6	50.5	57.1	44.7	58	41.9	43	57.1	55.2	66.3	69.8	51.4	60.3	60.9	66	66.8	67.7	60.9	68.1	58.7	61.6	51.4	48.8	62	64.3	81.3	71.6	63.9	72	70.6	68.2	58.2	61	60.1	50.1	52.2	61	47.6	50.7
High	A2BDX3	Adenylyltransferase and sulfurtransferase MOCS3 OS=Mus musculus OX=10090 GN=Mocs3 PE=1 SV=1	FEGQMTVYHHDGGPCYR	1xCarbamidomethyl [C15]; 1xTMTpro [N-Term]	42.9382	46	8.838e-06	59.5	63.1	72.6	91.3	66.2	87.3	66.8	77.9	69.1	78.1	105	109.8	96.7	119.6	84.4	82.5
High	A2BDX3	Adenylyltransferase and sulfurtransferase MOCS3 OS=Mus musculus OX=10090 GN=Mocs3 PE=1 SV=1	GYDVVADCCDNVPTR	2xCarbamidomethyl [C8; C9]; 1xTMTpro [N-Term]	46.4628	59	8.838e-06	73.5	92.4	97.7	107.6	92.4	97.3	75.3	88.3	75.1	80.1	121.8	157.9	106.8	137.9	104	113	95.1	110	106.7	119.7	100.7	135.6	129.6	129.8	122.8	108.2	112.3	148.6	122.1	104.3	138.4	124.1	117.1	118.1	106.3	112.2	105.1	92.1	101.7	116	114.3	131.2
High	A2BDX3	Adenylyltransferase and sulfurtransferase MOCS3 OS=Mus musculus OX=10090 GN=Mocs3 PE=1 SV=1	LAAALTAEPEPERPLR	1xTMTpro [N-Term]	59.3776	47	8.838e-06																																	167.4	157.6	146.2	150	133.2	132.1	131.7	150.7	124.7	126.1
High	A2BDX3	Adenylyltransferase and sulfurtransferase MOCS3 OS=Mus musculus OX=10090 GN=Mocs3 PE=1 SV=1	LGLVDHDVVETSNLAR	1xTMTpro [N-Term]	61.7546	56	8.838e-06	130.4	136.1	150.3	185	125.9	161.8	101.1	147.8	120.5	118.3	152.9	152.4	151.2	204.1	157.1	158.9	128.3	151.4	122.1	132.5	99.7	126.5	100	120.9	108.3	106.2	112.9	116.2	104.4	108.6	123.7	142.3	334.3	294.5	241	242.6	240.3	197.2	199.7	240.8	229.9	213.4
High	A2BDX3	Adenylyltransferase and sulfurtransferase MOCS3 OS=Mus musculus OX=10090 GN=Mocs3 PE=1 SV=1	QVLHGEAQAGESK	1xTMTpro [K13]; 1xTMTpro [N-Term]	34.2657	59	8.838e-06	129.8	138.1	159	184.1	150.4	160.4	127.2	157.1	112.1	113	134.2	124.3	135.6	167.9	161.4	153.8																	293.5	273	253.9	284.8	253.4	240.7	224.3	261	216.8	221.2
High	A2BDX3	Adenylyltransferase and sulfurtransferase MOCS3 OS=Mus musculus OX=10090 GN=Mocs3 PE=1 SV=1	REEELASLK	1xTMTpro [K9]; 1xTMTpro [N-Term]	46.1387	21	8.838e-06	77.3	70.3	87.7	83.7	79.1	81	62.4	91.3	46.8	75.5	79	68.8	93.6	89.9	86.3	78.5																	218.3	173.1	176.9	170.5	206.9	172.2	159	175.3	175.6	140.6
High	A2BDX3	Adenylyltransferase and sulfurtransferase MOCS3 OS=Mus musculus OX=10090 GN=Mocs3 PE=1 SV=1	RPDCVVCGQQPTVTR	2xCarbamidomethyl [C4; C7]; 1xTMTpro [N-Term]	33.6941	82	8.838e-06	56.7	60.9	60.7	68.6	65.4	77.9	57	59.7	48.8	54.2	64.6	63.8	68.3	80.7	54.4	69.7	74.4	81.9	82.6	81	67	80	77.4	74.4	68.9	56.3	63	73.7	83.5	78.3	79.2	85.3
High	A2BDX3	Adenylyltransferase and sulfurtransferase MOCS3 OS=Mus musculus OX=10090 GN=Mocs3 PE=1 SV=1	YLVNDACVLAGRPLVSASALR	1xCarbamidomethyl [C7]; 1xTMTpro [N-Term]	75.0763	19	8.838e-06																																	191.1	199.1	170.2	182.3	159.2	150.4	153.7	181.3	157.4	151.9
High	A2BE28	Ribosomal biogenesis protein LAS1L OS=Mus musculus OX=10090 GN=Las1l PE=1 SV=1	AIEGSSSSSTGK	1xTMTpro [K12]; 1xTMTpro [N-Term]	33.4532	49	8.838e-06	13.6	14.4	20.9	28	31	35.6	26.3	35.8	51.4	59	136.4	137	102.6	118.5	58.2	62.3																	20.7	24.2	26.5	23.7	39.3	31.3	40.4	51.7	98.8	100.5
High	A2BE28	Ribosomal biogenesis protein LAS1L OS=Mus musculus OX=10090 GN=Las1l PE=1 SV=1	AMGQVLPDEEQEK	1xTMTpro [K13]; 1xTMTpro [N-Term]	53.7797	34	2.218e-05																	66.9	74.9	75.9	81.7	84.4	109	114	127.8	173	162.1	311.9	313.8	256.9	255.2	170.6	162.2
High	A2BE28	Ribosomal biogenesis protein LAS1L OS=Mus musculus OX=10090 GN=Las1l PE=1 SV=1	AWDGQSFKENQPESPSAR	1xTMTpro [K8]; 1xTMTpro [N-Term]	47.99	41	8.838e-06	13.6	10.1	31.6	26.4	35	48.7	48.4	55.6	119.9	103.6	295.3	292.7	207.2	242.8	120.5	106.4	15.6	16.5	21.9	24.4	26.9	38.5	62.5	54.2	117	93.9	283	282.6	223.7	194.3	105.7	115.8	24.1	25.2	31	24	48.1	37.8	56.1	58.3	127.6	121.7
High	A2BE28	Ribosomal biogenesis protein LAS1L OS=Mus musculus OX=10090 GN=Las1l PE=1 SV=1	EALQGSAWQVSSEDVR	1xTMTpro [N-Term]	54.3348	69	8.838e-06	63.8	69	92.5	104.6	94.3	109	74.4	87.4	102.2	96.7	212.5	219.4	178.7	206.2	126.9	131.4	50.5	53.9	61.7	53.5	57.3	64.9	63.7	61.4	83.5	75.4	143.9	147.1	122.3	118.6	83.5	89.4
High	A2BE28	Ribosomal biogenesis protein LAS1L OS=Mus musculus OX=10090 GN=Las1l PE=1 SV=1	ELLVSYEEEQFK	1xTMTpro [K12]; 1xTMTpro [N-Term]	73.9633	43	8.838e-06																	95.4	107.3	113.8	119	90.9	108.1	110.2	99.8	131.3	121.5	188.1	205.4	170.5	169.3	139.5	145.9	76.7	80	70.8	62.8	73.6	64.1	78.4	82	127.3	129.3
High	A2BE28	Ribosomal biogenesis protein LAS1L OS=Mus musculus OX=10090 GN=Las1l PE=1 SV=1	FVNLISER	1xTMTpro [N-Term]	68.901	19	0.0004937	80.8	94.5	108.3	131.4	129.9	134.8	124.6	131.4	183	178.3	410.8	433.6	278.2	338	186.8	207.5																	114	121.1	124.1	124.2	165.9	135.2	193.7	187.6	312	298.7
High	A2BE28	Ribosomal biogenesis protein LAS1L OS=Mus musculus OX=10090 GN=Las1l PE=1 SV=1	GCYFVLNWLQK	1xCarbamidomethyl [C2]; 1xTMTpro [K11]; 1xTMTpro [N-Term]	96.4414	19	9.049e-05	32.6	43.3	41.4	54.8	60.1	66.6	45.1	57.3	69.7	72.1	147.7	151.4	111.3	125.2	72	82.6
High	A2BE28	Ribosomal biogenesis protein LAS1L OS=Mus musculus OX=10090 GN=Las1l PE=1 SV=1	GIVVSWLSR	1xTMTpro [N-Term]	76.5024	25	0.0001612	6.2	9.6	9.6	9.8	13.3	11.3	10.8	11.8	18.5	25.5	59.5	54	43.4	55	20.8	24.2	2	6.1	9.8	5	11.7	15.3	12.4	19.6	37.5	29.8	74.8	80.4	69.6	57.4	34.7	35	6.4	5.9	6.5	7.6	8.5	9.3	12.8	11.2	33.4	25.9
High	A2BE28	Ribosomal biogenesis protein LAS1L OS=Mus musculus OX=10090 GN=Las1l PE=1 SV=1	HKELYEK	2xTMTpro [K2; K7]; 1xTMTpro [N-Term]	36.6125	9	0.001042	42.2	46.1	65.6	70.8	76.1	87.3	76.2	87.3	110.9	118.7	192	189.3	148	196	102.7	120.7	38	46.3	48.6	59.1	73	95.6	101.4	113.1	195.8	181.7	386	347.2	344	300.6	179.4	186.1	104.6	103.6	101.8	116.4	141.6	134.9	148.1	178.8	224.4	225.8
High	A2BE28	Ribosomal biogenesis protein LAS1L OS=Mus musculus OX=10090 GN=Las1l PE=1 SV=1	LGNELPLAVASTADLVR	1xTMTpro [N-Term]	89.8407	67	8.838e-06	64	82.5	81.6	107.2	82.8	101	71.1	88.4	86.9	88.5	131.7	129.3	134.7	161.3	97	104.6	71.9	74.8	77.1	92	65.7	92.3	81.7	79.7	90.6	79.7	151.7	139.1	145.3	140.3	99.4	99.5
High	A2BE28	Ribosomal biogenesis protein LAS1L OS=Mus musculus OX=10090 GN=Las1l PE=1 SV=1	LIDAAGTLGTDELR	1xTMTpro [N-Term]	70.5391	50	8.838e-06	56.9	81.1	80.5	95.4	85.1	87.1	59	72.3	71.1	86.5	114.8	120.4	97.5	113.8	104	84.7	80.3	116.9	105.3	111.9	96.6	106.9	91.7	92.5	98.9	96.4	151.1	150.3	136.7	104.9	127.3	123.6	53.2	52.4	37.2	47.5	44.1	40.6	40.6	50	63.4	67.1
High	A2BE28	Ribosomal biogenesis protein LAS1L OS=Mus musculus OX=10090 GN=Las1l PE=1 SV=1	LLYGMALVR	1xTMTpro [N-Term]	81.7186	32	0.0001094	19.4	41.4	48.4	61.4	30.7	51.3	22.7	26	51.8	55.9	127.9	126.6	86.8	102.5	56.7	59.6	35.9	46.9	48.6	44.3	46.6	55.6	54.3	46.3	75.5	69.1	150.2	157.2	117.3	99.4	79.2	79.6
High	A2BE28	Ribosomal biogenesis protein LAS1L OS=Mus musculus OX=10090 GN=Las1l PE=1 SV=1	RGCYFVLNWLQK	1xCarbamidomethyl [C3]; 1xTMTpro [K12]; 1xTMTpro [N-Term]	83.7786	31	8.838e-06	39.5	46.4	47.4	49.8	36	47	43.3	40.2	54.2	58.3	129.1	136.3	90.9	118.2	75.6	67.9	19.6	20.5	25.5	26.6	19.5	32.9	22.9	32	40	39.8	83.8	97.8	77.2	76.6	46.2	46.2
High	A2BE28	Ribosomal biogenesis protein LAS1L OS=Mus musculus OX=10090 GN=Las1l PE=1 SV=1	VQCILEELK	1xCarbamidomethyl [C3]; 1xTMTpro [K9]; 1xTMTpro [N-Term]	88.244	50	8.838e-06	9.5	12.9	16.1	19.3	24.2	30.6	26.7	24	62.3	55.1	172.9	177.2	128.1	164.3	65.5	73.8	20.8	33.2	31.2	32	27.9	56.3	51	50.9	112.5	93.2	256.3	260	220.8	211.5	115.6	115.4	50.1	53.4	48.1	43.9	67.2	48.5	62	74.8	174.6	158
High	A2CG49	Kalirin OS=Mus musculus OX=10090 GN=Kalrn PE=1 SV=1	AEALLQAGHYDADAIR	1xTMTpro [N-Term]	59.5023	102	8.838e-06	193.7	211.3	200.7	231.7	157	173.9	110.6	134.2	97.8	127.8	188.8	164.2	168.7	190.4	185.4	184.6	229.1	268.1	215.4	241.7	194.4	242.8	185.6	199.5	157.9	190.1	190.1	219.3	183.5	195.8	231.1	237.3	220.2	196	175	182	160.2	137.3	123.9	134.6	136.3	135.8
High	A2CG49	Kalirin OS=Mus musculus OX=10090 GN=Kalrn PE=1 SV=1	AEALLQAGHYDADAIRECAEK	1xCarbamidomethyl [C18]; 1xTMTpro [K21]; 1xTMTpro [N-Term]	62.5529	31	8.838e-06																	259	216.1	288.9	189.6	195.2	165.6	173.7	144.1	136.5	95.8	124.9	125.3	144.7	127.4	179.6	187
High	A2CG49	Kalirin OS=Mus musculus OX=10090 GN=Kalrn PE=1 SV=1	AEQFLSGVDAWCK	1xCarbamidomethyl [C12]; 1xTMTpro [K13]; 1xTMTpro [N-Term]	78.7285	71	8.838e-06																																	357.7	328.5	262.3	270.7	206.2	196.7	174.6	177.7	168.6	176.3
High	A2CG49	Kalirin OS=Mus musculus OX=10090 GN=Kalrn PE=1 SV=1	AILSELLQR	1xTMTpro [N-Term]	82.3679	37	2.218e-05	432.9	476.5	507.1	548.7	356.3	389.7	258.6	269.8	236.1	207.6	282.3	257.3	278.6	329.5	340.1	333	163.4	154.8	157.2	150.2	121.7	123.1	107.1	101.1	104.2	80.8	96.4	102.7	119.5	109.8	123.5	127.8	504	478	402.4	375.3	307	257.8	221.9	259.6	210.8	243.3
High	A2CG49	Kalirin OS=Mus musculus OX=10090 GN=Kalrn PE=1 SV=1	ALGVNTEDNKDLELDIIPASLSDR	1xTMTpro [K10]; 1xTMTpro [N-Term]	82.2483	48	8.838e-06																																	150.9	131.5	137	125	115	89.7	95.4	107.9	100.6	98.6
High	A2CG49	Kalirin OS=Mus musculus OX=10090 GN=Kalrn PE=1 SV=1	APVEELDR	1xTMTpro [N-Term]	41.9067	14	0.0003339	141.8	117.4	102.5	130.1	79.5	72.6	67.3	79.5	60.4	69.3	77	70.3	73.9	81.5	87.4	95	167.4	180.5	150.9	162.3	128.9	156	108.7	98.1	106.4	103.4	105.5	135.6	107.8	131.9	142.7	127.8	178.3	117.8	135.4	135.4	124.1	98.8	80.3	93.8	111.4	89.6
High	A2CG49	Kalirin OS=Mus musculus OX=10090 GN=Kalrn PE=1 SV=1	APVEELDREGQR	1xTMTpro [N-Term]	37.6706	18	8.838e-06	57	64.8	64.5	68.4	53.6	51.6	34.7	34.7	26.3	37	39.4	37.2	47.2	36.5	50.1	49.3	180	177.5	190.4	138.8	135.2	104.3	109.3	86.7	89.3	63.1	70.5	86.2	88.3	89.7	112.5	134.2	228.6	197	168.5	174.8	114.3	90.8	89	93.2	78.6	96.6
High	A2CG49	Kalirin OS=Mus musculus OX=10090 GN=Kalrn PE=1 SV=1	ASDVLPILK	1xTMTpro [K9]; 1xTMTpro [N-Term]	74.7534	30	2.218e-05																	68	67	71.3	59.2	50.7	47.8	43	31.3	27.9	26.8	37.1	34.1	36.4	39.5	46	55.6	337.1	287.5	232.4	218.5	173.6	147.2	134.7	136.3	127.3	129.8
High	A2CG49	Kalirin OS=Mus musculus OX=10090 GN=Kalrn PE=1 SV=1	AVELMCLVPK	1xCarbamidomethyl [C6]; 1xTMTpro [K10]; 1xTMTpro [N-Term]	83.8785	41	3.865e-05																	88.6	105.5	112.8	118	94	119.5	78.9	103.4	70.7	73.1	58.3	73.4	63.6	68.7	84.3	97.6
High	A2CG49	Kalirin OS=Mus musculus OX=10090 GN=Kalrn PE=1 SV=1	AVHQVLDVVHEVLHHQR	1xTMTpro [N-Term]	67.97	39	8.838e-06																	26.1	26.9	26.2	28.3	24.4	21.3	17.8	13.4	14.8	17.1	24.8	24.8	30.4	33.3	27.9	21.7
High	A2CG49	Kalirin OS=Mus musculus OX=10090 GN=Kalrn PE=1 SV=1	CSDGFSGR	1xCarbamidomethyl [C1]; 1xTMTpro [N-Term]	24.6958	19	0.0004741																	194.8	181.2	167.9	174.1	136.3	137.8	109.3	114.7	108.7	87.5	95.4	87.1	86	97.7	122.7	122.9	40.7	38.9	41.3	34.4	19.3	19.9	21.2	22.1	20.2	20.1
High	A2CG49	Kalirin OS=Mus musculus OX=10090 GN=Kalrn PE=1 SV=1	DANHEINEEKR	1xTMTpro [K10]; 1xTMTpro [N-Term]	25.7551	14	0.0005055	210.6	211.8	209	246.5	136.1	166.5	114.2	106.4	102	91.1	139.5	130.4	132.5	147.4	163	160.7
High	A2CG49	Kalirin OS=Mus musculus OX=10090 GN=Kalrn PE=1 SV=1	DFFLAELEK	1xTMTpro [K9]; 1xTMTpro [N-Term]	86.9589	33	0.0003601																	29.8	42	28.6	42.9	28	33.4	22.6	26.9	21.7	31.5	13.5	24.2	19.5	20.2	27.9	29.1
High	A2CG49	Kalirin OS=Mus musculus OX=10090 GN=Kalrn PE=1 SV=1	DFLNALQSPIEYQR	1xTMTpro [N-Term]	79.943	29	8.838e-06	182.5	206.8	216.4	282.2	235.4	286	205.9	258.6	216.4	248.2	187.9	199.2	149.3	182.9	230.7	245.8																	189.5	161.2	143.3	156.4	153.2	123.2	114	151.2	122.4	117.2
High	A2CG49	Kalirin OS=Mus musculus OX=10090 GN=Kalrn PE=1 SV=1	DSAMSNNK	1xTMTpro [K8]; 1xTMTpro [N-Term]	29.7726	20	0.0009871																																	137.5	117.7	114.9	100.4	92.2	75.5	71.2	83.5	88.5	78.8
High	A2CG49	Kalirin OS=Mus musculus OX=10090 GN=Kalrn PE=1 SV=1	FALWSGR	1xTMTpro [N-Term]	63.9267	10	0.001277	251.2	252.2	271.1	296.6	193	197.2	132.5	134.5	123.9	118.1	145.7	128.5	143.3	142.4	178.3	183.8	210.8	197.5	192	169.4	155.3	159.8	129.4	114.2	106.8	81.5	83	79.6	86.6	99	134.2	144.9	363.5	316.8	259.9	238.7	222.6	168.2	159.9	171.3	146.2	136.7
High	A2CG49	Kalirin OS=Mus musculus OX=10090 GN=Kalrn PE=1 SV=1	GALKEPIQLPK	2xTMTpro [K4; K11]; 1xTMTpro [N-Term]	62.8698	13	8.838e-06	445.2	481.6	573.8	670.2	443.6	484.1	302.7	335.7	289.1	257	334.2	307.6	330.5	371.5	405.4	406.1	491.1	411.5	494.6	419	382.3	346.3	359.7	302.7	302.3	212.2	244	255.6	280	282.7	376.4	395.5	754.3	704.8	597.3	535.1	457.2	396.7	360.8	408.8	346.8	353.8
High	A2CG49	Kalirin OS=Mus musculus OX=10090 GN=Kalrn PE=1 SV=1	GVPEDMR	1xTMTpro [N-Term]	28.4774	14	0.00321	10.6	13.9	14	17.6	14.5	10.3	11.8	11.2	5.9	10	9.3	8.1	9.3	11.2	13.2	10.8	16.2	14.2	12.6	15.6	15.8	16.1	12.6	11.4	10.9	9.7	9.1	12.3	8.1	8.4	8.4	9.4
High	A2CG49	Kalirin OS=Mus musculus OX=10090 GN=Kalrn PE=1 SV=1	HQNDVRPIPNVK	1xTMTpro [K12]; 1xTMTpro [N-Term]	37.7403	11	0.0001194																																	150.1	149	135.2	128	127.9	106	106.8	107.9	86.9	94.2
High	A2CG49	Kalirin OS=Mus musculus OX=10090 GN=Kalrn PE=1 SV=1	IFDNDPTQDEMSSLLAAR	1xTMTpro [N-Term]	80.8678	98	8.838e-06	36.1	40.6	38.7	41.7	33.1	41.4	23.4	41.6	22.9	25.3	24.3	25.2	23.8	27.2	29.7	31.6																	86.3	96.7	68.4	67.3	60.4	68.1	76	78.4	84.7	88.7
High	A2CG49	Kalirin OS=Mus musculus OX=10090 GN=Kalrn PE=1 SV=1	IMSVASR	1xTMTpro [N-Term]	44.6839	4	0.001934	383.3	404.4	389.2	425.9	271.7	296.4	176.8	195.1	176.2	165.5	218.3	186	211.2	233.2	257.5	279	257.4	240.2	252.8	233.8	189.2	207.3	167.7	169.4	169.8	123.4	126.4	130.1	160.4	163	195.5	194.8	578.2	546.1	427.7	418	317.2	261.7	219	252.8	213	206.3
High	A2CG49	Kalirin OS=Mus musculus OX=10090 GN=Kalrn PE=1 SV=1	KEFPVDVEGSR	1xTMTpro [K1]; 1xTMTpro [N-Term]	50.7155	8	5.606e-05																	704.1	643.9	667.4	628.6	517.7	491.4	430.9	362	367	313	335.7	341.3	349.2	349	503.4	519.9	799.4	693.5	621.7	602.4	492.5	410.7	355.9	385.5	364.2	366.2
High	A2CG49	Kalirin OS=Mus musculus OX=10090 GN=Kalrn PE=1 SV=1	LACFIER	1xCarbamidomethyl [C3]; 1xTMTpro [N-Term]	64.2403	17	0.0009002	81.7	84.8	96.7	112.6	73.9	98.2	66.7	73.4	52.1	58.6	64.1	63.1	80.5	81	72.4	81.5	32.2	41.5	35.2	43.1	36.9	40.7	32.3	42.7	33.1	30.6	23.8	31.2	30.3	36.1	37	35	263.7	239.8	203	217.5	177.8	156.5	126.1	167.7	129.1	140.7
High	A2CG49	Kalirin OS=Mus musculus OX=10090 GN=Kalrn PE=1 SV=1	LAQLFIK	1xTMTpro [K7]; 1xTMTpro [N-Term]	84.0057	33	0.0001194	109.7	123.2	112.2	125.8	108.3	113.7	74.7	102.5	68.3	78.4	69.9	68.1	74	89.2	105.6	102.8	133.3	183.2	129.7	163.3	127.7	138.8	96	124.8	77.6	100.3	67.9	87.4	86.1	103	106.1	118.3	187.6	203.7	172.6	190.1	157.5	131.9	123.6	142	109.6	98.7
High	A2CG49	Kalirin OS=Mus musculus OX=10090 GN=Kalrn PE=1 SV=1	LDIFLQLR	1xTMTpro [N-Term]	91.7728	7	0.003936																	46	42.7	42	35.6	36.6	36.8	30.2	26.6	29	35.5	26.2	34.1	23.3	21.1	35.9	41.8
High	A2CG49	Kalirin OS=Mus musculus OX=10090 GN=Kalrn PE=1 SV=1	LEDLQEMLAR	1xTMTpro [N-Term]	80.2533	57	2.785e-05	24.5	30.1	31.2	35.6	25.6	29	18.4	16.5	16.5	16.5	16.9	16.1	18.9	22.8	27.7	19.1	54.8	53.5	53.4	47.1	46.7	41.9	40.8	34.2	38	28.6	27.4	33	32.6	42.1	39.2	53	48.9	49.1	35.5	38.3	34.6	30.5	26.7	22.4	20.7	22
High	A2CG49	Kalirin OS=Mus musculus OX=10090 GN=Kalrn PE=1 SV=1	LEQCLQLR	1xCarbamidomethyl [C4]; 1xTMTpro [N-Term]	55.4772	39	0.0006416	43.4	46	49.1	60.3	37.5	40.9	39.7	33.4	44.1	40.8	59.5	50	31.5	38.9	44.9	46.8																	695.8	563.9	563.9	595.7	502.3	425.3	405.7	467.8	503	456.5
High	A2CG49	Kalirin OS=Mus musculus OX=10090 GN=Kalrn PE=1 SV=1	LQGFEGTLTAQGK	1xTMTpro [K13]; 1xTMTpro [N-Term]	65.3763	45	8.838e-06																	168.1	187.3	179.9	199.3	161	204.8	162.1	184.1	131.1	144.4	113.3	143.1	119.9	146.8	166.4	176.5
High	A2CG49	Kalirin OS=Mus musculus OX=10090 GN=Kalrn PE=1 SV=1	LTLEGGSYR	1xTMTpro [N-Term]	48.8408	26	0.0001526	20.6	20.5	22	24.1	20.9	22.3	13	18.8	15.9	20.3	17.5	17.4	18.5	19.2	19.7	19.9	71.8	94.9	69.4	91.9	70	85.5	53.6	65.7	46.9	56.5	40.1	58.7	49.8	69.1	58	63.9
High	A2CG49	Kalirin OS=Mus musculus OX=10090 GN=Kalrn PE=1 SV=1	LTLSDFLIKPIQR	1xTMTpro [K9]; 1xTMTpro [N-Term]	89.6248	32	8.838e-06	191.4	190.3	171.4	210	126.2	154.1	87.1	107.1	76.3	79.9	98.4	103.7	108.8	128.1	141	140.3	200.9	241.7	200.6	228.6	162.3	217.2	162.4	181	140.2	152.5	114.5	142.1	127.1	146.7	162.4	170.6
High	A2CG49	Kalirin OS=Mus musculus OX=10090 GN=Kalrn PE=1 SV=1	NCIPGSADFQSLVPK	1xCarbamidomethyl [C2]; 1xTMTpro [K15]; 1xTMTpro [N-Term]	73.6661	46	8.838e-06																																	276.9	264.7	218.1	232.6	192.4	179	161.4	201.8	164.7	153.9
High	A2CG49	Kalirin OS=Mus musculus OX=10090 GN=Kalrn PE=1 SV=1	RLEQCLQLR	1xCarbamidomethyl [C5]; 1xTMTpro [N-Term]	45.7774	40	0.0003845	329.3	345.1	353	396.5	263.7	287.2	182.3	207.8	163.3	152.8	193.9	180.9	210	235	249.2	271	243	220.8	225.9	200.3	167.3	164.5	147.8	117.3	125.7	104	118.1	118.3	128.8	134	164	158.2	386.6	331.9	295.9	284.8	217	187.4	166.1	180.4	152.9	168.2
High	A2CG49	Kalirin OS=Mus musculus OX=10090 GN=Kalrn PE=1 SV=1	RLIDEHTQLK	1xTMTpro [K10]; 1xTMTpro [N-Term]	42.5824	2	0.001119																																	198.2	175.2	143.7	147.8	126.5	87.3	103.1	99.9	102.1	101.4
High	A2CG49	Kalirin OS=Mus musculus OX=10090 GN=Kalrn PE=1 SV=1	SFAAALDER	1xTMTpro [N-Term]	53.2801	41	9.049e-05	29.7	36.7	30.2	30.1	22.5	24.5	11.9	19.8	16.3	10	15.9	11.5	19.9	14.4	26.7	23.9	52.2	45.7	50	35.7	29.8	24.7	29.8	21.4	18.7	14.5	23.5	19.7	23.2	31.3	33	32.4	71.5	80.8	59.4	59.7	42.4	35.3	29.2	29.1	35.1	26.5
High	A2CG49	Kalirin OS=Mus musculus OX=10090 GN=Kalrn PE=1 SV=1	TPSSDNK	1xTMTpro [K7]; 1xTMTpro [N-Term]	26.0122	6	0.003784	335.3	363.2	364.9	437.1	291.6	321.9	210.6	248.1	171.5	197.9	240.2	216.3	266	278.4	288.5	320.3
High	A2CG49	Kalirin OS=Mus musculus OX=10090 GN=Kalrn PE=1 SV=1	VAFVSGGR	1xTMTpro [N-Term]	45.4212	6	0.002083																	429.8	390.4	411.8	348.7	311.1	298.7	257.9	230.8	237.5	200.5	246	247.5	243.8	270.4	323.3	311.2
High	A2CG49	Kalirin OS=Mus musculus OX=10090 GN=Kalrn PE=1 SV=1	VAHLDIKPENLLIDLR	1xTMTpro [K7]; 1xTMTpro [N-Term]	79.9391	19	8.838e-06	110.2	138.6	133.9	177.8	111.3	126.1	81	104.9	75.6	83.7	87.9	86.7	100.8	121.7	122.7	124.6																	149.6	141	113.7	129.5	90.8	86.6	67.3	88.2	73.8	75.2
High	A2CG49	Kalirin OS=Mus musculus OX=10090 GN=Kalrn PE=1 SV=1	VALHWQQLMLK	1xTMTpro [K11]; 1xTMTpro [N-Term]	78.9179	32	8.838e-06	181.1	205.5	211	264.1	183.4	215.4	142.1	153.3	127.8	144	172.6	153.5	143.6	169.2	176.9	187.5	291.4	318.9	274	264.5	231.3	210.2	188.6	182.6	161.3	133.8	153.1	160.2	179.9	183.4	236.2	239.7	257.1	244.9	197.2	206.7	147.6	124.7	101.7	146	112	113.9
High	A2CG49	Kalirin OS=Mus musculus OX=10090 GN=Kalrn PE=1 SV=1	VLHFWTLK	1xTMTpro [K8]; 1xTMTpro [N-Term]	77.9793	18	0.0001568																	153	160.9	160.7	118.9	104.6	112.2	96.9	81.8	75.4	55.4	66.4	68.6	76.6	79.5	100	114.1	337.6	320.5	241.5	250.2	198.8	158.1	138.3	154.3	132.4	148.1
High	A2CG49	Kalirin OS=Mus musculus OX=10090 GN=Kalrn PE=1 SV=1	VQGVPAAPNRPIAQER	1xTMTpro [N-Term]	40.3747	14	2.218e-05	135.8	147.3	147.9	190.4	140.2	159.7	113.1	126.3	89.8	108.8	115	117.8	130	156.2	142.9	148	39.7	63.8	39.3	49.1	43.9	51.7	49.2	40.7	43.2	45.3	44.8	53.9	41.8	62.2	51.4	39.5	161.6	166.2	141.6	147.7	134	134.8	113	135.2	102.4	104
High	A2CG49	Kalirin OS=Mus musculus OX=10090 GN=Kalrn PE=1 SV=1	WDLIKPLLK	2xTMTpro [K5; K9]; 1xTMTpro [N-Term]	90.3029	10	0.0004495																	231.5	204.4	190.5	207.4	146.2	139	110.6	115.6	99.4	89.4	95.7	108.8	120.2	129.4	173.7	171
High	A2RSJ4	UHRF1-binding protein 1-like OS=Mus musculus OX=10090 GN=Uhrf1bp1l PE=1 SV=2	DSHLFNTGTDFKDGASSDSVVR	1xTMTpro [K12]; 1xTMTpro [N-Term]	54.5883	24	8.838e-06	83.8	95.8	109.3	128.7	108.7	123.2	93.5	106.5	94.2	109.8	139.1	128.5	145.8	161	126.1	132.1
High	A2RSJ4	UHRF1-binding protein 1-like OS=Mus musculus OX=10090 GN=Uhrf1bp1l PE=1 SV=2	EINWQMIR	1xTMTpro [N-Term]	65.1193	12	0.0005228																	107.6	151.9	123.9	151.9	129.3	160.9	137	144	126.3	119.4	137.1	168.1	167.2	191.3	142.4	141.5
High	A2RSJ4	UHRF1-binding protein 1-like OS=Mus musculus OX=10090 GN=Uhrf1bp1l PE=1 SV=2	EQLMEENECLR	1xCarbamidomethyl [C9]; 1xTMTpro [N-Term]	47.5296	7	2.218e-05	153.6	148.6	168.7	178.6	132.4	155.8	134.7	124.6	115.5	110.1	153.1	134.9	164.8	165.6	159.6	169.2
High	A2RSJ4	UHRF1-binding protein 1-like OS=Mus musculus OX=10090 GN=Uhrf1bp1l PE=1 SV=2	FVIPSEVK	1xTMTpro [K8]; 1xTMTpro [N-Term]	67.9055	19	0.001666	57.4	68	70.1	84.3	73.5	82.5	56.9	63.4	47.3	47.1	64.6	62.3	79.1	94.7	77.3	76.5																	93.1	100.4	90.6	94.7	79.9	77.8	68.9	77.7	70.7	63
High	A2RSJ4	UHRF1-binding protein 1-like OS=Mus musculus OX=10090 GN=Uhrf1bp1l PE=1 SV=2	GIDAIHSIFR	1xTMTpro [N-Term]	62.597	59	2.785e-05	52.5	55.4	57	66.4	70.5	61.6	51.1	59.2	43.1	55.8	84.3	73.6	100.7	96.5	69	80.3	60.6	97.5	63.5	99.7	68.3	97.8	71.7	80.6	55.4	79.2	69.4	101.2	93.4	145.1	81.3	73	73.2	54	60.6	69.7	68.6	60.9	52.8	58.1	57.7	57.1
High	A2RSJ4	UHRF1-binding protein 1-like OS=Mus musculus OX=10090 GN=Uhrf1bp1l PE=1 SV=2	GTSFLDYLSDK	1xTMTpro [K11]; 1xTMTpro [N-Term]	81.4559	7	0.002001																																	82.3	75.5	56.6	57.7	46.8	39.4	33.5	35.4	38.2	34.9
High	A2RSJ4	UHRF1-binding protein 1-like OS=Mus musculus OX=10090 GN=Uhrf1bp1l PE=1 SV=2	HAHEQDTK	1xTMTpro [K8]; 1xTMTpro [N-Term]	15.9317	38	8.838e-06	6.7	8	15.1	16.9	13.2	5.6	9.6	9.9	8.6	11.5	16.4	14.3	21.2	18.2	11.6	10.1																	152	149.4	71.4	92.9	83.7	111.6	51.4	126.9	95.4	98.5
High	A2RSJ4	UHRF1-binding protein 1-like OS=Mus musculus OX=10090 GN=Uhrf1bp1l PE=1 SV=2	HYLGNRPVGSDQK	1xTMTpro [K13]; 1xTMTpro [N-Term]	32.6173	2	0.003462	52.5	58.9	66.5	75.2	71	74.1	57.5	68.4	48.7	61.1	94.4	106.8	93.7	126.7	76	95.8
High	A2RSJ4	UHRF1-binding protein 1-like OS=Mus musculus OX=10090 GN=Uhrf1bp1l PE=1 SV=2	INLKDDSPR	1xTMTpro [K4]; 1xTMTpro [N-Term]	44.9132	1	0.002648																	239.5	275.8	230	255.5	211	277.3	223.4	246.9	207.3	191.9	167.6	216.8	185.2	249.9	240.4	234.3
High	A2RSJ4	UHRF1-binding protein 1-like OS=Mus musculus OX=10090 GN=Uhrf1bp1l PE=1 SV=2	LFNDFDVK	1xTMTpro [K8]; 1xTMTpro [N-Term]	77.524	24	0.001391	75	90.6	89.4	91.2	90.5	84.2	61.1	81.7	49.3	71.1	97.1	86.8	117.2	136.2	97.7	97.6																	114.9	106.2	94.7	101.1	102.6	79.6	68.1	85.3	80.9	84
High	A2RSJ4	UHRF1-binding protein 1-like OS=Mus musculus OX=10090 GN=Uhrf1bp1l PE=1 SV=2	LMSSSVVVR	1xTMTpro [N-Term]	53.8955	30	2.785e-05	72.4	81.1	79.8	89	81	109.9	68.3	91	65.9	76.6	96.4	100.5	123.5	146.8	102.1	97.7	149.6	206.6	153	204.1	155.5	226.8	145.8	205.8	130	166.9	164.4	218.6	242	324.4	167.2	189.1	168.1	154.4	142.6	154.8	160.7	139.2	123.3	148.4	129.3	138
High	A2RSJ4	UHRF1-binding protein 1-like OS=Mus musculus OX=10090 GN=Uhrf1bp1l PE=1 SV=2	NLSPDKINLSTLKGEGELK	3xTMTpro [K6; K13; K19]; 1xTMTpro [N-Term]	69.6058	10	0.0002127	54.9	60.1	74.2	100.8	70	112.3	69.6	85.1	67.6	51.8	80.3	78.8	92.5	114.1	76.5	92.8
High	A2RSJ4	UHRF1-binding protein 1-like OS=Mus musculus OX=10090 GN=Uhrf1bp1l PE=1 SV=2	SCDSFNLLHPIFQR	1xCarbamidomethyl [C2]; 1xTMTpro [N-Term]	71.5624	45	8.838e-06																																	128.1	141.1	106.5	106.1	97.7	95	103.4	103.6	108.9	117.3
High	A2RSJ4	UHRF1-binding protein 1-like OS=Mus musculus OX=10090 GN=Uhrf1bp1l PE=1 SV=2	SLSEAIEK	1xTMTpro [K8]; 1xTMTpro [N-Term]	52.53	33	5.039e-05	226.5	268.8	265.4	306	268.4	293.7	204.8	247.5	212.2	210.7	302.6	291.3	345.1	381.2	297.7	314.7
High	A2RSJ4	UHRF1-binding protein 1-like OS=Mus musculus OX=10090 GN=Uhrf1bp1l PE=1 SV=2	SMSVDLSHAPLKDPLLFK	2xTMTpro [K12; K18]; 1xTMTpro [N-Term]	81.2073	26	8.838e-06	42.1	45.5	48.6	75.7	43.9	56.9	37	50.1	40.9	37.6	60.7	56.5	68.6	87.7	57.7	53
High	A2RSJ4	UHRF1-binding protein 1-like OS=Mus musculus OX=10090 GN=Uhrf1bp1l PE=1 SV=2	SQTSLSAK	1xTMTpro [K8]; 1xTMTpro [N-Term]	35.1804	39	2.218e-05																	102.1	148.5	117	154.8	119.3	166.9	133.7	153.1	117.1	121	117.7	159.6	145.9	211.3	134.2	130.3
High	A2RSJ4	UHRF1-binding protein 1-like OS=Mus musculus OX=10090 GN=Uhrf1bp1l PE=1 SV=2	SSPEISLR	1xTMTpro [N-Term]	42.9615	17	0.001147																	188.3	252.6	214.4	257.1	208.5	317.9	233.9	301.1	244.3	267.9	310.1	388.6	360.9	462.1	280.1	282.3
High	A2RSJ4	UHRF1-binding protein 1-like OS=Mus musculus OX=10090 GN=Uhrf1bp1l PE=1 SV=2	TQPICLSLDK	1xCarbamidomethyl [C5]; 1xTMTpro [K10]; 1xTMTpro [N-Term]	64.245	22	0.000487																																	438.8	437.3	222.1	270.3	178.7	146.4	116.6	147.1	125.4	122.4
High	A2RSJ4	UHRF1-binding protein 1-like OS=Mus musculus OX=10090 GN=Uhrf1bp1l PE=1 SV=2	VDGLMLK	1xTMTpro [K7]; 1xTMTpro [N-Term]	63.7525	19	0.002572																	135.9	180	137.5	180.8	134	180.6	157.7	170.5	149.9	147.9	152.6	191.9	161	206.2	152.4	158.6
High	A2RSQ0	DENN domain-containing protein 5B OS=Mus musculus OX=10090 GN=Dennd5b PE=1 SV=2	DHLLPQWIPLLAECPAITR	1xCarbamidomethyl [C14]; 1xTMTpro [N-Term]	96.0647	51	8.838e-06																																	11.1	11.3	8.7	9.6	12	8.2	11.8	7.9	12.1	9
High	A2RSQ0	DENN domain-containing protein 5B OS=Mus musculus OX=10090 GN=Dennd5b PE=1 SV=2	EAAQSIEQR	1xTMTpro [N-Term]	26.8721	28	2.218e-05	99.3	119.1	128.6	140.6	140	156.5	124.4	146	115.1	139	186.6	190.3	204.1	250.5	152.6	165.5	125.5	138.6	133.5	158.3	162.2	178.1	191.7	191.4	168.5	183.4	196.5	243.7	215.9	265.9	180.8	191.2	143.1	118.3	130.9	125.9	144.6	120.5	137.5	148.6	164.3	149.8
High	A2RSQ0	DENN domain-containing protein 5B OS=Mus musculus OX=10090 GN=Dennd5b PE=1 SV=2	FYGVYEPVICQRPGPNELPLSDYPLR	1xCarbamidomethyl [C10]; 1xTMTpro [N-Term]	84.916	23	8.838e-06	9.4	9.2	9.3	10.9	12.1	9.3	6.7	10.9	11.5	6.8	14.9	12.6	14.7	18.1	8.4	10.5																	19.2	18.2	20.2	14.4	20.3		18.1	17.6	19.3	24.5
High	A2RSQ0	DENN domain-containing protein 5B OS=Mus musculus OX=10090 GN=Dennd5b PE=1 SV=2	GSETIAR	1xTMTpro [N-Term]	21.9594	10	0.001949																	240.7	307.9	269.2	298.8	264.9	348.1	305.2	302	287.9	288	319.2	390.4	312.2	344	304.5	317.5	332.7	292.1	289.1	285.8	322.3	250.3	300.3	312.7	349.3	331.6
High	A2RSQ0	DENN domain-containing protein 5B OS=Mus musculus OX=10090 GN=Dennd5b PE=1 SV=2	GVDDGSLER	1xTMTpro [N-Term]	30.8479	37	3.865e-05																	118.2	141	151.3	167.6	185.2	220.4	229.6	210	239.6	214.6	263.4	311.3	287.6	306.1	217.9	208.6
High	A2RSQ0	DENN domain-containing protein 5B OS=Mus musculus OX=10090 GN=Dennd5b PE=1 SV=2	IMSQWEEKDPLLR	1xTMTpro [K8]; 1xTMTpro [N-Term]	76.2775	12	8.838e-06																	109	133.4	130.4	156.8	138.2	176.3	148.3	162.5	157.2	144.1	136.1	164.2	148.1	157	144.2	166.1	206.7	192.9	183.3	187.6	202.5	168.8	202.8	210.5	244.8	218
High	A2RSQ0	DENN domain-containing protein 5B OS=Mus musculus OX=10090 GN=Dennd5b PE=1 SV=2	MYEENALLR	1xTMTpro [N-Term]	55.7444	17	6.035e-05	78.1	101.6	110.7	128	131.3	160.9	119.4	146.6	114.2	128.1	133.4	150.3	143.5	157.6	129.8	131
High	A2RSQ0	DENN domain-containing protein 5B OS=Mus musculus OX=10090 GN=Dennd5b PE=1 SV=2	SVIIPIKK	2xTMTpro [K7; K8]; 1xTMTpro [N-Term]	64.4084	3	0.001589	96.9	123.6	149.6	169.7	182.1	218.3	161	193.9	151.5	173.8	218.6	250.2	270.2	342.1	185.1	200.5
High	A2RSQ0	DENN domain-containing protein 5B OS=Mus musculus OX=10090 GN=Dennd5b PE=1 SV=2	WLVDCVMVR	1xCarbamidomethyl [C5]; 1xTMTpro [N-Term]	77.7311	31	2.785e-05	68.4	70	74.2	94.2	101.7	111.3	86.8	98.4	83.7	90.7	105.3	116.3	122	157.9	90.3	103.5																	100.5	112.9	101.1	90.6	117.4	89.1	98.4	92.7	115	115
High	A2RSX7	tRNA wybutosine-synthesizing protein 5 OS=Mus musculus OX=10090 GN=Tyw5 PE=2 SV=2	AVQILDR	1xTMTpro [N-Term]	48.9889	22	0.0004495	206.5	216.1	201	233.2	179.3	195.8	144.1	152.9	117	114.5	84	82.3	98.4	115.8	156	162.9	266.2	321.8	232.6	228.7	200	189.9	179.5	178.4	138.4	105.8	81.4	80.9	120.1	111	173.1	182.6	370.3	382.3	312.2	297.5	266.4	236.7	208.4	268	197.6	190.7
High	A2RSX7	tRNA wybutosine-synthesizing protein 5 OS=Mus musculus OX=10090 GN=Tyw5 PE=2 SV=2	EEQFFSSVFR	1xTMTpro [N-Term]	76.6667	25	5.039e-05	113.2	119.9	125.8	138.7	116.3	132.5	83	108.9	86	75.9	77.2	78.1	87.6	117	106.3	112																	164.1	175.9	141	167.1	143.6	124.7	105.1	124.8	91	85.3
High	A2RSY6	TRMT1-like protein OS=Mus musculus OX=10090 GN=Trmt1l PE=1 SV=1	AEASGCR	1xCarbamidomethyl [C6]; 1xTMTpro [N-Term]	14.5957	13	0.0005984	25	29.1	24.2	30.8	31.4	27.6	32.2	37.6	38.2	48.4	151.1	135.7	177.3	217.1	78.4	84.6	10.8	16.9	17.3	16	17	18	28	22.1	32.1	29.4	84.4	99	105.5	119.5	52.3	52.1	35.1	33.3	37.3	35.5	46.8	42.9	36.3	51.5	78.2	65.5
High	A2RSY6	TRMT1-like protein OS=Mus musculus OX=10090 GN=Trmt1l PE=1 SV=1	ISVEFEGYR	1xTMTpro [N-Term]	60.6694	26	2.785e-05				4	3.6	5.2	4.3	4.7	11.8	7.1	29.3	29.8	48.1	48.2	19.5	19.3	12.6	9	11.3	22.6	27.3	28.2	41.4	41.5	67.9	57.4	218	230	303.8	293.4	100	103.5	3.6	4.1	4.6	5.3	9	5.9	9.7	10.1	14.9	15
High	A2RSY6	TRMT1-like protein OS=Mus musculus OX=10090 GN=Trmt1l PE=1 SV=1	IVVAAVAR	1xTMTpro [N-Term]	54.0753	19	0.002286	64.8	66.7	75.5	98.6	95.5	104.8	90.6	105.4	116.4	103.3	251.2	245.3	286.4	314	146	160.9																	98.1	95.5	90.2	114.5	133.1	122.9	140.5	155.9	215.5	207.3
High	A2RSY6	TRMT1-like protein OS=Mus musculus OX=10090 GN=Trmt1l PE=1 SV=1	RTDMLGHVK	1xTMTpro [K9]; 1xTMTpro [N-Term]	38.1566	7	0.004549																																	53.2	57.8	51.3	66	73.6	63.1	84.2	94.4	125.1	116.1
High	A2RSY6	TRMT1-like protein OS=Mus musculus OX=10090 GN=Trmt1l PE=1 SV=1	TDAPLMQFK	1xTMTpro [K9]; 1xTMTpro [N-Term]	66.8433	27	0.0001842																																	24.4	17.3	22.8	19.1	25.9	25	20.2	32.9	41.1	36.6
High	A2RSY6	TRMT1-like protein OS=Mus musculus OX=10090 GN=Trmt1l PE=1 SV=1	VTINDLNENSVTLIQK	1xTMTpro [K16]; 1xTMTpro [N-Term]	73.7985	33	2.218e-05																																	46.1	48	35.7	36.7	34.9	30.6	37.3	32.3	38	42.1
High	A2RSY6	TRMT1-like protein OS=Mus musculus OX=10090 GN=Trmt1l PE=1 SV=1	VVVDSEEKEEGDALEDDGTLGDIQVTR	1xTMTpro [K8]; 1xTMTpro [N-Term]	64.0051	50	8.838e-06																																	74.3	71.1	73.1	70	82.5	66.9	78.2	81.7	99.8	77.4
High	A2RT60	Serine protease HTRA4 OS=Mus musculus OX=10090 GN=Htra4 PE=2 SV=1	GACEEAGTTR	1xCarbamidomethyl [C3]; 1xTMTpro [N-Term]	17.6903	32	8.042e-05																	4.4	61.5	5.1	57.7	7.5	75.3	10	87.9	13.5	92.6	9.3	62.9	9.2	41.7	20.1	16.1
High	A2RT62	F-box/LRR-repeat protein 16 OS=Mus musculus OX=10090 GN=Fbxl16 PE=1 SV=1	CILAQVCK	2xCarbamidomethyl [C1; C7]; 1xTMTpro [K8]; 1xTMTpro [N-Term]	57.8315	35	2.218e-05	82.6	87.2	82.9	107.4	100.8	125.6	80.5	114.4	59	60.6	57.9	38.7	54.7	70.4	87.9	75.8	167.8	150.7	172.9	168.8	170.5	173	184.8	181.1	159	109.8	91.6	81.8	121.4	112.6	157.1	151.4	221.2	256.5	221	226.1	245.1	216.3	215.2	285	161.6	182.3
High	A2RT62	F-box/LRR-repeat protein 16 OS=Mus musculus OX=10090 GN=Fbxl16 PE=1 SV=1	EFVNLQGFAAR	1xTMTpro [N-Term]	68.4761	48	8.838e-06																	293.5	311.1	262.7	286.9	284.1	266.4	273.3	238.7	215.7	170.3	162.7	172	228.8	208.2	252.2	262.5	90.5	87.1	87.9	82	80.5	76.5	68.2	81.9	72.3	73.4
High	A2RT62	F-box/LRR-repeat protein 16 OS=Mus musculus OX=10090 GN=Fbxl16 PE=1 SV=1	ELYNVLPGGEK	1xTMTpro [K11]; 1xTMTpro [N-Term]	66.6462	26	6.035e-05	167.5	179	178.6	204.6	200.7	200.9	149.6	178.9	120.1	152.6	120.9	117.5	107.6	130.2	168.1	177.9																	178.4	176.8	173.8	172.3	194.4	161.4	143.6	174.9	112.8	125.7
High	A2RT62	F-box/LRR-repeat protein 16 OS=Mus musculus OX=10090 GN=Fbxl16 PE=1 SV=1	ELYNVLPGGEKEFVNLQGFAAR	1xTMTpro [K11]; 1xTMTpro [N-Term]	85.3575	40	8.838e-06	121.3	143	158.9	182.5	171.2	193.5	137.2	149.7	88.9	88.7	69.3	75.5	82.4	103.9	119.7	135.2	230.8	184.9	265.2	199.7	228.9	269.7	317.5	257.3	202.8	142.6	123.8	117.2	158.1	134.4	222.2	226.7	210.7	202.8	176.9	179.4	187.6	171.5	179.6	223.9	132.5	161
High	A2RT62	F-box/LRR-repeat protein 16 OS=Mus musculus OX=10090 GN=Fbxl16 PE=1 SV=1	FWAGLTPVLHAK	1xTMTpro [K12]; 1xTMTpro [N-Term]	83.0236	52	8.838e-06	137	160	166.5	204.1	206.5	211.3	152.9	197.3	120.3	118.8	98.1	96.5	107	135.6	148.5	158.7	199.7	187.8	198.1	208	210.4	233.5	223.7	210.5	167	131.3	102.5	94.8	121.9	128	185.2	186.3	467.8	476.2	395.2	407.7	427.9	390.3	396	508.7	349.5	372.5
High	A2RT62	F-box/LRR-repeat protein 16 OS=Mus musculus OX=10090 GN=Fbxl16 PE=1 SV=1	ITDMALEYVACDLHR	1xCarbamidomethyl [C11]; 1xTMTpro [N-Term]	84.3015	60	8.838e-06	27.7	29.7	32.8	37.3	33.6	37.9	32.3	37.7	43.5	47.1	39.2	37.1	26.4	24.4	37.4	40.4	41.1	37.6	38	44.8	47.6	40.4	49	44	61.7	56.9	50.1	51	32	29.8	41.2	48.8	56.3	49.5	55.2	52.9	59.2	51.6	46.5	48.5	46.3	56.9
High	A2RT62	F-box/LRR-repeat protein 16 OS=Mus musculus OX=10090 GN=Fbxl16 PE=1 SV=1	ITDTGLSYLSTMSSLR	1xTMTpro [N-Term]	83.0347	76	8.838e-06	44.5	55.4	50.3	55	55.9	57.3	42.7	48.4	35.3	40.5	32.4	21.7	29.5	36.7	51.2	44.7	47.6	61.7	63.2	63.9	54.2	67.9	64	60.1	46.7	35.6	33.6	34.4	43.5	40.7	51.2	55.9	64.6	71.2	57.8	53.7	60.2	52.5	57	62.4	40	44.2
High	A2RT62	F-box/LRR-repeat protein 16 OS=Mus musculus OX=10090 GN=Fbxl16 PE=1 SV=1	LEELVLDR	1xTMTpro [N-Term]	69.8993	38	0.001023	403.7	408.1	394.6	418.4	451.3	423.9	345.4	368.6	221.8	267.8	273.2	229.3	283.4	295.6	340.3	370.3
High	A2RT62	F-box/LRR-repeat protein 16 OS=Mus musculus OX=10090 GN=Fbxl16 PE=1 SV=1	LELSGCNDFTEAGLWSSLSAR	1xCarbamidomethyl [C6]; 1xTMTpro [N-Term]	89.1961	63	8.838e-06	214.4	204.1	216.6	238.9	178.1	192.4	173.4	161.6	160	156.9	175	153.6	145.2	158.5	198.7	204.6	109.2	119.9	113.8	120.8	93.4	112.5	86.1	94.9	95.9	85	82.6	92	76	89.7	101.8	91.8	234.9	213.5	200.9	188.4	166.6	127.9	149.3	135.5	150.9	127.8
High	A2RT62	F-box/LRR-repeat protein 16 OS=Mus musculus OX=10090 GN=Fbxl16 PE=1 SV=1	LPGQPNGLGAASITK	1xDeamidated [N6]; 1xTMTpro [K15]; 1xTMTpro [N-Term]	64.5254	34	9.049e-05																																	89	70.5	86.6	87.6	81.7	77.6	72.9	88	69.9	63.4
High	A2RT62	F-box/LRR-repeat protein 16 OS=Mus musculus OX=10090 GN=Fbxl16 PE=1 SV=1	NRPCQPPPPPTLPPPSLATPLSR	1xCarbamidomethyl [C4]; 1xTMTpro [N-Term]	63.572	25	8.838e-06	75.5	83.6	96.9	108	98.7	113.8	85.7	99.2	72.9	88	65.3	70.9	50.5	70.8	85.7	88.5
High	A2RT62	F-box/LRR-repeat protein 16 OS=Mus musculus OX=10090 GN=Fbxl16 PE=1 SV=1	SLDLSWCPR	1xCarbamidomethyl [C7]; 1xTMTpro [N-Term]	64.77	27	0.0001016	448.5	445	501.6	542.2	514.2	554	452.9	477	315.7	304	263.4	239.8	279.5	329.4	419.7	417.1	181.7	195.3	156.1	164.2	137.1	144.1	139.7	126.5	101.5	78.4	72.5	73.3	90	91.2	134.3	137.4	539.2	471.8	448.4	440	482.9	406.8	416.8	502.9	355.9	364.2
High	A2RT62	F-box/LRR-repeat protein 16 OS=Mus musculus OX=10090 GN=Fbxl16 PE=1 SV=1	VALAGGPCPPASGPASGPVSGPPVERPPLATDEK	1xCarbamidomethyl [C8]; 1xTMTpro [K34]; 1xTMTpro [N-Term]	65.4712	39	8.838e-06																	109.1	92.4	123.8	111.4	119.3	115	132.8	129	112.1	79.2	66.4	66.5	85.3	84.4	112	121.6	138.3	143.1	130.4	133.8	131.1	126.5	128.2	158.4	99	117.2
High	A2RT62	F-box/LRR-repeat protein 16 OS=Mus musculus OX=10090 GN=Fbxl16 PE=1 SV=1	VTDDGVELVAENLR	1xTMTpro [N-Term]	68.5969	65	8.838e-06	112.1	131	129.3	155.6	140.8	157.3	116.8	137.5	91.6	85.5	82.2	76.4	87	95.5	106.9	116.5	108.8	106.5	119.9	111.9	112.7	116.7	136.9	113.8	116.2	80.2	76.1	80.4	84.9	80.1	112.1	112.8	196.1	179.6	175.2	170.1	173.2	152.6	153	181.3	135.6	119.5
High	A2RT62	F-box/LRR-repeat protein 16 OS=Mus musculus OX=10090 GN=Fbxl16 PE=1 SV=1	WCCQVQDFGLK	2xCarbamidomethyl [C2; C3]; 1xTMTpro [K11]; 1xTMTpro [N-Term]	70.7671	45	2.218e-05	312.4	316.3	341.8	430.5	395.1	447.5	296.5	378	206.9	240.5	196.6	165.6	209	247.8	297.7	330.1	164.4	154.5	164.1	163.3	170.5	168.7	174.8	171.8	161.4	120.8	114.2	117.5	127.5	116.5	155	175	211.1	211.4	194.7	201.4	203.5	164.7	165.4	202.2	131.6	134.4
High	A2RTL5	Arginine/serine-rich coiled-coil protein 2 OS=Mus musculus OX=10090 GN=Rsrc2 PE=2 SV=1	NTAMDAQEALAR	1xTMTpro [N-Term]	41.8523	33	8.838e-06	88.4	105.1	126.7	195.8	177	236.8	223.2	251.2	266.9	285.6	366	371.3	293.6	388.5	238.8	252	84.6	99.7	128.1	163.2	172.7	203.2	243.1	215.8	259.7	189.6	279.4	269.8	245.8	273.2	209.8	215.8	99.5	115.8	112.6	151.4	179.3	185.7	174.4	255.6	230.5	244.5
High	A2RTL5	Arginine/serine-rich coiled-coil protein 2 OS=Mus musculus OX=10090 GN=Rsrc2 PE=2 SV=1	QQEEVFR	1xTMTpro [N-Term]	30.6801	17	0.0005777																	22.3	26.6	30	34.7	42.2	52.5	71.2	48.9	61.7	44.8	56.2	60	53.9	66.9	50.8	45.4
High	A2TJV2	Paralemmin-3 OS=Mus musculus OX=10090 GN=Palm3 PE=1 SV=1	AKGDGAVEVVWAGLR	1xTMTpro [K2]; 1xTMTpro [N-Term]	69.1645	24	8.838e-06	41.6	48	75.1	73.1	78.7	72.1	57.9	63.1	51.6	45.4	20.2	21.9	12	12.9	53	51.3																	55.6	43.4	49.6	60.3	63.6	45.5	49.4	51.6	49.6	42.3
High	A2TJV2	Paralemmin-3 OS=Mus musculus OX=10090 GN=Palm3 PE=1 SV=1	DLDVTGESGR	1xTMTpro [N-Term]	37.4226	10	0.00451	16.9	11.9	15.6	18.5	15.2	13.9	14.5	15.2	11.2	17.2	8.6	5.8	2.8	4.5	15.6	17.6
High	A2TJV2	Paralemmin-3 OS=Mus musculus OX=10090 GN=Palm3 PE=1 SV=1	GVVEVVWEGLGGR	1xTMTpro [N-Term]	89.6975	29	3.865e-05	34.9	31.6	34.2	37.1	42.7	38.4	31.1	28.2	26.6	33.2	15.8	22.7	17.3	24.4	31.9	32.3																	49	34.7	46.4	58.6	52.1	39.7	39.6	38.3	46	34.4
High	A3KFM7	Chromodomain-helicase-DNA-binding protein 6 OS=Mus musculus OX=10090 GN=Chd6 PE=1 SV=1	LDNICHVVLK	1xCarbamidomethyl [C5]; 1xTMTpro [K10]; 1xTMTpro [N-Term]	62.8965	17	0.002761	7.7	13.6	9.9	13	12	12.3	8.8	12.3	12.7	17.4	26	26.6	27.1	29.3	14.7	19.2
High	A3KFM7	Chromodomain-helicase-DNA-binding protein 6 OS=Mus musculus OX=10090 GN=Chd6 PE=1 SV=1	LIAGGHK	1xTMTpro [K7]; 1xTMTpro [N-Term]	34.1704	9	0.005672	154.8	156.1	187.4	214.3	171.5	198.4	140.4	161.2	137.7	151.9	249.1	283	245.8	335.6	197.8	207.6	119.3	139.2	156.9	165.7	123.6	164.3	116.1	141.8	128.4	130.9	183.6	230.2	216	256.4	165.8	165.3
High	A3KFX0	Cytosolic 5'-nucleotidase 1A OS=Mus musculus OX=10090 GN=Nt5c1a PE=1 SV=1	EAIDEGIAAATIFSPSR	1xTMTpro [N-Term]	80.1399	61	8.838e-06	67	82.5	99.5	113.9	84.1	112	69.6	84.1	63.8	82	87.6	80	70.9	78.4	78.9	82.3	59.7	71	60.8	76	63.6	78.6	70.3	70.8	66.2	62	71.1	79.9	73.8	79.9	72.3	78	103.7	114.1	87.8	100.9	97.1	83.8	79.5	98.1	86.3	77.1
High	A3KFX0	Cytosolic 5'-nucleotidase 1A OS=Mus musculus OX=10090 GN=Nt5c1a PE=1 SV=1	EAREPGPGAETAAVPR	1xTMTpro [N-Term]	29.2766	32	8.838e-06																	93.3	97	97.5	87.7	87.6	97.5	108.7	107	98.1	79	127.7	132.2	128.4	152	114.1	125.4	157	151.7	134.5	141.3	128.2	110.4	132.1	139.8	122.5	113.7
High	A3KFX0	Cytosolic 5'-nucleotidase 1A OS=Mus musculus OX=10090 GN=Nt5c1a PE=1 SV=1	EPGPGAETAAVPR	1xTMTpro [N-Term]	35.9739	76	8.838e-06																	22.2	24.6	21.2	28.3	22.4	35.2	25.6	29.3	25.1	31.3	38.7	37.7	27.9	36.2	26.3	30.5	47.8	41.8	39.6	40.8	44.3	32.7	32.4	37.1	43.6	34.9
High	A3KFX0	Cytosolic 5'-nucleotidase 1A OS=Mus musculus OX=10090 GN=Nt5c1a PE=1 SV=1	FCMTGGNSPICYLK	2xCarbamidomethyl [C2; C11]; 1xTMTpro [K14]; 1xTMTpro [N-Term]	79.259	27	2.218e-05																																	131.6	126.3	104.8	110.3	110.2	105.7	111.6	101.6	118	124.6
High	A3KFX0	Cytosolic 5'-nucleotidase 1A OS=Mus musculus OX=10090 GN=Nt5c1a PE=1 SV=1	GFLEALGR	1xTMTpro [N-Term]	68.8749	24	0.0003122	43.3	41.9	48.4	55.7	49.6	50.1	38.6	40.1	36.4	38	67.6	50.7	59.3	57.5	44.6	51	15.1	22.5	15.3	13.2	13.4	17.5	16.1	12.4	11.3	11.3	17.3	11.5	17.5	20.6	19	17.6	71.1	71.2	56.9	60.2	64	50	47.9	50.9	42.8	46.7
High	A3KFX0	Cytosolic 5'-nucleotidase 1A OS=Mus musculus OX=10090 GN=Nt5c1a PE=1 SV=1	SPKPQNAVTIAVSSR	1xTMTpro [K3]; 1xTMTpro [N-Term]	46.4452	22	8.838e-06																																	310.9	307.5	254.9	242.3	271.9	227.2	232.7	272.1	239.3	238.3
High	A3KFX0	Cytosolic 5'-nucleotidase 1A OS=Mus musculus OX=10090 GN=Nt5c1a PE=1 SV=1	YQLEHENEPFSPGPAFPFVK	1xTMTpro [K20]; 1xTMTpro [N-Term]	80.7553	42	8.838e-06																																	19.9	23.8	22.2	23.8	23.1	15	20.7	21.6	18	19.8
High	A3KGB4	TBC1 domain family member 8B OS=Mus musculus OX=10090 GN=Tbc1d8b PE=1 SV=1	DSLALWTFR	1xTMTpro [N-Term]	79.6278	19	0.0008768	31	34.2	33.5	40.2	35.7	45.5	27.4	31.8	18.6	24.1	17.3	15.4	15.7	16.8	30.3	26.2																	47	38.1	36.7	34.2	33.2	29.8	27.2	28.7	27.4	25.9
High	A3KGB4	TBC1 domain family member 8B OS=Mus musculus OX=10090 GN=Tbc1d8b PE=1 SV=1	FSELKDFEQLVAK	2xTMTpro [K5; K13]; 1xTMTpro [N-Term]	88.1892	17	8.838e-06	49.3	48.1	47.4	53.7	48.1	49.7	36.4	43.3	25.9	35.4	25.7	29.4	23.6	32	38.5	39	105.5	113	101	128.7	93.8	140.4	108.1	130	71.3	68.4	44.3	44	52	54.7	93.7	88.8	42.6	37.6	37.5	34.7	23.2	24.3	28.6	32.1	25.7	23.6
High	A3KGB4	TBC1 domain family member 8B OS=Mus musculus OX=10090 GN=Tbc1d8b PE=1 SV=1	SVIISIK	1xTMTpro [K7]; 1xTMTpro [N-Term]	69.0619	31	0.0006109	465.6	531.5	528.5	704.2	642.2	624.1	394.6	550.7	311	460	326.8	369.6	442.8	406.4	513.1	535.4	763.5	1131.9	810.6	1106.9	849.6	1196.8	865.3	1022.4	794.7	896.4	448.8	682.4	494.2	500.9	795.9	859.6
High	A3KGF9	Coiled-coil domain-containing protein 9B OS=Mus musculus OX=10090 GN=Ccdc9b PE=1 SV=1	AGGPGPAGR	1xTMTpro [N-Term]	20.5401	3	0.003358	26	29.8	29.5	36.2	47.5	47.3	44	43	53.9	52.8	105.2	99.4	95.1	104.5	54.3	61.6	38.8	56.9	45.5	52.2	42.3	57.3	51.9	61.2	80.1	80.2	123.5	165.8	96	142.6	73.1	70	46.3	39.2	32.8	37.7	34.6	32.7	40.5	40.1	70.2	62.9
High	A3KGF9	Coiled-coil domain-containing protein 9B OS=Mus musculus OX=10090 GN=Ccdc9b PE=1 SV=1	VELAVTMENK	1xTMTpro [K10]; 1xTMTpro [N-Term]	64.9349	34	5.039e-05	6.6	9.2	5.3	12	9.9	10.7	4.4	11.9	10.8	12.7	22.4	18.2	16.3	22.1	11.4	15.9	13.3	13.3	15.6	14.8	11.1	15.7	18	16	23.1	24	33.5	53	38.1	40.4	29.3	26	7.6	10.1	10.8	12.3	12.4	11.2	10.5	11.4	18.9	18.3
High	A3KGF9	Coiled-coil domain-containing protein 9B OS=Mus musculus OX=10090 GN=Ccdc9b PE=1 SV=1	YQEIEEDRR	1xTMTpro [N-Term]	30.8336	25	6.573e-05																	23.6	31.6	25.7	37.3	25.6	38.5	29.6	35.6	49.4	50.3	56.2	76.6	52.8	66.8	38.6	40.9
High	A3KGS3	Ral GTPase-activating protein subunit alpha-2 OS=Mus musculus OX=10090 GN=Ralgapa2 PE=1 SV=2	APLLDYIYR	1xTMTpro [N-Term]	79.2739	5	0.002111	60.7	65.8	83.8	76.1	64.4	72.5	57.8	62.5	67.2	74.3	120.5	119.7	127.1	157.2	94.4	92.9
High	A3KGS3	Ral GTPase-activating protein subunit alpha-2 OS=Mus musculus OX=10090 GN=Ralgapa2 PE=1 SV=2	GYVNFVNEVFR	1xTMTpro [N-Term]	83.4383	33	9.049e-05																	20.9	23.1	16.5	26	22.9	22.4	22.5	27.5	18.9	24	21.6	23.6	24.7	32.8	24.2	22.7
High	A3KGS3	Ral GTPase-activating protein subunit alpha-2 OS=Mus musculus OX=10090 GN=Ralgapa2 PE=1 SV=2	NATEEPNECAR	1xCarbamidomethyl [C9]; 1xTMTpro [N-Term]	21.6408	20	0.001356	8.5	9.2	10.9	21.6	11.1	17.5	13.8	14.8	18.3	12.3	26.6	34.6	31.2	34.1	14.1	21
High	A3KGS3	Ral GTPase-activating protein subunit alpha-2 OS=Mus musculus OX=10090 GN=Ralgapa2 PE=1 SV=2	QSAQEDEYVQR	1xTMTpro [N-Term]	27.2928	43	2.218e-05																	9.7	9.9	11.5	11.5	13	17	9.1	13.7	14.5	11.7	20.4	24.8	20.8	21.4	20.1	21.6
High	A3KGS3	Ral GTPase-activating protein subunit alpha-2 OS=Mus musculus OX=10090 GN=Ralgapa2 PE=1 SV=2	SFSLSWR	1xTMTpro [N-Term]	64.2072	9	0.001498																																	48.4	42.5	42.6	45.7	52.3	40.3	38.7	50.3	65	53.6
High	A3KGS3	Ral GTPase-activating protein subunit alpha-2 OS=Mus musculus OX=10090 GN=Ralgapa2 PE=1 SV=2	SSSTSDITER	1xTMTpro [N-Term]	25.2308	25	0.000567	35.9	35.4	46.7	71.7	58.6	62.7	62.5	63.3	71.1	65.3	116.5	112.7	96	123	76.5	73																	15.7	14.7	21.8	17.3	21.4	20	29	21.9	37.5	27.4
High	A3KMP2	Tetratricopeptide repeat protein 38 OS=Mus musculus OX=10090 GN=Ttc38 PE=1 SV=2	ELLTTLQEASK	1xTMTpro [K11]; 1xTMTpro [N-Term]	72.4891	25	7.513e-05																																	204.9	194.1	201.2	198.9	214.4	194.4	181.2	227.2	173.7	165.2
High	A3KMP2	Tetratricopeptide repeat protein 38 OS=Mus musculus OX=10090 GN=Ttc38 PE=1 SV=2	LFDATLTQYVK	1xTMTpro [K11]; 1xTMTpro [N-Term]	84.6146	34	3.865e-05	95.5	121.2	127.6	143	149.4	158.6	116.4	165.3	90.3	106.5	63.3	61.8	69.5	92	114.9	118.1	119.6	136.5	136.6	151.1	123.4	162.2	155.4	156.4	120.2	103.2	90	101.8	93.7	100.6	124.5	130.7
High	A3KMP2	Tetratricopeptide repeat protein 38 OS=Mus musculus OX=10090 GN=Ttc38 PE=1 SV=2	VLELLLPIR	1xTMTpro [N-Term]	98.1195	29	0.0004657																	11.6	18.8	11.3	14.2	19.6	17	16.7	18.2	9.2	13.3	6.4	4.5	7.7	6.1	14.6	13.7
High	A3KMP2	Tetratricopeptide repeat protein 38 OS=Mus musculus OX=10090 GN=Ttc38 PE=1 SV=2	WQTVLPVTQK	1xTMTpro [K10]; 1xTMTpro [N-Term]	72.5759	25	2.785e-05	90.8	117.4	105.2	138	125.7	144.7	99.1	128.3	77.5	89.1	65.3	68.4	59.4	92.5	92.7	88.9																	155.2	144.6	143.5	144.3	155.4	135.9	139.9	186.2	125.9	118.5
High	A4Q9F0	Tubulin polyglutamylase TTLL7 OS=Mus musculus OX=10090 GN=Ttll7 PE=1 SV=1	FWSDISELVVK	1xTMTpro [K11]; 1xTMTpro [N-Term]	97.7846	34	2.218e-05																	20.4	23.1	30	29.2	30.6	37.9	37.3	42.6	45.5	44.5	95.6	96.8	109.1	106.7	63	66.5
High	A4Q9F0	Tubulin polyglutamylase TTLL7 OS=Mus musculus OX=10090 GN=Ttll7 PE=1 SV=1	GPISGIGPDWGNSR	1xTMTpro [N-Term]	60.9712	51	8.838e-06	35.5	47.3	59.4	66	57.4	58.1	54	51	47.8	54.8	91.7	85.8	82.1	100.7	76.5	73.8																	43.3	51.1	40.6	42.1	44.9	43.2	42.3	47.3	52.1	49.2
High	A4Q9F0	Tubulin polyglutamylase TTLL7 OS=Mus musculus OX=10090 GN=Ttll7 PE=1 SV=1	GVLLNALK	1xTMTpro [K8]; 1xTMTpro [N-Term]	72.1633	31	0.000189	4.4	5.5	6.7	10.5	10.4	7.6	7.3	10.2	14.3	14.9	36.8	38.8	44.7	52.6	18.2	15.3	3.5	4.1	5.6	5.9	9.8	10.3	7.5	10.6	15.1	7.5	34.3	29.2	31.5	37.8	15.3	19.2	13.9	19.2	18.2	17.5	27.8	26.3	32.6	33.9	51.1	50.3
High	A4Q9F0	Tubulin polyglutamylase TTLL7 OS=Mus musculus OX=10090 GN=Ttll7 PE=1 SV=1	IFLYHDGLVR	1xTMTpro [N-Term]	62.007	38	3.33e-05																																	7.7	5	9.7	7.2	10.1	5.6	8.8	7.8	12.6	9.6
High	A4Q9F0	Tubulin polyglutamylase TTLL7 OS=Mus musculus OX=10090 GN=Ttll7 PE=1 SV=1	LKPWLLEINR	1xTMTpro [K2]; 1xTMTpro [N-Term]	77.1297	7	7.513e-05	43.7	51.1	66.7	72	75.8	90.9	70.6	86.4	88.6	99.5	209.7	206.1	235.5	289.7	129.6	124.3	60	64.5	72.1	73.7	82.9	89.3	88.8	91.8	108.6	98.6	210.4	215.9	250.2	237.1	142.7	143.6
High	A4Q9F0	Tubulin polyglutamylase TTLL7 OS=Mus musculus OX=10090 GN=Ttll7 PE=1 SV=1	LSPGSSDWEQQR	1xTMTpro [N-Term]	42.3118	55	2.218e-05																																	36.4	37.8	33.6	34.9	38.3	31	35.7	36.2	40.7	44.1
High	A4Q9F0	Tubulin polyglutamylase TTLL7 OS=Mus musculus OX=10090 GN=Ttll7 PE=1 SV=1	LVIDEMGFMK	1xTMTpro [K10]; 1xTMTpro [N-Term]	88.4948	37	2.218e-05	20.8	20.5	25.9	25.2	29.9	29.3	31.8	33.4	34.8	39.1	97.6	83.5	98.9	100.4	49.3	50.9	24	35.3	31.6	32.5	38.5	39.7	39.1	43.4	45.2	46	82.3	103.4	99.8	106.5	57.5	54.5	26.6	28	30.1	27.5	34.8	33.5	36.7	34.1	44.3	44.6
High	A4Q9F0	Tubulin polyglutamylase TTLL7 OS=Mus musculus OX=10090 GN=Ttll7 PE=1 SV=1	RLYGQNPVR	1xTMTpro [N-Term]	31.6249	28	0.0003339	38.3	49.8	79.9	90	93.2	114.3	110.1	133.8	157.3	161.2	194.9	193.1	140	161.2	126.1	117.7	35.2	31.6	50.7	52.6	54.8	78.4	71.8	79.7	100.5	82.3	125.8	126.6	120.2	126.1	83.8	81.7	61.4	66.6	63.7	76.4	87.2	83.3	88.3	113.5	132	128.7
High	A4Q9F0	Tubulin polyglutamylase TTLL7 OS=Mus musculus OX=10090 GN=Ttll7 PE=1 SV=1	SRPMDYTFVPR	1xTMTpro [N-Term]	50.6733	24	7.513e-05																																	94.4	94.6	78.3	81.2	96.8	82	90.7	99.2	118	121.8
High	A4Q9F0	Tubulin polyglutamylase TTLL7 OS=Mus musculus OX=10090 GN=Ttll7 PE=1 SV=1	YNSPGMTR	1xTMTpro [N-Term]	29.7054	8	0.003533																	12.2	14.8	16.1	15.1	15.3	16.6	21.6	18.4	26.7	20.8	42.9	46.2	49.2	52.9	28.7	32	27.4	28.6	25.7	24.8	31.8	34.5	33.9	36.7	54.4	43.3
High	A6H5Y3	Methionine synthase OS=Mus musculus OX=10090 GN=Mtr PE=1 SV=1	AVGEEAR	1xTMTpro [N-Term]	20.6654	17	0.003893	11.9	16	15.1	19.6	21.8	22.5	16.1	19.3	15.7	14.3	19.3	20.8	22.3	25.4	20.3	14.9
High	A6H5Y3	Methionine synthase OS=Mus musculus OX=10090 GN=Mtr PE=1 SV=1	AVGHLIPFMEK	1xTMTpro [K11]; 1xTMTpro [N-Term]	73.869	19	2.218e-05																	21.9	27.6	27.1	28.2	26.9	21.5	29.8	24.8	21.2	19.8	11.8	14.8	13.4	23.3	26.5	24.2	39.3	28.5	30.6	32.3	34.4	28.8	23.7	27.8	22.7	21.5
High	A6H5Y3	Methionine synthase OS=Mus musculus OX=10090 GN=Mtr PE=1 SV=1	LAEAFAEELHER	1xTMTpro [N-Term]	68.4396	74	8.838e-06																	112.3	135.2	107.8	105.3	82.6	97.1	100.9	89.9	84.6	74	48.3	66.6	66.4	64.6	95.2	90.1	110.2	100	92.4	98.5	89.6	85.3	86.5	87.7	73.5	69.7
High	A6H5Y3	Methionine synthase OS=Mus musculus OX=10090 GN=Mtr PE=1 SV=1	LASIEQATGIR	1xTMTpro [N-Term]	65.5699	20	6.035e-05																	49.5	57.4	68.5	66.6	62.3	71.9	70.2	67	55.9	44.1	43.3	60.1	52.7	56.4	65.4	66.4
High	A6H5Y3	Methionine synthase OS=Mus musculus OX=10090 GN=Mtr PE=1 SV=1	NIVGVVLACNNFR	1xCarbamidomethyl [C9]; 1xDeamidated [N11]; 1xTMTpro [N-Term]	83.0332	2	0.00604																	47.5	49.2	46.6	54.3	43.5	49.7	43.1	44.8	46.8	44.3	47.3	59.2	44.3	51.1	41.1	54.4	43.4	45.4	32	33	32.8	25.5	30.3	39	38	37
High	A6H5Y3	Methionine synthase OS=Mus musculus OX=10090 GN=Mtr PE=1 SV=1	VVGDLFGAGK	1xTMTpro [K10]; 1xTMTpro [N-Term]	71.6955	30	2.218e-05																	23.9	25.7	28	25.7	26.9	31.5	34.6	28	25.9	17.4	12.6	12.4	17.6	17.4	27.6	22.7	24.6	27.9	27.8	21.6	32.9	25.4	26.3	31.8	22.4	22.3
High	A6H5Z3	Exocyst complex component 6B OS=Mus musculus OX=10090 GN=Exoc6b PE=1 SV=1	ASDYLVDLIAFLR	1xTMTpro [N-Term]	98.4444	51	2.218e-05																	46.6	54.4	58.3	52.9	43.7	50.1	59	42.3	37.8	31.4	26.6	28	32.3	33.8	39.6	47.8
High	A6H5Z3	Exocyst complex component 6B OS=Mus musculus OX=10090 GN=Exoc6b PE=1 SV=1	ECEQFAR	1xCarbamidomethyl [C2]; 1xTMTpro [N-Term]	28.1072	21	0.001079	332.2	313.1	395.1	436.7	375.1	403.7	301	335.9	289.6	311.3	268.9	259.9	220.9	251.4	341.3	344.3	169	190.6	205.6	205.1	212.7	206.4	177	169.2	157.3	159	115.1	138.6	102.2	95	176	173.7	512.2	491.8	470.2	510.5	486.8	445	396.9	453.2	406.7	444.9
High	A6H5Z3	Exocyst complex component 6B OS=Mus musculus OX=10090 GN=Exoc6b PE=1 SV=1	EFIYACLK	1xCarbamidomethyl [C6]; 1xTMTpro [K8]; 1xTMTpro [N-Term]	68.7604	30	3.33e-05	17.9	26.9	28.9	29.3	39.9	36.1	20.4	30.8	25.6	25.3	30.2	26.9	26.2	27	28.5	31.2	36.5	32.8	49	40.5	54.4	44.9	46.5	48.3	41.6	40.4	31.7	34.1	34.9	24.4	47.1	46.9	45.7	37.8	44.1	44.3	47.1	32.3	38.7	39.5	39.6	32.9
High	A6H5Z3	Exocyst complex component 6B OS=Mus musculus OX=10090 GN=Exoc6b PE=1 SV=1	EIESTDTACIGPTLR	1xCarbamidomethyl [C9]; 1xTMTpro [N-Term]	52.1633	70	8.838e-06																	130.2	128.6	146.5	153.5	141.9	170	139.6	156.8	135.1	122.6	112.2	153.4	130	147	134.9	155.2	132.9	132.4	131.6	140.5	131.7	114.3	105.1	125.5	114.3	124.2
High	A6H5Z3	Exocyst complex component 6B OS=Mus musculus OX=10090 GN=Exoc6b PE=1 SV=1	ELVIAMEELK	1xTMTpro [K10]; 1xTMTpro [N-Term]	88.8711	33	2.785e-05																																	30.6	19.2	23.9	23.5	27.7	21.3	21.6	20.9	21.2	22.4
High	A6H5Z3	Exocyst complex component 6B OS=Mus musculus OX=10090 GN=Exoc6b PE=1 SV=1	ETFENYYR	1xTMTpro [N-Term]	44.107	21	9.049e-05	187.6	177.5	208.1	232.3	214	212.5	163.5	207.6	140.8	160.8	128.2	115.4	96.7	123.7	186.7	176.3	92.4	119.3	113.2	105.4	95.3	122.6	111.2	109.7	93.7	91	62.4	74.6	61	57.9	96.8	96.9	360.1	296.6	316.1	348.4	348	310.2	268.9	307.3	285.4	279.3
High	A6H5Z3	Exocyst complex component 6B OS=Mus musculus OX=10090 GN=Exoc6b PE=1 SV=1	HAAEEEIYTNLNQK	1xTMTpro [K14]; 1xTMTpro [N-Term]	49.1575	44	8.838e-06																	142.4	149.7	150.3	179.6	166.6	184.7	147.8	154.7	130.7	134.6	92.9	125.1	88.1	85.6	142.7	153.8	98.3	109.3	111.1	104.9	110.5	91.1	89	113.6	112.1	101.4
High	A6H5Z3	Exocyst complex component 6B OS=Mus musculus OX=10090 GN=Exoc6b PE=1 SV=1	KFPFSEFVPK	2xTMTpro [K1; K10]; 1xTMTpro [N-Term]	80.066	12	8.838e-06	345.2	393.5	489.1	588.9	512.3	583.7	410.3	486.6	366.6	412.9	288.6	320.8	198.5	297.8	414.9	441.1																	142.4	129.4	125.2	133.1	120.3	106.4	109.8	127.3	103.3	108.4
High	A6H5Z3	Exocyst complex component 6B OS=Mus musculus OX=10090 GN=Exoc6b PE=1 SV=1	KLQHEGK	2xTMTpro [K1; K7]; 1xTMTpro [N-Term]	28.4615	6	0.001854																	321.6	416.5	373.8	460.8	455.7	486.2	402	410.2	324.3	340.8	226.9	289.9	226.9	245.4	382.9	393.2
High	A6H5Z3	Exocyst complex component 6B OS=Mus musculus OX=10090 GN=Exoc6b PE=1 SV=1	KSTNLLLTR	1xTMTpro [K1]; 1xTMTpro [N-Term]	48.914	10	0.0001244	381.6	399.1	518.3	609.3	508.7	617.2	414	492.2	404.5	395.2	324.4	310.6	296.1	344	448	443.6	293.9	343.5	341.4	404.1	351	453.5	337.1	382.1	329.8	298.9	210.1	244.8	217.9	242.9	325.6	341.8	132.2	123.5	116.4	121.2	141.9	120.3	109.7	131.7	114.4	111
High	A6H5Z3	Exocyst complex component 6B OS=Mus musculus OX=10090 GN=Exoc6b PE=1 SV=1	KVVGQFPFQDIELEK	2xTMTpro [K1; K15]; 1xTMTpro [N-Term]	79.9558	38	8.838e-06	26.1	31.8	37.7	39.3	40.5	49.9	29	33.2	27.4	34.8	17.8	20.6	15.3	29.1	36.8	31.8																	57.3	60.3	63	70.6	70.3	62	51.1	64.3	52.8	61.8
High	A6H5Z3	Exocyst complex component 6B OS=Mus musculus OX=10090 GN=Exoc6b PE=1 SV=1	MAEESLETAAEHER	1xTMTpro [N-Term]	44.9969	109	8.838e-06																																	75.4	68.3	69.3	80.2	88.2	72.5	62	79.2	66.8	72.8
High	A6H5Z3	Exocyst complex component 6B OS=Mus musculus OX=10090 GN=Exoc6b PE=1 SV=1	NILDSDNYSPIPVTSEETYK	1xTMTpro [K20]; 1xTMTpro [N-Term]	73.8264	80	8.838e-06	88.1	91.6	105	145.8	97.9	117.2	84.7	90.6	86.4	101.8	72.2	75.3	55.6	72.2	96.5	100.6
High	A6H5Z3	Exocyst complex component 6B OS=Mus musculus OX=10090 GN=Exoc6b PE=1 SV=1	NLDNIVLQQPR	1xTMTpro [N-Term]	59.1764	71	8.838e-06	83.7	89.1	116.1	136.3	108.9	145.4	100.4	116.9	99.6	86.8	85.9	79	73.1	93.5	98.9	111.7	113.8	145.1	139.1	155	138.2	184.8	148.3	152.9	124.5	112.7	83.8	99.8	72.5	77.1	127.4	133.6	156.1	134.2	137.2	161.6	156.2	144.6	148.6	163.3	142.6	138.7
High	A6H5Z3	Exocyst complex component 6B OS=Mus musculus OX=10090 GN=Exoc6b PE=1 SV=1	NQVTDTNR	1xTMTpro [N-Term]	19.0016	31	0.0003676	147.2	143.4	183.9	272.7	177.1	212.4	148.6	194.7	135.7	129.5	97.6	97.4	73.5	98.9	153.5	143.5	242.9	229.3	245	291.9	235.2	312.1	231.7	253.8	208.7	181.8	128.3	124.5	95.3	100.4	195.3	179.6	305	275.4	259.2	314.8	266.9	256.9	220.8	280.3	237.6	193.4
High	A6H5Z3	Exocyst complex component 6B OS=Mus musculus OX=10090 GN=Exoc6b PE=1 SV=1	NQVTDTNRK	1xTMTpro [K9]; 1xTMTpro [N-Term]	24.5602	5	0.001359																																	175.8	172.7	171.4	220.2	181.3	172.8	174.1	188.2	168.4	129
High	A6H5Z3	Exocyst complex component 6B OS=Mus musculus OX=10090 GN=Exoc6b PE=1 SV=1	QLTLGALQQFNLDVR	1xTMTpro [N-Term]	85.8154	55	8.838e-06																	70	89.9	98.4	93.9	87.1	107.9	110.4	102.6	116.9	76.7	81.4	85.5	77.9	79	105.5	88.8
High	A6H5Z3	Exocyst complex component 6B OS=Mus musculus OX=10090 GN=Exoc6b PE=1 SV=1	STFAVFTHLPGK	1xTMTpro [K12]; 1xTMTpro [N-Term]	71.9951	46	8.838e-06	165.9	188.3	223.4	256.4	211.6	252.5	157.3	210.3	174.6	177.6	154.4	161.1	117.6	144.7	178.7	203.8	173.1	193.2	215.5	246.4	199.6	250	193.5	214.7	195.3	170.5	143.9	141.5	112.2	106.7	188.8	192.4	217.4	222.6	217.3	230	229.7	198.3	179.1	236.4	183.1	192.5
High	A6H5Z3	Exocyst complex component 6B OS=Mus musculus OX=10090 GN=Exoc6b PE=1 SV=1	TLEHLEHTYLPQVSHYR	1xTMTpro [N-Term]	57.7958	62	8.838e-06	50.9	49.3	64.3	70.4	64.8	68.3	56.1	67.6	45.9	51.2	35.2	36.8	29.4	35.6	51.6	62.5	43.6	46	49.4	55	43.2	57.4	50	49.6	44.9	40.5	30.6	28.7	28.8	27.4	42.8	42.2	60.2	59.2	57.8	68.4	69.4	57	57.3	66.7	55.7	55.4
High	A6H5Z3	Exocyst complex component 6B OS=Mus musculus OX=10090 GN=Exoc6b PE=1 SV=1	VNPVTALTLLEK	1xTMTpro [K12]; 1xTMTpro [N-Term]	95.7634	43	8.838e-06	81.1	86	108.7	112.8	100	110	90.4	93.1	80.3	84.5	69.5	62.6	57	55.6	83.4	85.3	105.8	121	117.5	122.4	120.1	131.6	99.4	109.9	109.6	92.9	71.8	78	62.6	52	107.7	110.5	170	139.3	149.5	135.1	151.4	122.3	117.6	139	115.7	121.6
High	A6H5Z3	Exocyst complex component 6B OS=Mus musculus OX=10090 GN=Exoc6b PE=1 SV=1	VVGQFPFQDIELEKQPFPK	2xTMTpro [K14; K19]; 1xTMTpro [N-Term]	89.108	31	8.838e-06																																	153.1	154.6	138	138.8	139.6	139.2	147.1	164	125.9	143.5
High	A6H603	NACHT domain- and WD repeat-containing protein 1 OS=Mus musculus OX=10090 GN=Nwd1 PE=2 SV=2	KLTELPFHLLHAGR	1xTMTpro [K1]; 1xTMTpro [N-Term]	71.6474	28	1.703e-05	19.9	23.2	20.6	22.3	15.9	21.9	12.6	23.6	10	18.2	29.7	36.4	40.7	56.2	25.9	23.4
High	A6H611	Mitochondrial intermediate peptidase OS=Mus musculus OX=10090 GN=Mipep PE=1 SV=1	EAAQEACR	1xCarbamidomethyl [C7]; 1xTMTpro [N-Term]	17.7945	29	0.0001388																	168.5	231.7	92.3	99.7	40.2	57.9	19	26.6	8.9	10.1	8.7	7	9	12.8	48.5	52
High	A6H611	Mitochondrial intermediate peptidase OS=Mus musculus OX=10090 GN=Mipep PE=1 SV=1	IFLYPNADQLK	1xTMTpro [K11]; 1xTMTpro [N-Term]	80.0441	30	0.0001016	108.5	104.5	77.5	86.6	38	51.6	31.7	31.9	30.3	27.9	28.1	24.8	29.2	33.7	63.2	58.6	173.8	224	132.3	131.2	69.9	84.1	60.9	56.6	49.3	44.2	46.9	54.1	51.7	51.9	91.1	101.7	236.7	270.5	116.8	121.6	62.4	52.7	41.7	40.5	33.4	26.9
High	A6H611	Mitochondrial intermediate peptidase OS=Mus musculus OX=10090 GN=Mipep PE=1 SV=1	VADLADFVK	1xTMTpro [K9]; 1xTMTpro [N-Term]	79.8569	30	3.865e-05																	139.9	168.8	82.1	83.6	32.8	39.1	21	13.6	13.3	7.7	8.4	9.4	10.2	11	48.4	50.3	235.4	228.1	89.2	110.6	53.2	39.8	23.5	21.5	18.8	15.7
High	A6H619	PHD and RING finger domain-containing protein 1 OS=Mus musculus OX=10090 GN=Phrf1 PE=1 SV=2	RVQHVPR	1xTMTpro [N-Term]	20.4779	19	0.004026	485.2	511.7	614.1	713.4	537	617.3	417.6	439.4	386.5	385.1	230.8	214	132	169.8	412.8	413.6	354.1	392.4	410.7	367.8	325.7	373.5	320.1	297.2	292.6	227	173	203	141.2	161.9	305.8	305	745.3	664.1	708.3	653.6	689.9	502.3	620.3	492.5	527.1	439
High	A6H630	Damage-control phosphatase ARMT1 OS=Mus musculus OX=10090 GN=Armt1 PE=1 SV=1	AHLILFK	1xTMTpro [K7]; 1xTMTpro [N-Term]	65.8893	30	0.0002461																	225.5	212.5	260.3	222.1	233	255.9	255.5	252.8	176.7	140.2	78.4	77.5	90.7	80.4	198.4	196.7	280.9	267.5	256.2	246.3	269.2	218.3	233.4	260.2	164.2	163.6
High	A6H630	Damage-control phosphatase ARMT1 OS=Mus musculus OX=10090 GN=Armt1 PE=1 SV=1	AISLLSK	1xTMTpro [K7]; 1xTMTpro [N-Term]	67.3136	30	0.0005744	429.6	455.9	545.6	623.1	624.3	695.3	495.3	574.7	369.2	393.1	267.4	280.7	243.2	322.5	452	461																	553.3	533.5	480.9	448.8	528.5	445.3	452.3	546.4	401	394.5
High	A6H630	Damage-control phosphatase ARMT1 OS=Mus musculus OX=10090 GN=Armt1 PE=1 SV=1	CDLSLSGGESSSQK	1xCarbamidomethyl [C1]; 1xTMTpro [K14]; 1xTMTpro [N-Term]	45.4851	62	8.838e-06	126.5	134.4	158.6	190.5	174.5	193.1	124.6	170.2	103.9	100.2	101.2	95.2	99.8	121.1	138.2	140																	115.8	111.7	114.7	121.7	137.8	123.8	106.4	156.3	116.7	123.1
High	A6H630	Damage-control phosphatase ARMT1 OS=Mus musculus OX=10090 GN=Armt1 PE=1 SV=1	DEGSFAYLTIK	1xTMTpro [K11]; 1xTMTpro [N-Term]	72.7037	18	0.0001094																																	186.2	158.5	138.6	160.6	161.2	144.2	125.8	153.7	125.1	122
High	A6H630	Damage-control phosphatase ARMT1 OS=Mus musculus OX=10090 GN=Armt1 PE=1 SV=1	GLREEQIQDEFFK	1xTMTpro [K13]; 1xTMTpro [N-Term]	64.5685	20	8.838e-06	109	97.5	113.4	134.9	135.1	154.3	108.5	130.4	79.4	85.1	57.6	60.5	58.9	68.1	96.7	91.8																	217.6	193.3	183.9	182.3	188	166.8	185.3	200.9	125	134.9
High	A6H630	Damage-control phosphatase ARMT1 OS=Mus musculus OX=10090 GN=Armt1 PE=1 SV=1	HGEEGIEAEK	1xTMTpro [K10]; 1xTMTpro [N-Term]	26.2666	41	8.838e-06	43.4	40.5	47.4	64.9	60.2	56.8	38.6	54.8	38.8	33.2	33.1	33.3	30.2	46.9	42.5	48.5	46.9	38.9	44.8	47.9	46.4	54.2	47.4	49.3	40.6	37.8	38.7	37.1	47.3	36.9	44.4	46.1
High	A6H630	Damage-control phosphatase ARMT1 OS=Mus musculus OX=10090 GN=Armt1 PE=1 SV=1	KTVETPVVR	1xTMTpro [K1]; 1xTMTpro [N-Term]	40.7968	7	0.0008768	208.2	218.8	275.1	298.5	336.3	350.3	238.2	317	155.5	177.4	108.7	107.1	105.1	139.5	219.5	233.5	219.4	207.2	217.1	216.4	242.2	251.2	304.7	241	191	136.1	86.6	86.1	123.3	90.5	215.8	237	145.7	126	151.6	143.4	140.7	130.6	117.7	142.9	98.8	90.7
High	A6H630	Damage-control phosphatase ARMT1 OS=Mus musculus OX=10090 GN=Armt1 PE=1 SV=1	LLQISLWGNK	1xTMTpro [K10]; 1xTMTpro [N-Term]	90.7066	33	2.785e-05	43.7	44.6	45.8	57.4	43.8	64.5	37.5	50.1	33.2	35.3	21.2	21.5	25	28.9	32.1	39.4	76.6	91.3	71.7	83.7	74.8	78.1	81	72.5	54.1	50.6	25.2	25.3	34.6	30.2	62.8	65.5	114	89.3	71.9	72.8	90.7	64.3	76	85.7	57.9	49.4
High	A6H630	Damage-control phosphatase ARMT1 OS=Mus musculus OX=10090 GN=Armt1 PE=1 SV=1	LRNELQTDKPITPLVDK	2xTMTpro [K9; K17]; 1xTMTpro [N-Term]	59.761	19	8.838e-06																	421.8	432.6	482.4	482.2	522.7	577.1	631.7	572.1	407.6	348.6	190.9	196	210.6	193.8	439.5	441.8
High	A6H630	Damage-control phosphatase ARMT1 OS=Mus musculus OX=10090 GN=Armt1 PE=1 SV=1	SLLNEGDGEPR	1xTMTpro [N-Term]	41.5223	58	8.838e-06	297.6	323.2	366.1	418.7	372.3	418.8	309.6	358.7	212.1	219.5	130.2	124.8	118.7	139.8	264.1	275.8																	283.6	234.2	233.6	212.7	250.8	207.8	216.9	240.7	162.8	157.1
High	A6H630	Damage-control phosphatase ARMT1 OS=Mus musculus OX=10090 GN=Armt1 PE=1 SV=1	TPQILTK	1xTMTpro [K7]; 1xTMTpro [N-Term]	52.6757	18	0.00278																	520.1	508.8	575.9	574.5	586.4	617.9	654.2	614.3	500.7	390.6	263.8	266.8	281.4	260.6	495.4	498.3	608.6	548.1	538.4	558.8	578.2	505.2	497.7	601	481	497.8
High	A6H630	Damage-control phosphatase ARMT1 OS=Mus musculus OX=10090 GN=Armt1 PE=1 SV=1	TVETPVVR	1xTMTpro [N-Term]	38.2145	21	0.00038	367.9	345.7	360.1	401.3	437.6	445.7	311	402.5	203.5	230.7	158.5	140.8	156.7	194.9	297.3	291.9	389.2	352.1	360.5	340.2	385.6	379.6	389	364.1	278.7	206.4	150.8	134.8	180.3	155.4	312.7	302.3	393.8	362.4	343.6	325.7	382.2	287.9	305.2	361.4	227.6	238.1
High	A6H630	Damage-control phosphatase ARMT1 OS=Mus musculus OX=10090 GN=Armt1 PE=1 SV=1	VIDTLHR	1xTMTpro [N-Term]	39.9228	43	0.000303																	53	45.1	51.5	52	52.9	57.5	60.4	57.9	38	28.9	18.1	19.2	20.4	22.2	41.4	47.1
High	A6H630	Damage-control phosphatase ARMT1 OS=Mus musculus OX=10090 GN=Armt1 PE=1 SV=1	YGILQFDGPL	1xTMTpro [N-Term]	95.3733	59	0.0004657	72.4	73.9	88.6	99.1	94.1	99.9	85.2	94.4	87.6	102.4	112.1	123.3	88.9	114.6	92	91.2	86.9	78.5	85.4	79.6	79.5	99.5	88	84.2	78.5	69.9	73.4	80.9	77.7	78.8	86.7	91.7
High	A6H687	SAC3 domain-containing protein 1 OS=Mus musculus OX=10090 GN=Sac3d1 PE=1 SV=1	YLAGEVAGR	1xTMTpro [N-Term]	44.0013	33	3.33e-05	44.1	36.6	45.2	53.3	48.1	55	51.6	68	116.8	108.9	188.9	187.3	117.6	151.4	91.8	93	38.2	45.8	44.3	41.6	52.2	52.1	60.5	56.4	128.6	97.3	164.7	155.6	117.2	105.9	95	90.4	73.3	69.7	65.2	64.7	68.4	59.7	82.8	88.8	196.2	188.7
High	A6H6A9	Rab GTPase-activating protein 1-like OS=Mus musculus OX=10090 GN=Rabgap1l PE=1 SV=1	AEENARR	1xTMTpro [N-Term]	13.5259	10	0.003046	14.1	18.6	20.4	28.4	19.2	27.1	18.8	16.9	14.2	14.1	14.7	20.2	10	18.4	15.1	16.7	29.8	35.3	41.3	34.1	28.2	40.6	34.7	45.4	31	27.2	29	38.3	24.3	27.9	33.3	35.5	31.5	34.4	23.2	18.7	26.6	17.1	30.9	26.7	25.7	23.6
High	A6H6A9	Rab GTPase-activating protein 1-like OS=Mus musculus OX=10090 GN=Rabgap1l PE=1 SV=1	ASSQYPFAVTLYVPNVPEGSVR	1xTMTpro [N-Term]	86.2854	55	8.838e-06	44.4	51.2	59	77.9	47.3	62.4	49.4	49.3	38.2	34.9	45.3	48.7	63.5	82.1	58.1	51	54.9	67	63.7	59.1	58.1	70.4	59.6	62.9	60.3	52.4	53.7	64.7	74.4	76.4	65.1	70.7
High	A6H6A9	Rab GTPase-activating protein 1-like OS=Mus musculus OX=10090 GN=Rabgap1l PE=1 SV=1	DSAQESVITR	1xTMTpro [N-Term]	30.1812	38	3.865e-05																	195.8	253.4	230.1	266.7	226	305.9	266.4	280.3	196	193.9	122.9	131	140.1	161.3	214.2	216	269.2	249.2	239	248.4	257.2	218.9	219.4	270.8	192	221.6
High	A6H6A9	Rab GTPase-activating protein 1-like OS=Mus musculus OX=10090 GN=Rabgap1l PE=1 SV=1	DTGGDGQESLYK	1xTMTpro [K12]; 1xTMTpro [N-Term]	39.1939	35	0.0004937	18	13.8	23.9	28.6	18.5	21.8	16.4	22.6	17	22.3	20.5	20.1	18.8	22.2	24.9	16.2
High	A6H6A9	Rab GTPase-activating protein 1-like OS=Mus musculus OX=10090 GN=Rabgap1l PE=1 SV=1	ENQLQQEDPMDR	1xTMTpro [N-Term]	40.3426	32	0.0002864																																	48.8	42.1	40.3	47.5	48.5	39.9	42.8	43.5	45.3	41.7
High	A6H6A9	Rab GTPase-activating protein 1-like OS=Mus musculus OX=10090 GN=Rabgap1l PE=1 SV=1	FLLETVVR	1xTMTpro [N-Term]	77.8202	23	0.001344	35.8	33.4	32.9	39.8	36.9	39.9	29.8	39.7	16.4	28.6	16.8	20	22.4	26.5	28.9	33.5																	58.2	50.3	50.6	54.2	57.6	47	43.3	52.1	37.8	41.3
High	A6H6A9	Rab GTPase-activating protein 1-like OS=Mus musculus OX=10090 GN=Rabgap1l PE=1 SV=1	GLFTLVK	1xTMTpro [K7]; 1xTMTpro [N-Term]	79.2996	23	0.0003566																																	144.7	132.3	145.5	129.6	145.9	119	137.8	137.9	112.6	111.6
High	A6H6A9	Rab GTPase-activating protein 1-like OS=Mus musculus OX=10090 GN=Rabgap1l PE=1 SV=1	ILYSFCTAFK	1xCarbamidomethyl [C6]; 1xTMTpro [K10]; 1xTMTpro [N-Term]	89.9987	34	5.039e-05	30.5	29.1	25.9	28.3	33.3	40.1	27.5	33.4	18.4	18.6	21.8	24.9	15.5	24	25.3	30.3	49.5	49.9	48.9	58.8	49.7	57.8	57.2	51.1	42.5	37.3	26.6	32.2	34.6	37.2	49.6	50.2	56.7	63.7	59.8	55.8	50.9	51.9	49.2	66.7	48	40.8
High	A6H6A9	Rab GTPase-activating protein 1-like OS=Mus musculus OX=10090 GN=Rabgap1l PE=1 SV=1	LMEQACNIK	1xCarbamidomethyl [C6]; 1xTMTpro [K9]; 1xTMTpro [N-Term]	55.8966	42	2.218e-05	58.8	60.4	62.6	78.9	75.7	79.4	59.7	75.2	50.9	63.4	76.7	73	65.7	71.3	75	85	46.2	56.9	36.7	58.9	46.7	61.4	55.9	61.8	42.4	49.5	42.6	56.5	43.7	56.6	40.5	48.1
High	A6H6A9	Rab GTPase-activating protein 1-like OS=Mus musculus OX=10090 GN=Rabgap1l PE=1 SV=1	LTYLGCMK	1xCarbamidomethyl [C6]; 1xTMTpro [K8]; 1xTMTpro [N-Term]	67.4051	31	0.0001745	64.2	65.6	75.5	99.6	83.5	95.9	81.4	94.9	43.7	62.3	54.6	48.3	43.3	58.2	81.8	77.2	75.6	92.2	80.3	98.6	81.4	103.8	101.8	100	68.3	60.5	37.3	46	51.5	59.1	70.4	81.7	111.2	112.4	108.6	108.4	109	106.2	96.4	118.4	84	88.2
High	A6H6A9	Rab GTPase-activating protein 1-like OS=Mus musculus OX=10090 GN=Rabgap1l PE=1 SV=1	NNFEDLHCK	1xCarbamidomethyl [C8]; 1xTMTpro [K9]; 1xTMTpro [N-Term]	41.3223	34	8.838e-06	101	109.4	108.7	145.6	127.5	157.9	81.7	131	73.6	91.8	72.8	79.2	64	105	117.1	104.1
High	A6H8H2	DENN domain-containing protein 4C OS=Mus musculus OX=10090 GN=Dennd4c PE=1 SV=1	ALQQAHDVLVK	1xTMTpro [K11]; 1xTMTpro [N-Term]	53.4112	44	8.838e-06	67.4	76.5	81	90.5	73.4	79.9	57.4	68.7	65.5	65.1	72.4	84.8	72.9	94.2	77.7	75.7																	124.6	120.6	111.8	101.7	103.9	88.6	90.2	92.4	95.5	95.2
High	A6H8H2	DENN domain-containing protein 4C OS=Mus musculus OX=10090 GN=Dennd4c PE=1 SV=1	CANVNNSSTTSQR	1xCarbamidomethyl [C1]; 1xTMTpro [N-Term]	18.8467	50	8.838e-06																	6.2	7.8	9.2	8.7	12.1	10.5	13.7	16.1	22.8	18.2	20.1	21.4	14.6	16.9	14.6	14.8	6.5	4	4.6	4.9	6.9	8.2	10	12.3	15.8	15.1
High	A6H8H2	DENN domain-containing protein 4C OS=Mus musculus OX=10090 GN=Dennd4c PE=1 SV=1	KPSLLSEQQQAASALVETIR	1xTMTpro [K1]; 1xTMTpro [N-Term]	76.9551	39	8.838e-06																																	84.9	70.5	82.9	66.5	75.4	57.6	51.1	57.8	58.9	59.9
High	A6H8H5	Potassium voltage-gated channel subfamily B member 2 OS=Mus musculus OX=10090 GN=Kcnb2 PE=1 SV=2	APPFLTLSR	1xTMTpro [N-Term]	66.4807	19	0.00165	38.1	41.7	49.2	58.8	47	62.4	36.3	53.6	45.4	46.1	19.1	23.6	3.2	6	38.5	43.3																	44.9	52.4	54.6	61.7	65.6	61.8	57.3	61.2	52.9	46.4
High	A6H8H5	Potassium voltage-gated channel subfamily B member 2 OS=Mus musculus OX=10090 GN=Kcnb2 PE=1 SV=2	FPTDLPGTDEHQR	1xTMTpro [N-Term]	51.1267	82	8.838e-06	75.2	82	107.9	127.1	106.5	133.9	96.7	120.3	88.6	104.1	71.7	75.2	52.9	71.2	106.4	88.8	77.6	84.1	76	90.4	93.7	117.2	94.7	98.6	84.3	74.2	54.6	60.4	51.3	48.8	79.9	83.5	90.3	85.9	100.4	99.7	107.3	97.5	97.3	96.8	90.3	104.6
High	A6H8H5	Potassium voltage-gated channel subfamily B member 2 OS=Mus musculus OX=10090 GN=Kcnb2 PE=1 SV=2	INVGGLNHEVLWR	1xTMTpro [N-Term]	64.6692	61	8.838e-06																	117.5	151.4	164.8	168.9	162.9	186.5	180.6	156.2	143.4	124.9	76.4	88.6	84.6	90.7	136	150
High	A6H8H5	Potassium voltage-gated channel subfamily B member 2 OS=Mus musculus OX=10090 GN=Kcnb2 PE=1 SV=2	LFPFSSR	1xTMTpro [N-Term]	68.8863	0	0.005629																																	46.5	40.6	43.2	51.9	40.7	44.3	36.7	47.1	43	38.9
High	A6H8H5	Potassium voltage-gated channel subfamily B member 2 OS=Mus musculus OX=10090 GN=Kcnb2 PE=1 SV=2	NGSIVSMNLK	1xDeamidated [N1]; 1xTMTpro [K10]; 1xTMTpro [N-Term]	64.069	5	0.004488																																	17	13.1	20.1	13.9	14.2	15.2	15.6	14.9	16.1	12.4
High	A6H8H5	Potassium voltage-gated channel subfamily B member 2 OS=Mus musculus OX=10090 GN=Kcnb2 PE=1 SV=2	RSFTEIDTGEDEDFLDLQR	1xTMTpro [N-Term]	66.2474	60	8.838e-06																																	59.8	59.4	42.3	44	45	35.2	48	42.2	44.9	32.6
High	A6H8H5	Potassium voltage-gated channel subfamily B member 2 OS=Mus musculus OX=10090 GN=Kcnb2 PE=1 SV=2	SMELIDVAVEK	1xTMTpro [K11]; 1xTMTpro [N-Term]	76.1617	38	1.703e-05	94.2	126.9	134.4	164.1	138.9	170	132.9	152.8	126.2	157.9	92.3	92	57.6	76.7	133.9	134.7
High	A6X919	Probable C-mannosyltransferase DPY19L1 OS=Mus musculus OX=10090 GN=Dpy19l1 PE=1 SV=1	AGTAAPAPDGLAGR	1xTMTpro [N-Term]	36.0589	49	8.838e-06	177.3	193.3	358.3	405.6	509.2	597	562.6	650.6	776.6	808.6	563.1	625.5	274.4	341	504	504.9	97.9	125.3	167.8	205.3	262.2	355.8	329.8	363.6	401	398.8	227.8	272.4	127.5	147	253.1	259.6	176.3	213.4	212.5	282.3	383.7	371.5	402.6	482.9	555.4	527.4
High	A6X919	Probable C-mannosyltransferase DPY19L1 OS=Mus musculus OX=10090 GN=Dpy19l1 PE=1 SV=1	IMDLIGIQTK	1xTMTpro [K10]; 1xTMTpro [N-Term]	87.2392	37	2.218e-05	41.5	42.8	60.1	67.4	108.3	108	95.6	136.2	116.1	141.1	108.5	113.1	43.9	62.2	90.4	109.3	5.8	6	13.9	12.9	24.5	18.4	17.7	22.9	25.8	26	18.2	17.3	6.8	6.8	20.7	19.6	20.4	28.6	35.6	48.2	61.5	63.2	62	94.2	87	94.4
High	A6X919	Probable C-mannosyltransferase DPY19L1 OS=Mus musculus OX=10090 GN=Dpy19l1 PE=1 SV=1	KAPEDVK	2xTMTpro [K1; K7]; 1xTMTpro [N-Term]	37.3663	5	0.003741																																	226.3	244.4	245.2	311.8	367.6	348.3	351.5	425.1	551.6	514.3
High	A6X919	Probable C-mannosyltransferase DPY19L1 OS=Mus musculus OX=10090 GN=Dpy19l1 PE=1 SV=1	LAAGLHWALGLR	1xTMTpro [N-Term]	80.667	67	8.838e-06	14.3	16	25.1	30.9	37.5	39	35.2	43.2	41.8	59.8	32.6	34.6	16.8	17.4	34.7	28.5	19.4	22.8	37.9	44.2	54.3	65.2	57.3	73.4	83.4	75.6	38.7	48.5	16.7	19.4	47	51.6	35.3	33	41.7	42.2	66.6	60.4	60.2	70.2	83.3	72.6
High	A6X919	Probable C-mannosyltransferase DPY19L1 OS=Mus musculus OX=10090 GN=Dpy19l1 PE=1 SV=1	LSALRPVVNHPHYEDAGLR	1xTMTpro [N-Term]	49.5247	27	8.838e-06	99.7	102.9	151.3	179.1	210.2	253.4	209.3	242.2	256	288.3	184.5	229.5	116.8	157.9	205.4	213.3	124.8	146.9	157.3	187.3	191.4	246.3	213.9	241.5	247.1	231.3	177.9	200.3	140.1	153.5	203.7	206.8	109.9	122.5	108.5	143.5	163.1	153.6	155.3	191.9	207.4	189
High	A6X919	Probable C-mannosyltransferase DPY19L1 OS=Mus musculus OX=10090 GN=Dpy19l1 PE=1 SV=1	QLFGWLFGK	1xTMTpro [K9]; 1xTMTpro [N-Term]	98.0992	34	0.0001568																																	10.4	15	9.7	11.3	23.2	20	24.9	31.8	33.2	31.6
High	A6X919	Probable C-mannosyltransferase DPY19L1 OS=Mus musculus OX=10090 GN=Dpy19l1 PE=1 SV=1	SKPGCSMPEIWDVEDPDNAGKTPLCNILVK	2xCarbamidomethyl [C5; C25]; 3xTMTpro [K2; K21; K30]; 1xTMTpro [N-Term]	86.1967	15	3.33e-05	40.4	47.3	61.3	76.5	63.8	82	71.2	71.2	76.4	62.3	53	64.4	48.9	57.7	68.2	69.1	57.2	59.5	71.8	66.2	66.3	94.8	75.1	88.6	83.8	73.8	52.8	73.9	61.4	51.6	76.2	82.1
High	A6X919	Probable C-mannosyltransferase DPY19L1 OS=Mus musculus OX=10090 GN=Dpy19l1 PE=1 SV=1	TEMGLYYSYFK	1xTMTpro [K11]; 1xTMTpro [N-Term]	76.8697	22	0.0003477																	114.1	112.7	130.6	159.2	159.2	202.2	179.3	208.2	195.8	198.5	120.5	139.9	81.4	105.8	147.5	160.1
High	A6X919	Probable C-mannosyltransferase DPY19L1 OS=Mus musculus OX=10090 GN=Dpy19l1 PE=1 SV=1	TPLCNILVK	1xCarbamidomethyl [C4]; 1xTMTpro [K9]; 1xTMTpro [N-Term]	72.659	32	7.115e-05	100.9	95	141.9	174.9	207.3	208.8	166.8	222.4	205.3	244.9	131.1	141.7	65.2	71.9	159.7	155.4	71.6	104.8	119.7	136.2	186.2	228.4	191.8	211	238.9	265.3	102.8	139.4	55.7	53.9	168.5	154.7	143.2	149.2	171.8	200.3	279.4	227	234.6	297.2	306.2	297.9
High	A6X919	Probable C-mannosyltransferase DPY19L1 OS=Mus musculus OX=10090 GN=Dpy19l1 PE=1 SV=1	VLEVLRQ	1xTMTpro [N-Term]	63.1842	9	0.001344	147.5	161.7	312.5	337.9	451.7	519.1	487.6	507.6	623.6	654.8	341.1	379.1	101.3	124.5	360.1	373.5	88	94	126.5	118.2	168.9	191	182.3	202.5	214.6	182.5	105.2	115.6	63.2	48.2	122.1	145.1	121.2	144.7	143.9	181.8	240.3	218.9	256.9	294.6	311.3	336.2
High	A6X919	Probable C-mannosyltransferase DPY19L1 OS=Mus musculus OX=10090 GN=Dpy19l1 PE=1 SV=1	VMWTPPLR	1xTMTpro [N-Term]	67.3629	7	0.003228	73.2	85.3	123.1	151.5	157.1	175.9	157	166.9	187.2	217.1	160.4	189	85	122.5	150.3	144.8																	129.7	136	108.7	122.4	146.8	146.5	160.7	181.2	155.9	150.8
High	A6X919	Probable C-mannosyltransferase DPY19L1 OS=Mus musculus OX=10090 GN=Dpy19l1 PE=1 SV=1	YSTKPDAVFAGAMPTMASVK	2xTMTpro [K4; K20]; 1xTMTpro [N-Term]	74.3107	22	8.838e-06	95	98	152.1	184.9	210.7	252.5	197.7	264.3	230	252.7	158.7	180.4	86.7	120.2	176.8	197.5	102.2	115	169.2	190.2	193	284.8	267.5	292	299.9	280.2	162.1	190.7	97.4	114.8	204.2	196	97.3	107.3	103.9	136.6	171.5	162	167	202	213.9	202.7
High	A6X935	Inter alpha-trypsin inhibitor, heavy chain 4 OS=Mus musculus OX=10090 GN=Itih4 PE=1 SV=2	AVNYASR	1xTMTpro [N-Term]	27.9163	20	0.001356	114.3	132.1	178.4	221.6	271.6	316.7	260.1	333.3	257.7	317.6	304.4	331.4	276.7	387.3	243.3	256.7	112.8	113.2	164.2	168.3	221.1	238.2	308.4	248.8	286.2	210.5	239.6	219.6	265.7	220.9	232.7	229.7	128.8	157.3	158	195.1	233	249.7	237.3	329.7	287.2	331.6
High	A6X935	Inter alpha-trypsin inhibitor, heavy chain 4 OS=Mus musculus OX=10090 GN=Itih4 PE=1 SV=2	DIVWEPPVEPDNTKR	1xTMTpro [K14]; 1xTMTpro [N-Term]	63.9576	34	8.838e-06	39.7	41.9	61.9	66	80.5	105.8	85.4	97.1	61.6	88.6	71.1	87	80.4	109.4	74.5	69.2																	65.8	72.9	62.6	76	89.1	91.3	90	126.1	85.3	111.1
High	A6X935	Inter alpha-trypsin inhibitor, heavy chain 4 OS=Mus musculus OX=10090 GN=Itih4 PE=1 SV=2	GELGQFYR	1xTMTpro [N-Term]	50.9255	0	0.00239	163.9	162.1	164.9	206.8	190.2	218.6	152.2	207.1	139.4	168.9	198.2	202.7	200.1	251.9	188	193.8																	22.2	22.6	24.7	25.3	29.5	29.7	30.2	37.8	28.2	30.1
High	A6X935	Inter alpha-trypsin inhibitor, heavy chain 4 OS=Mus musculus OX=10090 GN=Itih4 PE=1 SV=2	LGMYELLLK	1xTMTpro [K9]; 1xTMTpro [N-Term]	93.2822	30	9.049e-05	12.9	13.6	16.5	20.3	31.5	33.3	19.7	36.3	19.6	24.6	29.3	33.4	28.5	52.7	28.8	29	12.2	12.3	12.9	16	15.7	20.4	22.5	15.6	19.8	12.2	13.4	14.5	23.3	19.9	20.2	20.9	10	24	16.9	15.1	23.5	19.5	20.5	29	19.5	25.6
High	A6X935	Inter alpha-trypsin inhibitor, heavy chain 4 OS=Mus musculus OX=10090 GN=Itih4 PE=1 SV=2	TLFSVLPGLK	1xTMTpro [K10]; 1xTMTpro [N-Term]	93.6362	39	6.035e-05	11.9	14.5	20	21.6	26.9	38.5	24.8	49	19.1	27.2	31.6	31.1	34	53.3	28.5	30.1	18.6	17.7	27.5	24.6	27.2	33.3	44.4	41.4	40.1	25.6	34.8	32	50.6	48.6	44.7	44.8	19.6	30.9	22.6	32.4	48.1	47.9	40.2	73.8	32.2	53.1
High	A8C756	Thyroid adenoma-associated protein homolog OS=Mus musculus OX=10090 GN=Thada PE=1 SV=1	LLALDTLLER	1xTMTpro [N-Term]	94.8924	33	2.218e-05	26.9	31.9	49.4	58.6	46.1	57	43.8	39.7	44.5	33.5	30.7	31.7	37.6	41.7	45.6	32.9	32.9	34.7	38.4	34	36.8	43.8	41.4	42.6	44.6	29.7	22.2	27.4	34.3	37.2	35.6	37.2	56.3	61.1	50.9	54.4	58.3	52.8	54.3	55.2	54.9	49.3
High	A8Y5H7	SEC14-like protein 1 OS=Mus musculus OX=10090 GN=Sec14l1 PE=1 SV=1	ALGEEALLR	1xTMTpro [N-Term]	56.6706	41	2.218e-05	151.3	183.5	193.1	227.6	192.4	223.6	157.1	201.2	206.5	218.8	307.5	307.8	257.2	302.1	235.3	251.8	174.9	175.4	177.6	176.5	179	196.7	192.2	168.5	226.8	186.5	271.3	265.6	249.5	214.5	210	208.4	313.4	284	279.8	259.7	280.7	236.9	249.4	242.9	343.4	279.3
High	A8Y5H7	SEC14-like protein 1 OS=Mus musculus OX=10090 GN=Sec14l1 PE=1 SV=1	GKEIIEYYLR	1xTMTpro [K2]; 1xTMTpro [N-Term]	67.4859	1	0.0001094	126.7	174.9	166.4	218.4	179.7	237.9	151.8	203	194.4	202.3	251.4	276.4	205.8	257.3	187.5	207.1	107.5	116.2	124.4	111.8	126.1	130.5	157.1	123.4	170.1	140	224	224.3	209.9	189.6	169.4	182.2	250.1	257.4	246.3	241.9	278	241.3	267.8	273.9	335.2	300.7
[truncated: 92,326 more rows]
[truncated: 6 more columns]

## Sheet: F4 Results
Protein Identifying Information			Statistics
[truncated: 6,919 more rows]

## Sheet: F5 Results
Protein Identifying Information			Statistics
[truncated: 6,919 more rows]

## Sheet: F6 Results
Protein Identifying Information			Statistics
[truncated: 6,920 more rows]

[truncated: 5 more sheets: F7 Results, F8 Results, F9 Results, F10 Results, Mutant-Control Results]
