# Supplementary material for: Genetic disruption of WASHC4 drives endo-lysosomal dysfunction and cognitive-movement impairments in mice and humans
Source: eLife. 2021 Mar 22;10:e61590. doi: 10.7554/eLife.61590 (PMC7984842; doi:10.7554/eLife.61590)
Supplement: Supplementary file 3. — Module membership and module-level statistical analyses for the spatial proteomics TMT experiment (Figure 3). Each module was fit with a linear mixed model. Contrasts between Mutant and Control groups were assessed to determine which modules had significantly altered levels between genotypes. [file elife-61590-supp3.xlsx]

## Sheet: Table of Contents
Supplementary Table 3
Experiment: Spatial Proteomics WT vs. MUT mouse brain, Module Analysis
Corresponding Figures: 3, 4
Sheet Name	Description
Network Partition	Module assignment for each protein
Module Results	Module statistics and constituents

## Sheet: Network Partition
Identifying Information			Module Membership
UniProt Protein ID	Entrez Gene ID	Gene Name
O08800	20725	Serpinb8	0
P08775	20020	Polr2a	0
Q62241	20630	Snrpc	0
Q8VE73	66515	Cul7	0
Q9D8S9	69168	Bola1	0
Q9QXS1	18810	Plec	0
O70405	22241	Ulk1	0
Q61474	17690	Msi1	0
Q6PCN7	20585	Hltf	0
Q7TNF8	207777	Tspoap1	0
Q8CAM5	76877	Rab36	0
Q91V51	319953	Ttll1	0
Q9D1R2	100087	Kti12	0
Q61733	57312	Mrps31	0
Q66GT5	66461	Ptpmt1	0
Q9DBM1	67471	Gpatch1	0
O89023	12751	Tpp1	0
P08032	20739	Spta1	0
P08074	12409	Cbr2	0
P63300	20364	Selenow	0
Q1HKZ5	71751	Map3k13	0
Q69ZX8	319713	Ablim3	0
Q8BP40	66659	Acp6	0
Q9D1L0	14004	Chchd2	0
Q9WV54	11886	Asah1	0
Q8CCA0	100737	Dcun1d4	0
O09174	17117	Amacr	0
Q64373	12048	Bcl2l1	0
A2ARP1	327655	Ppip5k1	1
A2RT62	214931	Fbxl16	1
A3KMP2	239570	Ttc38	1
A6H630	73419	Armt1	1
B2RUJ5	319924	Apba1	1
E9PVD3	233651	Dchs1	1
O08529	12334	Capn2	1
O08915	11632	Aip	1
O09012	19305	Pex5	1
O09131	14873	Gsto1	1
O09172	14630	Gclm	1
O35215	13202	Ddt	1
O35350	12333	Capn1	1
O35551	54189	Rabep1	1
O35685	18221	Nudc	1
O35969	14431	Gamt	1
O54829	24012	Rgs7	1
O54983	12971	Crym	1
O55023	55980	Impa1	1
O88456	12336	Capns1	1
O88834	20420	Shd	1
O88851	26450	Rbbp9	1
P00493	15452	Hprt	1
P05201	14718	Got1	1
P07901	15519	Hsp90aa1	1
P08414	12326	Camk4	1
P09411	18655	Pgk1	1
P11404	14077	Fabp3	1
P11499	15516	Hsp90ab1	1
P12815	18570	Pdcd6	1
P13707	14555	Gpd1	1
P14152	17449	Mdh1	1
P16125	16832	Ldhb	1
P16858	14433	Gapdh	1
P17183	13807	Eno2	1
P17563	20341	Selenbp1	1
P17742	268373	Ppia	1
P17751	21991	Tpi1	1
P18760	12631	Cfl1	1
P20444	18750	Prkca	1
P21550	13808	Eno3	1
P23506	18537	Pcmt1	1
P23591	22122	Gfus	1
P24527	16993	Lta4h	1
P25799	18033	Nfkb1	1
P28474	11532	Adh5	1
P30416	14228	Fkbp4	1
P31750	11651	Akt1	1
P34022	19385	Ranbp1	1
P35123	22258	Usp4	1
P35235	19247	Ptpn11	1
P35700	18477	Prdx1	1
P36993	19043	Ppm1b	1
P40142	21881	Tkt	1
P45376	11677	Akr1b3	1
P45591	12632	Cfl2	1
P46664	11566	Adss	1
P46737	210766	Brcc3	1
P46935	17999	Nedd4	1
P47941	12929	Crkl	1
P48722	18415	Hspa4l	1
P48774	14866	Gstm5	1
P49442	16329	Inpp1	1
P49443	19042	Ppm1a	1
P50247	269378	Ahcy	1
P50295	17961	Nat2	1
P50396	14567	Gdi1	1
P51163	22276	Uros	1
P51855	14854	Gss	1
P53668	16885	Limk1	1
P54923	11544	Adprh	1
P55264	11534	Adk	1
P56375	75572	Acyp2	1
P56376	66204	Acyp1	1
P56399	22225	Usp5	1
P57780	60595	Actn4	1
P58389	110854	Ptpa	1
P61079	66105	Ube2d3	1
P61087	53323	Ube2k	1
P61148	14164	Fgf1	1
P61971	68051	Nutf2	1
P62715	19053	Ppp2cb	1
P62827	19384	Ran	1
P62881	14697	Gnb5	1
P62962	18643	Pfn1	1
P63017	15481	Hspa8	1
P63318	18752	Prkcg	1
P68254	22630	Ywhaq	1
P68368	22145	Tuba4a	1
P68369	22142	Tuba1a	1
P68372	227613	Tubb4b	1
P68373	22146	Tuba1c	1
P68404	18751	Prkcb	1
P70202	17035	Lxn	1
P70290	17524	Mpp1	1
P70296	23980	Pebp1	1
P70349	15254	Hint1	1
P84075	15444	Hpca	1
P84078	11840	Arf1	1
P97355	20603	Sms	1
P97494	14629	Gclc	1
P99024	22154	Tubb5	1
Q00612	14381	G6pdx	1
Q01065	18574	Pde1b	1
Q02053	22201	Uba1	1
Q04447	12709	Ckb	1
Q05816	16592	Fabp5	1
Q06138	12283	Cab39	1
Q07076	11750	Anxa7	1
Q08331	12308	Calb2	1
Q0KL01	68053	Ubxn2b	1
Q11011	19155	Npepps	1
Q11136	18624	Pepd	1
Q3THG9	69684	Aarsd1	1
Q3THK7	229363	Gmps	1
Q3THS6	232087	Mat2a	1
Q3TIR3	101489	Ric8a	1
Q3TMH2	74616	Scrn3	1
Q3TW96	227620	Uap1l1	1
Q3TYX3	232187	Smyd5	1
Q3UCV8	432940	Otulin	1
Q3UDE2	223723	Ttll12	1
Q3UGR5	76987	Hdhd2	1
Q3UGY8	215821	Arfgef3	1
Q3UI43	68251	Babam1	1
Q3UM45	66385	Ppp1r7	1
Q3USJ8	207278	Fchsd2	1
Q5PR73	68203	Diras2	1
Q5RJG7	75847	Crppa	1
Q60676	19060	Ppp5c	1
Q60854	20719	Serpinb6a	1
Q60864	20867	Stip1	1
Q61024	27053	Asns	1
Q61081	12539	Cdc37	1
Q61133	14872	Gstt2	1
Q61171	21672	Prdx2	1
Q61205	18476	Pafah1b3	1
Q61239	14272	Fnta	1
Q61249	18518	Igbp1	1
Q61316	15525	Hspa4	1
Q61553	14086	Fscn1	1
Q61598	14569	Gdi2	1
Q62188	22240	Dpysl3	1
Q62418	13169	Dbnl	1
Q62426	13014	Cstb	1
Q63810	19058	Ppp3r1	1
Q63844	26417	Mapk3	1
Q63932	26396	Map2k2	1
Q64010	12928	Crk	1
Q64105	20751	Spr	1
Q64442	20322	Sord	1
Q64471	14871	Gstt1	1
Q68FE6	75687	Ripor1	1
Q68FL4	74340	Ahcyl2	1
Q6NZK8	218232	Ptpdc1	1
Q6P069	109552	Sri	1
Q6P1B1	170750	Xpnpep1	1
Q6P4S6	70661	Sik3	1
Q6P5F9	103573	Xpo1	1
Q6PAR5	66691	Gapvd1	1
Q6PB44	104831	Ptpn23	1
Q6PD24	68423	Ankrd13d	1
Q6ZPJ3	217342	Ube2o	1
Q6ZQK5	78618	Acap2	1
Q6ZWZ2	67615	Ube2r2	1
Q78ZA7	17955	Nap1l4	1
Q7TMM9	22151	Tubb2a	1
Q7TQI3	107260	Otub1	1
Q7TSE6	232533	Stk38l	1
Q7TSS2	70093	Ube2q1	1
Q7TSV4	66681	Pgm2	1
Q80SW1	229709	Ahcyl1	1
Q80TY0	14269	Fnbp1	1
Q80YA7	74388	Dpp8	1
Q8BFS6	223978	Cpped1	1
Q8BFY9	238799	Tnpo1	1
Q8BG73	212531	Sh3bgrl2	1
Q8BGB7	67870	Enoph1	1
Q8BGQ7	234734	Aars	1
Q8BGT8	70911	Phyhipl	1
Q8BH58	226591	Tiprl	1
Q8BHG2	74098	Czib	1
Q8BHZ0	76820	Cyria	1
Q8BIW1	229589	Prune1	1
Q8BJU0	52551	Sgta	1
Q8BK64	217737	Ahsa1	1
Q8BKC5	70572	Ipo5	1
Q8BLR2	74020	Cpne4	1
Q8BP47	70223	Nars	1
Q8BSK8	72508	Rps6kb1	1
Q8BTY1	70266	Kyat1	1
Q8BUY9	225467	Pggt1b	1
Q8BYA0	108903	Tbcd	1
Q8BYH7	233204	Tbc1d17	1
Q8BYI9	21960	Tnr	1
Q8BZW8	66866	Nhlrc2	1
Q8C0L9	74182	Gpcpd1	1
Q8C166	266692	Cpne1	1
Q8C1A5	50492	Thop1	1
Q8C3W1	69551	2310022B05Rik	1
Q8C5W3	272589	Tbcel	1
Q8C7R4	231380	Uba6	1
Q8C878	22200	Uba3	1
Q8CB27	226418	Yod1	1
Q8CG72	100206	Adprhl2	1
Q8CGA0	68606	Ppm1f	1
Q8CHP8	67078	Pgp	1
Q8CIN4	224105	Pak2	1
Q8JZL3	105663	Thtpa	1
Q8JZS0	108030	Lin7a	1
Q8K0S0	105653	Phyhip	1
Q8K183	216134	Pdxk	1
Q8K1L5	76497	Ppp1r11	1
Q8K2V6	76582	Ipo11	1
Q8K354	109857	Cbr3	1
Q8K3H0	72993	Appl1	1
Q8R050	14852	Gspt1	1
Q8R059	74246	Gale	1
Q8R0H9	106039	Gga1	1
Q8R1G2	69574	Cmbl	1
Q8R1N4	209586	Nudcd3	1
Q8R5H1	14479	Usp15	1
Q8VBW6	234664	Nae1	1
Q8VBY2	55984	Camkk1	1
Q8VC88	227960	Gca	1
Q8VCR7	76491	Abhd14b	1
Q8VCT3	215615	Rnpep	1
Q8VD04	54645	Gripap1	1
Q8VDQ1	77219	Ptgr2	1
Q8VE47	66663	Uba5	1
Q8VED9	216551	Lgalsl	1
Q8VEE0	66646	Rpe	1
Q8VHL1	73251	Setd7	1
Q8VIM9	210146	Irgq	1
Q8WTY4	109006	Ciapin1	1
Q91V12	70025	Acot7	1
Q91V64	66307	Isoc1	1
Q91V76	70984	4931406C07Rik	1
Q91VF2	140483	Hnmt	1
Q91WE1	69024	Snx15	1
Q91WG2	70314	Rabep2	1
Q91WU5	57344	As3mt	1
Q91X96	98710	Rabif	1
Q91X97	52589	Ncald	1
Q91XL9	64291	Osbpl1a	1
Q91YN5	107652	Uap1	1
Q91YQ3	105859	Csdc2	1
Q91YS8	52163	Camk1	1
Q91Z38	66827	Ttc1	1
Q91Z53	76238	Grhpr	1
Q91ZZ3	104069	Sncb	1
Q921M7	223601	Cyrib	1
Q922E4	68671	Pcyt2	1
Q922F4	67951	Tubb6	1
Q922Y1	225896	Ubxn1	1
Q922Z0	70503	Ddo	1
Q923D2	233016	Blvrb	1
Q924M7	110119	Mpi	1
Q99J77	94181	Nans	1
Q99K85	107272	Psat1	1
Q99KK7	75221	Dpp3	1
Q99KN2	26371	Ciao1	1
Q99KP3	68631	Cryl1	1
Q99KQ4	59027	Nampt	1
Q99L47	70356	St13	1
Q99LB6	108645	Mat2b	1
Q99LX0	57320	Park7	1
Q99PT1	192662	Arhgdia	1
Q9CPT3	67311	Nanp	1
Q9CPU0	109801	Glo1	1
Q9CQ48	52653	Nudcd2	1
Q9CQ65	66902	Mtap	1
Q9CQ86	103742	Mien1	1
Q9CQM5	52700	Txndc17	1
Q9CQM9	30926	Glrx3	1
Q9CQR6	67857	Ppp6c	1
Q9CQT1	67873	Mri1	1
Q9CR00	67151	Psmd9	1
Q9CR09	66155	Ufc1	1
Q9CR16	67738	Ppid	1
Q9CR26	66201	Vta1	1
Q9CR29	52715	Ccdc43	1
Q9CRT8	73192	Xpot	1
Q9CWF2	73710	Tubb2b	1
Q9CX34	67955	Sugt1	1
Q9CX80	114886	Cygb	1
Q9CY34	67921	Ube2f	1
Q9CY64	109778	Blvra	1
Q9CYR6	109785	Pgm3	1
Q9CYU6	67228	Dph7	1
Q9CZ30	67059	Ola1	1
Q9CZ44	386649	Nsfl1c	1
Q9CZC8	69938	Scrn1	1
Q9CZD3	353172	Gars	1
Q9CZY3	66589	Ube2v1	1
Q9D061	72482	Acbd6	1
Q9D0A3	70420	Arpin	1
Q9D1A2	66054	Cndp2	1
Q9D1E6	66411	Tbcb	1
Q9D1P4	66917	Chordc1	1
Q9D2V7	78885	Coro7	1
Q9D358	11431	Acp1	1
Q9D394	52822	Rufy3	1
Q9D6F9	22153	Tubb4a	1
Q9D6Y9	74185	Gbe1	1
Q9D711	69656	Pir	1
Q9D7I5	76429	Lhpp	1
Q9D7X8	110175	Ggct	1
Q9D819	67895	Ppa1	1
Q9D853	72096	Eef1akmt2	1
Q9D892	16434	Itpa	1
Q9D967	67881	Mdp1	1
Q9DAK9	75454	Phpt1	1
Q9DB32	68977	Haghl	1
Q9DBE0	246277	Csad	1
Q9DBJ1	18648	Pgam1	1
Q9DBP5	66588	Cmpk1	1
Q9DC50	74114	Crot	1
Q9DCC4	66194	Pycrl	1
Q9DCL9	67054	Paics	1
Q9DCS2	68347	Mettl26	1
Q9ERD7	22152	Tubb3	1
Q9ERK4	110750	Cse1l	1
Q9ERL9	60596	Gucy1a1	1
Q9ESE1	80877	Lrba	1
Q9JHG6	54720	Rcan1	1
Q9JHU9	71780	Isyna1	1
Q9JI46	56409	Nudt3	1
Q9JI75	18105	Nqo2	1
Q9JII6	58810	Akr1a1	1
Q9JJV2	18645	Pfn2	1
Q9JK81	60315	Myg1	1
Q9JKX6	53893	Nudt5	1
Q9JMD3	56018	Stard10	1
Q9JMH6	50493	Txnrd1	1
Q9QUH0	93692	Glrx	1
Q9QUR6	19072	Prep	1
Q9QZM0	54609	Ubqln2	1
Q9R008	17855	Mvk	1
Q9R0P3	13885	Esd	1
Q9R0P5	56431	Dstn	1
Q9R0Q7	56351	Ptges3	1
Q9R0Y5	11636	Ak1	1
Q9R111	14544	Gda	1
Q9R1Z7	19286	Pts	1
Q9WTQ5	83397	Akap12	1
Q9WU78	18571	Pdcd6ip	1
Q9WUA6	23797	Akt3	1
Q9WUB0	24105	Rbck1	1
Q9WUD8	23873	Faim	1
Q9WUL7	56350	Arl3	1
Q9WV89	20913	Stxbp4	1
Q9Z0G0	67903	Gipc1	1
Q9Z140	12891	Cpne6	1
Q9Z1K5	23806	Arih1	1
Q9Z1K6	23807	Arih2	1
Q9Z2A5	11907	Ate1	1
Q9Z2D3	54722	Gsdme	1
Q9Z2L7	54394	Crlf3	1
P53702	15159	Hccs	2
Q9CQ00	66928	Dmac1	2
O89106	14198	Fhit	2
P20108	11757	Prdx3	2
P58059	66292	Mrps21	2
P63038	15510	Hspd1	2
P99029	54683	Prdx5	2
Q499X9	212679	Mars2	2
Q4ACU6	58234	Shank3	2
Q60597	18293	Ogdh	2
Q6P5U7	319807	Nwd2	2
Q6PB66	72416	Lrpprc	2
Q80U40	231760	Rimbp2	2
Q80Y14	73046	Glrx5	2
Q80ZS3	99045	Mrps26	2
Q8BFR5	233870	Tufm	2
Q8BGT5	108682	Gpt2	2
Q8BH55	208967	Thnsl1	2
Q8BJZ4	232536	Mrps35	2
Q8BK72	218506	Mrps27	2
Q8BYM8	71941	Cars2	2
Q8K0Z7	70207	Taco1	2
Q8K1C0	52477	Angel2	2
Q8K1Z0	67914	Coq9	2
Q8K2M0	60441	Mrpl38	2
Q8K3A0	100900	Hscb	2
Q8R164	68021	Bphl	2
Q8R1S0	217707	Coq6	2
Q8R3F5	223722	Mcat	2
Q8VE22	64656	Mrps23	2
Q91VN4	66098	Chchd6	2
Q91WK1	66701	Spryd4	2
Q91ZA3	110821	Pcca	2
Q922H2	236900	Pdk3	2
Q99KE1	107029	Me2	2
Q99KI0	11429	Aco2	2
Q99KK9	70791	Hars2	2
Q99L13	58875	Hibadh	2
Q99N95	94062	Mrpl3	2
Q9CPX7	66242	Mrps16	2
Q9CQ06	67707	Mrpl24	2
Q9CQF4	67851	Mtres1	2
Q9CR59	102060	Gadd45gip1	2
Q9CXW2	64655	Mrps22	2
Q9CY73	69163	Mrpl44	2
Q9D0G0	59054	Mrps30	2
Q9D0K2	67041	Oxct1	2
Q9D0S9	68917	Hint2	2
Q9D338	56284	Mrpl19	2
Q9D3P8	67759	Plgrkt	2
Q9D6R2	67834	Idh3a	2
Q9D7N3	69527	Mrps9	2
Q9D964	67092	Gatm	2
Q9DCA2	67994	Mrps11	2
Q9JIK9	79044	Mrps34	2
Q9JJL8	71984	Sars2	2
Q9JKF7	27393	Mrpl39	2
Q9WTP7	56248	Ak3	2
Q9WUM5	56451	Suclg1	2
Q9Z2Q5	18100	Mrpl40	2
A2APY7	69487	Ndufaf5	2
A6H611	70478	Mipep	2
B1AR13	217149	Cisd3	2
O08600	13804	Endog	2
O08749	13382	Dld	2
O09111	104130	Ndufb11	2
O35129	12034	Phb2	2
O35387	23897	Hax1	2
O35459	51798	Ech1	2
O35855	12036	Bcat2	2
O35857	21856	Timm44	2
O55125	18082	Nipsnap1	2
O55126	14467	Nipsnap2	2
O70325	625249	Gpx4	2
O88441	53375	Mtx2	2
O88696	53895	Clpp	2
O88967	27377	Yme1l1	2
P00405	17709	COX2	2
P00848	17705	ATP6	2
P03888	17716	ND1	2
P03911	17719	ND4	2
P05202	14719	Got2	2
P08249	17448	Mdh2	2
P09671	20656	Sod2	2
P09925	20930	Surf1	2
P16332	17850	Mmut	2
P19783	12857	Cox4i1	2
P22315	14151	Fech	2
P26443	14661	Glud1	2
P30275	12716	Ckmt1	2
P35486	18597	Pdha1	2
P38060	15356	Hmgcl	2
P38647	15526	Hspa9	2
P40630	21780	Tfam	2
P42125	13177	Eci1	2
P43024	12861	Cox6a1	2
P45952	11364	Acadm	2
P47738	11669	Aldh2	2
P48962	11739	Slc25a4	2
P50136	12039	Bckdha	2
P50171	14979	H2-Ke6	2
P50544	11370	Acadvl	2
P51174	11363	Acadl	2
P51881	11740	Slc25a5	2
P52196	22117	Tst	2
P52503	407785	Ndufs6	2
P53395	13171	Dbt	2
P56213	11692	Gfer	2
P56379	70257	Atp5mpl	2
P56391	110323	Cox6b1	2
P56393	66142	Cox7b	2
P56480	11947	Atp5b	2
P58064	121022	Mrps6	2
P61922	268860	Abat	2
P62075	30055	Timm13	2
P62897	13063	Cycs	2
P63030	55951	Mpc1	2
P67778	18673	Phb	2
P70404	15929	Idh3g	2
P85094	664994	Isoc2a	2
P97807	14194	Fh1	2
P97930	21915	Dtymk	2
Q03265	11946	Atp5a1	2
Q05920	18563	Pcx	2
Q07417	11409	Acads	2
Q14BV6	69101	Ydjc	2
Q14C51	69956	Ptcd3	2
Q3TC72	68126	Fahd2a	2
Q3TL44	270151	Nlrx1	2
Q3TUH1	68971	Tamm41	2
Q3U186	109093	Rars2	2
Q3U5Q7	22169	Cmpk2	2
Q3UFF7	226791	Lyplal1	2
Q3UIU2	230075	Ndufb6	2
Q3ULD5	78038	Mccc2	2
Q3ULF4	234847	Spg7	2
Q3UMR5	215999	Mcu	2
Q3UNZ8	226527	Cryzl2	2
Q3UQ84	71807	Tars2	2
Q3URE1	257633	Acsf3	2
Q3URS9	66658	Ccdc51	2
Q3UUI3	75778	Them4	2
Q3UV70	381511	Pdp1	2
Q3V384	215951	Afg1l	2
Q3V3R1	270685	Mthfd1l	2
Q4VAE3	74868	Tmem65	2
Q505D7	403187	Opa3	2
Q5IRJ6	109108	Slc30a9	2
Q5M8N4	654795	Sdr39u1	2
Q5NCE8	380836	Mrs2	2
Q5U458	230935	Dnajc11	2
Q60649	20480	Clpb	2
Q60759	270076	Gcdh	2
Q61102	11306	Abcb7	2
Q61387	20463	Cox7a2l	2
Q61425	15107	Hadh	2
Q62425	17992	Ndufa4	2
Q64433	15528	Hspe1	2
Q64521	14571	Gpd2	2
Q6PE15	213012	Abhd10	2
Q71RI9	229905	Kyat3	2
Q78IK4	68117	Apool	2
Q78J03	76467	Msrb2	2
Q7TMF3	66414	Ndufa12	2
Q7TNS2	433771	Micos10	2
Q7TSQ8	319518	Pdpr	2
Q80XN0	71911	Bdh1	2
Q80YD1	338359	Supv3l1	2
Q8BGD8	67892	Coa6	2
Q8BGH2	68653	Samm50	2
Q8BGX2	69773	Timm29	2
Q8BH04	74551	Pck2	2
Q8BH59	78830	Slc25a12	2
Q8BH86	217830	Dglucy	2
Q8BH95	93747	Echs1	2
Q8BHE8	68115	Maip1	2
Q8BIJ6	381314	Iars2	2
Q8BIP0	226539	Dars2	2
Q8BJ03	226139	Cox15	2
Q8BKZ9	27402	Pdhx	2
Q8BL03	214663	Slc25a29	2
Q8BMD8	229731	Slc25a24	2
Q8BMF3	109264	Me3	2
Q8BMF4	235339	Dlat	2
Q8BMS1	97212	Hadha	2
Q8BWF0	214579	Aldh5a1	2
Q8BWM0	96979	Ptges2	2
Q8BWT1	52538	Acaa2	2
Q8BX10	72542	Pgam5	2
Q8C0K5	73132	Slc25a16	2
Q8C163	208194	Exog	2
Q8C3X4	231279	Guf1	2
Q8C5H8	68646	Nadk2	2
Q8CAK1	216792	Iba57	2
Q8CAQ8	76614	Immt	2
Q8CC88	219189	Vwa8	2
Q8CEE7	108841	Rdh13	2
Q8CFA2	434437	Amt	2
Q8CFI5	230577	Pars2	2
Q8CGK3	74142	Lonp1	2
Q8CHT0	212647	Aldh4a1	2
Q8JZN5	229211	Acad9	2
Q8JZQ2	69597	Afg3l2	2
Q8K0D5	28030	Gfm1	2
Q8K1R3	71701	Pnpt1	2
Q8K2B3	66945	Sdha	2
Q8K2C6	68346	Sirt5	2
Q8K370	71985	Acad10	2
Q8K3J1	225887	Ndufs8	2
Q8K411	69617	Pitrm1	2
Q8K4F5	68758	Abhd11	2
Q8QZS1	227095	Hibch	2
Q8QZT1	110446	Acat1	2
Q8R0F8	68636	Fahd1	2
Q8R4N0	69634	Clybl	2
Q8VCE6	103850	Nt5m	2
Q8VCW8	264895	Acsf2	2
Q8VCX5	216001	Micu1	2
Q8VDC0	102436	Lars2	2
Q8VE33	228858	Gdap1l1	2
Q8VE38	218885	Oxnad1	2
Q8VE85	225655	Prelid3a	2
Q8VE95	223665	C030006K11Rik	2
Q8VEM8	18674	Slc25a3	2
Q91V61	94280	Sfxn3	2
Q91VA6	67811	Poldip2	2
Q91VC9	66092	Ghitm	2
Q91VD9	227197	Ndufs1	2
Q91VM9	74776	Ppa2	2
Q91VR2	11949	Atp5c1	2
Q91VT4	234309	Cbr4	2
Q91WD5	226646	Ndufs2	2
Q91WK5	68133	Gcsh	2
Q91YJ5	76784	Mtif2	2
Q91YP0	217666	L2hgdh	2
Q91YT0	17995	Ndufv1	2
Q922B1	107227	Macrod1	2
Q922E6	75619	Fastkd2	2
Q922Q4	69051	Pycr2	2
Q924D0	170728	Rtn4ip1	2
Q925I1	108888	Atad3a	2
Q99J39	56690	Mlycd	2
Q99J99	246221	Mpst	2
Q99JB2	66592	Stoml2	2
Q99JR1	14057	Sfxn1	2
Q99JY0	231086	Hadhb	2
Q99KR7	105675	Ppif	2
Q99LB2	28200	Dhrs4	2
Q99LC3	67273	Ndufa10	2
Q99LC5	110842	Etfa	2
Q99LY9	595136	Ndufs5	2
Q99M87	83945	Dnaja3	2
Q99MN9	66904	Pccb	2
Q99MR8	72039	Mccc1	2
Q99N96	94061	Mrpl1	2
Q99NB1	68738	Acss1	2
Q9CPP6	68202	Ndufa5	2
Q9CPQ1	12864	Cox6c	2
Q9CPQ3	223696	Tomm22	2
Q9CPQ8	27425	Atp5l	2
Q9CQ54	68197	Ndufc2	2
Q9CQ62	67460	Decr1	2
Q9CQ75	17991	Ndufa2	2
Q9CQ85	56322	Timm22	2
Q9CQA3	67680	Sdhb	2
Q9CQE1	66536	Nipsnap3b	2
Q9CQF0	66419	Mrpl11	2
Q9CQJ8	66218	Ndufb9	2
Q9CQN1	68015	Trap1	2
Q9CQQ7	11950	Atp5pb	2
Q9CQR4	66834	Acot13	2
Q9CQZ5	67130	Ndufa6	2
Q9CQZ6	66495	Ndufb3	2
Q9CR61	66916	Ndufb7	2
Q9CR62	67863	Slc25a11	2
Q9CR68	66694	Uqcrfs1	2
Q9CR98	66488	Fam136a	2
Q9CRA7	68055	Dmac2l	2
Q9CRB8	67900	Mtfp1	2
Q9CTY5	78506	Micu3	2
Q9CWD8	76826	Nubpl	2
Q9CWU6	56046	Uqcc1	2
Q9CWX2	69702	Ndufaf1	2
Q9CXT8	73078	Pmpcb	2
Q9CXZ1	17993	Ndufs4	2
Q9CYK1	70560	Wars2	2
Q9CYR0	381760	Ssbp1	2
Q9CZ13	22273	Uqcrc1	2
Q9CZB0	66052	Sdhc	2
Q9CZN7	108037	Shmt2	2
Q9CZP5	66821	Bcs1l	2
Q9CZR8	66399	Tsfm	2
Q9CZS1	72535	Aldh1b1	2
Q9CZU6	12974	Cs	2
Q9D023	70456	Mpc2	2
Q9D051	68263	Pdhb	2
Q9D0D3	67440	Mtpap	2
Q9D0M3	66445	Cyc1	2
Q9D0Q7	67036	Mrpl45	2
Q9D1B9	68611	Mrpl28	2
Q9D1H6	68493	Ndufaf4	2
Q9D1I5	73724	Mcee	2
Q9D273	77697	Mmab	2
Q9D2G2	78920	Dlst	2
Q9D3D9	66043	Atp5d	2
Q9D404	71147	Oxsm	2
Q9D6J6	72900	Ndufv2	2
Q9D6S7	67871	Mrrf	2
Q9D773	27398	Mrpl2	2
Q9D7B6	66948	Acad8	2
Q9D7P6	66383	Iscu	2
Q9D855	67530	Uqcrb	2
Q9D880	66525	Timm50	2
Q9D8B4	69875	Ndufa11	2
Q9D8S4	104444	Rexo2	2
Q9D938	69094	Tmem160	2
Q9DAT5	72026	Trmu	2
Q9DB60	66469	Prxl2b	2
Q9DB77	67003	Uqcrc2	2
Q9DBL1	66885	Acadsb	2
Q9DC69	66108	Ndufa9	2
Q9DC71	66407	Mrps15	2
Q9DCB8	74316	Isca2	2
Q9DCM0	66071	Ethe1	2
Q9DCS3	26922	Mecr	2
Q9DCS9	68342	Ndufb10	2
Q9DCT2	68349	Ndufs3	2
Q9DCW4	110826	Etfb	2
Q9DCZ4	68316	Apoo	2
Q9EP89	80907	Lactb	2
Q9EQ20	104776	Aldh6a1	2
Q9ER88	65111	Dap3	2
Q9ERS2	67184	Ndufa13	2
Q9ESW4	69923	Agk	2
Q9JHI5	56357	Ivd	2
Q9JIY5	64704	Htra2	2
Q9JK42	18604	Pdk2	2
Q9JKL4	66706	Ndufaf3	2
Q9JLT4	26462	Txnrd2	2
Q9JLZ3	11992	Auh	2
Q9QX60	27369	Dguok	2
Q9QYR9	171210	Acot2	2
Q9QZ23	56748	Nfu1	2
Q9QZD8	27376	Slc25a10	2
Q9QZH6	26940	Ecsit	2
Q9R0X4	56360	Acot9	2
Q9WUR9	11639	Ak4	2
Q9WV85	79059	Nme3	2
Q9WVA2	30058	Timm8a1	2
Q9WVL0	14874	Gstz1	2
Q9Z0X1	26926	Aifm1	2
Q9Z110	56454	Aldh18a1	2
Q9Z1J3	18041	Nfs1	2
Q9Z1P6	66416	Ndufa7	2
Q9Z2I0	56384	Letm1	2
Q9Z2I8	20917	Suclg2	2
Q9Z2I9	20916	Sucla2	2
P60335	23983	Pcbp1	3
Q3UL36	234023	Arglu1	3
Q6NXH3	73274	Gpbp1	3
A2ABV5	26896	Med14	3
A2BE28	76130	Las1l	3
A3KGF9	214239	Ccdc9b	3
B1AZI6	331401	Thoc2	3
B2RR83	240255	Ythdc2	3
B2RVL6	71918	Zcchc24	3
B2RXC1	320714	Trappc11	3
C0HKD9	100034361	Mfap1b	3
D3YXK2	224903	Safb	3
O08583	21681	Alyref	3
O08605	17346	Mknk1	3
O08810	20624	Eftud2	3
O35218	51786	Cpsf2	3
O35295	19291	Purb	3
O35643	11764	Ap1b1	3
O35691	18949	Pnn	3
O35841	11800	Api5	3
O54946	23950	Dnajb6	3
O55013	27096	Trappc3	3
O55128	20220	Sap18	3
O70133	13211	Dhx9	3
O70305	20239	Atxn2	3
O88196	22129	Ttc3	3
O88291	54367	Zfp326	3
O88532	22763	Zfr	3
O88569	53379	Hnrnpa2b1	3
P0C090	319817	Rc3h2	3
P14106	12260	C1qb	3
P14576	24067	Srp54a	3
P17225	19205	Ptbp1	3
P26369	22185	U2af2	3
P28659	13046	Celf1	3
P29341	18458	Pabpc1	3
P35922	14265	Fmr1	3
P42669	19290	Pura	3
P49312	15382	Hnrnpa1	3
P52912	21841	Tia1	3
P54823	13209	Ddx6	3
P56960	50912	Exosc10	3
P57722	59093	Pcbp3	3
P57724	59092	Pcbp4	3
P61406	103677	Smg6	3
P61979	15387	Hnrnpk	3
P62960	22608	Ybx1	3
P63073	13684	Eif4e	3
P63154	66877	Crnkl1	3
P70279	20935	Surf6	3
P70318	21843	Tial1	3
P70372	15568	Elavl1	3
P84089	13877	Erh	3
P97801	20595	Smn1	3
P97868	19647	Rbbp6	3
Q00PI9	68693	Hnrnpul2	3
Q01405	20334	Sec23a	3
Q02105	12262	C1qc	3
Q0P678	76014	Zc3h18	3
Q0VBL3	229700	Rbm15	3
Q2L4X1	66912	Bzw2	3
Q3TC46	225929	Patl1	3
Q3TCX3	74200	Khdc4	3
Q3TIR1	66975	Trappc13	3
Q3TLH4	226562	Prrc2c	3
Q3TLI0	216131	Trappc10	3
Q3TZX8	74035	Nol9	3
Q3U0M1	76510	Trappc9	3
Q3U0V1	16549	Khsrp	3
Q3U2P1	77371	Sec24a	3
Q3UHC0	217351	Tnrc6c	3
Q3UHK8	233833	Tnrc6a	3
Q3UJB9	234699	Edc4	3
Q3UKJ7	74255	Smu1	3
Q3ULA2	12234	Btrc	3
Q3UPL0	69162	Sec31a	3
Q3URQ0	269536	Tex10	3
Q3UTZ3	231807	Map11	3
Q3UYV9	433702	Ncbp1	3
Q501J6	67040	Ddx17	3
Q5FWH2	74154	Unkl	3
Q5NCF2	245828	Trappc1	3
Q5RJH6	226517	Smg7	3
Q5SFM8	225432	Rbm27	3
Q5SV77	217039	Ggnbp2	3
Q5U4C1	67298	Gprasp1	3
Q5U4D9	386612	Thoc6	3
Q60668	11991	Hnrnpd	3
Q60749	20218	Khdrbs1	3
Q60899	15569	Elavl2	3
Q60900	15571	Elavl3	3
Q61136	19134	Prpf4b	3
Q61584	14359	Fxr1	3
Q61656	13207	Ddx5	3
Q61701	15572	Elavl4	3
Q61990	18521	Pcbp2	3
Q62036	12009	Cep131	3
Q62448	13690	Eif4g2	3
Q64012	19383	Raly	3
Q64213	22668	Sf1	3
Q69ZP3	56695	Pnkd	3
Q6A058	67416	Armcx2	3
Q6A068	71702	Cdc5l	3
Q6A0A9	218236	Fam120a	3
Q6NV83	67958	U2surp	3
Q6NZC7	207352	Sec23ip	3
Q6NZF1	70579	Zc3h11a	3
Q6NZJ6	208643	Eif4g1	3
Q6NZN0	74213	Rbm26	3
Q6P4T2	320632	Snrnp200	3
Q6P5D8	74355	Smchd1	3
Q6PE01	66585	Snrnp40	3
Q6PEE2	269037	Ctif	3
Q6PGH1	231889	Bud31	3
Q6PHS6	217463	Snx13	3
Q6PHZ5	109095	Rbm15b	3
Q6ZPY2	229512	Smg5	3
Q7TMK9	56403	Syncrip	3
Q7TMY4	66231	Thoc7	3
Q7TN33	76183	Celf6	3
Q7TN98	67579	Cpeb4	3
Q7TN99	208922	Cpeb3	3
Q7TPM1	227723	Prrc2b	3
Q7TQH0	233871	Atxn2l	3
Q7TSC1	53761	Prrc2a	3
Q7TSY6	108013	Celf4	3
Q80SY4	225164	Mib1	3
Q80TV8	76707	Clasp1	3
Q80U58	80913	Pum2	3
Q80U78	80912	Pum1	3
Q80WQ2	234729	Vac14	3
Q80X82	68188	Sympk	3
Q80XI3	230861	Eif4g3	3
Q812E0	231207	Cpeb2	3
Q8BFU3	235315	Rnf214	3
Q8BG05	229279	Hnrnpa3	3
Q8BG81	73826	Poldip3	3
Q8BH15	78893	Cnot10	3
Q8BH75	67588	Rnf41	3
Q8BHR8	228356	1110051M20Rik	3
Q8BHS3	66810	Rbm22	3
Q8BIF2	52897	Rbfox3	3
Q8BJ05	75553	Zc3h14	3
Q8BK35	68077	Nop53	3
Q8BKI2	213988	Tnrc6b	3
Q8BKT7	107829	Thoc5	3
Q8BKX6	233789	Smg1	3
Q8BTF8	76897	Ralyl	3
Q8BTV2	269061	Cpsf7	3
Q8BVY0	66409	Rsl1d1	3
Q8BWL5	207181	Rbms3	3
Q8BX17	216766	Gemin5	3
Q8BZ20	243771	Parp12	3
Q8C008	241688	Dzank1	3
Q8C1Z7	102774	Bbs4	3
Q8C2Q3	56275	Rbm14	3
Q8C3F2	207375	Fam120c	3
Q8C5L3	72068	Cnot2	3
Q8C7V3	105372	Utp15	3
Q8C854	17876	Myef2	3
Q8CAK3	319278	Shfl	3
Q8CCS6	54196	Pabpn1	3
Q8CEC6	238831	Ppwd1	3
Q8CFQ3	11834	Aqr	3
Q8CGC4	241846	Lsm14b	3
Q8CGF7	56070	Tcerg1	3
Q8CGZ0	27967	Cherp	3
Q8CH09	234373	Sugp2	3
Q8CH18	67500	Ccar1	3
Q8CH25	66660	Sltm	3
Q8CI03	224613	Flywch1	3
Q8CIN6	78784	Celf3	3
Q8CJ67	29819	Stau2	3
Q8CJF9	214150	Ago3	3
Q8CJG0	239528	Ago2	3
Q8CJG1	236511	Ago1	3
Q8JZX4	76938	Rbm17	3
Q8K0V4	232791	Cnot3	3
Q8K2D3	353190	Edc3	3
Q8K2F8	67070	Lsm14a	3
Q8K2L8	217449	Trappc12	3
Q8K310	17184	Matr3	3
Q8K3W3	192160	Casc3	3
Q8K4Z5	67465	Sf3a1	3
Q8QZY9	107701	Sf3b4	3
Q8R081	15388	Hnrnpl	3
Q8R326	66645	Pspc1	3
Q8R3G1	100336	Ppp1r8	3
Q8R3N6	225160	Thoc1	3
Q8R4E6	75029	Purg	3
Q8R5K4	230082	Nol6	3
Q8VC51	216853	Wrap53	3
Q8VD12	29813	Zfp385a	3
Q8VDW0	68278	Ddx39a	3
Q8VE18	74133	Smg8	3
Q8VHK9	72162	Dhx36	3
Q8VHN8	66911	Nudt16l1	3
Q8VIJ6	71514	Sfpq	3
Q91VC3	192170	Eif4a3	3
Q91VE6	67949	Nifk	3
Q91W18	219249	Tdrd3	3
Q91W39	228869	Ncoa5	3
Q91WF7	103199	Fig4	3
Q91WJ8	51886	Fubp1	3
Q91WM1	20744	Strbp	3
Q91YD3	75901	Dcp1a	3
Q91YR7	68879	Prpf6	3
Q91Z31	56195	Ptbp2	3
Q91Z49	69823	Fyttd1	3
Q91ZS8	110532	Adarb1	3
Q920Q6	76626	Msi2	3
Q921F2	230908	Tardbp	3
Q922K7	110109	Nop2	3
Q922M7	98404	AI597479	3
Q922V4	53317	Plrg1	3
Q923D5	60321	Wbp11	3
Q99K48	53610	Nono	3
Q99KP6	28000	Prpf19	3
Q99KX1	30853	Mlf2	3
Q99LC2	67337	Cstf1	3
Q99LI7	228410	Cstf3	3
Q99M28	19826	Rnps1	3
Q99ME9	69237	Gtpbp4	3
Q99MJ9	94213	Ddx50	3
Q99MS8	110012	Tpgs1	3
Q99MU3	56417	Adar	3
Q99PU8	72831	Dhx30	3
Q99PV0	192159	Prpf8	3
Q9CQA1	66682	Trappc5	3
Q9CQI7	20639	Snrpb2	3
Q9CQL1	66441	Magohb	3
Q9CRA9	67529	Fgfr1op2	3
Q9CSN1	66354	Snw1	3
Q9CW46	71766	Raver1	3
Q9CWN7	52846	Cnot11	3
Q9CWZ3	60365	Rbm8a	3
Q9CX53	67242	Gemin6	3
Q9CX86	77134	Hnrnpa0	3
Q9CXY6	67781	Ilf2	3
Q9CY57	66511	Chtop	3
Q9CYC6	70640	Dcp2	3
Q9D0E1	76936	Hnrnpm	3
Q9D0I8	69902	Mrto4	3
Q9D0W5	68816	Ppil1	3
Q9D1J3	66118	Sarnp	3
Q9D1M0	110379	Sec13	3
Q9D289	78232	Trappc6b	3
Q9D662	27054	Sec23b	3
Q9D824	66899	Fip1l1	3
Q9D883	108121	U2af1	3
Q9DB90	71997	Smg9	3
Q9DBD5	75273	Pelp1	3
Q9DBE9	56095	Ftsj3	3
Q9DBU6	66880	Rsrc1	3
Q9DC48	71713	Cdc40	3
Q9DCD2	67439	Xab2	3
Q9EP97	80886	Senp3	3
Q9EPU0	19704	Upf1	3
Q9EPU4	94230	Cpsf1	3
Q9EPV8	66177	Ubl5	3
Q9ERA6	54723	Tfip11	3
Q9ES56	60409	Trappc4	3
Q9EST3	74203	Eif4enif1	3
Q9JII5	70248	Dazap1	3
Q9JIX8	56215	Acin1	3
Q9JJ43	268859	Rbfox1	3
Q9JJ80	67239	Rpf2	3
Q9JJF3	71952	Riox1	3
Q9JJT0	59028	Rcl1	3
Q9JJW6	56009	Alyref2	3
Q9JJY4	53975	Ddx20	3
Q9JKN6	664883	Nova1	3
Q9JKP5	56758	Mbnl1	3
Q9QX47	20658	Son	3
Q9QYS9	19317	Qk	3
Q9R0B7	26919	Zfp346	3
Q9R0I7	56531	Ylpm1	3
Q9R0L6	18536	Pcm1	3
Q9R226	13992	Khdrbs3	3
Q9WV02	19655	Rbmx	3
Q9WVR4	23879	Fxr2	3
Q9Z0H4	14007	Celf2	3
Q9Z108	20853	Stau1	3
Q9Z130	50926	Hnrnpdl	3
Q9Z1M8	24010	Ik	3
Q9Z1N5	53817	Ddx39b	3
Q9Z1X4	16201	Ilf3	3
Q9Z204	15381	Hnrnpc	3
Q9Z2X8	50868	Keap1	3
Q9Z321	21976	Top3b	3
P62331	11845	Arf6	4
P70452	20909	Stx4a	4
Q99JB8	80708	Pacsin3	4
A2AHL1	228432	Ano3	4
B1AS29	14807	Grik3	4
O35393	13643	Efnb3	4
O35657	18010	Neu1	4
O70496	26373	Clcn7	4
O88427	58226	Cacna1h	4
O88704	15165	Hcn1	4
P08103	15162	Hck	4
P14094	11931	Atp1b1	4
P17809	20525	Slc2a1	4
P21836	11423	Ache	4
P47759	18197	Nsg2	4
P49446	19267	Ptpre	4
P50571	14400	Gabrb1	4
P70699	14387	Gaa	4
P97333	18186	Nrp1	4
P97772	14816	Grm1	4
P97785	14585	Gfra1	4
Q01338	11551	Adra2a	4
Q04519	20597	Smpd1	4
Q05909	19270	Ptprg	4
Q3TWN3	94219	Cnnm2	4
Q60770	20912	Stxbp3	4
Q63959	16504	Kcnc3	4
Q64455	19271	Ptprj	4
Q66L44	100503659	Cbarp	4
Q69ZQ1	329828	Myorg	4
Q6P5F6	227059	Slc39a10	4
Q6PDJ1	320508	Cachd1	4
Q6RKD8	396184	Flrt1	4
Q7TMS5	26357	Abcg2	4
Q8BGR2	231549	Lrrc8d	4
Q8BKG3	71461	Ptk7	4
Q8BR63	73385	Fam177a	4
Q8BWS5	243385	Gprin3	4
Q8VEB4	192654	Pla2g15	4
Q8VHH7	104111	Adcy3	4
Q91VK4	64294	Itm2c	4
Q9CZV8	72194	Fbxl20	4
Q9DB75	66626	Cdip1	4
Q9EPU5	94185	Tnfrsf21	4
Q9JHE3	54447	Asah2	4
Q9JJ00	22038	Plscr1	4
Q9JJF9	66552	Sppl2a	4
Q9JKZ2	53881	Slc5a3	4
Q9R0A1	12724	Clcn2	4
Q9R0M0	53883	Celsr2	4
A2A699	217219	Fam171a2	4
B2RSH2	14677	Gnai1	4
O35449	260297	Prrt1	4
O35604	18145	Npc1	4
O89026	19876	Robo1	4
P35802	234267	Gpm6a	4
P42866	18390	Oprm1	4
P60879	20614	Snap25	4
P61226	74012	Rap2b	4
P62071	66922	Rras2	4
P70414	20541	Slc8a1	4
Q2TV84	17364	Trpm1	4
Q60805	17289	Mertk	4
Q61290	12290	Cacna1e	4
Q61490	11658	Alcam	4
Q61851	14184	Fgfr3	4
Q6PCX7	244058	Rgma	4
Q80TH2	59079	Erbin	4
Q8BNJ6	74513	Neto2	4
Q8BPM0	208846	Daam1	4
Q8BTY2	218756	Slc4a7	4
Q8BZN6	210293	Dock10	4
Q8C180	327826	Frs2	4
Q8VCY8	235044	Plppr2	4
Q91W53	57437	Golga7	4
Q99PI8	65079	Rtn4r	4
Q9ERB5	58807	Slco1c1	4
Q9WTS4	23963	Tenm1	4
Q9Z0P4	18483	Palm	4
A2AAE1	229227	4932438A13Rik	4
B0F2B4	100113365	Nlgn4l	4
B2RXS4	140570	Plxnb2	4
G5E829	67972	Atp2b1	4
O08532	12293	Cacna2d1	4
O08688	12337	Capn5	4
O08989	17532	Mras	4
O09117	19027	Sypl	4
O35136	17968	Ncam2	4
O35405	18807	Pld3	4
O35409	53320	Folh1	4
O35474	13612	Edil3	4
O35607	12168	Bmpr2	4
O54991	53321	Cntnap1	4
O70443	14687	Gnaz	4
O88507	12804	Cntfr	4
O88703	15166	Hcn2	4
O89051	16432	Itm2b	4
P01831	21838	Thy1	4
P04925	19122	Prnp	4
P05532	16590	Kit	4
P08752	14678	Gnai2	4
P10833	20130	Rras	4
P11881	16438	Itpr1	4
P12657	12669	Chrm1	4
P13595	17967	Ncam1	4
P15208	16337	Insr	4
P15209	18212	Ntrk2	4
P16092	14182	Fgfr1	4
P16330	12799	Cnp	4
P18052	19262	Ptpra	4
P18572	12215	Bsg	4
P18872	14681	Gnao1	4
P21278	14672	Gna11	4
P21279	14682	Gnaq	4
P21995	13723	Emb	4
P22933	14403	Gabrd	4
P23818	14799	Gria1	4
P25911	17096	Lyn	4
P26049	14396	Gabra3	4
P32507	19294	Nectin2	4
P35288	19335	Rab23	4
P35762	12520	Cd81	4
P35803	14758	Gpm6b	4
P39087	14806	Grik2	4
P40237	12521	Cd82	4
P43406	16410	Itgav	4
P48542	16522	Kcnj6	4
P51830	11515	Adcy9	4
P54116	13830	Stom	4
P55012	20496	Slc12a2	4
P61028	235442	Rab8b	4
P61264	56216	Stx1b	4
P61793	14745	Lpar1	4
P62482	16498	Kcnab2	4
P62746	11852	Rhob	4
P62812	14394	Gabra1	4
P62835	109905	Rap1a	4
P62874	14688	Gnb1	4
P62880	14693	Gnb2	4
P63001	19353	Rac1	4
P63080	14402	Gabrb3	4
P63094	14683	Gnas	4
P63137	14401	Gabrb2	4
P63250	16519	Kcnj3	4
P63321	56044	Rala	4
P70206	18844	Plxna1	4
P70207	18845	Plxna2	4
P84096	56212	Rhog	4
P84309	224129	Adcy5	4
P97300	20320	Nptn	4
P97370	11933	Atp1b3	4
P97490	11514	Adcy8	4
P97792	13052	Cxadr	4
P97952	20266	Scn1b	4
Q01815	12288	Cacna1c	4
Q03137	13838	Epha4	4
Q04736	22612	Yes1	4
Q0GA42	83674	Cnnm1	4
Q3TH73	117160	Ttyh2	4
Q3TY60	76156	Fam131b	4
Q3UNH4	26913	Gprin1	4
Q3UVX5	108071	Grm5	4
Q56A07	72821	Scn2b	4
Q5DTL9	94229	Slc4a10	4
Q5DU41	433926	Lrrc8b	4
Q5SYD0	338367	Myo1d	4
Q60629	13839	Epha5	4
Q61090	14369	Fzd7	4
Q61165	20544	Slc9a1	4
Q61271	11479	Acvr1b	4
Q61410	19092	Prkg2	4
Q61411	15461	Hras	4
Q61423	16492	Kcna4	4
Q61609	20515	Slc20a1	4
Q61627	14803	Grid1	4
Q61730	16180	Il1rap	4
Q61772	13841	Epha7	4
Q62092	18196	Nsg1	4
Q62179	20352	Sema4b	4
Q62283	21912	Tspan7	4
Q63739	19243	Ptp4a1	4
Q64735	12946	Cr1l	4
Q6NXK7	269109	Dpp10	4
Q6NXK8	11419	Asic1	4
Q6P1B3	319352	Pianp	4
Q6P5F7	78339	Ttyh3	4
Q6P6N5	101809	Spred3	4
Q6PDI6	235461	Mindy2	4
Q6PHN9	77407	Rab35	4
Q6PHS9	56808	Cacna2d2	4
Q6PIC6	232975	Atp1a3	4
Q6Q477	381290	Atp2b4	4
Q6VVW5	230103	Npr2	4
Q6WQJ1	269060	Dagla	4
Q6ZPR4	227632	Kcnt1	4
Q71M36	29873	Cspg5	4
Q76LS9	75007	Mindy1	4
Q7M729	399548	Scn4b	4
Q7TME0	229791	Plppr4	4
Q7TPB0	216152	Plppr3	4
Q7TSH8	71947	Tmem94	4
Q80T41	242425	Gabbr2	4
Q80VQ0	67689	Aldh3b1	4
Q80WG5	241296	Lrrc8a	4
Q80ZD8	229715	Amigo1	4
Q810C1	76965	Slitrk1	4
Q8BFR4	75612	Gns	4
Q8BG50	271711	Tmem169	4
Q8BG67	76740	Efr3a	4
Q8BGA2	218454	Lhfpl2	4
Q8BGU5	67974	Ccny	4
Q8BGX3	211187	Lrtm2	4
Q8BHJ6	218442	Serinc5	4
Q8BQP9	52882	Rgs7bp	4
Q8BQQ1	224454	Zdhhc14	4
Q8BRJ3	225392	Rell2	4
Q8BY89	68682	Slc44a2	4
Q8BYP3	23912	Rhof	4
Q8C0Z1	106581	Fam234a	4
Q8C145	106957	Slc39a6	4
Q8C4X2	70425	Csnk1g3	4
Q8C5W0	94040	Clmn	4
Q8CA95	23984	Pde10a	4
Q8CFE6	67760	Slc38a2	4
Q8CGK7	14680	Gnal	4
Q8CIP5	214240	Disp2	4
Q8JZR6	59033	Slc4a8	4
Q8K097	72393	Faim2	4
Q8K353	66060	Cystm1	4
Q8R373	71566	Clmp	4
Q8R3L5	108116	Slco3a1	4
Q8VDN2	11928	Atp1a1	4
Q8VDQ8	64383	Sirt2	4
Q8VHW2	81905	Cacng8	4
Q91V14	57138	Slc12a5	4
Q91XY4	93712	Pcdhga4	4
Q91YT8	208795	Tmem63a	4
Q924N4	107723	Slc12a6	4
Q924S8	114715	Spred1	4
Q99JI6	215449	Rap1b	4
Q9CPW0	66797	Cntnap2	4
Q9CQD1	271457	Rab5a	4
Q9CX84	56470	Rgs19	4
Q9CZ52	69538	Antxr1	4
Q9D428	71146	Golga7b	4
Q9D6F4	14397	Gabra4	4
Q9D8B7	83964	Jam3	4
Q9DAS9	14701	Gng12	4
Q9DC51	14679	Gnai3	4
Q9EPK2	19889	Rp2	4
Q9EQP2	98878	Ehd4	4
Q9JIM1	63959	Slc29a1	4
Q9JIZ9	70310	Plscr3	4
Q9JJY3	58994	Smpd3	4
Q9JMB8	53870	Cntn6	4
Q9QUI0	11848	Rhoa	4
Q9QXV8	24064	Spry2	4
Q9QY42	14763	Gpr37	4
Q9QYC1	54604	Pcnx	4
Q9QYI5	56812	Dnajb2	4
Q9QZB0	56533	Rgs17	4
Q9R0K7	11941	Atp2b2	4
Q9R1V4	11488	Adam11	4
Q9R1V6	11496	Adam22	4
Q9WTS6	23965	Tenm3	4
Q9WU60	11990	Atrn	4
Q9WUC3	23934	Ly6h	4
Q9WV18	54393	Gabbr1	4
Q9WV27	27222	Atp1a4	4
Q9WVE8	23970	Pacsin2	4
Q9Z0U0	19775	Xpr1	4
Q9Z0V1	56543	Kcnd3	4
Q9Z0V2	16508	Kcnd2	4
Q9Z1L5	12294	Cacna2d3	4
Q9Z1M0	18439	P2rx7	4
Q9Z218	13483	Dpp6	4
Q9Z2M6	24109	Ubl3	4
Q9Z351	16536	Kcnq2	4
A2A891	100072	Camta1	5
A2AG50	78283	Map7d2	5
A2AJI0	245877	Map7d1	5
A2AR02	228005	Ppig	5
A4Q9F0	70892	Ttll7	5
B2RRE7	73945	Otud4	5
E9Q5K9	231386	Ythdc1	5
O08784	21453	Tcof1	5
O09167	19933	Rpl21	5
O35326	20384	Srsf5	5
O35900	27756	Lsm2	5
O54879	15354	Hmgb3	5
O55142	57808	Rpl35a	5
O55236	24018	Rngtt	5
O70194	55944	Eif3d	5
O70251	55949	Eef1b2	5
O70551	20815	Srpk1	5
O88735	17761	Map7	5
O89086	19652	Rbm3	5
O89114	56323	Dnajb5	5
P10126	13627	Eef1a1	5
P10630	13682	Eif4a2	5
P12970	27176	Rpl7a	5
P14115	26451	Rpl27a	5
P14148	19989	Rpl7	5
P14869	11837	Rplp0	5
P19253	22121	Rpl13a	5
P23116	13669	Eif3a	5
P27048	20638	Snrpb	5
P27659	27367	Rpl3	5
P28352	11792	Apex1	5
P32067	20823	Ssb	5
P32233	13494	Drg1	5
P35550	14113	Fbl	5
P35979	269261	Rpl12	5
P35980	19899	Rpl18	5
P39061	12822	Col18a1	5
P41105	19943	Rpl28	5
P47911	19988	Rpl6	5
P47915	19944	Rpl29	5
P47962	100503670	Rpl5	5
P47963	270106	Rpl13	5
P47964	54217	Rpl36	5
P50580	18813	Pa2g4	5
P51410	20005	Rpl9	5
P52479	22224	Usp10	5
P53026	19896	Rpl10a	5
P53996	12785	Cnbp	5
P56959	233908	Fus	5
P57784	68981	Snrpa1	5
P60229	16341	Eif3e	5
P60824	12696	Cirbp	5
P60843	13681	Eif4a1	5
P61222	24015	Abce1	5
P61255	19941	Rpl26	5
P61514	19981	Rpl37a	5
P61600	67877	Naa20	5
P62082	20115	Rps7	5
P62307	69878	Snrpf	5
P62309	68011	Snrpg	5
P62317	107686	Snrpd2	5
P62320	67332	Snrpd3	5
P62631	13628	Eef1a2	5
P62717	76808	Rpl18a	5
P62751	268449	Rpl23a	5
P62830	65019	Rpl23	5
P62852	75617	Rps25	5
P62862	14109	Fau	5
P62889	19946	Rpl30	5
P62900	114641	Rpl31	5
P62911	19951	Rpl32	5
P62918	26961	Rpl8	5
P62984	22186	Uba52	5
P62996	20462	Tra2b	5
P63323	20042	Rps12	5
P67984	19934	Rpl22	5
P68040	14694	Rack1	5
P70255	18029	Nfic	5
P83870	68479	Phf5a	5
P83882	19982	Rpl36a	5
P84099	19921	Rpl19	5
P84104	20383	Srsf3	5
P97313	19090	Prkdc	5
P97379	23881	G3bp2	5
P97479	17921	Myo7a	5
Q05D44	226982	Eif5b	5
Q0KK55	76484	Kndc1	5
Q3TEA8	15441	Hp1bp3	5
Q3TIV5	69082	Zc3h15	5
Q3TJZ6	72722	Fam98a	5
Q3TRR0	213582	Map9	5
Q3TSG4	268420	Alkbh5	5
Q3U319	233900	Rnf40	5
Q3UEB3	67959	Puf60	5
Q52KI8	51796	Srrm1	5
Q569Z6	230753	Thrap3	5
Q56A08	209416	Gpkow	5
Q5NBX1	12808	Cobl	5
Q5SUF2	67684	Luc7l3	5
Q5SW19	74148	Cluh	5
Q5SXY1	432572	Specc1	5
Q60974	20185	Ncor1	5
Q61655	13680	Ddx19a	5
Q61937	18148	Npm1	5
Q62167	13205	Ddx3x	5
Q62189	53607	Snrpa	5
Q62203	20222	Sf3a2	5
Q62376	20637	Snrnp70	5
Q62446	30795	Fkbp3	5
Q64362	14339	Aktip	5
Q64707	22183	Zrsr1	5
Q66JV4	77604	Rbm12b2	5
Q66T02	269608	Plekhg5	5
Q6A0A2	217980	Larp4b	5
Q6DFW4	55989	Nop58	5
Q6NZB0	68598	Dnajc8	5
Q6P5D3	106794	Dhx57	5
Q6PCZ4	107528	Magee1	5
Q6PDM2	110809	Srsf1	5
Q6PDX6	66743	Rnf220	5
Q6PEB6	19070	Mob4	5
Q6PGG6	237107	Gnl3l	5
Q6PGN3	70762	Dclk2	5
Q6Y7W8	227331	Gigyf2	5
Q6ZWU9	57294	Rps27	5
Q6ZWV3	110954	Rpl10	5
Q6ZWV7	100038991	Gm2000	5
Q6ZWX6	13665	Eif2s1	5
Q7TPV2	224170	Dzip3	5
Q80SY5	66921	Prpf38b	5
Q80VD1	68215	Fam98b	5
Q80W14	54614	Prpf40b	5
Q80X50	74383	Ubap2l	5
Q80XC6	217827	Nrde2	5
Q80YE7	69635	Dapk1	5
Q8BFV2	234069	Pcid2	5
Q8BG31	76982	Vxn	5
Q8BGT7	76479	Smndc1	5
Q8BJL0	54380	Smarcal1	5
Q8BK63	93687	Csnk1a1	5
Q8BL97	225027	Srsf7	5
Q8BMB3	26987	Eif4e2	5
Q8BMJ3	66235	Eif1ax	5
Q8BNV1	15547	Trmt2a	5
Q8BP67	68193	Rpl24	5
Q8BSA9	209584	Tyw3	5
Q8BUY8	245607	Gprasp2	5
Q8BWZ3	231713	Naa25	5
Q8BYK6	229096	Ythdf3	5
Q8BZQ7	99152	Anapc2	5
Q8BZX4	218543	Srek1	5
Q8C0C7	66590	Farsa	5
Q8C1B1	67886	Camsap2	5
Q8C9B9	23856	Dido1	5
Q8CB77	27224	Eloa	5
Q8CCF0	68988	Prpf31	5
Q8CCP0	66244	Nemf	5
Q8CFE2	72612	Hpf1	5
Q8CI96	78785	Clip4	5
Q8JZQ9	27979	Eif3b	5
Q8K019	72567	Bclaf1	5
Q8K339	16588	Kin	5
Q8K3X4	238330	Irf2bpl	5
Q8K409	18970	Polb	5
Q8QZT2	73420	Ccsap	5
Q8QZY1	223691	Eif3l	5
Q8R1F0	101966	D8Ertd738e	5
Q8R2U0	72124	Seh1l	5
Q8R3L2	66855	Tcf25	5
Q8R4U7	269593	Luzp1	5
Q8R4X3	75710	Rbm12	5
Q8VD63	72480	Tspyl4	5
Q8VDM6	232989	Hnrnpul1	5
Q8VDP2	77644	C330007P06Rik	5
Q8VEG6	231464	Cnot6l	5
Q8VH51	170791	Rbm39	5
Q8VID5	170472	Recql5	5
Q91V81	68035	Rbm42	5
Q91VN6	72935	Ddx41	5
Q91VR5	104721	Ddx1	5
Q91VX2	68926	Ubap2	5
Q91WK2	68135	Eif3h	5
Q91YI4	216869	Arrb2	5
Q91YJ3	77862	Thyn1	5
Q921F4	72692	Hnrnpll	5
Q921M3	101943	Sf3b3	5
Q922U1	70767	Prpf3	5
Q99JX7	53319	Nxf1	5
Q99L45	67204	Eif2s2	5
Q99LF4	28088	Rtcb	5
Q99MR6	83701	Srrt	5
Q99NH0	81702	Ankrd17	5
Q9CPR4	319195	Rpl17	5
Q9CPT5	28126	Nop16	5
Q9CQ49	68092	Ncbp2	5
Q9CQC6	66882	Bzw1	5
Q9CQE8	68045	Rtraf	5
Q9CQG2	67493	Mettl16	5
Q9CR57	67115	Rpl14	5
Q9CWX9	67755	Ddx47	5
Q9CXW4	67025	Rpl11	5
Q9CY58	66870	Serbp1	5
Q9CYI4	66978	Luc7l	5
Q9CZ96	67197	Zcrb1	5
Q9CZB3	72167	Thumpd2	5
Q9CZM2	66480	Rpl15	5
Q9CZU3	72198	Mtrex	5
Q9D0B0	108014	Srsf9	5
Q9D0T1	20826	Snu13	5
Q9D1R9	68436	Rpl34	5
Q9D2E2	68276	Toe1	5
Q9D4J7	70998	Phf6	5
Q9D554	75062	Sf3a3	5
Q9D6T0	66394	Nosip	5
Q9D6Z1	67134	Nop56	5
Q9D735	68544	Trir	5
Q9D753	69639	Exosc8	5
Q9D787	66053	Ppil2	5
Q9D7S7	68028	Rpl22l1	5
Q9D823	67281	Rpl37	5
Q9D8E6	67891	Rpl4	5
Q9DBR1	24128	Xrn2	5
Q9DBZ5	73830	Eif3k	5
Q9DCE5	68083	Pak1ip1	5
Q9DCH4	66085	Eif3f	5
Q9EQ61	64934	Pes1	5
Q9EQB9	170740	Zfp287	5
Q9ER72	27267	Cars	5
Q9ESB3	94175	Hrg	5
Q9ESC8	93736	Aff4	5
Q9JIB4	23894	Gtf2h2	5
Q9JKS5	56541	Habp4	5
Q9JMD0	22680	Zfp207	5
Q9JMG1	59022	Edf1	5
Q9QXA5	50783	Lsm4	5
Q9QZD9	54709	Eif3i	5
Q9R0Q4	56397	Morf4l2	5
Q9R0U0	14105	Srsf10	5
Q9R1C7	56194	Prpf40a	5
Q9WUA2	23874	Farsb	5
Q9Z0N1	26905	Eif2s3x	5
Q9Z1D1	53356	Eif3g	5
Q9Z2X1	98758	Hnrnpf	5
E9PVA8	231659	Gcn1	5
O35737	59013	Hnrnph1	5
P57776	66656	Eef1d	5
P59708	66055	Sf3b6	5
P61358	19942	Rpl27	5
P62313	78651	Lsm6	5
P70333	56258	Hnrnph2	5
Q3TIX9	28035	Usp39	5
Q60809	18983	Cnot7	5
Q61214	13548	Dyrk1a	5
Q6NVF9	432508	Cpsf6	5
Q6PFR5	101214	Tra2a	5
Q8BH44	235431	Coro2b	5
Q8BKH7	227743	Mapkap1	5
Q8BUK6	320191	Hook3	5
Q8R1B4	56347	Eif3c	5
Q8VDJ3	110611	Hdlbp	5
Q8VEK3	51810	Hnrnpu	5
Q99020	15384	Hnrnpab	5
Q99NB9	81898	Sf3b1	5
Q9CQF3	68219	Nudt21	5
Q9CXK9	381626	Rbm33	5
Q9D8N0	67160	Eef1g	5
Q9WTX2	23992	Prkra	5
Q9Z1Q9	22321	Vars	5
O08807	53381	Prdx4	6
P08003	12304	Pdia4	6
P12023	11820	App	6
P35846	14275	Folr1	6
P55302	16976	Lrpap1	6
P70663	13602	Sparcl1	6
Q2HXL6	66967	Edem3	6
Q3UV71	387314	Tmtc1	6
Q61147	12870	Cp	6
Q61595	16709	Ktn1	6
Q62165	13138	Dag1	6
Q62186	20832	Ssr4	6
Q62313	22134	Tgoln1	6
Q6GQT9	211548	Nomo1	6
Q80WJ7	67154	Mtdh	6
Q8BGT0	14628	Ostm1	6
Q8BH43	242687	Wasf2	6
Q8BMK4	216197	Ckap4	6
Q8BMP6	170760	Acbd3	6
Q8BUV8	277463	Gpr107	6
Q8BXB6	101488	Slco2b1	6
Q8CFG0	72043	Sulf2	6
Q8K1B8	108101	Fermt3	6
Q8K297	234407	Colgalt1	6
Q8R0F3	58911	Sumf1	6
Q8VC69	18399	Slc22a6	6
Q922Q9	68038	Chid1	6
Q99LH2	19210	Ptdss1	6
Q99PL5	81910	Rrbp1	6
Q9CQC9	66397	Sar1b	6
Q9CXI5	74840	Manf	6
Q9CY50	107513	Ssr1	6
Q9D0K1	72129	Pex13	6
Q9D1L9	68576	Lamtor5	6
Q9D3L0	67698	Fam174a	6
Q9EPK6	81500	Sil1	6
Q9ER65	64085	Clstn2	6
Q9JHK5	56193	Plek	6
Q9R0E1	26433	Plod3	6
Q9WUZ9	12499	Entpd5	6
Q9Z2L6	17330	Minpp1	6
A2AFS3	229722	Elapor1	6
A6X919	244745	Dpy19l1	6
B2B9E1	208820	Triqk	6
E9Q735	140630	Ube4a	6
O08601	17777	Mttp	6
O08795	19089	Prkcsh	6
O35623	12068	Bet1	6
O35684	20713	Serpini1	6
O35887	12321	Calu	6
O54692	26951	Zw10	6
O54734	13200	Ddost	6
O55022	53328	Pgrmc1	6
O70152	13480	Dpm1	6
O70378	18117	Emc8	6
O88455	13360	Dhcr7	6
O88587	12846	Comt	6
O88693	22234	Ugcg	6
P01887	12010	B2m	6
P05555	16409	Itgam	6
P06800	19264	Ptprc	6
P09103	18453	P4hb	6
P11835	16414	Itgb2	6
P14211	12317	Calr	6
P16406	13809	Enpep	6
P19324	12406	Serpinh1	6
P20029	14828	Hspa5	6
P21447	18671	Abcb1a	6
P22005	18619	Penk	6
P24369	19035	Ppib	6
P27090	21808	Tgfb2	6
P27545	93898	Cers1	6
P27773	14827	Pdia3	6
P35564	12330	Canx	6
P46978	16430	Stt3a	6
P47867	20255	Scg3	6
P60882	269878	Megf8	6
P62342	69227	Selenot	6
P97449	16790	Anpep	6
P98154	13356	Dgcr2	6
Q02819	18220	Nucb1	6
Q07646	17294	Mest	6
Q0VDN7	217201	Rundc1	6
Q149L6	70604	Dnajb14	6
Q31125	14977	Slc39a7	6
Q3TAS6	69683	Emc10	6
Q3TDQ1	68292	Stt3b	6
Q3TMP8	74166	Tmem38a	6
Q3TUA9	74653	Pomk	6
Q3UBX0	68539	Tmem109	6
Q3UDW8	52120	Hgsnat	6
Q3UM18	224092	Lsg1	6
Q3UUQ7	241062	Pgap1	6
Q3UZV7	231014	Elapor2	6
Q3V188	19011	Endou	6
Q3V209	72053	Tmub2	6
Q4PJX1	226499	Odr4	6
Q4QQM4	277414	Trp53i11	6
Q5KU39	218035	Vps41	6
Q5M9N4	110417	Pigh	6
Q5SSH8	192986	Cyb5d2	6
Q5SZV5	210108	D130043K22Rik	6
Q5U419	69572	Mfsd3	6
Q5XJV6	381983	Lmtk3	6
Q5XKN4	67767	Jagn1	6
Q61207	19156	Psap	6
Q61263	20652	Soat1	6
Q61503	23959	Nt5e	6
Q6GQT6	235623	Scap	6
Q6IQX7	74241	Chpf	6
Q6P5E4	320011	Uggt1	6
Q6PD26	276846	Pigs	6
Q6TCG2	75552	Paqr9	6
Q6ZPR5	77626	Smpd4	6
Q6ZQ89	223455	Marchf6	6
Q6ZQI3	109154	Mlec	6
Q7M6Y3	233489	Picalm	6
Q7TN22	70561	Txndc16	6
Q80UM7	57377	Mogs	6
Q80W54	230709	Zmpste24	6
Q80WW9	77006	Ddrgk1	6
Q8BFZ9	244373	Erlin2	6
Q8BG58	74443	P4htm	6
Q8BGQ6	230648	Efcab14	6
Q8BH27	230316	Megf9	6
Q8BHK1	233280	Nipa1	6
Q8BI84	338366	Mia3	6
Q8BIV3	240614	Ranbp6	6
Q8BJ34	223989	Marf1	6
Q8BLF1	320024	Nceh1	6
Q8BM72	110920	Hspa13	6
Q8BNI4	116891	Derl2	6
Q8BP92	26611	Rcn2	6
Q8BPM6	320360	Ric3	6
Q8BR70	77929	Yipf6	6
Q8BRF7	76983	Scfd1	6
Q8BTV1	80286	Tusc3	6
Q8BW41	215494	Pomgnt2	6
Q8BXL7	76688	Arfrp1	6
Q8BXN9	211499	Tmem87a	6
Q8BXQ2	78928	Pigt	6
Q8BYB9	224143	Poglut1	6
Q8BYW9	101351	Eogt	6
Q8C172	241447	Cers6	6
Q8C1Y8	231874	Ccz1	6
Q8C7K6	240334	Pcyox1l	6
Q8C7V8	76457	Ccdc134	6
Q8CAE9	319655	Podxl2	6
Q8CCJ3	67490	Ufl1	6
Q8CI66	69106	Stoml1	6
Q8CIB6	70612	Tmem230	6
Q8CIF6	214597	Sidt2	6
Q8K1X4	105855	Nckap1l	6
Q8K2A8	208624	Alg3	6
Q8K2C7	216440	Os9	6
Q8K2C9	57874	Hacd3	6
Q8K2W3	106200	Txndc11	6
Q8K449	217262	Abca9	6
Q8R180	50527	Ero1a	6
Q8R2Y3	227697	Dolk	6
Q8R3Q0	67887	Saraf	6
Q8VBT0	72736	Tmx1	6
Q8VBZ3	56457	Clptm1	6
Q8VC42	76482	Rmc1	6
Q8VCH6	74754	Dhcr24	6
Q8VHC3	114679	Selenom	6
Q8VHE0	140740	Sec63	6
Q91W90	105245	Txndc5	6
Q91WB2	227721	Plpp7	6
Q91WE6	68916	Cdkal1	6
Q91XD7	171508	Creld1	6
Q91YQ5	103963	Rpn1	6
Q91YT2	193670	Rnf185	6
Q91YW3	100037258	Dnajc3	6
Q921L3	68944	Tmco1	6
Q922Q8	98238	Lrrc59	6
Q922R8	71853	Pdia6	6
Q99J21	94178	Mcoln1	6
Q99J56	67819	Derl1	6
Q99JH7	232370	Clstn3	6
Q99KI3	66087	Emc3	6
Q99LC9	224824	Pex6	6
Q99LI2	229725	Clcc1	6
Q99LM2	80280	Cdk5rap3	6
Q99LR1	76192	Abhd12	6
Q99M96	64213	St7	6
Q9CPT4	28106	Mydgf	6
Q9CQB5	67006	Cisd2	6
Q9CQF9	66881	Pcyox1	6
Q9CQG6	69804	Tmem147	6
Q9CQU0	66073	Txndc12	6
Q9CR89	67456	Ergic2	6
Q9CRA5	66629	Golph3	6
Q9CXE7	73130	Tmed5	6
Q9CY27	106529	Tecr	6
Q9CYN2	66624	Spcs2	6
Q9CZX9	68032	Emc4	6
Q9D024	67163	Ccdc47	6
Q9D074	17237	Mgrn1	6
Q9D328	67564	Tmem35a	6
Q9D6J1	67260	Cers4	6
Q9D7N9	71881	Apmap	6
Q9D8C2	66109	Tspan13	6
Q9D8T4	67510	Tvp23b	6
Q9DAU1	72029	Cnpy3	6
Q9DBE8	56737	Alg2	6
Q9DBG7	67398	Srpr	6
Q9DBH5	66890	Lman2	6
Q9DBY1	74126	Syvn1	6
Q9DC11	67448	Plxdc2	6
Q9DC16	67458	Ergic1	6
Q9DC23	66861	Dnajc10	6
Q9EP72	73024	Emc7	6
Q9EPE9	170759	Atp13a1	6
Q9EPL2	65945	Clstn1	6
Q9EQH2	80898	Erap1	6
Q9ER58	94214	Spock2	6
Q9ERE7	67943	Mesd	6
Q9ERR7	93684	Selenof	6
Q9ESP1	64136	Sdf2l1	6
Q9JJJ7	53627	Porcn	6
Q9JJZ4	56228	Ube2j1	6
Q9JKR6	12282	Hyou1	6
Q9QXT0	56530	Cnpy2	6
Q9QY76	56491	Vapb	6
Q9QYI4	56709	Dnajb12	6
Q9R049	23802	Amfr	6
Q9R099	27368	Tbl2	6
Q9R0M4	27205	Podxl	6
Q9WTK3	14731	Gpaa1	6
Q9WUQ2	50907	Preb	6
Q9WV55	30960	Vapa	6
Q9Z0R6	20403	Itsn2	6
Q9Z2A7	13350	Dgat1	6
Q9Z2E9	14705	Bscl2	6
Q9Z2G6	20338	Sel1l	6
G5E897	68304	Poglut3	6
P45878	14227	Fkbp2	6
P57759	67397	Erp29	6
Q06335	11804	Aplp2	6
Q3UW53	63913	Niban1	6
Q64676	22239	Ugt8a	6
Q7TNI2	67937	Tmem59l	6
Q80XH1	75620	Kxd1	6
Q8BGI5	74043	Pex26	6
Q8BHN3	14376	Ganab	6
Q8BKV0	72902	Spock3	6
Q8BMQ8	270096	Mon1b	6
Q8BQ47	66455	Cnpy4	6
Q8BX90	319448	Fndc3a	6
Q8BXV2	76809	Bri3bp	6
Q8BZ36	72772	Rint1	6
Q8R5L3	269338	Vps39	6
Q8VCM8	103425	Ncln	6
Q91ZV0	338320	Mia2	6
Q91ZW2	140484	Pofut1	6
Q99KV1	67838	Dnajb11	6
Q9CQS8	66212	Sec61b	6
Q9CRD2	66736	Emc2	6
Q9CZJ9	76594	Dnajc18	6
Q9D1Q6	76299	Erp44	6
Q9D6W8	71923	Borcs6	6
Q9D8V7	66286	Sec11c	6
Q9DBG6	20014	Rpn2	6
Q9JLL0	50766	Crim1	6
Q9JLR1	57743	Sec61a2	6
Q9Z329	16439	Itpr2	6
E9Q3C1	207781	C2cd2	7
O08547	20333	Sec22b	7
O08914	14073	Faah	7
O09005	13244	Degs1	7
O35166	56494	Gosr2	7
O35188	20312	Cx3cl1	7
O35425	51800	Bok	7
O35454	26372	Clcn6	7
O35465	14232	Fkbp8	7
O35954	18739	Pitpnm1	7
O54984	56495	Get3	7
O55143	11938	Atp2a2	7
O70252	15369	Hmox2	7
O70439	53331	Stx7	7
O88307	20660	Sorl1	7
O88384	53612	Vti1b	7
O88983	55943	Stx8	7
O89116	53611	Vti1a	7
P28663	17957	Napb	7
P35279	19346	Rab6a	7
P35821	19246	Ptpn1	7
P46460	18195	Nsf	7
P46638	19326	Rab11b	7
P51150	19349	Rab7	7
P51791	12725	Clcn3	7
P53994	59021	Rab2a	7
P56395	109672	Cyb5a	7
P59279	76338	Rab2b	7
P59481	214895	Lman2l	7
P70280	20955	Vamp7	7
P70302	20866	Stim1	7
P83093	116873	Stim2	7
P97467	18484	Pam	7
P98200	50769	Atp8a2	7
Q06180	19255	Ptpn2	7
Q2TBE6	84095	Pi4k2a	7
Q3TDN2	76577	Faf2	7
Q3TFD2	210992	Lpcat1	7
Q3TRM4	50767	Pnpla6	7
Q3TWI9	224807	Tmem63b	7
Q3TYD6	231876	Lmtk2	7
Q3TYP4	320587	Tmem88b	7
Q3U1N2	20788	Srebf2	7
Q3U3R4	76483	Lmf1	7
Q3U4G3	268880	Xxylt1	7
Q3U9G9	98386	Lbr	7
Q3UBG2	98496	Pid1	7
Q3UHI4	382620	Tmed8	7
Q3UHK1	239606	Slc2a13	7
Q3UN02	225010	Lclat1	7
Q3UVK0	226090	Ermp1	7
Q3UX43	433667	Ankrd13c	7
Q4VBD2	231225	Tapt1	7
Q52KR2	269473	Lrig2	7
Q5DU28	270109	Pcnx2	7
Q5SS80	70451	Dhrs13	7
Q5SYL3	72503	2610507B11Rik	7
Q61112	20318	Sdf4	7
Q61418	12727	Clcn4	7
Q62351	22042	Tfrc	7
Q64322	18146	Npdc1	7
Q64343	11307	Abcg1	7
Q64430	11977	Atp7a	7
Q6DVA0	224640	Lemd2	7
Q6P6J9	69672	Txndc15	7
Q6PB70	382014	Ano8	7
Q6PDC0	242819	Rundc3b	7
Q6PHU5	20661	Sort1	7
Q6QD59	224630	Bnip1	7
Q6TEK5	69568	Vkorc1l1	7
Q78IS1	66111	Tmed3	7
Q7TNV1	68952	Tlcd3b	7
Q80UU9	70804	Pgrmc2	7
Q80XR2	235574	Atp2c1	7
Q80ZW2	223626	Them6	7
Q8BFT9	68666	Svop	7
Q8BGD5	78070	Cpt1c	7
Q8BHA1	378937	Lrrc24	7
Q8BHH2	319642	Rab9b	7
Q8BJ48	27426	Nagpa	7
Q8BLV3	236727	Slc9a7	7
Q8BNJ3	226518	Nmnat2	7
Q8BTJ4	224794	Enpp4	7
Q8BTY8	212986	Scfd2	7
Q8BVI5	228960	Stx16	7
Q8BXR5	338370	Nalcn	7
Q8BXZ1	67988	Tmx3	7
Q8C561	320506	Lmbrd2	7
Q8C7X2	230866	Emc1	7
Q8C863	16396	Itch	7
Q8CB44	223752	Gramd4	7
Q8JZM4	227325	Dner	7
Q8K0C4	13121	Cyp51	7
Q8K1E0	56389	Stx5a	7
Q8K2P7	105727	Slc38a1	7
Q8K448	217265	Abca5	7
Q8R079	67118	Bfar	7
Q8R0X7	20397	Sgpl1	7
Q8R1V4	103694	Tmed4	7
Q8R1Z9	75212	Rnf121	7
Q8R2Y0	66082	Abhd6	7
Q8R3I2	67216	Mboat2	7
Q8VDG7	100163	Pafah2	7
Q8VDP6	52858	Cdipt	7
Q8VEH3	68724	Arl8a	7
Q8VEK2	215160	Rhbdd2	7
Q91V41	68365	Rab14	7
Q91XE8	235043	Tmem205	7
Q91ZH7	106861	Abhd3	7
Q91ZR1	19342	Rab4b	7
Q99J23	80860	Ghdc	7
Q99JH8	68137	Kdelr1	7
Q99JP7	207182	Ggt7	7
Q99K23	192169	Ufsp2	7
Q99KF1	67511	Tmed9	7
Q99KN9	216705	Clint1	7
Q99KU0	75909	Vmp1	7
Q99L43	110911	Cds2	7
Q99MR3	83704	Slc12a9	7
Q99PD7	94249	Slc24a3	7
Q9CPV9	70839	P2ry12	7
Q9CQ56	67023	Use1	7
Q9CQE7	66366	Ergic3	7
Q9CQW0	66048	Emc6	7
Q9CR67	67878	Tmem33	7
Q9CRY7	66569	Gdpd1	7
Q9CWP6	76763	Mospd2	7
Q9CWZ7	108123	Napg	7
Q9CXR1	66375	Dhrs7	7
Q9CZW4	74205	Acsl3	7
Q9CZX7	72519	Pip4p2	7
Q9D1D4	68581	Tmed10	7
Q9D1G3	74770	Hhatl	7
Q9D1X9	77975	Tmem50b	7
Q9D3B1	70757	Hacd2	7
Q9D517	28169	Agpat3	7
Q9D850	72098	Tmem68	7
Q9DB05	108124	Napa	7
Q9DB25	66248	Alg5	7
Q9DBS1	74122	Tmem43	7
Q9EQ06	114664	Hsd17b11	7
Q9EQJ0	252972	Tpcn1	7
Q9ER00	100226	Stx12	7
Q9ER64	79196	Osbpl5	7
Q9ERN0	24044	Scamp2	7
Q9ERY9	58520	Erg28	7
Q9ET77	57340	Jph3	7
Q9JIS8	20498	Slc12a4	7
Q9JIZ0	66116	Nat8f1	7
Q9JJ61	108760	Galnt16	7
Q9JJE4	76498	Paqr4	7
[truncated: 3,899 more rows]

## Sheet: Module Results
Module Information		Statistical Difference in Module Level: Mutant vs. Control
Module	nProteins	Contrast	log2(FoldChange)	percentControl	SE	Tstatistic	Pvalue	FDR	Padjust	DF	S2	candidate
M28	88	Mutant-Control	-0.107553	0.928161	0.00876617	-12.2691	6.27275e-34	1.83961e-32	3.07365e-32	3595	0.0710055	TRUE
M6	267	Mutant-Control	0.0590914	1.04181	0.00485584	12.1692	7.5086e-34	1.83961e-32	3.67921e-32	10934	0.0661041	TRUE
M22	101	Mutant-Control	-0.0949781	0.936286	0.0082762	-11.4761	4.94487e-30	8.07662e-29	2.42298e-28	4128	0.0726394	TRUE
M38	57	Mutant-Control	-0.122141	0.918823	0.0109679	-11.1362	4.24026e-28	5.19432e-27	2.07773e-26	2324	0.0719963	TRUE
M39	55	Mutant-Control	0.109333	1.07873	0.0104055	10.5072	3.05675e-25	2.99562e-24	1.49781e-23	2242	0.0625284	TRUE
M23	101	Mutant-Control	-0.0836342	0.943678	0.00808961	-10.3385	9.43795e-25	7.70766e-24	4.62459e-23	4128	0.069401	TRUE
M1	359	Mutant-Control	-0.0267584	0.981623	0.00279827	-9.56247	1.32867e-21	9.30071e-21	6.5105e-20	14706	0.0295163	TRUE
M24	98	Mutant-Control	0.080131	1.05711	0.00860463	9.31255	2.00375e-20	1.2273e-19	9.81837e-19	4005	0.0761868	TRUE
M12	177	Mutant-Control	-0.049515	0.966261	0.00565728	-8.75243	2.56653e-18	1.39733e-17	1.2576e-16	7244	0.059481	TRUE
M36	61	Mutant-Control	0.0861589	1.06154	0.0104496	8.24515	2.63787e-16	1.29256e-15	1.29256e-14	2488	0.0699394	TRUE
M15	150	Mutant-Control	0.0431881	1.03039	0.00527697	8.18425	3.30291e-16	1.47129e-15	1.61842e-14	6137	0.0438581	TRUE
M2	357	Mutant-Control	-0.0444269	0.969675	0.00568606	-7.81331	5.94819e-15	2.42884e-14	2.91461e-13	14624	0.121194	TRUE
M34	70	Mutant-Control	-0.0453002	0.969088	0.0058891	-7.69222	1.97617e-14	7.44863e-14	9.68323e-13	2857	0.0254909	TRUE
M27	91	Mutant-Control	-0.0590738	0.95988	0.00857355	-6.89024	6.51389e-12	2.27986e-11	3.1918e-10	3718	0.0702348	TRUE
M29	86	Mutant-Control	-0.0427415	0.970808	0.00685681	-6.23344	5.10436e-10	1.66743e-09	2.50114e-08	3513	0.0424553	TRUE
M40	51	Mutant-Control	-0.0757389	0.948856	0.0125103	-6.05411	1.67086e-09	5.11701e-09	8.18722e-08	2078	0.08381	TRUE
M18	142	Mutant-Control	-0.0516458	0.964835	0.00865472	-5.96735	2.55373e-09	7.36075e-09	1.25133e-07	5809	0.111682	TRUE
M35	66	Mutant-Control	-0.053777	0.963411	0.00973459	-5.52432	3.62411e-08	9.86564e-08	1.77582e-06	2693	0.0656702	TRUE
M21	104	Mutant-Control	-0.0446473	0.969527	0.0088828	-5.02626	5.20699e-07	1.34286e-06	2.55143e-05	4251	0.0861633	TRUE
M17	147	Mutant-Control	0.0261393	1.01828	0.00590048	4.43003	9.58902e-06	2.34931e-05	0.000469862	6014	0.053738	TRUE
M43	18	Mutant-Control	0.0855619	1.0611	0.0204459	4.1848	3.19614e-05	7.45766e-05	0.00156611	742	0.0790083	TRUE
M41	46	Mutant-Control	-0.0447391	0.969465	0.0115879	-3.86085	0.000116736	0.000260003	0.00572008	1918	0.0648567	TRUE
M11	178	Mutant-Control	-0.0180437	0.987571	0.00497843	-3.62438	0.000291625	0.000621288	0.0142896	7285	0.0463227	TRUE
M30	83	Mutant-Control	-0.0231385	0.98409	0.00776177	-2.98109	0.00289221	0.00574163	0.141718	3472	0.0525036	FALSE
M47	8	Mutant-Control	-0.0870583	0.94144	0.0290342	-2.99848	0.0029294	0.00574163	0.143541	315	0.0708105	FALSE
M5	268	Mutant-Control	0.0115347	1.00803	0.00415412	2.77668	0.00550103	0.0103673	0.269551	10975	0.0485605	FALSE
M4	278	Mutant-Control	-0.0110179	0.992392	0.00405478	-2.71727	0.00659229	0.0119638	0.323022	11385	0.047992	FALSE
M9	192	Mutant-Control	0.0167018	1.01164	0.00645337	2.58808	0.00966911	0.016921	0.473787	7859	0.0839583	FALSE
M25	95	Mutant-Control	0.0222079	1.01551	0.00867827	2.55902	0.0105343	0.0177994	0.516183	3882	0.0751241	FALSE
M33	78	Mutant-Control	0.0195636	1.01365	0.0102067	1.91674	0.0553602	0.0904216	1	3185	0.0853208	FALSE
M19	120	Mutant-Control	-0.0183294	0.987375	0.00996621	-1.83916	0.0659526	0.104248	1	4907	0.12515	FALSE
M26	95	Mutant-Control	0.0142142	1.0099	0.00927116	1.53316	0.125317	0.191892	1	3882	0.0857395	FALSE
M14	159	Mutant-Control	-0.00671919	0.995353	0.00489129	-1.37371	0.16958	0.251801	1	6506	0.0399423	FALSE
M16	147	Mutant-Control	0.00834693	1.0058	0.00630772	1.32329	0.18579	0.267756	1	6014	0.0614117	FALSE
M10	191	Mutant-Control	0.00487721	1.00339	0.00421988	1.15577	0.24781	0.346934	1	7818.05	0.0357127	FALSE
M7	209	Mutant-Control	0.00547528	1.0038	0.0048338	1.13271	0.257369	0.350307	1	8556	0.0512758	FALSE
M37	58	Mutant-Control	-0.0154615	0.98934	0.0141335	-1.09396	0.274084	0.362975	1	2365	0.121651	FALSE
M44	18	Mutant-Control	-0.0128554	0.991129	0.0133719	-0.961379	0.336682	0.434143	1	725	0.0337944	FALSE
M8	193	Mutant-Control	-0.00569689	0.996059	0.00667586	-0.853357	0.393487	0.494381	1	7900	0.0903151	FALSE
M45	15	Mutant-Control	0.00956985	1.00666	0.0207072	0.462151	0.64414	0.773416	1	602	0.0675341	FALSE
M42	30	Mutant-Control	0.00426188	1.00296	0.00975964	0.436685	0.662416	0.773416	1	1246	0.0300039	FALSE
M46	14	Mutant-Control	0.012796	1.00891	0.029342	0.4361	0.662928	0.773416	1	574	0.12656	FALSE
M32	81	Mutant-Control	-0.00350276	0.997575	0.0102414	-0.342021	0.732357	0.813834	1	3308	0.0892052	FALSE
M31	82	Mutant-Control	-0.00322918	0.997764	0.0097789	-0.330219	0.741255	0.813834	1	3430	0.0823347	FALSE
M48	7	Mutant-Control	-0.00507451	0.996489	0.0170855	-0.297007	0.766681	0.813834	1	280	0.0214556	FALSE
M3	290	Mutant-Control	0.00171087	1.00119	0.00588318	0.290807	0.771204	0.813834	1	11877	0.105393	FALSE
M13	172	Mutant-Control	-0.00176532	0.998777	0.00633806	-0.278527	0.780616	0.813834	1	7039	0.0725488	FALSE
M20	110	Mutant-Control	0.00149806	1.00104	0.0063792	0.234836	0.814347	0.831313	1	4497	0.0470018	FALSE
M49	6	Mutant-Control	0.00445892	1.0031	0.0353112	0.126275	0.899621	0.899621	1	238	0.0785535	FALSE
