# Supplementary material for: Genetic disruption of WASHC4 drives endo-lysosomal dysfunction and cognitive-movement impairments in mice and humans
Source: eLife. 2021 Mar 22;10:e61590. doi: 10.7554/eLife.61590 (PMC7984842; doi:10.7554/eLife.61590)
Supplement: Supplementary file 4. — Gene set enrichment statistics for the identified modules (Figure 3, Supplementary file 3). Biological pathway information, including source pathway membership, is provided. [file elife-61590-supp4.xlsx]

## Sheet: Table of Contents
Supplementary Table 4
Experiment: Spatial Proteomics WT vs. MUT mouse brain, Gene Set Enrichment Analysis
Corresponding Figures: 3, 4
Sheet Name	Description
Module GSEA	Gene Set Enrichment Analysis (GSEA) of identified modules
Pathways	All biological pathways used for GSEA analysis

## Sheet: Module GSEA
Module Information		Biological Pathway Information				Enrichment Statistics				Proteins in Module Identified as Part of Pathway
Module	Module Size	Biological Pathway	Total Pathway Genes	N Pathway Genes	n Pathway Genes in Module	Fold enrichment	P-value	FDR	Padjust	Gene Names
M1	359	CORUM: 9S-cytosolic aryl hydrocarbon (Ah) receptor non-ligand activated complex	4	3	3	12.2611	0.000866969	0.0424815	0.0424815	Aip; Hsp90aa1; Hsp90ab1
M1	359	CORUM: Alpha-GDI-Hsp90 chaperone complex, ATP dependent	4	4	3	12.2591	0.000867406	0.0425029	0.0425029	Hsp90aa1; Gdi1; Hspa8
M1	359	CORUM: TBCD-tubulin(alpha)-tubulin(beta) complex	3	3	3	16.3454	0.000227194	0.0111325	0.0111325	Tuba1a; Tubb5; Tbcd
M1	359	LopitDC: CYTOSOL	359	266	145	6.70654	2.16214e-91	1.05945e-89	1.05945e-89	Ttc38; Armt1; Gsto1; Gclm; Capn1; Nudc; Impa1; Rbbp9; Hprt; Got1; Hsp90aa1; Hsp90ab1; Mdh1; Ldhb; Eno2; Tpi1; Eno3; Gfus; Lta4h; Adh5; Akt1; Ppm1b; Tkt; Akr1b3; Adss; Gstm5; Ppm1a; Ahcy; Nat2; Gdi1; Gss; Adk; Usp5; Ptpa; Ube2k; Fgf1; Pfn1; Tuba4a; Tuba1c; Pebp1; Hint1; Sms; Gclc; Uba1; Ckb; Fabp5; Calb2; Npepps; Mat2a; Scrn3; Uap1l1; Smyd5; Otulin; Ttll12; Hdhd2; Ppp1r7; Serpinb6a; Stip1; Asns; C…
M1	359	Uniprot: Cytoplasm, cytosol	240	217	30	2.05118	0.000114564	0.00280682	0.00561364	Ppip5k1; Gsto1; Rgs7; Selenbp1; Fkbp4; Ppm1b; Ppm1a; Nutf2; Ran; Hpca; G6pdx; Ubxn2b; Npepps; Crppa; Fscn1; Dbnl; Ppp3r1; Ube2q1; Ahcyl1; Ahsa1; Nhlrc2; Gpcpd1; Pdxk; As3mt; Dpp3; Mien1; Glrx3; Coro7; Akr1a1; Pdcd6ip
M2	357	CORUM: 28S ribosomal subunit, mitochondrial	29	13	13	7.38839	3.40432e-09	1.66812e-07	1.66812e-07	Mrps21; Mrps26; Mrps27; Mrps23; Mrps16; Mrps22; Mrps30; Mrps9; Mrps11; Mrps34; Mrps6; Mrps15; Dap3
M2	357	CORUM: 39S ribosomal subunit, mitochondrial	48	14	13	4.47747	3.24734e-06	0.00015912	0.00015912	Mrpl38; Mrpl3; Mrpl24; Mrpl44; Mrpl19; Mrpl39; Mrpl40; Mrpl1; Mrpl11; Mrpl45; Mrpl28; Mrpl2; Lactb
M2	357	CORUM: 55S ribosome, mitochondrial	77	27	26	5.59744	1.10382e-13	5.40872e-12	5.40872e-12	Mrps21; Mrps26; Mrps27; Mrpl38; Mrps23; Mrpl3; Mrps16; Mrpl24; Mrps22; Mrpl44; Mrps30; Mrpl19; Mrps9; Mrps11; Mrps34; Mrpl39; Mrpl40; Mrps6; Mrpl1; Mrpl11; Mrpl45; Mrpl28; Mrpl2; Mrps15; Lactb; Dap3
M2	357	CORUM: ATP synthasome	16	8	8	8.22969	1.43782e-06	7.04532e-05	7.04532e-05	ATP6; Slc25a5; Atp5b; Atp5a1; Slc25a3; Atp5c1; Atp5pb; Atp5d
M2	357	CORUM: Cytochrome bc1-complex (EC 1.10.2.2), mitochondrial	10	5	5	8.22549	0.000157733	0.00772893	0.00772893	Uqcrfs1; Uqcrc1; Cyc1; Uqcrb; Uqcrc2
M2	357	CORUM: Cytochrome c oxidase, mitochondrial	22	9	8	5.99032	2.56829e-05	0.00125846	0.00125846	COX2; Surf1; Cox4i1; Cox6a1; Cox6b1; Cox7b; Cox15; Cox6c
M2	357	CORUM: Ecsit complex (ECSIT, MT-CO2, NDUFA1, MT-ND1, TRAF6, NDUFAF1)	6	4	4	10.9617	0.000183029	0.00896843	0.00896843	COX2; ND1; Ndufaf1; Ecsit
M2	357	CORUM: Ecsit complex (ECSIT, NDUFS3, NDUFAF1)	3	3	3	16.437	0.000223408	0.010947	0.010947	Ndufaf1; Ndufs3; Ecsit
M2	357	CORUM: F0F1 ATP synthase, mitochondrial	14	7	7	8.22829	6.8303e-06	0.000334685	0.000334685	ATP6; Atp5b; Atp5a1; Atp5c1; Atp5l; Atp5pb; Atp5d
M2	357	CORUM: Frataxin complex	7	5	5	11.7447	1.53588e-05	0.000752584	0.000752584	Hspd1; Hspa9; Afg3l2; Sdha; Atp5l
M2	357	CORUM: KAT2A-Oxoglutarate dehydrogenase complex	4	3	3	12.3298	0.000852749	0.0417847	0.0417847	Ogdh; Dld; Dlst
M2	357	CORUM: MIB complex	11	8	8	11.9603	2.43284e-08	1.19209e-06	1.19209e-06	Chchd6; Mtx2; Dnajc11; Apool; Micos10; Samm50; Immt; Apoo
M2	357	CORUM: MICOS complex	7	5	5	11.7447	1.53588e-05	0.000752584	0.000752584	Chchd6; Apool; Micos10; Immt; Apoo
M2	357	CORUM: prohibitin 2 complex, mitochondrial	5	5	4	13.1496	6.41754e-05	0.00314459	0.00314459	Phb2; Hax1; Slc25a5; Phb
M2	357	CORUM: Respiratory chain complex I (beta subunit) mitochondrial	16	9	9	9.25683	8.00375e-08	3.92184e-06	3.92184e-06	Ndufb11; ND4; Ndufb6; Ndufa4; Ndufc2; Ndufb9; Ndufb3; Ndufb7; Ndufb10
M2	357	CORUM: Respiratory chain complex I (early intermediate NDUFAF1 assembly), mitochondrial	7	6	6	14.0912	3.23306e-07	1.5842e-05	1.5842e-05	ND1; Ndufb6; Ndufa6; Ndufaf1; Ndufa9; Ndufs3
M2	357	CORUM: Respiratory chain complex I (gamma subunit) mitochondrial	13	5	5	6.33053	0.000689997	0.0338099	0.0338099	ND1; Ndufa10; Ndufs5; Ndufa6; Ndufa9
M2	357	CORUM: Respiratory chain complex I (holoenzyme), mitochondrial	43	26	26	9.96743	1.53476e-21	7.52033e-20	7.52033e-20	Ndufb11; ND1; Ndufs6; Ndufb6; Ndufa4; Ndufa12; Ndufs8; Ndufs1; Ndufs2; Ndufv1; Ndufa10; Ndufa5; Ndufc2; Ndufa2; Ndufb9; Ndufa6; Ndufb3; Ndufb7; Ndufs4; Ndufv2; Ndufa11; Ndufa9; Ndufb10; Ndufs3; Ndufa13; Ndufa7
M2	357	CORUM: Respiratory chain complex I (incomplete intermediate), mitochondrial	11	8	8	11.9603	2.43284e-08	1.19209e-06	1.19209e-06	Ndufs6; Ndufs1; Ndufs2; Ndufv1; Ndufa10; Ndufs4; Ndufv2; Ndufa9
M2	357	CORUM: Respiratory chain complex I (intermediate I/200kD and III/250kD), mitochondrial	3	3	3	16.437	0.000223408	0.010947	0.010947	Ndufs2; Ndufa9; Ndufs3
M2	357	CORUM: Respiratory chain complex I (intermediate IV/310kD), mitochondrial	4	4	4	16.437	1.34845e-05	0.000660739	0.000660739	ND1; Ndufs2; Ndufa9; Ndufs3
M2	357	CORUM: Respiratory chain complex I (intermediate V/380kD and VI/480kD), mitochondrial	5	5	5	16.437	8.11735e-07	3.9775e-05	3.9775e-05	ND1; Ndufs2; Ndufa2; Ndufa9; Ndufs3
M2	357	CORUM: Respiratory chain complex I (intermediate VII/650kD), mitochondrial	9	8	8	14.6131	1.48329e-09	7.26814e-08	7.26814e-08	ND1; Ndufs2; Ndufa2; Ndufa6; Ndufs4; Ndufv2; Ndufa9; Ndufs3
M2	357	CORUM: Respiratory chain complex I (intermediate), mitochondrial	10	9	9	14.7958	9.80846e-11	4.80615e-09	4.80615e-09	ND1; Ndufb6; Ndufs2; Ndufa2; Ndufa6; Ndufs4; Ndufv2; Ndufa9; Ndufs3
M2	357	CORUM: Respiratory chain complex I (lambda subunit) mitochondrial	16	14	14	14.3873	7.9687e-16	3.90466e-14	3.90466e-14	Ndufs6; Ndufa12; Ndufs8; Ndufs1; Ndufs2; Ndufv1; Ndufa5; Ndufa2; Ndufs4; Ndufv2; Ndufa11; Ndufs3; Ndufa13; Ndufa7
M2	357	CORUM: Respiratory chain complex I (nuclear encoded subunits), mitochondrial	33	24	24	11.9725	7.04637e-23	3.45272e-21	3.45272e-21	Ndufb11; Ndufs6; Ndufb6; Ndufa4; Ndufa12; Ndufs8; Ndufs1; Ndufs2; Ndufv1; Ndufa10; Ndufs5; Ndufa5; Ndufc2; Ndufb9; Ndufa6; Ndufb3; Ndufb7; Ndufs4; Ndufa11; Ndufa9; Ndufb10; Ndufs3; Ndufa13; Ndufa7
M2	357	CORUM: Respiratory chain complex I (subcomplex I alpha), mitochondrial	20	15	15	12.3382	5.05393e-15	2.47642e-13	2.47642e-13	Ndufs6; Ndufa12; Ndufs8; Ndufs1; Ndufs2; Ndufv1; Ndufa10; Ndufa5; Ndufa6; Ndufb7; Ndufa11; Ndufa9; Ndufs3; Ndufa13; Ndufa7
M2	357	CORUM: Respiratory chain complex I (subcomplex I beta), mitochondrial	12	7	7	9.59641	1.75782e-06	8.61332e-05	8.61332e-05	Ndufb11; ND4; Ndufb6; Ndufb9; Ndufb3; Ndufb7; Ndufb10
M2	357	CORUM: Respiratory chain complex I, mitochondrial	45	28	28	10.2571	1.28297e-23	6.28656e-22	6.28656e-22	Ndufb11; ND1; ND4; Ndufs6; Ndufb6; Ndufa4; Ndufa12; Ndufs8; Ndufs1; Ndufs2; Ndufv1; Ndufa10; Ndufs5; Ndufa5; Ndufc2; Ndufa2; Ndufb9; Ndufa6; Ndufb3; Ndufb7; Ndufs4; Ndufv2; Ndufa11; Ndufa9; Ndufb10; Ndufs3; Ndufa13; Ndufa7
M2	357	CORUM: SDH-mABC1-PIC-ANT-ATPase complex	6	6	5	13.6975	4.62674e-06	0.00022671	0.00022671	Slc25a4; Atp5a1; Sdha; Slc25a3; Sdhb
M2	357	CORUM: Succinate dehydrogenase complex II, mitochondrial	4	4	3	12.3277	0.000853178	0.0418057	0.0418057	Sdha; Sdhb; Sdhc
M2	357	CORUM: Succinyl-CoA synthetase, ADP-forming	3	3	3	16.437	0.000223408	0.010947	0.010947	Suclg1; Suclg2; Sucla2
M2	357	LopitDC: MITOCHONDRION	450	296	253	9.48376	8.45339e-232	4.14216e-230	4.14216e-230	Hccs; Prdx3; Hspd1; Ogdh; Lrpprc; Glrx5; Mrps26; Tufm; Gpt2; Mrps35; Mrps27; Taco1; Coq9; Mrpl38; Hscb; Bphl; Coq6; Mrps23; Chchd6; Spryd4; Pcca; Me2; Aco2; Hars2; Hibadh; Mrpl3; Mrpl24; Gadd45gip1; Mrps22; Mrpl44; Mrps30; Oxct1; Hint2; Mrpl19; Plgrkt; Idh3a; Mrps9; Mrps11; Mrps34; Sars2; Mrpl39; Ak3; Suclg1; Mrpl40; Mipep; Dld; Phb2; Hax1; Bcat2; Timm44; Nipsnap1; Nipsnap2; Mtx2; Clpp; Yme1l1; A…
M2	357	Uniprot: [Isoform Mitochondrial]: Mitochondrion	4	4	4	16.437	1.34845e-05	0.000660739	0.000660739	Prdx5; Gpx4; Tfam; Fh1
M2	357	Uniprot: Matrix side	36	26	24	10.9767	1.92436e-21	9.42934e-20	9.42934e-20	Timm44; Atp5b; Atp5a1; Tamm41; Ndufb6; Ndufa12; Acad9; Sdha; Atp5c1; Ndufs2; Ndufa5; Ndufc2; Ndufa2; Ndufb9; Ndufa6; Ndufb3; Ndufs4; Uqcrc1; Uqcrb; Ndufa11; Uqcrc2; Ndufb10; Ndufa13; Ndufa7
M2	357	Uniprot: Mitochondrion	195	149	82	6.96614	8.0571e-51	3.94798e-49	3.94798e-49	Prdx3; Mrps21; Mrps26; Tufm; Mrps35; Mrps27; Coq9; Mrpl38; Mcat; Mrps23; Chchd6; Aco2; Hars2; Mrpl3; Mrps16; Mrpl24; Gadd45gip1; Mrps22; Mrpl44; Mrpl19; Mrps9; Mrps11; Mrps34; Mrpl39; Mrpl40; Cisd3; Hax1; Ech1; Mtx2; Yme1l1; Mmut; Glud1; Hspa9; Gfer; Mrps6; Acsf3; Them4; Dnajc11; Abhd10; Apool; Msrb2; Coa6; Samm50; Hadha; Acaa2; Immt; Vwa8; Amt; Acat1; Fahd1; Clybl; Prelid3a; Gcsh; Pycr2; Rtn4ip1…
M2	357	Uniprot: Mitochondrion inner membrane	126	92	80	10.4966	2.60324e-68	1.27559e-66	1.27559e-66	Dmac1; Chchd6; Ndufaf5; Ndufb11; Phb2; Timm44; Yme1l1; COX2; Cox4i1; Fech; Cox6a1; Slc25a4; Acadvl; Slc25a5; Ndufs6; Cox6b1; Cox7b; Atp5b; Mpc1; Phb; Atp5a1; Tamm41; Ndufb6; Spg7; Mcu; Ccdc51; Them4; Tmem65; Mrs2; Ndufa4; Apool; Ndufa12; Micos10; Bdh1; Timm29; Slc25a12; Slc25a29; Hadha; Immt; Rdh13; Acad9; Afg3l2; Sdha; Micu1; Atp5c1; Ndufs2; Stoml2; Sfxn1; Hadhb; Ndufs5; Ndufa5; Cox6c; Ndufc2; N…
M2	357	Uniprot: Mitochondrion intermembrane space	17	14	11	10.6411	3.21879e-10	1.57721e-08	1.57721e-08	Gfer; Them4; Clpb; Coa6; Pnpt1; Micu1; Stoml2; Ndufs5; Ndufb7; Agk; Aifm1
M2	357	Uniprot: Mitochondrion matrix	64	54	46	11.8342	8.62035e-43	4.22397e-41	4.22397e-41	Hspd1; Ogdh; Glrx5; Pcca; Mtres1; Sars2; Dld; Clpp; Mdh2; Mmut; Pdha1; Hmgcl; Eci1; Acadm; H2-Ke6; Acadl; Acads; Hadh; Hspe1; Bdh1; Supv3l1; Dglucy; Echs1; Maip1; Dars2; Lonp1; Pnpt1; Pitrm1; Poldip2; Cbr4; Mlycd; Ndufa10; Etfa; Pccb; Acss1; Ndufaf1; Pmpcb; Wars2; Dlst; Acadsb; Ndufa9; Ethe1; Etfb; Ivd; Pdk2; Acot2
M2	357	Uniprot: Mitochondrion matrix, mitochondrion nucleoid	7	6	4	9.39416	0.000406856	0.019936	0.019936	Tfam; Supv3l1; Fastkd2; Shmt2
M2	357	Uniprot: Single-pass membrane protein	82	69	14	3.20316	8.45974e-05	0.00414528	0.00414528	Ndufb11; Cox4i1; Cox6a1; Cox7b; Ndufa4; Micos10; Timm29; Ptges2; Cox6c; Ndufb3; Uqcrfs1; Cyc1; Timm50; Ndufa13
M3	290	CORUM: 17S U2 snRNP	30	26	7	4.7246	0.000507989	0.0124457	0.0248914	U2af2; U2surp; Cherp; Rbm17; Sf3a1; Sf3b4; Snrpb2
M3	290	CORUM: 5FMC (Friends of Methylated Chtop) complex	5	5	4	16.1876	2.81021e-05	0.001377	0.001377	Las1l; Tex10; Pelp1; Senp3
M3	290	CORUM: Apoptosis- and splicing-associated protein complex (ASAP-L), SAP18, RNPS1, Acinus-L	3	3	3	20.2345	0.00011952	0.00585647	0.00585647	Sap18; Rnps1; Acin1
M3	290	CORUM: BBS4 centriolar satellite complex	3	3	3	20.2345	0.00011952	0.00585647	0.00585647	Cep131; Bbs4; Pcm1
M3	290	CORUM: CCR4-NOT complex	9	8	4	8.99464	0.000603944	0.0295932	0.0295932	Cnot10; Cnot2; Cnot3; Cnot11
M3	290	CORUM: CCR4-NOT-CNOT7-CNOT6 complex	9	8	4	8.99464	0.000603944	0.0295932	0.0295932	Cnot10; Cnot2; Cnot3; Cnot11
M3	290	CORUM: CCR4-NOT-CNOT7-CNOT6L complex	9	9	4	8.9931	0.000604335	0.0296124	0.0296124	Cnot10; Cnot2; Cnot3; Cnot11
M3	290	CORUM: CCR4-NOT-CNOT8-CNOT6 complex	9	7	4	8.99617	0.000603553	0.0295741	0.0295741	Cnot10; Cnot2; Cnot3; Cnot11
M3	290	CORUM: CCR4-NOT-CNOT8-CNOT6L complex	9	8	4	8.99464	0.000603944	0.0295932	0.0295932	Cnot10; Cnot2; Cnot3; Cnot11
M3	290	CORUM: CDC5L complex	28	22	7	5.06379	0.000321034	0.00786532	0.0157306	Cdc5l; Sf3b4; Sfpq; Plrg1; Prpf19; Ilf2; Rbmx
M3	290	CORUM: DCS complex	4	4	3	15.1759	0.000460534	0.0225661	0.0225661	Ptbp1; Khsrp; Ptbp2
M3	290	CORUM: Decapping complex	5	5	5	20.2345	2.8525e-07	1.39773e-05	1.39773e-05	Ddx6; Edc4; Edc3; Dcp1a; Dcp2
M3	290	CORUM: DGCR8 multiprotein complex	10	9	4	8.09517	0.000967616	0.0474132	0.0474132	Dhx9; Ddx17; Ddx5; Ilf3
M3	290	CORUM: Drosha complex	8	7	4	10.119	0.000349056	0.0171037	0.0171037	Ddx17; Ddx5; Tardbp; Hnrnpm
M3	290	CORUM: Exon junction complex (EIF4A3, MLN51, MAGOH, Y14)	4	3	3	15.1784	0.000460301	0.0225548	0.0225548	Casc3; Eif4a3; Rbm8a
M3	290	CORUM: hTREX84 complex	6	6	5	16.8621	1.64217e-06	8.04664e-05	8.04664e-05	Thoc2; Thoc6; Thoc7; Thoc5; Thoc1
M3	290	CORUM: HuR-Tia1-Tiar-Hrnpu complex	4	4	3	15.1759	0.000460534	0.0225661	0.0225661	Tia1; Tial1; Elavl1
M3	290	CORUM: IGF2BP1 complex	9	8	5	11.2433	3.04454e-05	0.00149182	0.00149182	Dhx9; Ybx1; Elavl1; Syncrip; Stau1
M3	290	CORUM: Large Drosha complex	18	16	8	8.99617	9.1512e-07	4.48409e-05	4.48409e-05	Ddx17; Ddx5; Raly; Tardbp; Ilf2; Hnrnpm; Hnrnpdl; Ilf3
M3	290	CORUM: LAS1L-PELP1-TEX10-WDR18-NOL9-SENP3 complex	6	6	5	16.8621	1.64217e-06	8.04664e-05	8.04664e-05	Las1l; Nol9; Tex10; Pelp1; Senp3
M3	290	CORUM: MNK1-eIF4F complex	4	4	3	15.1759	0.000460534	0.0225661	0.0225661	Mknk1; Eif4e; Eif4g1
M3	290	CORUM: p54(nrb)-PSF-matrin3 complex	3	3	3	20.2345	0.00011952	0.00585647	0.00585647	Matr3; Sfpq; Nono
M3	290	CORUM: Polyadenylation complex (CSTF1, CSTF2, CSTF3, SYMPK CPSF1, CPSF2, CPSF3)	7	7	5	14.4532	5.51502e-06	0.000270236	0.000270236	Cpsf2; Sympk; Cstf1; Cstf3; Cpsf1
M3	290	CORUM: Spliceosome	128	108	44	6.97931	1.38647e-26	6.79369e-25	6.79369e-25	Thoc2; Mfap1b; Eftud2; Dhx9; U2af2; Pabpc1; Crnkl1; Rbm15; Smu1; Ncbp1; Ddx17; Thoc6; Prpf4b; Ddx5; Cdc5l; U2surp; Snrnp200; Snrnp40; Thoc7; Rbm22; Thoc5; Ppwd1; Aqr; Tcerg1; Rbm17; Sf3a1; Sf3b4; Thoc1; Eif4a3; Prpf6; Plrg1; Wbp11; Prpf19; Rnps1; Prpf8; Snrpb2; Snw1; Rbm8a; Ppil1; Cdc40; Xab2; Acin1; Ik; Ddx39b
M3	290	CORUM: THO complex	5	5	5	20.2345	2.8525e-07	1.39773e-05	1.39773e-05	Thoc2; Thoc6; Thoc7; Thoc5; Thoc1
M3	290	CORUM: TRAPP complex	14	11	9	13.0145	2.49546e-09	1.22278e-07	1.22278e-07	Trappc11; Trappc3; Trappc10; Trappc9; Trappc1; Trappc12; Trappc5; Trappc6b; Trappc4
M3	290	LopitDC: NUCLEUS/CHROMATIN	1210	574	141	2.61346	9.14239e-33	4.47977e-31	4.47977e-31	Arglu1; Med14; Las1l; Thoc2; Mfap1b; Safb; Eftud2; Cpsf2; Pnn; Sap18; Zfp326; Zfr; Hnrnpa2b1; Ptbp1; U2af2; Tia1; Exosc10; Smg6; Hnrnpk; Eif4e; Crnkl1; Surf6; Tial1; Elavl1; Erh; Smn1; Rbbp6; Hnrnpul2; Zc3h18; Rbm15; Bzw2; Khdc4; Nol9; Khsrp; Smu1; Tex10; Ncbp1; Ddx17; Thoc6; Hnrnpd; Khdrbs1; Prpf4b; Ddx5; Raly; Cdc5l; U2surp; Zc3h11a; Eif4g1; Rbm26; Snrnp200; Smchd1; Snrnp40; Ctif; Rbm15b; Thoc7…
M3	290	Uniprot: Cytoplasm, P-body	26	25	14	10.8973	2.14992e-12	1.05346e-10	1.05346e-10	Rc3h2; Ddx6; Eif4e; Patl1; Tnrc6a; Edc4; Pum1; Tnrc6b; Shfl; Cnot3; Lsm14a; Dcp1a; Dcp2; Upf1
M3	290	Uniprot: Cytoplasm, Stress granule	26	25	11	8.5622	1.41379e-08	6.92756e-07	6.92756e-07	Pabpc1; Fmr1; Tia1; Eif4e; Elavl1; Prrc2c; Eif4g1; Lsm14a; Casc3; Dhx36; Tardbp
M3	290	Uniprot: Cytoplasmic granule	24	22	9	7.59052	1.0515e-06	5.15236e-05	5.15236e-05	Hnrnpa2b1; Ybx1; Tial1; Smn1; Atxn2l; Pum2; Pum1; Mbnl1; Pcm1
M3	290	Uniprot: Cytoplasmic vesicle, COPII-coated vesicle membrane	10	10	5	10.1172	5.8483e-05	0.00286566	0.00286566	Sec23a; Sec24a; Sec31a; Sec13; Sec23b
M3	290	Uniprot: Nucleus	880	756	90	2.11798	2.46582e-13	1.20825e-11	1.20825e-11	Mfap1b; Safb; Alyref; Eftud2; Dnajb6; Sap18; Dhx9; Ttc3; Hnrnpa2b1; Pabpc1; Fmr1; Hnrnpa1; Tia1; Ddx6; Exosc10; Ybx1; Eif4e; Crnkl1; Tial1; Elavl1; Erh; Hnrnpul2; Patl1; Khdc4; Nol9; Edc4; Smu1; Btrc; Ncbp1; Ddx17; Hnrnpd; Khdrbs1; Ddx5; Raly; Cdc5l; Snrnp200; Snrnp40; Bud31; Syncrip; Thoc7; Cpeb3; Rbm22; Thoc5; Cpsf7; Rbm14; Shfl; Pabpn1; Ppwd1; Aqr; Sltm; Stau2; Cnot3; Trappc12; Casc3; Sf3a1; S…
M3	290	Uniprot: Nucleus speckle	86	74	30	7.07298	1.52808e-18	7.4876e-17	7.4876e-17	Alyref; Sap18; Srp54a; Crnkl1; Rbm15; Patl1; Smu1; Rbm27; Cdc5l; Rbm15b; Thoc7; Atxn2l; Zc3h14; Pabpn1; Casc3; Sf3a1; Dhx36; Sfpq; Eif4a3; Prpf6; Plrg1; Prpf8; Rbm8a; Chtop; U2af1; Rsrc1; Cdc40; Eif4enif1; Son; Ylpm1
M3	290	Uniprot: Nucleus, nucleolus	113	97	20	3.62315	3.95142e-07	1.9362e-05	1.9362e-05	Dhx9; Fmr1; Exosc10; Nol9; Tex10; Ddx17; Ddx5; Nop53; Rsl1d1; Rbm14; Utp15; Stau2; Nol6; Ilf2; Chtop; Mrto4; Pelp1; Senp3; Rpf2; Ilf3
M3	290	Uniprot: Nucleus, nucleoplasm	83	73	22	5.3725	3.65966e-11	1.79323e-09	1.79323e-09	Las1l; Dhx9; Hnrnpa2b1; Fmr1; Hnrnpk; Surf6; Rbm15; Tex10; Rbm15b; Syncrip; Nop53; Gemin5; Aqr; Hnrnpl; Thoc1; Prpf6; Prpf19; Chtop; Pelp1; Senp3; Riox1; Ik
M4	278	CORUM: GABA-A receptor (GABRA1, GABRB2, GABRD)	3	3	3	21.1079	0.000105241	0.00515681	0.00515681	Gabrd; Gabra1; Gabrb2
M4	278	CORUM: GABA-A receptor (Gabra4, Gabrb3, Gabrd)	3	3	3	21.1079	0.000105241	0.00515681	0.00515681	Gabrd; Gabrb3; Gabra4
M4	278	CORUM: GNAI1-GNB2-GNG12 complex	3	3	3	21.1079	0.000105241	0.00515681	0.00515681	Gnai1; Gnb2; Gng12
M4	278	CORUM: GNAS-L-GNB1-GNG12 complex	3	3	3	21.1079	0.000105241	0.00515681	0.00515681	Gnb1; Gnas; Gng12
M4	278	CORUM: GNAS-L-GNB2-GNG12 complex	3	3	3	21.1079	0.000105241	0.00515681	0.00515681	Gnb2; Gnas; Gng12
M4	278	CORUM: GPR56-CD81-Galpha(q/11)-Gbeta complex	5	5	4	16.8863	2.37506e-05	0.00116378	0.00116378	Gna11; Gnaq; Cd81; Gnb1
M4	278	CORUM: SWELL1-containing complex	5	4	3	12.6669	0.000979287	0.0479851	0.0479851	Lrrc8d; Lrrc8b; Lrrc8a
M4	278	LopitDC: PM	302	209	79	5.60912	2.84242e-40	1.39279e-38	1.39279e-38	Arf6; Stx4a; Atp1b1; Slc2a1; Nrp1; Ptprg; Cnnm2; Stxbp3; Ptprj; Slc39a10; Ptk7; Adcy3; Fbxl20; Celsr2; Fam171a2; Gnai1; Robo1; Snap25; Rras2; Alcam; Erbin; Slc4a7; Frs2; Palm; 4932438A13Rik; Plxnb2; Atp2b1; Cacna2d1; Capn5; Gnaz; Itm2b; Gnai2; Rras; Ncam1; Insr; Cnp; Ptpra; Bsg; Gnao1; Gna11; Emb; Nectin2; Rab23; Itgav; Stx1b; Rap1a; Gnb1; Gnb2; Gnas; Rala; Plxna1; Rhog; Cxadr; Yes1; Gprin1; Scn2…
M4	278	Takamori et al., 2006: Cell surface	15	12	5	7.03957	0.00046589	0.0205794	0.0228286	Ncam2; Cntnap1; Thy1; Ncam1; Bsg
M4	278	Takamori et al., 2006: Signalling molecules	33	26	9	5.76357	1.47793e-05	0.000724183	0.000724183	Pld3; Gnaz; Gnai2; Itpr1; Cnp; Gnao1; Gnaq; Gnb1; Gnb2
M4	278	Takamori et al., 2006: Small GTPases and related proteins	34	33	9	5.58834	1.94335e-05	0.000476121	0.000952243	Rap2b; Mras; Rab8b; Rhob; Rac1; Rala; Rab35; Rap1b; Rab5a
M4	278	Takamori et al., 2006: All	290	251	35	2.56444	1.71996e-07	4.21391e-06	8.42782e-06	Atp1b1; Gpm6a; Snap25; Rap2b; Atp2b1; Mras; Sypl; Ncam2; Pld3; Cntnap1; Gnaz; Thy1; Gnai2; Itpr1; Ncam1; Cnp; Bsg; Gnao1; Gnaq; Rab8b; Stx1b; Rhob; Gnb1; Gnb2; Rac1; Rala; Rab35; Atp1a3; Faim2; Atp1a1; Sirt2; Rap1b; Rab5a; Atp2b2; Dpp6
M4	278	Uezu et al., 2016: Arhgef9	74	65	15	4.28519	1.33384e-06	3.2679e-05	6.53579e-05	Atp1b1; Gabrb1; Alcam; Pld3; Thy1; Gnai2; Bsg; Gnaq; Gabra3; Gabra1; Gabrb3; Gabrb2; Nptn; Atp1b3; Rab5a
M4	278	Uniprot: Basolateral cell membrane	30	26	10	7.04077	6.23227e-07	3.05381e-05	3.05381e-05	Erbin; Atp2b1; Bsg; Cd81; Slc12a2; Adcy8; Cxadr; Slc4a10; Myo1d; Slc12a6
M4	278	Uniprot: Cell membrane	670	580	110	3.49054	2.4588e-35	1.20481e-33	1.20481e-33	Arf6; Pacsin3; Neu1; Cacna1h; Hcn1; Slc2a1; Gabrb1; Nrp1; Gfra1; Cnnm2; Stxbp3; Kcnc3; Cbarp; Flrt1; Abcg2; Lrrc8d; Adcy3; Tnfrsf21; Plscr1; Clcn2; Gnai1; Prrt1; Robo1; Gpm6a; Oprm1; Snap25; Rras2; Slc8a1; Alcam; Rtn4r; Slco1c1; Plxnb2; Atp2b1; Folh1; Bmpr2; Hcn2; Prnp; Insr; Ntrk2; Ptpra; Gnao1; Gnaq; Emb; Gria1; Nectin2; Rab23; Cd81; Cd82; Adcy9; Stom; Lpar1; Kcnab2; Rhob; Gabra1; Rac1; Gabrb3;…
M4	278	Uniprot: Cell projection, axon	107	91	17	3.36274	8.81595e-06	0.000431982	0.000431982	Kcnc3; Robo1; Gpm6a; Oprm1; Alcam; Rtn4r; Ntrk2; Kcnab2; Adcy8; Scn1b; Epha4; Slc4a10; Epha5; Kcna4; Cntnap2; Adam22; Tenm3
M4	278	Uniprot: Cell projection, dendrite	121	108	20	3.49664	7.35333e-07	3.60313e-05	3.60313e-05	Nsg2; Kcnc3; Oprm1; Alcam; Rtn4r; Ntrk2; Gria1; Rac1; Adcy8; Cacna1c; Epha4; Slc4a10; Myo1d; Epha5; Nsg1; Amigo1; Slc12a5; Rhoa; Kcnd3; Kcnd2
M4	278	Uniprot: Lipid-anchor	149	139	30	4.26215	3.93171e-10	1.92654e-08	1.92654e-08	Arf6; Plscr1; Gnai1; Snap25; Rap2b; Rras2; Frs2; Gnai2; Cnp; Gnao1; Gnaq; Lyn; Stom; Rhob; Rac1; Gnas; Rala; Aldh3b1; Efr3a; Rgs7bp; Rab5a; Rp2; Smpd3; Rhoa; Dnajb2
M4	278	Uniprot: Lysosome lumen	9	8	4	9.38289	0.000513882	0.0251802	0.0251802	Neu1; Nsg2; Pld3; Nsg1
M4	278	Uniprot: Membrane, caveola	17	14	5	6.21138	0.000887789	0.0217508	0.0435017	Asah2; Adcy8; Spred1; Pacsin2; Kcnd2
M4	278	Uniprot: Multi-pass membrane protein	288	230	32	2.43961	2.67815e-05	0.000437431	0.00131229	Clcn7; Cacna1h; Hcn1; Gabrb1; Cnnm2; Lrrc8d; Sppl2a; Prrt1; Npc1; Gpm6a; Oprm1; Slco1c1; Sypl; Hcn2; Gria1; Lpar1; Adcy5; Cnnm1; Lrrc8b; Fzd7; Slc38a2; Slc4a8; Slc12a5; Slc12a6; Xpr1
M4	278	Uniprot: Single-pass type I membrane protein	128	108	19	3.56782	1.44443e-05	0.000353885	0.000707771	Tnfrsf21; Ntrk2; Bsg; Emb; Plxna2; Nptn; Scn1b; Epha4; Epha7; Npr2; Amigo1; Slitrk1; Pcdhga4; Jam3; Atrn
M4	278	Uniprot: Single-pass type II membrane protein	72	60	21	4.31434	7.5997e-05	0.00297742	0.00372386	Nsg2; Myorg; Itm2c; Asah2; Plscr1; Pld3; Folh1; Itm2b; Nsg1; Plscr3
M5	268	CORUM: 12S U11 snRNP	14	9	6	9.39179	1.8818e-05	0.000922083	0.000922083	Snrpb; Snrpf; Snrpd2; Snrpd3; Srsf7; Toe1
M5	268	CORUM: 17S U2 snRNP	30	26	14	10.2249	9.18888e-12	4.50255e-10	4.50255e-10	Snrpb; Snrpa1; Snrpf; Snrpd2; Snrpd3; Phf5a; Puf60; Dnajc8; Srsf1; Smndc1; Sf3b3; Sf3a3; Sf3b6; Sf3b1
M5	268	CORUM: 18S U11/U12 snRNP	23	13	8	7.62881	4.53959e-06	0.00022244	0.00022244	Snrpb; Snrpf; Snrpd2; Snrpd3; Sf3b3; Zcrb1; Sf3b6; Sf3b1
M5	268	CORUM: CDC5L complex	28	22	8	6.26226	2.36882e-05	0.00116072	0.00116072	Snrpa1; Snrpd2; Snrpd3; Prkdc; Srsf1; Bzw1; Gcn1; Sf3b1
M5	268	CORUM: DNA-PK-Ku-eIF2-NF90-NF45 complex	8	7	4	10.9496	0.000257328	0.0126091	0.0126091	Prkdc; Eif2s1; Eif2s2; Eif2s3x
M5	268	CORUM: EIF3 complex (EIF3A, EIF3B, EIF3G, EIF3I, EIF3C)	5	5	5	21.8955	1.9172e-07	9.39428e-06	9.39428e-06	Eif3a; Eif3b; Eif3i; Eif3g; Eif3c
M5	268	CORUM: EIF3 complex (EIF3A, EIF3B, EIF3G, EIF3I, EIF3J)	5	4	4	17.5194	2.05118e-05	0.00100508	0.00100508	Eif3a; Eif3b; Eif3i; Eif3g
M5	268	CORUM: EIF3 complex (EIF3B, EIF3G, EIF3I)	3	3	3	21.8955	9.42496e-05	0.00461823	0.00461823	Eif3b; Eif3i; Eif3g
M5	268	CORUM: eIF3 complex (EIF3S6, EIF3S5, EIF3S4, EIF3S3, EIF3S6IP, EIF3S2, EIF3S9, EIF3S12, EIF3S10, EIF3S8, EIF3S1, EIF3S7, PCID1)	13	12	11	18.5301	1.06042e-13	5.19608e-12	5.19608e-12	Eif3d; Eif3a; Eif3e; Eif3b; Eif3l; Eif3h; Eif3k; Eif3f; Eif3i; Eif3g; Eif3c
M5	268	CORUM: EIF3 core complex (EIF3A, EIF3B, EIF3G, EIF3I)	4	4	4	21.8955	4.25851e-06	0.000208667	0.000208667	Eif3a; Eif3b; Eif3i; Eif3g
M5	268	CORUM: Large Drosha complex	18	16	6	7.301	9.99042e-05	0.00244765	0.0048953	Srpk1; Ddx3x; Hnrnpul1; Ddx1; Hnrnph1; Hnrnpu
M5	268	CORUM: Nop56p-associated pre-rRNA complex	96	81	44	10.0611	1.66181e-34	8.14287e-33	8.14287e-33	Tcof1; Rpl21; Rpl35a; Srpk1; Eef1a1; Rpl7a; Rpl27a; Rpl7; Rplp0; Rpl13a; Rpl3; Fbl; Rpl12; Rpl18; Rpl28; Rpl6; Rpl5; Rpl13; Rpl9; Rpl10a; Rpl26; Rpl37a; Rps7; Rpl18a; Rpl23; Rpl30; Rpl31; Rpl8; Rps12; Rpl22; Rpl19; Npm1; Nop58; Rpl10; Rpl24; Rpl17; Rpl14; Rpl11; Rpl15; Snu13; Nop56; Rpl4; Rpl27; Hnrnpu
M5	268	CORUM: Parvulin-associated pre-rRNP complex	59	51	23	8.54718	1.87437e-16	9.18442e-15	9.18442e-15	Rpl21; Rpl7a; Rpl7; Rplp0; Rpl13a; Rpl3; Fbl; Rpl18; Rpl6; Rpl13; Rpl10a; Rpl26; Rpl18a; Rpl8; Rpl19; Nop58; Rpl10; Rpl14; Rpl15; Nop56; Rpl4; Pes1; Eef1g
M5	268	CORUM: Ribosome, cytoplasmic	72	66	38	11.5678	8.39589e-33	4.11398e-31	4.11398e-31	Rpl21; Rpl35a; Rpl7a; Rpl27a; Rpl7; Rplp0; Rpl13a; Rpl3; Rpl12; Rpl18; Rpl28; Rpl6; Rpl5; Rpl13; Rpl9; Rpl10a; Rpl26; Rpl37a; Rps7; Rpl18a; Rpl23; Rps25; Fau; Rpl30; Rpl31; Rpl8; Rps12; Rpl22; Rpl19; Rpl10; Rpl24; Rpl17; Rpl14; Rpl11; Rpl15; Rpl37; Rpl4; Rpl27
M5	268	CORUM: SF3b complex	8	6	4	10.9515	0.00025716	0.0126008	0.0126008	Phf5a; Sf3b3; Sf3b6; Sf3b1
M5	268	CORUM: Spliceosome	128	108	39	6.69403	1.0126e-22	2.48088e-21	4.96176e-21	Lsm2; Snrpb; Snrpa1; Cirbp; Snrpf; Snrpd2; Snrpd3; Tra2b; Srsf3; Puf60; Luc7l3; Ddx3x; Snrnp70; Dnajc8; Srsf1; Smndc1; Srsf7; Prpf31; Rbm39; Ddx41; Sf3b3; Prpf3; Srrt; Ncbp2; Mtrex; Srsf9; Snu13; Sf3a3; Trir; Ppil2; Zfp207; Lsm4; Prpf40a; Sf3b6; Lsm6; Usp39; Cpsf6; Sf3b1; Nudt21
M5	268	CORUM: TNF-alpha/NF-kappa B signaling complex 6	14	13	5	7.82116	0.000272568	0.0133558	0.0133558	Fbl; Rpl6; Rpl30; Rpl8; Rpl4
M5	268	CORUM: TRBP containing complex (DICER, RPL7A, EIF6, MOV10 and subunits of the 60S ribosomal particle)	24	18	16	14.6119	1.2043e-16	5.90109e-15	5.90109e-15	Rpl21; Rpl35a; Rpl7a; Rpl7; Rpl12; Rpl28; Rpl13; Rpl10a; Rpl37a; Rpl18a; Rpl30; Rpl19; Rpl14; Rpl11; Rpl15; Rpl27
M5	268	LopitDC: NUCLEUS/CHROMATIN	1210	574	120	2.40681	7.09458e-24	1.73817e-22	3.47634e-22	Ppig; Otud4; Ythdc1; Tcof1; Rngtt; Eif3d; Eef1b2; Map7; Rbm3; Eef1a1; Eif4a2; Eif3a; Snrpb; Apex1; Fbl; Snrpa1; Eif3e; Eif4a1; Snrpf; Snrpd2; Snrpd3; Tra2b; Nfic; Phf5a; Prkdc; Eif5b; Hp1bp3; Alkbh5; Rnf40; Puf60; Thrap3; Luc7l3; Ddx19a; Snrnp70; Aktip; Rbm12b2; Nop58; Dnajc8; Srsf1; Gnl3l; Dclk2; Eif2s1; Prpf38b; Fam98b; Nrde2; Pcid2; Smndc1; Csnk1a1; Srsf7; Trmt2a; Anapc2; Srek1; Camsap2; Dido1…
M5	268	LopitDC: RIBOSOME	123	98	48	8.581	1.19201e-33	5.84087e-32	5.84087e-32	Rpl21; Rpl35a; Rpl7a; Rpl27a; Rpl7; Rplp0; Rpl13a; Rpl3; Drg1; Rpl12; Rpl18; Rpl28; Rpl6; Rpl5; Rpl13; Rpl9; Usp10; Rpl10a; Rpl26; Rpl37a; Rps7; Rpl18a; Rpl23; Rps25; Rpl30; Rpl31; Rpl8; Rps12; Rpl22; Rack1; Rpl19; Fam98a; Fkbp3; Larp4b; Rpl10; Rpl24; Naa25; Farsa; Rpl17; Rpl14; Rpl11; Rpl15; Rpl37; Rpl4; Farsb; Gcn1; Rpl27; Prkra
M5	268	Takamori et al., 2006: RNA Processing/Translation	13	11	5	8.42423	0.000181823	0.00890935	0.00890935	Eef1a1; Rpl3; Rpl13; Uba52; Farsa
M5	268	Uniprot: Chromosome, centromere, kinetochore	17	14	5	6.44315	0.000751224	0.018405	0.03681	Csnk1a1; Seh1l; Phf6; Zfp207; Hnrnpu
M5	268	Uniprot: Nucleus speckle	86	74	21	5.35751	1.25218e-10	3.06784e-09	6.13567e-09	Ppig; Ythdc1; Srpk1; Phf5a; Srsf3; Alkbh5; Thrap3; Snrnp70; Srsf1; Nrde2; Csnk1a1; Prpf31; Bclaf1; Nxf1; Mtrex; Toe1; Habp4; Srsf10; Dyrk1a; Cpsf6; Hnrnpu
M5	268	Uniprot: Nucleus, nucleolus	113	97	15	2.94043	0.000148734	0.00182199	0.00728798	Tcof1; Eef1a1; Fbl; Rpl5; Pa2g4; Prkdc; Npm1; Gnl3l; Nrde2; Rpl11; Snu13; Toe1; Xrn2; Pak1ip1; Habp4
M5	268	Uniprot: Nucleus, nucleoplasm	83	73	12	3.17101	0.00033678	0.0082511	0.0165022	Srpk1; Fbl; Cirbp; Thrap3; Ddx19a; Npm1; Snrnp70; Nrde2; Bclaf1; Recql5; Nxf1; Cpsf6
M6	267	CORUM: (ER)-localized multiprotein complex, Ig heavy chains associated	10	9	8	17.585	6.88788e-10	3.37506e-08	3.37506e-08	Pdia4; P4hb; Hspa5; Ppib; Uggt1; Sdf2l1; Hyou1; Dnajb11
M6	267	CORUM: AUP1-OS9-SEL1L-UBC6e-UBXD8 complex	5	5	3	13.1865	0.00087015	0.0426374	0.0426374	Os9; Ube2j1; Sel1l
M6	267	CORUM: GAA1-GPI8-PIGT-PIG-PIGS complex	5	5	3	13.1865	0.00087015	0.0426374	0.0426374	Pigs; Pigt; Gpaa1
M6	267	CORUM: HRD1 complex	13	12	7	11.8361	5.06117e-07	2.47998e-05	2.47998e-05	Hspa5; Erlin2; Derl2; Os9; Syvn1; Ube2j1; Sel1l
M6	267	CORUM: Oligosaccharyltransferase complex (Stt3A variant)	6	6	4	14.6517	5.84928e-05	0.00286615	0.00286615	Ddost; Stt3a; Rpn1; Rpn2
M6	267	CORUM: Oligosaccharyltransferase complex (Stt3B variant)	7	7	5	15.6982	3.66236e-06	0.000179455	0.000179455	Ddost; Stt3b; Tusc3; Rpn1; Rpn2
M6	267	CORUM: SELK multiprotein complex	10	9	7	15.3869	3.98457e-08	1.95244e-06	1.95244e-06	Ddost; Canx; Stt3a; Derl2; Rpn1; Derl1; Rpn2
M6	267	CORUM: VCP-VIMP-DERL1-DERL2-HRD1-SEL1L complex	6	5	4	14.6542	5.84537e-05	0.00286423	0.00286423	Derl2; Derl1; Syvn1; Sel1l
M6	267	LopitDC: ER	248	195	95	8.49485	3.6291e-68	1.77826e-66	1.77826e-66	Pdia4; Edem3; Ssr4; Mtdh; Ckap4; Colgalt1; Chid1; Ptdss1; Ssr1; Sil1; Plod3; Entpd5; Minpp1; Dpy19l1; Prkcsh; Ddost; Pgrmc1; Dpm1; Emc8; Dhcr7; Comt; P4hb; Serpinh1; Ppib; Pdia3; Canx; Stt3a; Slc39a7; Stt3b; Pomk; Tmem109; Odr4; Jagn1; Soat1; Scap; Uggt1; Pigs; Marchf6; Mlec; Mogs; Zmpste24; Erlin2; Mia3; Tusc3; Pomgnt2; Pigt; Poglut1; Ccdc134; Ufl1; Hacd3; Tmx1; Clptm1; Dhcr24; Sec63; Txndc5; Cd…
M6	267	Uniprot: Endoplasmic reticulum	110	99	19	3.80323	3.75587e-07	1.84038e-05	1.84038e-05	Prdx4; Tmtc1; Entpd5; P4hb; Pdia3; Canx; Stt3a; Ddrgk1; Ccdc134; Selenom; Rpn1; Dnajc3; Mydgf; Cnpy3; Mesd; Ugt8a; Ganab; Pofut1; Rpn2
M6	267	Uniprot: Endoplasmic reticulum lumen	27	25	21	17.0995	6.99411e-24	3.42711e-22	3.42711e-22	Pdia4; Edem3; Sumf1; Manf; Sil1; Plod3; Minpp1; P4hb; Calr; Hspa5; Ppib; Uggt1; Txndc16; Poglut1; Txndc5; Pdia6; Txndc12; Dnajc10; Hyou1; Dnajb11; Erp44
M6	267	Uniprot: Endoplasmic reticulum membrane	301	268	61	4.47897	6.16925e-25	1.51147e-23	3.02293e-23	Ktn1; Ptdss1; Sar1b; Clstn2; Plod3; Elapor1; Calu; Zw10; Ddost; Pgrmc1; Dhcr7; Cers1; Canx; Stt3a; Selenot; Mest; Dnajb14; Stt3b; Tmem109; Jagn1; Soat1; Scap; Smpd4; Marchf6; Ddrgk1; Mia3; Derl2; Ric3; Pomgnt2; Cers6; Ufl1; Hacd3; Dolk; Dhcr24; Cdkal1; Rnf185; Tmco1; Derl1; Clstn3; Clcc1; Abhd12; Cisd2; Tmem147; Tecr; Ccdc47; Cers4; Syvn1; Porcn; Ube2j1; Vapb; Dnajb12; Amfr; Preb; Vapa; Dgat1; Bs…
M6	267	Uniprot: Melanosome	43	39	9	4.60308	0.00010483	0.00513668	0.00513668	Pdia4; Calu; P4hb; Ppib; Pdia3; Canx; Rpn1; Pdia6; Ganab
M6	267	Uniprot: Multi-pass membrane protein	288	230	33	2.54012	1.33526e-05	0.000327139	0.000654278	Slc22a6; Ptdss1; Ugcg; Stt3a; Mest; Stt3b; Tmem38a; Tmem109; Hgsnat; Soat1; Marchf6; Derl2; Yipf6; Cers6; Sidt2; Hacd3; Dolk; Rnf185; Tmco1; Mcoln1; Derl1; Syvn1; Porcn; Dgat1; Itpr2
M6	267	Uniprot: Sarcoplasmic reticulum lumen	5	4	3	13.1888	0.000869716	0.0426161	0.0426161	Manf; Calu; Calr
M7	209	CORUM: SNARE complex (Bet1, Gosr1, Gosr2, Scfd1, Stx5, Sec22b)	6	6	3	14.0383	0.000822695	0.0403121	0.0403121	Sec22b; Gosr2; Stx5a
M7	209	CORUM: SNARE complex (Stx4, Stx6, Stx7, Vamp3, Vamp7, Vamp8, Vti1b)	7	5	4	16.0492	5.02461e-05	0.00246206	0.00246206	Stx7; Vti1b; Vamp7; Stx6
M7	209	CORUM: SNARE complex (Stx5, Gosr2, Sec22b, Bet1)	4	4	3	21.0574	0.000173539	0.00850343	0.00850343	Sec22b; Gosr2; Stx5a
M7	209	CORUM: SNARE complex (VAMP4, STX6, STX16, VTI1a, VTI1b)	5	5	4	22.4612	7.60645e-06	0.000372716	0.000372716	Vti1b; Vti1a; Stx16; Stx6
M7	209	CORUM: SNARE complex (Vamp4, Stx6, Stx16, Vti1a)	4	4	3	21.0574	0.000173539	0.00850343	0.00850343	Vti1a; Stx16; Stx6
M7	209	CORUM: SNARE complex (Vamp7, Stx5, Bet1, Vti1a)	4	4	3	21.0574	0.000173539	0.00850343	0.00850343	Vti1a; Vamp7; Stx5a
M7	209	CORUM: SNARE complex (Vti1b, Stx6, Stx7)	3	3	3	28.0766	4.45586e-05	0.00218337	0.00218337	Stx7; Vti1b; Stx6
M7	209	LopitDC: ER	248	195	41	4.68361	1.72106e-17	4.21659e-16	8.43317e-16	Atp2a2; Hmox2; Ptpn1; Stim1; Pam; Faf2; Lpcat1; Pnpla6; Lclat1; Ermp1; Dhrs13; Bnip1; Vkorc1l1; Tmx3; Emc1; Cyp51; Sgpl1; Mboat2; Cdipt; Ggt7; Ufsp2; Vmp1; Tmem33; Dhrs7; Acsl3; Hacd2; Alg5; Sec11a; Nsdhl; Abhd16a; Hsd17b12; Aldh3a2; Srprb; Pbxip1; Slc27a1; Ano10; Cers2; Magt1; Icmt; Tmub1; Fads2
M7	209	Takamori et al., 2006: Small GTPases and related proteins	34	33	7	5.78145	0.000155608	0.00254159	0.00762477	Rab11b; Rab7; Rab2a; Rab2b; Rab14; Rab4b; Arl8b
M7	209	Takamori et al., 2006: Trafficking proteins (SNAREs)	14	13	6	12.0349	4.48978e-06	0.000219999	0.000219999	Sec22b; Stx7; Vti1a; Vamp7; Stx12; Stx6
M7	209	Uniprot: Cytoplasmic vesicle, COPI-coated vesicle membrane	5	4	3	16.8488	0.000422227	0.0206891	0.0206891	Tmed3; Kdelr1; Tmed2
M7	209	Uniprot: Early endosome membrane	62	56	9	4.0798	0.00030282	0.0148382	0.0148382	Bok; Sorl1; Vti1b; Clcn3; Clcn4; Itch; Rab14; Stx12; Snx5
M7	209	Uniprot: Endoplasmic reticulum	110	99	13	3.32436	0.000125627	0.00307786	0.00615571	Bok; Faf2; Pgrmc2; Cpt1c; Mboat2; Ghdc; Ufsp2; Vmp1; Gdpd1; Hsd17b11; Cln8; Chp1; Magt1
M7	209	Uniprot: Endoplasmic reticulum membrane	301	268	55	5.15912	9.91861e-26	4.86012e-24	4.86012e-24	Sec22b; Faah; Degs1; Gosr2; Bok; Pitpnm1; Atp2a2; Sorl1; Stim1; Lpcat1; Pnpla6; Srebf2; Lmf1; Xxylt1; Lbr; Lclat1; Ermp1; Clcn4; Abcg1; Sort1; Bnip1; Vkorc1l1; Tmed3; Gramd4; Cyp51; Sgpl1; Tmed4; Pafah2; Cdipt; Kdelr1; Cds2; Ergic3; Tmem33; Mospd2; Tmed10; Hhatl; Tmem50b; Hacd2; Agpat3; Osbpl5; Dolpp1; Cln8; Tmed2; Nsdhl; Pign; Pnpla7; Hsd17b12; Aldh3a2; Aup1; Gramd1b; Mospd1; Acsl6; Cers2; Icmt;…
M7	209	Uniprot: Endoplasmic reticulum-Golgi intermediate compartment membrane	20	18	9	12.6388	9.26223e-09	4.53849e-07	4.53849e-07	Sec22b; Tmed3; Stx5a; Kdelr1; Vmp1; Ergic3; Tmed10; Cln8; Tmed2
M7	209	Uniprot: Golgi apparatus membrane	123	104	15	3.46262	2.31778e-05	0.00113571	0.00113571	Faah; Gosr2; Sorl1; Rab6a; Lpcat1; Srebf2; Abcg1; Nmnat2; Stx5a; Rab14; Kdelr1; Tmed10; Tmem50b; Chpt1; Mospd1
M7	209	Uniprot: Golgi apparatus, cis-Golgi network membrane	14	12	9	18.0554	1.33091e-10	6.52146e-09	6.52146e-09	Sec22b; Gosr2; Bok; Tmed3; Rhbdd2; Ergic3; Tmed10; Tmed2; Yipf5
M7	209	Uniprot: Golgi apparatus, Golgi stack membrane	12	11	4	9.36045	0.000617561	0.0302605	0.0302605	Pitpnm1; Sort1; Tmed3; Tmed2
M7	209	Uniprot: Golgi apparatus, trans-Golgi network membrane	42	40	9	6.01846	1.24141e-05	0.000608291	0.000608291	Sec22b; Bok; Sorl1; Pi4k2a; Atp7a; Slc9a7; Rab14; Tmed10; Slc30a7
M7	209	Uniprot: Late endosome membrane	41	39	10	6.31938	8.09976e-06	0.000396888	0.000396888	Vti1b; Rab7; Clcn3; Clcn4; Abca5; Abhd6; Arl8a; Pip4p2; Arl8b
M7	209	Uniprot: Lipid droplet	29	25	8	7.75054	5.07303e-06	0.000248578	0.000248578	Pitpnm1; Rab7; Faf2; Lpcat1; Hsd17b11; Nsdhl; Pnpla7; Aup1
M7	209	Uniprot: Lysosome membrane	85	77	10	3.30763	0.000793775	0.0319813	0.038895	Vti1b; Rab7; Clcn3; Clcn4; Sort1; Abca5; Abhd6; Arl8a; Pip4p2; Arl8b
M7	209	Uniprot: Multi-pass membrane protein	288	230	34	3.11523	5.44355e-07	2.66734e-05	2.66734e-05	Degs1; Clcn6; Lmf1; Slc2a13; Tapt1; Abcg1; Lemd2; Vkorc1l1; Slc9a7; Abca5; Rhbdd2; Kdelr1; Ergic3; Hhatl; Hacd2; Slc30a7; Dolpp1; Pign; Hsd17b12; Chpt1; Tlcd1; Magt1; Icmt; Yipf5
M7	209	Uniprot: Recycling endosome membrane	38	36	8	6.07268	3.57711e-05	0.00175279	0.00175279	Bok; Sorl1; Vti1b; Rab11b; Clcn3; Clcn4; Slc9a7; Stx12
M7	209	Uniprot: Single-pass type IV membrane protein	14	13	6	9.36045	0.000617561	0.0302605	0.0302605	Sec22b; Vti1b; Mospd2; Stx12
M8	193	CORUM: 20S proteasome	14	14	14	30.4041	1.08633e-21	5.32301e-20	5.32301e-20	Psmb1; Psmb5; Psma3; Psma2; Psmb7; Psmb4; Psmb6; Psma6; Psma4; Psmb3; Psmb2; Psma1; Psma7; Psma5
M8	193	CORUM: 26S proteasome	22	22	22	30.4041	7.11768e-34	3.48767e-32	3.48767e-32	Psmb1; Psmd4; Psmb5; Psma3; Psmc3; Psmc2; Psma2; Psmc4; Psmc1; Psmc5; Psmc6; Psmb7; Psmb4; Psmb6; Psma6; Psma4; Psmb3; Psmb2; Psma1; Psmd13; Psma7; Psma5
M8	193	CORUM: Anaphase-promoting complex	10	8	4	12.1658	0.000203647	0.00997869	0.00997869	Anapc1; Cdc23; Cdc16; Anapc4
M8	193	CORUM: BBS-chaperonin complex	10	7	6	18.2518	2.19896e-07	1.07749e-05	1.07749e-05	Tcp1; Cct8; Cct2; Cct4; Cct5; Cct3
M8	193	CORUM: CCT complex (chaperonin containing TCP1 complex)	8	8	8	30.4041	1.18788e-12	5.82061e-11	5.82061e-11	Tcp1; Cct8; Cct7; Cct2; Cct4; Cct5; Cct6a; Cct3
M8	193	CORUM: CCT complex (chaperonin containing TCP1 complex), testis specific	8	7	7	26.6082	2.90787e-10	1.42485e-08	1.42485e-08	Tcp1; Cct8; Cct7; Cct2; Cct4; Cct5; Cct3
M8	193	CORUM: CCT-Pdcl complex	9	9	9	30.4041	3.75013e-14	1.83756e-12	1.83756e-12	Tcp1; Cct8; Cct7; Cct2; Cct4; Cct5; Cct6a; Cct3; Pdcl
M8	193	CORUM: CCT-Prefoldin complex	14	10	8	17.3856	2.99144e-09	1.46581e-07	1.46581e-07	Tcp1; Cct8; Cct7; Cct2; Cct4; Cct5; Cct6a; Cct3
M8	193	CORUM: CCT-Prefoldin complex, testis specific	14	9	7	15.215	1.04889e-07	5.13956e-06	5.13956e-06	Tcp1; Cct8; Cct7; Cct2; Cct4; Cct5; Cct3
M8	193	CORUM: CSA complex	11	9	8	22.1196	1.79476e-10	8.79435e-09	8.79435e-09	Cops5; Cops3; Cops4; Cops6; Cul4a; Cops8; Gps1; Cops7a
M8	193	CORUM: CSA-POLIIa complex	12	9	8	20.2798	5.22632e-10	2.56089e-08	2.56089e-08	Cops5; Cops3; Cops4; Cops6; Cul4a; Cops8; Gps1; Cops7a
M8	193	CORUM: CTLH complex	5	5	5	30.4041	3.65929e-08	1.79305e-06	1.79305e-06	Mkln1; Ranbp9; Maea; Rmnd5a; Armc8
M8	193	CORUM: DDB2 complex	11	9	8	22.1196	1.79476e-10	8.79435e-09	8.79435e-09	Cops5; Cops3; Cops4; Cops6; Cul4a; Cops8; Gps1; Cops7a
M8	193	CORUM: EARP complex	4	4	4	30.4041	1.13535e-06	5.56321e-05	5.56321e-05	Vps51; Vps52; Vps53; Vps50
M8	193	CORUM: EIF2B1-EIF2B2-EIF2B3-EIF2B4-EIF2B5 complex	5	4	4	24.3275	5.52663e-06	0.000270805	0.000270805	Eif2b4; Eif2b5; Eif2b1; Eif2b2
M8	193	CORUM: EIF2B2-EIF2B3-EIF2B4-EIF2B5 complex	4	3	3	22.807	0.00013671	0.0066988	0.0066988	Eif2b4; Eif2b5; Eif2b2
M8	193	CORUM: Elongator holo complex	4	4	4	30.4041	1.13535e-06	5.56321e-05	5.56321e-05	Elp1; Elp2; Elp3; Elp4
M8	193	CORUM: GARP complex	4	3	3	22.807	0.00013671	0.0066988	0.0066988	Vps51; Vps52; Vps53
M8	193	CORUM: Immunoproteasome	14	14	13	28.2324	4.8058e-19	2.35484e-17	2.35484e-17	Psmb1; Psmb9; Psma3; Psmb8; Psma2; Psmb4; Psma6; Psma4; Psmb3; Psmb2; Psma1; Psma7; Psma5
M8	193	CORUM: PA28-20S proteasome	16	16	16	30.4041	1.01019e-24	4.94993e-23	4.94993e-23	Psmb1; Psmb5; Psma3; Psma2; Psmb7; Psme1; Psme2; Psmb4; Psmb6; Psma6; Psma4; Psmb3; Psmb2; Psma1; Psma7; Psma5
M8	193	CORUM: PA28gamma-20S proteasome	15	15	14	28.3772	1.58299e-20	7.75665e-19	7.75665e-19	Psmb1; Psmb5; Psma3; Psma2; Psmb7; Psmb4; Psmb6; Psma6; Psma4; Psmb3; Psmb2; Psma1; Psma7; Psma5
M8	193	CORUM: PA700 complex	20	20	17	25.8435	3.19466e-23	1.56538e-21	1.56538e-21	Psmd4; Psmd14; Psmc3; Psmd3; Psmd7; Psmc2; Psmc4; Psmc1; Psmc5; Psmc6; Psmd1; Psmd11; Psmd2; Psmd6; Psmd8; Psmd12; Psmd13
M8	193	CORUM: PA700-20S-PA28 complex	36	36	33	27.8705	4.5693e-47	2.23896e-45	2.23896e-45	Psmb1; Psmd4; Psmd14; Psmb5; Psma3; Psmc3; Psmd3; Psmd7; Psmc2; Psma2; Psmc4; Psmc1; Psmc5; Psmc6; Psmb7; Psme1; Psme2; Psmb4; Psmd1; Psmb6; Psmd11; Psmd2; Psmd6; Psmd8; Psmd12; Psma6; Psma4; Psmb3; Psmb2; Psma1; Psmd13; Psma7; Psma5
M8	193	CORUM: PFKL-PFKM-PFKP complex	3	3	3	30.4041	3.50464e-05	0.00171727	0.00171727	Pfkl; Pfkm; Pfkp
M8	193	CORUM: Ubiquilin-proteasome complex	6	6	4	20.2694	1.61637e-05	0.000792023	0.000792023	Ube3a; Psma2; Psma6; Psma1
M8	193	CORUM: Ubiquitin E3 ligase (CSN1, CSN8, HRT1, SKP1, SKP2, CUL1, CUL2, CUL3)	8	6	5	19.0091	1.88622e-06	9.24246e-05	9.24246e-05	Cops8; Gps1; Cul2; Cul3; Cul1
M8	193	LopitDC: PROTEASOME	33	31	30	27.6496	1.61468e-42	7.91191e-41	7.91191e-41	Psmb1; Psmd4; Psmd14; Psmb5; Psma3; Psmd3; Psmd7; Psmb8; Psmc2; Psma2; Psmc4; Psmc1; Psmb7; Psmb4; Psmd1; Psmb6; Psmd11; Txnl1; Psmd2; Psmd6; Prps2; Psmd8; Psmd12; Psma6; Psma4; Psmb3; Psmb2; Psma1; Psmd13; Psma7
M8	193	Takamori et al., 2006: Chaperones	8	8	4	15.2021	7.16002e-05	0.00350841	0.00350841	Tcp1; Cct4; Cct6a; Cct3
M8	193	Takamori et al., 2006: Metabolic enzymes	32	28	8	7.60622	6.28993e-06	0.000308206	0.000308206	Pfkl; Glul; Phka1; Fasn; Pfkm; Acly; Pfkp; Dnpep
M8	193	Takamori et al., 2006: Proteasome	9	9	9	30.4041	3.75013e-14	1.83756e-12	1.83756e-12	Psmc3; Psmd3; Psmc2; Psmc4; Psmc1; Psmc5; Psmd2; Psma4; Psma1
M8	193	Takamori et al., 2006: All	290	251	25	2.63847	6.67851e-06	0.000109082	0.000327247	Psmc3; Fth1; Tcp1; Pfkl; Psmd3; Glul; Phka1; Fasn; Psmc2; Pfkm; Psmc4; Psmc1; Psmc5; Rps18; Cct4; Cct6a; Cct3; Zzef1; Phkb; Psmd2; Acly; Psma4; Psma1; Pfkp; Dnpep
M8	193	Uniprot: Cytoplasm, cytoskeleton, microtubule organizing center, centrosome	97	85	11	3.45494	0.000302081	0.00740099	0.014802	Birc6; Tcp1; Cct8; Actr1a; Cct4; Cct5; Ecpas; Klhl22; Dctn2; Txndc9; Cul3
M9	192	CORUM: Dystrobrevin-syntrophin complex, brain-derived	4	4	3	22.9219	0.000134671	0.00659889	0.00659889	Dmd; Snta1; Dtna
M9	192	CORUM: ESCRT-III complex	9	7	4	13.588	0.000122891	0.00602167	0.00602167	Chmp2b; Chmp1a; Chmp3; Chmp2a
M9	192	LopitDC: PEROXISOME	33	25	20	18.548	2.82713e-22	1.38529e-20	1.38529e-20	Phyh; Cat; Scp2; Hsd17b4; Abcd3; Acot8; Gnpat; Acbd5; Acad11; Agps; Acaa1a; Far1; Tmem135; Tysnd1; Ehhadh; Acox3; Pex3; Acox1; Decr2; Pex11b
M9	192	Uniprot: Peroxisome	26	23	10	11.7608	3.73341e-09	1.82937e-07	1.82937e-07	Phyh; Nudt19; Hsd17b4; Acad11; Agps; Tysnd1; Ehhadh; Nudt12; Acox1; Decr2
M9	192	Uniprot: Peroxisome membrane	18	14	7	11.8935	8.40176e-07	4.11686e-05	4.11686e-05	Gnpat; Acbd5; Agps; Far1; Tmem135; Pex3; Pex11b
M10	191	CORUM: AP3 adaptor complex	7	7	4	17.5557	3.52631e-05	0.00172789	0.00172789	Ap3d1; Ap3m2; Ap3s1; Ap3b2
M10	191	CORUM: Arp2/3 protein complex	7	7	4	17.5557	3.52631e-05	0.00172789	0.00172789	Arpc4; Actr2; Actr3; Arpc2
M10	191	CORUM: Axin-Apc-Catnb-Gsk3b-Macf1 complex	5	4	3	18.4366	0.000323342	0.0158437	0.0158437	Macf1; Gsk3b; Apc
M10	191	CORUM: Bcl-2-Beclin1-UVRAG-PI(3)KC3 complex	5	5	3	18.4335	0.000323504	0.0158517	0.0158517	Pik3c3; Uvrag; Pik3r4
M10	191	CORUM: nNos-Capon-Syn1 complex	3	3	3	30.7225	3.39626e-05	0.00166417	0.00166417	Nos1; Nos1ap; Syn1
M10	191	CORUM: SOS1-ABI1-EPS8 complex	3	3	3	30.7225	3.39626e-05	0.00166417	0.00166417	Eps8; Sos1; Abi1
M10	191	CORUM: TSC (TSC1, TSC2, AXIN, GSK3) complex	4	3	3	23.0458	0.000132517	0.00649334	0.00649334	Tsc2; Tsc1; Gsk3b
M10	191	Takamori et al., 2006: Cytoskeleton	23	21	5	6.68108	0.000722069	0.0353814	0.0353814	Actr2; Actr3; Arpc5l; Dync1h1; Arpc1a
M10	191	Takamori et al., 2006: Endocytosis- related proteins	10	10	4	12.289	0.000195854	0.00959686	0.00959686	Ap3m2; Ap2a2; Ap2s1; Ap2m1
M10	191	Uezu et al., 2016: InSyn1	85	73	11	3.98399	8.31463e-05	0.0021086	0.00407417	Actr2; Jcad; Dvl3; Wasf1; Ap2a1; Ap2a2; Arhgap39; Ap2s1; Ap2m1; Apc; Ap2b1
M10	191	Uezu et al., 2016: iPSD	181	157	17	2.89734	6.88189e-05	0.00168606	0.00337213	Actr2; Cyth2; Iqsec3; Jcad; Dvl3; Ap3m2; Wasf1; Magi3; Arpc1a; Ap2a1; Ap2a2; Arhgap39; Ap2s1; Ap2m1; Apc; Ap2b1; Iqsec2
M10	191	Uniprot: Cell junction, adherens junction	42	38	11	8.05186	5.73774e-08	2.81149e-06	2.81149e-06	Cyth3; Abi2; Cyth2; Jcad; Ccdc85a; Frmd4a; Cyth1; Afdn; Sh3bp1; Apc; Camsap3
M10	191	Uniprot: Cell junction, tight junction	32	27	6	5.76538	0.000489035	0.0239627	0.0239627	Cyth3; Cyth2; Frmd4a; Magi3; Cyth1; Sh3bp1
M10	191	Uniprot: Cell projection	32	30	7	6.72284	5.83397e-05	0.00285865	0.00285865	Arpc4; Actr2; Cyth2; Trio; Actr3; Arpc2; Sh3bp1
M10	191	Uniprot: Cell projection, lamellipodium	54	48	8	4.55614	0.000310993	0.0152386	0.0152386	Abi2; Sorbs2; Carmil2; Carmil1; Arhgef6; Coro1c; Apc; Sh3rf1
M10	191	Uniprot: Cytoplasm, cytoskeleton	210	185	21	3.08534	3.41196e-06	8.35931e-05	0.000167186	Camsap1; Arpc4; Actr2; Abi2; Carmil2; Abl2; Mapre1; Carmil1; Cep170b; Atat1; Wasf1; Ivns1abp; Actr3; Arpc2; Macf1; Myo9b; Spast; Arpc1a; Coro1c; Apc; Camsap3
M11	178	CORUM: Casein kinase II (beta-dimer, alpha, alpha')	3	3	3	32.9663	2.74573e-05	0.00134541	0.00134541	Csnk2a2; Csnk2b; Csnk2a1
M11	178	CORUM: FACT complex, UV-activated	5	5	3	19.7798	0.00026243	0.0128591	0.0128591	Csnk2a2; Csnk2b; Csnk2a1
M11	178	CORUM: Ksr1-CK2 complex	4	4	3	24.7247	0.000107371	0.0052612	0.0052612	Csnk2a2; Csnk2b; Csnk2a1
M11	178	CORUM: Ksr1-CK2-MEK-14-3-3 complex, PDGF treated	6	6	4	21.9775	1.17128e-05	0.000573927	0.000573927	Csnk2a2; Map2k1; Csnk2b; Csnk2a1
M11	178	CORUM: PP2A-NR3A complex	4	3	3	24.7289	0.000107317	0.00525853	0.00525853	Ppp2ca; Ppp2r2a; Ppp2r1a
M11	178	LopitDC: CYTOSOL	359	266	25	2.33209	5.43761e-05	0.000888144	0.00266443	Idh1; Ldha; Gpi1; Aprt; Bcat1; Aco1; Pkm; Ube2m; Ctps; Gart; Vat1l; Gmppb; Pgm2l1; Tkfc; Cbs; Ipo9; Asl; Glod4; Gnpda2; Atic; Pgm1; Pgd; Xpo7; Rabggta; Ndrg2
M12	177	CORUM: CADM1-DLG1-MPP3-PIK3R1 complex	4	4	3	24.8644	0.000105576	0.0051732	0.0051732	Mpp3; Dlg1; Cadm1
M12	177	CORUM: Kif3-cadherin-catenin complex	5	5	3	19.8915	0.000258074	0.0126456	0.0126456	Cdh2; Ctnnb1; Ctnnd1
M12	177	CORUM: Septin complex	5	5	5	33.1525	2.3627e-08	1.15772e-06	1.15772e-06	Septin2; Septin7; Septin9; Septin11; Septin8
M12	177	CORUM: Xin-Cdh2-Ctnnb1-Ctnnd1 complex	4	3	3	24.8686	0.000105522	0.00517058	0.00517058	Cdh2; Ctnnb1; Ctnnd1
M12	177	LopitDC: PM	302	209	42	4.68369	5.39391e-18	1.32151e-16	2.64302e-16	Cask; Ctnna1; Mpp6; Septin2; Stxbp1; Slc1a4; Septin7; Src; Slc3a2; L1cam; Cdh2; Sirpa; Arvcf; Ctnnb1; Adgrb1; Pkp4; Septin9; Negr1; Tspan9; Lsamp; Septin11; Aida; Septin10; Septin8; Rell1; Cadm4; Zdhhc5; Ppp1r16a; Cadm3; Ntm; Glipr2; Lrrc57; Slc7a5; Septin3; Septin5; Ildr2; Gna13; Ctnnd1; Plxnd1; Slc8a2; Cadm1; Septin6
M12	177	Takamori et al., 2006: Cell surface	15	12	4	8.8452	0.000839977	0.0205794	0.0411589	Negr1; Nfasc; Lsamp; Ntm
M12	177	Uezu et al., 2016: Arhgef9	74	65	16	7.17911	3.41414e-10	1.67293e-08	1.67293e-08	Slc1a3; Cnrip1; L1cam; Atp1b2; Gabra2; Grin1; Adgrb1; Cd47; Slitrk5; Lsamp; Cadm2; Cadm4; Cadm3; Ntm; Lgi1; Nlgn2
M12	177	Uezu et al., 2016: Gphn	90	83	10	3.68801	0.000338987	0.0166104	0.0166104	Slc1a3; Cnrip1; Ptprs; L1cam; Slitrk5; Plpp3; Ntm; Lgi1; Slc6a1; Nlgn2
M12	177	Uezu et al., 2016: iPSD	181	157	19	3.49433	1.60545e-06	7.86669e-05	7.86669e-05	Slc1a3; Cnrip1; Ptprs; L1cam; Atp1b2; Gabra2; Grin1; Adgrb1; Cd47; Slitrk5; Lsamp; Cadm2; Cadm4; Plpp3; Cadm3; Ntm; Lgi1; Slc6a1; Nlgn2
M12	177	Uezu et al., 2016: ePSD	114	99	18	5.24799	5.58847e-09	1.36918e-07	2.73835e-07	Cacng2; Grin2a; Grin1; Shisa6; Adgrb1; Lrrtm4; Slitrk5; Dlg1; Lrrtm2; Lrrtm1; Lrrc4; Gria3; Nlgn2; Adgrb3; Nlgn3; Lrrtm3; Adgrb2; Ppp1r16b
M12	177	Uniprot: Basolateral cell membrane	30	26	7	7.74087	2.27309e-05	0.000556907	0.00111381	Lin7b; Slc4a4; Dlg1; Plpp3; Kcnj16; Slc8a2; Kcnj10
M12	177	Uniprot: Cell junction	45	38	7	5.16321	0.000344791	0.0168948	0.0168948	Lin7b; Slc3a2; Cdh2; Ctnnb1; Dlg1; Cadm3; Jam2
M12	177	Uniprot: Cell membrane	670	580	53	2.6904	3.71309e-12	9.09708e-11	1.81942e-10	Cask; Lin7b; Gja1; Slc1a2; Slc1a3; Gjc2; Slc38a3; Ednrb; Ntng1; Fmn2; Scn1a; Ptprs; Scn2a; Ttc7b; Flot1; Sema4d; Slc6a6; Stx1a; Syt3; Epb41l2; Adcy1; Src; Slc3a2; L1cam; Cdh2; Gabra2; Grin2a; Grin1; Cacna1a; Ctnnb1; Adgrb1; Ctnna2; Slc6a3; Cd47; Rell1; Ntng2; Zdhhc5; Gpr37l1; Plpp3; Cadm3; Lingo1; Jam2; Slc7a5; Prrt2; Ctnnd1; Plxnd1; Adgrb3; Nlgn3; Adgrb2; Slc8a2; Cadm1; Ppp1r16b; Nectin1
M12	177	Uniprot: Cell projection, cilium, flagellum	12	11	4	11.0527	0.000327457	0.0160454	0.0160454	Septin2; Septin7; Septin4; Septin6
M12	177	Uniprot: Membrane	193	168	15	2.60108	0.000600691	0.0294338	0.0294338	Plcb3; Mpp2; Adcy1; F3; Flot2; Pick1; Dlg1; Tspan9; Rnf141; Lrrc57; Slc22a4; Kcnj16; Gna13; Lrfn4; Kcnj10
M12	177	Uniprot: Multi-pass membrane protein	288	230	24	2.45229	0.000756506	0.00926719	0.0370688	Slc1a2; Gjc2; Slc38a3; Scn1a; Slc6a6; Slc4a4; Adcy1; Grin2a; Slc6a3; Cd47; Tspan9; Plpp3; Slc7a5; Slc22a4; Kcnj16; Kcnj10
M12	177	Uniprot: Single-pass type I membrane protein	128	108	12	4.48296	1.18954e-05	0.000353885	0.000582875	L1cam; F3; Rell1; Cadm3; Nrxn1; Lingo1; Jam2; Ildr2; Lrfn4; Nlgn3; Cadm1; Nectin1
M13	172	CORUM: 40S ribosomal subunit, cytoplasmic	29	29	21	24.7049	6.55577e-27	3.21233e-25	3.21233e-25	Rps16; Rpsa; Rps2; Rps20; Rps8; Rps15a; Rps14; Rps23; Rps11; Rps6; Rps15; Rps24; Rps26; Rps28; Rps3; Rps17; Rps10; Rps5; Rps9; Rps21; Rps19
M13	172	CORUM: BHC complex	6	4	3	17.064	0.000463334	0.0227033	0.0227033	Hdac1; Hdac2; Kdm1a
M13	172	CORUM: BRAF53-BRCA2 complex	7	4	3	14.6287	0.000792994	0.0388567	0.0388567	Hdac1; Hdac2; Kdm1a
M13	172	CORUM: COG complex	8	6	4	17.064	4.54607e-05	0.00222758	0.00222758	Cog7; Cog5; Cog8; Cog1
M13	172	CORUM: COG1-COG8-COG5-COG6-COG7 subcomplex	5	5	4	27.293	3.48533e-06	0.000170781	0.000170781	Cog7; Cog5; Cog8; Cog1
M13	172	CORUM: CoREST-HDAC complex	7	4	3	14.6287	0.000792994	0.0388567	0.0388567	Hdac1; Hdac2; Kdm1a
M13	172	CORUM: MTA1 complex	6	4	3	17.064	0.000463334	0.0227033	0.0227033	Hdac1; Hdac2; Mta1
M13	172	CORUM: MTA1-HDAC core complex	5	4	3	20.4733	0.000236888	0.0116075	0.0116075	Hdac1; Hdac2; Mta1
M13	172	CORUM: Multisynthetase complex	10	10	10	34.1163	3.6136e-16	1.77067e-14	1.77067e-14	Aimp1; Mars1; Lars; Iars; Eprs; Aimp2; Dars; Kars; Rars; Eef1e1
M13	172	CORUM: Nop56p-associated pre-rRNA complex	96	81	15	5.3443	8.81078e-08	2.15864e-06	4.31728e-06	Ncl; Rps16; Srp14; Rps2; Eef2; Rps8; Rps15a; Rps14; Rps23; Rps11; Rps6; Rps15; Rps24; Rps17; Rps9
M13	172	CORUM: NRD complex (Nucleosome remodeling and deacetylation complex)	7	4	4	19.505	2.32464e-05	0.00113907	0.00113907	Hdac1; Hdac2; Kdm1a; Mta1
M13	172	CORUM: Parvulin-associated pre-rRNP complex	59	51	9	5.21127	4.56314e-05	0.00111797	0.00223594	Dhx15; Ncl; Rps8; Rps4x; Rps6; Rps3; Rps3a1; Rps9; Pin4
M13	172	CORUM: Ribosome, cytoplasmic	72	66	22	10.4351	2.42972e-17	5.9528e-16	1.19056e-15	Rps16; Rpsa; Rps2; Rps20; Rps8; Rps15a; Rps14; Rps23; Rps11; Rps4x; Rps6; Rps15; Rps24; Rps26; Rps28; Rps3; Rps17; Rps10; Rps5; Rps9; Rps21; Rps19
M13	172	CORUM: Tetrameric COG subcomplex	4	4	3	25.5872	9.6894e-05	0.0047478	0.0047478	Cog7; Cog5; Cog8
M13	172	CORUM: XFIM complex	5	5	3	20.4698	0.000237007	0.0116133	0.0116133	Hdac1; Hdac2; Kdm1a
M13	172	LopitDC: RIBOSOME	123	98	22	6.1281	4.0733e-12	9.9796e-11	1.99592e-10	Nmt1; Rps16; Rpsa; Rps2; Rps20; Rps8; Rps15a; Rps14; Rps23; Rps11; Rps6; Rps15; Rps24; Rps26; Rps28; Rps3; Rps17; Rps10; Rps5; Rps9; Rps21; Rps19
M13	172	Uniprot: Cytoplasm, cytosol	240	217	20	2.85417	1.88943e-05	0.000925821	0.000925821	Nmt1; Aimp1; Dnajc2; Rps23; Rps26; Rps28; Irs2; Caprin1; Agtpbp1; Mars1; Qars; Iars; Osbpl6; Eprs; Aimp2; Dgkg; Kars; Rps21; Rars; Bag6
M13	172	Uniprot: Rough endoplasmic reticulum	11	11	4	12.4059	0.00020024	0.00981177	0.00981177	Rps23; Rps26; Rps28; Rps21
M14	159	CORUM: BBSome	8	7	4	18.456	3.33645e-05	0.00163486	0.00163486	Bbs9; Bbs5; Bbs7; Bbs2
M14	159	CORUM: BBSome core complex	4	4	3	27.6792	7.65622e-05	0.00375155	0.00375155	Bbs9; Bbs7; Bbs2
M14	159	CORUM: Gamma-tubulin complex	6	6	4	24.6038	7.46615e-06	0.000365841	0.000365841	Tubgcp3; Tubg1; Tubgcp5; Tubgcp2
M14	159	CORUM: GATOR complex	8	6	4	18.4591	3.33423e-05	0.00163377	0.00163377	Depdc5; Wdr59; Wdr24; Mios
M14	159	CORUM: GATOR2 complex	5	5	3	22.1434	0.000187592	0.009192	0.009192	Wdr59; Wdr24; Mios
M14	159	CORUM: SOG complex	8	6	4	18.4591	3.33423e-05	0.00163377	0.00163377	Szt2; Wdr59; Wdr24; Mios
M14	159	CORUM: Sororin-cohesin complex	6	5	3	18.456	0.000367533	0.0180091	0.0180091	Pds5b; Smc1a; Smc3
M14	159	Uezu et al., 2016: InSyn1	85	73	10	4.35072	8.60655e-05	0.0021086	0.00421721	Stox2; Cnksr2; Cc2d1a; Ccdc92; Csnk1d; Mink1; Csnk1e; Trim3; Lzts3; Cdkl5
M14	159	Uniprot: Cytoplasm, cytoskeleton, microtubule organizing center, centrosome	97	85	12	4.57499	9.85367e-06	0.00048283	0.00048283	Dapk3; Cc2d1a; Nek7; Kif2a; Nek1; Tubg1; Cdkl5; Rpgrip1l; Mark4; Tubg2; Tubgcp2; Mzt2
M15	150	CORUM: Kinase maturation complex 1	16	13	6	14.6775	1.6319e-06	7.99633e-05	7.99633e-05	Pfdn2; Ywhag; Ywhae; Ywhaz; Ywhah; Ywhab
M15	150	CORUM: WIP-WASp-actin-myosin-IIa complex	6	4	3	19.5667	0.000309164	0.015149	0.015149	Myl12b; Myl6; Myh9
M15	150	LopitDC: CYTOSOL	359	266	27	2.9888	2.00882e-07	4.92161e-06	9.84323e-06	Ddi2; Prdx6; Crabp2; Stmn1; Mtpn; Jpt1; Rbp1; Clns1a; Hsph1; Pea15a; Srm; Nrd1; Usp47; Hmgcs1; Rnh1; Sh3bgrl3; Nrbp1; Adi1; Pgls; Ppp1r2; Oga; Sh3bgrl; Uchl3; Acss2; Nagk; Galk1; Psmd10
M16	147	CORUM: Coatomer complex	7	7	6	34.2157	1.53195e-09	7.50657e-08	7.50657e-08	Copb2; Cope; Arcn1; Copa; Copb1; Copg1
M16	147	CORUM: Coatomer-Arf1 complex	8	8	6	29.9388	6.00151e-09	2.94074e-07	2.94074e-07	Copb2; Cope; Arcn1; Copa; Copb1; Copg1
M16	147	Uniprot: Chromosome, centromere, kinetochore	17	14	5	11.7467	4.46198e-05	0.00218637	0.00218637	Tpr; Rangap1; Gpatch11; Nup85; Mad1l1
M16	147	Uniprot: Nucleus, nuclear pore complex	21	17	5	9.51085	0.000135206	0.00662508	0.00662508	Tpr; Nup62; Nup98; Nup88; Nup85
M17	147	LopitDC: ER	248	195	25	4.06037	1.27972e-09	2.09021e-08	6.27062e-08	Tap1; Por; Caml; Sptlc2; Alg11; Vezt; Lpcat4; Lnpk; Asphd2; Nat14; Tmem120a; Mboat7; Gpat4; Ubac2; Ubxn4; Stx18; Slc27a4; Rusf1; Lpgat1; Alg1; Vkorc1; Dpm3; Sgpp1; Rdh11; Dpagt1
M17	147	Uniprot: Endoplasmic reticulum membrane	301	268	42	5.60133	3.22561e-21	5.2685e-20	1.58055e-19	Pdzd8; Osbpl8; Mctp1; Slc27a2; Hsd17b7; Sptlc2; Zfyve27; Esyt2; Esyt1; Ei24; Surf4; Gba2; Tmcc1; Cyp4x1; Lpcat4; Atl2; Tex2; Lnpk; Tmcc2; C2cd2l; Atl1; Gpat3; Mboat7; Get1; Rtn1; Gpat4; Ubac2; Arl6ip5; Ubxn4; Slc27a4; Atl3; Lpgat1; Tmem189; Osbpl3; Cyp2s1; Sacm1l; Rtn3; Sgpp1; Arl6ip1; Acsl4; Rdh11; Dpagt1
M18	142	CORUM: hASC-1 complex	4	4	3	30.993	5.45329e-05	0.00267211	0.00267211	Ascc2; Ascc1; Trip4
M19	120	CORUM: Exosome	13	11	4	15.0513	0.000102991	0.00504656	0.00504656	Exosc4; Exosc5; Dis3; Exosc1
M19	120	CORUM: Intraflagellar transport complex A	5	5	4	39.12	8.19072e-07	4.01345e-05	4.01345e-05	Ift140; Wdr19; Wdr35; Ttc21b
M19	120	Uniprot: Nucleus, nucleolus	113	97	12	5.25357	2.35427e-06	5.76797e-05	0.000115359	Emg1; Frg1; Spin1; Top2b; Nudt16; Rpp38; Pno1; Dis3; Dkc1; Zbtb11; Ddx18; Ddx21
M20	110	CORUM: Arp2/3 protein complex	7	7	3	22.8623	0.000212402	0.00520384	0.0104077	Arpc5; Arpc3; Arpc1b
M21	104	Uniprot: Cell membrane	670	580	28	2.41902	5.36616e-06	6.57355e-05	0.000262942	Arhgef25; Kcnh2; Adam10; Hcn3; Lamp1; Lamp2; Bmpr1a; Slc16a1; Rac3; Slc7a1; Kcnc2; Islr2; Adcy2; Kirrel3; Lpcat2; Dcun1d3; Kcnq3; Lrp4; Susd2; Abcb6; Ralb; Serinc3; Slc2a5; Kcna1; Efnb2; Trpc6; Dusp15; Kcnq5
M21	104	Uniprot: Golgi apparatus membrane	123	104	9	4.17513	0.000275716	0.00675505	0.0135101	Fut9; Adam10; Mgat1; Rab6b; Lpcat2; Fkrp; Abcb6; Serinc3; Manea
M22	101	CORUM: Retromer complex (SNX1, SNX2, VPS35, VPS29, VPS26B)	5	5	3	34.8594	4.8279e-05	0.00236567	0.00236567	Vps26b; Vps35; Vps29
M22	101	CORUM: Vps29-Vps35-Vps26a complex	3	3	2	38.7327	0.000870207	0.0426401	0.0426401	Vps35; Vps29
M22	101	Uniprot: Endoplasmic reticulum membrane	301	268	20	3.88211	1.1764e-07	1.15287e-06	5.76434e-06	Fmo1; Clgn; Cds1; Otulinl; Cybc1; Sez6l2; Bcap31; Sez6l; Ilvbl; Tmem41b; Tmcc3; Tapbpl; Ephx1; Tmx2; Srd5a3; Ptdss2; Ptgis; Rnf13; Spcs3; Cyp2u1
M22	101	Uniprot: Microsome membrane	24	17	5	12.6431	3.58048e-05	0.00175444	0.00175444	Fmo1; Tapbpl; Ephx1; Spcs3; Cyp2u1
M22	101	Uniprot: Single-pass type I membrane protein	128	108	10	4.58282	0.000775528	0.012667	0.0380009	Clgn; Sez6l2; Sez6l; Aatk; Tapbpl; Lrp1; Sorcs2
M23	101	LopitDC: PM	302	209	16	3.12688	4.01913e-05	0.000656458	0.00196937	Chmp6; Lrrc4b; Gna12; Gnb4; Kras; Efnb1; Ephb3; Ephb2; Lrig1; Cnnm3; Zdhhc8; Ano6; Rhbdf1; Kirrel; Lrrc8c; Slc7a11
M23	101	Uniprot: Cell junction, synapse, presynaptic cell membrane	21	19	4	11.0702	0.000394599	0.0193354	0.0193354	Kcnc1; Adgrl1; Cntnap4; Syt7
M23	101	Uniprot: Cell membrane	670	580	30	2.57983	8.6189e-07	1.40775e-05	4.22326e-05	Kirrel2; Rgs8; Emp2; Ankrd27; Kcnb2; Kcnc1; Slc7a2; Gabrg2; Gna12; Kras; Efnb1; Ephb3; Aqp4; Cdc42; Lrig1; Alk; Il6st; Kcna6; Ano6; Kcnip4; Slitrk4; Lrfn3; Appl2; Igsf8; Lrrc8c; Kcnip2; Tesc; Neu3; Syt7
M24	98	CORUM: 5'-AMP-activated protein kinase complex (AMPK)	3	3	2	39.9184	0.000819311	0.0401462	0.0401462	Prkab2; Prkaa2
M24	98	Uniprot: Cell membrane	670	580	26	2.38375	1.54582e-05	0.00015149	0.000757451	Pi4ka; Tbc1d24; Ncs1; Necab2; Lancl2; Gfra2; Kcnh1; Rtn4rl2; Slc24a4; Rtn4rl1; Ehd3; Ehd1; Fam126b; Cacnb1; Sema6b; Slc2a3; Tenm4; Efr3b; Adgrl3; Unc5a; Spred2; Apbb1; Kcnip3; Cnr1; Prkd1; Scrib
M25	95	CORUM: ITGA5-ITGB1-ADAM15 complex	3	3	2	41.1789	0.000769931	0.0377266	0.0377266	Adam15; Itga5
M25	95	LopitDC: GA	45	16	6	8.27649	7.31857e-05	0.0035861	0.0035861	Slc35e1; Fam20b; Man1a2; B3gat3; Extl2; Golga5
M25	95	Uniprot: Cytoplasmic side	196	172	14	3.87303	0.000479534	0.0234972	0.0234972	Mcf2l; Cyb5r3; Atp6v0d1; Snx4; Rab8a; Rab10; Abhd17b; Rab39b; Rab1b
M25	95	Uniprot: Early endosome	58	49	6	6.39964	0.000312947	0.0076672	0.0153344	Rab22a; Snx4; Vps26a; Psen1; Bace1; Rab1a
M25	95	Uniprot: Late endosome	25	23	4	9.88632	0.000627568	0.0307508	0.0307508	Rab22a; Rab9; Bace1; Rab27a
M25	95	Uniprot: Lipid-anchor	149	139	13	3.99117	0.000820131	0.0200932	0.0401864	Cyb5r3; Rab8a; Rab10; Abhd17b; Fbxl2; Rab39b; Rab1b; Rab27a
M25	95	Uniprot: Recycling endosome membrane	38	36	5	8.34993	0.000288998	0.00708045	0.0141609	Syt5; Rab12; Rab8a; Rab10; Abhd17b
M26	95	CORUM: ITGA6-ITGB1-CD151 complex	3	3	2	41.1789	0.000769931	0.0377266	0.0377266	Itgb1; Itga6
M26	95	Uniprot: Single-pass type II membrane protein	72	60	9	7.57508	0.000121527	0.00297742	0.00595483	Ndst1; Ext2; Large1; Asph; B3galnt1; B3gat1
M27	91	WASH-iBioID	172	161	10	3.75607	0.000293013	0.0143576	0.0143576	Tppp; Amph; Prickle2; Etl4; Dlgap4; Syngap1; Dlgap3; Lrrc7; Shank2; Dlgap2
M27	91	CORUM: Dlg4-Dlgap1-Shank1 complex	3	3	3	64.4835	3.60932e-06	0.000176857	0.000176857	Shank1; Dlg4; Dlgap1
M27	91	CORUM: DLG4-DLGAP1-SHANK2 complex	3	3	3	64.4835	3.60932e-06	0.000176857	0.000176857	Dlg4; Shank2; Dlgap1
M27	91	CORUM: DLG4-DLGAP1-SHANK3 complex	3	3	2	42.989	0.000706454	0.0346162	0.0346162	Dlg4; Dlgap1
M27	91	CORUM: Dlgap1-Dlg4-Begain complex	3	3	3	64.4835	3.60932e-06	0.000176857	0.000176857	Begain; Dlg4; Dlgap1
M27	91	CORUM: DLGAP1-DLG4-DYNLL2 complex	3	3	2	42.989	0.000706454	0.0346162	0.0346162	Dlg4; Dlgap1
M27	91	CORUM: GluR delta-2 complex, postsynaptic	6	5	4	42.9963	7.92626e-07	3.88387e-05	3.88387e-05	Shank1; Dlg4; Shank2; Homer1
M27	91	CORUM: Psd95-Nos1-Grin2b complex	3	3	2	42.989	0.000706454	0.0346162	0.0346162	Grin2b; Dlg4
M27	91	Uezu et al., 2016: ePSD	114	99	19	10.7747	3.57583e-15	1.75216e-13	1.75216e-13	Kalrn; Dlg3; Begain; Cyld; Prickle2; Anks1b; Dlg2; Fnbp1l; Dlgap4; Grin2b; Dlg4; Dlgap3; Lrrc7; Shank2; Dlgap2; Dlgap1; Btbd11; Shisa7; Cacng3
M27	91	Uniprot: Cell junction, synapse	91	72	7	4.97633	0.000471446	0.0231009	0.0231009	Tln2; Dlg4; Dlgap3; Erc2; Shank2; Dlgap1; Homer1
M27	91	Uniprot: Cell junction, synapse, postsynaptic cell membrane	40	33	5	8.07005	0.000342442	0.0167797	0.0167797	Ank2; Grip1; Grin2b; Rph3a; Grin2d
M27	91	Uniprot: Cell junction, synapse, postsynaptic density	47	41	8	10.9871	4.6634e-07	2.28507e-05	2.28507e-05	Dlg2; Grip1; Dlg4; Dlgap3; Lrrc7; Shank2; Srcin1; Homer1
M27	91	Uniprot: Cell junction, synapse, presynaptic active zone	7	7	4	36.8477	1.82876e-06	8.96094e-05	8.96094e-05	Erc2; Pclo; Bsn; Unc13a
M27	91	Uniprot: Cell projection, dendritic spine	38	35	5	8.48901	0.000268508	0.0131569	0.0131569	Arhgap44; Dlg4; Shank2; Homer1; Rph3a
M27	91	Uniprot: Cytoplasm, cytoskeleton	210	185	14	4.31722	3.25307e-06	8.35931e-05	0.000159401	Kalrn; Dnm1; Tln2; Tppp; Ank2; Wdr47; Mical3; Ablim1; Grin2b; Erc2; Bcas3; Srcin1; Bsn; Epb41
M27	91	Uniprot: Cytoplasm, myofibril, sarcomere, M line	3	3	2	42.989	0.000706454	0.0346162	0.0346162	Ank2; Sptbn1
M29	86	CORUM: Apg16L-Apg12-Apg5 complex	3	3	2	45.4884	0.000630909	0.0309145	0.0309145	Atg16l1; Atg12
M32	81	LopitDC: NUCLEUS/CHROMATIN	1210	574	37	2.45534	1.85056e-08	3.02258e-07	9.06775e-07	Btbd1; Cdk7; Mtcl1; Selenoh; Usp22; Zfp91; Jmjd1c; Smarca2; Zc3h4; Lsm8; Ppp1r10; Ddx42; Cwf19l2; Cdkn2aip; Rcc2; Ilkap; Wdr74; Rrp9; Eif3m; Npm3; Cd2bp2; Prkrip1; Cenpv; Ssbp3; Gtf2e2; Prpf4; Rps6ka4; Sart1; Chd2; Stag2; Ercc3; Mybbp1a; Samd4b; Trrap; Anapc5; Nkrf; Bcas2
M32	81	Uniprot: Nucleus, nucleolus	113	97	8	5.18871	0.000135871	0.00182199	0.00665767	Rcc2; Wdr74; Rpp25; Rrp9; Npm3; Prkrip1; Mybbp1a; Bcas2
M33	78	LopitDC: ER	248	195	15	4.59135	5.75911e-07	7.05491e-06	2.82196e-05	Sptlc1; Sec61a1; Dpy19l3; Lss; Clptm1l; Slc33a1; Pkd2; Agpat1; Tmem131; Kdsr; Cept1; Tmtc3; Pigu; Alg9; H13
M33	78	Uniprot: Endoplasmic reticulum membrane	301	268	19	4.77549	6.87386e-09	8.42048e-08	3.36819e-07	Arxes1; Sptlc1; Sigmar1; Sts; Sec61a1; Lss; Gramd1a; Pkd2; Agpat1; Fmo5; Tm7sf2; Cept1; Rnf170; Tmem259; Agpat4; Alg9; Lpcat3; H13; Selenok
M34	70	CORUM: ESCRT-II complex	3	3	3	83.8286	1.62633e-06	7.969e-05	7.969e-05	Vps36; Vps25; Snf8
M34	70	CORUM: Raf1-PP2A holoenzyme complex (Ppp2r1a, Ppp2r2b, Ppp2ca), PDGF stimulated	4	4	2	41.9143	0.000828813	0.0406118	0.0406118	Ppp2r2b; Raf1
M34	70	CORUM: Zip-Prkcz-Kcnab2 complex	3	3	2	55.8857	0.000417631	0.0204639	0.0204639	Prkcz; Sqstm1
M35	66	CORUM: v-ATPase-Ragulator-AXIN/LKB1-AMPK complex	14	10	3	19.0649	0.000451924	0.0221443	0.0221443	Atp6v1a; Atp6v1b2; Atp6v0c
M35	66	CORUM: Vacuolar ATPase	13	9	6	41.0629	2.58132e-09	1.26485e-07	1.26485e-07	Atp6v1a; Atp6v1e1; Atp6v0c; Atp6v1f; Atp6v1c1; Atp6v0a1
M35	66	Takamori et al., 2006: Other trafficking proteins	31	25	6	17.2258	9.43446e-07	4.62288e-05	4.62288e-05	Syt2; Synpr; Scamp5; Syngr1; Syp; Syn3
M35	66	Takamori et al., 2006: Transporter / Channel	35	30	13	33.0515	1.59974e-17	7.83872e-16	7.83872e-16	Slc32a1; Atp6v1e1; Atp6v1b2; Atp6v0c; Sv2c; Atp6v1h; Atp6v1f; Sv2a; Atp6v1g2; Atp6v1c1; Atp6v0a1; Slc30a3; Slc17a6
M35	66	Takamori et al., 2006: All	290	251	24	7.4069	1.46105e-15	7.15913e-14	7.15913e-14	Ptpn9; Slc32a1; Syt2; Atp6v1e1; Atp6v1b2; Atp6v0c; Rogdi; Sv2c; Synpr; Atp6v1h; Arfip2; Wdr7; Atp6v1f; Snap29; Sv2a; Scamp5; Atp6v1g2; Atp6v1c1; Atp6v0a1; Syngr1; Slc30a3; Syp; Slc17a6; Syn3
M35	66	Uniprot: Cell junction, synapse, synaptosome	30	27	4	11.8606	0.000320481	0.0157036	0.0157036	Lgi3; Slc30a3; Syp; Slc17a6
M35	66	Uniprot: Cytoplasmic vesicle, secretory vesicle, synaptic vesicle	13	13	3	20.5175	0.000358666	0.0175746	0.0175746	Rogdi; Lgi3; Slc30a3
M35	66	Uniprot: Cytoplasmic vesicle, secretory vesicle, synaptic vesicle membrane	33	27	11	29.6667	2.41076e-14	1.18127e-12	1.18127e-12	Sv2c; Dmxl2; Tmem163; Tprgl; Sv2a; Scamp5; Syngr1; Slc30a3; Syngr3; Syp; Slc17a6
M36	61	CORUM: Exocyst complex	8	8	7	84.1721	7.30946e-14	3.58164e-12	3.58164e-12	Exoc7; Exoc4; Exoc5; Exoc3; Exoc8; Exoc1; Exoc2
M36	61	CORUM: Exocyst EXOC5-EXOC6-EXOC7 subcomplex	3	3	2	64.1311	0.000316792	0.0155228	0.0155228	Exoc7; Exoc5
M36	61	CORUM: GALNS-lysosomal hydrolase 1.27 MDa complex	4	3	2	48.1066	0.000629126	0.0308272	0.0308272	Glb1; Ctsa
M36	61	LopitDC: LYSOSOME	60	43	20	32.1585	2.02399e-26	9.91757e-25	9.91757e-25	Man2b1; Ctsl; Ctsb; Gusb; Ctsd; Glb1; Dpp7; Cpq; Lgmn; Ctsa; Arsa; Arsb; Scpep1; Man2b2; Grn; Npc2; Gba; Plbd2; Gm2a; Ctsz
M36	61	Uniprot: Lysosome	58	52	9	14.9423	5.46555e-09	2.67812e-07	2.67812e-07	Ctsl; Ctsb; Gusb; Glb1; Lgmn; Arsa; Arsb; Grn; Npc2
M36	61	Uniprot: Midbody, Midbody ring	11	11	4	34.9806	3.30399e-06	0.000161896	0.000161896	Exoc7; Exoc4; Exoc1; Exoc2
M37	58	LopitDC: NUCLEUS/CHROMATIN	1210	574	24	2.22422	4.55048e-05	0.000445947	0.00222974	H1f0; Paxbp1; Sfswap; Fbxw11; Cavin2; Tent4b; Rprd2; Utp25; Actr8; Zgpat; Dnajc9; Ddx27; Cmas; Ppil4; Ppie; Mecp2; Cavin1; Wdr18; Fbxo11; Vrk1; Pum3; Macroh2a2; Ints11; Nol7
M37	58	Uniprot: Membrane, caveola	17	14	3	17.8631	0.000564012	0.0217508	0.0276366	Cavin2; Cavin3; Cavin1
M38	57	CORUM: CCC complex	12	8	7	60.0936	4.23824e-12	2.07674e-10	2.07674e-10	Commd3; Ccdc93; Commd7; Vps35l; Commd2; Commd1; Ccdc22
M38	57	CORUM: CCC-Wash (WASH1, FAM21C) complex	14	10	9	66.2256	7.63531e-16	3.7413e-14	3.7413e-14	Commd3; Washc2; Ccdc93; Commd7; Vps35l; Commd2; Commd1; Washc1; Ccdc22
M38	57	CORUM: CCDC22-CCDC93-C16orf62 complex	3	3	3	102.947	8.69315e-07	4.25964e-05	4.25964e-05	Ccdc93; Vps35l; Ccdc22
M38	57	CORUM: CCDC22-CCDC93-C16orf62-FAM21-WASH1 complex	5	5	5	102.947	7.23411e-11	3.54471e-09	3.54471e-09	Washc2; Ccdc93; Vps35l; Washc1; Ccdc22
M38	57	CORUM: CCDC22-COMMD1-CUL2 complex	3	3	2	68.6316	0.000276411	0.0135441	0.0135441	Commd1; Ccdc22
M38	57	CORUM: Class C Vps complex (hVPS11, hVPS18, hVPS16, rVPS33a )	4	4	4	102.947	8.00393e-09	3.92192e-07	3.92192e-07	Vps18; Vps11; Vps16; Vps33a
M38	57	CORUM: Class C Vps complex (hVPS11, hVPS18, rVPS33a )	3	3	3	102.947	8.69315e-07	4.25964e-05	4.25964e-05	Vps18; Vps11; Vps33a
M38	57	CORUM: Class C Vps complex (VPS11, VPS18, STX7)	3	3	2	68.6316	0.000276411	0.0135441	0.0135441	Vps18; Vps11
M38	57	CORUM: Class C Vps complex (VPS11, VPS18, VPS16)	3	3	3	102.947	8.69315e-07	4.25964e-05	4.25964e-05	Vps18; Vps11; Vps16
M38	57	CORUM: Class C VPS/HOPS complex	6	6	3	51.4737	1.70287e-05	0.000834408	0.000834408	Vps18; Vps11; Vps16
M38	57	CORUM: COMMD1-CCDC22-CCDC93-C16orf62 complex	4	4	4	102.947	8.00393e-09	3.92192e-07	3.92192e-07	Ccdc93; Vps35l; Commd1; Ccdc22
M38	57	CORUM: COMMD1-CCDC93-C16orf62 complex	3	3	3	102.947	8.69315e-07	4.25964e-05	4.25964e-05	Ccdc93; Vps35l; Commd1
M38	57	CORUM: CORVET complex	6	6	4	68.6316	1.18329e-07	5.79813e-06	5.79813e-06	Vps18; Vps11; Vps16; Vps33a
M38	57	CORUM: HOPS complex	6	6	4	68.6316	1.18329e-07	5.79813e-06	5.79813e-06	Vps18; Vps11; Vps16; Vps33a
M38	57	CORUM: PI4K2A-WASH complex	13	13	4	31.6761	5.36122e-06	0.0002627	0.0002627	Washc4; Fkbp15; Washc2; Washc5
M38	57	CORUM: WASH complex	5	4	4	82.3719	3.97032e-08	1.94546e-06	1.94546e-06	Washc4; Washc2; Washc5; Washc1
M38	57	CORUM: WASH-CAPZalpa/beta complex	7	6	4	58.8371	2.7392e-07	1.34221e-05	1.34221e-05	Washc4; Washc2; Washc5; Washc1
M38	57	McNally et al., 2017: Retriever Complex	3	3	2	68.6316	0.000276411	0.0135441	0.0135441	Vps26c; Vps35l
M38	57	Uniprot: Cytoplasmic vesicle, autophagosome	19	18	4	21.6768	2.78086e-05	0.00136262	0.00136262	Nbr1; Washc1; Vps16; Vps33a
M38	57	Uniprot: Early endosome	58	49	7	12.4437	1.13347e-06	5.554e-05	5.554e-05	Washc4; Fkbp15; Ccdc93; Washc5; Commd1; Vps18; Vps16
M40	51	LopitDC: MITOCHONDRION	450	296	26	6.82231	1.10186e-16	2.69955e-15	5.39909e-15	Gdap1; Hk1; Cpox; Opa1; Bcl2l13; Ndufaf2; Vdac2; Vdac3; Vdac1; Mtch1; Mtch2; Mfn2; Tdrkh; Rhot1; Tmem11; Hsdl1; Cisd1; Coa7; Trabd; Dnajc19; Ociad1; Tomm70a; Armc1; Tmem126a; Tomm40; Ak2
M40	51	Uniprot: Mitochondrion outer membrane	55	47	13	27.2328	3.39745e-16	1.66475e-14	1.66475e-14	Usp30; Gdap1; Hk1; Vdac2; Vdac3; Mff; Mfn2; Mief1; Cisd1; Slc25a46; Armc1; Tomm20; Tomm40
M41	46	CORUM: SNARE complex (Snap25, Syt1, Unc13b, Vamp2, Stx1b2, Stx1a)	6	6	2	42.5217	0.000884002	0.0433161	0.0433161	Syt1; Vamp2
M41	46	CORUM: SNARE complex (Stx1a, Snap25, Vamp2, Syt1)	4	4	2	63.7826	0.000357159	0.0175008	0.0175008	Syt1; Vamp2
M41	46	CORUM: SNARE complex (STX1A, STX1B, SNAP25, RAB3A, SYT1, VAMP2)	6	6	2	42.5217	0.000884002	0.0433161	0.0433161	Syt1; Vamp2
M41	46	CORUM: SNARE complex (Stx2, Snap25, Vamp2, Syt1)	4	3	2	63.7935	0.000357038	0.0174949	0.0174949	Syt1; Vamp2
M41	46	CORUM: SNARE complex (Stx3, Snap25, Vamp2, Syt1)	4	3	2	63.7935	0.000357038	0.0174949	0.0174949	Syt1; Vamp2
M41	46	CORUM: SNARE complex (Stx4, Snap25, Vamp2, Syt1)	4	4	2	63.7826	0.000357159	0.0175008	0.0175008	Syt1; Vamp2
M41	46	CORUM: SNARE complex (Vamp2, Snap25, Stx1a, Syt1, Cplx1)	5	5	2	51.0261	0.000592292	0.0290223	0.0290223	Syt1; Vamp2
M41	46	CORUM: SNARE complex (Vamp2, Snap25, Stx1a, Syt1, Cplx2)	5	4	2	51.0348	0.000592092	0.0290125	0.0290125	Syt1; Vamp2
M41	46	Takamori et al., 2006: Small GTPases and related proteins	34	33	6	22.5153	1.88798e-07	9.25111e-06	9.25111e-06	Rab3c; Rab26; Rab30; Rab27b; Rab3b; Rab15
M41	46	Takamori et al., 2006: All	290	251	11	4.87084	9.44706e-06	0.000115727	0.000462906	Rab3c; Rab26; Syt1; Dnajc5; Vamp2; Vat1; Syt12; Rab30; Rab27b; Rab3b; Rab15
M41	46	Uniprot: Cytoplasmic vesicle, secretory vesicle, chromaffin granule membrane	4	3	2	63.7935	0.000357038	0.0174949	0.0174949	Syt1; Dnajc5
M41	46	Uniprot: Mitochondrion outer membrane	55	47	10	23.2253	6.90315e-12	1.69127e-10	3.38254e-10	Miga1; Vps13a; Gpam; Mavs; Marchf5; Exd2; Cyb5b; Akap1; Rmdn3; Mfn1
M44	18	Uniprot: [Isoform 1]: Mitochondrion	5	4	2	130.422	8.83683e-05	0.00433005	0.00433005	Nit1; Aldh7a1

## Sheet: Pathways
Biological Pathway Information
Biological Pathway	All Group Members, Entrez Gene ID
WASH-iBioID	68767;319277;70829;223593;216810;54198;53382;74254;227541;13169;29819;15114;72238;16765;110355;70675;241134;19179;13043;56403;66314;386649;19087;28006;230861;209131;338355;268932;11308;104069;76813;67282;81489;329165;74383;58235;56370;20174;76156;229589;74103;208618;12929;17762;27041;215690;224105;19185;52822;68053;217869;18537;382253;69654;76484;75705;26931;13544;68505;66849;52906;207393;27062;7…
CORUM: (ER)-localized multiprotein complex, Ig heavy chains associated	12304;22027;18453;14828;19035;320011;67838;64136;12282;29867
CORUM: 12S U11 snRNP	20638;102632439;69878;20641;107686;67332;22608;76167;225027;67797;50996;68276;78372;66801
CORUM: 17S U2 snRNP	67958;13204;81898;68598;76479;20639;68981;15510;20638;22185;102632439;69878;20641;107686;67332;110809;75062;68015;319322;101943;107701;67465;212880;68479;27967;76938;66125;15353;67959;66055
CORUM: 18S U11/U12 snRNP	13204;81898;20638;102632439;69878;20641;107686;67332;22608;319322;101943;107701;22184;76167;67797;192159;50996;67197;67225;78372;66125;67178;66055
CORUM: 20S methylosome and RG-containing Sm protein complex	27374;20638;12729;20641;107686;67332
CORUM: 20S methylosome-SmD complex	27374;12729;20641;67332
CORUM: 20S proteasome	26444;19170;26440;19166;19167;26441;26442;19172;19175;19173;26446;26445;26443;19177
CORUM: 26S proteasome	26444;19182;19170;26440;19166;19167;26441;26442;19172;19175;19173;19181;23996;26446;26445;19185;26443;19179;19184;67089;19177;23997
CORUM: 28S ribosomal subunit, mitochondrial	24030;64659;65111;64655;64658;64657;77721;66128;67994;66407;66292;79044;121022;69527;218506;57312;64660;99045;59054;68565;14548;66230;66258;50529;118451;66242;68735;64656;66973
CORUM: 39S ribosomal subunit, mitochondrial	66845;94062;56284;56282;80907;68611;18120;19935;66493;27398;66047;68463;353242;67212;107732;68836;107733;28028;94067;107734;67707;60441;68499;52443;94065;67036;75398;66448;68537;78523;66163;94061;56280;67681;67308;69163;74600;18100;27397;216767;94063;27393;66223;27395;94066;94064;66419;67270
CORUM: 40S ribosomal subunit, cytoplasmic	20068;16785;16898;27050;20042;20085;76846;20103;67097;67427;20115;20116;267019;20055;20044;66475;20084;20090;68052;27207;20104;20054;20088;75617;27370;54127;14109;78294;66481
CORUM: 4E-T-DDX6-CNOT1 complex	234594;13209;74203
CORUM: 5'-AMP-activated protein kinase complex (AMPK)	19082;108079;108097
CORUM: 55S ribosome, mitochondrial	24030;64659;66845;94062;56284;65111;56282;64655;64658;64657;77721;66128;67994;66407;66292;79044;121022;69527;80907;68611;18120;19935;66493;27398;66047;68463;353242;67212;107732;68836;107733;28028;94067;107734;218506;57312;67707;60441;64660;68499;52443;94065;67036;75398;66448;68537;78523;66163;94061;99045;56280;67681;67308;69163;74600;59054;18100;27397;68565;216767;94063;27393;66223;27395;94066;94…
CORUM: 5FMC (Friends of Methylated Chtop) complex	75273;216156;80886;269536;76130
CORUM: 60S APC containing complex	103733;11789;29875;22142
CORUM: 6S methyltransferase complex	12729;20641;67332
CORUM: 7SK RNP complex	12455;192231;107951;28036
CORUM: 9S-cytosolic aryl hydrocarbon (Ah) receptor non-ligand activated complex	11632;15519;15516;11622
CORUM: Abca1-Apoa1-Snta1 complex	11303;11806;20648
CORUM: ABCB1-ANXA2-RACK1-SRC complex	12306;18671;20779;14694
CORUM: ABI3-WAVE2-CYFIP1 complex	20430;66610;242687
CORUM: Actin-ribonucleoprotein complex (POLR2A, GTF2F1, HNRNPU)	20020;98053;51810
CORUM: AFF4 super elongation complex (SEC)	192657;12455;72949;70122;107951;17355;13716;64144;74427;269344;93736
CORUM: Agap11-AP3 complex	11778;347722;64933;55946;11774
CORUM: AKAP13-MAP2K3-MAP3K20-MAPK14-PKN1 complex	26397;75547;320795;26416;65964
CORUM: AKAP5-PRKAR2A-PPP3CA complex	19087;238276;19055
CORUM: Akt-Arrb2-Ppp2ca-Ppp2r2a complex	11651;19052;71978;216869
CORUM: Akt-PHLPP1-PHLPP2-FANCI-FANCD2-USP1-UAF1 complex	98432;230484;11651;244650;67561;211651;208836
CORUM: AKT1-APPL1-HDAC3 complex, induced by IGF-1	15183;11651;72993
CORUM: ALL-1 supercomplex	20220;93762;99982;60406;23942;17192;21374;270627;21343;67155;140858;19384;214162;19646;20587;216848;433759;20624;213464;66464;245688;108143;68094;15182;68188;20588;20466;51786
CORUM: Alpha-dystrobrevin-ZO-1-actin complex	11461;21872;13527
CORUM: Alpha-GDI-Hsp90 chaperone complex, ATP dependent	14567;13002;15481;15519
CORUM: AMFR-ERLIN2-TMUB1 complex	244373;64295;23802
CORUM: Amfr-Vcp-Ngly1 complex	269523;59007;23802
CORUM: Amfr-Vcp-Ubxn1 complex	269523;225896;23802
CORUM: Amfr-Vcp-Ubxn1-Ngly1-Rad23b complex	19359;269523;225896;59007;23802
CORUM: AMPA receptor complex (anti-GluA1-a)	72978;69017;78070;319922;68404;14799;14800;53623;14802;13385;81904;229759;244723;12794;56177;260297;81905;54377;54376;72555
CORUM: AMPA receptor complex (anti-GluA1-b)	243499;72978;69017;78070;319922;68404;14799;14800;53623;14802;81904;229759;244723;12794;56177;260297;81905;54377;54376;72555
CORUM: AMPA receptor complex (anti-GluA1-c)	72978;69017;68404;14799;14800;53623;14802;81904;229759;244723;12794;56177;260297;54376;72555
CORUM: AMPA receptor complex (anti-GluA2-a)	72978;319922;68404;14799;14800;53623;14802;229759;244723;12794;56177;260297;54377;54376
CORUM: AMPA receptor complex (anti-GluA2-b)	243499;72978;69017;78070;319922;68404;14799;14800;53623;14802;81904;229759;244723;12794;66082;56177;260297;81905;54377;54376;72555
CORUM: Anaphase-promoting complex	217232;69957;17222;52563;56317;59008;52206;99152;68999;381580
CORUM: AnnexinVI-Fyn-Pyk2-RasGAP complex	11749;218397;19229;14360
CORUM: anti-BHC110 complex	99982;228913;14886;433759;56364;382034;15182;192285;15353;76007;217864
CORUM: Anti-HDAC2 complex	99982;23942;14886;19646;216848;116870;433759;56364;382034;107932;245688;15182;192285;20466;15353;76007;217864
CORUM: AP1 adaptor complex	11765;11766;108012;11769;11764;252903;11767;11768
CORUM: AP1B1-AP1G2-AP1M-1AP1S1 complex	11766;11769;11764;11767
CORUM: Ap1g1-Ap2a2-Dcx complex	13193;11772;11765
CORUM: AP3 adaptor complex	11774;11776;64933;11778;11775;11777;55946
CORUM: AP3-BLOC1 complex	11774;11776;20615;64933;11778;14533;11775;232946;73689;17828;11777;94245;117197;18457;55946
CORUM: AP4 adaptor complex	11781;108011;11782;67489
CORUM: AP5-SPG11-SPG15 complex	231855;381201;211978;214585;74385;69596
CORUM: APC-Asef-beta-catenin complex	226970;11789;12387
CORUM: APC-IQGAP1-CLIP-170 complex	11789;56430;29875
CORUM: APC-IQGAP1-Rac1 complex	11789;29875;19353
CORUM: Apg16L-Apg12-Apg5 complex	77040;11793;67526
CORUM: Apoptosis- and splicing-associated protein complex (ASAP-L), SAP18, RNPS1, Acinus-L	20220;19826;56215
CORUM: APP-APBB1-LRP1 complex	11785;11820;16971
CORUM: ARC complex	66213;26896;23989;69792;70625;19014;75613;59024;80509;67381;234959;327987;66948;70208;51813;264064;108098
CORUM: Arf1-Ap1g1-Ap1b1 complex	11765;11764;11840
CORUM: ARF1-ARL1-PKD2-ARFIP2 complex	104303;76932;11840;18764
CORUM: Arf1-beta/delta-coat protein subcomplex	11840;213827;70349
CORUM: ARHGEF2-MAPK1-MAPK3-PXN complex	26417;26413;19303;16800
CORUM: ARHGEF7-GIT2-PAK1 complex	18479;54126;26431
CORUM: Arp2/3 protein complex	11867;76709;56378;67771;68089;74117;66713
CORUM: ARRB1-ARHGEF18-ENAH complex, induce by EDN-1	109689;102098;13800
CORUM: Arrb1-Becn1-Pik3c3 complex, induced by (OGD) oxygen-glucose deprivation	56208;225326;109689
CORUM: Arrb2-Akt-Ppp2ca complex	11651;19052;216869
CORUM: Arrb2-Akt-Src complex, insulin induced	20779;11651;216869
CORUM: ATP synthasome	17705;11947;17706;11946;18674;11950;11957;11958;71679;66043;11949;11951;67942;28080;11740;228033
CORUM: AUP1-OS9-SEL1L-UBC6e-UBXD8 complex	216440;76577;20338;56228;11993
CORUM: Axin-Apc-Catnb-Gsk3b-Macf1 complex	11426;12005;56637;11789;12387
CORUM: Axin-PP2A A-PP2A C-GSK3-beta-beta-catenin complex	12005;12387;56637;226849
CORUM: AXIN1-APC-CTNNB1-GSK3B complex	12005;11789;12387;56637
CORUM: B-WICH complex	17913;93762;81898;110052;319955;18432;56200;22385;320277
CORUM: Bad-Gk-Wave1-Pkaca-Ppp1cc complex	18747;103988;19047;12015;83767
CORUM: BAF complex	93760;83766;56456;67155;20586;11461;11465;20587;239985;68094;20588;57376;83797
CORUM: BAG6-AMFR-FAF2 complex	224727;76577;23802
CORUM: BARD1-BRCA1-CSTF complex	108062;12189;67337;228410;12021
CORUM: BASC complex (BRCA1-associated genome surveillance complex)	27354;106344;19718;19687;12189;17350;17685;17535;17688;12144;11920;19360
CORUM: BBS-chaperonin complex	21454;12465;12462;12469;12464;12461;241950;71492;71769;59030
CORUM: BBS1-BBS4-BBS5-PKD1-TTC8 complex	18763;72569;52028;76260;102774
CORUM: BBS4 centriolar satellite complex	18536;102774;12009
CORUM: BBSome	100503572;319845;71492;72569;52028;76260;102774;67378
CORUM: BBSome core complex	319845;71492;52028;67378
CORUM: Bcar1-Crk-Ptk2-Rapgef1 complex	14083;12927;12928;107746
CORUM: Bcl-2-Beclin1-UVRAG-PI(3)KC3 complex	12043;56208;225326;75669;78610
CORUM: Beta-catenin-Cadherin-LAR complex	19268;12387;12558
CORUM: beta(1)-AR receptosome (ADRB1-SAP97-AKAP79-PRKAR2A)	11554;19087;238276;13383
CORUM: BHC complex	99982;433759;15182;192285;15353;217864
CORUM: BICD2-dynein-dynactin complex	13426;13191;76895
CORUM: Bin1-Dnm1-Ehbp1 complex	30948;13429;216565
CORUM: BIN1-EHBP1-RAB8A complex	30948;17274;216565
CORUM: BP-SMAD complex	12013;55994;14623;19182;13872;17859;21847;21810
CORUM: BRAF-MAP2K1-MAP2K2-YWHAE complex	109880;26396;22627;26395
CORUM: BRAF-RAF1-14-3-3 complex	110157;109880;22631
CORUM: BRAF53-BRCA2 complex	99982;12190;433759;15182;192285;15353;217864
CORUM: BRCA1-core RNA polymerase II complex	69241;20021;66420;20020;231329;69920;12189;245841;20022;17749;69833;67710;66491
CORUM: BRCA1-RNA polymerase II complex	69241;68705;13871;20021;66420;13872;21374;20020;74197;68153;231329;14884;98053;69920;12189;245841;20022;17749;69833;67710;66491;229906;108098;23894;209357;14885
CORUM: BRD7-SWI\u2013SNF complex	93760;27374;56456;67155;20586;68094;72057;20588;57376;83797;26992
CORUM: BRG1-SIN3A complex	93760;27374;56456;20586;19646;20587;66993;68094;15182;20588;83796;57376;83797;20466
CORUM: BRG1-SIN3A-HDAC containing SWI/SNF remodeling complex I	93760;27374;56456;20586;20587;68094;15182;20588;57376;83797;20466
CORUM: BRM-SIN3A complex	93760;27374;56456;67155;19646;20587;433759;66993;68094;15182;20588;83796;57376;83797;20466
CORUM: BRM-SIN3A-HDAC complex	93760;27374;56456;67155;20587;68094;15182;20588;83796;57376;83797;20466
CORUM: BRMS1-SIN3-HDAC complex	20467;60406;19646;433759;245688;15182;20466;107392
CORUM: BVR-PKCD-ERK2 complex	26413;109778;18753
CORUM: c-Abl-CAS-Abi1 complex	11350;12927;11308
CORUM: c-Abl-cortactin-nmMLCK complex	11350;13043;107589
CORUM: c-MYC-ATPase-helicase complex	56456;17869;20174;56505;100683
CORUM: c-Src immune complex	22143;20779;18754;18750;18753;14083;12389;26413;22142;14715;16706;26417;22330;19303
CORUM: C1q complex	12259;12260;12262
CORUM: C3G-Crkl-Shp2-Cbl-Egfr complex	12402;19247;12929;13649;107746
CORUM: C3G-Crkl-Shp2-Gab2-TrkA complex	18211;19247;12929;14389;107746
CORUM: C9orf72-SMCR8-WDR41 complex	237782;73205;218460
CORUM: CADM1-4.1B-MPP3 complex	13384;54725;13823
CORUM: CADM1-DLG1-MPP3-PIK3R1 complex	13383;18708;13384;54725
CORUM: Calcineurin (subunit CnA)-Cacng8-Tuba1a complex	19055;22142;81905
CORUM: Calcineurin complex (Calna, Cna2, Gria1, Gria2, Cacng8)	14799;14800;19058;19055;81905
CORUM: Calcineurin-FKBP12 complex	14225;19058;19055
CORUM: CAMK2-delta-MASH1 promoter-coactivator complex	11545;20779;20020;108058;15205;53610;12914;18519
CORUM: CAP-cbl-flotilin complex	14251;12402;20411
CORUM: CART complex	15239;60595;55992;17919
CORUM: CAS-SRC-FAK complex	20779;12927;14083
CORUM: Casein kinase II (beta-dimer, alpha, alpha')	13000;13001;12995
CORUM: Cask-Grip1-Gria2-Mint1 complex	319924;14800;74053;12361
CORUM: Cask-Grip1-Prkce-Rgs4-Gria2 complex	18754;14800;19736;74053;12361
CORUM: CASK-LIN7C-APBA1 complex	12361;319924;22343
CORUM: Caveolar macromolecular signaling complex	11555;19088;12391;14683;11514;12288;51792
CORUM: Caveolin complex	109754;12389;11461;11465;12390;14252
CORUM: CB1-Gphn-Nlgn2 complex	216856;330914;268566
CORUM: Cbl-Frs2-Grb2 complex	12402;14784;327826
CORUM: CCC complex	54638;70829;71517;99311;52245;17846;66398;66199;27784;76501;12238;69456
CORUM: CCC-Wash (WASH1, FAM21C) complex	68767;54638;70829;71517;99311;52245;17846;66398;66199;27784;76501;12238;28006;69456
CORUM: CCDC22-CCDC93-C16orf62 complex	54638;70829;71517
CORUM: CCDC22-CCDC93-C16orf62-FAM21-WASH1 complex	68767;54638;70829;71517;28006
CORUM: CCDC22-COMMD1-CUL2 complex	54638;71745;17846
CORUM: CCNT1- CDK9-GRN complex	12455;14824;107951
CORUM: CCR4-NOT complex	234594;232791;58184;231464;78893;72068;18983;52846;104625
CORUM: CCR4-NOT-CNOT7-CNOT6 complex	234594;232791;58184;228140;78893;72068;18983;52846;104625
CORUM: CCR4-NOT-CNOT7-CNOT6L complex	234594;232791;58184;231464;228140;78893;72068;18983;52846
CORUM: CCR4-NOT-CNOT8-CNOT6 complex	234594;232791;58184;228140;78893;72068;69125;52846;104625
CORUM: CCR4-NOT-CNOT8-CNOT6L complex	234594;232791;58184;231464;228140;78893;72068;69125;52846
CORUM: CCT complex (chaperonin containing TCP1 complex)	21454;12466;12465;12462;12469;12464;12461;12468
CORUM: CCT complex (chaperonin containing TCP1 complex), testis specific	12468;12464;21454;12467;12462;12465;12461;12469
CORUM: CCT-Pdcl complex	12465;12468;12464;21454;12466;12462;12461;12469;67466
CORUM: CCT-Prefoldin complex	14976;67199;22327;12468;12464;21454;12466;12462;12465;12461;12469;56612;109054;18637
CORUM: CCT-Prefoldin complex, testis specific	14976;67199;22327;12468;12464;21454;12467;12462;12465;12461;12469;56612;109054;18637
CORUM: CD98-LAT2-ITGB1 complex	16412;17254;50934
CORUM: Cdc42-Par6b-Par3-Prkci complex	12540;18759;93742;58220
CORUM: CDC5L complex	78887;53892;53317;81898;68183;68981;15481;21973;21413;71514;19655;19045;20641;107686;67332;19090;20382;110809;67781;319322;13424;107701;66882;231659;71702;66070;28000;106583
CORUM: CDC5L core complex	53317;68183;15481;231659;71702;28000
CORUM: CDH4-HDAC2-MTA2-RBBP7-TWIST1 complex	23942;107932;22160;245688;15182
CORUM: Cdk5-Cdk5r1-Pctk1 complex	12568;12569;18555
CORUM: Cdk5-p39-CaMKII(alpha)-(alpha)actinin1 complex	12570;12322;12568;109711
CORUM: Cell division cycle complex (CDC27, CDC16, ANAPC7)	217232;69957;56317
CORUM: CEN complex	93762;12616;14828;15481;14113;12615;71819;12617;19763;20833;12417;99375;60532;13194;319876;66185;216152;71876;70454;71805;20419;64340;102920;109910;233532;19821;60411;52504;83701;207425;26934;26886;30951;66570;114741
CORUM: CF IIAm complex (Cleavage factor IIAm complex)	68219;69192;74737;13872;71514;22185;19205;17535;21872;53872;432508;269061;14885;98985;54451
CORUM: cGMP kinase signaling complex (IP3RI, IRAG, cGKI-beta, alpha-actin, calponin H1, PLN, RhoA)	18821;19091;11848;11475;12797;17540;16438
CORUM: CHIP-HSC70-TAU-UBCH5B complex	17762;15481;56550;56424
CORUM: CHUK-IQGAP2-AKAP8L-RELA-TNIP2 complex	12675;19697;544963;231130;54194
CORUM: CHUK-NFKB2-REL-IKBKG-SPAG9-NFKB1-NFKBIE-COPB2-TNIP1-NFKBIA-RELA-TNIP2 complex	18037;12675;70834;18033;18035;50797;18034;19697;19696;57783;231130;16151
CORUM: CIN85 complex (CIN85, CRK, BCAR1, CBL, PIK3R1, GRB2, SOS1)	12402;18708;12928;12927;14784;20662;58194
CORUM: Class C Vps complex (hVPS11, hVPS18, hVPS16, rVPS33a )	77573;80743;71732;228545
CORUM: Class C Vps complex (hVPS11, hVPS18, rVPS33a )	77573;71732;228545
CORUM: Class C Vps complex (VPS11, VPS18, STX7)	53331;71732;228545
CORUM: Class C Vps complex (VPS11, VPS18, VPS16)	80743;71732;228545
CORUM: Class C VPS/HOPS complex	271457;216238;269338;80743;71732;228545
CORUM: Cleavage stimulation factor	108062;67337;228410
CORUM: CLIC4 complex	12709;13430;11461;22627;22631;22142;29876
CORUM: CNOT1-CNOT2-CNOT3 complex	234594;232791;72068
CORUM: CNTF-CNTFR-gp130-LIFR complex	12803;12804;16195;16880
CORUM: Coat protein complex II (SAR1B, PREB, SEC23A , SEC24B, SEC23IP)	99683;20334;50907;66397;207352
CORUM: Coatomer complex	50797;59042;56447;213827;12847;70349;54161
CORUM: Coatomer-Arf1 complex	50797;59042;56447;11840;213827;12847;70349;54161
CORUM: Cofilin-actin-CAP1 complex	12631;11461;12331
CORUM: COG complex	233824;76332;16834;338337;97484;102339;238123;67542
CORUM: COG1-COG8-COG2-COG3-COG4 subcomplex	76332;16834;338337;97484;102339
CORUM: COG1-COG8-COG5-COG6-COG7 subcomplex	233824;16834;97484;238123;67542
CORUM: COG5-COG6-COG7 subcomplex	233824;238123;67542
CORUM: Cohesin-SA1 complex	19357;24061;20842;13006
CORUM: Cohesin-SA2 complex	19357;24061;20843;13006
CORUM: COMMD1-CCDC22-CCDC93-C16orf62 complex	54638;70829;71517;17846
CORUM: COMMD1-CCDC93-C16orf62 complex	70829;71517;17846
CORUM: CoREST-HDAC complex	99982;228913;433759;15182;192285;15353;217864
CORUM: CORVET complex	209018;73122;77573;80743;71732;228545
CORUM: CPSF6-ITCH-NUDT21-POLR2A complex	68219;20020;432508;16396
CORUM: CRBN-DDB1-CUL4A-RBX1 E3 ubiquitin ligase	100043674;99375;13194;58799
CORUM: CREBBP-SMAD2-SMAD4 pentameric complex	17128;17126;12914
CORUM: cRET-Shc-Grb2-Gab2-P85PI3K-Shp2 complex	18708;19247;19713;20416;14784;14389
CORUM: CRK-BCAR1-DOCK1 complex	12928;12927;330662
CORUM: CRM1-RAN-PHAX-CBC complex (cap binding complex)	103573;68092;19384;433702;56698
CORUM: CRMP-MICAL-PlexinA1 complex, induced by SEMA3A	12933;171580;18844
CORUM: CSA complex	100043674;209318;71991;99375;13194;26893;26754;108679;26891;26894;26572
CORUM: CSA-POLIIa complex	20020;100043674;209318;71991;99375;13194;26893;26754;108679;26891;26894;26572
CORUM: CtBP complex	12418;24136;99982;228913;21417;13017;13016;433759;329003;68750;15182;212391;110147;77683;217864;12593
CORUM: CtBP core complex	99982;21417;13017;13016;433759;15182;110147;77683;217864
CORUM: CTLH complex	59003;74125;56705;68477;27418
CORUM: CTNNB1-DDX5-HDGF complex	13207;12387;15191
CORUM: CTNNB1-FERMT2-YBX1 complex	12387;22608;218952
CORUM: CTTN-FER-PTK2 complex	14158;14083;13043
CORUM: CUL4A-DDB1-WDR5 complex	140858;99375;13194
CORUM: CUL4A-DDB1-WDR57 complex	99375;13194;66585
CORUM: CUL4A-DDB1-WDR61 complex	99375;13194;66317
CORUM: CUL4B-DDB1-WDR26 complex	72584;13194;226757
CORUM: Cx43-Tom20-Hsp90ab complex	14609;15516;67952
CORUM: Cytochrome bc1-complex (EC 1.10.2.2), mitochondrial	66445;100042918;67530;66152;17711;66594;22272;66694;67003;22273
CORUM: Cytochrome c oxidase, mitochondrial	17709;12858;12867;102638382;12857;12861;12866;110323;66142;12868;12864;19224;17708;17710;102640946;20930;226139;67899;66379;67105;66272;52469
CORUM: DCP1A-NR3C1-PNRC2-UPF1-complex	14815;19704;75901;52830
CORUM: DCS complex	19205;59013;16549;56195
CORUM: DCS complex (Ptbp1, Ptbp2, Hnrph1, Hnrpf)	59013;19205;56195;98758
CORUM: DDB2 complex	100043674;209318;99375;13194;26893;107986;26754;108679;26891;26894;26572
CORUM: DDN-MAGI2-SH3KBP1 complex	13199;50791;58194
CORUM: DDR1-PRKCZ-WWC1 complex	18762;12305;211652
CORUM: DDX11-RAD21-SMC1A-SMC3 complex	19357;24061;320209;13006
CORUM: DDX27-PeBoW complex	64934;12181;228889;57750
CORUM: Decapping complex	13209;234699;70640;353190;75901
CORUM: DGCR8 multiprotein complex	74326;14828;13207;17975;59013;51810;13211;16201;94223;67040
CORUM: DGKZ-RASGRP1-HRAS complex	19419;15461;104418
CORUM: DHX9-ADAR-vigilin-DNA-PK-Ku antigen complex	14375;22596;56417;19090;110611;13211
CORUM: DLC1-DLGAP1-MYO5A complex	224997;50768;17918
CORUM: Dlg3-Lin7a-Dlg1 complex	53310;13383;108030
CORUM: Dlg4-Cacng8-Calna complex	13385;19055;81905
CORUM: Dlg4-Dlgap1-Shank1 complex	13385;224997;243961
CORUM: DLG4-DLGAP1-SHANK2 complex	13385;224997;210274
CORUM: DLG4-DLGAP1-SHANK3 complex	224997;13385;58234
CORUM: DLG5-SORBS3-CTNNB1 complex	20410;12387;71228
CORUM: Dlgap1-Dlg4-Begain complex	380785;13385;224997
CORUM: DLGAP1-DLG4-DYNLL2 complex	224997;13385;68097
CORUM: DMAP1-associated complex	56456;21427;100043597;75560;78656;13831;66233;20174;56505;100683
CORUM: DNA-PK-Ku-eIF2-NF90-NF45 complex	13665;14375;22596;67204;26905;19090;67781;16201
CORUM: Dnajc5-Sgta complex	13002;15481;52551
CORUM: DNAJC7-HSPA8-HSP90AA1 complex	15519;15481;56354
CORUM: DNJC3-DNAJB1-HSPA8 complex	15481;81489;100037258
CORUM: DNMT3B complex	93762;16571;14211;433759;20466;70099;13436
CORUM: DRIP complex	66213;26896;23989;69792;70625;22337;20182;19014;59024;67381;234959;327987;70208;216154
CORUM: Drosha complex	13204;59013;67040;14000;13207;230908;76936;94223
CORUM: DSS1 complex	12190;20422;71957;109077;72656;101861;232798;70422;210925;77065;70885;18130
CORUM: Dynein complex	13424;67068;15502;56455;13427;13426;110350;235661;100040531
CORUM: Dynein-2 complex, cytoplasmic	67117;56455;100040531;209586;110350;213575;75465;217935;66061;71820;68097;67068
CORUM: Dystrobrevin-syntrophin complex, brain-derived	13528;13405;20648;13527
CORUM: Dystrophin-sarcoglycan-syntrophin complex, skeletal muscle	13405;24052;24053;24051;20391;20648
CORUM: E6AP-HERC2-MAPK6-NEURL4 complex	15204;22215;50772;216860
CORUM: EARP complex	68299;224705;73288;68505
CORUM: EB1-APC-mDia1 complex	13367;13589;11789
CORUM: EBAFa complex	93760;56456;20586;64144;20587;68094;20588;83796;57376;83797
CORUM: EBAFb complex	56456;20586;64144;20587;239985;68094;20588;83796;57376;83797
CORUM: Ecsit complex (Ecsit2, Smad1, Smad4)	17125;17128;26940
CORUM: Ecsit complex (ECSIT, MT-CO2, GAPDH, TRAF6, NDUFAF1)	17709;14433;26940;69702;22034
CORUM: Ecsit complex (ECSIT, MT-CO2, NDUFA1, MT-ND1, TRAF6, NDUFAF1)	54405;17709;17716;26940;69702;22034
CORUM: Ecsit complex (ECSIT, NDUFS3, NDUFAF1)	68349;26940;69702
CORUM: Ecsit complex (ECSIT, NDUFS3, TOM20)	68349;67952;26940
CORUM: EGFR-CBL-GRB2 complex	13649;12402;14784
CORUM: Egfr-Grb2-mSos1 complex, EGF stimulated	13649;20662;14784
CORUM: EIF2B1-EIF2B2-EIF2B3-EIF2B4-EIF2B5 complex	217715;224045;209354;108067;13667
CORUM: EIF2B2-EIF2B3-EIF2B4-EIF2B5 complex	217715;224045;108067;13667
CORUM: EIF3 complex (EIF3A, EIF3B, EIF3G, EIF3I, EIF3C)	53356;27979;54709;13669;56347
CORUM: EIF3 complex (EIF3A, EIF3B, EIF3G, EIF3I, EIF3J)	53356;78655;27979;54709;13669
CORUM: EIF3 complex (EIF3B, EIF3G, EIF3I)	53356;27979;54709
CORUM: eIF3 complex (EIF3S6, EIF3S5, EIF3S4, EIF3S3, EIF3S6IP, EIF3S2, EIF3S9, EIF3S12, EIF3S10, EIF3S8, EIF3S1, EIF3S7, PCID1)	66085;55944;68135;53356;78655;27979;16341;54709;13669;98221;56347;73830;223691
CORUM: EIF3 core complex (EIF3A, EIF3B, EIF3G, EIF3I)	53356;27979;54709;13669
CORUM: ELMO1-DOCK1-CRKII complex	12928;330662;140580
CORUM: ELMO1-DOCK1-RAC1 complex	19353;330662;140580
CORUM: Elongator holo complex	230233;58523;77766;74195
CORUM: Elongin (SIII) complex	67673;67923;27224
CORUM: Emerin architectural complex	16905;16906;13726;11461;64685;20740
CORUM: Emerin complex 1	17886;13726;11461;71602;20740;71994;380928;66641
CORUM: Emerin complex 25	23825;76522;20823;16906;54401;13726;11461;15387;22627;20641;27041;12539;269003;66165;27756
CORUM: Emerin complex 32	20220;15183;16906;19650;13726;11461;19651;20587;21849;64685;433759;20740;107932;68094;20588;81004;66310;403171;67381;217864
CORUM: Emerin complex 52	68278;76522;21833;12709;15388;16906;22630;29875;13726;15191;11461;15387;22627;20641;51810;12261;19651;16201;64685;18569;11800;380664
CORUM: Emerin-actin-NMI-(alphaII)spectrin complex	13726;11461;64685;20740
CORUM: Endocytic coat complex (11 subunits)	11771;218038;30948;20404;20405;67300;13429;20616;13858;104015
CORUM: Epsin-clathrin complex	218038;13854;11772;11773;20616
CORUM: erlin1/2-RNF170 complex	226144;244373;77733
CORUM: ESCRT-II complex	70160;27681;28084
CORUM: ESCRT-III complex	68953;67064;66371;208092;75608;234852;76959;68942;66700
CORUM: ESR1-CDK7-CCNH-MNAT1-MTA1-HDAC2 complex	13982;12572;66671;17420;116870;15182
CORUM: ESR1-TRAP/Mediator coactivator-complex	66213;26896;23989;69792;13982;51813;264064;328572;108098;19014;17977;59024;28077;56771;234959;327987;70208;216154
CORUM: ESR2-TRAP/Mediator coactivator complex	66213;26896;23989;69792;51813;264064;328572;108098;19014;17977;13983;59024;28077;56771;234959;327987;70208;216154
CORUM: Exocyst complex	105504;211446;102058;107371;20336;66482;69940;53413
CORUM: Exocyst EXOC5-EXOC6-EXOC7 subcomplex	105504;107371;53413
CORUM: Exon junction complex (EIF4A3, MLN51, MAGOH, Y14)	192160;192170;17149;60365
CORUM: Exon junction complex (EIF4A3, MLN51, UPF3B, MAGOH, Y14, PYM)	192160;192170;17149;68134;78428;60365
CORUM: Exosome	50912;50911;227715;66446;72544;69639;109075;27998;66362;72662;66583;213550;68533
CORUM: F0F1 ATP synthase, mitochondrial	57423;17705;11947;17706;11946;11950;11957;11958;71679;66043;11949;11983;11951;27425
CORUM: FACT complex, UV-activated	13000;13001;12995;20833;114741
CORUM: FACT-NEK9 complex	20833;217718;114741
CORUM: FARP2-NRP1-PlexinA1 complex	18186;227377;18844
CORUM: FARP2-NRP1-PlexinA2 complex	18186;18845;227377
CORUM: FARP2-NRP1-PlexinA3 complex	18186;227377;18846
CORUM: FARP2-NRP1-PlexinA4 complex	18186;227377;243743
CORUM: FCP1-associated protein complex	27374;231329;98053;13877;106504;70465;67655
CORUM: FGFR2-c-Cbl-Lyn-Fyn complex	14360;17096;14183;12402
CORUM: FHF complex	320191;74349;170833;14339;77963
CORUM: Fhl1-Pdlim1-Gsn-Actn1 complex	54132;227753;14199;109711
CORUM: FIB-associated protein complex	27374;14113;12261;22142;15469;545486
CORUM: Frataxin complex	27425;15510;66945;15526;14297;380840;69597
CORUM: Frs2-Grb2-Sos1 complex	14784;20662;327826
CORUM: FYN-KHDRBS1-PLCG1 complex	14360;18803;20218
CORUM: Fzd7-Gnas-Pik3r1 complex	18708;14683;14369
CORUM: G alpha-13-Hax-1-cortactin-Rac complex	23897;11651;13043;14674
CORUM: GAA1-GPI8-PIGT-PIG-PIGS complex	14731;329777;78928;276846;228812
CORUM: GABA-A receptor (GABRA1, GABRB2, GABRD)	14403;14394;14401
CORUM: GABA-A receptor (GABRA1, GABRB2, GABRG2)	14394;14406;14401
CORUM: GABA-A receptor (Gabra4, Gabrb3, Gabrd)	14403;14397;14402
CORUM: GABA-A receptor (Gabra5, Gabrb2, Gabrg2)	14406;110886;14401
CORUM: GABA-A receptor (Gabra5, Gabrb3, Gabrg2)	14406;110886;14402
CORUM: GABAB core receptor	242425;243043;383348;239217;207474;54393
CORUM: GAIT complex	56403;14433;107508;22121
CORUM: GALNS-lysosomal hydrolase 1.27 MDa complex	19025;12091;50917;18010
CORUM: Gamma-BAR-AP1 complex	11765;11766;108012;11769;11764;211556;252903;11767;11768
CORUM: Gamma-tubulin complex	103733;259279;328580;233276;74237;51885
CORUM: GARP complex	68299;224705;245944;68505
CORUM: Gata1-Fog1-MeCP1 complex	433759;22761;14460;15182;19646;245688;107932;116870;229542;116871;23942;17192;17191
CORUM: GATOR complex	277854;110379;17168;319481;56032;72124;268933;252875
CORUM: GATOR2 complex	110379;319481;72124;268933;252875
CORUM: GCN5-TRRAP histone acetyltransferase complex	109115;101206;102162;12189;17685;17688;24075;108143;14534;100683
CORUM: GIT1-ARHGEF7-PAK1-PXN complex	19303;18479;54126;216963
CORUM: GluR delta-2 complex, postsynaptic	243961;14816;14804;13385;210274;26556
CORUM: GluR1-cadherin-catenin complex	14799;12387;12558
CORUM: Glur2-Glur4-Plp-Itgav complex	16410;14800;14802;18823
CORUM: Glur4-cadherin-catenin complex	14802;12387;12558
CORUM: Glutamate receptor complex (GRIN1, GRIN2A, GRIN2B), ionotropic, NMDA-type	14811;14810;14812
CORUM: GNAI1- GNB5-GNG4 complex	14697;14706;14677
CORUM: GNAI1-GNB1-GNG3 complex	14688;14677;14704
CORUM: GNAI1-GNB1-GNG4 complex	14706;14688;14677
CORUM: GNAI1-GNB2-GNG12 complex	14693;14677;14701
CORUM: GNAI1-GNB2-GNG3 complex	14693;14677;14704
CORUM: GNAI1-GNB2-GNG4 complex	14706;14693;14677
CORUM: GNAI1-GNB4-GNG12 complex	14677;14696;14701
CORUM: GNAI1-GNB4-GNG3 complex	14677;14704;14696
CORUM: GNAI1-GNB4-GNG4 complex	14706;14677;14696
CORUM: GNAI1-GNB5-GNG12 complex	14697;14677;14701
CORUM: GNAI1-GNB5-GNG3 complex	14697;14677;14704
CORUM: GNAQ-GEFT-RHOA complex	14682;11848;52666
CORUM: GNAS-L-GNB1-GNG1 complex	14688;14683;14699;14697
CORUM: GNAS-L-GNB1-GNG12 complex	14688;14683;14701
CORUM: GNAS-L-GNB1-GNG3 complex	14688;14683;14704;14695
CORUM: GNAS-L-GNB1-GNG4 complex	14706;14688;14683
CORUM: GNAS-L-GNB2-GNG12 complex	14693;14683;14701
CORUM: GNAS-L-GNB2-GNG3 complex	14693;14683;14704
CORUM: GNAS-L-GNB2-GNG4 complex	14706;14693;14683
CORUM: GNAS-L-GNB4-GNG12 complex	14683;14696;14701
CORUM: GNAS-L-GNB4-GNG2 complex	14702;14683;14696;14697
CORUM: GNAS-L-GNB4-GNG3 complex	14683;14704;14696
CORUM: GNAS-L-GNB4-GNG4 complex	14706;14683;14696
CORUM: GNAS-L-GNB5-GNG12 complex	14697;14683;14701
CORUM: GNAS-L-GNB5-GNG3 complex	14697;14683;14704
CORUM: GNAS-L-GNB5-GNG4 complex	14697;14706;14683
CORUM: gp78-VCP-DERL1 complex	269523;67819;23802
CORUM: GPR56-CD81-Galpha(q/11)-Gbeta complex	14672;14682;12520;14688;14766
CORUM: Grasp1-Grip1-Glur2 complex	14800;74053;54645
CORUM: Gria2-Grip1-Nsg1-Stx12 complex	100226;18196;14800;74053
CORUM: Grip-Glur2/3-liprin-alpha complex	14800;53623;74053;68507
CORUM: Grk6-Ags3-Galphai2 complex, CXCL8 activated	26385;14678;67839
CORUM: GSK3B-HSP90AA1-PKM2 complex	15519;18746;56637
CORUM: H2AX complex I	18148;11545;14828;15270;12317;72831;382522
CORUM: H2AX complex II	18148;14828;15270;56449;12317;319178;382522;69956;319187
CORUM: H2AX complex, isolated from cells without IR exposure	74326;20823;18148;14828;18458;15270;12317;20833;382522;223691;114741
CORUM: hASC-1 complex	56404;77987;69090;75452
CORUM: HCF-1 complex	233904;108155;20467;60406;15519;20683;14828;15481;15525;15161;140858;19646;433759;245688;15182;20466;71954;23808
CORUM: HDAC1-associated core complex cI	99982;433759;217864
CORUM: HDAC1-associated core complex cII	23942;17192;19646;216848;433759;245688;234366;17191;217864
CORUM: HDAC1-associated protein complex	99982;23942;17192;19646;216848;433759;245688;17191;217864
CORUM: Hdac1-Ino80-Kdm1a-Phb2-Rbp1-Taf5 complex	433759;12034;19659;68142;99982;226182
CORUM: HDAC2-asscociated core complex	23942;17192;19646;216848;245688;234366;15182
CORUM: Hdac2-Mecp2-Sin3a-Smarca2 complex	15182;67155;20466;17257
CORUM: HDAC3-H1.3-SMRT-N-Cor complex	15183;20185;14957;20602
CORUM: HERP1/HEY2-NCOR-SIN3A complex	433759;20466;15214;20602
CORUM: HES1 promoter corepressor complex	20020;12572;19664;328572;20926;12914
CORUM: HES1 promoter-Notch enhancer complex	12455;20020;18128;264064;12572;107951;19664;328572;19014;20926;103806;19062;114741
CORUM: HOPS complex	218035;77573;269338;80743;71732;228545
CORUM: HRD1 complex	244373;14828;22027;12215;216440;74126;76577;66753;116891;97863;20338;56228;11993
CORUM: HSP70-BAG5-PARK2 complex	50873;193740;15525;70369
CORUM: HSP90-CDC37-LRRK2 complex	15516;12539;66725
CORUM: hTREX84 complex	107829;66231;386612;331401;225160;73666
CORUM: Htt-Hap1-Dctn1 complex	13191;15114;15194
CORUM: HuR-Tia1-Tiar-Hrnpu complex	15568;21843;21841;51810
CORUM: I-kappa-B kinase complex	16150;12675;16151
CORUM: IGF1R-CXCR4-GNAI2-GNB1 complex	14678;16001;12767;14688
CORUM: IGF2BP1 complex	56403;20853;19941;20104;22608;51810;13211;15568;140486
CORUM: Ikaros complex	22780;433759;15182;22779;20588;22778;20586;19646;83797;66993;107932;83796
CORUM: IKBKB-CDC37-KIAA1967-HSP90AB1-HSP90AA1 complex	16150;15519;15516;12539;219158
CORUM: IL6ST-PRKCD-STAT3 complex	16195;20848;18753
CORUM: ILK-HSP90-CDC37 complex	15519;16202;12539
CORUM: ILK-LIMS1-PARVA complex	110829;16202;57342
CORUM: Immunoproteasome	19170;19171;19167;16913;16912;19166;19172;26443;26441;26446;26445;26440;26444;26442
CORUM: ING2 complex	94246;60406;238247;19646;433759;245688;52592;15182;20466;269003;69260;71954;107392
CORUM: INO80 chromatin remodeling complex	56456;21423;227195;235134;225280;233875;51812;70020;56249;109275;68142;20174;56505
CORUM: INPP5E-PDE6D-RPGR complex	18582;19893;64436
CORUM: InsP3R1-HAP1A-Htt complex	16438;15194;15114
CORUM: Insr-Arrb2-Akt-Src complex, insulin induced	20779;16337;11651;216869
CORUM: Insr-Irs1-Iqgap1 complex	16337;16367;29875
CORUM: Integrator complex	71957;229543;109077;72656;68510;71793;101861;70422;210925;77065;70885;18130
CORUM: Integrator-RNAPII complex	20020;231329;71957;229543;109077;72656;68510;71793;101861;70422;210925;77065;70885;18130
CORUM: Intraflagellar transport complex A	73668;213081;106633;81896;74682
CORUM: Intraflagellar transport complex B	264134;21821;55978;72421;76779;74019;12589;67694;67042;67286;76568;73916;68259;67661;245866;72938
CORUM: Intraflagellar transport complex B core complex	264134;21821;72421;12589;67694;67042;67286;76568;245866;72938
CORUM: Iqgap1-Actb-Vim complex	29875;22352;11461
CORUM: Iqgap1-Cdc42-Ctnnb1-Cdh2 complex	29875;12540;12387;12558
CORUM: IRF2BP2-IRF2BP1-IRF2BPL complex	270110;272359;238330
CORUM: Irs1-Grb2-Ptpn1 complex	19246;16367;14784
CORUM: Itga-Itgb1-Ppap2b complex	16412;16402;67916
CORUM: ITGA3-ITGB1-BSG complex	16412;16400;12215
CORUM: ITGA3-ITGB1-CD151 complex	16412;16400;12476
CORUM: Itga3-Itgb1-Tgm2 complex	16412;16400;21817
CORUM: ITGA5-ITGB1-ADAM15 complex	16412;16402;11490
CORUM: ITGA5-ITGB1-CAL4A3 complex	16412;16402;12822
CORUM: ITGA5-ITGB1-FN-1-NOV complex	14268;16412;16402;18133
CORUM: ITGA5-ITGB1-FN1-TGM2 complex	14268;16412;16402;21817
CORUM: Itga5-Itgb1-Tgm2 complex	16412;16402;21817
CORUM: ITGA6-ITGB1-CD151 complex	16412;16403;12476
CORUM: ITGA6-ITGB4-Laminin10/12 complex	16776;16777;226519;192897;16403;16779
CORUM: ITGAV-ITGB5-ADAM9 complex	16410;16419;11502
CORUM: Itgb1-Rap1a-Prkd1 complex	16412;109905;18760
CORUM: ITGB5-ITGAV-VTN complex	22370;16410;16419
CORUM: JBP1-pICln complex	27374;20638;12729
CORUM: Kaiso-NCOR complex	15183;21372;230674;20185;16551;56310;56805;107684;81004;94093
CORUM: KAT2A-Oxoglutarate dehydrogenase complex	13382;78920;18293;14534
CORUM: Kcna1-Kcna4-Kcnab1-Lgi1 complex	16485;16492;16497;56839
CORUM: KICSTOR complex	230676;101142;270802;70394
CORUM: Kif13a-AP1 complex	11764;11765;11767;16553
CORUM: Kif17-Lin10-Lin2-Lin7-NR2B complex	319924;12361;14812;108030;16559
CORUM: Kif1ba-Dlg4-Dlg1-Magi2 complex	50791;16561;13385;13383
CORUM: Kif3-cadherin-catenin complex	12558;12388;16579;12387;16569
CORUM: Kif3a-Pard3-Prkci complex	18759;16568;93742
CORUM: KIF3A/B-PAR-3-aPKC-PAR-6 complex	16569;18759;93742;56513;16568
CORUM: Kinase maturation complex 1	15519;15516;22630;54401;15525;22628;22627;22631;22629;23938;12539;224619;13728;26406;68559;18637
CORUM: Kinase maturation complex 2	73174;15519;15516;22030;12539;21353;27215;56480
CORUM: Kinesin II complex (Kif3a-Kif3b-Kifap3)	16568;16579;16569
CORUM: KLC2-nKHC-uKHC kinesin complex	16594;16572;16573
CORUM: Ksr1 complex (Ksr1, Mek, 14-3-3, Mapk), EGF stimulated	26395;26413;22631;16706
CORUM: Ksr1 complex (Ksr1, Mek, 14-3-3), unstimulated	26395;22631;16706
CORUM: KSR1-BRAF-MEK complex	109880;26395;16706
CORUM: Ksr1-CK2 complex	13000;13001;12995;16706
CORUM: Ksr1-CK2-MEK-14-3-3 complex, PDGF treated	13000;26395;22631;13001;12995;16706
CORUM: Ksr1-Mek-Braf complex, EGF induced	109880;26395;16706
CORUM: Ksr1-Mek-Braf-Erk complex, EGF induced	109880;26395;16706;26417
CORUM: Ksr1-PP2A core enzyme complex (Ppp2r1a, Ppp2ca), untreated	19052;16706;51792
CORUM: Ksr1-PP2A holoenzyme complex (Ppp2r1a, Ppp2r2b, Ppp2ca), PDGF stimulated	19052;16706;72930;51792
CORUM: KSR1-RAF1-MEK complex	110157;26395;16706
CORUM: Kv4.2-DPPX-KChIP channel complex	13483;16508;70357
CORUM: Kv4.2-KChIP3-Dpp10 channel complex	16508;269109;56461
CORUM: LARC complex (LCR-associated remodeling complex)	93760;23942;17192;56456;15381;20586;11461;19646;20587;433759;107932;68094;229542;15182;19708;20588;83796;57376;17191
CORUM: Large Drosha complex	13205;50926;13204;13207;59013;76936;51810;67781;16201;230908;94223;104721;70439;67040;20815;232989;14000;19383
CORUM: LARP1-PABPC1-RYDEN complex	18458;73158;319278
CORUM: LAS1L-PELP1-TEX10-WDR18-NOL9-SENP3 complex	74035;75273;216156;80886;269536;76130
CORUM: LAT-PLC-gamma-1-p85-GRB2-CBL-VAV-SLP-76 signaling complex, C305 activated	16797;22324;18803;12402;18708;14784;16822
CORUM: LAT-PLC-gamma-1-p85-GRB2-SOS signaling complex, C305 activated	16797;18803;18708;14784;20662
CORUM: LGR4-RSPO supercomplex	13543;13367;26396;29875;19303;26395;14083;107515;72780
CORUM: LIN2-LIN7-SAP97 complex	108030;12361;13383
CORUM: LIN2-LIN7-SAP97-MINT1 complex	108030;12361;319924;13383
CORUM: Lin7b-MPP5-Patj complex	12695;22342;56217
CORUM: LKB1-STRAD-MO25 complex	20869;72149;12283
CORUM: LMO4-gp130 complex	12702;16451;16195;16911;19247
CORUM: LSm1-7 complex	67207;67678;78651;66094;27756;66373;50783
CORUM: LSm2-8 complex	76522;67678;78651;66094;27756;66373;50783
CORUM: M1 mAChR-TRPC6-PKC complex	18750;12669;22068
CORUM: MAP2K1-BRAF-RAF1-YWHAE-KSR1 complex	110157;109880;22627;26395;16706
CORUM: MeCP1 complex	23942;17192;19646;433759;107932;245688;15182;17191;229542
CORUM: MeCP2-SIN3A-HDAC complex	17257;433759;15182;20466
CORUM: Mediator complex	381379;66213;26896;23989;69792;70625;51813;264064;108098;20933;19014;68975;76199;75613;59024;80509;69790;28077;67219;78334;66999;56771;67381;234959;192191;67224;66172;327987;70208;216154;67279;57261;230753;74143
CORUM: Membrane protein complex (VCP, UFD1L, SEC61B)	269523;66212;22230
CORUM: MEP50-PRMT5-ICLN complex	27374;12729;70465
CORUM: Merlin-ERM-moesin-CD44 complex	17698;12505;22350;18016
CORUM: Mi2/NuRD complex	23942;17192;19646;433759;107932;245688;15182
CORUM: MIB complex	53375;17827;76614;433771;224904;68117;66098;68316;230935;66075;68653
CORUM: MICOS complex	76614;433771;224904;68117;66098;68316;66075
CORUM: mitochondrial permeability transition pore (PTP) complex (PPIF-SPG7-VDAC1)	22333;105675;234847
CORUM: MKK4-ARRB2-ASK1 complex	216869;26398;26408
CORUM: MKK4-ARRB2-JNK3 complex	216869;26398;26414
CORUM: MLL1 complex	17283;108155;15161;140858;214162;213464;66310;23808
CORUM: MLL1-WDR5 complex	228980;232714;50496;270627;15525;21343;15161;140858;214162;213464;24074;108143;225280;76719;104457;75273;68988;51812;19821;228829;80886;67773;67772;269536;23808;56505;76130
CORUM: MLL2 complex	17283;381022;108155;101739;15161;140858;213464;66310;23808;67933
CORUM: MMS19 complex	26371;72199;67563;68523
CORUM: MMXD complex	26371;11740;13871;72199;68523
CORUM: MNK1-eIF4F complex	13684;13681;208643;17346
CORUM: Modulator	67089;67151;19182
CORUM: MRIP-MBS-RHOA complex	17931;11848;26936
CORUM: mRNA decay complex (UPF1, UPF2, UPF3B, DCP2, XRN1, XRN2, EXOSC2, EXOSC4, EXOSC10, PARN)	74108;50912;227715;70640;24127;19704;68134;24128;326622;109075
CORUM: mSin3A complex	19646;433759;245688;15182;20466
CORUM: mSin3A-HDAC1-HDAC2 complex	433759;15182;20466
CORUM: MTA1 complex	17192;19646;116870;245688;433759;15182
CORUM: MTA1-HDAC core complex	19646;116870;245688;433759;15182
CORUM: MTA2 complex	23942;17192;19646;433759;107932;245688;15182;20466
CORUM: mTOR complex (MTOR, RICTOR, MLST8)	56717;78757;56716
CORUM: mTORC1 complex	56717;74370;56716
CORUM: mTORC2 complex	56717;78757;227743;56716
CORUM: Multicomponent signaling complex, anti-CD40 stimulated (Birc2, Birc3, Cd40, Ikbkg, Map2k4, Map2k7, Map3k1, Traf2, Ube2n)	11796;16151;21939;22030;26398;26401;93765;11797;26400
CORUM: Multicomponent signaling complex, anti-CD40 stimulated,(Birc2, Birc3, Cd40, Ikbkg, Map3k1, Traf2, Ube2n)	11796;16151;21939;22030;26401;93765;11797
CORUM: Multiprotein complex (mRNA turnover)	56403;229663;18458;11991;218693
CORUM: Multiprotein trafficking complex	319924;16515;13383;12361;22343
CORUM: Multisynthetase complex	66143;107508;226414;105148;104458;216443;13722;231872;85305;107045
CORUM: Munc13-1-Rim2-Rab3a complex	19339;382018;116838
CORUM: Mupp1-Dlg4-Syngap1-CamkII complex	17475;12323;12322;13385;240057
CORUM: MutS-alpha-PK-zeta complex	17685;17688;18762
CORUM: N-NOS-CHIP-HSP70-1 complex	193740;18125;56424
CORUM: Ncam-Fgfr4 signaling complex	20779;14432;17967;12558;14186;13043;18803;327826
CORUM: NCAM140-p59(fyn)-p125(fak) signaling complex	14083;17967;14360
CORUM: NCKAP1-WASF3-RAC1 complex	19353;245880;50884
CORUM: NCOR complex	15183;21372;20185;56310;107684;81004
CORUM: NCOR-HDAC3 complex	15183;21372;20185;56310;81004
CORUM: NCOR-SIN3-HDAC-HESX1 complex	20467;433759;15182;20466;15209;20602
CORUM: NCOR-SIN3-HDAC1 complex	433759;20466;20602
CORUM: NCOR-SIN3-RPD3 complex	20467;15182;20466;20602
CORUM: NCOR1 complex	15183;20185;20586;20587;21849;101943;67465;100043597;68094;20588
CORUM: NCOR2 complex	15183;20185;60406;433759;15182;20466;20602
CORUM: Neddylin ligase (FBXO11, SKP1, CUL1, RBX1)	100043674;21402;26965;225055
CORUM: Nephrin multiprotein complex	29875;50791;20740;12361;54631;20742;109711
CORUM: NG2-galectin-3-alpha3beta1-integrin complex	16412;16854;16400;121021
CORUM: Ng2-Grip1-Glur2 complex	14800;121021;74053
CORUM: Ngly1-Vcp-Ubxn1 complex	269523;225896;59007
CORUM: nKHC-KLC1-KLC2 kinesin complex	16593;16594;16572
CORUM: nKHC-KLC1-uKHC kinesin complex	16593;16572;16573
CORUM: Nkx3.2-SMAD1-SMAD4-HDAC-Sin3A complex	433759;17125;17128;12020;20466;19646;245688
CORUM: Nkx3.2-SMAD1-SMAD4-HDAC1 complex	433759;17125;17128;12020
CORUM: NMDA receptor complex (NR2A, NR2B, NR1, PSD-95)	13385;14810;14811;14812
CORUM: nNos-Capon-Syn1 complex	70729;20964;18125
CORUM: Nogo-potassium channel complex	16490;53321;16485;68585
CORUM: Nop56p-associated pre-rRNA complex	67134;66409;11740;67186;11837;18148;20068;21969;13629;16898;14957;57808;19989;319195;17975;14113;20042;22185;270106;110954;269261;20005;19934;67891;20813;27367;22121;66489;26451;100503670;19933;19943;76846;233870;67115;76936;53605;20826;19941;66480;19942;19981;20115;20116;267019;20055;20044;66475;20084;20090;68052;27207;27176;11475;20104;65019;20054;20088;19946;67248;114641;19896;621697;67025;269…
CORUM: Nphp1-Ptk2b-Bcar1-tensin complex	12927;209039;19229;53885
CORUM: NRD complex (Nucleosome remodeling and deacetylation complex)	99982;19646;216848;116870;433759;107932;15182
CORUM: Nsf-Stx1a-Napa complex	20907;108124;18195
CORUM: Nsf-Stx1a-NAPB complex	20907;17957;18195
CORUM: Nsf-Stx1a-NAPG complex	20907;108123;18195
CORUM: NSL complex	108155;15161;140858;76719;51812;228829;67773;69612;226976
CORUM: NuA4/Tip60 HAT complex	56456;81601;75560;78656;13831;66233;71777;21761;56505;100683;64050;227867;70088;20174
CORUM: NuA4/Tip60-HAT complex	64050;56456;56397;81601;75560;78656;13831;70088;66233;73247;71777;21761;20174;56505;100683;21427
CORUM: NuA4/Tip60-HAT complex A	64050;56456;227867;81601;75560;78656;13831;70088;66233;73247;71777;21761;20174;56505;100683
CORUM: NuA4/Tip60-HAT complex B	56456;81601;13831;66233;21761;20174;56505;100683
CORUM: Nuclear pore complex	69912;234865;231042;223921;70699;69736;18141;19069;54563;18226;170762;218210;269966;107939;71844;269113;66679;445007;227699;110379;71805;69482;72124
CORUM: NUMAC complex (nucleosomal methylation activator complex)	93760;20586;11461;20587;59035;68094;20588;57376;83797;78891
CORUM: Nup 107-160 subcomplex	269966;110379;103468;59015;69912;69736;234865;72124;445007
CORUM: NuRD.1 complex	17192;19646;116870;107932;245688;433759;15182;116871
CORUM: Oligosaccharyltransferase complex (Stt3A variant)	103963;20014;13200;16430;13135;67075
CORUM: Oligosaccharyltransferase complex (Stt3B variant)	103963;20014;13200;13135;80286;68292;67075
CORUM: P-TEFb-7SKRNA-HEXIM1 complex	12455;192231;107951
CORUM: p130Cas-ER-alpha-cSrc-kinase- PI3-kinase p85-subunit complex	13982;20779;18708;12927
CORUM: p14-Mp1-Erk1/2 complex	56692;26413;26417;83409
CORUM: p21(ras)GAP-Fyn-Lyn-Yes complex, thrombin stimulated	14360;22612;17096;218397
CORUM: p27-cyclinE-Cdk2 - Ubiquitin E3 ligase (SKP1A, SKP2, CUL1, CKS1B, RBX1) complex	12447;12566;12576;54124;100043674;21402;27401;26965
CORUM: P2X7 receptor signalling complex	60595;225115;16414;15516;193740;15481;19263;224020;11461;13384;16774;18439
CORUM: p300-CBP-p270-SWI/SNF complex	93760;20586;328572;20587;68094;12914;20588
CORUM: p400-associated complex	56456;11461;75560;20174;56505;100683
CORUM: p50-p65 NF(kappa)B-SRC1 complex	18033;19697;17977
CORUM: p54(nrb)-PSF-matrin3 complex	71514;17184;53610
CORUM: p85alpha-SHP2-Gab2 complex	19247;18708;14389
CORUM: p97-Ufd1-Npl4 complex	269523;22230;217365
CORUM: p97-Ufd1-Npl4-IP3 receptor complex	16438;269523;22230;217365
CORUM: PA28-20S proteasome	26444;19170;26440;19166;19167;26441;26442;19172;19175;19173;26446;26445;26443;19186;19177;19188
CORUM: PA28gamma-20S proteasome	26444;19170;26440;19166;19167;26441;26442;19172;19175;19173;26446;26445;26443;19192;19177
CORUM: PA700 complex	69077;66997;67151;59029;22123;53380;19182;19181;23996;57296;17463;19185;19179;19184;67089;21762;66413;66998;70247;23997
CORUM: PA700-20S-PA28 complex	69077;66997;67151;59029;26444;22123;53380;19182;19170;26440;19166;19167;26441;26442;19172;19175;19173;19181;23996;57296;26446;26445;17463;19185;26443;19179;19184;67089;19186;21762;66413;66998;19177;70247;19188;23997
CORUM: PAR-3-aPKC-Tiam2 complex	24001;18759;93742
CORUM: Par-3-KIF3A-PKC-zeta complex	18762;16568;93742
CORUM: PAR-3-PKCz-Tiam2 complex	24001;18762;93742
CORUM: Par3-Apc-Kif3a complex	11789;16568;93742
CORUM: Parvulin-associated pre-rRNP complex	19933;13204;66409;104346;17975;14268;27176;19989;11837;22121;110954;27367;14113;19899;76846;19988;270106;12607;19941;20116;20102;76808;20104;19896;27050;26961;22143;19921;20091;12181;22154;13207;55989;18432;66942;67949;228889;110109;230737;69237;76915;67115;59014;66480;434693;52513;67134;67891;67160;69072;56095;64934;27225;56200;67239;57750;68272;72119;69713
CORUM: PAS (PIKfyve-ArPIKfyve-Sac3) complex	234729;103199;18711
CORUM: PBAF complex (Polybromo- and BAF containing complex)	56456;20586;11461;20587;77044;66923;68094;20588;57376;83797
CORUM: Per1-Cry1-Cry2-Nono-Wdr5 complex	12952;140858;53610;18626;12953
CORUM: Per1-Nono-Wdr5 complex	140858;53610;18626
CORUM: Periaxin complex	12075;66395;19153;22352;22350;20743;107993;319504;18810
CORUM: pERK-vimentin-KPNA2 complex	22352;26417;16647
CORUM: Pex26-Pex6-Pex1 complex	71382;224824;74043
CORUM: PFKL-PFKM-PFKP complex	18641;56421;18642
CORUM: Phosphatidylinositol 4-kinase complex	224020;104718;14853;84652
CORUM: PI4K2A-WASH complex	11774;12345;13430;12340;67300;223593;319277;338355;28006;16801;16800;67299;84095
CORUM: Pigr-Vps35-Vps26a-Vps29 complex	18703;65114;30930;56433
CORUM: PIP complex	16202;110829;57342
CORUM: PKA (RII-alpha and RII-beta)-AKAP5-ADRB1 complex	11554;19087;238276;19088
CORUM: PlexinC1-SEMA7A complex	54712;20361;235611;20354
CORUM: Podxl-Nherf2-Ezr complex	22350;65962;27205
CORUM: POLR2A-CCNT1-CDK9-NCL-LEM6-CPSF2 complex	12455;17975;20020;107951;51786;19017
CORUM: Polyadenylation complex (CSTF1, CSTF2, CSTF3, SYMPK CPSF1, CPSF2, CPSF3)	108062;67337;94230;228410;68188;51786;54451
CORUM: Polycystin-1 multiprotein complex (ACTN1, CDH1, SRC, JUP, VCL, CTNNB1, PXN, BCAR1, PKD1, PTK2, TLN1)	109711;12550;20779;16480;22330;12387;19303;12927;18763;14083;21894
CORUM: Postsplicing complex	19826;19704;68134;67031;326622;53319;60365
CORUM: PP2A A/C-SG2NA complex	51792;19052;94186
CORUM: PP2A A/C-striatin complex	268980;51792;19052
CORUM: PP2A-NR3A complex	51792;71978;19052;242443
CORUM: Ppp2c-PKA-Ryr2-mAkap complex	20191;18747;19052;238161
CORUM: PPP2R1A-PPP2R1B-PPP2CA-PPME1-EIF4A1 complex	51792;73699;13681;19052;72590
CORUM: PRKAR2A-GSKIP-GSK3B-DNM1L complex	74006;19087;56637;66787
CORUM: PRKCZ-VAMP2-WDFY2 complex	22318;18762;268752
CORUM: Profilin 1 complex	18643;15481;269523;11465;67300;73710
CORUM: Profilin 2 complex	20964;50884;13429;11461;15481;19878;20965;20430;18645
CORUM: prohibitin 2 complex, mitochondrial	23897;11740;18673;22334;12034
CORUM: protein complex (DDX28; DHX30; GRSF1; FASTKD2; FASTKD5)	231413;72831;380601;71986;75619
CORUM: Protein-sorting complex (Stam1, Hgs, Eps15)	13858;20844;15239
CORUM: Protein-sorting complex (Stam2, Hgs, Eps15)	56324;13858;15239
CORUM: PS1-E-cadherin-catenin complex, brain	12550;12558;19164;12387
CORUM: PS1-E-cadherin-catenin complex, epithelial	12387;12385;12550;19164
CORUM: PSD95-FYN-NR2A complex	14360;13385;14811
CORUM: Psd95-Nos1-Grin2b complex	18125;13385;14812
CORUM: PTEN-NHERF1-EGFR complex	26941;13649;19211
CORUM: PU.1-Sin3A-Hdac-MeCP2 complex	433759;20375;20466;17257
CORUM: PYR complex	57376;11461;15289;15182;20588;22778;245688;83797;68094;107932;20587;56456
CORUM: RAB11B-SPG10-SPG33 complex	16572;19326;319740
CORUM: Rab3a-Rims2-Rapgef4 complex	19339;56508;116838
CORUM: RAB5-RABAPTIN5\u2013RABEX5 complex	271457;54189;56715
CORUM: RAB9-TIP47-MPRI complex	66905;16004;56382
CORUM: RAF1-MAP2K1-YWHAE complex	110157;22627;26395
CORUM: Raf1-PP2A core enzyme complex (Ppp2r1a, Ppp2ca), untreated	19052;51792;110157
CORUM: Raf1-PP2A holoenzyme complex (Ppp2r1a, Ppp2r2b, Ppp2ca), PDGF stimulated	19052;72930;51792;110157
CORUM: RAF1-PPP2-PIN1 complex	110157;51792;19053;71978;23988
CORUM: Ragulator-AXIN/LKB1-AMPK complex	12005;19082;56692;105787;66096;66508;68576;83409;19079;20869
CORUM: RalBP1-CCNB1-AP2A-NUMB-EPN1 complex	11771;268697;18222;19765;13854
CORUM: Rap1 complex	11545;14375;22596;17535;21750;19360;57321;21749;497652;28113;101185
CORUM: Rbx1- Cul1-Skp1-Fbxw8-Cul7-Rbx1	56438;231672;66515;21402;26965
CORUM: RC complex	19075;18971;18968;19076;19687;18972;69263;106344;18969;72151;19718
CORUM: RC complex during G2/M-phase of cell cycle	12534;11545;18968;21969;268697;19891;12428;68275;18971;68240;19718;19687;18973
CORUM: RC complex during S-phase of cell cycle	11545;18968;21969;19891;16881;12428;12566;68275;18971;68240;19718;19687;18973
CORUM: REP-RGGT-Rab complex	19339;12662;56187
CORUM: Respiratory chain complex I (beta subunit) mitochondrial	17992;70316;66046;66495;102631912;230075;68194;67264;68198;68197;68342;17719;17721;66916;104130;66218
CORUM: Respiratory chain complex I (early intermediate NDUFAF1 assembly), mitochondrial	75406;68349;230075;17716;67130;66108;69702
CORUM: Respiratory chain complex I (gamma subunit) mitochondrial	54405;66377;66091;67273;17716;17717;17718;17720;17722;68375;67130;66108;595136
CORUM: Respiratory chain complex I (holoenzyme), mitochondrial	225887;17992;70316;54405;17993;66046;66495;66377;17991;75406;226646;407785;102631912;68349;230075;66091;68194;67264;68198;66416;68197;67273;68342;17716;17717;17718;17720;17721;17722;66916;72900;227197;17995;68375;78330;67130;68202;66108;69875;104130;67184;66414;66218
CORUM: Respiratory chain complex I (incomplete intermediate), mitochondrial	17993;75406;226646;407785;67264;67273;72900;227197;17995;78330;66108
CORUM: Respiratory chain complex I (intermediate I/200kD and III/250kD), mitochondrial	226646;68349;66108
CORUM: Respiratory chain complex I (intermediate IV/310kD), mitochondrial	226646;68349;17716;66108
CORUM: Respiratory chain complex I (intermediate V/380kD and VI/480kD), mitochondrial	17991;226646;68349;17716;66108
CORUM: Respiratory chain complex I (intermediate VII/650kD), mitochondrial	17993;17991;75406;226646;68349;17716;72900;67130;66108
CORUM: Respiratory chain complex I (intermediate), mitochondrial	17993;17991;75406;226646;68349;230075;17716;72900;67130;66108
CORUM: Respiratory chain complex I (lambda subunit) mitochondrial	225887;17993;17991;75406;226646;407785;68349;66416;72900;227197;17995;78330;68202;69875;67184;66414
CORUM: Respiratory chain complex I (nuclear encoded subunits), mitochondrial	66414;227197;226646;68349;407785;68202;17995;67273;66108;75406;225887;68375;70316;17992;66495;67130;230075;66916;66218;66091;67264;68342;68198;17993;66377;102631912;595136;66046;68197;66416;104130;69875;67184
CORUM: Respiratory chain complex I (subcomplex I alpha), mitochondrial	66414;17722;227197;226646;68349;407785;68202;17995;67273;66108;75406;225887;68375;70316;67130;66916;66091;66416;69875;67184
CORUM: Respiratory chain complex I (subcomplex I beta), mitochondrial	17719;70316;66495;230075;66916;66218;67264;68342;68198;102631912;66046;104130
CORUM: Respiratory chain complex I, mitochondrial	104130;17716;17719;407785;230075;17992;66414;225887;227197;226646;78330;17995;67273;595136;68202;68197;17991;66091;68194;66046;66218;67130;66495;70316;66916;17993;67264;72900;66108;75406;68375;68342;68349;67184;17717;17721;66416;54405;17718;68198;69875;17720;17722;66377;102631912
CORUM: Retromer complex (SNX1, SNX2, VPS35, VPS29, VPS26A)	67804;30930;56440;65114;56433
CORUM: Retromer complex (SNX1, SNX2, VPS35, VPS29, VPS26B)	67804;56440;69091;65114;56433
CORUM: RGS7-Gbeta5-Galphaq complex	24012;14682;14697
CORUM: RIAM-Rap1-GTP-profilin complex	18643;109905;54519
CORUM: Ribosome, cytoplasmic	67186;11837;20068;16785;16898;57808;19989;319195;20102;27050;20042;270106;110954;269261;20005;19934;67891;20085;27367;22121;66489;26451;100503670;19933;19943;76846;20103;67097;623174;67115;67427;19941;66480;19942;19981;67281;20115;20116;267019;20055;20044;66475;20084;20090;68052;27207;27176;20104;65019;20054;20088;75617;27370;54127;14109;19946;67248;114641;19896;621697;67025;26961;78294;665964;67…
CORUM: RICH1-PAR3-aPKC polarity complex	18759;70497;93742
CORUM: RICH1/AMOT polarity complex, Flag-Amot precipitated	17475;27494;75739;70497;75723;56217;12695;56332
CORUM: RICH1/AMOT polarity complex, Flag-Rich1 precipitated	12345;12340;27494;70497;56217;12695;58194;12488
CORUM: RIN1-STAM2-EGFR complex, EGF stimulated	56324;13649;225870
CORUM: RIN1-STAM2-HRS complex	15239;56324;225870
CORUM: RNA pol II containing coactivator complex Tat-SF	20924;72459;17975;20020;107951
CORUM: RNA polymerase II (RNAPII)	69241;68705;20021;66420;20020;231329;98053;69920;245841;20022;17749;69833;67710;66491;229906;68925;67655
CORUM: RNA polymerase II complex (RPB1, RAP74, CDK8, CYCC, SRB7, BAF190, BAF47), chromatin structure modifying	51813;20020;98053;264064;67155;20587;108098
CORUM: RNA polymerase II complex, (CBP, RPBI, PCAF, BAF47), chromatin structure modifying	20020;20587;12914;18519
CORUM: RNA polymerase II complex, (CDK8 complex), chromatin structure modifying	51813;98053;264064;66671;20587;108098;68094;20588
CORUM: RNA polymerase II complex, chromatin structure modifying	21374;51813;20020;74197;14884;98053;264064;67155;229906;20587;108098;66556;18551;68094;20588;83797;56456;57376;13872;20586;209357;12914;18519
CORUM: RNA polymerase II core complex	69241;20021;66420;20020;231329;69920;245841;20022;17749;69833;67710;66491
CORUM: RNA polymerase II holoenzyme complex	69241;68705;13871;20021;66420;13872;21374;20020;74197;68153;231329;14884;98053;69920;245841;20022;17749;69833;67710;66491;229906;23894;209357;14885
CORUM: RNF20-RNF40-UbE2E1 complex	233900;22194;109331
CORUM: RPAP1-RPB2-RPB3 complex	20021;231329;68925
CORUM: RSmad complex	20586;17127;17128;17126;239985;68094;12914;20588;94093;17979
CORUM: RyR2 macromolecular complex	20191;19087;18747;19045;19052;14226
CORUM: SAGA complex, GCN5-linked	109115;101206;102162;72195;11486;24075;217218;66464;108143;72522;231151;14534;75565;407786;380753;216825;100683;225895
CORUM: Sam68-p85 P13K-IRS-1-IR signaling complex	16337;18708;16367;20218
CORUM: SAP complex (Sin3-associated protein complex)	60406;19646;433759;245688;94246;15182;20466;269003;71954
CORUM: Sarcoglycan-sarcospan-syntrophin-dystrobrevin complex	24052;24053;24051;20391;20648;16651;20649;13527
CORUM: SCAMP1-SCAMP2-SCAMP3 complex	24045;107767;24044
CORUM: Scrib-APC-beta-catenin complex	12387;11789;105782
CORUM: Scrib-Git1-Arhgef7 complex	216963;105782;54126
CORUM: SCRIB-GIT1-ARHGEF7 complex	54126;105782;216963
CORUM: SCRIB-GIT1-ARHGEF7-PAK1 complex	18479;54126;105782;216963
CORUM: SDCBP-CTNNB1-CTNNA1-CDH1 complex	12387;12385;12550;53378
CORUM: SDH-mABC1-PIC-ANT-ATPase complex	11946;18674;67680;11739;74610;66945
CORUM: SELK multiprotein complex	103963;20014;12330;13200;16430;269523;109815;67819;116891;80795
CORUM: SEMA6D-PlexinA1-NRP1 complex	18186;214968;18844
CORUM: Septin complex	18000;235072;20362;52398;53860
CORUM: Set1A complex	233904;140858;213464;77305;74322;23808;108155;15161;66310;67933
CORUM: Set1B complex	108155;15161;140858;213464;77305;665775;69556;66310;74322;23808;67933
CORUM: SF3b complex	81898;319322;101943;107701;68479;72047;66125;66055
CORUM: SIGMAR1-Cacna1b-CACNB1-CACNA2D1 complex	12287;12293;12295;18391
CORUM: SIN3 complex	20220;60406;19646;433759;245688;15182;20466
CORUM: SIN3-HDAC-SAP30-ARID4 complex	60406;19646;433759;245688;94246;15182;20466
CORUM: SIN3-ING1b complex I	20220;60406;19646;433759;245688;94246;15182;20466;26356
CORUM: SIN3-ING1b complex II	20220;93760;60406;56456;20586;19646;20587;433759;245688;94246;68094;15182;20588;83797;20466;26356
CORUM: SIN3-SAP25 complex	20220;60406;19646;433759;245688;94246;751865;15182;20466;269003;71954
CORUM: SKI-NCOR1-SIN3A-HDAC1 complex	20185;20481;433759;20466
CORUM: SLC2A1-DMTN-ADD2 complex	20525;11519;13829
CORUM: SMAD2-SMAD4-FAST1-TGIF-HDAC1 complex, TGF(beta) induced	14106;17128;433759;21815;17126
CORUM: Smarcb1-Smarca2-Mecp2 complex	67155;20587;17257
CORUM: Smcb-Smcd-PW29 complex	19357;24061;13006
CORUM: SMG-1-UPF-ERF1-ERF3 complex (SURF)	14852;225363;19704;233789
CORUM: SMG1-UPF2-Y14-MAGOH-UPF3B-EIF4A3 complex	192170;17149;233789;68134;326622;60365
CORUM: SMN-PolII-RHA complex	66603;20639;20638;21374;20020;276919;20646;229906;13211;53975
CORUM: SMRT complex	15183;21372;56310;81004;20602
CORUM: SNARE complex (Bet1, Gosr1, Gosr2, Scfd1, Stx5, Sec22b)	56494;56389;20333;12068;53334;76983
CORUM: SNARE complex (HGS, SNAP25, STX13)	15239;20614;100226
CORUM: SNARE complex (RINT1, ZW10, p31, Stx18)	26951;57296;71116;72772
CORUM: SNARE complex (RINT1, ZW10, p31)	26951;57296;72772
CORUM: SNARE complex (Snap25, Syt1, Unc13b, Vamp2, Stx1b2, Stx1a)	20979;20907;20614;56216;22318;22249
CORUM: SNARE complex (Snap25, Vamp3, Vamp2, Napa, Stx12)	100226;108124;20614;22319;22318
CORUM: SNARE complex (SNAP25, VAMP3, VAMP2, NAPB, STX13)	20614;22318;22319;100226;17957
CORUM: SNARE complex (Snap47, Stx1a, Vamp2)	20907;22318;67826
CORUM: SNARE complex (STX1A, CPLX2, SNAP-25, VAMP2)	20907;22318;12890;20614
CORUM: SNARE complex (Stx1a, Napa, Snap25, Vamp2, Nsf)	20907;108124;20614;22318;18195
CORUM: SNARE complex (Stx1a, Snap25, Cplx2, Vamp2)	20907;20614;22318;12890
CORUM: SNARE complex (Stx1a, Snap25, Stxbp5)	20907;20614;78808
CORUM: SNARE complex (Stx1a, Snap25, Vamp2, Syt1)	20979;20907;20614;22318
CORUM: SNARE complex (Stx1a, Snap25, Vamp2)	20907;20614;22318
CORUM: SNARE complex (STX1a, STX1b, SNAP25, RAB3a, SYT1, VAMP2, CPLX2)	19339;20907;20979;56216;22318;12890;20614
CORUM: SNARE complex (STX1A, STX1B, SNAP25, RAB3A, SYT1, VAMP2)	19339;20907;20979;56216;22318;20614
CORUM: SNARE complex (Stx1a,1b,7,13, Rtn1, Vamp2)	100226;53331;20907;56216;22318;104001
CORUM: SNARE complex (Stx2, Snap25, Vamp2, Cplx1)	13852;20614;12889;22318
CORUM: SNARE complex (Stx2, Snap25, Vamp2, Syt1)	20979;13852;20614;22318
CORUM: SNARE complex (Stx3, Snap25, Vamp2, Cplx1)	20614;12889;22318;20908
CORUM: SNARE complex (Stx3, Snap25, Vamp2, Syt1)	20979;20614;22318;20908
CORUM: SNARE complex (Stx4, Napa, Vamp3, Nsf, Vamp2)	108124;22319;22318;20909;18195
CORUM: SNARE complex (Stx4, Snap25, Vamp2, Syt1)	20979;20614;22318;20909
CORUM: SNARE complex (Stx4, Snap25, Vamp2)	20614;22318;20909
CORUM: SNARE complex (Stx4, Stx6, Stx7, Vamp3, Vamp7, Vamp8, Vti1b)	22320;53331;53612;22319;20955;20909;58244
CORUM: SNARE complex (STX4, VAMP1, VAMP7)	22317;20955;20909
CORUM: SNARE complex (Stx5, Gosr1, Bet1, Gef2)	93739;56389;12068;53334
CORUM: SNARE complex (Stx5, Gosr1, GS15)	54399;56389;53334
CORUM: SNARE complex (Stx5, Gosr2, Sec22b, Bet1)	56494;56389;20333;12068
CORUM: SNARE complex (Stx5, p97, Nsfl1c)	386649;269523;56389
CORUM: SNARE complex (Stx5, Ykt6, Gosr1, Bet1)	54399;56389;56418;53334
CORUM: SNARE complex (VAMP2, SNAP25, STX13)	20614;22318;100226
CORUM: SNARE complex (VAMP2, SNAP25, STX1a, CPLX1, CPLX3)	12889;20614;22318;20907;235415
CORUM: SNARE complex (Vamp2, Snap25, Stx1a, Cplx1)	20907;20614;12889;22318
CORUM: SNARE complex (VAMP2, SNAP25, STX1a, CPLX1)	12889;20614;22318;20907
CORUM: SNARE complex (VAMP2, SNAP25, STX1a, CPLX2)	20614;22318;20907;12890
CORUM: SNARE complex (VAMP2, SNAP25, STX1a, CPLX3, CPLX4)	20614;22318;20907;225644;235415
CORUM: SNARE complex (VAMP2, SNAP25, STX1a, STX3, CPLX1, CPLX3, CPLX4)	12889;20614;22318;20908;20907;225644;235415
CORUM: SNARE complex (Vamp2, Snap25, Stx1a, Syt1, Cplx1)	20979;20907;20614;12889;22318
CORUM: SNARE complex (Vamp2, Snap25, Stx1a, Syt1, Cplx2)	20979;20907;20614;22318;12890
CORUM: SNARE complex (VAMP4, STX6, STX16, VTI1a, VTI1b)	228960;58244;53330;53611;53612
CORUM: SNARE complex (Vamp4, Stx6, Stx16, Vti1a)	228960;53330;58244;53611
CORUM: SNARE complex (Vamp7, Stx5, Bet1, Vti1a)	56389;12068;20955;53611
CORUM: SNARE complex (Vti1b, Stx6, Stx7)	53331;53612;58244
CORUM: SNARE complex (Ykt6, Stx5, Gosr2, Bet1)	56494;56389;56418;12068
CORUM: SNF2h-cohesin-NuRD complex	19357;93762;23942;17192;19646;216848;116870;433759;24061;245688;20843;20842;15182;217578;17191;13006
CORUM: SNX complex (SNX1, SNX1a, SNX2, SNX4, EGFR)	67804;69150;13649;56440
CORUM: SNX complex (SNX1, SNX1a, SNX2, SNX4, INSR)	67804;69150;16337;56440
CORUM: SNX complex (SNX1, SNX1a, SNX2, SNX4, LEPR)	67804;69150;16847;56440
CORUM: SNX complex (SNX1, SNX1a, SNX2, SNX4, PDGFRA)	67804;69150;18595;56440
CORUM: SNX complex (SNX1, SNX1a, SNX2, SNX4)	67804;69150;56440
CORUM: SOG complex	110379;17168;230676;319481;56032;72124;268933;252875
CORUM: Sororin-cohesin complex	19357;24061;71521;67849;100710;13006
CORUM: SOS1-ABI1-EPS8 complex	20662;13860;11308
CORUM: SOS1-ABI1-EPS8L2 complex	20662;11308;98845
CORUM: SPG3A-SPG4-SPG31 complex	73991;52250;50850
CORUM: Spliceosome	140488;13205;56070;67958;14208;13204;70052;20227;70767;66101;53317;22680;72459;68219;69192;11834;71713;56194;81898;320632;68183;68598;76479;68879;67684;193116;70233;68592;20639;20637;68981;18458;20638;13207;22185;192170;72198;68092;100034361;20826;17149;102632439;69878;67678;78651;20641;107686;67332;20462;27366;20383;20382;69207;110809;57317;13211;433702;75062;24010;108014;67996;66053;319322;1913…
CORUM: SRC-1 complex	20822;17978;17977;12914
CORUM: SRC-3 complex	16150;12675;20822;17978;12914;16151;17979
CORUM: Src-dynamin-synapsin complex	20964;20779;13429
CORUM: Src-dynamin-synapsin-alpha-adaptin complex	20964;11772;13429;20779
CORUM: STAGA complex	246103;109115;101206;102162;72195;24075;101943;66464;108143;14534;27878;100683;225895
CORUM: STAGA complex, SPT3-linked	246103;109115;101206;102162;72195;24075;217218;66464;108143;231151;14534;27878;75565;269003;223527;216825;100683;225895
CORUM: STAT6-p100-RHA complex	20852;13211;56463
CORUM: Striatin-SG2NA-zinedin-caveolin1 complex	12389;97387;94186;268980
CORUM: STRIPAK complex	268980;51792;19052;229707;19070
CORUM: Succinate dehydrogenase complex II, mitochondrial	66945;67680;66925;66052
CORUM: Succinyl-CoA synthetase, ADP-forming	56451;20916;20917
CORUM: SWAP complex	17975;11545;18148;20947
CORUM: SWELL1-containing complex	72267;433926;231549;241296;100604
CORUM: SWI-SNF chromatin remodeling-related-BRCA1 complex	93760;56456;12189;67155;20586;20587;68094;20588;83796;57376
CORUM: SWI/SNF-related chromatin-remodeling complex	67155;17257;433759;57376;20466
CORUM: SWI/SNF-related chromatin-remodeling complex (Brm-based)	57376;15182;20588;67155;20466;20587;17257
CORUM: Synaptotagmin-sodium channel complex (Syt1-Scn2a-Scn1b)	110876;20979;20266
CORUM: Synaptotagmin-sodium channel complex (Syt1-Scn1a-Scn1b)	20265;20979;20266
CORUM: Synaptotagmin-sodium channel complex (Syt2-Scn1a-Scn1b)	20265;20980;20266
CORUM: Synaptotagmin-sodium channel complex (Syt2-Scn2a-Scn1b)	110876;20980;20266
CORUM: TBCD-ARL2-tubulin(beta) complex	22154;56327;108903
CORUM: TBCD-ARL2-tubulin(beta)-TBCE complex	22154;56327;70430;108903
CORUM: TBCD-tubulin(alpha)-tubulin(beta) complex	22154;22142;108903
CORUM: TBCE-TBCB-tubulin(alpha) complex	70430;22142;66411
CORUM: Tetrameric COG subcomplex	233824;97484;238123;67542
CORUM: TFIIH transcription factor complex	13871;13872;14884;12572;66671;17420;23894;209357;14885;66467
CORUM: TFIIIC containing-TOP1-SUB1 complex	21969;20024;233863;71752;269252;70239;98488
CORUM: TFTC complex (TATA-binding protein-free TAF-II-containing complex)	228980;246103;109115;101206;102162;21343;24075;101943;226182;24074;66464;108143;319944;14534;100683;225895;99730;407786
CORUM: TFTC-type histone acetyl transferase complex	26896;23989;13982;19014;14534;59024;234959;327987;70208;216154;100683
CORUM: THO complex	107829;66231;386612;331401;225160
CORUM: THSD1-FAK-talin-vinculin complex	22330;14083;56229;21894
CORUM: Thyroglobulin folding complex (Tg, Hspa5, Erp29, Grp94)	14828;21819;67397;22027
CORUM: Thyroglobulin folding complex (Tg, Hspa5, Pdi, Erp29, Grp94)	14828;21819;18600;67397;22027
CORUM: Tiam2-PAR-3-aPKC-PAR-6-Cdc42-GTP complex	24001;18759;56513;12540;93742
CORUM: Tiam2-PAR-3-aPKC-PAR-6-Rac1-GTP complex	24001;18759;56513;19353;93742
CORUM: TIP60 histone acetylase complex	56456;81601;20174;56505;100683
CORUM: TLE1 corepressor complex (MASH1 promoter-corepressor complex)	18148;11545;17975;15525;77579;11461;21974;21885;53610;19360
CORUM: TNF-alpha/NF-kappa B signaling complex (CHUK, BTRC, NFKB2, PPP6C, REL, CUL1, IKBKE, SAPS2, SAPS1, ANKRD28, RELA, SKP1)	67857;105522;12675;71474;21402;18034;19697;19696;26965;56489;243819;12234
CORUM: TNF-alpha/NF-kappa B signaling complex (CHUK, KPNA3, NFKB2, NFKBIB, REL, IKBKG, NFKB1, NFKBIE, RELB, NFKBIA, RELA, TNIP2)	18037;12675;18033;18035;18034;19698;19697;19696;18036;231130;16151
CORUM: TNF-alpha/Nf-kappa B signaling complex (RPL6, RPL30, RPS13, CHUK, DDX3X, NFKB2, NFKBIB, REL, IKBKG, NFKB1, MAP3K8, RELB, GLG1, NFKBIA, RELA, TNIP2, GTF2I)	13205;12675;18033;18035;26410;68052;19946;14886;18034;19698;19988;19697;19696;18036;231130;20340;16151
CORUM: TNF-alpha/NF-kappa B signaling complex (SEC16A, CHUK, IKBKB, NFKB2, REL, IKBKG, MAP3K14, RELA, FBXW7, USP2)	16150;227648;12675;53376;18034;19697;19696;50754;53859;16151
CORUM: TNF-alpha/NF-kappa B signaling complex 10	12675;15519;15516;109658;18036;12539;77040;56480;16151
CORUM: TNF-alpha/NF-kappa B signaling complex 5	16150;12675;70333;20019;18033;328949;72416;76784;16647;245841;66491;21402;18034;19697;19696;544963;26965;18036;18567;64424;20017;226525;103583;20018;16151
CORUM: TNF-alpha/NF-kappa B signaling complex 6	16150;12675;15519;15516;14113;67891;68052;27207;19946;26961;19988;12539;53859;16151
CORUM: TNF-alpha/NF-kappa B signaling complex 9	12675;15516;14229;18036;12539
CORUM: TNF-R1-associated signaling complex	16150;12675;21926;21937;22030;11796;19766;57783;71609;66513;268749;24105;68652;16151
CORUM: Toposome	15381;21973;13211;20833;192159;20815;56200
CORUM: Transcription elongation factor complex (SUPT5H, CDK9, CCNT1)	20924;12455;107951
CORUM: Translocon-associated protein (TRAP) complex	107513;66256;20832;67437
CORUM: TRAPP complex	27096;67091;66226;216131;692132;320714;78232;66682;217449;76510;59005;60409;75964;245828
CORUM: TRBP containing complex (DICER, RPL7A, EIF6, MOV10 and subunits of the 60S ribosomal particle)	67186;57808;19989;270106;269261;19933;19943;623174;67115;16418;66480;19942;19981;27176;19946;19896;621697;67025;19921;76808;17454;225215;192119;100043718
CORUM: TRBP containing complex (DICER, TRBP, AGO2, RPL7A, EIF6, MOV10)	16418;27176;21357;17454;239528;192119
CORUM: TrkB-Slp1-Rab27b-Crmp2-Kinesin-1 complex	16593;12934;16573;269589;18212;16572;80718
CORUM: TSC (TSC1, TSC2, AXIN, GSK3) complex	12005;22084;56637;64930
CORUM: Tubulin polyglutamylase complex	66648;319953;102747;110012;66257
CORUM: Ubiquilin-proteasome complex	26440;19166;26443;22215;54609;56085
CORUM: Ubiquilin-VCP-erasin complex	269523;67812;56085
CORUM: Ubiquitin E3 ligase (Asb2, Tceb1, Tceb2, Cul5, Rbx1)	67673;67923;56438;65256;75717
CORUM: Ubiquitin E3 ligase (BTRC, CUL1, RBX1, SKP1)	100043674;21402;26965;12234
CORUM: Ubiquitin E3 ligase (CDC34, NEDD8, BTRC, CUL1, SKP1A, RBX1)	100043674;21402;26965;18002;12234
CORUM: Ubiquitin E3 ligase (CSN1, CSN8, HRT1, SKP1, SKP2, CUL1, CUL2, CUL3)	100043674;21402;209318;27401;26965;71745;26554;108679
CORUM: Ubiquitin E3 ligase (CUL1, FBXO10, SKP1)	21402;26965;269529
CORUM: Ubiquitin E3 ligase (CUL1, FBXO6, RBX1, SKP1)	100043674;21402;26965;50762
CORUM: Ubiquitin E3 ligase (Cul3, GAN1, Rbx1)	26554;56438;209239
CORUM: Ubiquitin E3 ligase (CUL3, KLHL12, PEF1, PDCD6)	18570;26554;240756;67898
CORUM: Ubiquitin E3 ligase (DDB1, DDB2, CUL4A, CUL4B, RBX1)	100043674;99375;72584;13194;107986
CORUM: Ubiquitin E3 ligase (DDB1, DYRK2, EDD, VPRBP)	70790;13194;69181;321006
CORUM: Ubiquitin E3 ligase (DDIT4, DDB1, BTRC, CUL4A)	99375;13194;74747;12234
CORUM: Ubiquitin E3 ligase (Fbxl20, Skp1, Cul1)	72194;21402;26965
CORUM: Ubiquitin E3 ligase (Fbxo2, Skp1a, Cul1, Rbx1)	56438;230904;21402;26965
CORUM: Ubiquitin E3 ligase (FBXO31, SKP1A, CUL1, RBX1)	100043674;21402;26965;76454
CORUM: Ubiquitin E3 ligase (Fbxo32, Skp1a, Cul1, Rbx1)	56438;67731;21402;26965
CORUM: Ubiquitin E3 ligase (FBXW11, SKP1, CUL1)	21402;26965;103583
CORUM: Ubiquitin E3 ligase (FBXW11, SKP1A, CUL1, RBX1)	100043674;21402;26965;103583
CORUM: Ubiquitin E3 ligase (Lrrc41, Tceb1, Tceb2, Cul5, Rbx1)	67673;67923;56438;230654;75717
CORUM: Ubiquitin E3 ligase (Neurl2, Tceb1, Tceb2, Cul5, Rbx1)	67673;56438;67923;415115;75717
CORUM: Ubiquitin E3 ligase (NFKBIA, BTRC, CUL1, SKP1A)	18035;21402;26965;12234
CORUM: Ubiquitin E3 ligase (NFKBIA, FBXW11, CUL1, SKP1A)	18035;21402;26965;103583
CORUM: Ubiquitin E3 ligase (SKP1A, BTRC, CUL1)	21402;26965;12234
CORUM: Ubiquitin E3 ligase (SMAD3, BTRC, CUL1, SKP1A, RBX1)	100043674;21402;17127;26965;12234
CORUM: Ubiquitin E3 ligase (Socs1, Tceb1, Tceb2, Cul5, Rbx1)	67673;67923;56438;75717;12703
CORUM: Ubiquitin E3 ligase (Tceb1, Tceb2, Tceb3, Cul5, Rbx1)	67673;67923;56438;27224;75717
CORUM: Ubiquitin E3 ligase (Vhl, Tceb1, Tceb2, Cul5, Rbx1)	67673;67923;56438;22346;75717
CORUM: Ubiquitin E3 ligase (Wsb1, Tceb1, Tceb2, Cul5, Rbx1)	67673;67923;56438;78889;75717
CORUM: ULK1-ATG13-RB1CC1-ATG101 complex	51897;22241;12421;68118
CORUM: URI complex (Unconventional prefoldin RPB5 Interactor)	19777;66420;21402;27401;26965;18637;56792;20174;56505
CORUM: USP22-SAGA complex	101206;24075;217218;231151;14534;407786;216825;100683
CORUM: v-ATPase-Ragulator-AXIN/LKB1-AMPK complex	12005;68576;11966;11984;11964;19082;11972;66096;105787;20869;66508;56692;83409;19079
CORUM: Vacuolar ATPase	11973;66335;11984;11964;110935;73834;54411;11972;66290;11974;70495;66144;11975
CORUM: VCP-SELK-DERL1 complex	269523;67819;80795
CORUM: VCP-VIMP-DERL1-DERL2-HRD1-SEL1L complex	269523;74126;109815;67819;116891;20338
CORUM: VEGFR2-S1PR1-ERK1/2-PKC-alpha complex	18750;13609;26417;26413;16542
CORUM: VEGFR2-S1PR2-ERK1/2-PKC-alpha complex	14739;18750;26417;26413;16542
CORUM: VEGFR2-S1PR3-ERK1/2-PKC-alpha complex	18750;26417;26413;16542;13610
CORUM: VEGFR2-S1PR5-ERK1/2-PKC-alpha complex	18750;26417;26413;16542;94226
CORUM: Vigilin-DNA-PK-Ku antigen complex	14375;22596;19090;110611
CORUM: Vps29-Vps35-Vps26a complex	30930;65114;56433
CORUM: WASH complex	68767;223593;319277;67282;28006
CORUM: WASH-CAPZalpa/beta complex	68767;12345;12340;223593;319277;67282;28006
CORUM: Wave-2 complex	20430;11308;101314;50884;242687
CORUM: Wave-2 complex (Rac-activated)	50884;20430;242687;19353;11308
CORUM: WDR41-(C9orf72-SMCR8)-(FIP200-ULK1-ATG13-ATG101) complex	51897;22241;12421;237782;73205;68118;218460
CORUM: WINAC complex	93760;56456;22337;67155;20586;21974;20587;27221;68094;20588;57376;83797;22385;114741
CORUM: WIP-WASp-actin-myosin-IIa complex	215280;67938;17886;22376;17904;11475
CORUM: XFIM complex	99982;14886;433759;56364;15182
CORUM: Xin-Cdh2-Ctnnb1-Ctnnd1 complex	22437;12558;12388;12387
CORUM: Yotiao-RII-NR1 complex	19087;19088;14810;100986
CORUM: Zip-Prkcz-Kcnab2 complex	18412;18762;16498
LopitDC: CYTOSOL	21991;56726;15374;23980;433182;18643;19659;28015;14870;75454;16592;11747;22153;50927;66273;11758;15525;22143;22146;18746;16952;13685;93692;18538;53323;15505;108147;15516;20867;66849;11821;16765;21371;22152;109801;16828;67895;110175;18648;18221;22145;12928;100043508;14866;14567;70025;20823;56459;67059;66411;15519;72157;100233175;11746;224530;17449;22201;19042;16832;66385;16993;269378;74098;58810;1…
LopitDC: ER	18453;19035;216197;14827;12406;12304;66624;67397;71853;12330;244373;12282;18194;103963;56491;56530;19246;71881;67154;73024;19672;27061;67006;66212;20818;53328;64136;72029;30960;20014;67398;98238;76299;224630;11938;17252;226144;12846;109815;67454;67902;338366;50907;65973;140484;105245;69605;13480;56529;66073;66375;66753;67490;320011;66087;72736;66958;57377;74205;140740;27368;18984;15369;20397;1811…
LopitDC: GA	105348;27277;108148;319996;53334;73124;67883;217664;108150;14423;20340;72727;22022;215015;17158;53618;22021;76025;227619;74140;17156;99237;21982;58193;108760;242291;93683;59048;67158;107358;23908;107895;73836;72136;270066;17155;78752;68861;12497;269941;17308;74241;15531;67864;67063
LopitDC: LYSOSOME	14251;67963;14252;13033;13030;19156;14466;11886;11432;13039;19063;14590;66848;13032;83768;11605;75612;192654;64138;14387;17159;15212;12091;17939;74617;13423;50917;100037283;12492;71772;18807;12751;19025;110006;54381;72461;18010;27419;14667;78339;74245;11883;65972;211286;75216;56464;14420;110173;13036;27029;15931;15932;22619;11881;14824;71665;14325;19141;20597;17160
LopitDC: MITOCHONDRION	15510;12034;22333;100042918;380773;24071;15528;67530;28080;17448;66593;66488;18673;52538;11946;74316;15526;22335;66419;20740;11637;66416;12856;78330;67003;67713;97212;17992;67880;11947;110323;105675;110074;30056;11429;110826;20742;66170;22334;14194;15108;66592;56248;17991;12857;110446;11370;14719;11740;93747;13008;66414;22272;110842;13063;68463;233870;108037;14057;209027;68117;65970;13007;21780;2…
LopitDC: NUCLEUS/CHROMATIN	17758;53379;13207;56292;76936;16549;321022;13627;55949;66118;51886;69386;13665;106143;16201;54196;16906;225027;15388;13681;67781;53356;16907;15387;107686;67204;73826;68705;72151;243529;66704;67040;98404;27632;19655;21399;78388;13664;192170;108911;72117;22596;78651;231887;15381;108014;72621;57376;68183;66711;77862;66125;28000;19691;66882;20220;66085;59013;14375;67959;23942;110809;56309;66679;14211…
LopitDC: PEROXISOME	12359;15488;20280;228061;113868;18632;19299;28200;338355;26378;13185;74159;11430;18633;74147;67420;56273;80911;170789;103737;19301;66887;56794;16922;11666;14712;100163;56535;71767;20524;72759;19302;102632
LopitDC: PM	14707;20619;26941;108100;18000;22350;215449;18483;235072;12388;12385;14678;53860;13823;108909;18176;14679;14701;68328;56524;218952;66922;77407;14708;20362;20130;18260;11928;17254;20909;14432;16653;56526;56212;12387;16410;71461;22612;14677;20614;76438;94332;20194;54135;12215;14683;75744;57278;16480;13052;14688;12799;11845;17913;18951;103080;14793;109905;69399;52398;30060;20912;26913;384009;14693;7…
LopitDC: PROTEASOME	19181;19179;53382;26444;69077;23997;19173;66997;26440;22123;26441;26443;21762;23996;19166;19185;19170;70247;19172;66413;110639;232449;26445;59029;19167;26446;16913;17463;57296;19177;19175;69748;19171
LopitDC: RIBOSOME	27050;14694;67186;65019;30795;108156;267019;20005;20055;20085;269261;20068;57808;11837;29819;67671;27207;19988;319195;56449;218490;68052;20853;16785;229317;76846;665964;27367;72572;19946;319765;19989;54127;16898;68193;114641;19941;231659;110954;67198;66475;19942;66481;19943;20084;22121;20115;19933;67891;621697;623174;75617;19981;20042;67025;20103;13494;23874;218236;67097;20104;76808;26961;66483;2…
LopitDC: unknown	16852;15507;18655;17357;18768;22352;268373;56205;12306;14228;14433;68196;12632;66395;19182;12631;15191;52009;19186;67474;68045;19324;12461;22154;67771;11674;22627;21346;13167;68365;12317;227613;16691;269523;59021;54683;71994;17698;12464;17758;12798;20617;57320;13722;16667;320267;56330;22330;14569;109672;109711;15481;245841;56305;18746;70620;55948;22070;12469;12934;20024;66589;76302;13628;226414;1…
McNally et al., 2017: Retriever Complex	71517;13185;56433
Takamori et al., 2006: Cell surface	17470;12215;12554;12805;53321;268890;17136;18823;17967;17968;269116;330908;320840;235106;21838
Takamori et al., 2006: Chaperones	12330;21454;12462;12464;12466;14828;15481;19035
Takamori et al., 2006: Cytoskeleton	56443;67771;74192;66713;74117;11459;11461;12343;12345;13191;68097;13424;226180;16572;16573;17754;17760;17918;235072;22142;22145;227613;22154
Takamori et al., 2006: Endocytosis- related proteins	11764;11772;11773;232910;64933;13429;13430;103967;14251;233489
Takamori et al., 2006: Metabolic enzymes	11674;11676;13437;104112;67373;12709;12716;235339;78920;13483;13200;433182;14104;14194;14417;14661;14719;14645;625249;15275;16832;22072;18641;18642;56421;67054;18679;14433;18746;21881;22630;22631
Takamori et al., 2006: Novel	66049;212139;70381;226016;67254;102093;269951;76161;19331
Takamori et al., 2006: Other trafficking proteins	12217;13002;13447;76161;105853;20910;18195;26875;105504;20972;104001;56807;56013;20964;20965;27204;20977;72003;19027;20979;20980;53420;171180;110058;68581;245828;27096;233405;22365;30960;22393
Takamori et al., 2006: Others	11744;11749;11816;13063;72393;14325;14319;14109;14827;100503605;12282;14768;50918;18015;17988;18223;226115;69981;19261;64383;20621;13628;104082;56442;195018
Takamori et al., 2006: Proteasome	26440;26441;19179;19181;19182;23996;19184;21762;22123
Takamori et al., 2006: RNA Processing/Translation	13627;66590;27367;270106;18951;27050;20102;20104;20084;78294;545531;75420;22186
Takamori et al., 2006: Signalling molecules	12322;12323;12325;27373;18751;18752;18693;104831;56294;19276;20779;12933;12799;14360;14432;52589;14681;14674;14678;14682;14687;14688;14693;14695;14696;16438;224020;84095;18807;53328;56392;26950;20203
Takamori et al., 2006: Small GTPases and related proteins	19324;215449;59021;76338;19339;69908;67295;19340;19341;19342;271457;19349;17274;235442;19325;19326;68365;104886;19330;216344;328778;80718;75985;106572;77407;74012;16653;76932;67166;17532;19894;56044;19353;11852
Takamori et al., 2006: Trafficking proteins (SNAREs)	20907;56216;58244;53331;100226;20614;67474;67826;78808;22318;22319;20955;20333;53611
Takamori et al., 2006: Transporter / Channel	11946;11975;11984;11972;11966;66335;73834;11973;66144;66237;108664;54411;67972;11941;11928;98660;232975;11931;22784;20511;72961;140919;20527;239606;229706;22348;26949;64051;64176;75209;234267;22333;22334;76376;110891
Takamori et al., 2006: All	20907;56216;58244;53331;100226;20614;67474;67826;78808;22318;22319;20955;20333;53611;11764;11772;11773;232910;64933;13429;13430;103967;14251;233489;19324;215449;59021;76338;19339;69908;67295;19340;19341;19342;271457;19349;17274;235442;19325;19326;68365;104886;19330;216344;328778;80718;75985;106572;77407;74012;16653;76932;67166;17532;19894;56044;19353;11852;12217;13002;13447;76161;105853;20910;181…
Uezu et al., 2016: Arhgef9	14400;14401;14402;216856;14396;236915;268566;14395;14394;110886;14406;20320;99470;18643;52357;23920;627214;14580;243312;17470;13510;242864;75409;11933;214531;94332;18807;380686;13885;16423;21838;74430;271457;19339;22333;15898;12215;14694;11658;192662;109689;11931;235106;239857;14678;19349;14810;20977;19344;66049;93687;11465;17136;382253;107831;11932;66514;260299;56550;18749;14768;14682;18747;2073…
Uezu et al., 2016: Gphn	268566;243621;13800;236915;14026;386750;216856;14396;14402;99470;20320;56455;18643;13527;68097;627214;93687;208922;382034;213988;81702;330914;240185;224129;231207;245666;52357;116733;15469;66514;13544;21872;13885;64933;19280;109689;72927;94090;380686;11933;75409;233405;67295;170772;319504;67826;77579;12330;13542;67916;217473;14694;19342;18749;18472;19339;22333;18807;56443;224617;271457;242864;136…
Uezu et al., 2016: InSyn1	268566;13527;13405;20648;236915;216856;55992;14402;319477;11838;59003;70598;71923;93687;67694;52696;104318;330177;27373;627214;11764;71069;71770;212139;170772;67809;NA;18574;12009;72572;224129;12589;66648;109658;26556;381110;52357;232910;16568;382253;20418;211652;241638;16569;330369;215707;19047;50932;19045;13722;19046;13544;11773;245684;69940;83767;109689;67826;242864;13542;54610;319504;21838;13…
Uezu et al., 2016: iPSD	268566;14400;14401;14402;216856;14396;236915;243621;13800;14395;14394;13527;110886;14026;386750;13405;20648;14406;55992;20320;99470;56455;18643;68097;319477;11838;59003;70598;627214;71923;93687;52357;208922;67694;23920;52696;104318;330177;27373;11764;71069;382034;213988;71770;212139;170772;67809;NA;18574;12009;81702;330914;72572;240185;224129;14580;12589;66648;109658;26556;381110;231207;245666;24…
Uezu et al., 2016: ePSD	192167;93840;17912;67815;214459;19384;13383;245684;77531;216856;16490;245666;108100;210274;382253;245537;58234;13385;14810;242667;16485;75409;74342;14799;58194;243548;50932;242274;545156;14812;14811;14806;228836;244310;224997;69601;11946;23859;12704;72555;74007;432763;54377;13869;246317;110082;243499;107831;232813;12300;241568;192198;230775;107971;272381;333605;81905;380702;380785;107065;16494;21…
Uniprot: [Isoform 1]: Cell membrane	19153;73728;27387;23963;12215;13052;110893
Uniprot: [Isoform 1]: Cytoplasm	16170;14815;18813;71795;11426
Uniprot: [Isoform 1]: Endoplasmic reticulum membrane	50850;65973;109754;241274;56812
Uniprot: [Isoform 1]: Mitochondrion	27045;110695;23986;14660;27369
Uniprot: [Isoform 2]: Cytoplasm	19153;18813;18762;20742;76788;233073;71795;27045;14651;50780;360013;11426;50850;16443;28000;27369;56812
Uniprot: [Isoform Mitochondrial]: Mitochondrion	625249;21780;14194;54683
Uniprot: Apical cell membrane	110380;13039;16952;22350;17698;20509;12695;102098;229709;193385;241324;67880;71670;63873;58810;56217;56188;74206;18671;13479;19330;20510;209558;69981;27205;56485;381353;234214;13731;19092;13383;121021;20539;16525;13030;17254;11514;268345;94229;26357
Uniprot: Basolateral cell membrane	22342;16952;20509;11829;26412;242687;108030;67916;67972;18764;17761;18605;338367;20533;54403;13383;110891;16513;50934;16517;12215;12520;20496;11514;13052;268345;94229;59079;107723;12671
Uniprot: Cell junction	71602;71228;19153;22342;13430;60595;18762;207278;13043;21844;20648;14086;269608;71529;71972;109711;105782;70568;109333;108030;20649;75646;192216;12488;56320;53885;13823;18391;109905;68188;68585;83964;12558;12387;245827;319387;13383;94332;17254;16485;396184;171486;67374;16508;110893
Uniprot: Cell junction, adherens junction	668158;19159;53378;18717;329165;19158;240185;22330;240514;233335;68810;105782;209630;75739;108903;52906;93742;72621;63873;192216;56217;19157;53885;17356;51789;215008;228564;99167;381353;18163;20401;233765;216613;12386;11789;69697;12388;12387;11487;13642;13052;13838
Uniprot: Cell junction, focal adhesion	53378;16202;18717;11567;18479;21894;19248;22323;244418;13043;12927;22330;70549;70568;209039;83767;72333;29815;54519;118449;234214;15567;244895;20779;107831;399558;16412;16402;19262;16410;396184;330938;71436
Uniprot: Cell junction, gap junction	14609;21872;118454;18133
Uniprot: Cell junction, synapse	11603;223254;20617;27418;12322;17755;18786;12323;13430;17921;16500;16592;214585;109934;13169;55983;110279;237868;71972;70549;27062;320405;104027;71729;235415;83767;54645;106025;26419;13527;241638;230235;67972;12268;14265;330222;114873;381979;208922;78070;270163;94090;20698;67166;81840;20964;56177;14811;432763;15567;13385;110524;242667;238988;73750;210274;20974;72555;224997;11838;26556;69017;22975…
Uniprot: Cell junction, synapse, postsynapse	27418;105782;56376;64085;26562;13116;94190;56013;229706;94229;232370
Uniprot: Cell junction, synapse, postsynaptic cell membrane	13405;14395;16500;217480;239217;268566;74053;26422;14265;60409;235086;11735;14811;19894;14812;14814;432763;109676;83945;56149;11838;14799;14800;383348;14654;216856;230868;110304;67979;12404;14406;14658;14400;14394;14402;14401;268345;110886;64295;16508
Uniprot: Cell junction, synapse, postsynaptic density	71228;12322;13430;16592;234353;243621;236915;13169;110279;66259;217124;330914;14299;268566;104027;56376;230863;74053;269180;241638;13497;67579;208922;72296;18011;22671;229521;235086;627214;13385;242667;242274;210274;232227;23859;192167;56013;11838;26556;19280;12794;107831;13383;18212;11514;50997;20355
Uniprot: Cell junction, synapse, postsynaptic density membrane	22342;108030;433485;18391;12288;216169;81840;432763;232813;69017;14799;14800;380702;226016;81905;70178;16510;269060
Uniprot: Cell junction, synapse, presynapse	15114;15114;12889;12890;224617;20404;100503185;105782;16467;56376;20975;269774;13116;66049;216831;13385;94190;64051;56013;232333;12801;229706;20362;16485;94229
Uniprot: Cell junction, synapse, presynaptic active zone	381979;12217;382018;238988;111173;67808;26875
Uniprot: Cell junction, synapse, presynaptic cell membrane	239217;387524;227801;14265;84095;320150;382018;69017;16502;16490;383348;330814;170571;18189;54525;16485;11514;268345;16510;16504;58235
Uniprot: Cell junction, synapse, synaptic cell membrane	192167;16525;29873;54725
Uniprot: Cell junction, synapse, synaptosome	18752;30794;16500;76884;66259;20430;76709;16443;14265;20510;84095;140919;74480;213469;81840;22253;20907;12300;22784;72961;20977;246221;19280;20614;16490;330814;399558;16498;268345;56533
Uniprot: Cell junction, tight junction	110380;668158;19159;16456;22342;21872;260305;70737;19158;12695;209630;75739;108903;104027;108030;93742;99470;56217;19157;53885;18571;58187;21873;16800;244585;83964;30960;20401;54357;13052;71566;67374
Uniprot: Cell membrane	66313;269615;327655;11603;98741;68813;19283;224020;109620;101706;71228;223254;13367;19159;53378;53413;12333;24012;19153;14133;18718;330953;18479;16456;22342;14768;16409;15519;11421;16952;16952;13627;17762;12475;15516;11820;14645;13809;22352;18750;14609;17698;14395;17528;50884;11651;21872;12988;20509;20511;11829;20512;234577;238130;57028;12540;66105;19158;15289;22218;18752;19055;14694;56705;18720;…
Uniprot: Cell membrane, sarcolemma	13405;11829;19055;16500;20648;19058;22330;217154;12295;20649;56188;24052;12288;69642;77626;56485;11735;12558;13383;20392;18585;11931;11928;56543;16508;110893;243853
Uniprot: Cell membrane, sarcolemma, T-tubule	30948;56188;12288;52331;11735;109676
Uniprot: Cell projection	20336;22350;11829;68089;66713;19158;73728;13043;108155;240058;74117;67771;76709;52822;56378;56320;26425;13829;28240;81840;20401;223435;20527;224650;20266;23966;228852;237847;16525;330267;102058;23970
Uniprot: Cell projection, axon	269254;319934;15114;11567;18039;18040;17762;19132;380684;16500;214585;109934;12927;73205;338355;110279;237868;360213;17760;100503185;319504;16467;71653;73420;54645;117148;353172;72333;56217;16565;16564;56527;77116;15185;12268;14265;20595;66725;381983;15572;67579;105689;11302;78070;73991;226518;67299;72162;13518;110012;67166;70495;229521;11735;22253;56177;66049;12386;13385;72145;212706;73242;23859…
Uniprot: Cell projection, cilium	70892;106633;12589;16952;12402;16568;71820;16569;81896;230967;264134;67884;216805;73420;76779;52392;83922;67042;78795;67286;67466;63873;75695;53885;19893;56350;23955;213081;140810;328108;102774;76260;381353;320634;19376;17274;224129;11512;330286;104111;19889
Uniprot: Cell projection, cilium membrane	13660;18764;69672;71492;76260;67474;52028;57440;171469
Uniprot: Cell projection, cilium, flagellum	20322;67042;26554;56018;102774;13382;73333;235072;18952;18000;56526;11490
Uniprot: Cell projection, cilium, photoreceptor outer segment	20215;13003;67884;224824;50769;17089;213081;320634;20908;12215
Uniprot: Cell projection, dendrite	70892;98741;15114;17762;12322;17756;14395;12540;18752;14694;16500;13401;76484;214585;53872;13169;237868;51792;17760;16467;268566;67792;244886;71729;54645;29813;117148;74053;64085;70357;16565;16564;56320;56527;55992;26562;12891;15185;241638;12268;14265;12288;17169;13728;13497;84095;66725;338367;381983;15572;18196;67579;208922;11302;78070;244962;94090;74480;192160;226778;72162;57138;18011;110012;81…
Uniprot: Cell projection, dendritic spine	333605;15114;12322;17755;329165;19055;30794;109934;110279;217124;330914;104027;241638;14265;67579;210293;216169;81840;77097;14811;19894;216831;13385;210274;327814;94190;11838;26556;69017;12794;14799;107831;226016;52398;70178;234267;16508;110893
Uniprot: Cell projection, filopodium	329165;71820;14086;17920;16332;24001;70093;193385;71653;52822;22152;17772;14265;22253;234267
Uniprot: Cell projection, filopodium tip	14265;71720;226123
Uniprot: Cell projection, growth cone	269254;15114;11820;12568;19158;22284;12933;14086;73205;211446;24001;16467;192176;71653;107371;52822;22152;72333;16565;56320;18391;14265;15572;67579;11302;270163;22253;73750;30957;19280;233552;330814;16728;234267;19164;20257;100503659;102058
Uniprot: Cell projection, invadopodium	18479;14086;225115;52822
Uniprot: Cell projection, lamellipodium	16202;11567;12631;12568;14163;16885;329165;18720;30794;19877;18103;226751;234695;108686;53872;18803;13205;13169;19249;269608;59009;20947;16332;107589;24001;20430;105782;104418;109333;71653;73341;70394;192292;80281;70420;52822;22152;72333;23790;16443;18458;14026;217866;54519;56440;22253;234214;11789;68732;170758;16412;19353;57816;11848
Uniprot: Cell projection, lamellipodium membrane	12631;50884;57028;12540;22323;76088;16490;67784;121021
Uniprot: Cell projection, microvillus	14431;22350;17698;19684;14086;17920;27205;12505
Uniprot: Cell projection, microvillus membrane	22350;17698;13479
Uniprot: Cell projection, neuron projection	15114;11567;16560;12569;13169;211446;24001;241159;207565;65945;13193;14265;20595;84095;22671;19280;216344;107448;234267;19164;22360;396184
Uniprot: Cell projection, phagocytic cup	668218;18717;11629;16952;13430;70417;20401;107831;27403;94178
Uniprot: Cell projection, podosome	22388;19248;13043;13169;108101;225115;72333;54324;15387
Uniprot: Cell projection, ruffle	27418;14163;18720;19877;18103;234695;73728;73728;18803;13169;244654;20430;109711;215280;72993;56430;65970;72333;12488;17772;64436;216190;271457;16412;19334;11845
Uniprot: Cell projection, ruffle membrane	13367;18717;11629;18479;22350;57028;234353;73728;16706;18826;17920;74002;11426;23790;76499;219135;210376;75778;11789;27387;216190;27403;24064;18585;16412;57816
Uniprot: Cell projection, stereocilium	97031;17524;13860;207278;102502;193385;70394;98845;23999;226123;73750;26557;11512
Uniprot: Cell surface	21894;16976;51810;22253;327814;12558;121021;16412;16402;12166;11881;23821;14745;29873
Uniprot: Chromosome	68817;269254;233904;665775;101706;20817;20815;18479;20020;22596;97165;17685;17688;229906;15289;19360;17216;20833;15441;56045;19357;218850;74522;252870;117599;77065;98415;108911;404634;100206;72486;232210;66983;106821;51810;74022;236733;94232;386649;245000;23825;11545;14265;71175;74355;52874;67490;226026;66942;230082;216853;100088;228889;66404;13006;66225;26914;24010;15270;14194;97827
Uniprot: Chromosome, centromere	13144;19052;19357;51792;108911;78610;14265;13006
Uniprot: Chromosome, centromere, kinetochore	75786;108989;23837;19387;19047;53951;72124;445007;51810;70998;22680;17120;12237;26951;93687;234865;73139
Uniprot: Chromosome, telomere	269254;21750;19360;68964;108689;226026;216853;72162;21951
Uniprot: Cleavage furrow	19047;320795;73728;74002;107589;109333;225115;72008;18739;68166;216344;72469;11845;56044;11848
Uniprot: Cytoplasm	66313;100072;66185;269254;269615;73945;229603;68813;434130;668218;319934;75547;224020;70769;71602;108989;71724;30948;14904;19211;11758;22215;13191;13367;19305;19170;18208;19933;26408;12333;11737;29858;15114;11761;20817;13144;53414;24012;54195;15354;20874;55980;20617;16210;19153;19173;17970;18717;18718;18107;18108;14200;19167;20815;16150;13427;56392;26572;26891;26893;56208;56208;18479;56324;56697;…
Uniprot: Cytoplasm, cell cortex	668218;75547;101706;13191;27418;12721;22350;54130;17921;14086;13169;67095;330914;75739;67665;17886;192292;30926;75646;56320;17925;23790;338367;23897;269587;194401;11838;14677;68743;54418;13822;16504;56079;11848
Uniprot: Cytoplasm, Cytoplasmic ribonucleoprotein granule	230594;17454;14265;192160
Uniprot: Cytoplasm, cytoskeleton	227634;110380;100503085;75547;109620;71602;101706;13191;13367;53378;15114;11629;54132;22388;11567;13427;12721;18039;18040;17762;13405;17755;19132;12631;380684;22352;22350;17698;16568;16560;16572;13430;21916;14163;16885;22003;68089;57028;66713;54130;329165;30794;19877;22323;12933;17921;22154;68519;208158;109359;234695;11352;59003;77767;13589;12729;18826;20648;20650;14086;16573;13169;19249;22330;71…
Uniprot: Cytoplasm, cytoskeleton, cilium axoneme	105000;73668;71820;74682;207425;73420;53885;26425;327954;110350;110012;64436;69697;232944
Uniprot: Cytoplasm, cytoskeleton, cilium basal body	70892;106633;71228;18582;14083;12469;260305;12464;108686;71820;81896;101565;74256;74682;67886;67884;207425;52906;73420;70314;232906;83922;78795;107566;26425;74081;213081;382253;140810;231225;12009;93687;244585;230872;71492;99167;110012;72569;18536;78933;69697;232944;194401;19325;12387;208846;17274
Uniprot: Cytoplasm, cytoskeleton, microtubule organizing center	20340;72948;360013;26425;68059;74525;16971;232944
Uniprot: Cytoplasm, cytoskeleton, microtubule organizing center, centrosome	75786;227800;434130;106633;101706;13191;13367;13144;12211;14815;21454;15511;13669;26395;12469;18004;260305;12540;54130;20115;383295;12464;12465;12933;56772;68053;223723;71820;13589;22088;18148;18226;545389;230249;240514;100986;101565;74256;230967;74682;320299;319675;108903;67665;216805;73420;51810;70314;224023;69654;66530;98258;68045;386649;74201;17245;72008;59125;26554;19893;26370;18571;74081;32…
Uniprot: Cytoplasm, cytoskeleton, microtubule organizing center, centrosome, centriolar satellite	12009;71492;99167;76260;18536;52028
Uniprot: Cytoplasm, cytoskeleton, microtubule organizing center, centrosome, centriole	13191;16568;19877;108686;545389;101565;230967;319675;52906;73420;68767;66165;17245;78795;75695;26425;26370;74081;140810;15204;230872;76260;78933;17274;214552
Uniprot: Cytoplasm, cytoskeleton, spindle	75786;108989;12757;13191;13367;14815;15507;15512;19387;12540;27050;12933;28114;223723;20729;545389;329152;72948;74256;74187;108911;271981;319675;270058;231912;216805;73420;445007;51810;224023;72199;26554;22680;74081;26951;231807;16800;67070;28000;67166;73139;67300;194401;73242;72083;66834;67809;68724;19243
Uniprot: Cytoplasm, cytoskeleton, spindle pole	75786;101706;12211;210766;383295;109359;18226;26390;70466;230967;231912;51810;66165;59125;26554;17120;16563;223921;66679;99412;406217;24010;21951;12387;67809
Uniprot: Cytoplasm, cytoskeleton, stress fiber	14453;60595;77569;232807;14086;107589;70292;329251;67665;80281;17931;75646;65970;23789;14026;78926;13518;330938
Uniprot: Cytoplasm, cytosol	68817;327655;227800;75089;245638;100503085;75547;672511;227648;53378;14873;19933;53413;26754;24012;50797;18582;26897;18107;22241;15926;15183;27418;17762;21454;14645;11898;20341;27643;11668;14225;20638;14228;13722;19899;19043;19988;54217;19042;22791;238130;57028;217365;277854;68051;66475;20090;69878;68011;107686;67332;19384;27370;54127;12889;22230;51797;384783;15444;12890;27041;14381;269523;12759;…
Uniprot: Cytoplasm, myofibril, sarcomere	16202;268783;67665;17772
Uniprot: Cytoplasm, myofibril, sarcomere, M line	17966;20742;109676
Uniprot: Cytoplasm, myofibril, sarcomere, Z line	54132;14200;19055;14300;71999;109711;68810;30926;72333;11472;24131;23950;20595;225288;118449;109676
Uniprot: Cytoplasm, P-body	73205;103135;26987;229663;213541;52502;58184;319817;17454;13209;13684;225929;233833;234699;381305;18983;234594;80912;213988;319278;232791;67070;75901;70640;19704;23897
Uniprot: Cytoplasm, perinuclear region	319934;227648;26407;19215;26754;21823;16572;20469;277854;12569;14694;30794;68519;12759;76303;76608;70834;76884;55932;12695;17920;269608;59009;211446;107528;19070;77980;20430;72949;100502841;14299;68833;104015;107371;94232;68045;66870;67674;24131;54151;17925;13829;23999;77116;23950;17761;18754;18753;14265;19106;68166;67579;27967;192160;225845;67826;170822;114679;66226;66569;66138;19704;22038;23805…
Uniprot: Cytoplasm, Stress granule	23881;27041;269523;217069;13205;73205;13665;66361;207214;229663;53319;56541;17454;18458;14265;21841;13684;15568;226562;192173;68564;208643;67070;192160;72162;230908
Uniprot: Cytoplasmic granule	18054;73158;74370;51810;104721;52502;66222;53612;53379;12317;22608;21843;20595;381305;233871;80913;80912;54633;56758;18536;11846;11980;19164;27416
Uniprot: Cytoplasmic side	668218;101706;108989;223254;24012;16202;18717;17762;13405;12631;12631;22350;22350;22350;17698;17698;17698;14225;50884;50884;16560;21872;57028;57028;57028;12540;12569;56705;30794;30794;20844;12759;218503;207278;234695;21844;22088;18826;20648;22330;22330;109552;381813;70549;17760;74256;74781;108911;269113;268566;268566;266781;67792;67792;209039;234857;234857;16330;225115;217154;217154;102339;228545…
Uniprot: Cytoplasmic vesicle	71602;11820;210998;108686;230249;11736;99311;207425;15463;76501;17846;224619;74053;77573;78885;16565;13660;16443;18391;84095;66725;217039;16800;11920;72183;72296;69106;67581;28240;23897;109108;320634;212706;30957;57440;11980;245886;271457;16525;18010;16485;19334;19164;19349;13830;270192;14401;56079;71955;56048
Uniprot: Cytoplasmic vesicle membrane	18582;16952;14395;224617;52850;266781;234857;57436;56430;19027;18764;11766;59287;68166;18196;68151;102607;320150;81840;80976;56209;229521;56334;24056;329877;16582;14811;29869;22348;216344;245886;67790;76161;54418;14406;18197;23821;14394;14402;396184;94178
Uniprot: Cytoplasmic vesicle, autophagosome	15114;93739;17966;73205;225326;78610;56085;57436;68767;66734;80743;94232;77573;54609;72238;70612;52857;19328;19335
Uniprot: Cytoplasmic vesicle, autophagosome membrane	192652;67443;70495;67727;67474;54673;16784;19349;74772
Uniprot: Cytoplasmic vesicle, clathrin-coated vesicle	71602;18704;17920;100503185;52639;80743;12891;51789;233405;218035;233489;77407;213326;11487;11899;56079
Uniprot: Cytoplasmic vesicle, clathrin-coated vesicle membrane	13169;227801;67602;66147;11774;229521;70335;11514
Uniprot: Cytoplasmic vesicle, COPI-coated vesicle membrane	70349;195040;66111;68137;56334
Uniprot: Cytoplasmic vesicle, COPII-coated vesicle membrane	18570;67898;20334;20788;77371;69162;235623;67727;110379;27054
Uniprot: Cytoplasmic vesicle, phagosome	13040;104759;72993;56717;54198;229521;19376;216190;19334;68365;106572;56382
Uniprot: Cytoplasmic vesicle, phagosome membrane	12721;13430;16330;18711;19326;72519;320634;19325;19376;216190;271457;54525;17274;19349;219024;94178;56382
Uniprot: Cytoplasmic vesicle, secretory vesicle	215821;18549;12652;12652;20255;12876;381677;245049;19339
Uniprot: Cytoplasmic vesicle, secretory vesicle membrane	215821;20650;17760;52055;107522;20660;20255;12725;19276;18484;12876;69981;68581;20979;328778;13166;54525;16438;19275;114716;54526
Uniprot: Cytoplasmic vesicle, secretory vesicle, acrosome	18747;28105;76899;215008;12009;13382;76787;64176;11838;105670;11490
Uniprot: Cytoplasmic vesicle, secretory vesicle, chromaffin granule membrane	20979;13002;11980;13166
Uniprot: Cytoplasmic vesicle, secretory vesicle, synaptic vesicle	15114;26754;26891;381979;94090;70612;213469;22671;14470;22784;66049;232227;75734
Uniprot: Cytoplasmic vesicle, secretory vesicle, synaptic vesicle membrane	54524;78771;19326;19276;66725;75209;140919;235504;56807;20907;20972;12217;19894;22318;22784;72961;20977;64176;235380;20974;171180;67808;64051;19280;69017;20979;229706;72160;20362;76161;54525;100503659;53420
Uniprot: Early endosome	75089;29809;545030;15114;16952;11820;22224;14070;73825;319277;73122;11652;13169;20404;338355;67095;70829;104759;320119;268752;266781;223593;101490;78610;17846;228545;70314;80743;55992;69368;54198;16835;233405;218035;338367;76438;72296;104799;99237;233280;69091;70612;17237;69178;11757;109676;11781;19324;245886;69150;19334;30930;19164;23821;13838;19243;56079;106572
Uniprot: Early endosome membrane	30794;20844;192652;22088;28006;101240;78287;260302;16330;72993;106039;52055;54645;68767;100561;66530;269180;13660;18711;77116;433485;51800;20660;53612;12725;20510;19341;209200;12727;18196;68151;102607;72183;242864;16396;236792;69178;81840;100226;56786;320634;11838;14799;216344;20408;216190;27403;69150;271457;76161;18807;18212;18197;19164;11845;210108;16510;269060;68365;67213;98878;50877
Uniprot: Endomembrane system	18717;20742;68938;74053;192292;67443;52822;26422;16443;56398;26457;67826;54208;54384;15567;170758;11980;233552;58249;11490;19744
Uniprot: Endoplasmic reticulum	545030;19933;11304;15114;110006;14609;13722;13167;11883;217365;18777;269523;12759;68053;68675;387314;217893;18412;230249;229709;217695;67898;217737;68833;223593;70675;78610;56085;57436;69668;117150;57320;94232;76737;68436;72029;68018;80877;56088;12499;58187;21828;53381;51800;19285;18453;24067;14827;12330;16430;13026;22213;56398;53322;76577;13476;22239;67579;70804;77006;236899;70551;78070;52250;14…
Uniprot: Endoplasmic reticulum lumen	22027;66967;70561;224143;58911;66861;81500;26433;17330;14231;12304;18453;12317;14828;19035;320011;67902;100198;71853;67838;66073;74840;76299;12282;68195;14230;105245
Uniprot: Endoplasmic reticulum membrane	227648;53378;56208;18570;93739;13649;76303;271564;16706;16709;329015;76559;330914;104759;338366;99031;241159;231633;66663;66270;68818;74053;70231;67916;19210;66397;69804;67163;64085;56717;26433;229722;242585;107368;237542;76219;78771;20333;14073;13244;19223;55979;56494;18764;51800;26458;268656;12321;18739;26951;13200;24017;53328;11938;19682;18391;56348;20660;13360;15490;93898;12330;13478;16430;11…
Uniprot: Endoplasmic reticulum-Golgi intermediate compartment	15289;230249;16330;69668;70349;56398;217449;219135;28106;66226;98417;270192
Uniprot: Endoplasmic reticulum-Golgi intermediate compartment membrane	68938;67916;20333;195040;27061;20932;66111;56389;99412;68137;75909;66366;77254;67727;68581;26889;56334;19876;76161;54411
Uniprot: Endosome	30948;13185;56208;12211;18570;12576;15289;320795;13649;18762;18759;216565;73205;67095;230249;67123;268752;71517;72993;52639;69668;54638;50850;50850;16443;12891;51789;50769;84095;66725;76438;76580;22671;114601;69178;65114;22031;320634;14251;68095;77407;11303;18390;23821;14745;14585;19275;11899
Uniprot: Endosome membrane	319934;56208;16952;11829;66105;13649;271564;387524;353047;74374;84092;11736;330914;260302;99031;224705;68299;17846;106039;100561;234852;66201;71982;50915;18222;23790;26562;18711;77116;20660;11766;16432;21871;11305;68059;16004;218035;14132;18196;20661;238252;234729;72238;259300;223697;74051;16396;20698;103199;216169;74104;56433;56440;15567;279572;19335;19325;216190;271457;76161;213326;18807;26372;…
Uniprot: Endosome, multivesicular body	230249;83814;14585
Uniprot: Endosome, multivesicular body membrane	20660;18196;66241;18197;74772
Uniprot: Extracellular side	14133;13039;16952;15289;20361;53328;12846;20661;16971;68585;12261;11946;171171;80883;121021;121021;121021;13030
Uniprot: Golgi apparatus	29809;19215;12475;12402;13722;13167;27883;93739;68053;208158;271564;14784;18704;17920;75687;211446;100986;17760;83679;217695;14299;213760;67886;83814;27374;57436;66663;76895;70231;56846;68018;56217;26554;56278;360013;11426;11426;53424;19893;11774;74136;320714;17777;17777;18764;12321;22129;16835;50769;74004;16800;233489;242291;72296;99237;14376;241075;98376;76499;320191;69806;76688;76932;69981;114…
Uniprot: Golgi apparatus lumen	16976;20318;27416
Uniprot: Golgi apparatus membrane	227648;14348;13649;76303;15531;70028;233824;55932;26412;20340;13169;19347;71617;330914;107650;320615;211499;102339;52055;54214;70231;67916;78885;64085;70349;56717;54161;107522;14073;56494;20660;11766;53334;22234;225742;14043;14042;16004;14421;210992;20788;66725;381983;20932;230101;68151;68151;235623;242362;77626;320150;73991;242864;170760;226518;77929;67549;104001;100317;56389;236792;23908;107895…
Uniprot: Golgi apparatus, cis-Golgi network	16976;19338;72727
Uniprot: Golgi apparatus, cis-Golgi network membrane	66270;20333;56494;51800;18220;66111;215160;74498;99412;66366;68581;68268;67180;56334
Uniprot: Golgi apparatus, Golgi stack	71972;217695;70675;386649
Uniprot: Golgi apparatus, Golgi stack membrane	69710;19070;66397;18739;20444;18196;20661;66111;66629;64436;56334;18197
Uniprot: Golgi apparatus, trans-Golgi network	11820;227446;210998;68505;18760;59009;52850;213760;380752;207425;52639;67015;80877;360013;55992;12389;218035;76499;76688;70612;67581;30052;320634;107975;216344;245827;23821;14585;106572
Uniprot: Golgi apparatus, trans-Golgi network membrane	56208;12211;14348;11840;217030;17920;104759;260302;277463;224705;68299;106039;54214;67916;76899;67015;229722;20333;51800;20660;84095;18196;11977;242291;108011;236727;100317;76932;66629;68581;66500;229521;11782;11781;19325;11844;545192;67489;213326;18197;11845;68365
Uniprot: Late endosome	18412;225326;67561;78610;70160;64291;67894;17772;16835;218035;104799;69091;70612;269338;14812;245886;80718;11891;16783;16337;19334;23821;56079;73067;56382
Uniprot: Late endosome membrane	192652;22088;59045;101240;228545;76482;71732;80743;66530;75608;18711;229722;53612;12725;12725;20510;233405;12727;18196;244962;69106;217265;66082;269338;67166;66241;72519;22784;545192;68724;66626;70423;18807;18145;18197;19349;11852;219024;94178;74772;66552
Uniprot: Lateral cell membrane	101706;16952;16500;51792;75739;108903;14673
Uniprot: Lipid droplet	19659;271564;16179;329015;76559;217695;50850;18739;26951;18391;57435;19330;16890;22213;11993;76577;210992;68832;407819;28000;114664;18194;14705;71361;67469;228983;241274;19349;270084
Uniprot: Lipid-anchor	238276;101706;18747;14645;17118;19043;19042;104303;11843;12569;19179;20116;53602;18749;17524;11840;63913;212880;432572;14208;26414;20423;19058;381813;17760;71900;76820;14299;268566;268566;73124;69190;235415;227737;57436;19298;75669;68818;223601;70231;57320;67443;67443;66480;78688;83397;26562;12799;17096;19326;19326;19326;56398;84095;84095;76438;226518;226518;216169;216169;22038;15159;13385;66098;…
Uniprot: Lipid-anchor, GPI-anchor	12475;100340;20361;11647;13479;13479;13636;230868;171171;80883;269295;237847;65079;14586;14585
Uniprot: Lumenal side	26433;19682;11432;18220;14950;18010;14466;66552
Uniprot: Lysosome	11758;15114;13040;19141;12751;13039;110006;12091;14824;11883;17966;18575;73205;245670;353047;100502841;67561;78610;110173;69668;192654;224023;54170;66840;68576;80877;56717;16563;16835;15931;218035;66725;19156;74347;269338;28240;11735;14812;109676;67111;12421;11886;19339;245886;11891;17939;54397;19063;13030;16337;11881;23821;14387;20597;71665;67963;14590;16889
Uniprot: Lysosome lumen	241159;105298;11432;18196;68195;18807;18010;18197;71772
Uniprot: Lysosome membrane	277854;70834;271564;192652;216742;387524;353047;74374;14628;216805;72124;228545;76482;70394;71732;100561;101142;80743;66530;77573;71923;56717;21425;230676;229722;53612;11432;11305;11666;12725;233405;52120;209200;12727;270802;20661;75620;244962;235504;319481;268933;217265;66082;269338;252875;17168;64294;208795;67166;66241;70495;72519;110379;72368;56700;56786;229521;22784;56632;19328;11972;54525;68…
Uniprot: Matrix side	14712;54405;21856;12858;12859;11947;12850;11946;68971;230075;66461;66414;78330;229211;66945;11949;226646;68202;68198;68197;17991;68194;66046;66218;67713;67130;66495;17993;22273;67264;67530;69875;67003;68342;67184;66416
Uniprot: Melanosome	53378;12751;15519;22027;15516;53605;22627;19384;12464;56463;54401;18571;20333;12321;12304;18453;19035;14827;12330;59287;22042;97761;14376;71853;67878;68581;20972;245049;14251;13002;19324;245886;271457;11891;77407;16412;13030;17254;13830;19353;103963;56382;14590
Uniprot: Membrane	319934;75547;11304;24012;20617;18107;18108;56697;18747;16952;14453;11820;20341;20215;17118;26395;19043;19042;104303;11843;19179;20116;53602;14697;18749;15444;11840;14381;18762;230734;333050;63913;212880;15898;14208;16706;20650;26414;18759;20404;26396;226089;216565;16332;66691;19070;232533;71900;330914;67898;140579;76820;320119;14299;75739;234595;109333;73124;67792;107508;69190;73288;74302;16330;2…
Uniprot: Membrane raft	66313;53378;16150;16409;12475;67916;57320;20975;27984;16974;19264;16414;12389;84095;76438;69106;66592;14251;432530;13731;17136;13641;22333;107448;269295;237847;65079;13830;23821;11514;72393;54447
Uniprot: Membrane, caveola	26413;26417;20324;109042;56188;19285;12389;16890;11548;259300;14251;11514;114715;54447;50877;23970;16508
Uniprot: Membrane, clathrin-coated pit	11820;13430;218503;207278;13043;17920;101490;73094;16443;51789;16835;269774;233489;320634;77407
Uniprot: Membrane, coated pit	13859;16971;16971;11772;11773;11514
Uniprot: Microsome	20815;14645;12759;74340;229709;232223;26458;19285;56403;320024
Uniprot: Microsome membrane	227648;241159;53328;11671;14261;20905;20775;14263;338521;13123;81906;76687;73166;13121;213233;30049;71519;13849;74134;67452;399558;72054;66447;66447
Uniprot: Midbody	13430;12540;383295;19047;320795;223723;211446;225326;108911;271981;109333;78610;225115;229285;51810;98258;75608;18739;231807;78267;54673;105504;194401;17274;320165;71955;64143;11848
Uniprot: Midbody, Midbody ring	53413;20336;12211;22088;107371;69940;66482;72008;18571;11845;56044
Uniprot: Mitochondrion	17117;15114;56697;18747;14815;14645;14228;11566;15473;19047;53357;22201;24014;12759;28114;19777;57815;217893;192652;16561;26414;67269;67095;237868;68626;217695;16467;216767;235041;319801;67884;226757;14479;104721;110948;223601;57320;67857;353172;78688;68277;69168;223776;76263;29876;56016;51800;19285;18753;84095;67416;74241;170760;433256;72162;76267;76192;72831;66208;78248;56200;24056;217149;32100…
Uniprot: Mitochondrion inner membrane	27050;241159;51800;71519;69487;104130;12034;54405;21856;27377;17711;17708;17709;12858;12867;17527;12859;12857;14151;12861;11739;11370;11740;407785;110323;66142;11947;74143;55951;18673;12850;66576;11946;68971;230075;234847;215999;66658;75778;73333;74868;230125;380836;381038;14149;17992;66461;66972;68117;66414;433771;71911;69773;78830;216821;78330;214663;97212;66343;76614;108841;229211;69597;13358;…
Uniprot: Mitochondrion intermembrane space	107566;66629;11692;75778;20480;67892;71701;216001;69893;66592;595136;66916;14004;68375;69923;26926;68195
Uniprot: Mitochondrion matrix	211948;100206;212442;60315;231413;329910;227682;13382;12261;53895;12409;17448;17850;18242;18597;15356;13177;11364;14979;11363;15510;11409;52535;18293;15107;15528;320717;71911;73046;338359;244141;217830;93747;68115;226539;70120;74142;71701;69617;67811;234309;21379;110821;56690;67273;110842;66904;68738;67851;69702;73078;70560;78920;66885;71743;66865;66108;66071;110826;56357;71984;18604;171210;97827
Uniprot: Mitochondrion matrix, mitochondrion nucleoid	68626;72831;15108;21780;338359;75619;108037
Uniprot: Mitochondrion membrane	56208;18750;12759;12759;20322;67095;102632;108155;72759;13244;51800;14232;26568;11666;224630;52250;223752;66082;66958;20930;70257;74143;215951;76889;66477;229517;67452;94280;94282;214917;27801;71361;18186;12048;26357;70310
Uniprot: Mitochondrion outer membrane	229524;271564;72508;241159;74006;56717;51800;53328;66725;67416;71703;193670;67006;74104;54673;14467;53375;14545;15275;17827;230935;68653;239555;320528;170728;231086;67453;24071;74252;67952;53333;15277;11640;12801;12894;69104;67809;100756;215708;22334;22335;14732;75734;170731;67414;228607;97827;52637;67247;207728;66427;237781;109754;108958;110893
Uniprot: Multi-pass membrane protein	98741;11304;330953;20511;11829;11829;11829;11826;13162;118454;234595;18399;67916;67916;67916;67916;67916;67916;67916;19210;69146;76257;54722;230917;20192;20192;20190;20191;20191;13244;19027;18764;18764;18764;56348;22234;15165;21871;14412;11609;11305;11305;13478;16430;11666;11666;11666;20510;20510;11548;15357;15357;17294;83674;68292;74166;319740;319740;76483;68539;68539;68539;52120;380959;239606;2…
Uniprot: Nucleoplasmic side	108989;269966;269113;71844;170762;13726
Uniprot: Nucleus	72584;217207;66313;100072;269254;73945;229603;433022;209966;77987;244059;75547;231386;101706;108989;30948;19211;22215;13367;53378;19170;433759;21750;13204;11737;15114;26754;27756;13144;15354;20617;19153;12418;19173;18718;27886;112403;14200;19167;16150;56392;26572;26891;26893;56208;26430;15183;14815;14815;15519;13870;12326;20020;16952;13627;22166;15516;18570;13433;15507;11837;16854;20341;268373;11…
Uniprot: Nucleus envelope	108989;13191;19387;19384;229700;72357;18226;320938;224742;71805;99031;105513;76895;53319;75608;26370;17120;16443;23825;18391;223921;53322;223433;69642;381629;109095;77626;70804;242864;223697;67812;80860;67878;28169;19386;66049;52123;71955
Uniprot: Nucleus inner membrane	68051;13726;18391;98386;224640;223697;52837;215210;16510
Uniprot: Nucleus matrix	228005;101706;20815;12631;22352;17984;59003;74522;106583;51810;234852;56399;54194;54367;71514;110524
Uniprot: Nucleus membrane	108989;108989;19215;22218;18777;13649;229700;269966;109079;353170;71805;269113;269113;71844;71844;445007;14245;170762;170762;50850;50850;237542;11548;70604;74166;20661;21763;66146;70422;99712;100608;69071;229725;71720;19386;56709;30960;23897;14682;329828;59079;18795
Uniprot: Nucleus outer membrane	68051;51800;18391;68539;260315
Uniprot: Nucleus speckle	66185;228005;233904;77987;231386;20817;12418;20815;19047;22218;18720;68479;20383;229700;67996;230753;22380;22083;20637;432508;16332;110809;192196;217827;233073;26383;75956;56335;80744;68988;234366;72567;67465;66983;70044;51810;225131;53319;74322;69090;70052;60532;56541;53890;23988;56531;54194;14105;67302;21681;20220;24067;66877;225929;268420;74255;225432;13548;18139;71702;109095;66231;233871;7555…
Uniprot: Nucleus, Cajal body	14300;68988;116940;56541;53890;23806;20595;12812;216853;245474;218333
Uniprot: Nucleus, gem	56541;20595;216766
Uniprot: Nucleus, nuclear body	14070;56541;22671
Uniprot: Nucleus, nuclear pore complex	108989;68051;18226;269966;227720;71805;269113;19069;72124;71844;445007;76895;53319;170762;26370;59015;223921;234865;110379;19386;21951
Uniprot: Nucleus, nucleolus	269254;106298;70769;271377;21453;13204;53414;13627;21429;22596;14113;100503670;18813;18114;19046;27050;19047;19090;14300;20833;28114;170719;20729;13207;18148;216443;237107;227522;217827;108911;330361;66538;67014;78428;212547;70044;106821;74108;102614;27966;116940;230737;18150;66249;66161;67738;72662;66801;67025;20826;67860;56399;24128;68083;50911;60315;56541;13211;22110;11545;14265;50912;17089;74…
Uniprot: Nucleus, nucleoplasm	66185;269254;108937;101706;14897;20817;20815;18479;27418;17984;14113;19387;12696;68051;19046;19047;28036;229700;59003;230753;13680;18148;20637;432508;328365;224742;269966;192196;217827;68477;330361;98403;78428;72567;106821;50754;170472;53319;67010;67738;72662;70650;67674;60532;50911;15469;60315;53890;76130;67302;13211;53379;14265;15387;20935;269536;216156;21974;75686;109095;72515;56403;242864;709…
Uniprot: Nucleus, PML body	19211;13144;22218;18412;252870;98403;68275;56717;54194;225929;69642;226026;74203;11865;72145
Uniprot: Perikaryon	70892;98741;11820;19132;16572;12569;12889;14694;12890;12933;27041;16500;13401;76484;13169;73205;24001;192176;67792;244886;104027;240058;71653;74053;52822;56217;12891;15185;20713;14265;53322;20595;12288;13497;84095;66725;338367;15572;107895;72162;28240;18011;22671;81840;229521;229521;18163;56177;66049;72145;23859;19280;20527;16490;20266;14654;110304;269295;237847;65079;16525;14432;16485;18390;2683…
Uniprot: Peripheral membrane protein	668218;319934;75547;71228;227648;108989;108989;223254;19159;53378;53378;19305;24012;18582;14133;18107;18108;56208;56208;56208;56208;22342;22342;22342;14768;13039;16952;16952;16952;16952;17762;13405;14453;18570;20341;12631;12631;20215;18750;18750;22350;22350;22350;17698;17698;17698;14225;26395;16560;13430;21872;20469;57028;57028;57028;12540;66105;66105;27050;19158;15289;19055;14694;56705;30794;307…
Uniprot: Peroxisome	17117;16922;110959;15488;15473;319554;102632;225791;228061;111175;71767;74147;67993;56794;17855;11430;26378;230676;51798;15356;68729;56690;75734;228607;67247;67979
Uniprot: Peroxisome matrix	170789;66887;54683;56690
Uniprot: Peroxisome membrane	19305;14712;74159;228061;19298;67420;224824;72759;56535;56273;18632;26458;11666;15357;225845;18633;67452;54525
Uniprot: Photoreceptor inner segment	67157;14923;77593;73750;20614;20525;12215
Uniprot: Postsynaptic Golgi apparatus	20340;72948;360013;68059;74525;16971
Uniprot: Preautophagosomal structure	22241;217695;54636;66840;68118;51897;12421
Uniprot: Preautophagosomal structure membrane	329015;74781;76559;77040;52639;11793;67526;52331;76308
Uniprot: Recycling endosome	227446;68505;224705;68299;101490;73288;17846;16443;78771;233405;104799;70612;114601;216831;109676;76161;16525;16412;23821;68365;64295
Uniprot: Recycling endosome membrane	30794;260302;52055;54645;68767;269180;13660;51800;20660;53612;19326;12725;20510;19341;319740;12727;18196;236727;81840;100226;229521;229521;57440;14799;19328;19325;226016;545192;76108;17274;70178;16337;74012;72065;67213;98878;50877;53420
Uniprot: Rough endoplasmic reticulum	19215;19899;19988;66475;20090;27370;54127;66481;26433;19942;243853
Uniprot: Sarcoplasmic reticulum	268783;78688;21828;20192;20190;20191;20866;23897
Uniprot: Sarcoplasmic reticulum lumen	22027;12321;12317;74840;12373
Uniprot: Sarcoplasmic reticulum membrane	14225;109552;20192;20190;20191;11938;74166;68539;53313;11937
Uniprot: Secreted	19283;14161;18054;19215;18208;20971;20617;14133;13040;280662;18976;12640;14751;13039;12628;20700;11816;16952;17762;22166;12475;15516;18636;16852;16854;268373;14473;20701;12955;14824;97165;13722;17319;12822;18830;20604;19242;15289;17174;19662;20703;16592;12759;54003;16803;100038882;73205;64706;70561;319504;74145;104009;110135;246703;99571;192654;59027;105298;85305;353172;66222;69146;15925;11801;26…
Uniprot: Secreted, extracellular exosome	53378;16952;15191;28114;353172;18571;224727;53379;22608;12527;54447
Uniprot: Secreted, extracellular space	13039;11816;16952;12630;12810;26433;21828;27226;66208;13030;14590
Uniprot: Secreted, extracellular space, extracellular matrix	11816;16852;69675;13003;12818;18209;21828;214685;14219;16998;108075;70575;399558;19039
Uniprot: Single-pass membrane protein	50884;50884;74159;338366;104009;67420;54524;18632;229722;237542;14073;14073;51800;51800;14232;268656;18391;11671;11671;20773;18484;381983;26457;26457;22239;381629;70422;71764;320360;338320;67006;67006;80976;79196;54646;56709;229521;229521;50907;104130;12867;12857;12861;66142;76889;67426;17992;433771;239555;69773;96979;67452;67452;66152;12864;66594;22272;66046;66495;66694;66445;66525;69029;67184;6…
Uniprot: Single-pass type I membrane protein	19283;16456;16409;16409;11421;11820;11820;17528;13649;13649;13649;13649;93671;15898;13869;70417;14628;229722;229722;229722;229722;13200;20660;20660;20660;20660;20660;20660;20660;20660;20660;12978;16414;16414;16835;12745;59287;59287;20866;20866;11682;16004;16004;330222;233878;13841;56747;56747;20661;20661;20661;20661;20661;20661;11302;227325;103694;213233;213233;16971;83964;81840;81840;56700;54219…
Uniprot: Single-pass type II membrane protein	11603;14348;15531;14598;16709;104759;104759;54608;433485;433485;16432;16432;16432;14043;14043;24052;16790;14042;14042;210992;210992;210992;268880;18196;22042;72278;209558;209558;242362;76687;242291;223697;223697;320024;65973;65973;215494;23908;107895;64294;26879;22038;17252;16795;23887;53320;17308;83921;18807;18807;18807;18807;18807;17254;18197;72727;329828;329828;270084;270084;270084;56279;76898…
Uniprot: Single-pass type III membrane protein	50767;52331;52331;13849;13849;52637;241274;94212;100503659;100503659;20397
Uniprot: Single-pass type IV membrane protein	20333;53612;53334;140499;319984;76763;100226;100226;100226;56228;30960;20907;24071;209743
Uniprot: Vesicle	65945;75659;231807;60409
