# Supplementary material for: Genetic disruption of WASHC4 drives endo-lysosomal dysfunction and cognitive-movement impairments in mice and humans
Source: eLife. 2021 Mar 22;10:e61590. doi: 10.7554/eLife.61590 (PMC7984842; doi:10.7554/eLife.61590)
Supplement: Supplementary file 5. — Description of plasmids used with corresponding DNA sequence files. [file elife-61590-supp5.xlsx]

## Sheet: Table of Contents
Supplementary File 5
Plasmid Constructs
Sheet Name	Description
Plasmids	Description of plasmids used and their corresponding gene sequence files

## Sheet: Plasmids
Plasmid Constructs	Description	Corresponding Figure	DNA file
pAAV2-9	an AAV serotype plasmid used to generate AAV virus	Figure 1	https://github.com/twesleyb/SwipProteomics/blob/master/sequences/dna/pAAV2-9.dna
pAdDeltaF6	the AAV helper plasmid used to generate AAV virus	Figure 1	https://github.com/twesleyb/SwipProteomics/blob/master/sequences/dna/pAdDeltaF6.gbk
pAAV-hSyn1-Washc1-BioID2-HA	the iBioID construct used to make AAV2/9 virus and generate the WASH1-BioID proteome	Figure 1	https://github.com/twesleyb/SwipProteomics/blob/master/sequences/dna/pAAV-hSYN1-Washc1-BioID2-HA.dna
pmCAG-SWIP-MUT-HA	an expression plasmid used to express MUT SWIP in co-immunoprecipitation experiments	Figure 2-Figure supplement 1	https://github.com/twesleyb/SwipProteomics/blob/master/sequences/dna/pmCAG-SWIP_MUT-HA.dna
pmCAG-SWIP-WT-HA	an expression plasmid used to express WT SWIP in co-immunoprecipitation experiments	Figure 2-Figure supplement 1	https://github.com/twesleyb/SwipProteomics/blob/master/sequences/dna/pmCAG-SWIP_WT-HA.dna
